1 **Title:** Ribosome profiling of porcine reproductive and respiratory syndrome virus reveals novel features  
2 of viral gene expression

3

4 **Author names and affiliations:** Georgia M. Cook<sup>1</sup>, Katherine Brown<sup>1</sup>, Pengcheng Shang<sup>2,3</sup>, Yanhua  
5 Li<sup>2,4</sup>, Lior Soday<sup>1,5</sup>, Adam M. Dinan<sup>1,6</sup>, Charlotte Tumescheit<sup>1</sup>, A. P. Adrian Mockett<sup>7</sup>, Ying Fang<sup>\*2,8</sup>,  
6 Andrew E. Firth<sup>\*1</sup>, Ian Brierley<sup>\*1</sup>

7 <sup>1</sup>Department of Pathology, University of Cambridge, UK; <sup>2</sup>Department of Diagnostic Medicine and  
8 Pathobiology, Kansas State University, US; <sup>3</sup>Current address: Department of Pediatrics, School of  
9 Medicine, University of Pittsburgh, US; <sup>4</sup>Current address: College of Veterinary Medicine, Yangzhou  
10 Univeristy, Yangzhou, China; <sup>5</sup>Current address: Department of Chemistry, Molecular Sciences  
11 Research Hub, Imperial College London, London, UK; <sup>6</sup>Current address: Department of Medicine,  
12 University of Cambridge, UK; <sup>7</sup>Cambivac Ltd, Babraham Research Campus, Cambridge, UK; <sup>8</sup>Current  
13 address: Department of Pathobiology, University of Illinois at Urbana-Champaign, US

14

15 **Keywords:** arterivirus, porcine reproductive and respiratory syndrome virus, PRRSV, ribosome  
16 profiling, programmed ribosomal frameshifting, subgenomic mRNAs, open reading frames, nidovirus,  
17 RNA sequencing, transcriptome, translome, gene expression regulation

18

## 19 **Abstract**

20 Porcine reproductive and respiratory syndrome virus (PRRSV) is an arterivirus which causes significant  
21 economic losses to the swine industry worldwide. Here, we use ribosome profiling (RiboSeq) and  
22 parallel RNA sequencing (RNASeq) to characterise the transcriptome and translome of both species  
23 of PRRSV and analyse the host response to infection. We quantified viral gene expression over a  
24 timecourse of infection, and calculated the efficiency of programmed ribosomal frameshifting (PRF) at  
25 both sites on the viral genome. At the nsp2 frameshift site (a rare example of protein-stimulated  
26 frameshifting), -2 PRF efficiency increases over time, likely facilitated by accumulation of the PRF-  
27 stimulatory viral protein (nsp1 $\beta$ ) during infection. This marks arteriviruses as the second example of  
28 temporally regulated PRF. Surprisingly, we also found PRF efficiency at the canonical ORF1b  
29 frameshift site increases over time, in apparent contradiction of the common assumption that RNA  
30 structure-directed frameshift sites operate at a fixed efficiency. This has potential implications for the  
31 numerous other viruses with canonical PRF sites. Furthermore, we discovered several highly translated  
32 additional viral ORFs, the translation of which may be facilitated by multiple novel viral transcripts.  
33 For example, we found a 125-codon ORF overlapping nsp12, which is expressed as highly as nsp12  
34 itself at late stages of replication, and is likely translated from novel subgenomic (sg) RNA transcripts  
35 that overlap the 3' end of ORF1b. Similar transcripts were discovered for both PRRSV-1 and PRRSV-  
36 2, suggesting a potential conserved mechanism for temporal regulation of expression of the 3'-proximal  
37 region of ORF1b. In addition, we identified a highly translated, short upstream ORF (uORF) in the 5'  
38 UTR, the presence of which is highly conserved amongst PRRSV-2 isolates. This is the first application  
39 of RiboSeq to arterivirus-infected cells, and reveals new features which add to the complexity of gene  
40 expression programmes in this important family of nidoviruses.

41

## 42 Introduction

43 Porcine reproductive and respiratory syndrome virus (PRRSV) is an enveloped, positive-sense, single-  
44 stranded RNA virus in the family *Arteriviridae* (order: *Nidovirales*)<sup>1,2</sup>, and the aetiological agent of the  
45 disease from which it takes its name: porcine reproductive and respiratory syndrome (PRRS). Attempts  
46 to control PRRS by vaccination have had limited success<sup>3</sup> and it remains one of the most economically  
47 devastating diseases of swine, causing reproductive failure in adult sows and respiratory failure in  
48 young pigs, at an estimated cost of \$664 million a year in the US alone<sup>4,5</sup>. The two lineages of PRRSV,  
49 formerly known as “European” (Type 1) and “North American” (Type 2) PRRSV, share just ~60%  
50 pairwise nucleotide similarity and were recently re-classified as two separate species, *Betaarterivirus*  
51 *suid 1* and 2 (viruses named PRRSV-1 and PRRSV-2)<sup>5-7</sup>. For ease of reference, PRRSV-1 is herein  
52 referred to as EU (European) and PRRSV-2 as NA (North American) PRRSV, although both lineages  
53 are observed worldwide<sup>8</sup>.

54 The PRRSV genome (14.9–15.5 kb; Figure 1A) is 5'-capped, 3'-polyadenylated and directly translated  
55 following release into the cytoplasm<sup>9</sup>. Like most members of the order *Nidovirales*, PRRSV replication  
56 includes the production of a nested set of subgenomic (sg) RNAs by discontinuous transcription, where  
57 the viral RNA-dependent RNA polymerase (RdRp) jumps between similar sequences in the 3'-proximal  
58 region of the genome and the 5' UTR, known as body and leader transcription regulatory sequences  
59 (TRSs), respectively<sup>5,10</sup>. These sgRNAs are 5'- and 3'-co-terminal and are translated to express the  
60 structural proteins encoded towards the 3' end of the genome<sup>5,10</sup>. The 5'-proximal two thirds of the  
61 genome contains two long ORFs, ORF1a and ORF1b, with a –1 programmed ribosomal frameshift  
62 (PRF) site present at the overlap of the two ORFs<sup>11,12</sup>. Ribosomes that frameshift at this site synthesise  
63 polyprotein (pp)1ab, while the remainder synthesise pp1a, both of which are cleaved by viral proteases  
64 into several non-structural proteins (nsps)<sup>5,13</sup>. The proteins encoded by ORF1b include the RdRp and  
65 the helicase, and frameshifting at this site is thought to set the stoichiometry of these proteins relative  
66 to those encoded by ORF1a, a prevalent expression strategy in the *Nidovirales* order<sup>14</sup>.

67 Canonical  $-1$  PRF signals are characterised by two main features, a heptanucleotide “slippery”  
68 sequence (SS) which permits re-pairing of the codon:anticodon duplex in the new reading frame,  
69 separated by a 5–9 nucleotides (nt) spacer from a downstream RNA structure, often a pseudoknot. This  
70 is thought to present a “roadblock” which impedes ribosome processivity over the slippery sequence  
71 and stimulates frameshifting<sup>15–20</sup>. In the PRRSV genome, the ORF1ab frameshift signal comprises a  
72 U\_UUA\_AAC slippery sequence (where underscores delineate codons in the 0 frame) and a pseudoknot  
73 beginning 5 nt downstream<sup>11,12</sup>. The efficiency of  $-1$  PRF at the PRRSV ORF1ab site has not been  
74 measured in the context of infection, but is thought to be around 15–20% based on assays using reporter  
75 constructs<sup>21,22</sup>.

76 Recently, the region of the PRRSV genome encoding nsp2 was found to contain a second PRF signal  
77 (Figure 1A, inset, WT), conserved in all known arteriviruses except equine arteritis virus (EAV) and  
78 wobbly possum disease virus (WPDV)<sup>23–26</sup>. This PRF signal is unusual in that it stimulates both  $-1$  and  
79  $-2$  PRF, enabling production of three variants of nsp2 and rendering it the first example of efficient  $-2$   
80 PRF in a eukaryotic system<sup>23,24</sup>. These three proteins share the N-terminal two-thirds of nsp2 (the 0-  
81 frame product), which encodes a papain-like protease (PLP) 2 domain – an ovarian tumour domain  
82 (OTU) superfamily protease with deubiquitinase (DUB) and deISGylase activity<sup>27–32</sup>. This has an  
83 immune antagonistic effect, and interferon (IFN)- $\beta$  signalling inhibition has been demonstrated for all  
84 three variants of nsp2, most strongly for the frameshift products<sup>32</sup>. After the PRF site, nsp2 contains a  
85 multi-spanning transmembrane (TM) domain, thought to promote formation of double-membrane  
86 vesicles (DMVs) in the peri-nuclear region and anchor nsp2 to these membranes<sup>33–35</sup>. Ribosomes which  
87 undergo  $-2$  PRF at this site translate 169 codons in the  $-2$  frame to produce nsp2TF. This contains an  
88 alternative putative multi-spanning TM domain, thought to be responsible for targeting nsp2TF to the  
89 exocytic pathway, where it deubiquitinates the PRRSV structural proteins GP5 and M, preventing their  
90 degradation<sup>23,36</sup>. Nsp2N, the product of  $-1$  PRF, is a truncated form of nsp2, which is generated  
91 following termination of translation at a  $-1$ -frame stop codon immediately downstream of the slippery  
92 sequence, and is predicted to be cytosolic<sup>23,24</sup>.



93 A second unique feature of the nsp2 PRF site is its non-canonical nature. Rather than an RNA secondary  
94 structure, the stimulatory element is a complex of a cellular protein, poly(rC) binding protein (PCBP),  
95 and the viral protein nsp1 $\beta$ , bound at a C-rich motif (CCCANCUCC) located 10 nt downstream of the  
96 slippery sequence (G\_GUU\_UUU)<sup>23–26</sup>. How binding of this motif by the protein complex stimulates  
97 PRF is uncertain, but it may act as a roadblock analogous to the RNA structures of canonical PRF<sup>24–</sup>  
98 <sup>26,37</sup>. In contrast to RNA structure-directed PRF sites, which are commonly assumed to operate at a fixed  
99 efficiency, the *trans*-acting mechanism of PRF stimulation at the nsp2 site presents a potential  
100 mechanism for temporal regulation, as observed for coronaviruses – the only other known example of  
101 protein-stimulated PRF<sup>38–43</sup>. Frameshift efficiency in EU PRRSV-infected MARC-145 cells at 24 hpi  
102 was calculated as 20% for –2 PRF and 7% for –1 PRF<sup>23</sup>, however this has not been measured over a  
103 timecourse of infection.

104 In recent years, both low- and high-throughput studies of nidoviruses have highlighted considerably  
105 greater complexity in both the transcriptome and translome than is captured solely by the canonical  
106 transcripts and ORFs<sup>12,44–51</sup>. Here, we use ribosome profiling (RiboSeq), a deep-sequencing-based  
107 technique which generates a global snapshot of ongoing translation<sup>52</sup>, in parallel with RNASeq, to probe  
108 viral and host gene expression over a timecourse of PRRSV infection. Host differential gene expression  
109 analysis revealed that many of the transcriptional changes upon infection were counteracted by  
110 reductions in translation efficiency, indicating a dampened host response, and highlighting the  
111 importance of looking beyond transcription when analysing gene expression. On the viral genome, our  
112 studies reveal for the first time, a significant increase in frameshift efficiency over the course of  
113 infection at the nsp2 –2 PRF site, highlighting arteriviruses as the second example of temporally  
114 regulated frameshifting during infection. In addition, we identify several novel viral ORFs, including a  
115 highly expressed upstream ORF (uORF), the presence of which is conserved amongst NA PRRSV  
116 isolates. In both species of PRRSV, related non-canonical sgRNAs overlapping ORF1b were identified  
117 and characterised. These likely facilitate the expression of several of the novel ORFs which overlap  
118 ORF1b, and the observation of increased ribosome density in the 3'-proximal region of ORF1b suggests

119 they may also function to temporally regulate expression of the 3' region of ORF1b itself. This first  
120 application of RiboSeq to an arterivirus uncovers hidden layers of complexity in PRRSV gene  
121 expression that have implications for other important viruses.

## 122 **Results**

### 123 **Viral transcription and translation over a timecourse of infection**

124 PRRSV gene expression was investigated using three viruses: an EU PRRSV isolate based on the  
125 Porcilis® vaccine strain (MSD Animal Health; GenBank accession OK635576), NA PRRSV SD95-21  
126 (GenBank accession KC469618.1), and a previously characterised mutant variant (NA PRRSV SD95-  
127 21 KO2) which bears silent mutations in the nsp2 PRF site slippery sequence and C-rich motif rendering  
128 it unable to bind PCBP, induce -1 or -2 PRF, or produce nsp2N or nsp2TF (Figure 1A, inset)<sup>23-25,32</sup>.  
129 MA-104 cells (*Chlorocebus sabaesus*) were infected with EU PRRSV at a multiplicity of infection  
130 (MOI) of ~1-3 and harvested at 8 hours post-infection (hpi) following a two-minute pre-treatment with  
131 the translation elongation inhibitor, cycloheximide (CHX). MARC-145 cells (a cell line derived from  
132 MA-104) were infected with NA PRRSV (WT or KO2 mutant) at MOI 5 or mock-infected and  
133 harvested at 3, 6, 9 or 12 hpi by flash-freezing without CHX pre-treatment. Cell lysates were used for  
134 ribosome profiling, in which RNase I was added to digest unprotected regions of RNA and ribosomes  
135 were purified to isolate ribosome-protected fragments (RPFs) of RNA (Figure 1B). In parallel, aliquots  
136 of the same lysates were subjected to alkaline hydrolysis to generate fragments of RNA for RNASeq.  
137 Amplicons were prepared, deep sequenced and reads aligned to host (*C. sabaesus*) and viral genomes  
138 (Supplementary Table 2) to characterise the transcriptome and translome of infected cells.

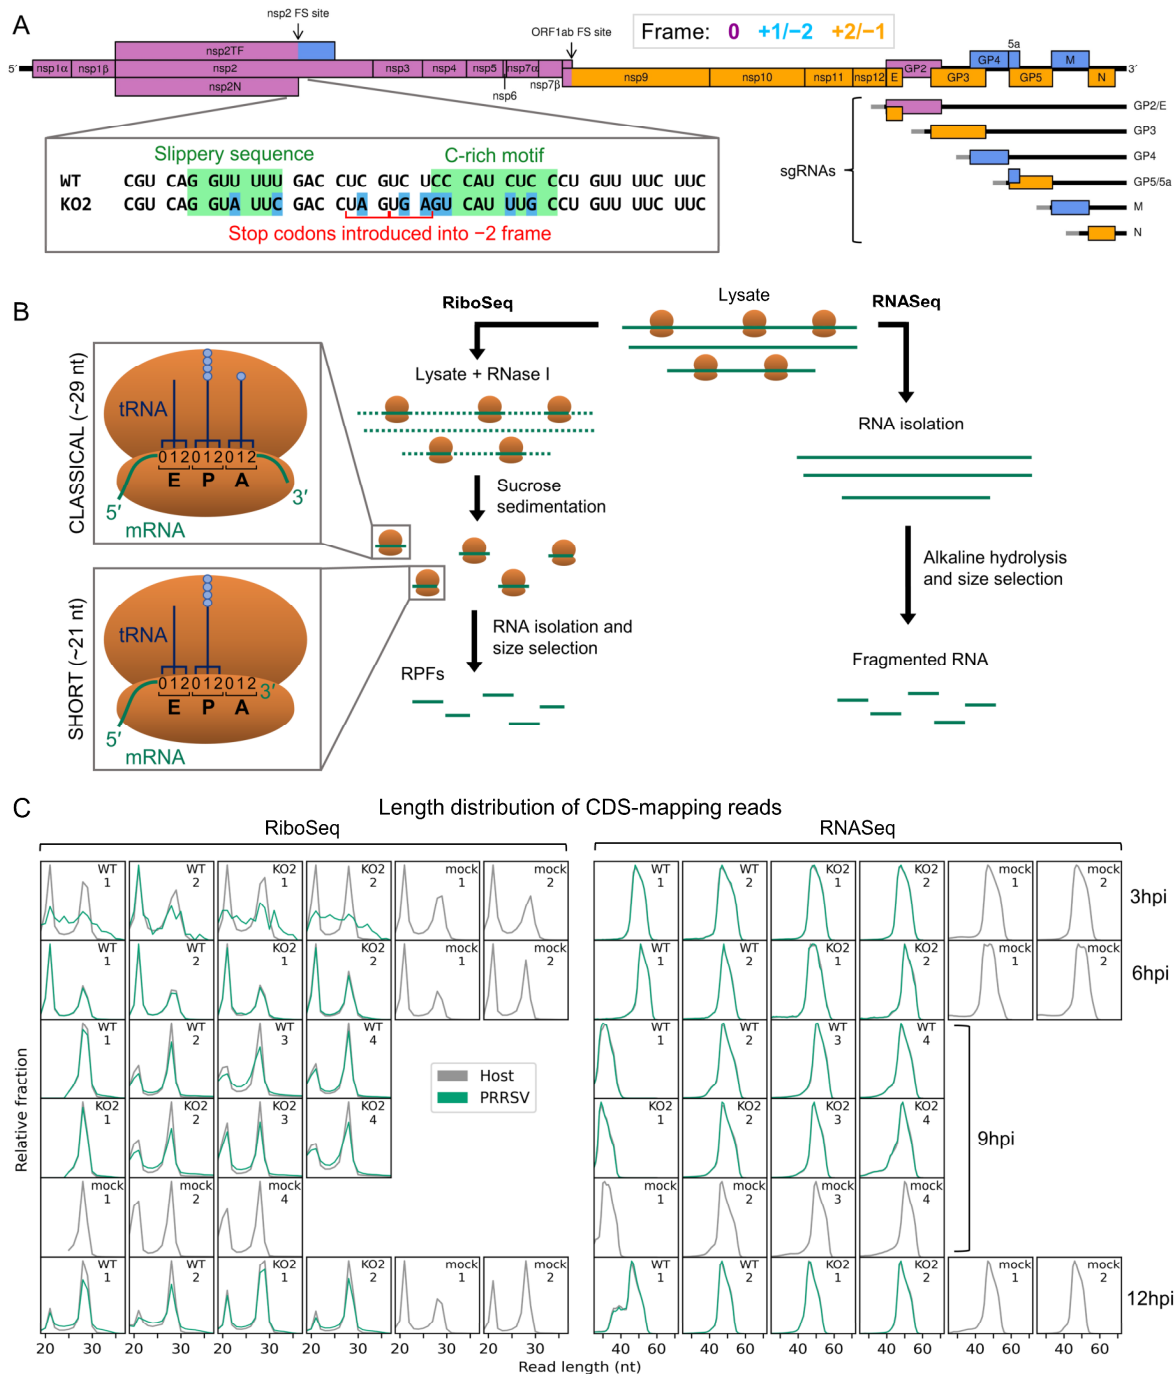

139

140 **Figure 1. An overview of the experimental set-up and the quality of the datasets.**

141 **A) Main:** Genome map of NA PRRSV (isolate SD95-21, GenBank accession KC469618.1).  
 142 ORFs are coloured and offset on the y axis according to their frame relative to ORF1a (0: purple,  
 143 no offset; +1/-2: blue, above axis; +2/-1: yellow, below axis). Subgenomic RNAs are shown  
 144 beneath the full-length genomic RNA, with the region of 5' UTR that is identical to the genomic  
 145 5' UTR shown in grey (known as the "leader"). ORFs translated from each sgRNA are depicted  
 146 as coloured boxes and named to the right. **Inset:** Nucleotide sequence at the nsp2 PRF site of the  
 147 NA PRRSV viruses used in this study (SD95-21). Mutations made to disrupt PRF and/or  
 148 expression of nsp2TF in the KO2 mutant virus are highlighted in blue. All mutations are  
 149 synonymous with respect to the ORF1a amino acid sequence. **B) Main:** Key experimental steps

150 in preparation of RiboSeq libraries (left) and parallel RNASeq libraries (right). **Insets:**  
151 Schematics of ribosomes protecting classical length RPFs (A site occupied) and short RPFs (A  
152 site unoccupied), with numbers within the decoding centre indicating nucleotide positions within  
153 codons. C) Length distribution of positive-sense RiboSeq (left) and RNASeq (right) reads  
154 mapping within host (grey) or viral (green, mock excluded) CDSs in replicate libraries. For 9 hpi  
155 replicate 1 samples (RiboSeq and RNASeq), fragments of 25–34 nt were size-selected during the  
156 library preparation; for all other samples the minimum length selected for was 19 nt for RiboSeq  
157 and ~45 nt for RNASeq. Note that the RiboSeq library 9 hpi mock replicate three was discarded  
158 due to poor quality.

159 Quality control analyses were performed as previously described<sup>49</sup> (Figure 1C, Supplementary Figures  
160 1–6). The length distribution of CDS-mapping RPFs is observed to peak at ~21 nt (where fragments of  
161 this length were purified) and at ~29 nt, with RPFs of these lengths thought to originate from,  
162 respectively, ribosomes with an empty A site or an A site occupied by aminoacyl-tRNA (Figure 1B,  
163 insets, Figure 1C, Supplementary Figure 6A)<sup>52–56</sup>. Interestingly, the proportion of “short” (19–24 nt)  
164 RPFs is significantly lower in the NA PRRSV-infected libraries than mock libraries at late timepoints  
165 (9 and 12 hpi grouped;  $p = 0.03$  – see Methods), a phenotype that in yeast cells has been attributed to  
166 stress-induced phosphorylation of eukaryotic elongation factor (eEF) 2, leading to global inhibition of  
167 translation elongation<sup>55</sup>. The predominant distance between the 5' end of an RPF and the P site of the  
168 ribosome is 12 nt in these datasets (Supplementary Figure 1, Supplementary Figure 6B), resulting in  
169 CDS-mapping RiboSeq reads showing clear triplet periodicity, known as “phasing”, with the majority  
170 of RPF 5' ends mapping to the first position within the codon, known as phase 0 (Supplementary Figure  
171 1, Supplementary Figure 2, Supplementary Figure 6B and C). Together with the observed characteristic  
172 length distribution (Figure 1C, Supplementary Figure 6A), this indicates that a high proportion of these  
173 reads are genuine RPFs. In contrast, the length and 5' end position of RNASeq reads is determined by  
174 alkaline hydrolysis and size selection, leading to a broader length distribution (Figure 1C,  
175 Supplementary Figure 6A) and lack of a clearly dominant phase (Supplementary Figure 1,  
176 Supplementary Figure 2, Supplementary Figure 6B and C). Virus CDS-mapping reads show a similar  
177 profile to host CDS-mapping reads (Figure 1C, Supplementary Figure 2, Supplementary Figure 6A and  
178 C), with the exception of 3 hpi NA PRRSV RiboSeq libraries, in which the background level of non-  
179 RPF contamination in the virus-mapping fraction appears to be high relative to the proportion of genuine  
180 RPFs, likely due to the low levels of viral translation at this timepoint. These libraries are therefore

181 excluded from all analyses except those in Figure 2D-F and Supplementary Figure 9A, where they  
182 provide an upper bound. The subtle flattening of the length distribution and phase composition of virus-  
183 mapping reads compared to host-mapping reads in some NA PRRSV RiboSeq libraries at late  
184 timepoints (Figure 1C, Supplementary Figure 2) suggests that a small proportion of viral reads originate  
185 from non-RPF sources, such as protection from RNase I digestion by viral ribonucleoprotein (RNP)  
186 complex formation. This non-RPF fraction of the library (henceforth referred to as RNP contamination  
187 although it could originate from several sources) is predominantly noticeable among reads mapping to  
188 the ORF1b region of the viral genome (Supplementary Figures 3 and 4), where the read depth from  
189 genuine translation is lowest. RiboSeq read lengths for which a high proportion of reads map to phase  
190 0 were inferred to be least likely to have a high proportion of RNP contamination (Supplementary  
191 Figure 4), and were selected for all NA PRRSV RiboSeq analyses henceforth, unless specified. RNP  
192 contamination is not a relevant concern for RNASeq libraries (as proteins are enzymatically digested  
193 before RNA purification) and it does not noticeably affect the EU PRRSV RiboSeq libraries, nor RPFs  
194 mapping to the host transcriptome (Supplementary Figures 5 and 6). Overall, we inferred that these  
195 datasets have a high proportion of RiboSeq reads representing genuine RPFs, and where RNP  
196 contamination is evident in lowly translated regions of the viral genome its effects will likely be  
197 ameliorated by stratification of read lengths.

198 Having confirmed data quality, we moved on to analyse virus replication over the timecourse by plotting  
199 RNASeq and RiboSeq read densities at each position on the viral genome (Figure 2, Figure 3,  
200 Supplementary Figures 7 and 8). RNASeq plots revealed a predictable pattern of PRRSV replication  
201 and transcription, with low read levels at 3 hpi, likely corresponding to input genomes, evidence for  
202 genome replication at 6 hpi, with the appearance of negative-sense reads (Figure 2, Supplementary  
203 Figure 7), and high-level synthesis of subgenomic mRNAs at later time points. The observed profile of  
204 general virus translation was also consistent with expectation. At 3 hpi (plot not shown), a small number  
205 of genuine RPFs were observed (see above) indicating that translation of the NA PRRSV genome is  
206 just beginning to reach the level detectable by RiboSeq under these conditions. At 6 hpi, translation of

207 ORF1ab is robustly detectable and comprises the majority of viral translation (Figure 2, Supplementary  
208 Figure 8; mean sgRNA:ORF1a RPF density ratio 0.08), consistent with the lack of significant sgRNA  
209 production at this timepoint. At 9 hpi, translation of sgRNAs dominates the landscape, and viral  
210 translation represents a sizeable proportion of ongoing translation in the cell (Figure 2, Supplementary  
211 Figure 8). Consistent with this, viral nsp1 $\beta$  expression at 9 hpi is clearly detectable by western blotting  
212 (Figure 3D and E) and other studies have shown robust expression of viral replicase proteins and viral  
213 RNA (vRNA) replication at this timepoint<sup>57,58</sup>. Positive-sense vRNA continues to accumulate between  
214 9 and 12 hpi, although accumulation of the negative-sense counterpart appears to reach a plateau, and  
215 at both timepoints, production and translation of sgRNAs is highly favoured over gRNA (Figure 2,  
216 Supplementary Figures 7 and 8). This likely represents a transition towards virion formation, for which  
217 the main components required are positive-sense gRNA and structural proteins, expressed from  
218 sgRNAs. At all timepoints, a large RiboSeq peak in the NA PRRSV 5' UTR is seen (Figure 2,  
219 Supplementary Figure 8), which results from translation of a novel upstream ORF (uORF), discussed  
220 below. With the exception of this highly expressed uORF, the transcriptional and translational profile  
221 of EU PRRSV at 8 hpi is similar to that of NA PRRSV at 9 hpi, although the production and translation  
222 of sgRNAs relative to ORF1a is slightly lower (Figure 2, Figure 3). In all RiboSeq libraries, we noted  
223 a variable proportion of negative-sense reads that mapped to the viral genome; however, they do not  
224 display the characteristic length distribution or phasing of genuine RPFs (Supplementary Figure 9),  
225 suggesting they originate from other sources (discussed above). They are therefore excluded from plots  
226 and analyses hereafter.



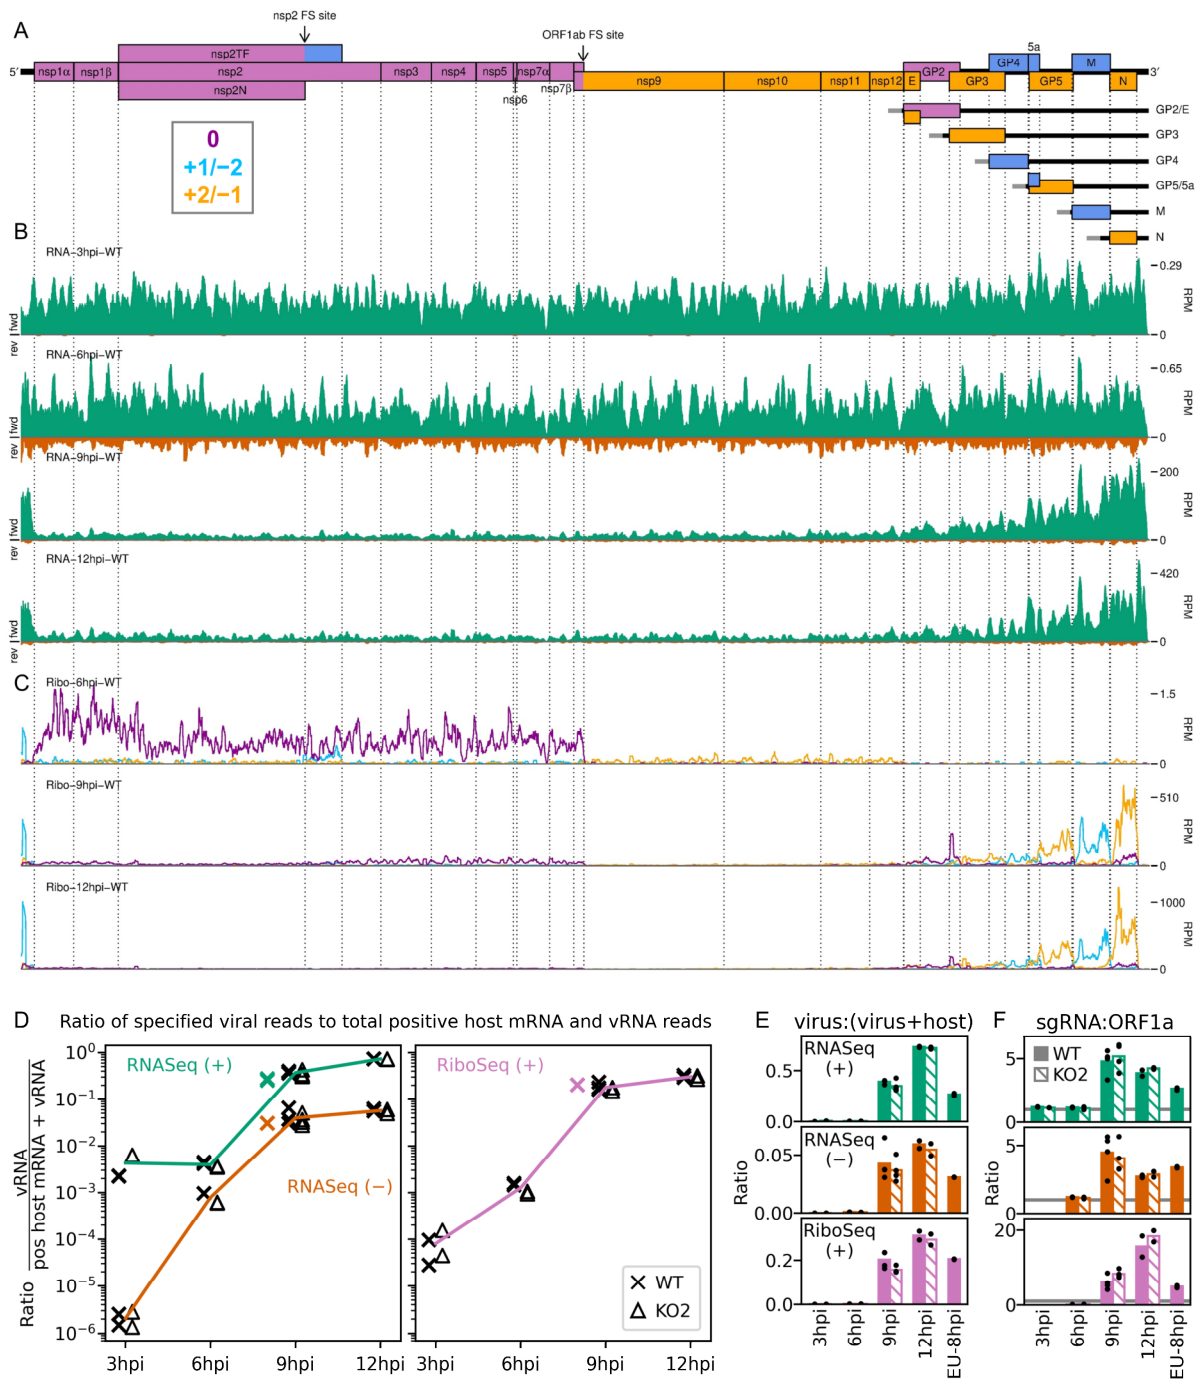

227

228 **Figure 2. An overview of viral transcription and translation over a timecourse of infection.**

229 **A)** Genome map of NA PRRSV, reproduced from Figure 1A. **B)** RNA-seq read densities in reads  
 230 per million mapped reads (RPM) on the WT viral genome, after application of a 45-nt running  
 231 mean filter, from cells harvested over a timecourse of 3–12 hpi. Positive-sense reads are plotted  
 232 in green (above the horizontal axis), negative-sense in orange (below the horizontal axis). The  
 233 WT libraries with the best Ribo-seq quality control results were selected for this plot (3 hpi  
 234 replicate one, 6 hpi replicate two, 9 hpi replicate four, 12 hpi replicate one), with further replicates  
 235 and KO2 libraries shown in Supplementary Figure 7. **C)** Ribo-seq read densities on the WT viral  
 236 genome from the counterpart libraries to B. Reads were separated according to phase (0: purple,

237 –2/+1: blue, –1/+2: yellow), and densities plotted after application of a 15-codon running mean  
 238 filter. Only read lengths identified as having minimal RNP contamination (indicated in  
 239 Supplementary Figure 4) were used to generate this plot. Further replicates and KO2 libraries are  
 240 shown in Supplementary Figure 8. **D**) Ratio of virus-mapping reads to [positive-sense host  
 241 mRNA- plus positive-sense vRNA-mapping reads]. Virus-mapping reads in the numerator were  
 242 split into the following categories: positive-sense RNASeq (green), negative-sense RNASeq  
 243 (orange), and positive-sense RiboSeq (purple). All read lengths were used. The line graphs  
 244 represent the mean ratios for each category for NA PRRSV, calculated from WT and KO2 data  
 245 combined. The individual datapoints are also plotted, with WT (cross) offset to the left and KO2  
 246 (triangle) offset to the right to aid visualisation. EU PRRSV (8 hpi) ratios are plotted as individual  
 247 datapoints represented by crosses in the category colour. The RiboSeq (+) 3 hpi timepoint is  
 248 plotted here to represent the upper limit of the NA PRRSV virus fraction at this timepoint as  
 249 quality control plots for this fraction of these libraries indicates that they do not contain a high  
 250 proportion of genuine RPFs, so the true ratio at this timepoint is likely lower. **E**) Data from D  
 251 represented on a linear scale. Here, data from WT (solid bars) and KO2 (hatched bars) are plotted  
 252 separately, and individual datapoints are plotted as black circles. **F**) Ratio of the density of  
 253 sgRNA-mapping reads to ORF1a-mapping reads. All read lengths were used, and densities were  
 254 calculated as reads per kilobase per million mapped reads (RPKM) of reads from each category  
 255 in E. Note that the nsp2 frameshift site and downstream region were excluded from the ORF1a  
 256 region (coordinates of both regions given in Supplementary Table 1). RiboSeq 3 hpi libraries  
 257 were excluded, and negative-sense RNASeq was omitted from the plot at 3 hpi due to the number  
 258 of reads being insufficient for robust assessment of the ratio. Categories arranged and plot  
 259 constructed as in E, with a grey line indicating a ratio of one.

260

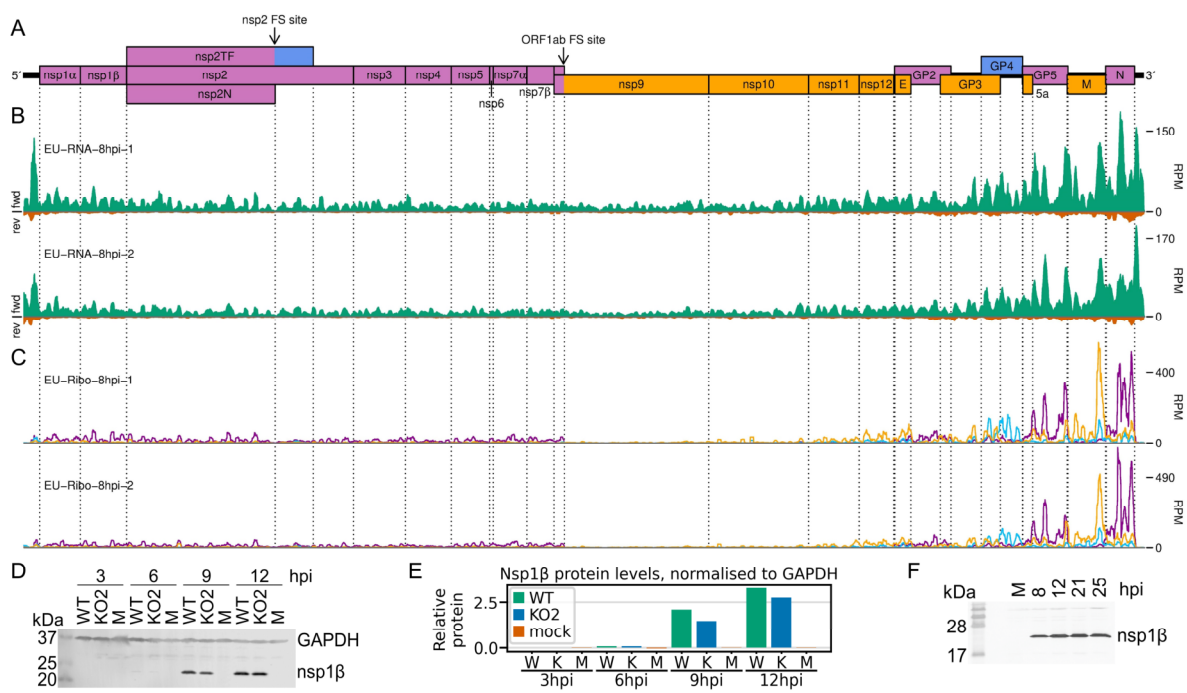

261

262 **Figure 3. Transcription and translation of the EU PRRSV genome and western blots of nsp1β.**

263 **A)** Genome map of the EU PRRSV strain used in this study (GenBank accession OK635576).  
 264 Genome map constructed as in Figure 1A, with subgenomic RNAs omitted for space  
 265 considerations. **B)** RNASeq read densities on the EU PRRSV genome. Plot constructed as in



266 Figure 2B. **C)** RiboSeq read densities on the EU PRRSV genome. Plot constructed as in Figure  
267 2C, except for the selection of read lengths to include – in this case, read lengths showing good  
268 phasing were selected for inclusion (indicated in Supplementary Figure 6D). **D)** Western blot of  
269 lysates used for NA PRRSV ribosome profiling (replicate one samples) with antibodies to viral  
270 protein nsp1 $\beta$  (23 kDa) and cellular protein GAPDH (36 kDa) as a loading control. **E)**  
271 Quantification of the western blot from panel D to determine the level of nsp1 $\beta$  relative to  
272 GAPDH. W = WT, K = KO2, M = mock. **F)** Western blot of nsp1 $\beta$  expression in MA-104 cells  
273 infected with EU PRRSV, harvested over a timecourse of 8–25 hpi. M = mock.

274

## 275 **Characterisation of the PRRSV transcriptome**

276 As described above, discontinuous transcription by the viral RdRp is an integral part of the nidoviral  
277 life cycle. Recent RNASeq studies have revealed considerable complexity in nidoviral transcriptomes  
278 beyond the canonical transcripts, including the discovery of numerous novel sgRNAs<sup>46–49,51,59</sup>. Thus far,  
279 only a handful of non-canonical transcripts have been discovered for PRRSV, through relatively low-  
280 throughput methods. Here, we characterise the PRRSV transcriptome in more detail by examining novel  
281 junctions in RNASeq reads aligned to the genome using STAR<sup>60</sup>. Borrowing terminology from the  
282 process of splicing (which is unrelated to discontinuous transcription), we refer to the 5'-most and 3'-  
283 most positions of the omitted region (where “5'-most” and “3'-most” refer to orientation with respect to  
284 the positive-sense genome) as, respectively, the “donor” and “acceptor” sites, and their joining site as  
285 the “junction”. Neighbouring junctions were merged to account for the potential ambiguity in assigning  
286 the exact junction site of discontinuous transcription events, and merged junctions were filtered to keep  
287 only those present in more than one replicate within each timepoint (where WT and KO2 were treated  
288 as equivalent) to generate one set of junctions per timepoint (Supplementary Tables 3–7; see Methods  
289 for details). Junctions for which the donor site spans the TRS (TRS-spanning) are expected to give rise  
290 to sgRNAs, while the remaining junctions (non-TRS-spanning) are herein termed “deletions” (unless  
291 specified).

292 Consistent with the trends identified in the general transcriptome analysis (Figure 2), junction-spanning  
293 reads attributed to sgRNAs do not pass the filters for detection at early timepoints, but are abundant at  
294 9 and 12 hpi, where they make up the vast majority of viral junction-spanning reads (Figure 4, Figure

295 5). Canonical sgRNAs are the most abundant transcripts, although reasonably abundant transcript  
296 variants are present, which differ only in the length of 5' UTR between the acceptor site and the CDS  
297 start, and are expected to produce the same protein. A study on another arterivirus, simian haemorrhagic  
298 fever virus (SHFV), suggests such transcripts may contribute to refining the overall stoichiometry of  
299 structural proteins<sup>45</sup>. For the N transcript, NA PRRSV isolates VR-2332 and tw91 have each been  
300 shown to have a (different) abundant secondary transcript variant<sup>12,61</sup>. Both of these are observed in our  
301 NA PRRSV dataset, although usage of the secondary body TRS found in VR-2332 (beginning at  
302 position 14,875 on the SD95-21 genome) was much more frequent than that of tw91, consistent with  
303 the fact that SD95-21 is more closely related to VR-2332. This more abundant secondary transcript,  
304 herein termed N-short, has a 5' UTR 114 nt shorter than that of the NA PRRSV primary transcript  
305 (herein termed N-long, with body TRS beginning at position 14,761), presenting a potential opportunity  
306 for differential translation regulation. If such regulation exists, it is unlikely to be temporal, as the ratio  
307 of N-long to N-short remains constant, at approximately 6:1, between 9 and 12 hpi. Any such regulation  
308 would also likely be isolate-dependent, as the N-short body TRS is not completely conserved amongst  
309 NA PRRSV isolates, and species-dependent, as the N-long body TRS is neither highly conserved nor  
310 highly utilised in EU PRRSV, for which N-short is ~60-fold more abundant than any other N transcript  
311 and its body TRS is absolutely conserved.

312 In addition to the numerous novel sgRNAs predicted to express full-length structural proteins, we found  
313 that most canonical sgRNAs have transcript variants with body TRSs downstream of the start codon,  
314 which are expected to express truncated forms of the structural proteins (Figure 4B, Figure 5). One of  
315 these was also observed for VR-2332 PRRSV: the “5-1” transcript variant<sup>12</sup>, which is thought to express  
316 a truncated form of GP5, and is present in our NA PRRSV dataset at ~1.7% of the abundance of the  
317 primary GP5 transcript (based on the number of junction-spanning reads at the donor site). Similar GP5  
318 transcript variants were observed in SHFV, and mutagenesis studies suggest that the truncated GP5 may  
319 be beneficial for viral fitness<sup>45</sup>, raising the possibility that the putative truncated forms of this and other  
320 PRRSV structural proteins could be functional.

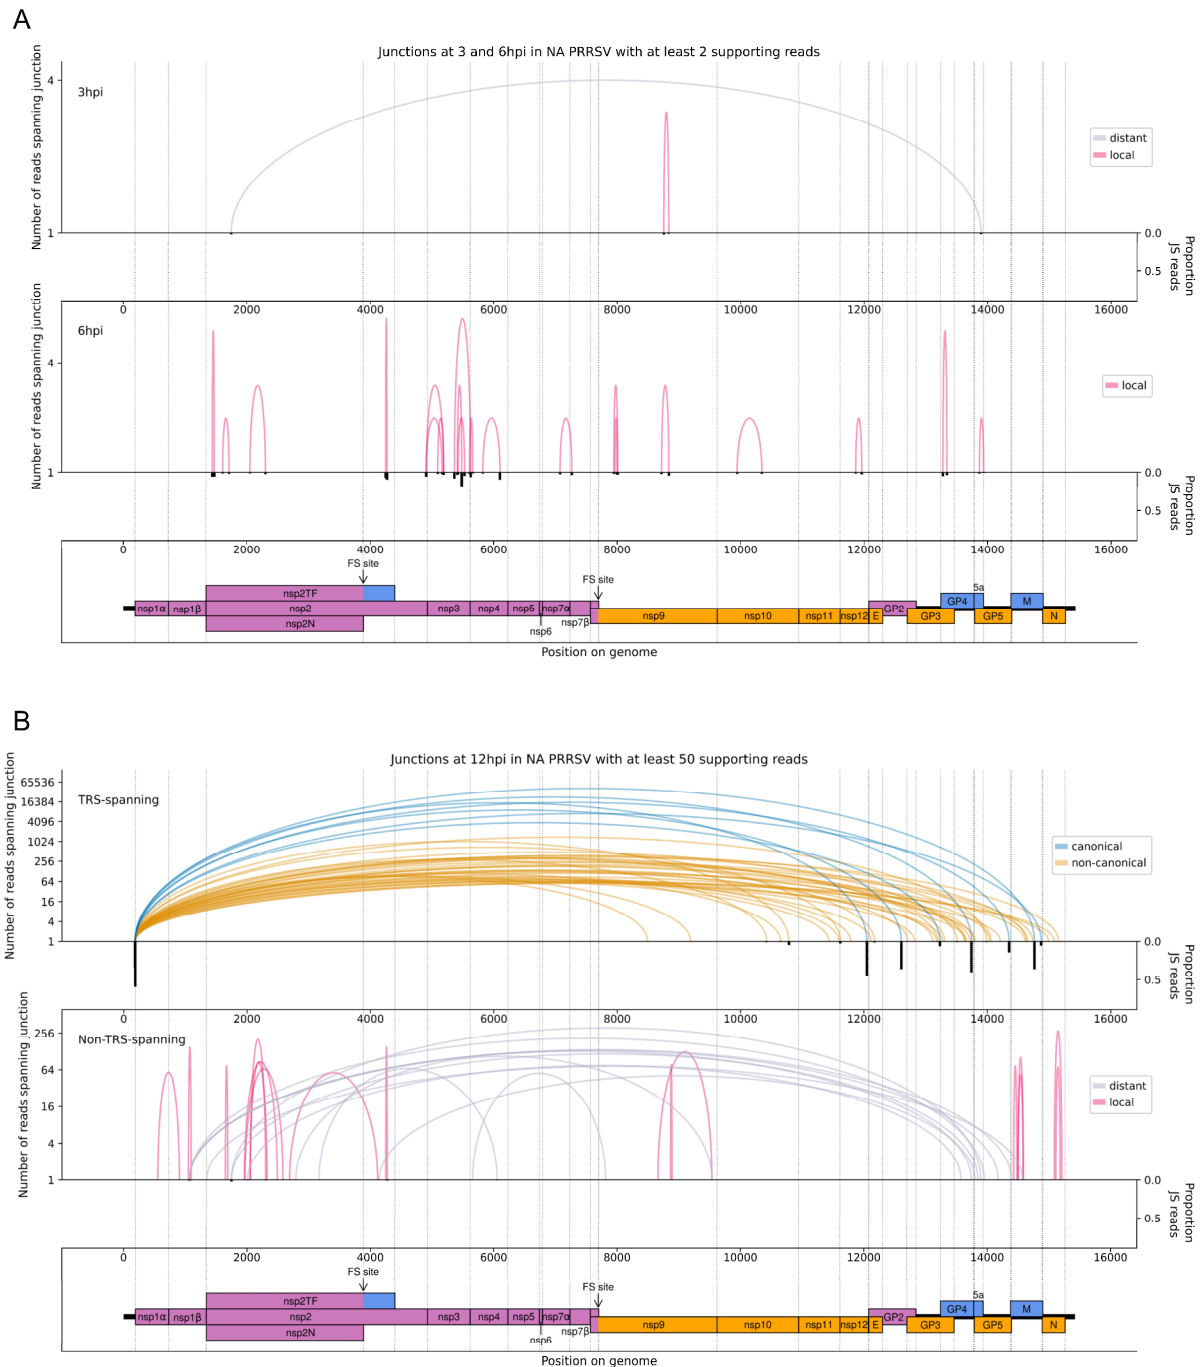

321  
322

**Figure 4. The NA PRRSV transcriptome at A) 3 and 6 hpi and B) 12 hpi.**

323  
324  
325  
326  
327  
328  
329  
330  
331

**A)** Sashimi plot of junctions in the NA PRRSV dataset at early timepoints during infection. The number of reads spanning each junction is indicated by the highest point of its arc (note the logarithmic scale of the y axis) and represents the total number of reads spanning the junction in all libraries from the specified timepoint combined. Only junctions for which this number is  $\geq 2$  are plotted. Beneath the sashimi plot is an inverted bar chart (black) of the proportion of reads at each donor and acceptor site that span the junction of interest, calculated as junction-spanning / (junction-spanning + continuously aligned to reference genome) and plotted on a linear scale (see Methods for details). A list of all junctions (from all timepoints) and their associated proportions of junction-spanning (JS) reads is shown in Supplementary Tables 3–7. At both timepoints, no

332 junctions where the donor site overlapped the leader TRS passed the minimum read-count  
333 threshold for plotting. Internal deletions, in which the donor site does not overlap the leader TRS,  
334 are coloured according to whether the deletion is distant ( $> 2000$  nt deleted, grey) or local ( $\leq 2000$   
335 nt deleted, red). **B) Upper:** Sashimi plot of junctions for which the donor site overlaps the leader  
336 TRS, with the major junction for each canonical sgRNA shown in blue (including both N-long  
337 and N-short for the N sgRNA), and other junctions (“non-canonical”) shown in orange. Both  
338 upper and lower panels were constructed as in panel A except that the threshold for inclusion of  
339 junctions was adjusted to  $\geq 50$  supporting reads. **Lower:** Sashimi plot of junctions representing  
340 internal deletions.

341

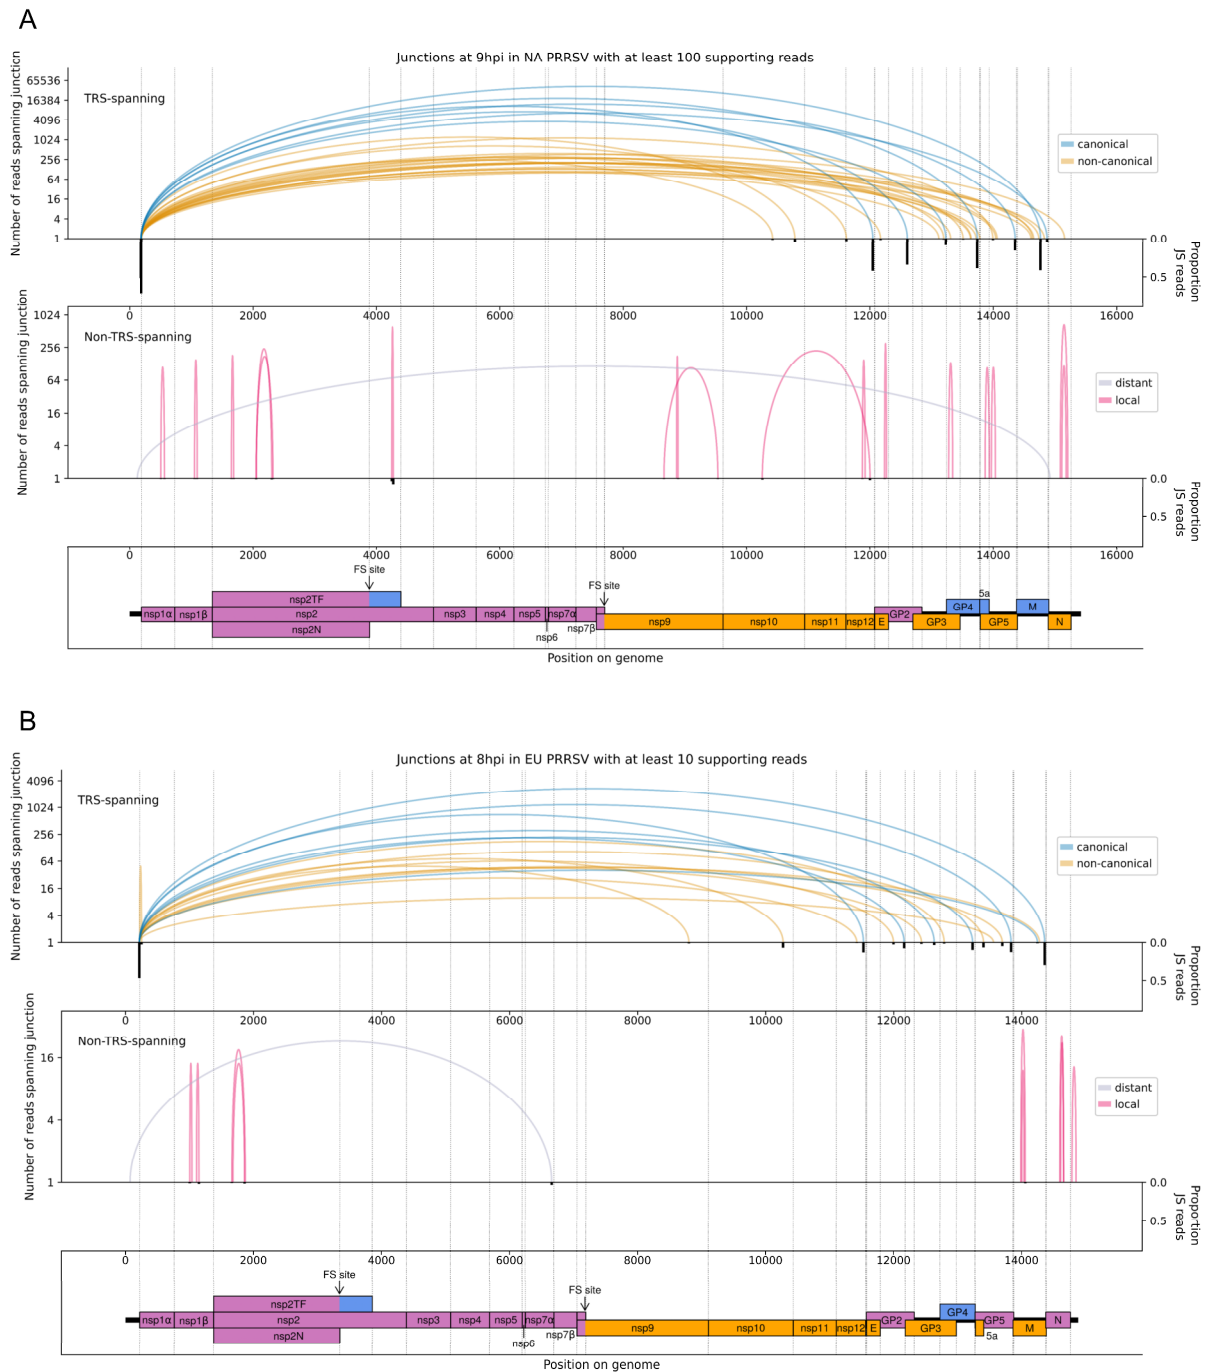

342  
343

**Figure 5. The NA and EU PRRSV transcriptomes at 9 and 8 hpi, respectively.**

344 **A)** Sashimi plots of junctions for NA PRRSV at 9 hpi. Plots constructed as in Figure 4B, but with  
 345 the threshold for inclusion of junctions adjusted to  $\geq 100$  junction-spanning reads in total from  
 346 all 9 hpi libraries (note that eight libraries were analysed at this timepoint compared to four at  
 347 other timepoints). **B)** Sashimi plots of junctions for EU PRRSV at 8 hpi. Plots constructed as in  
 348 Figure 4B, but with the threshold for inclusion of junctions adjusted to  $\geq 10$  supporting reads  
 349 (note that only two libraries were analysed and shorter read lengths are expected to lead to fewer  
 350 identifiably junction-spanning reads).

351 In addition to the transcript variants for the structural proteins, a small number of non-canonical  
352 sgRNAs were discovered in both NA and EU PRRSV which have acceptor sites within ORF1b, herein  
353 termed ORF1b sgRNAs (Figure 4B, Figure 5). This was unexpected as ORF1b is thought to be  
354 expressed only from gRNA, which is much less abundant than sgRNAs at late timepoints and is  
355 relatively inefficiently translated (see below). ORF1b sgRNAs, even of low abundance relative to  
356 canonical sgRNAs, could therefore have a significant effect on the expression of polyprotein products.  
357 This is explored further below.

358 Deletions, in which the leader TRS is not the donor site, tend to have fewer junction-spanning reads  
359 than sgRNAs, but nonetheless may influence gene expression. Many of these likely represent defective  
360 interfering (DI) RNAs; however, several of the long-range deletions in the NA PRRSV 12 hpi dataset  
361 bear similarity to “heteroclite” sgRNAs, a family of non-canonical transcripts found in several NA  
362 PRRSV isolates<sup>44,62</sup>. Heteroclite sgRNA formation is thought to be directed by short (2–12 nt) regions  
363 of similarity between the donor site, located within ORF1a, and the acceptor site, usually located within  
364 the ORFs encoding structural proteins<sup>44,62,63</sup>. These transcripts can be packaged into virions but, unlike  
365 classical DI RNAs, they do not appear to interfere with canonical gRNA or sgRNA production and are  
366 present in a wide range of conditions, including low MOI passage and samples directly isolated from  
367 the field<sup>44,62</sup>. In our datasets, the most abundant deletion at 12 hpi is identical to the junction that forms  
368 the “S-2” heteroclite sgRNA for VR-2332 PRRSV, from which a fusion of the first 520 amino acids of  
369 ORF1a (nsp1 $\alpha$ , nsp1 $\beta$  and part of nsp2) and the last 11 amino acids of 5a is thought to be expressed<sup>44,62</sup>.  
370 At 12 hpi, 2.3% of reads at the donor site span this junction, which indicates this is a relatively minor  
371 transcript relative to gRNA; however, this could be enough to affect gene expression, for example it is  
372 only ~5-fold lower than the corresponding percentage for the major GP4 junction, the canonical sgRNA  
373 with the fewest junction-spanning reads. Although this junction is not present above the limit of  
374 detection at 6 hpi, it is observed at 9 hpi (Supplementary Table 5; total read counts below the threshold  
375 for inclusion in Figure 5A) and at 3 hpi (Figure 4A, upper), consistent with this transcript being  
376 packaged into virions<sup>44,62</sup>. No transcripts resembling heteroclite sgRNAs were detected for EU PRRSV,

377 although it is possible such transcripts might be observed if a later timepoint was sampled and/or longer  
378 RNASeq inserts were generated, as the shorter read lengths purified for these libraries (and NA PRRSV  
379 9 hpi replicate one) are less amenable to detection of junctions.

380 The numerous novel transcripts described in this section not only present opportunities for regulation  
381 of the known PRRSV proteins, but also highlight considerable flexibility in the transcriptome, which  
382 provides a platform for expression of truncated protein variants and novel ORFs. Nonetheless, it is  
383 likely that many of the lowly abundant novel transcripts are simply an unavoidable consequence of a  
384 viral replication complex that has evolved to facilitate discontinuous transcription as an essential  
385 component of the viral life cycle.

### 386 **Characterising the PRRSV translome**

387 To characterise the viral translome, RiboSeq reads were mapped to the host and viral genomes using  
388 STAR, which formed the input for PRICE<sup>64</sup>. PRICE detected 14 novel NA PRRSV ORFs and eight  
389 novel EU PRRSV ORFs (Figure 6, Supplementary Figures 10 and 11, Supplementary Table 8). An  
390 additional NA PRRSV library, which had been harvested after CHX pre-treatment, was also inspected,  
391 as CHX pre-treatment may emphasise initiation peaks (albeit less efficiently than specific initiation  
392 inhibitors such as harringtonine)<sup>52,65</sup>. For NA PRRSV (Figure 6A), four of the novel ORFs overlap the  
393 ORFs encoding the structural proteins and may be expressed from the array of non-canonical sgRNAs  
394 discovered in this part of the genome. Most of the other novel ORFs overlap ORF1b and are likely  
395 expressed from the novel ORF1b sgRNAs described above, consistent with the fact that their translation  
396 is predominantly observed at late timepoints (Figure 6B, Supplementary Figure 10). Some of these  
397 ORFs are highly translated – for example the 125-codon NA PRRSV nsp12-iORF is translated at a level  
398 similar to nsp12 at 12 hpi (Figure 6C). To test whether these novel ORFs in either virus are subject to  
399 purifying selection (an indicator of functionality), we analysed synonymous site conservation within  
400 the known functional viral ORFs (Figure 6A and Supplementary Figure 11A). Overlapping functional  
401 elements are expected to place additional constraints on evolution at synonymous sites, leading to local



402 peaks in synonymous site conservation. While such peaks were observed in the regions where the  
403 known viral ORFs overlap (and also within the M ORF and at the 5' end of ORF1a), no large  
404 conservation peaks were observed in the vicinity of the novel, translated overlapping ORFs, indicating  
405 their functional relevance is debatable.

406 As mentioned earlier, we also identified a uORF in the NA PRRSV 5' UTR (Figure 6D), which is highly  
407 expressed at all timepoints (Figure 2C, blue peak). At only ten amino acids, the peptide expressed from  
408 this uORF is unlikely to be functional, and the ORF is truncated or extended in a small proportion of  
409 isolates (Figure 6E). However, the presence of a uORF in this position is highly conserved in NA  
410 PRRSV (Figure 6E–G), with the initiator AUG conserved in 558/564 available sequences, and  
411 relatively efficient<sup>66</sup> non-canonical initiation codons (GUG, AUA or ACG) in the remainder. This  
412 suggests the uORF may have advantages for viral fitness, for example by modulating translation of  
413 other ORFs.



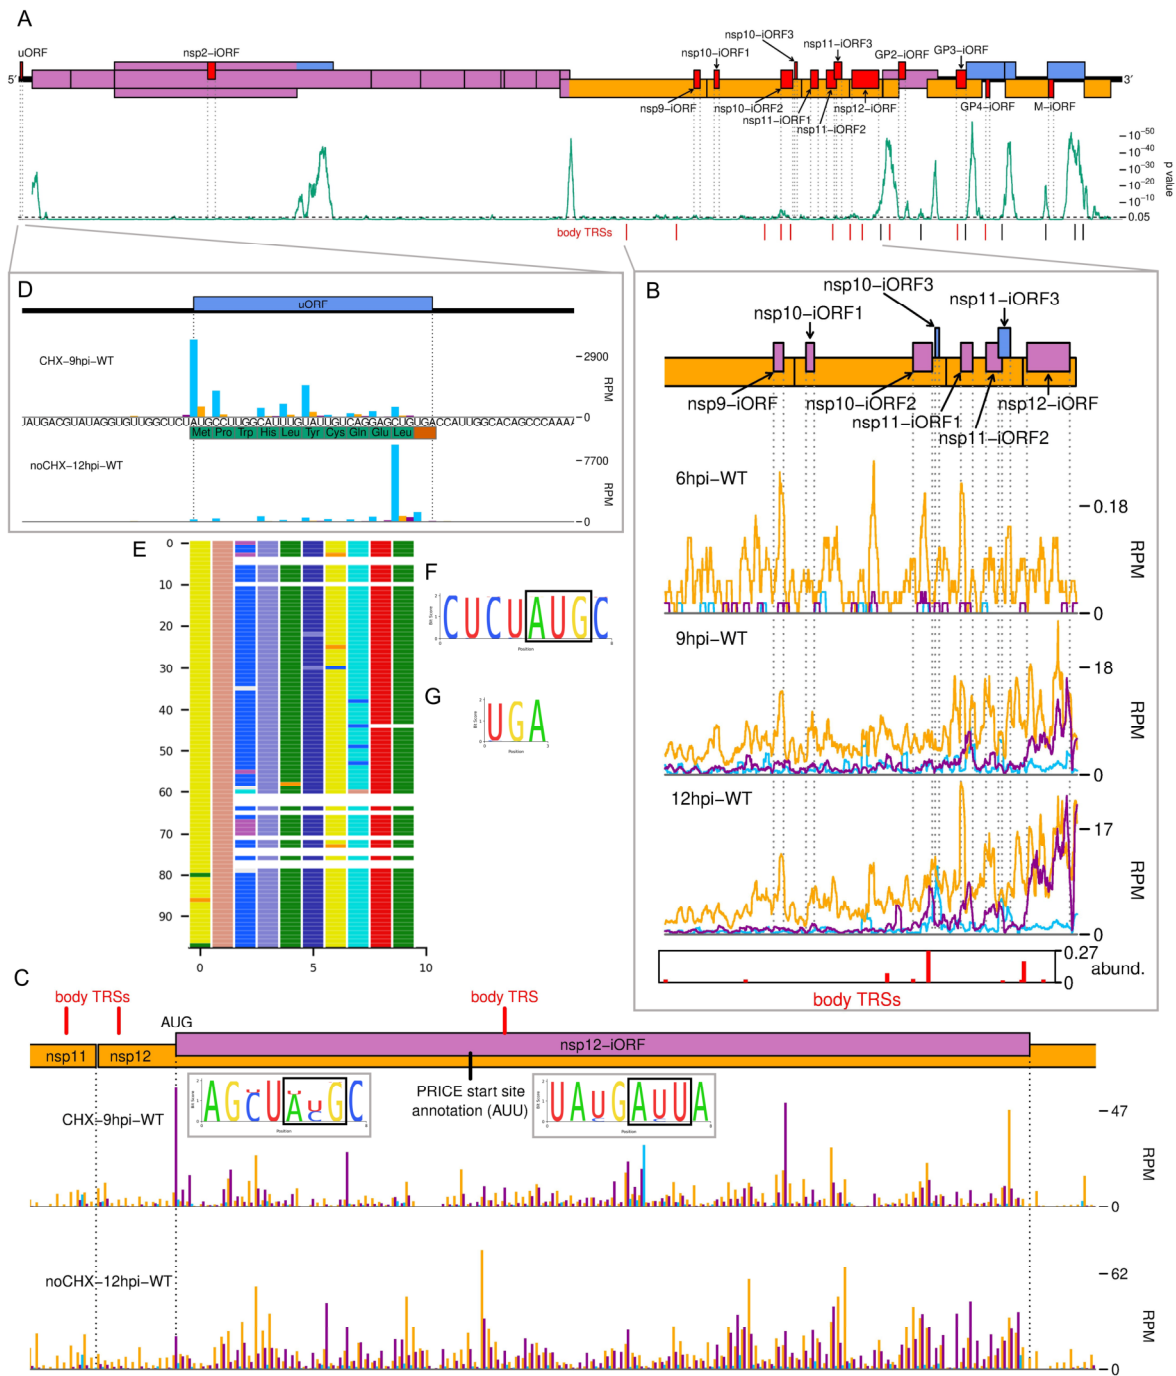

414

415 **Figure 6. The NA PRRSV translome.**

416 **A)** Locations of novel ORFs in the NA PRRSV genome. The genome map of canonical ORFs is  
 417 reproduced, without labels, and novel ORFs identified by PRICE are overlaid in red, offset on  
 418 the y axis according to frame relative to ORF1a. Below this is a SYNPLET2<sup>[67]</sup> analysis of  
 419 synonymous site conservation in the canonical protein-coding regions, based on 137 NA PRRSV  
 420 genomes representative of NA PRRSV diversity (see Methods). The green line represents the  
 421 probability (over a 25-codon sliding window) that the observed conservation could occur under  
 422 a null model of neutral evolution at synonymous sites; conservation peaks are indicative of  
 423 overlapping functional elements. Locations of selected body TRSs are indicated below, with  
 424 known body TRSs shown in black and novel body TRSs in red, displaying only the major body

425 TRSs for ORF1b sgRNAs and/or novel sgRNAs expected to facilitate expression of a novel ORF.  
426 **B)** Translation of novel ORFs overlapping ORF1b. Reads mapping to the NA PRRSV genome  
427 between the ORF1b sgRNA 1 body TRS and the end of ORF1b are shown, separated according  
428 to phase and plotted after application of a 15-codon running mean filter. Only read lengths  
429 identified as having minimal RNP contamination (indicated in Supplementary Figure 4) were  
430 used to generate this plot. Novel ORFs in this region are indicated on the genome map, coloured  
431 and offset according to frame relative to ORF1a. Positions of moderately frequently used body  
432 TRSs (at least 44 junction-spanning reads) are indicated by red bars at the bottom of the plot. The  
433 height of each red bar is scaled according to the number of junction-spanning reads for that body  
434 TRS (across all 12 hpi RNASeq libraries combined), relative to the canonical sgRNA with the  
435 fewest junction-spanning reads (GP4, major junction only). “abund.” = abundance (of junction-  
436 spanning reads relative to GP4). The libraries displayed are those in Figure 2C, with remaining  
437 replicates and KO2 libraries in Supplementary Figure 10. **C) Main:** RPF distribution on the  
438 region of the NA PRRSV genome predicted to contain nsp12-iORF. RPFs are coloured according  
439 to phase and plotted without application of a sliding window, using only read lengths identified  
440 as having minimal RNP contamination (indicated in Supplementary Figure 12F for CHX-9hpi-  
441 WT and Supplementary Figure 4 for noCHX-12hpi-WT, which is replicate one). The positions  
442 of body TRSs with  $\geq 50$  junction-spanning reads at 12 hpi are indicated by a red bar at the top of  
443 the genome map. The final initiation codon predicted by PRICE is an AUU codon, indicated by  
444 a black line. However, the observed RPF profiles are more consistent with the N-terminally  
445 extended ORF annotated in this plot, for which ribosomes would initiate at the upstream AUG,  
446 which was designated as the start site by PRICE for the “Candidate location” before application  
447 of start site selection algorithms (coordinates in Supplementary Table 8). **Insets:** Conservation of  
448 the context of the predicted nsp12-iORF initiation codon for the “Candidate location” (left) and  
449 final “Location” (right), based on 661 available sequences for full NA PRRSV genomes. The  
450 putative initiator codons are indicated by black boxes. **D)** Distribution of RPFs mapping to the  
451 region of the NA PRRSV 5' UTR containing the uORF. Plot constructed as in panel C, with the  
452 genome sequence in this region, and the uORF amino acid sequence, underlaid. Note that CHX  
453 pre-treated libraries typically have heightened initiation peaks, while libraries harvested without  
454 CHX pre-treatment have heightened termination peaks. **E)** Predicted amino acid sequences of the  
455 uORF from 98 PRRSV genomes representative of NA PRRSV diversity. The uORF CDS  
456 nucleotide sequence was extracted from a multiple sequence alignment and frame 0 was  
457 translated. Each row represents one sequence, with each coloured rectangle representing an amino  
458 acid (logo plots and alignment visualisations made using CIALign<sup>68</sup>). Gaps indicate translation is  
459 predicted to have terminated due to a stop codon. One sequence out of these 98 (KY348852) has  
460 a 28-codon extension to the ORF which is not depicted. **F and G)** Conservation of F) the initiation  
461 context and G) the stop codon for the NA PRRSV uORF, based on 661 NA PRRSV sequences.  
462 Sequences were filtered to take only those spanning the entire feature of interest with no gaps,  
463 leaving F) 564 and G) 598 sequences in the alignment used for the logo plots. The initiator AUG  
464 is indicated by a black box. The initiation context of this ORF is weak, as defined by the absence  
465 of a G at position +4 or a A/G at position -3 relative to the A of the AUG, but the sequence is  
466 highly conserved.

467

## 468 **Quantification of viral gene expression**

469 Next, we quantified viral transcription and translation to better understand PRRSV gene expression  
470 profiles and determine the contribution of the novel transcripts and ORFs. RiboSeq read density (in  
471 reads per kilobase per million mapped reads [RPKM]) was calculated using the PRICE output, and  
472 transcript abundance was quantified based on the number of junction-spanning reads (in RPM). ORFs  
473 were paired with the transcripts from which they are most likely expressed (Figure 7), and translation  
474 efficiency (TE) calculated as the RiboSeq read density divided by the transcript abundance. Although  
475 TE calculations can be confounded by factors such as differences in translation speed, such effects are  
476 expected to average out over longer regions such as whole ORFs. To facilitate this calculation for the  
477 uORF, “transcript abundance” for the 5' leader was determined as though this was a separate transcript  
478 (see Methods).

479 Consistent with the results shown in Figure 2, gRNA is by far the most abundant viral transcript at 6  
480 hpi, after which there is a marked shift towards sgRNA production at 9 hpi (Figure 8A and B,  
481 Supplementary Figure 13). Between 9 and 12 hpi, the proportion of gRNA increases slightly; however,  
482 this may be partly related to changes in abundance of heteroclitite sgRNAs, which are not discriminated  
483 from gRNA in this analysis, and are investigated separately below. The relative abundance of each  
484 sgRNA remains fairly stable between 9 and 12 hpi, consistent with findings for SHFV and MHV<sup>45,49</sup>,  
485 and non-canonical sgRNAs make up a relatively small proportion of the viral transcriptome. The results  
486 for negative-sense transcripts broadly mirror the positive-sense results, although negative-sense gRNA  
487 is proportionally more abundant (Figure 8A, Supplementary Figure 13). The overall transcriptional  
488 profile of EU PRRSV resembles that of NA PRRSV at 9 hpi, although gRNA is more abundant and  
489 there are some differences in the relative proportions of canonical sgRNAs (Figure 8A and B,  
490 Supplementary Figure 13).

491 Analysis of RiboSeq datasets revealed a similar trend to the RNASeq analysis of NA PRRSV, with  
492 ORF1a translation predominating at 6 hpi, while sgRNA translation dominates at 9 hpi (Figure 8C,

493 Supplementary Figure 14). ORF1a translation declines by 12 hpi, despite the increase in transcript  
494 abundance, perhaps representing the sequestration of gRNA through genome packaging, reducing the  
495 pool available for translation. Consistent with this, ORF1a, which has relatively low TE throughout  
496 infection, is the only canonical NA PRRSV ORF for which TE decreases over time, decreasing from  
497 ~20 at 6 and 9 hpi to 4.4 at 12 hpi (Supplementary Figure 15; explored in more detail below). Strikingly,  
498 the uORF is among the most highly translated NA PRRSV ORFs at all timepoints (Figure 8C,  
499 Supplementary Figure 14), although this may be somewhat inflated by the heightened termination peak  
500 having a proportionally greater effect on RPKM for a small ORF such as this. Its high expression at 6  
501 hpi indicates that the uORF is expressed from gRNA, as this is by far the most abundant viral transcript  
502 at this timepoint (Figure 8B). The increase in the ratio of uORF compared to ORF1a translation at later  
503 timepoints (Figure 8C, Supplementary Figure 14), when sgRNAs become abundant, suggests that the  
504 uORF is also translated from the sgRNAs. This is supported by the TE results (Supplementary Figure  
505 15), which show an increase in uORF TE between 9 and 12 hpi, and a concomitant increase in TE for  
506 all canonical sgRNA ORFs (except GP2 which remains stable), consistent with increased TE of  
507 sgRNAs affecting both the uORF and the main ORFs.

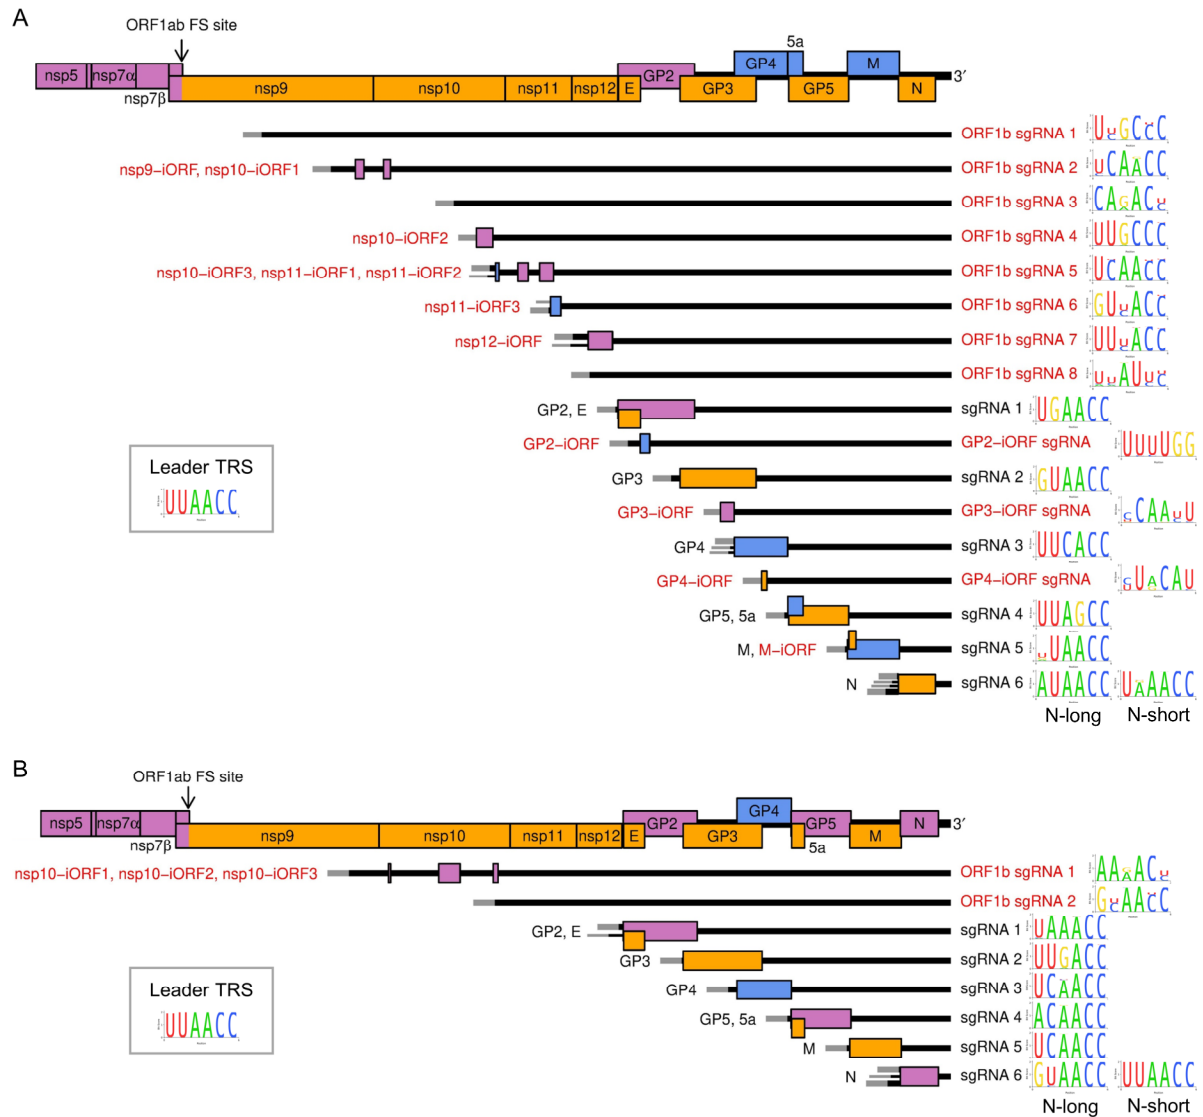

508

509 **Figure 7. Subgenomic mRNA transcripts and ORFs included in viral gene expression analysis of**  
 510 **A) NA PRRSV and B) EU PRRSV.**

511 Canonical transcripts and ORFs are labelled in black, novel ones in red. The genome map from  
 512 nsp5 onwards is reproduced above for comparison. The leader (grey) is treated as a separate  
 513 transcript for the purposes of these analyses, and the NA PRRSV uORF putatively expressed  
 514 from it was omitted from these plots for clarity. Where more than one 5' UTR is depicted for  
 515 some mRNAs this indicates that multiple merged junctions were detected that likely give rise to  
 516 transcripts from which the same ORF(s) are translated. In these cases, the alternative transcripts  
 517 were considered as one species in the gene expression analysis, and junction-spanning read counts  
 518 for the junctions were combined. To the right of each transcript, the consensus sequence of the  
 519 body TRS used to generate the major transcript variant (indicated by the thicker UTR) is plotted,  
 520 based on A) 661 NA PRRSV or B) 120 EU PRRSV genome sequences. For ease of identification,  
 521 both N-long and N-short are depicted as major transcripts for N. In addition to these sgRNAs and  
 522 ORFs, ORF1a and all novel ORFs not depicted here were included in the analysis and designated  
 523 as expressed from the gRNA transcript.

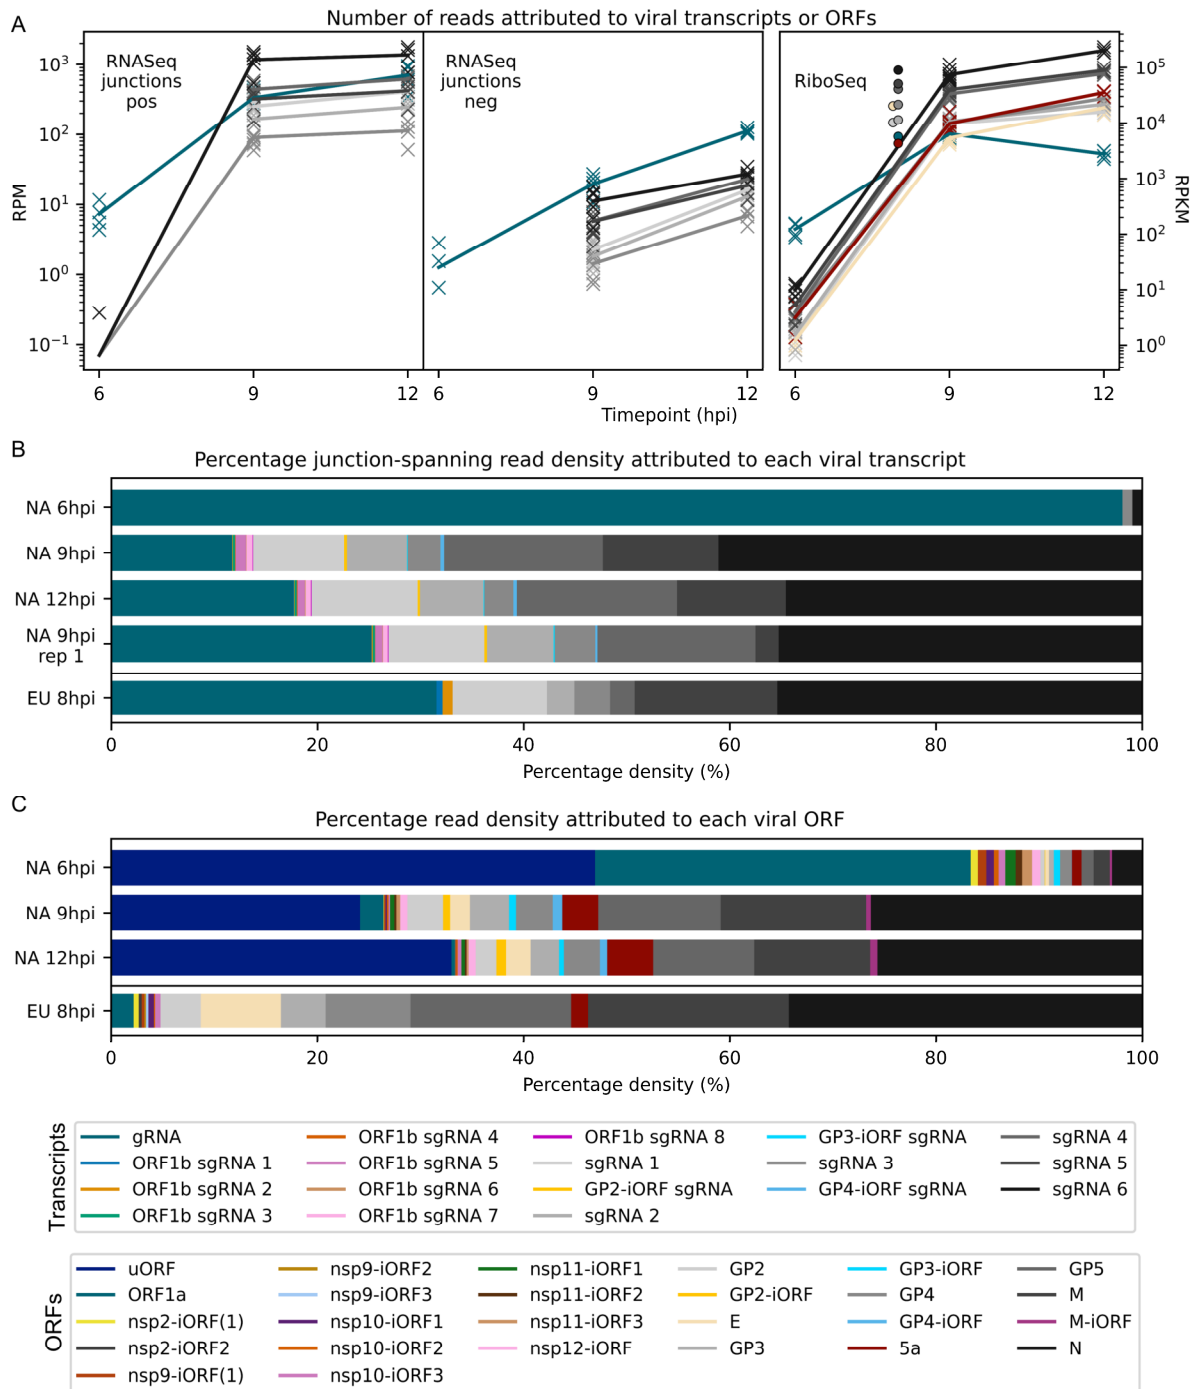

524

525 **Figure 8. Viral transcript abundance and total translation of viral ORFs.**

526 **A) Left:** Junction-spanning read density attributed to canonical viral transcripts. The left-most  
 527 panel shows the results for positive-sense reads (pos), with negative-sense reads (neg) on the  
 528 right. Mean values are indicated by the line graph, with individual data points plotted as crosses.  
 529 Note that, due to the shorter RNA fragment lengths selected for EU libraries and for NA 9 hpi  
 530 replicate one libraries, the junction-spanning read counts are not comparable to the remaining NA  
 531 PRRSV libraries. For all junction-spanning read analyses in which averages were taken, replicate  
 532 one libraries were excluded from the “9 hpi” group and analysed separately (in this case see  
 533 Supplementary Figure 13, for these and the EU PRRSV results). **Right:** RiboSeq read density



534 attributed to canonical viral ORFs, based on the PRICE read count values. Mean values for EU  
535 PRRSV are plotted as filled circles, with individual data points omitted for clarity and some  
536 circles offset on the x axis to aid visualisation. ORF1b is omitted from this and several other plots  
537 in this section, and investigated separately in Figure 9A-C. Investigation of variations in  
538 transcription and translation within ORF1a are given in Figure 9D; for all other analyses in this  
539 section, “ORF1a” refers to the region designated by PRICE, which begins at genomic coordinates  
540 2249 (NA) and 1212 (EU) and extends to the end of ORF1a. Similarly, “gRNA” transcript  
541 abundance is calculated ignoring the existence of putative heteroclitite sgRNAs, except for where  
542 this is investigated in Figure 9D. The legend for colours in all panels is displayed beneath panel  
543 C. **B)** Percentage of the viral transcriptome represented by each transcript. Transcript abundances  
544 (estimated from junction-spanning read RPM values) within each library were converted to a  
545 percentage of the total RPM of all transcripts plotted for that library. Mean percentages for each  
546 group were calculated, treating WT and KO2 as equivalent. The leader, which is treated as a  
547 separate transcript for future junction-spanning read analyses, was omitted from this percentage  
548 calculation. **C)** Percentage of the viral translome represented by each ORF. Plot constructed as  
549 in panel B, with percentages representing the RPKM value of each ORF (calculated from the  
550 PRICE output) as a proportion of the total sum of RPKM values of all ORFs plotted. Note that  
551 the novel ORFs detected on the EU PRRSV genome were named according to the same  
552 convention as for NA PRRSV novel ORFs, but equivalent names does not indicate that they are  
553 equivalent ORFs.

554 Except for the absence of a uORF, the relative translation levels of EU PRRSV ORFs are similar to  
555 those in NA PRRSV, although with less translation of 5a (Figure 8C, Supplementary Figure 14). This  
556 may reflect the different relative arrangements of GP5 and 5a for these two isolates, with 5a beginning  
557 5 nt downstream of the beginning of GP5 for EU PRRSV and 10 nt upstream for NA PRRSV. TE values  
558 for EU PRRSV are slightly higher than those for NA PRRSV (Supplementary Figure 15); however, this  
559 may be influenced by reduced accuracy of transcript abundance quantification due to the shorter read  
560 lengths of the EU libraries.

561 Novel ORFs make up a relatively small proportion of total viral translation (Figure 8C). Nonetheless,  
562 they may represent a significant contribution to the viral proteome – for example, the novel ORFs  
563 overlapping the end of ORF1b have a similar density of ribosomes as ORF1a at 12 hpi (Figure 8C,  
564 Supplementary Figure 14). These overlapping ORFs are not subject to noticeable purifying selection  
565 (Figure 6A, Supplementary Figure 11A), indicating they are unlikely to produce functional proteins.  
566 This raises the possibility that their translation is tolerated as a side effect of ORF1b sgRNA production,  
567 which may primarily function to regulate expression of ORF1b. This is supported by the observed step  
568 increases in ORF1b-phase RiboSeq density after some of the ORF1b sgRNA body TRSs at late  
569 timepoints (Figure 9A and B), a trend confirmed by quantification of this read density in the regions

570 between these body TRSs (Figure 9C). At 6 hpi, when no ORF1b sgRNAs are detected, read density  
571 remains reasonably constant throughout ORF1b, while at later timepoints, as ORF1b sgRNA expression  
572 increases, a pattern of increasing density towards the 3' end of ORF1b emerges, with the 3'-most regions  
573 more highly translated than ORF1a (Figure 9C). For NA PRRSV, the greatest step increases are  
574 observed after the ORF1b sgRNA 2, 5 and 7 body TRSs (Figure 9A and C) – the only non-canonical  
575 sgRNAs in Figure 7 which have just a single mismatch in the body TRS compared to the leader TRS.  
576 These body TRSs are also well-conserved, particularly the final two Cs, identified as the most highly  
577 conserved part of the canonical sgRNA body TRS consensus in this and other studies<sup>12,61</sup> (Figure 7).  
578 This raises the likelihood that such body TRSs may also produce ORF1b sgRNAs in other isolates of  
579 NA PRRSV. Furthermore, although the body TRSs for the EU PRRSV ORF1b sgRNAs are less well-  
580 conserved within the species (Figure 7), they are located at very similar positions on the genome  
581 compared to the NA PRRSV ORF1b sgRNA 2 and 5 body TRSs, which correlate with two of the  
582 greatest increases in ORF1b-phase RiboSeq read density for NA PRRSV. Indeed, the EU PRRSV  
583 ORF1b sgRNA 2 body TRS is in a genomic location exactly equivalent to that of NA PRRSV ORF1b  
584 sgRNA 5, and both body TRSs have only a single mismatch compared to the leader TRS, despite this  
585 not being a requirement for maintaining the amino acid identities at this position. The conservation of  
586 these features of ORF1b sgRNAs between these two highly divergent arterivirus species suggests there  
587 may be a selective advantage in their production, which could result from temporal modulation of the  
588 stoichiometry of nsps 10–12.

589 Similarly, the heteroclite sgRNAs have the potential to modulate the stoichiometry of ORF1a. To  
590 examine this, the RNASeq read density in ORF1ab was partitioned between gRNA and heteroclite  
591 sgRNAs (a distinction not made in the junction-spanning read analysis) using a “decumulation”  
592 procedure introduced in Irigoyen *et al.*<sup>49</sup>, and RiboSeq read density in three regions of ORF1a was  
593 determined (Figure 9D). NA PRRSV RiboSeq read density upstream of the major (S-2) heteroclite  
594 junction is considerably higher than in the downstream regions, with the highest ratio of  
595 heteroclite:ORF1a (before FS) translation being reached at 12 hpi, consistent with the increased ratio



596 of heteroclite:sgRNA RNASeq density at this timepoint (Figure 9D). This supports the hypothesis that  
597 the N-terminal region of ORF1a can be independently translated from heteroclite sgRNAs (besides from  
598 gRNA as part of pp1a/ab) during infection, which could function to increase the ratio of nsp1 $\alpha$  and  
599 nsp1 $\beta$  compared to the other nsps (Figure 9D). Consistent with the previous analysis (Supplementary  
600 Figure 15), the TE of ORF1a decreases over time for both regions upstream of the nsp2 PRF site (Figure  
601 9D). TE in the region after the PRF site does not follow the same trend, likely due to the unexpected  
602 increase in RiboSeq read density after the nsp2 frameshift site at 9 and 12 hpi. This is contrary to  
603 expectation, as ribosomal frameshifting into nsp2TF should decrease the ribosome density downstream  
604 of the nsp2TF stop codon. The reason for this is unclear; perhaps it is a consequence of expressed non-  
605 canonical transcripts below the threshold of detection, or biological and/or technical biases. Despite the  
606 absence of detectable EU PRRSV heteroclite sgRNAs in the junction-spanning read analysis (Figure  
607 5B), analogous calculations were performed to investigate heteroclite sgRNA and ORF1a expression  
608 in EU PRRSV (Figure 9D), revealing RNASeq and RiboSeq outcomes consistent with the presence of  
609 translated heteroclite sgRNAs (Figure 9D). These transcripts could potentially be present below the  
610 threshold of detection for the junction-spanning read analysis pipeline. Taken together, these results  
611 demonstrate that the non-canonical transcripts discovered in this study provide a potential mechanism  
612 to temporally regulate the stoichiometry of the polyprotein components, which may reflect changing  
613 requirements for the different non-structural proteins throughout infection.

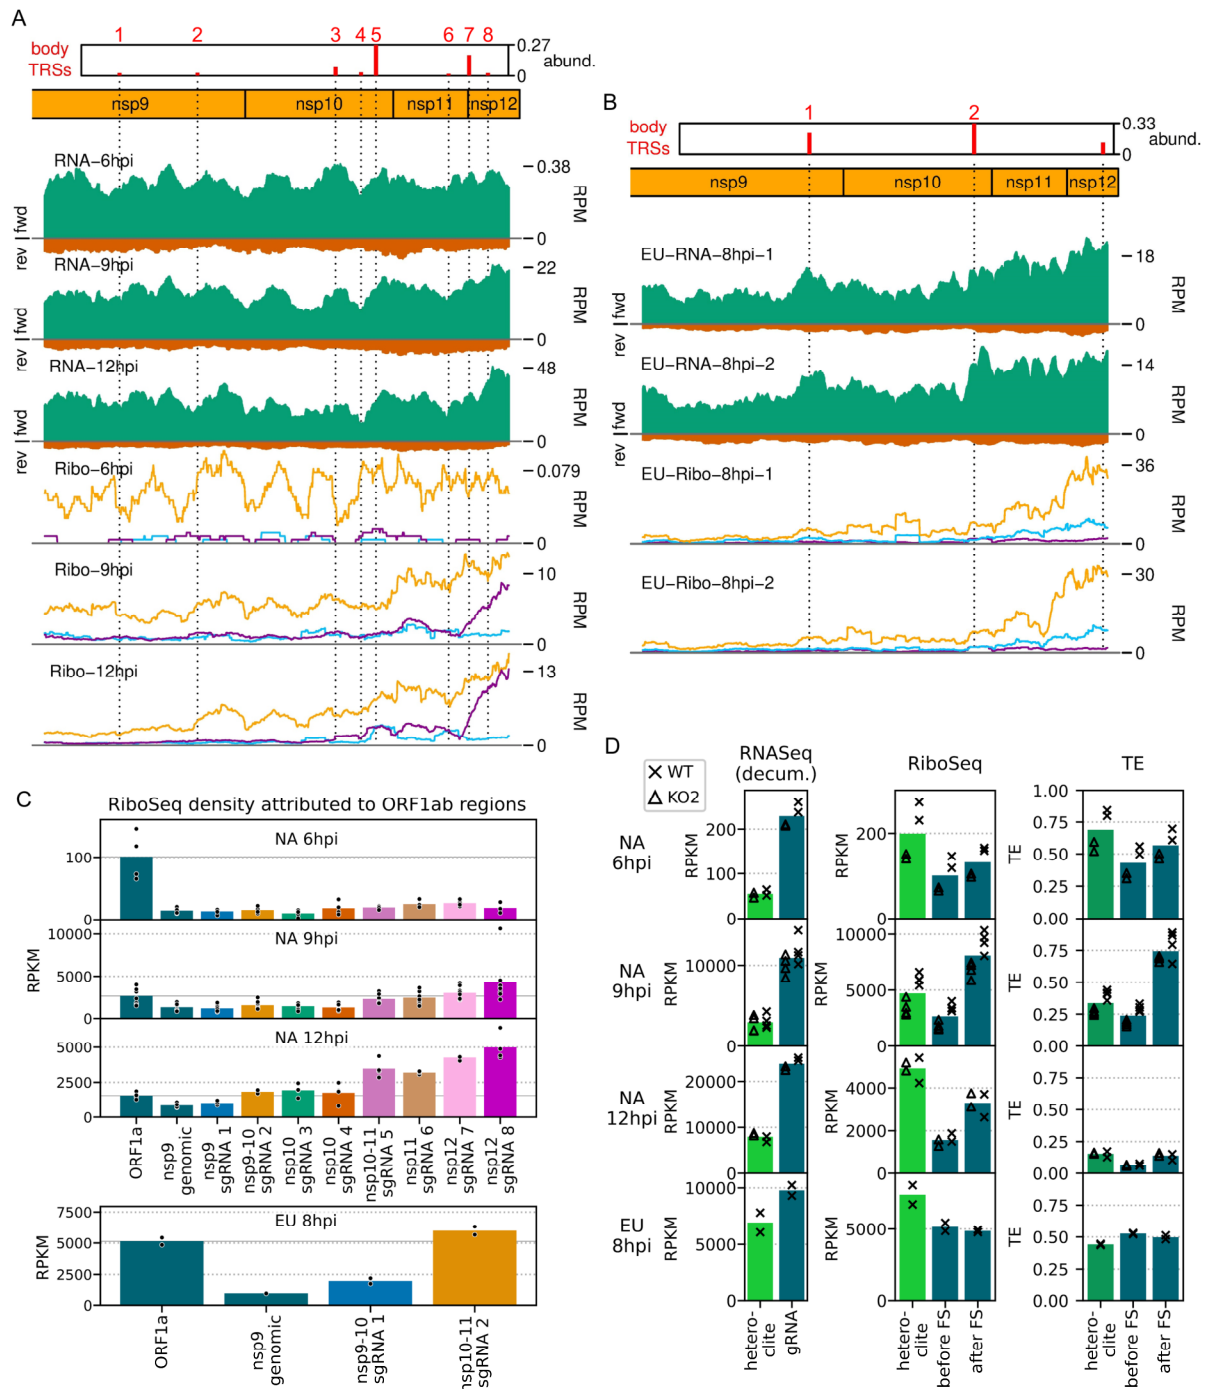

614

615 **Figure 9. Translation of specific regions of ORF1a and ORF1b.**

616 **A)** Distribution of RNASeq (upper) and RiboSeq (lower) reads mapping to the ORF1b region of  
 617 the NA PRRSV genome. Plots constructed as in Figure 2B and Figure 6B, respectively, with the  
 618 application of a 213-nt running mean filter. Dotted lines indicate body TRS positions, with  
 619 junction-spanning read abundances supporting body TRSs reproduced from Figure 6B, and the  
 620 designated ORF1b sgRNA number indicated above in red. For RNASeq, all read lengths were  
 621 used, and for RiboSeq, read lengths identified as having minimal RNP contamination were used.  
 622 The libraries displayed are those in Figure 2B and C, with remaining replicates and KO2 libraries  
 623 in Supplementary Figure 16. **B)** Distribution of RNASeq (upper) and RiboSeq (lower) reads

624 mapping to the ORF1b region of the EU PRRSV genome. For RNASeq, all read lengths were  
625 used, and for RiboSeq, read lengths with good phasing were used. Plot constructed as in panel A,  
626 with junction-spanning read abundances supporting body TRSs reproduced from Supplementary  
627 Figure 11B. The body TRS annotated at the end of nsp12 does not represent an ORF1b sgRNA,  
628 but is expected to produce an alternative transcript for GP2. **C)** RiboSeq read density attributed  
629 to different regions of ORF1b. ORF1b was divided into regions based on the positions of the  
630 ORF1b sgRNAs, and RiboSeq density of reads in-phase with ORF1b was determined. All sgRNA  
631 numbers in the x axis labels refer to ORF1b sgRNAs. RiboSeq density in ORF1a (the “before  
632 FS” region from panel D) is included for comparison and its mean value is indicated by a solid  
633 grey line. Plot constructed as in Supplementary Figure 13, using a linear scale. **D)** Gene  
634 expression in different regions of ORF1a. Transcript abundance for gRNA was calculated by  
635 determining RNASeq read density (RPKM) in the region between the major heteroclitite (S-2)  
636 junction and the nsp2 PRF site. This was subtracted from the density between the beginning of  
637 ORF1a and the major heteroclitite junction to “decumulate” (decum.) the density in this region and  
638 estimate the abundance of the heteroclitite transcripts (where all heteroclitite sgRNAs contribute  
639 read density but the normalisation for length is based only on S-2). RiboSeq read density was  
640 calculated in the region between the beginning of ORF1a and the major heteroclitite sgRNA  
641 junction (“heteroclitite”), the region between this junction and the nsp2 PRF site (“before FS”),  
642 and the region between the nsp2 and ORF1ab frameshift sites (“after FS”). Although no junctions  
643 were detected for putative heteroclitite sgRNAs in the EU dataset, regions were designated  
644 analogously to NA PRRSV, for comparison. For TE of the “heteroclitite” region, the denominator  
645 was both gRNA and (decumulated) heteroclitite sgRNA combined. Plot constructed as in  
646 Supplementary Figure 13, using a linear scale, and with WT and KO2 values indicated by crosses  
647 and triangles, respectively.

## 648 **Investigation of PRF on the viral genome**

649 Another key mechanism by which the stoichiometry of the polyprotein components is controlled is  
650 PRF. The ORF1ab frameshift site facilitates a reduction in the ratio of nsp9–12 compared to the  
651 upstream proteins<sup>11,12</sup>, whereas frameshifting at the nsp2 site produces three variants of nsp2 and causes  
652 a proportion of ribosomes to terminate before reaching nsp3<sup>[23–25,32]</sup>. The occurrence of both frameshift  
653 events is evident on the WT NA and EU PRRSV genomes from the changes in phasing after the PRF  
654 sites (Figure 10A and B, Supplementary Figures 17-20).

655 We began by quantifying the efficiency of frameshifting at the nsp2 site. Commonly, from profiling  
656 data, frameshift efficiency is calculated using the ratio of the read density upstream of the PRF site  
657 compared to downstream, where density is expected to be lower due to termination of either the 0-frame  
658 or the transframe ORF<sup>43,49–51</sup>. However, at the NA PRRSV nsp2 PRF site, ribosome drop-off at the end  
659 of nsp2N and nsp2TF is not evident (Figure 10A, Supplementary Figure 17), with an increase in  
660 RiboSeq read density after the frameshift site, as discussed above (Figure 9D). This increase is not seen

661 in the counterpart RNASeq libraries (Supplementary Figure 21) and is not related to frameshifting, as  
 662 it also occurs in the KO2 mutant, in which nsp2 frameshifting is prevented.

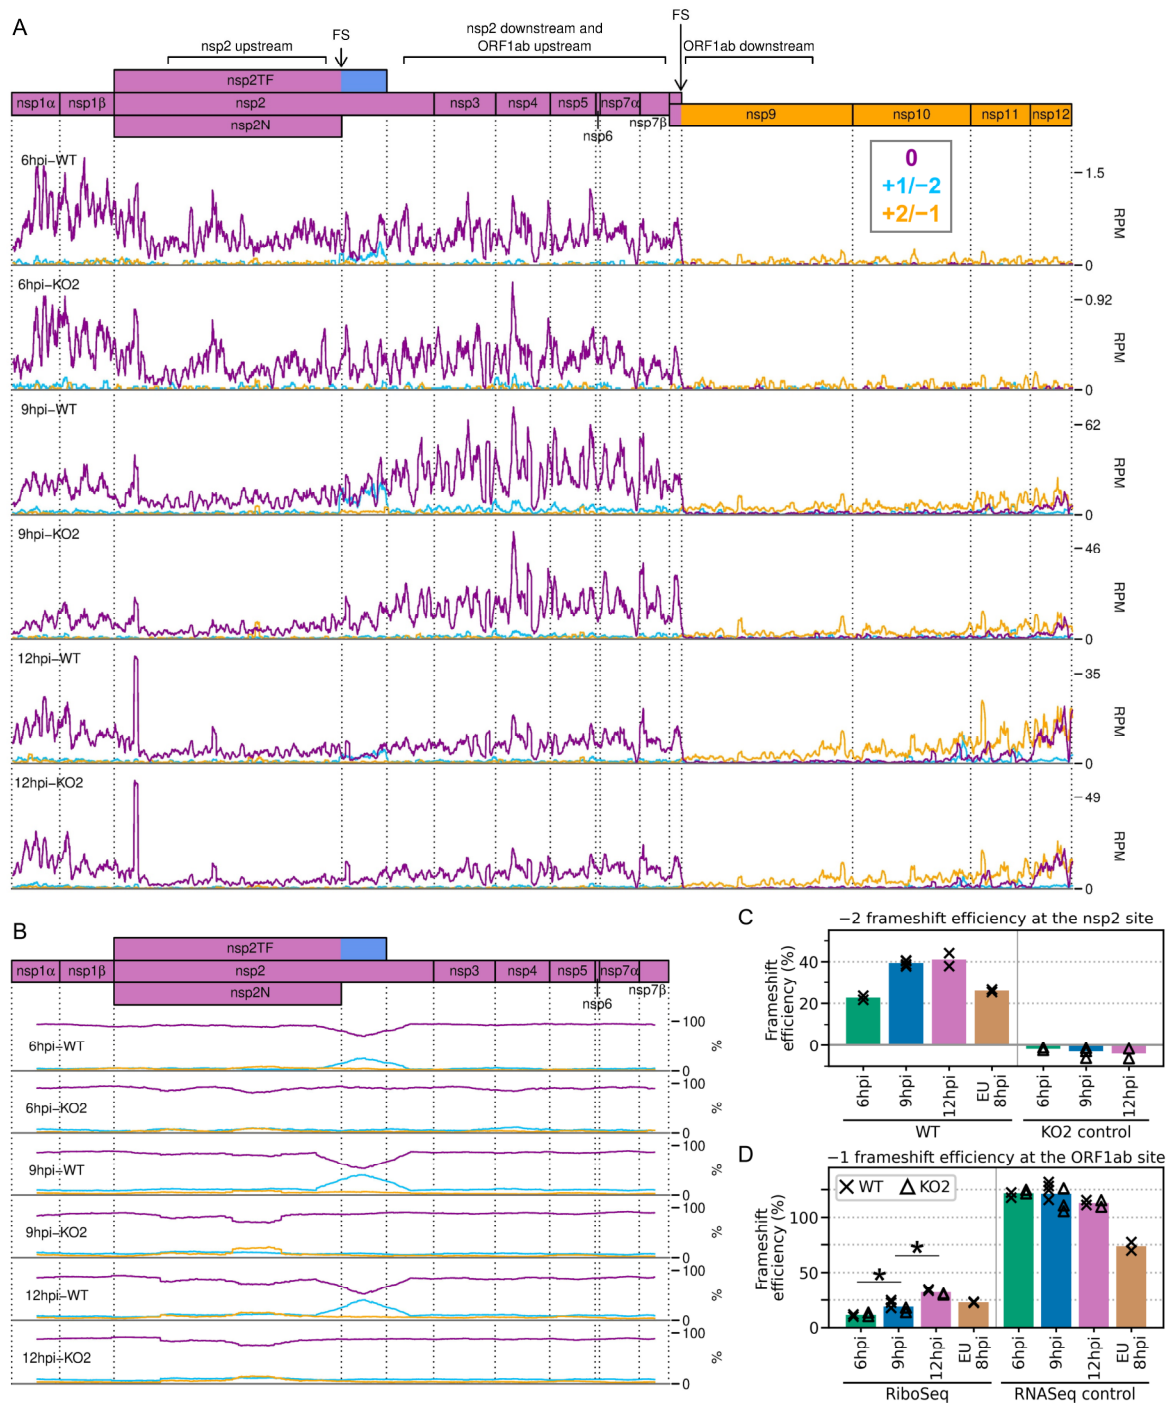

663

664 **Figure 10. Frameshifting on the PRRSV genome.**

665 **A)** Distribution of RiboSeq reads in each phase in the ORF1ab region of the NA PRRSV genome.  
 666 Plot constructed as in Figure 2C. Regions defined as “upstream” and “downstream” in the  
 667 frameshift efficiency calculations for the nsp2 and ORF1ab sites are annotated above the genome  
 668 map. Only read lengths identified as having minimal RNP contamination (indicated in

669 Supplementary Figure 4) were used to generate this plot. Replicates shown are noCHX-Ribo-  
670 6hpi-WT-2, noCHX-Ribo-6hpi-KO2-2, noCHX-Ribo-9hpi-WT-4, noCHX-Ribo-9hpi-KO2-3,  
671 noCHX-Ribo-12hpi-WT-1 and noCHX-Ribo-12hpi-KO2-1, with remaining replicates in  
672 Supplementary Figure 17. The heightened peak shortly after the beginning of nsp2 corresponds  
673 to ribosomes with proline codons, which are known to be associated with ribosomal pausing<sup>69-71</sup>,  
674 in both the P and A sites (P site genomic coordinates 1583–1585). The S-2 heteroclitite junction is  
675 shortly downstream (genomic coordinate 1747), and is excluded from the nsp2 upstream region.  
676 Similarly, the ORF1ab downstream region ends upstream of the body TRS for ORF1b sgRNA 1.  
677 **B)** Percentage of RiboSeq reads in each phase across the ORF1a region of the NA PRRSV  
678 genome. Reads were separated according to phase, and a 183-codon running mean filter applied  
679 to avoid any instances of 0 across ORF1a (excluding the half-window at each end). From this,  
680 the percentage of reads in each phase at each codon was calculated. Replicates shown are those  
681 from panel A, with remaining replicates in Supplementary Figure 18. Only read lengths with  
682 minimal RNP contamination were used to generate this plot. **C)** Bar chart of  $-2$  PRF efficiency  
683 at the nsp2 site, calculated based on the differences in phasing in the upstream and transframe  
684 regions (data from Supplementary Figure 20). Bars represent the mean results for each group,  
685 with individual datapoints overlaid as crosses (WT) and triangles (KO2). The KO2 libraries  
686 provide a negative control (expected value  $\sim 0\%$ ). Only read lengths identified as having minimal  
687 RNP contamination (NA PRRSV) or good phasing (EU PRRSV) were used to perform these  
688 calculations. **D)** Percentage frameshift efficiency at the ORF1ab site, calculated based on  
689 differences in read density upstream and downstream of the frameshift site. Plot constructed as  
690 in panel C, with WT and KO2 scatter points offset on the x axis to aid visualisation. The right-  
691 hand panel shows the results of applying these calculations to RNASeq reads as a control, for  
692 which the expected result is  $\sim 100\%$ . Only RiboSeq read lengths with minimal RNP contamination  
693 (NA PRRSV) or, for comparability, good phasing (EU PRRSV) were used to perform these  
694 calculations. For the RNASeq control all read lengths were used.

695 Initially, drawing on our previous work on coronaviruses<sup>40,43</sup>, we attempted to estimate frameshift  
696 efficiencies at the nsp2 site by dividing the RiboSeq profile for the WT virus by that of the KO2 mutant,  
697 to factor out differences in translation speed and/or biases introduced during library preparation (see  
698 Methods for details). Using the resulting quotient profile, we then compared densities upstream of the  
699 nsp2 frameshift site and downstream of the nsp2TF stop codon in order to calculate the combined  $-2/-1$   
700 frameshift efficiency at different timepoints. However, the nsp2-site frameshift efficiencies calculated  
701 using this method were quite variable (Supplementary Figure 22A and B). This may be due to the  
702 modest level of frameshifting at this site (see below) meaning ribosomal drop-off is low relative to the  
703 level of non-frameshift translation, besides the extra complications of (temporally dependent)  
704 heteroclitite and noncanonical sgRNA production in PRRSV. This is in contrast to coronaviruses, where  
705 the frameshift efficiencies reach  $\sim 80\%$ <sup>40,43</sup> and there is only a single transcript species (full-length  
706 gRNA), or frameshifting at the ORF1ab site, where it is only frameshifted ribosomes rather than non-  
707 frameshifted ribosomes that contribute to downstream RiboSeq density.



708 Therefore, we instead quantified  $-2$  PRF efficiency at the nsp2 site by comparing the proportion of  
709 reads in each phase in the upstream and transframe regions (see Methods for details). This led to much  
710 greater reproducibility between replicates, and revealed that  $-2$  PRF efficiency significantly increases,  
711 from 23% at 6 hpi to 39% at 9 hpi, at which point it reaches a plateau (Figure 10C, Supplementary  
712 Figure 22;  $p < 0.0005$  based on bootstrap resampling). Although these calculations could be  
713 systematically biased if translation were slower in one frame than the other (for example due to sub-  
714 optimal codon usage resulting from maintaining two overlapping ORFs), such bias would not be  
715 expected to change systematically over the timecourse of infection, and therefore the observed trend  
716 should be robust. This is only the second known example of temporally regulated PRF (after  
717 coronaviruses<sup>40</sup>), and supports a model of increasing  $-2$  PRF efficiency as nsp1 $\beta$ , the viral protein  
718 responsible for stimulating PRF at this site, accumulates and then similarly starts to plateau at 9 hpi  
719 (Figure 3D and E). The  $-2$  PRF efficiency on the EU PRRSV genome at 8 hpi was estimated to be 26%,  
720 which is similar to the 20% value determined by <sup>35</sup>S-Met radiolabelling of MARC-145 cells infected  
721 with the EU PRRSV isolate SD01-08 and harvested at 24 hpi (MOI 0.1)<sup>[23]</sup>. The efficiency of EU  
722 PRRSV  $-2$  PRF at 8 hpi (26%) is significantly lower than the NA PRRSV efficiency at 9 hpi (39%;  $p$   
723  $< 0.0005$  based on bootstrap resampling). This likely reflects differences between the two viruses as  
724 opposed to the difference in timepoints, as EU nsp1 $\beta$  has already accumulated by 8 hpi (Figure 3F), and  
725 gene expression analyses suggest the 8 hpi EU PRRSV samples and 9 hpi NA PRRSV samples have  
726 progressed to a similar stage of infection (for example, see Figure 2). Although these higher levels  
727 (~39%) of  $-2$  PRF have not previously been measured in the context of viral infection, nsp2-site  
728 frameshift efficiencies of up to ~50% have been previously recorded in various reporter systems<sup>23,24,37</sup>,  
729 confirming that this site is capable of facilitating the highly efficient  $-2$  PRF observed here.

730 Frameshift efficiency at the arterivirus ORF1ab site has not previously been determined in the context  
731 of infection, although previous studies using transfected reporter constructs for PRRSV<sup>22</sup> (in yeast) and  
732 EAV<sup>21</sup> (in HeLa cells) estimated  $-1$  PRF efficiency as 16% and 15–20%, respectively. We set out to  
733 quantify its efficiency in the context of PRRSV infection. Ribosomal drop-off is clearly evident at the

734 ORF1ab -1 PRF site for both NA and EU PRRSV, corresponding to ribosomes which do not frameshift  
735 encountering the ORF1a stop codon shortly downstream of the frameshift site (Figure 10A,  
736 Supplementary Figure 17). We quantified the ratio of RiboSeq read density in the region downstream  
737 of the PRF site compared to that upstream to calculate frameshift efficiency (Figure 10D). PRF  
738 efficiency at RNA structure-directed sites is commonly assumed to be fixed; however, surprisingly, -1  
739 PRF efficiency at this site also increased over the course of infection, from 11% at 6 hpi to 19% at 9  
740 hpi ( $p$  value from two-tailed Mann-Whitney U test =  $8.5 \times 10^{-3}$ ), and further increased to 32% at 12 hpi  
741 ( $p = 8.5 \times 10^{-3}$ ). The same trend was not observed in the RNASeq libraries (Figure 10D), which were  
742 processed as a negative control, indicating it does not result from shared technical biases or an increase  
743 in non-canonical transcripts facilitating translation of ORF1b (note that all detected ORF1b sgRNAs  
744 are excluded from the regions used). The ORF1ab -1 PRF efficiency on the EU PRRSV genome at 8  
745 hpi was 23%, which is similar to the calculated efficiency for NA PRRSV at 9 hpi (Figure 10D). This  
746 is consistent with the replicase components being required at similar stoichiometries at this stage of  
747 infection for these two viruses.

748 Ribosomal pausing over the slippery sequence is considered to be an important mechanistic feature of  
749 PRF<sup>18,19,72,73</sup>, although it has been difficult to detect robustly on WT slippery sequences using ribosome  
750 profiling<sup>49-51</sup>. To determine whether ribosomal pausing occurs over the nsp2 slippery sequence, we  
751 plotted the RPF distribution on the WT genome in this region, and compared this to the KO2 genome  
752 to control for shared biases (Supplementary Figure 23A). This revealed a peak on the WT genome,  
753 derived predominantly from 21-nt reads and corresponding to ribosomes paused with P site over the  
754 slippery sequence (G-GUU-UUU, P site pause location underlined, hyphens delineate 0-frame codons)  
755 (Supplementary Figure 23A-C). The peak is not present on the KO2 genome, nor does it overlap the  
756 point mutations of KO2, indicating that the differences between the WT and KO2 profiles do not result  
757 from technical biases (Supplementary Figure 23D), however its origin is unclear. The frameshift-  
758 associated pause is thought to occur at a late stage of the translocation event which begins with the  
759 GUU codon in the P site<sup>20,73,74</sup>. The positioning of the short-read peak one nt downstream of this could

760 be due to an unusual frameshift-intermediate conformation (for example a hyper-rotated state<sup>75,76</sup>)  
761 protecting a shorter region of mRNA in the exit tunnel. However, short RPFs are thought to originate  
762 from post-translocation ribosomes without an aminoacyl-tRNA in the A site<sup>55,56</sup>, suggesting this peak  
763 could instead represent ribosomes pausing while decoding the first codon of nsp2TF, which would not  
764 be translated on the KO2 genome. This UUG (Leu) codon is normally not expected to be slow to decode,  
765 as it is well-adapted to the cellular tRNA pool (Supplementary Figure 23A, heatmap); however, other  
766 factors, such as incomplete dissociation of the PCBP/nsp1 $\beta$  complex shortly downstream, could hinder  
767 decoding after frameshifting. We found no convincing evidence of ribosomal pausing at the ORF1ab  
768 -1 PRF site, and it will be interesting to see whether future ribosome profiling studies which capture  
769 the population of short RPFs find similar pauses at other sites.

## 770 **Host differential gene expression at 12 hpi**

771 Finally, we interrogated our datasets to investigate the host transcriptional and translational response to  
772 NA PRRSV infection. Although several analyses of host differential transcription have been performed  
773 previously<sup>32,77-83</sup>, changes in the host transcriptome in response to PRRSV infection have not been  
774 determined. Here, we characterise infection-induced changes in host transcription and TE by analysing  
775 our 12 hpi libraries using xtail<sup>84</sup> and DESeq2<sup>[85]</sup>.

776 First, we compared the WT libraries against mock (Figure 11A, Supplementary Table 9) and the KO2  
777 libraries against mock (Figure 11B, Supplementary Table 10). Similarly to other studies<sup>79,86,87</sup>, we  
778 found transcription of genes related to regulation of the cell cycle (amongst other GO terms) to be  
779 perturbed by WT PRRSV infection (Supplementary Table 9, sheet: 'GO\_TS\_up'; GO term  
780 GO:0051726 ~26-fold enriched in transcriptionally up-regulated genes). However, a comparison of  
781 transcriptional fold changes with those of TE reveals that the majority of transcriptionally up-regulated  
782 genes in WT or KO2 compared to mock are down-regulated in terms of TE (Figure 11A and B, top-left  
783 quadrants of right-column panels). Such an effect has previously been described as “translational  
784 buffering” and is expected to result in little to no change in protein abundance<sup>88</sup>, suggesting that many



785 of the observed transcriptional changes make only a minor contribution to the host response to infection.  
786 This is consistent with the observation that many of the GO terms enriched amongst the transcriptionally  
787 up-regulated genes are also enriched in the translationally down-regulated genes (Supplementary Table  
788 9, 'GO\_TE\_down' sheet). Comparisons between RNA and TE fold changes further reveal many genes  
789 with large fold changes of TE and little to no change at the transcriptional level (Figure 11A and B,  
790 right-column panels, points in centre-left and centre-right regions), suggesting that translational  
791 regulation may be a greater contributor to the host response than transcriptional changes. This is  
792 supported by the fact that several GO terms (such as those related to lipid binding and the extra-cellular  
793 matrix) are enriched amongst the lists of translationally regulated genes and not in the genes  
794 transcriptionally regulated in the opposing direction (Supplementary Tables 9 and 10).

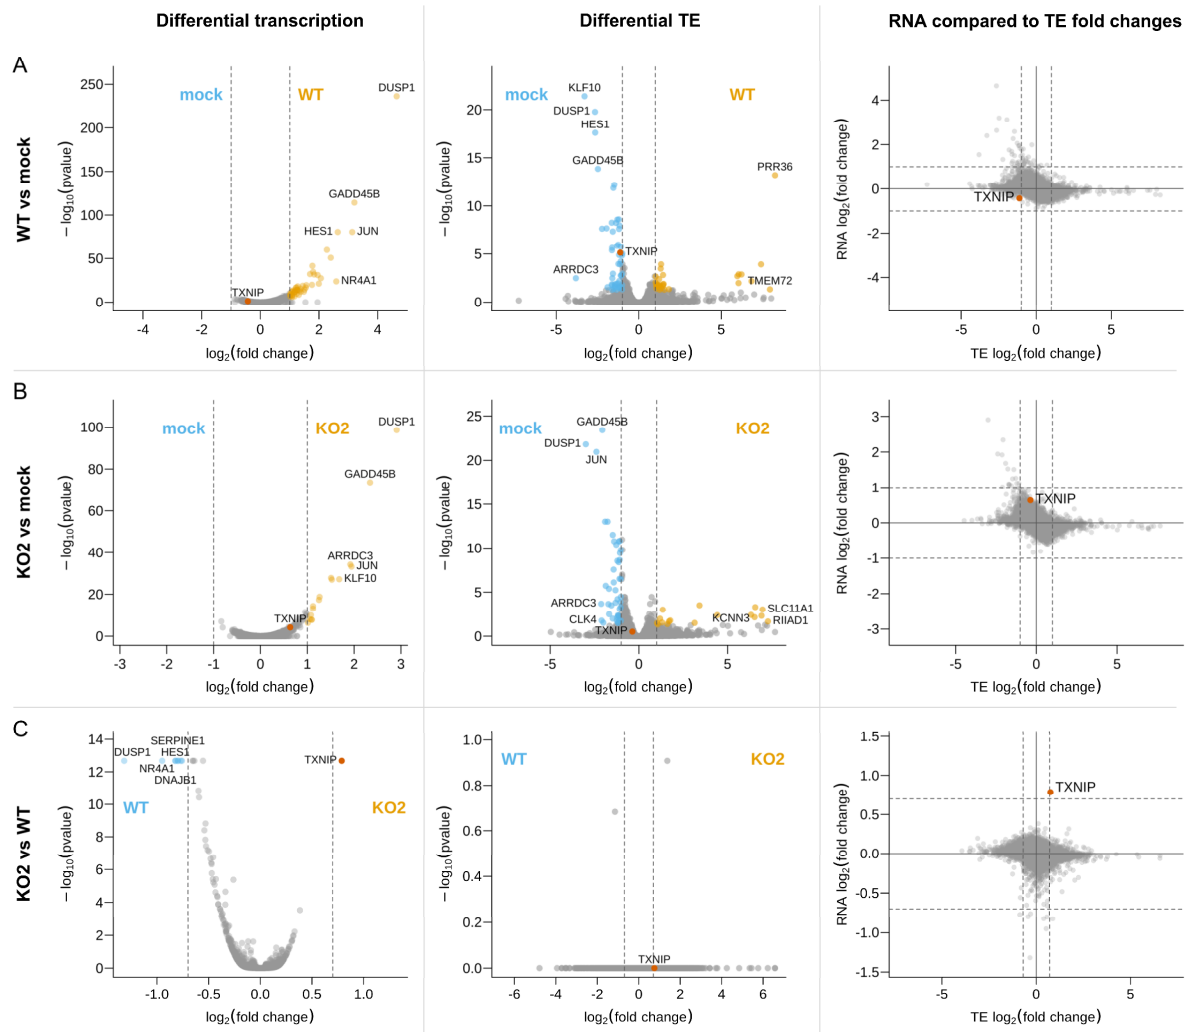

795

796 **Figure 11. Host differential gene expression at 12 hpi.**

797 Differences in transcription (**left**) and translation efficiency (**centre**) were determined using  
 798 DESeq2 and xtail, respectively. Volcano plots show relative changes in pair-wise comparisons  
 799 between the 12 hpi libraries ( $n = 2$  biological replicates per condition): WT and mock (**top**), KO2  
 800 and mock (**centre**) or KO2 and WT (**bottom**). The y axis shows the false discovery rate (FDR)-  
 801 corrected  $p$  values. Genes with FDR-corrected  $p$  values  $\leq 0.05$  and  $\log_2(\text{fold change})$  magnitudes  
 802 greater than 1 (WT vs mock and KO2 vs mock) or 0.7 (KO2 vs WT; thresholds in each case  
 803 indicated by grey dashed lines) were considered differentially expressed and are coloured orange  
 804 (up-regulated) or blue (down-regulated) in the volcano plots. Where gene names were available,  
 805 those of the top five significantly up- or down-regulated genes with the greatest fold changes are  
 806 annotated, and TXNIP is annotated in red on all plots. For all genes where both RNA and TE fold  
 807 changes were determinable, these were compared (**right**), irrespective of  $p$  value. The full results  
 808 of these differential expression analyses, including lists of GO terms enriched in each set of  
 809 differentially expressed genes, are in Supplementary Table 9, Supplementary Table 10 and  
 810 Supplementary Table 11.

811

812 We moved on to compare the host response to infection with WT PRRSV to that of KO2 PRRSV, to  
813 investigate the effects of the nsp2 frameshift products, nsp2TF and nsp2N (Figure 11C, Supplementary  
814 Table 11). As we expected relatively small differences in the gene expression programmes activated by  
815 the two viruses, we lowered the magnitude of the  $\log_2(\text{fold change})$  required to qualify as a  
816 “differentially expressed” gene (DEG) from 1 (in comparisons of infected vs mock) to 0.7 to increase  
817 sensitivity. Many of the DEGs in the comparison between WT and KO2 also appear in the list of DEGs  
818 in the WT vs mock comparison. These genes have fold changes in the same direction in both the WT  
819 vs mock and KO2 vs mock analyses, but those in the KO2 analysis are of a lower magnitude, likely  
820 representing the slightly slower replication kinetics of the mutant virus<sup>23,32</sup> as opposed to meaningful  
821 differences in the host response. An exception to this is thioredoxin interacting protein (TXNIP,  
822 formerly known as vitamin D<sub>3</sub> up-regulated protein 1; Figure 11, red). TXNIP is significantly more  
823 highly transcribed in KO2 than WT infection [ $\log_2(\text{fold change}) = 0.79$ ,  $p = 2.1 \times 10^{-13}$ ; Figure 11C,  
824 left column] and, although it is below our thresholds for qualification as a DEG in these analyses, it is  
825 transcriptionally regulated in opposing directions in the WT vs mock [ $\log_2(\text{fold change}) = -0.43$ ,  $p =$   
826  $0.055$ ] and KO2 vs mock [ $\log_2(\text{fold change}) = 0.64$ ,  $p = 7.0 \times 10^{-5}$ ] comparisons (Figure 11A and B,  
827 left column), suggesting the difference is not related to replication kinetics. No genes generated  
828 significant  $p$  values for the KO2 vs WT TE analysis (Figure 11C, middle column), in which the  
829 distribution of  $p$  values was conservative, likely due to the similarity between the two datasets.  
830 Nonetheless, TXNIP clearly stands out in the comparison of RNA and TE fold changes as it is both  
831 more highly transcribed and more efficiently translated in KO2 than WT (Figure 11C, right column),  
832 further supporting the conclusion that increased TXNIP expression is a notable feature of KO2  
833 infection.

834 The mechanism by which the presence of nsp2TF/nsp2N could lead to reduced TXNIP expression in  
835 WT infection is unclear. The frameshift products share a PLP2 protease domain with the 0-frame  
836 product, nsp2, although the DUB/deISGylase activity of this domain is most potent in nsp2N<sup>32</sup>. The  
837 frameshift proteins also have different sub-cellular distributions to nsp2<sup>[23,36]</sup>, which may grant them

838 access to proteins involved in the transcriptional activation of TXNIP, allowing them to interfere with  
839 this signalling pathway (for example by de-ubiquitinating its components). While the mechanism  
840 remains elusive, there are several reasons why this down-regulation may be beneficial to PRRSV.  
841 TXNIP is a key protein in metabolism and redox homeostasis<sup>89,90</sup>, regulates cell survival/apoptosis via  
842 apoptosis signal regulating kinase 1 (ASK1)<sup>91</sup>, and triggers NLRP3 inflammasome activation in  
843 monocytes and innate immune cells<sup>92,93</sup>. TXNIP largely exerts its functions by binding and inhibiting  
844 thioredoxin<sup>94</sup>, an antioxidant which is central to redox signalling and homeostasis<sup>95,96</sup>, and reduced  
845 cellular levels of TXNIP lead to lower concentrations of reactive oxygen species (ROS)<sup>97,98</sup>. ROS are  
846 known to be induced by PRRSV infection<sup>99,100</sup>, and lead to apoptosis<sup>100,101</sup>, which would likely be  
847 detrimental to viral replication. Further, ROS, and by extension thioredoxin and TXNIP, have particular  
848 significance for the physiology and function of macrophages<sup>102,103</sup>, the primary target for PRRSV *in*  
849 *vivo*<sup>104</sup>. As well as being integral to phagocytosis<sup>102,103</sup>, ROS exert a complex, context-dependent effect  
850 on macrophage polarisation<sup>105,106</sup>, and high levels of thioredoxin have been found to favour polarisation  
851 of M2 macrophages<sup>107</sup>. These produce less anti-viral cytokines, and are less suppressive of PRRSV  
852 replication, than their M1 counterparts<sup>108</sup>. Therefore, reducing cellular TXNIP concentrations during  
853 WT PRRSV infection may be favourable by allowing thioredoxin to function uninhibited and  
854 preventing excessive ROS concentrations, with potential implications for macrophage physiology and  
855 polarisation. Indeed, it has already been suggested that PRRSV infection induces a skew towards M2  
856 polarisation, although the mechanism was uncharacterised<sup>108</sup>.

## 857 **Discussion**

858 Here, we describe a high resolution analysis of PRRSV replication through ribosome profiling and  
859 RNASeq. In addition to confirming and extending the findings of previous transcriptomic analyses, we  
860 define the PRRSV translome and identify strategies of gene expression that may permit the virus to  
861 exert translational control during the replication cycle (Figure 12).

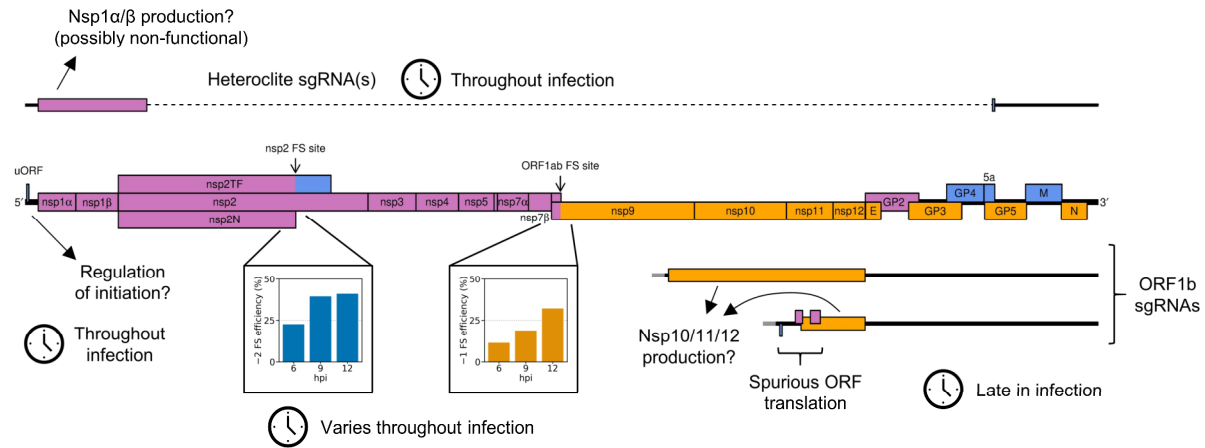

862

863 **Figure 12. Schematic summary of non-canonical mechanisms of PRRSV gene expression**  
 864 **regulation supported by this study.**

865

866 Global analysis of the host response to PRRSV infection at 12 hpi reveals that many of the observed  
 867 changes in transcript abundance are offset at the translational level, indicating that changes in translation  
 868 efficiency of host mRNAs may play a dominant role in the response to infection. This phenomenon of  
 869 host transcriptional responses being counteracted by opposing changes in TE has also been observed in  
 870 response to SARS-CoV-2 infection, where it was attributed to inhibition of mRNA export from the  
 871 nucleus, preventing translation<sup>109,110</sup>. This activity is known to be associated with coronavirus nsp1,  
 872 which inhibits nuclear export by interacting with the nuclear export factor NXF1 in SARS-CoV or the  
 873 nuclear pore complex component Nup93 in SARS-CoV-2<sup>[111,112]</sup>. Similarly, PRRSV nsp1 $\beta$  causes  
 874 imprisonment of host mRNAs in the nucleus, by binding Nup62 to cause the disintegration of the  
 875 nuclear pore complex<sup>113,114</sup>. This inhibition of host mRNA nuclear export has been found to reduce  
 876 synthesis of interferon-stimulated genes<sup>114</sup>, and mutations in nsp1 $\beta$  which ablate this activity lead to  
 877 reduced viral load and increased neutralising antibody titres in pigs<sup>115</sup>. These findings suggest that  
 878 nsp1 $\beta$ -mediated nuclear export inhibition may be responsible for the translational repression seen in our  
 879 host differential gene expression analyses, which, analogously to conclusions drawn for SARS-CoV-  
 880 2<sup>[109,110]</sup>, may be a key mechanism by which PRRSV evades the host response to infection.

881 On the viral genome, numerous translated novel ORFs were discovered, including a short but highly  
882 expressed uORF in the NA PRRSV 5' UTR. The presence of this uORF is very well-conserved amongst  
883 NA PRRSV isolates, with an AUG in this position in 558/564 available NA PRRSV sequences, and a  
884 non-canonical initiation codon (GUG/AUA/ACG) present in the remainder. In many contexts, uORFs  
885 have been shown to regulate translation of the main ORF downstream<sup>116</sup> and, interestingly, uORFs have  
886 been found in many nidovirus genomes. For example, recent ribosome profiling studies of the  
887 coronaviruses MHV, IBV and SARS-CoV-2 revealed translation of uORFs initiating within the 5'  
888 leader<sup>49-51,117</sup>. Intriguingly, the extent of translation initiation on the SARS-CoV-2 leader uORF differs  
889 on different viral transcripts<sup>51,117</sup>, suggesting that the same could be true of the NA PRRSV uORF, and  
890 presenting a potential mechanism by which the uORF could differentially regulate translation of the  
891 canonical ORFs downstream. Looking to the *Arteriviridae* family, EAV has a highly conserved AUG  
892 within the leader (present in 94/95 available genome sequences), at genomic coordinates 14–16,  
893 predicted to permit expression of a 37-amino-acid leader peptide<sup>118</sup>. *In vitro* translation of the N  
894 transcript demonstrated that the uORF is translated, and found it down-regulated translation of the  
895 downstream N ORF<sup>119</sup>. Mutations which disrupted this AUG or altered its predicted initiation efficiency  
896 were detrimental to viral fitness and led to rapid reversion to the WT sequence<sup>119</sup>, although the uORF  
897 was not essential for virus viability<sup>119,120</sup>. Upstream ORFs in other arteriviruses have not been  
898 characterised, although it was noted that the SHFV 5' leader contains a putative 13-codon uORF at  
899 genomic coordinates 35–73<sup>[121]</sup>, which is conserved in all 37 available full genome sequences. This  
900 SHFV uORF is of a similar length and position to the NA PRRSV uORF (ten codons; genomic  
901 coordinates 24–36), with the uORFs in these two viruses ending, respectively, 126 nt and 128 nt  
902 upstream of the leader TRS. The similarity between these two putative uORFs suggests a possible  
903 conserved function, for example conferring resistance to eIF2 $\alpha$ -phosphorylation-mediated translation  
904 inhibition (as observed for some cellular uORFs<sup>122</sup>), or affecting re-initiation efficiency on the  
905 downstream ORF. The latter could help to modulate the ratio of overlapping ORFs (GP2:E and/or  
906 GP5:5a) in which the downstream AUG is thought to be accessed by leaky scanning. However, only  
907 three out of the 100 EU PRRSV genome sequences with any 5' UTR have AUGs other than at the



908 extreme 5' end of the leader, and we do not detect robust uORF translation in the EU PRRSV isolate  
909 used in this study, indicating that any putative function of the uORF is not conserved across the entire  
910 family.

911 Our analysis of canonical PRRSV ORFs over a 12 hour timecourse revealed that expression of many  
912 of these ORFs is controlled by additional mechanisms, at both the transcriptional and translational level,  
913 beyond what was previously appreciated. A key observation is that -2 PRF at the NA PRRSV nsp2  
914 PRF site is both highly efficient and temporally regulated. At 6 hpi its efficiency is 23%, and this  
915 increases to ~40% at 9 and 12 hpi, likely due to accumulation of the frameshift-stimulatory viral protein,  
916 nsp1 $\beta$ . Such regulation may be a selective advantage for PRRSV by directing ribosomes to translate  
917 proteins which are most beneficial at each stage of infection, optimising the use of cellular resources.  
918 At early timepoints, lower nsp2 frameshift efficiency means more ribosomes continue to translate the  
919 remainder of pp1a or pp1ab, which encode components of the replication and transcription complex  
920 (RTC), which may be more important for establishing infection than translation of the accessory protein  
921 nsp2TF. Later in the replication cycle, higher -2 PRF efficiency likely corresponds to an increased  
922 requirement for nsp2TF to prevent degradation of GP5 and M, which are expressed from ~8 hpi and are  
923 essential for virion assembly<sup>36,123</sup>. Further, nsp2TF is a more potent innate immune suppressor than  
924 nsp2, and down-regulates expression of swine leukocyte antigen class I (swine MHC class I)<sup>32,124</sup>, which  
925 may become critical later in infection as viral proteins and double-stranded RNA accumulate due to  
926 viral translation and replication. The only other known example of temporally regulated frameshifting  
927 is provided by cardioviruses<sup>40</sup>, which encode the only other known protein-stimulated PRF site<sup>38-43</sup>.  
928 This suggests that temporal regulation may emerge as a common feature of *trans*-activated PRF sites,  
929 as more non-canonical PRF sites are discovered in future.

930 RNA structure-directed frameshift sites are commonly assumed to operate at a fixed ratio, due to the  
931 lack of *trans*-acting factors involved; however, we found that -1 PRF efficiency at the ORF1ab site  
932 increased over time, from 11% to 32%. As opposed to representing specific "regulation" of PRF, we  
933 suggest that this is due to changes in gRNA translation conditions as infection progresses. Such changes

934 could result from activation of pathways that globally regulate translation, such as the unfolded protein  
935 response (which is known to be activated by PRRSV infection<sup>125</sup>) or potential phosphorylation of eEF2  
936 (discussed above). Additionally, changes in the localisation or availability of gRNA for translation  
937 could result in changing ribosome density as infection progresses, and decreases in ribosome load have  
938 been shown to increase –1 PRF efficiency in some studies<sup>126,127</sup>. The mechanism responsible for this  
939 effect is not well characterised, although it has been suggested that frameshift-stimulatory RNA  
940 structures are more likely to have time to re-fold in between ribosomes if the transcript is more sparsely  
941 occupied<sup>126,127</sup>. Consistent with this hypothesis, we find a trend of decreasing gRNA TE over time,  
942 although this analysis may be confounded by, for example, the inability to discern translatable gRNA  
943 from that undergoing packaging. Whether the observed changes in PRF efficiency represent a selective  
944 advantage for PRRSV, or whether they are simply incidental, is unclear. The expected result is an  
945 increase in the ratio of ORF1b products to ORF1a products over time. This could be advantageous for  
946 PRRSV, for example if there is a greater requirement for nsp2 and nsp3, which promote DMV  
947 formation<sup>34</sup>, early in infection to establish a protective environment for viral replication, followed by a  
948 later preference for producing more of the RdRp (nsp9) and helicase (nsp10) to promote replication  
949 itself. Alternatively, this could simply reflect that PRRSV can tolerate a reasonably wide range of  
950 ORF1a:ORF1b stoichiometries. Nonetheless, the finding that changes in the translational landscape  
951 during infection affect PRF efficiency is relevant to many other RNA viruses, and future studies may  
952 reveal temporal changes in PRF efficiency at other frameshift sites, such as those in coronaviruses and  
953 HIV. For MHV and SARS-CoV-2, previous results suggest ORF1ab frameshift efficiency may increase  
954 over time<sup>49,117,128</sup>, but temporal dependence was not assessed in detail, nor statistical significance  
955 determined, highlighting this as an interesting area for future coronavirus research.

956 In addition to changes in the ratio of ORF1b to ORF1a translation, we observed temporal changes in  
957 the relative translation of different regions within ORF1b, with increasing translation of the 3'-proximal  
958 region as infection progresses. This may result from translation of non-canonical sgRNAs, which we  
959 term ORF1b sgRNAs, in which the body TRS is within ORF1b. If the putative translated proteins are

960 processed to produce functional nsps, this would be expected to increase the stoichiometry of nsps 10–  
961 12 compared to nsp9, and alter the relative stoichiometries of nsp10, nsp11 and nsp12. There are several  
962 possible reasons this could be beneficial to viral fitness. Although the stoichiometry of the arterivirus  
963 RTC is unknown, there is some evidence that the stoichiometry of the coronavirus replication complex  
964 varies, containing either one or two copies of the helicase for each copy of the holo-RdRp<sup>129</sup>. This  
965 highlights the possibility that the composition of the PRRSV RTC could change over time, for example  
966 if extra copies of nsp10, 11 or 12 are supplied from ORF1b sgRNA translation (as well as the potential  
967 contribution of increased ORF1ab frameshift efficiency). This provides a potential mechanism of  
968 regulating viral replication, for example by altering the ratio of gRNA to sgRNA production (as  
969 observed in Figure 2 and Figure 8), as both nsp10 (the helicase) and nsp12 are thought to be involved  
970 in promoting sgRNA transcription<sup>129–134</sup>. Nsp11 (NendoU) is an endoribonuclease found in many  
971 nidoviruses, which has broad substrate specificity *in vitro*<sup>135</sup>, and is also an innate immune antagonist<sup>136–</sup>  
972 <sup>140</sup>. Its expression outside the context of infection is highly toxic<sup>139,141</sup>, leading to the suggestion that its  
973 restricted perinuclear localisation during infection is important to prevent its expression becoming  
974 “suicidal” for the virus<sup>9,137</sup>. Therefore, it may be beneficial to maintain relatively low levels of nsp11  
975 early in infection, and increase production after the optimal microenvironment for its localisation has  
976 formed. However, such possibilities are clearly speculative at present.

977 Interestingly, ORF1b sgRNAs have been found in a number of other nidoviruses. Our results are highly  
978 consistent with a previous study on SHFV, in which several ORF1b sgRNAs were detected, which were  
979 predicted to produce in-frame portions of the ORF1b polyprotein, or in one case a novel overlapping  
980 ORF<sup>45</sup>. Quantitative mass spectrometry provided support for translation of both categories of ORF1b  
981 sgRNA, and showed that peptides from nsp11 and nsp12 were 1.2- and 3.1-fold more abundant  
982 (respectively) than those from ORF1a-encoded nsp8<sup>[45]</sup>. ORF1b sgRNAs were also found in lactate  
983 dehydrogenase elevating virus (predicted to express the C-terminal 200 amino acids of ORF1b)<sup>142</sup>,  
984 SARS-CoV-2, HCoV-229E and equine torovirus<sup>46,48,51,59</sup>. Whether this has evolved by virtue of  
985 conferring a selective advantage, or whether it is a neutral consequence of the promiscuous

986 discontinuous transcription mechanism, this suggests that ORF1b sgRNAs are a conserved feature of  
987 the nidovirus transcriptome. Further characterisation of these non-canonical transcripts would be highly  
988 informative, to determine potential initiation sites and ascertain whether any in-frame products are  
989 functional.

990 Another group of non-canonical transcripts with the potential to modulate polyprotein stoichiometry  
991 comprises those termed “heteroclite sgRNAs” by Yuan *et al.*<sup>44,62</sup>. These transcripts result from large  
992 internal deletions between regions of sequence similarity in nsp1 $\beta$ /nsp2 and the canonical sgRNA  
993 ORFs<sup>44,62</sup>, and have been found in several isolates of NA PRRSV<sup>44,62</sup> (including in the present work),  
994 with similar types of transcripts found in coronaviruses<sup>46,47,59,143</sup>. Translation of these transcripts is  
995 supported by our ribosome profiling results (Figure 9D), *in vitro* experiments using PRRSV reporter  
996 constructs<sup>62</sup>, and ribosome profiling and mass spectrometry studies of SARS-CoV-2-infected  
997 cells<sup>47,51,144–146</sup>. However, it remains to be determined whether the resultant proteins are appropriately  
998 cleaved to generate functional nsps. We detected heteroclite sgRNAs as early as 3 hpi, consistent with  
999 the finding that they are packaged into PRRSV virions<sup>44,62</sup>, and our results suggest they are present  
1000 throughout infection. If they do produce functional proteins, this could serve as a mechanism to increase  
1001 the levels of nsp1 $\alpha$  and nsp1 $\beta$ , generally considered the most potent innate immune suppressors encoded  
1002 by PRRSV<sup>113–115,147–151</sup>, from early timepoints onwards to evade immune activity.

## 1003 **Conclusion**

1004 This work is the first application of ribosome profiling to an arterivirus, and has revealed a complex  
1005 complement of PRRSV gene expression strategies, several of which permit stoichiometric modulation  
1006 of the polyprotein proteins. At the level of translational control, the nsp2 –2 PRF site was found to be  
1007 a rare example of temporally regulated frameshifting, while the finding that –1 PRF efficiency at the  
1008 ORF1a/1b overlap also increased over time challenges the paradigm that RNA structure-directed  
1009 frameshift sites operate at a fixed efficiency. At the transcriptional level, numerous non-canonical

1010 transcripts were characterised, some of which bear similarities to those found in other nidoviruses.  
1011 Among these transcripts, the ORF1b sgRNAs and the heteroclitite sgRNAs encode portions of the  
1012 polyprotein and may provide an additional method of regulating the stoichiometry of its components.  
1013 Further, some ORF1b sgRNAs likely facilitate the surprisingly high levels of translation we observed  
1014 for several novel ORFs overlapping ORF1b. Although there is no evidence that these overlapping ORFs  
1015 produce functional proteins, the lability in the translome that is afforded by the heterogeneous  
1016 transcriptome potentially paves the way for similar ORFs to gain functions and become fixed in the  
1017 viral population. Further expanding the PRRSV translome, a short but highly translated uORF was  
1018 discovered in the NA PRRSV 5' UTR, the presence of which is highly conserved. This presents another  
1019 opportunity for regulation of viral translation, potentially allowing adaptation in response to infection-  
1020 induced cellular stress. This is the most comprehensive analysis of PRRSV gene expression to date, and  
1021 presents new paradigms for understanding arterivirus gene expression and the wider field of  
1022 programmed ribosomal frameshifting, with potential ramifications for a range of viruses.

## 1023 **Materials and methods**

### 1024 **Cells and viruses**

1025 For EU PRRSV infections, MA-104 cells were infected with a PRRSV strain derived from the Porcilis®  
1026 vaccine strain (MSD Animal Health; GenBank accession OK635576). Confluent 6 cm<sup>2</sup> dishes of MA-  
1027 104 cells were infected at a multiplicity of infection (MOI) within the range 1–3. At 0 (mock), 8, 12,  
1028 21 and 25 hpi, cycloheximide (Sigma-Aldrich) was added to the medium (final concentration 100  
1029 µg/ml) and incubated for 2 min. Cells were rinsed with 5 ml of ice cold PBS, placed on ice, and 400 µl  
1030 lysis buffer (20 mM Tris pH 7.5, 150 mM NaCl, 5 mM MgCl<sub>2</sub>, 1 mM DTT, 1% Triton X-100, 100  
1031 µg/ml CHX and 25 U/ml TURBO™ DNase [Life Technologies]) added drop-wise. Cells were scraped  
1032 off the plate and triturated 10 times with a 26-G needle, before cell debris was removed by  
1033 centrifugation (13,000 g, 4°C, 20 min) and the supernatant harvested and stored at –70°C.

1034 For NA PRRSV infections, confluent 10 cm<sup>2</sup> dishes of MARC-145 cells were infected with NA PRRSV  
1035 isolate SD95-21 (GenBank accession KC469618.1), a previously characterised mutant (KO2) based on  
1036 this background<sup>23,24,32</sup>, or mock-infected. At the time of harvesting for the timecourse samples, cells  
1037 were washed with warm PBS and snap-frozen in liquid nitrogen. For the CHX pre-treated library (CHX-  
1038 9hpi-WT), an additional CHX pre-treatment step (100 µg/ml, 2 min) was included directly prior to  
1039 harvesting, and cells were washed with ice cold PBS containing 100 µg/ml CHX before snap-freezing.  
1040 Snap-frozen dishes were transferred to dry ice and 400 µl lysis buffer added. The dish was transferred  
1041 to ice to defrost, and cells were scraped and processed as described above.

## 1042 **Western blotting**

1043 Samples were resolved by 15% SDS-PAGE and transferred to 0.2 µm nitrocellulose membranes.  
1044 Membranes were blocked with 5% Marvel milk powder (milk) dissolved in PBS (1 h, 25°C). Primary  
1045 antibodies were diluted in 5% milk, PBS, 0.1% Tween-20 and incubated with membranes (1 h, 25°C).  
1046 After three washes in PBS, 0.1% Tween-20, membranes were incubated with IRDye fluorescent  
1047 antibodies in 5% milk, PBS, 0.1% Tween-20 (1 h, 25°C). Membranes were washed three times in PBS,  
1048 0.1% Tween-20 and rinsed in PBS prior to fluorescent imaging with an Odyssey CLx platform (LI-  
1049 COR). Antibodies used were mouse monoclonal anti-NA-nsp1β (1/1000) and anti-EU-nsp1β (1/500),  
1050 mouse IgM monoclonal anti-GAPDH (1/20,000, clone G8795, Sigma-Aldrich), goat anti-mouse IRDye  
1051 800 CW (1/10,000, LI-COR), and goat anti-mouse IgM (µ chain specific) IRDye 680RD (1/10,000, LI-  
1052 COR).

## 1053 **Ribosome profiling library preparation**

1054 Ribosome profiling and RNASeq libraries were prepared as described in Irigoyen *et al.*<sup>49</sup> using a  
1055 protocol derived from Refs.<sup>52,65,152,153</sup>, with the following modifications. For RiboSeq libraries, RNase  
1056 I (Ambion) was added to final concentration 2.7, 3, 5, 4.17, 3.33, 2.5, or 2.5 U/µl for 3 hpi, 6 hpi, 9 hpi  
1057 replicate 1, 9 hpi replicates 2–4, 12 hpi, CHX-9hpi-WT, and EU libraries, respectively, and SUPERase-



1058 In RNase inhibitor (Invitrogen) scaled accordingly (amounts adjusted to improve phasing). The range  
1059 of fragment sizes selected during the first polyacrylamide gel purification was 25–34 nt (9 hpi replicate  
1060 1 RiboSeq and RNASeq libraries, all EU libraries, CHX-9hpi-WT), 19–80 nt (9 hpi replicate 2 RiboSeq  
1061 libraries), 19–34 nt (all other RiboSeq libraries), or ~50 nt (all other RNASeq libraries), and subsequent  
1062 gel slices were adjusted accordingly. The greater length range of 9 hpi replicate 2 RiboSeq libraries was  
1063 selected to investigate the potential presence of long fragments protected by disomes or stable  
1064 structures/complexes at frameshift sites (analyses not included herein due to inconclusive results).  
1065 Ribosomal RNA depletion was carried out solely using the RiboZero Gold Human/Mouse/Rat kit  
1066 (Illumina). Adapter sequences were based on the TruSeq small RNA sequences (Illumina) and, for most  
1067 libraries, additional randomised bases were added to the end destined for ligation: seven randomised  
1068 bases on both adapters for all NA PRRSV libraries, no randomised bases on EU PRRSV replicate 1, 14  
1069 randomised bases on the 3' adapter for EU PRRSV replicate 2. Randomised bases allow identification  
1070 of PCR duplicates and are expected to reduce technical biases. Libraries were deep sequenced as a  
1071 single-end run on the NextSeq 500 platform (Illumina), or a paired-end run using a Mid Output v2 kit  
1072 (150 cycles: 2x75) for 9 hpi replicate 2 RiboSeq libraries. Data are available on ArrayExpress under  
1073 accession numbers E-MTAB-10621, E-MTAB-10622 and E-MTAB-10623.

#### 1074 **Core analysis pipeline**

1075 For single-end libraries, fastx\_clipper (FASTX Toolkit version 0.0.14, parameters: -Q33 -l 33 -c -n -v)  
1076 was used to trim the universal adapter sequence from reads and to discard adapter-only reads, non-  
1077 clipped reads, and “too-short” reads (inferred original fragment lengths shorter than the minimum  
1078 intended length experimentally purified – see library preparation description for lengths). Adapter  
1079 dimers were counted using the grep command line utility and added to the adapter-only read count. For  
1080 paired-end libraries, adapter trimming, read pair merging and removal of adapter-only reads was carried  
1081 out using LeeHom<sup>154</sup> (v.1.1.5) with the --ancient-dna option specified (as the expected fragment lengths  
1082 of such DNA are in the same range as ours). Pairs of reads which LeeHom was unable to merge were

1083 put in the “non-clipped” category for the purposes of library composition analysis, and “too-short” reads  
1084 were removed using awk. For libraries prepared using adapters with randomised bases, PCR duplicates  
1085 were removed using awk, and seqtk (version 1.3) was used to trim the randomised bases from the reads.  
1086 Bowtie1 (version 1.2.3)<sup>[155]</sup> was used to map reads to host and viral genomes using parameters “-v  
1087 n\_mismatches --best”, where n\_mismatches was one for RiboSeq and two for RNASeq libraries. Reads  
1088 were mapped to each of the following databases in order and only reads that failed to align were mapped  
1089 to the next database: ribosomal RNA (rRNA), virus RNA (vRNA), mRNA, non-coding RNA (ncRNA),  
1090 genomic DNA (gDNA). Viral genome sequences were verified by *de novo* genome assembly using  
1091 Trinity (version 2.9.1). The rRNA database comprised the following GenBank accessions:  
1092 NR\_003287.2, NR\_023379.1, NR\_003285.2, NR\_003286.2, AY603036.1, AF420058.1, AF420040.1,  
1093 AY633510.1, AF352382.1, L35185.1, DQ983926.1, KJ193255.1, M30951.1, M30950.1, M30952.1,  
1094 KJ193272.1, KJ193259.1, KJ193258.1, KJ193256.1, KJ193255.1, KJ193045.1, KJ193042.1,  
1095 KJ193044.1, KJ193041.1, KJ193019.1, KJ193018.1, KJ193017.1 and AF420040.1. The mRNA  
1096 database was compiled from the available *Chlorocephus sabaeus* RefSeq mRNAs after removing  
1097 transcripts with annotated changes in frame. The ncRNA database was  
1098 *Chlorocephus\_sabaeus*.ChlSab1.1.ncrna.fa and the gDNA database was the ChlSab1.1 genome  
1099 assembly, both from Ensembl. The position of vRNA within the database mapping order was altered to  
1100 confirm that significant numbers of viral reads were not erroneously mapping to host databases or *vice*  
1101 *versa*. All analyses were carried out using reads mapped by bowtie as described above, except for  
1102 running PRICE, analyses using junction-spanning reads, or host differential gene expression.

1103 Quality control plots and analyses were performed as described in Irigoyen *et al.*<sup>49</sup>, modified for the  
1104 timecourse libraries to account for the longer RNASeq reads, so that a 3' UTR of at least 90 nt (as  
1105 opposed to 60 nt) was required for inclusion of transcripts in the metagene analysis of 5' end positions  
1106 relative to start and stop codons (Supplementary Figure 1). For quality control analyses of read length  
1107 and phasing, reads mapping to ORF1ab (excluding nsp2TF, all phases) were used for the virus versus  
1108 host analyses (e.g. Figure 1C, Supplementary Figure 2), while for analyses of specific regions (e.g.

1109 Supplementary Figures 3 and 4), overlapping regions of ORFs were permitted for the length distribution  
1110 but not phasing analyses. For these phasing plots, phase 0 was designated independently for each region,  
1111 relative to the first nucleotide of the ORF in that region. For the negative-sense read analysis, reads  
1112 mapping to anywhere on the viral genome were used, and phase was determined using the 5' end of the  
1113 read (the 5' end of the reverse complement reported by bowtie plus the read length). The coordinates of  
1114 the regions of the viral genome used for all analyses are given in Supplementary Table 1.

1115 For plots of read distributions on viral genomes, read densities were plotted at the inferred ribosomal P  
1116 site position, obtained by applying a static +12 nt offset to the 5' end coordinate of the read (applied to  
1117 both RiboSeq and RNASeq for comparability although ribosomal P site is not relevant to RNASeq  
1118 reads). For Supplementary Figure 23, species-specific tRNA adaptation index (stAI) values for *Macaca*  
1119 *mulatta* (in the absence of *C. sabaesus* data) were obtained from STADIUM<sup>156</sup> on 4<sup>th</sup> Oct 2020, and a  
1120 heatmap constructed using the minimum and maximum values for *M. mulatta* codons as the most  
1121 extreme colours available in the gradient. For plots of the percentage of reads in each phase across  
1122 ORF1a, positive-sense RiboSeq reads were separated according to phase and a 183-codon running mean  
1123 filter applied to avoid any instances of zero across ORF1a (excluding the halfwindow at each end) after  
1124 sliding window application. From this, the percentage of reads in each phase at each codon in-frame  
1125 with ORF1a was calculated. All plots and analyses use RiboSeq read lengths identified as having  
1126 minimal RNP contamination (Supplementary Figures 4 and 12F) unless otherwise specified.

### 1127 **Significance testing for proportion of host RPFs which are short**

1128 RiboSeq libraries were grouped into early (3 and 6 hpi) and late (9 and 12 hpi) timepoints, to provide  
1129 enough replicates in each group to perform a two-tailed *t* test (WT and KO2 were treated as equivalent).  
1130 Positive-sense RPFs mapping to host mRNA were used, and short reads were defined as 19–24 nt long,  
1131 with the denominator formed by 19–34 nt long reads. The early timepoint group was used as a control,  
1132 for which there was no significant difference in the percentage of short RPFs in infected cells compared  
1133 to mock-infected cells ( $p = 0.52$ ).

## 1134 **Junction-spanning read analysis for novel transcript discovery**

1135 Reads which did not map to any of the host or viral databases (rRNA, vRNA, mRNA, ncRNA or gDNA)  
1136 in the core pipeline (described above) were used as input for mapping using STAR<sup>60</sup>, version 2.7.3a.  
1137 Mapping parameters were selected based on those suggested in Kim *et al.*<sup>46</sup> to switch off penalties for  
1138 non-canonical splice junctions:

```
1139 --runMode alignReads --outSAMtype BAM SortedByCoordinate --outFilterType BySJout  
1140 --outFilterMultimapNmax 2 --alignSJoverhangMin 12 --outSJfilterOverhangMin 12 12 12 12  
1141 --outSJfilterCountUniqueMin 1 1 1 1 --outSJfilterCountTotalMin 1 1 1 1  
1142 --outSJfilterDistToOtherSJmin 0 0 0 0 --outFilterMismatchNmax 2 --scoreGapNoncan -4  
1143 --scoreGapATAC -4 --chimOutType Junctions --chimScoreJunctionNonGTAG 0 --alignEndsType  
1144 EndToEnd --alignSJstitchMismatchNmax -1 -1 -1 -1 --alignIntronMin 20 --alignIntronMax 1000000  
1145 --outSAMattributes NH HI AS nM jM jI
```

1146 First, junctions were processed within each library. To avoid junction clusters becoming inflated, late  
1147 timepoint libraries (8 hpi onwards) were filtered to remove junctions with fewer than four supporting  
1148 reads. Reads were split into two categories, TRS-spanning and non-TRS-spanning, according to  
1149 whether the donor site of the junction overlapped the leader TRS (genomic coordinates in  
1150 Supplementary Table 1). Junctions were clustered so that all junctions within a cluster had acceptor  
1151 coordinates within seven (for TRS-spanning junctions) or two (for non-TRS-spanning junctions)  
1152 nucleotides of at least one other junction in the cluster, with the same requirement applied to donor  
1153 coordinates. This was to group highly similar junctions together and account for the fact that the precise  
1154 location of a junction is ambiguous in cases where there is similarity between the donor and acceptor  
1155 sites (such as between the 6-nt leader and body TRSs). The junctions within each cluster were merged,  
1156 with donor and acceptor sites defined as the midpoints of the ranges of coordinates observed in the  
1157 cluster, and the number of reads supporting the merged junction defined as the sum of the supporting  
1158 read counts for all the input junctions in the cluster.

1159 Then, junctions were filtered to keep only those present in multiple libraries and merged to generate  
1160 one dataset per timepoint. Merged junctions from individual libraries were filtered so that only junctions  
1161 which were present in more than one replicate (considering WT and KO2 as one group) passed the  
1162 filter. Junctions were defined as matching if the ranges of the donor and acceptor coordinates for the  
1163 junction in one library overlap with those of a junction in a second library. Matching junctions from all  
1164 replicates were merged as described above to make the final merged junction. For the NA PRRSV M  
1165 junction there is a stretch of six bases that is identical upstream of the leader TRS and the body TRS,  
1166 leading to separation of the two alternative junction position assignments by a distance greater than the  
1167 seven bases required to combine TRS-spanning junctions into clusters. The two junction clusters that  
1168 are assigned either side of this stretch of identical bases were specifically selected and merged at this  
1169 stage. To ensure this merging strategy did not lead to clusters spanning overly wide regions, widths of  
1170 merged junction donor and acceptor sites were assessed, and the mean and median junction width for  
1171 all analyses was found to be < 3 nt (maximum width 17 nt, for the NA PRRSV M junction). TRS-  
1172 spanning junctions were designated as “known” junctions if they were the major junction responsible  
1173 for one of the known canonical sgRNAs of PRRSV. Non-TRS-spanning junctions were filtered  
1174 according to whether they represent local ( $\leq 2000$  nt) or distant ( $> 2000$  nt) deletions.

1175 The proportion of junction-spanning reads at donor and acceptor sites was calculated as junction-  
1176 spanning / (junction-spanning + continuously aligned to reference genome). The number of non-  
1177 junction-spanning reads at the junction site was defined as the number of bowtie-aligned reads (from  
1178 the core pipeline) spanning at least the region 12 nt either side of the midpoint position of the donor or  
1179 acceptor site (note that for sgRNA acceptor sites the denominator will include not only gRNA but also  
1180 sgRNAs with body TRSs upstream). For all TRS-spanning junctions the donor midpoint was set  
1181 according to the known leader TRS sequence (genomic coordinate 188 for NA PRRSV and 219 for EU  
1182 PRRSV).

## 1183 **Detection of novel viral ORFs**

1184 Novel ORF discovery was performed using PRICE<sup>64</sup> (version 1.0.3b). A custom gtf file was made for  
1185 each virus, with only the gRNA transcript and ORF1b CDS annotated. Other known viral ORFs were  
1186 not annotated and served as positive controls. The custom viral gtf files were each individually  
1187 concatenated with the host gtf file (ChlSab1.1.101, downloaded from Ensembl) to make the input of  
1188 known ORFs (treating the viral genome as an additional host chromosome). The reference fasta files  
1189 for the host and viruses were similarly concatenated to make the input reference sequences. RiboSeq  
1190 reads were mapped to these combined references using STAR<sup>60</sup>, version 2.7.3a, with parameters as  
1191 described for novel transcript discovery but with the following changes:  
1192 `--outFilterType Normal --outFilterMultimapNmax 10 --outFilterMismatchNmax 1 --chimOutType`  
1193 `WithinBAM --outSAMattributes MD NH HI AS nM jM jI`

1194 The STAR alignments were used as input for PRICE, and *p* values were corrected for multiple testing  
1195 using the Benjamini-Hochberg method before filtering results to select significant viral ORFs. For  
1196 noCHX NA PRRSV libraries, read lengths with minimal RNP contamination were used, while for EU  
1197 PRRSV libraries all read lengths were used. The CHX NA PRRSV library was not used for PRICE, as  
1198 CHX pre-treatment can artefactually increase uORF translation<sup>157</sup>.

## 1199 **Analysis of sequence conservation**

1200 Sequences were selected for inclusion in the alignment based on a requirement for  $\geq 50\%$  amino acid  
1201 identity (across all ORFs excluding overlapping regions),  $\geq 70\%$  nucleotide identity and  $\geq 95\%$   
1202 coverage compared with the prototype NA (NC\_001961) or EU (NC\_043487) PRRSV reference  
1203 genomes, resulting in 661 and 120 sequences, respectively. For analyses of NA PRRSV genomes  
1204 “representative of NA PRRSV diversity”, the NA PRRSV sequences were clustered using CD-HIT<sup>158</sup>  
1205 (version 4.8.1) based on the whole genome and with a nucleotide similarity threshold of 95% (all other  
1206 parameters set to default), and one representative sequence from each cluster was selected to make a



1207 sequence alignment of 137 sequences. Logo plots and mini-alignment plots were generated using  
1208 CIAAlign<sup>68</sup> and, for the uORF analyses, genome sequences which began partway through the ORF were  
1209 excluded, as was KT257963 which has a likely sequencing artefact in the 5' UTR. Synonymous site  
1210 conservation was analysed, for the representative NA PRRSV sequences or for all EU sequences, using  
1211 SYNLOT2<sup>[67]</sup> and *p* values plotted after application of a 25-codon running mean filter.

## 1212 **Transcript abundance, total translation, and translation efficiency analyses**

1213 For the main analysis, RiboSeq RPKM values were calculated using the read counts and ORF  
1214 “Location”s from the PRICE output (Supplementary Table 8), using the same library size normalisation  
1215 factors as the core pipeline (where positive-sense virus- and host-mRNA-mapping reads from the  
1216 bowtie output are the denominator). Each ORF was paired with the transcript(s) most likely to facilitate  
1217 its expression (see schematic in Figure 7 and junction coordinates in Supplementary Tables 1 and 5–7).  
1218 For some ORFs (NA PRRSV nsp10-iORF2, nsp11-iORF3, GP3-iORF and GP4-iORF), this included  
1219 transcripts which are expected to produce slightly N-terminally truncated ORFs compared to the PRICE  
1220 designation. ORFs overlapping ORF1ab for which there were no novel transcripts expected to facilitate  
1221 expression were paired with gRNA. All ORF1b sgRNAs, defined as sgRNAs with body TRSs within  
1222 ORF1b and  $\geq 50$  or  $\geq 10$  junction-spanning reads at 12 hpi (NA PRRSV) or 8 hpi (EU PRRSV), were  
1223 included in the transcript abundance analysis regardless of whether they are expected to result in  
1224 expression of a novel ORF.

1225 To estimate transcript abundance, reads aligned to the viral genome by STAR (see junction-spanning  
1226 read analysis pipeline) were normalised by library size using the same library size normalisation factors  
1227 as the core pipeline. In cases where multiple body TRSs are expected to give rise to two different forms  
1228 of a transcript that express the same ORF(s), these were treated as a single transcript for the purposes  
1229 of this analysis, and read counts for all junctions were combined. Abundance of the gRNA transcript  
1230 was defined as the number of reads which span 12 nt either side of the midpoint of the leader TRS  
1231 (genomic coordinate 188 for NA PRRSV and 291 for EU PRRSV). This is analogous to the 12-nt

1232 overhang required either side of a junction to qualify for mapping by STAR; however, these reads are  
1233 not junction-spanning, and map specifically to gRNA (and a small proportion of non-canonical  
1234 transcripts such as heteroclite sgRNAs). Leader abundance was defined as the total number of reads for  
1235 all other transcripts in the analysis combined, as the leader is present on all sgRNA species and the  
1236 gRNA. TE was calculated by dividing RiboSeq RPKM values by RNASeq junction-spanning read RPM  
1237 values, excluding conditions where the denominator was zero.

1238 For plots with logarithmic axes, data points with a value of zero were excluded from the plot, but not  
1239 from mean calculations. WT and KO2 were treated as equivalent unless specified. For libraries with  
1240 shorter read lengths (EU libraries and NA 9 hpi replicate 1 libraries) junction-spanning read counts are  
1241 lower (and also subject to greater inaccuracies as a result of less dilution of possible read start- and end-  
1242 point specific ligation biases) due to the requirement for a 12-nt overhang either side of the junction  
1243 effectively representing a much larger proportion of the total read length. As such, these libraries are  
1244 not directly comparable to the remaining NA PRRSV libraries and they were plotted separately and not  
1245 included in NA PRRSV mean calculations.

1246 For the estimation of translation of different regions of ORF1b, sections were designated as the regions  
1247 between the downstream-most body TRS of one ORF1b sgRNA and the upstream-most body TRS of  
1248 the next (all region coordinates given in Supplementary Table 1). Bowtie-aligned RiboSeq reads (from  
1249 the core pipeline) which mapped in-phase with ORF1b in the designated regions were counted, using  
1250 only read lengths with minimal RNP contamination (NA PRRSV) or good phasing (EU PRRSV). Total  
1251 read counts were normalised by library size and region length to give RPKM. The same process was  
1252 applied to the region of ORF1a between the major heteroclite junction and the nsp2 PRF site for  
1253 comparison, counting reads mapping in-phase with ORF1a.

1254 For investigation of gene expression in different regions of ORF1a, transcript abundance for the  
1255 heteroclite sgRNAs was calculated by subtracting the gRNA RNASeq RPKM (measured in the region  
1256 between the major [S-2] heteroclite sgRNA junction and the first ORF1b sgRNA body TRS) from the  
1257 RPKM in the region between the leader TRS and the major heteroclite sgRNA junction (“heteroclite”).

1258 This provides an averaged result for all heteroclitite sgRNAs, although it does not take into account the  
1259 reduced transcript length for the minor heteroclitite sgRNAs compared to S-2. RiboSeq read density for  
1260 the different regions of ORF1a (Supplementary Table 1) was calculated as described above for sections  
1261 of ORF1b. For TE of the heteroclitite region, the denominator was both gRNA and (decumulated)  
1262 heteroclitite sgRNAs combined.

### 1263 **Nsp2 site PRF efficiency calculations based on phasing**

1264 The proportion of reads in each phase in the upstream and transframe regions (coordinates in  
1265 Supplementary Table 1) was calculated, where in both regions phase is taken relative to the ORF1a  
1266 reading frame. It was assumed that all ribosomes in the upstream region were translating in the 0 frame,  
1267 and the phase distribution in this region was used to estimate what proportion of 0-frame ribosomes  
1268 generate reads attributed to the 0 phase ( $upstream_0$ ) and the -2 phase ( $upstream_{-2}$ ). This was  
1269 extrapolated to determine what proportion of reads are expected to be in the -2 phase in the transframe  
1270 region ( $transframe_{-2}$ ) in the absence of frameshifting (which is expected to be the same as in the  
1271 upstream region). A proportion (FS\_proportion) of ribosomes undergoing -2 PRF is expected to mean  
1272 that, between the upstream and downstream region, FS\_proportion of phase 0 reads change from the 0  
1273 to the -2 phase and FS\_proportion of -2 phase reads move to the -1 phase (leaving  $1 - FS\_proportion$   
1274 in the -2 phase). These concepts were combined to make the equation:

$$1275 \quad transframe_{-2} = (FS\_proportion \times upstream_0) + (1 - FS\_proportion) \times upstream_{-2}$$

1276 This was rearranged to calculate percentage frameshift efficiency (which is FS\_proportion expressed  
1277 as a percentage):

$$1278 \quad FS\_efficiency = 100 \times (transframe_{-2} - upstream_{-2}) / (upstream_0 - upstream_{-2})$$

1279 This phasing-based method of calculating frameshift efficiency should theoretically be unaffected by  
1280 RNP contamination, provided the RNP footprints are equally distributed between the three phases. Let  
1281 R be the proportion of total reads that are RNPs, and let  $P_0$  and  $P_{-2}$  be the proportion of total RNPs that

1282 are attributed to the 0 and -2 phases, respectively. The phasing of reads originating from RNPs is not  
1283 expected to change due to frameshifting. Therefore, the equation for calculating the fraction of reads  
1284 that change from the 0 to -2 phase becomes:

$$1285 \quad \text{FS\_proportion} \times (\text{upstream}_0 - \text{RP}_0)$$

1286 and the equation for calculating the fraction of reads that remain in the -2 phase becomes:

$$1287 \quad \text{RP}_{-2} + [(1 - \text{FS\_proportion}) \times (\text{upstream}_{-2} - \text{RP}_{-2})]$$

1288 Combining these makes the equation:

$$1289 \quad \text{transframe}_{-2} = \text{FS\_proportion} \times [\text{upstream}_0 - \text{RP}_0] + \text{RP}_{-2} + [(1 - \text{FS\_proportion}) \times (\text{upstream}_{-2} - \\ 1290 \quad \text{RP}_{-2})]$$

1291 This rearranges to:

$$1292 \quad \text{FS\_proportion} = (\text{upstream}_{-2} - \text{transframe}_{-2}) / (\text{RP}_0 - \text{upstream}_0 - \text{RP}_{-2} + \text{upstream}_{-2})$$

1293 If  $P_0 = P_{-2}$  (for example if RNPs are equally distributed between all three phases) then this causes both  
1294 terms involving R to cancel out of the equation, meaning RNPs would not affect the result. The same  
1295 would hold for any other form of uniform non-phased contamination.

1296 For NA PRRSV libraries, read lengths identified as having minimal RNP contamination (indicated in  
1297 Supplementary Figure 4) were used and, for EU PRRSV, read lengths with good phasing  
1298 (Supplementary Figure 6D) were used.

### 1299 **Nsp2 site PRF efficiency calculations based on KO2-normalised read density**

1300 The density normalisation-based method calculates frameshift efficiency as  $100 \times [1 -$   
1301  $(\text{downstream}/\text{upstream})]$ , where downstream and upstream represent the RPKM values for the  
1302 respective regions after normalisation of WT density by the density in its KO2 counterpart. WT and  
1303 KO2 libraries were paired first according to processing batches, and within each batch (if there were  
1304 multiple replicates) the WT library with the higher ratio of virus:host RiboSeq reads was paired with

1305 the KO2 library with the higher ratio. This resulted in libraries with the same replicate number being  
1306 paired, except 9 hpi WT-3 was paired with KO2-4, and WT-4 with KO2-3. For RiboSeq libraries, read  
1307 lengths identified as having minimal RNP contamination (indicated in Supplementary Figure 4) were  
1308 used, whereas for RNASeq negative control libraries all read lengths were used. This method could not  
1309 be applied to EU PRRSV libraries as no KO2 libraries were made.

### 1310 **ORF1ab site PRF efficiency calculations**

1311 Frameshift efficiency was calculated as  $100 \times (\text{downstream/upstream})$ , where downstream and  
1312 upstream represent the RPKM values for the respective regions. Mutation of this frameshift site  
1313 prevents viral replication so normalisation by a frameshift-defective mutant was not possible. KO2 and  
1314 WT libraries were treated as equivalent for the calculations and statistical tests. For NA PRRSV  
1315 RiboSeq libraries, read lengths identified as having minimal RNP contamination (indicated in  
1316 Supplementary Figure 4) were used, and for EU PRRSV RiboSeq libraries read lengths with good  
1317 phasing (Supplementary Figure 6D) were used. For all RNASeq negative control libraries, all read  
1318 lengths were used. A two-tailed Mann-Whitney U test was employed to assess statistical significance  
1319 of differences between groups of observed values.

### 1320 **Bootstrap resampling for phasing-based nsp2 -2 PRF frameshift efficiency calculations**

1321 100,000 randomised resamplings of codons in each respective region were performed. Each WT library  
1322 was paired with its corresponding KO2 library (as described above), with matched codons selected for  
1323 the two libraries in each resampling, and reads with 5' ends mapping to these codons were used as input  
1324 for the PRF efficiency calculations. Calculation of nsp2 -2 PRF efficiency for each resampling was  
1325 performed using the phasing-based method as described above, with the results of individual libraries  
1326 recorded, and then the mean of all libraries in each group calculated. Regions and bounding coordinates  
1327 used were as described above, with an additional 147-codon downstream region (the same length as the  
1328 region of nsp2TF used) added as a negative control (coordinates in Supplementary Table 1). For all

1329 resamplings,  $n$  codons were sampled with replacement, where  $n$  is the total number of codons in the  
1330 region undergoing resampling. Bootstrap resamplings were used to empirically determine  $p$  values.  
1331 Confidence intervals for each bootstrap distribution were calculated using the bias-corrected accelerated  
1332 (BCa) method, implemented through the R package `coxed` (version 0.3.3). This was performed for 95%,  
1333 99.5% and 999.5% confidence intervals, and pairs of groups were considered as significantly different  
1334 with  $p < 0.05$ , 0.005 or 0.005, respectively, if the mean of the "group one" bootstrap distribution was  
1335 not within the confidence intervals of "group two" and *vice versa*.

### 1336 **Host differential gene expression**

1337 After basic processing and removal of rRNA- and vRNA-mapping reads using bowtie as described in  
1338 the core analysis pipeline, remaining reads were aligned to the host genome (fasta and gtf from genome  
1339 assembly ChlSab1.1) using STAR<sup>60</sup> (version 2.7.3a) with the following parameters: `--runMode`  
1340 `alignReads --outSAMtype BAM SortedByCoordinate --outFilterMismatchNmax n_mismatches`  
1341 `--outFilterIntronMotifs RemoveNoncanonicalUnannotated --outMultimapperOrder Random` (where  
1342 `n_mismatches` was one for RiboSeq libraries and two for RNASeq libraries). Reads were tabulated  
1343 using `htseq-count`<sup>159</sup> (version 0.13.5), with parameters `-a 0 -m union -s yes -t gene` (covering the whole  
1344 gene) for the differential transcription and `-a 0 -m intersection-strict -s yes -t CDS` (covering only the  
1345 CDS) for the differential TE. Genes with fewer than ten reads between all libraries in the analysis  
1346 combined were excluded, and quality control was performed according to the recommendations in the  
1347 DESeq2<sup>185</sup> user guide, with all replicates deemed to be of sufficient quality. Read counts were  
1348 normalised for differences in library size using DESeq2 (version 1.30.1), providing the input for  
1349 differential transcription using DESeq2 (default parameters) or differential TE using `xtail`<sup>84</sup> (version  
1350 1.1.5; parameters: `normalize = FALSE`). Shrinkage was applied to the DESeq2 output using `lfcShrink`  
1351 (parameters: `type = "normal"`). Where necessary (i.e. for the KO2 vs WT comparison), `fdrtool` was used  
1352 to correct conservative  $p$  values for differential transcription (version 1.2.16; parameters: `statistic =`  
1353 `"normal"`), in addition to the Benjamini-Hochberg correction for multiple testing. This correction could

1354 not be applied to the xtail results as the test statistic is not included in the xtail output. Genes were  
1355 considered significantly differentially expressed if they had FDR-corrected  $p$  value  $\leq 0.05$  and  $\log_2$ (fold  
1356 change) of magnitude  $> 1$  (for comparisons to mock) or  $> 0.7$  (for KO2 vs WT comparison). GO terms  
1357 associated with lists of significantly differentially expressed genes were retrieved and tested, using  
1358 DAVID<sup>160</sup> (version 6.8, functional annotation chart report, default parameters), for enrichment against  
1359 a background of GO terms associated with all genes that passed the threshold for inclusion in that  
1360 differential expression analysis.

## 1361 **Acknowledgements**

1362 This work was supported by the Wellcome Trust (U.K.) through PhD studentships to G.M.C.  
1363 (203864/Z/16/Z) and L.S. (102163/Z/13/Z), Senior Research Fellowships to A.E.F. (106207/Z/14/Z,  
1364 220814/Z/20/Z) and an Investigator Award (202797/Z/16/Z) to I.B. Additional support was from a  
1365 European Research Council grant (646891; to A.E.F.) and an Agriculture and Food Research Initiative  
1366 Competitive Grant (2015-67015-22969; to Y.F.) from the USDA National Institute of Food and  
1367 Agriculture. We would like to thank Dr David Brown for supporting discussions.

## 1368 **Author contributions**

1369 G.M.C. and L.S. performed the ribosome profiling and biochemical experiments. G.M.C., P.S., Y.L.,  
1370 L.S., A.M., Y.F. and I.B. carried out virus infections. Bioinformatic analysis was carried out by G.M.C.,  
1371 K.B., L.S., A.M.D., C.T. and A.E.F. G.M.C, A.E.F. and I.B. wrote the manuscript with contributions  
1372 from all authors.



1373 **Competing interests**

1374 The authors declare no competing interests.

1375 **References**

- 1376 1. Meulenberg, J. J. *et al.* Lelystad virus belongs to a new virus family, comprising lactate  
1377 dehydrogenase-elevating virus, equine arteritis virus, and simian hemorrhagic fever virus. *Arch.*  
1378 *Viol. Suppl.* **9**, 441–448 (1994).
- 1379 2. Cavanagh, D. Nidovirales: a new order comprising Coronaviridae and Arteriviridae. *Arch. Virol.*  
1380 **142**, 629–633 (1997).
- 1381 3. Nan, Y. *et al.* Improved vaccine against PRRSV: Current Progress and future perspective.  
1382 *Frontiers in Microbiology* **8**, 1635 (2017).
- 1383 4. Holtkamp, D. J. *et al.* Assessment of the economic impact of porcine reproductive and  
1384 respiratory syndrome virus on United States pork producers. *Journal of Swine Health and*  
1385 *Production* **21**, 72–84 (2013).
- 1386 5. Kappes, M. A. & Faaberg, K. S. PRRSV structure, replication and recombination: Origin of  
1387 phenotype and genotype diversity. *Virology* **479–480**, 475–486 (2015).
- 1388 6. Collins, J. E. *et al.* Isolation of swine infertility and respiratory syndrome virus (isolate ATCC  
1389 VR-2332) in North America and experimental reproduction of the disease in gnotobiotic pigs.  
1390 *J. Vet. Diagnostic Investig.* **4**, 117–126 (1992).
- 1391 7. Wensvoort, G. *et al.* Mystery swine disease in The Netherlands: the isolation of Lelystad virus.  
1392 *Vet. Q.* **13**, 121–130 (1991).
- 1393 8. Guo, Z., Chen, X. X., Li, R., Qiao, S. & Zhang, G. The prevalent status and genetic diversity of  
1394 porcine reproductive and respiratory syndrome virus in China: A molecular epidemiological

- 1395 perspective. *Virology Journal* **15**, (2018).
- 1396 9. Snijder, E. J., Kikkert, M. & Fang, Y. Arterivirus molecular biology and pathogenesis. *Journal*  
1397 *of General Virology* **94**, 2141–2163 (2013).
- 1398 10. Posthuma, C. C., te Velhuis, A. J. W. & Snijder, E. J. Nidovirus RNA polymerases: Complex  
1399 enzymes handling exceptional RNA genomes. *Virus Research* **234**, 58–73 (2017).
- 1400 11. Meulenberg, J. J. M. *et al.* Lelystad virus, the causative agent of porcine epidemic abortion and  
1401 respiratory syndrome (PEARS), is related to LDV and EAV. *Virology* **192**, 62–72 (1993).
- 1402 12. Nelsen, C. J., Murtaugh, M. P. & Faaberg, K. S. Porcine Reproductive and Respiratory  
1403 Syndrome Virus Comparison: Divergent Evolution on Two Continents. *J. Virol.* **73**, 270–280  
1404 (1999).
- 1405 13. Snijder, E. J., Wassenaar, A. L. & Spaan, W. J. Proteolytic processing of the replicase ORF1a  
1406 protein of equine arteritis virus. *J. Virol.* **68**, 5755–64 (1994).
- 1407 14. Gorbalenya, A. E., Enjuanes, L., Ziebuhr, J. & Snijder, E. J. Nidovirales: Evolving the largest  
1408 RNA virus genome. *Virus Res.* **117**, 17–37 (2006).
- 1409 15. Rodnina, M. V *et al.* Survey and summary: Translational recoding: Canonical translation  
1410 mechanisms reinterpreted. *Nucleic Acids Res.* **48**, 1056–1067 (2020).
- 1411 16. Atkins, J. F., Loughran, G., Bhatt, P. R., Firth, A. E. & Baranov, P. V. Ribosomal frameshifting  
1412 and transcriptional slippage: From genetic steganography and cryptography to adventitious use.  
1413 *Nucleic Acids Res.* **44**, 7007–78 (2016).
- 1414 17. Firth, A. E. & Brierley, I. Non-canonical translation in RNA viruses. *Journal of General*  
1415 *Virology* **93**, 1385–1409 (2012).
- 1416 18. Plant, E. P. & Dinman, J. D. Torsional restraint: A new twist on frameshifting pseudoknots.  
1417 *Nucleic Acids Res.* **33**, 1825–1833 (2005).
- 1418 19. Namy, O., Moran, S. J., Stuart, D. I., Gilbert, R. J. C. & Brierley, I. A mechanical explanation

- 1419 of RNA pseudoknot function in programmed ribosomal frameshifting. *Nature* **441**, 244–247  
1420 (2006).
- 1421 20. Caliskan, N., Katunin, V. I., Belardinelli, R., Peske, F. & Rodnina, M. V. Programmed –1  
1422 Frameshifting by Kinetic Partitioning during Impeded Translocation. *Cell* **157**, 1619–1631  
1423 (2014).
- 1424 21. den Boon, J. A. *et al.* Equine arteritis virus is not a togavirus but belongs to the coronaviruslike  
1425 superfamily. *J. Virol.* **65**, 2910–20 (1991).
- 1426 22. Bekaert, M. & Rousset, J. P. An extended signal involved in eukaryotic -1 Frameshifting  
1427 operates through modification of the E site tRNA. *Mol. Cell* **17**, 61–68 (2005).
- 1428 23. Fang, Y. *et al.* Efficient -2 frameshifting by mammalian ribosomes to synthesize an additional  
1429 arterivirus protein. *Proc. Natl. Acad. Sci.* **109**, E2920–E2928 (2012).
- 1430 24. Li, Y. *et al.* Transactivation of programmed ribosomal frameshifting by a viral protein. *Proc.*  
1431 *Natl. Acad. Sci. U. S. A.* **111**, E2172-81 (2014).
- 1432 25. Naphtine, S. *et al.* A novel role for poly(C) binding proteins in programmed ribosomal  
1433 frameshifting. *Nucleic Acids Res.* **44**, 5491–5503 (2016).
- 1434 26. Li, Y. *et al.* Programmed –2/–1 Ribosomal Frameshifting in Simarteriviruses: an Evolutionarily  
1435 Conserved Mechanism. *J. Virol.* **93**, (2019).
- 1436 27. Han, J., Rutherford, M. S. & Faaberg, K. S. The Porcine Reproductive and Respiratory  
1437 Syndrome Virus nsp2 Cysteine Protease Domain Possesses both trans- and cis-Cleavage  
1438 Activities. *J. Virol.* **83**, 9449–9463 (2009).
- 1439 28. van Kasteren, P. B. *et al.* Arterivirus and Nairovirus Ovarian Tumor Domain-Containing  
1440 Deubiquitinases Target Activated RIG-I To Control Innate Immune Signaling. *J. Virol.* **86**, 773–  
1441 785 (2012).
- 1442 29. Frias-Staheli, N. *et al.* Ovarian Tumor Domain-Containing Viral Proteases Evade Ubiquitin- and

- 1443 ISG15-Dependent Innate Immune Responses. *Cell Host Microbe* **2**, 404–416 (2007).
- 1444 30. Sun, Z., Chen, Z., Lawson, S. R. & Fang, Y. The Cysteine Protease Domain of Porcine  
1445 Reproductive and Respiratory Syndrome Virus Nonstructural Protein 2 Possesses  
1446 Deubiquitinating and Interferon Antagonism Functions. *J. Virol.* **84**, 7832–7846 (2010).
- 1447 31. Sun, Z., Li, Y., Ransburgh, R., Snijder, E. J. & Fang, Y. Nonstructural Protein 2 of Porcine  
1448 Reproductive and Respiratory Syndrome Virus Inhibits the Antiviral Function of Interferon-  
1449 Stimulated Gene 15. *J. Virol.* **86**, 3839–3850 (2012).
- 1450 32. Li, Y. *et al.* Nonstructural proteins nsp2TF and nsp2N of porcine reproductive and respiratory  
1451 syndrome virus (PRRSV) play important roles in suppressing host innate immune responses.  
1452 *Virology* **517**, 164–176 (2018).
- 1453 33. Kappes, M. A., Miller, C. L. & Faaberg, K. S. Porcine reproductive and respiratory syndrome  
1454 virus nonstructural protein 2 (nsp2) topology and selective isoform integration in artificial  
1455 membranes. *Virology* **481**, 51–62 (2015).
- 1456 34. Snijder, E. J., Van Tol, H., Roos, N. & Pedersen, K. W. Non-structural proteins 2 and 3 interact  
1457 to modify host cell membranes during the formation of the arterivirus replication complex. *J.*  
1458 *Gen. Virol.* **82**, 985–994 (2001).
- 1459 35. Knoops, K. *et al.* Ultrastructural Characterization of Arterivirus Replication Structures:  
1460 Reshaping the Endoplasmic Reticulum To Accommodate Viral RNA Synthesis. *J. Virol.* **86**,  
1461 2474–2487 (2012).
- 1462 36. Guo, R. *et al.* A swine arterivirus deubiquitinase stabilizes two major envelope proteins and  
1463 promotes production of viral progeny. *PLOS Pathog.* **17**, e1009403 (2021).
- 1464 37. Patel, A. *et al.* Molecular characterization of the RNA-protein complex directing -2/-1  
1465 programmed ribosomal frameshifting during arterivirus replicase expression. *J. Biol. Chem.* **295**,  
1466 17904–17921 (2020).

- 1467 38. Loughran, G., Firth, A. E. & Atkins, J. F. Ribosomal frameshifting into an overlapping gene in  
1468 the 2B-encoding region of the cardiovirus genome. *Proc. Natl. Acad. Sci. U. S. A.* **108**, E1111  
1469 (2011).
- 1470 39. Finch, L. K. *et al.* Characterization of Ribosomal Frameshifting in Theiler's Murine  
1471 Encephalomyelitis Virus. *J. Virol.* **89**, 8580–8589 (2015).
- 1472 40. Napthine, S. *et al.* Protein-directed ribosomal frameshifting temporally regulates gene  
1473 expression. *Nat. Commun.* **8**, (2017).
- 1474 41. Napthine, S., Bell, S., Hill, C. H., Brierley, I. & Firth, A. E. Characterization of the stimulators  
1475 of protein-directed ribosomal frameshifting in Theiler's murine encephalomyelitis virus. *Nucleic  
1476 Acids Res.* **47**, 8207–8223 (2019).
- 1477 42. Hill, C. H. *et al.* Structural and molecular basis for Cardiovirus 2A protein as a viral gene  
1478 expression switch. *bioRxiv* 2020.08.11.245035 (2021). doi:10.1101/2020.08.11.245035
- 1479 43. Hill, C. H. *et al.* Investigating molecular mechanisms of 2A-stimulated ribosomal pausing and  
1480 frameshifting in Theilovirus. *Nucleic Acids Res.* **49**, 11938–11958 (2021).
- 1481 44. Yuan, S., Murtaugh, M. P. & Faaberg, K. S. Heteroclitite subgenomic RNAs are produced in  
1482 porcine reproductive and respiratory syndrome virus infection. *Virology* **275**, 158–169 (2000).
- 1483 45. Di, H. *et al.* Expanded subgenomic mRNA transcriptome and coding capacity of a nidovirus.  
1484 *Proc. Natl. Acad. Sci. U. S. A.* **114**, E8895–E8904 (2017).
- 1485 46. Kim, D. *et al.* The Architecture of SARS-CoV-2 Transcriptome. *Cell* **181**, 914–921.e10 (2020).
- 1486 47. Wang, D. *et al.* The SARS-CoV-2 subgenome landscape and its novel regulatory features. *Mol.  
1487 Cell* **81**, 2135–2147.e5 (2021).
- 1488 48. Stewart, H. *et al.* Transcriptional and Translational Landscape of Equine Torovirus. *J. Virol.* **92**,  
1489 589–607 (2018).
- 1490 49. Irigoyen, N. *et al.* High-Resolution Analysis of Coronavirus Gene Expression by RNA

- 1491 Sequencing and Ribosome Profiling. *PLoS Pathog.* **12**, e1005473 (2016).
- 1492 50. Dinan, A. M. *et al.* Comparative Analysis of Gene Expression in Virulent and Attenuated Strains  
1493 of Infectious Bronchitis Virus at Subcodon Resolution. *J. Virol.* **93**, (2019).
- 1494 51. Finkel, Y. *et al.* The coding capacity of SARS-CoV-2. *Nature* **589**, 125–130 (2021).
- 1495 52. Ingolia, N. T., Ghaemmaghami, S., Newman, J. R. S. & Weissman, J. S. Genome-Wide Analysis  
1496 in Vivo of Translation with Nucleotide Resolution Using Ribosome Profiling. *Science* **324**, 218–  
1497 223 (2009).
- 1498 53. Steitz, J. A. Polypeptide Chain Initiation: Nucleotide Sequences of the Three Ribosomal  
1499 Binding Sites in Bacteriophage R17 RNA. *Nature* **224**, 957–964 (1969).
- 1500 54. Wolin, S. L. & Walter, P. Ribosome pausing and stacking during translation of a eukaryotic  
1501 mRNA. *EMBO J.* **7**, 3559–3569 (1988).
- 1502 55. Wu, C. C.-C., Zinshteyn, B., Wehner, K. A. & Green, R. High-Resolution Ribosome Profiling  
1503 Defines Discrete Ribosome Elongation States and Translational Regulation during Cellular  
1504 Stress. *Mol. Cell* **73**, 959-970.e5 (2019).
- 1505 56. Lareau, L. F., Hite, D. H., Hogan, G. J. & Brown, P. O. Distinct stages of the translation  
1506 elongation cycle revealed by sequencing ribosome-protected mRNA fragments. *Elife* **2014**, 1–  
1507 16 (2014).
- 1508 57. Li, Y., Tas, A., Snijder, E. J. & Fang, Y. Identification of porcine reproductive and respiratory  
1509 syndrome virus ORF1a-encoded non-structural proteins in virus-infected cells. *J. Gen. Virol.*  
1510 **93**, 829–839 (2012).
- 1511 58. Kreutz, L. C. & Ackermann, M. R. Porcine reproductive and respiratory syndrome virus enters  
1512 cells through a low pH-dependent endocytic pathway. *Virus Res.* **42**, 137–147 (1996).
- 1513 59. Viehweger, A. *et al.* Direct RNA nanopore sequencing of full-length coronavirus genomes  
1514 provides novel insights into structural variants and enables modification analysis. *Genome Res.*

- 1515           **29**, 1545–1554 (2019).
- 1516   60.   Dobin, A. *et al.* STAR: ultrafast universal RNA-seq aligner. *Bioinformatics* **29**, 15–21 (2013).
- 1517   61.   Lin, Y. C., Chang, R. Y. & Chueh, L. L. Leader-body junction sequence of the viral subgenomic  
1518       mRNAs of porcine reproductive and respiratory syndrome virus isolated in Taiwan. *J. Vet. Med.*  
1519       *Sci.* **64**, 961–965 (2002).
- 1520   62.   Yuan, S., Murtaugh, M. P., Schumann, F. A., Mickelson, D. & Faaberg, K. S. Characterization  
1521       of heteroclitite subgenomic RNAs associated with PRRSV infection. *Virus Res.* **105**, 75–87  
1522       (2004).
- 1523   63.   Xiao, C. T. *et al.* Identification of new defective interfering RNA species associated with porcine  
1524       reproductive and respiratory syndrome virus infection. *Virus Res.* **158**, 33–36 (2011).
- 1525   64.   Erhard, F. *et al.* Improved Ribo-seq enables identification of cryptic translation events. *Nat.*  
1526       *Methods* **15**, 363–366 (2018).
- 1527   65.   Ingolia, N. T., Brar, G. A., Rouskin, S., McGeachy, A. M. & Weissman, J. S. The ribosome  
1528       profiling strategy for monitoring translation in vivo by deep sequencing of ribosome-protected  
1529       mRNA fragments. *Nat. Protoc.* **7**, 1534–1550 (2012).
- 1530   66.   Kearse, M. G. & Wilusz, J. E. Non-AUG translation: A new start for protein synthesis in  
1531       eukaryotes. *Genes Dev.* **31**, 1717–1731 (2017).
- 1532   67.   Firth, A. E. Mapping overlapping functional elements embedded within the protein-coding  
1533       regions of RNA viruses. *Nucleic Acids Res.* **42**, 12425–12439 (2014).
- 1534   68.   Tumescheit, C., Firth, A. E. & Brown, K. CIAAlign-A highly customisable command line tool to  
1535       clean, interpret and 1 visualise multiple sequence alignments. 2. *bioRxiv* 2020.09.14.291484  
1536       (2020). doi:10.1101/2020.09.14.291484
- 1537   69.   Ingolia, N. T., Lareau, L. F. & Weissman, J. S. Ribosome profiling of mouse embryonic stem  
1538       cells reveals the complexity and dynamics of mammalian proteomes. *Cell* **147**, 789–802 (2011).



- 1539 70. Artieri, C. G. & Fraser, H. B. Accounting for biases in riboprofiling data indicates a major role  
1540 for proline in stalling translation. *Genome Res.* **24**, 2011–2021 (2014).
- 1541 71. Pavlov, M. Y. *et al.* Slow peptide bond formation by proline and other N-alkylamino acids in  
1542 translation. *Proc. Natl. Acad. Sci. U. S. A.* **106**, 50–54 (2009).
- 1543 72. Brierley, I., Jenner, A. J. & Inglis, S. C. Mutational analysis of the “slippery-sequence”  
1544 component of a coronavirus ribosomal frameshifting signal. *J. Mol. Biol.* **227**, 463–479 (1992).
- 1545 73. Choi, J., O’Loughlin, S., Atkins, J. F. & Puglisi, J. D. The energy landscape of –1 ribosomal  
1546 frameshifting. *Sci. Adv.* **6**, (2020).
- 1547 74. Caliskan, N. *et al.* Conditional Switch between Frameshifting Regimes upon Translation of  
1548 dnaX mRNA. *Mol. Cell* **66**, 558-567.e4 (2017).
- 1549 75. Qin, P., Yu, D., Zuo, X. & Cornish, P. V. Structured mRNA induces the ribosome into a hyper-  
1550 rotated state. *EMBO Rep.* **15**, 185–190 (2014).
- 1551 76. Chen, J. *et al.* Dynamic pathways of -1 translational frameshifting. *Nature* **512**, 328–32 (2014).
- 1552 77. Dong, Q. *et al.* Gene expression in tonsils in swine following infection with porcine reproductive  
1553 and respiratory syndrome virus. *BMC Vet. Res.* **17**, 1–21 (2021).
- 1554 78. Lim, B. *et al.* Integrated time-serial transcriptome networks reveal common innate and tissue-  
1555 specific adaptive immune responses to PRRSV infection. *Vet. Res.* **51**, 1–18 (2020).
- 1556 79. Pröll, M. J. *et al.* Transcriptome profile of lung dendritic cells after in vitro porcine reproductive  
1557 and respiratory syndrome virus (PRRSV) infection. *PLoS One* **12**, (2017).
- 1558 80. Wilkinson, J. M. *et al.* Genome-wide analysis of the transcriptional response to porcine  
1559 reproductive and respiratory syndrome virus infection at the maternal/fetal interface and in the  
1560 fetus. *BMC Genomics* **17**, 1–17 (2016).
- 1561 81. Zeng, N. *et al.* Transcriptome Analysis Reveals Dynamic Gene Expression Profiles in Porcine  
1562 Alveolar Macrophages in Response to the Chinese Highly Pathogenic Porcine Reproductive and

- 1563 Respiratory Syndrome Virus. *Biomed Res. Int.* **2018**, (2018).
- 1564 82. Zhang, J. *et al.* Genome-wide analysis of long noncoding RNA profiling in PRRSV-infected  
1565 PAM cells by RNA sequencing. *Sci. Rep.* **7**, 4952 (2017).
- 1566 83. Zhang, K. *et al.* Global miRNA, lncRNA, and mRNA transcriptome profiling of endometrial  
1567 epithelial cells reveals genes related to porcine reproductive failure caused by porcine  
1568 reproductive and respiratory syndrome virus. *Front. Immunol.* **10**, 1221 (2019).
- 1569 84. Xiao, Z., Zou, Q., Liu, Y. & Yang, X. Genome-wide assessment of differential translations with  
1570 ribosome profiling data. *Nat. Commun.* **2016 71 7**, 1–11 (2016).
- 1571 85. Love, M. I., Huber, W. & Anders, S. Moderated estimation of fold change and dispersion for  
1572 RNA-seq data with DESeq2. *Genome Biol.* **15**, 550 (2014).
- 1573 86. Badaoui, B. *et al.* Pig immune response to general stimulus and to porcine reproductive and  
1574 respiratory syndrome virus infection: a meta-analysis approach. *BMC Genomics* **14**, 220 (2013).
- 1575 87. Crisci, E. *et al.* Distinctive Cellular and Metabolic Reprogramming in Porcine Lung  
1576 Mononuclear Phagocytes Infected With Type 1 PRRSV Strains. *Front. Immunol.* **11**, (2020).
- 1577 88. Kusnadi, E. P., Timpone, C., Topisirovic, I., Larsson, O. & Furic, L. Regulation of gene  
1578 expression via translational buffering. *Biochim. Biophys. Acta - Mol. Cell Res.* 119140 (2021).  
1579 doi:10.1016/j.bbamcr.2021.119140
- 1580 89. Kim, S. Y., Suh, H.-W., Chung, J. W., Yoon, S.-R. & Choi, I. *Diverse Functions of VDUP1 in*  
1581 *Cell Proliferation, Differentiation, and Diseases.* **4**, (2007).
- 1582 90. Alhawiti, N. M., Mahri, S. Al, Aziz, M. A., Malik, S. S. & Mohammad, S. TXNIP in Metabolic  
1583 Regulation: Physiological Role and Therapeutic Outlook. *Curr. Drug Targets* **18**, 1095 (2017).
- 1584 91. Xiang, G. *et al.* Catalytic degradation of vitamin D up-regulated protein 1 mRNA enhances  
1585 cardiomyocyte survival and prevents left ventricular remodeling after myocardial ischemia. *J.*  
1586 *Biol. Chem.* **280**, 39394–39402 (2005).

- 1587 92. Zhou, R., Tardivel, A., Thorens, B., Choi, I. & Tschopp, J. Thioredoxin-interacting protein links  
1588 oxidative stress to inflammasome activation. *Nat. Immunol.* **11**, 136–140 (2010).
- 1589 93. Shalev, A. Minireview: Thioredoxin-interacting protein: Regulation and function in the  
1590 pancreatic  $\beta$ -cell. *Molecular Endocrinology* **28**, 1211–1220 (2014).
- 1591 94. Nishiyama, A. *et al.* Identification of Thioredoxin-binding Protein-2/Vitamin D3 Up-regulated  
1592 Protein 1 as a Negative Regulator of Thioredoxin Function and Expression \*. *J. Biol. Chem.*  
1593 **274**, 21645–21650 (1999).
- 1594 95. Lu, J. & Holmgren, A. The thioredoxin antioxidant system. *Free Radic. Biol. Med.* **66**, 75–87  
1595 (2014).
- 1596 96. Matsuzawa, A. Thioredoxin and redox signaling: Roles of the thioredoxin system in control of  
1597 cell fate. *Arch. Biochem. Biophys.* **617**, 101–105 (2017).
- 1598 97. Song, H. *et al.* Vitamin D3 up-regulating protein 1 (VDUP1) antisense DNA regulates  
1599 tumorigenicity and melanogenesis of murine melanoma cells via regulating the expression of  
1600 fas ligand and reactive oxygen species. *Immunol. Lett.* **86**, 235–247 (2003).
- 1601 98. Lee, K. N. *et al.* VDUP1 is required for the development of natural killer cells. *Immunity* **22**,  
1602 195–208 (2005).
- 1603 99. Guo, R., Davis, D. & Fang, Y. Intercellular transfer of mitochondria rescues virus-induced cell  
1604 death but facilitates cell-to-cell spreading of porcine reproductive and respiratory syndrome  
1605 virus. *Virology* **517**, 122–134 (2018).
- 1606 100. Lee, S. M. & Kleiboeker, S. B. Porcine reproductive and respiratory syndrome virus induces  
1607 apoptosis through a mitochondria-mediated pathway. *Virology* **365**, 419–434 (2007).
- 1608 101. Redza-Dutordoir, M. & Averill-Bates, D. A. Activation of apoptosis signalling pathways by  
1609 reactive oxygen species. *Biochim. Biophys. Acta - Mol. Cell Res.* **1863**, 2977–2992 (2016).
- 1610 102. Herb, M. & Schramm, M. Functions of ros in macrophages and antimicrobial immunity.

- 1611            *Antioxidants* **10**, 1–39 (2021).
- 1612    103.    HJ, F. & M, T. Redox signaling in macrophages. *Mol. Aspects Med.* **22**, 189–216 (2001).
- 1613    104.    Morgan, S. B. *et al.* Pathology and Virus Distribution in the Lung and Lymphoid Tissues of Pigs  
1614            Experimentally Inoculated with Three Distinct Type 1 PRRS Virus Isolates of Varying  
1615            Pathogenicity. *Transbound. Emerg. Dis.* **63**, 285–295 (2016).
- 1616    105.    Rendra, E. *et al.* Reactive oxygen species (ROS) in macrophage activation and function in  
1617            diabetes. *Immunobiology* **224**, 242–253 (2019).
- 1618    106.    Tan, H. *et al.* The Reactive Oxygen Species in Macrophage Polarization : Human Diseases.  
1619            *Oxid. Med. Cell. Longev.* **2016**, 1–16 (2016).
- 1620    107.    Hadri, K. El *et al.* Thioredoxin-1 Promotes Anti-Inflammatory Macrophages of the M2  
1621            Phenotype and Antagonizes Atherosclerosis. *Arterioscler. Thromb. Vasc. Biol.* **32**, 1445–1452  
1622            (2012).
- 1623    108.    Wang, L. *et al.* Porcine alveolar macrophage polarization is involved in inhibition of porcine  
1624            reproductive and respiratory syndrome virus (PRRSV) replication. *J. Vet. Med. Sci.* **79**, 1906–  
1625            1915 (2017).
- 1626    109.    Finkel, Y. *et al.* SARS-CoV-2 uses a multipronged strategy to impede host protein synthesis.  
1627            *Nature* 1–9 (2021). doi:10.1038/s41586-021-03610-3
- 1628    110.    Alexander, M. R. *et al.* Ribosome-profiling reveals restricted post transcriptional expression of  
1629            antiviral cytokines and transcription factors during SARS-CoV-2 infection. *Int. J. Mol. Sci.* **22**,  
1630            (2021).
- 1631    111.    Gomez, G. N., Abrar, F., Dodhia, M. P., Gonzalez, F. G. & Nag, A. SARS coronavirus protein  
1632            nsp1 disrupts localization of nup93 from the nuclear pore complex. *Biochem. Cell Biol.* **97**, 758–  
1633            766 (2019).
- 1634    112.    Zhang, K. *et al.* Nsp1 protein of SARS-CoV-2 disrupts the mRNA export machinery to inhibit

- 1635 host gene expression. *Sci. Adv.* **7**, (2021).
- 1636 113. Han, M., Ke, H., Zhang, Q. & Yoo, D. Nuclear imprisonment of host cellular mRNA by nsp1 $\beta$   
1637 protein of porcine reproductive and respiratory syndrome virus. *Virology* **505**, 42–55 (2017).
- 1638 114. Ke, H., Han, M., Kim, J., Gustin, K. E. & Yoo, D. Porcine Reproductive and Respiratory  
1639 Syndrome Virus Nonstructural Protein 1 Beta Interacts with Nucleoporin 62 To Promote Viral  
1640 Replication and Immune Evasion. *J. Virol.* **93**, 469–488 (2019).
- 1641 115. Ke, H. *et al.* Type I interferon suppression-negative and host mRNA nuclear retention-negative  
1642 mutation in nsp1 $\beta$  confers attenuation of porcine reproductive and respiratory syndrome virus  
1643 in pigs. *Virology* **517**, 177–187 (2018).
- 1644 116. Zhang, H., Wang, Y. & Lu, J. Function and Evolution of Upstream ORFs in Eukaryotes. *Trends*  
1645 *Biochem. Sci.* **44**, 782–794 (2019).
- 1646 117. Kim, D. *et al.* A high-resolution temporal atlas of the SARS-CoV-2 translome and  
1647 transcriptome. *Nat. Commun.* **12**, 1–16 (2021).
- 1648 118. Kheyar, A., St-Laurent, G. & Archambault, D. Sequence determination of the extreme 5' end of  
1649 equine arteritis virus leader region. *Virus Genes* **12**, 291–295 (1996).
- 1650 119. Archambault, D., Kheyar, A., De Vries, A. A. F. & Rottier, P. J. M. The intraleader AUG  
1651 nucleotide sequence context is important for equine arteritis virus replication. *Virus Genes* **33**,  
1652 59–68 (2006).
- 1653 120. Molenkamp, R. *et al.* The arterivirus replicase is the only viral protein required for genome  
1654 replication and subgenomic mRNA transcription. *J. Gen. Virol.* **81**, 2491–2496 (2000).
- 1655 121. Snijder, E. J. & Meulenberg, J. J. M. The molecular biology of arteriviruses. *Journal of General*  
1656 *Virology* **79**, 961–979 (1998).
- 1657 122. Andreev, D. E. *et al.* Translation of 5' leaders is pervasive in genes resistant to eIF2 repression.  
1658 *Elife* **2015**, 1–21 (2015).

- 1659 123. Wissink, E. H. J. *et al.* Envelope Protein Requirements for the Assembly of Infectious Virions  
1660 of Porcine Reproductive and Respiratory Syndrome Virus. *J. Virol.* **79**, 12495–12506 (2005).
- 1661 124. Cao, Q. M., Subramaniam, S., Ni, Y.-Y., Cao, D. & Meng, X.-J. The non-structural protein  
1662 Nsp2TF of porcine reproductive and respiratory syndrome virus down-regulates the expression  
1663 of Swine Leukocyte Antigen class I. *Virology* **491**, 115–24 (2016).
- 1664 125. Huo, Y. *et al.* Involvement of unfolded protein response, p53 and Akt in modulation of porcine  
1665 reproductive and respiratory syndrome virus-mediated JNK activation. *Virology* **444**, 233–240  
1666 (2013).
- 1667 126. Lopinski, J. D., Dinman, J. D. & Bruenn, J. A. Kinetics of Ribosomal Pausing during  
1668 Programmed -1 Translational Frameshifting. *Mol. Cell. Biol.* **20**, 1095–1103 (2000).
- 1669 127. Smith, A. M., Costello, M. S., Kettring, A. H., Wingo, R. J. & Moore, S. D. Ribosome collisions  
1670 alter frameshifting at translational reprogramming motifs in bacterial mRNAs. *Proc. Natl. Acad.*  
1671 *Sci. U. S. A.* **116**, 21769–21779 (2019).
- 1672 128. Puray-Chavez, M. *et al.* The translational landscape of SARS-CoV-2 and infected cells. *bioRxiv*  
1673 (2021). doi:10.1101/2020.11.03.367516
- 1674 129. Chen, J. *et al.* Structural Basis for Helicase-Polymerase Coupling in the SARS-CoV-2  
1675 Replication-Transcription Complex. *Cell* **182**, 1560-1573.e13 (2020).
- 1676 130. Van Dinten, L. C., Den Boon, J. A., Wassenaar, A. L. M., Spaan, W. J. M. & Snijder, E. J. An  
1677 infectious arterivirus cDNA clone: Identification of a replicase point mutation that abolishes  
1678 discontinuous mRNA transcription. *Proc. Natl. Acad. Sci. U. S. A.* **94**, 991–996 (1997).
- 1679 131. Tang, C. *et al.* Helicase of type 2 porcine reproductive and respiratory syndrome virus strain HV  
1680 reveals a unique structure. *Viruses* **12**, (2020).
- 1681 132. Song, J. *et al.* Mapping the Nonstructural Protein Interaction Network of Porcine Reproductive  
1682 and Respiratory Syndrome Virus. *J. Virol.* **92**, 1112–1130 (2018).

- 1683 133. Nan, H. *et al.* The Network of Interactions Among Porcine Reproductive and Respiratory  
1684 Syndrome Virus Non-structural Proteins. *Front. Microbiol.* **9**, 970 (2018).
- 1685 134. Wang, T. Y. *et al.* The Nsp12-coding region of type 2 PRRSV is required for viral subgenomic  
1686 mRNA synthesis. *Emerg. Microbes Infect.* **8**, 1501–1510 (2019).
- 1687 135. Nedialkova, D. D. *et al.* Biochemical Characterization of Arterivirus Nonstructural Protein 11  
1688 Reveals the Nidovirus-Wide Conservation of a Replicative Endoribonuclease. *J. Virol.* **83**,  
1689 5671–5682 (2009).
- 1690 136. Wang, D. *et al.* The nonstructural protein 11 of porcine reproductive and respiratory syndrome  
1691 virus inhibits NF- $\kappa$ B signaling by means of its deubiquitinating activity. *Mol. Immunol.* **68**, 357–  
1692 366 (2015).
- 1693 137. Sun, Y. *et al.* Nonstructural protein 11 of porcine reproductive and respiratory syndrome virus  
1694 suppresses both MAVS and RIG-I expression as one of the mechanisms to antagonize Type I  
1695 interferon production. *PLoS One* **11**, e0168314 (2016).
- 1696 138. Su, Y. *et al.* The Superimposed Deubiquitination Effect of OTULIN and Porcine Reproductive  
1697 and Respiratory Syndrome Virus (PRRSV) Nsp11 Promotes Multiplication of PRRSV. *J. Virol.*  
1698 **92**, (2018).
- 1699 139. Wang, D. *et al.* Porcine Reproductive and Respiratory Syndrome Virus nsp11 Antagonizes Type  
1700 I Interferon Signaling by Targeting IRF9. *J. Virol.* **93**, (2019).
- 1701 140. Yang, L. *et al.* Nonstructural Protein 11 of Porcine Reproductive and Respiratory Syndrome  
1702 Virus Induces STAT2 Degradation To Inhibit Interferon Signaling. *J. Virol.* **93**, (2019).
- 1703 141. Shi, X. *et al.* Nonstructural protein 11 (nsp11) of porcine reproductive and respiratory syndrome  
1704 virus (PRRSV) promotes PRRSV infection in MARC-145 cells. *BMC Vet. Res.* **12**, 90 (2016).
- 1705 142. Chen, Z. *et al.* Sequences of 3' end of genome and of 5' end of open reading frame 1a of lactate  
1706 dehydrogenase-elevating virus and common junction motifs between 5' leader and bodies of



- 1707 seven subgenomic mRNAs. *J. Gen. Virol.* **74**, 643–659 (1993).
- 1708 143. Taiaroa, G. *et al.* Direct RNA sequencing and early evolution of SARS-CoV-2. **2**, (2020).
- 1709 144. Davidson, A. D. *et al.* Characterisation of the transcriptome and proteome of SARS-CoV-2  
1710 reveals a cell passage induced in-frame deletion of the furin-like cleavage site from the spike  
1711 glycoprotein. *Genome Med.* **12**, 68 (2020).
- 1712 145. St-Germain, J. R. *et al.* A SARS-CoV-2 BioID-based virus-host membrane protein interactome  
1713 and virus peptide compendium: new proteomics resources for COVID-19 research. *bioRxiv*  
1714 2020.08.28.269175 (2020). doi:10.1101/2020.08.28.269175
- 1715 146. Grenga, L. *et al.* Shotgun proteomics analysis of SARS-CoV-2-infected cells and how it can  
1716 optimize whole viral particle antigen production for vaccines. *Emerg. Microbes Infect.* **9**, 1712–  
1717 1721 (2020).
- 1718 147. Han, M., Du, Y., Song, C. & Yoo, D. Degradation of CREB-binding protein and modulation of  
1719 type I interferon induction by the zinc finger motif of the porcine reproductive and respiratory  
1720 syndrome virus nsp1 $\alpha$  subunit. *Virus Res.* **172**, 54–65 (2013).
- 1721 148. Han, M. *et al.* Biogenesis of non-structural protein 1 (nsp1) and nsp1-mediated type I interferon  
1722 modulation in arteriviruses. *Virology* **458–459**, 136–150 (2014).
- 1723 149. Kim, O., Sun, Y., Lai, F. W., Song, C. & Yoo, D. Modulation of type I interferon induction by  
1724 porcine reproductive and respiratory syndrome virus and degradation of CREB-binding protein  
1725 by non-structural protein 1 in MARC-145 and HeLa cells. *Virology* **402**, 315–326 (2010).
- 1726 150. Chen, Z. *et al.* Nuclear export signal of PRRSV NSP1 $\alpha$  is necessary for type I IFN inhibition.  
1727 *Virology* **499**, 278–287 (2016).
- 1728 151. Song, C., Krell, P. & Yoo, D. Nonstructural protein 1 $\alpha$  subunit-based inhibition of NF- $\kappa$ B  
1729 activation and suppression of interferon- $\beta$  production by porcine reproductive and respiratory  
1730 syndrome virus. *Virology* **407**, 268–280 (2010).

- 1731 152. Guo, H., Ingolia, N. T., Weissman, J. S. & Bartel, D. P. Mammalian microRNAs predominantly  
1732 act to decrease target mRNA levels. *Nature* **466**, 835–840 (2010).
- 1733 153. Chung, B. Y. *et al.* The use of duplex-specific nuclease in ribosome profiling and a user-friendly  
1734 software package for Ribo-seq data analysis. *RNA* **21**, 1731–45 (2015).
- 1735 154. Renaud, G., Stenzel, U. & Kelso, J. LeeHom: Adaptor trimming and merging for Illumina  
1736 sequencing reads. *Nucleic Acids Res.* **42**, e141 (2014).
- 1737 155. Langmead, B., Trapnell, C., Pop, M. & Salzberg, S. L. Ultrafast and memory-efficient alignment  
1738 of short DNA sequences to the human genome. *Genome Biol.* **10**, R25 (2009).
- 1739 156. Yoon, J., Chung, Y.-J. & Lee, M. STADIUM: Species-Specific tRNA Adaptive Index  
1740 Compendium. *Genomics Inform.* **16**, e28 (2018).
- 1741 157. Gerashchenko, M. V & Gladyshev, V. N. Translation inhibitors cause abnormalities in ribosome  
1742 profiling experiments. *Nucleic Acids Res.* **42**, e134 (2014).
- 1743 158. Li, W. & Godzik, A. Cd-hit: a fast program for clustering and comparing large sets of protein or  
1744 nucleotide sequences. *Bioinformatics* **22**, 1658–1659 (2006).
- 1745 159. Anders, S., Pyl, P. T. & Huber, W. HTSeq—a Python framework to work with high-throughput  
1746 sequencing data. *Bioinformatics* **31**, 166–169 (2015).
- 1747 160. Huang, D. W., Sherman, B. T. & Lempicki, R. A. Systematic and integrative analysis of large  
1748 gene lists using DAVID bioinformatics resources. *Nat. Protoc.* **2009 41** **4**, 44–57 (2008).
- 1749
