# Supplementary material for: Ribosome profiling of porcine reproductive and respiratory syndrome virus reveals novel features of viral gene expression
Source: bioRxiv preprint, doi:10.1101/2021.11.17.468997, version 1 (2021-11-19)
Supplement: Supplementary Table 9 [file 468997_file12.xlsx]

## Sheet: TS_up
Gene_ID	external_gene_name	wikigene_description	baseMean	log2FoldChange	lfcSE	stat	pvalue	padj	p_final	p_adj_final	noCHX_RNA_12hpi_WT_1	noCHX_RNA_12hpi_WT_2	noCHX_RNA_12hpi_mock_1	noCHX_RNA_12hpi_mock_2
ENSCSAG00000009591	DUSP1	dual specificity phosphatase 1	2691.25	4.64456	0.136562	33.1451	6.66103e-241	4.54415e-237	6.66103e-241	4.54415e-237	5527.8	4996.68	117.864	122.671
ENSCSAG00000011516	GADD45B	growth arrest and DNA damage inducible beta	2909.66	3.20316	0.137994	23.1386	1.89428e-118	6.4614e-115	1.89428e-118	6.4614e-115	6025.58	4806.92	409.248	396.878
ENSCSAG00000000149	JUN	Jun proto-oncogene, AP-1 transcription factor subunit	635.931	3.12854	0.157213	19.4857	1.45232e-84	2.47693e-81	1.45232e-84	2.47693e-81	1323.54	1065.69	84.3052	70.1916
ENSCSAG00000008869	HES1	hes family bHLH transcription factor 1	1158.34	2.63586	0.134507	19.4917	1.29217e-84	2.47693e-81	1.29217e-84	2.47693e-81	2083.99	2050.95	250.46	247.967
ENSCSAG00000005822	NR4A1	nuclear receptor subfamily 4 group A member 1	95.0609	2.58462	0.194778	10.8121	3.018e-27	1.58375e-24	3.018e-27	1.58375e-24	197.37	174.683	4.91098	3.27998
ENSCSAG00000011934	KLF10	Kruppel like factor 10	732.016	2.39827	0.153256	15.5588	1.38606e-54	1.57594e-51	1.38606e-54	1.57594e-51	1179.86	1415.06	144.874	188.271
ENSCSAG00000010905	BHLHE40	basic helix-loop-helix family member e40	2015.12	2.26512	0.134281	16.8449	1.14285e-63	1.5593e-60	1.14285e-63	1.5593e-60	3195.65	3736.2	540.208	588.429
ENSCSAG00000007490	NEDD9	neural precursor cell expressed, developmentally down-regulated 9	239.4	2.05978	0.176087	11.5562	6.86927e-31	3.90518e-28	6.86927e-31	3.90518e-28	388.934	454.929	44.1988	69.5356
ENSCSAG00000015405	ATF3		113.904	1.99087	0.188914	10.2488	1.19811e-24	5.83821e-22	1.19811e-24	5.83821e-22	217.687	193.534	25.3734	19.0239
ENSCSAG00000005364	GDF15	growth differentiation factor 15	598.078	1.9514	0.158642	12.2696	1.31861e-34	8.17778e-32	1.31861e-34	8.17778e-32	1134.88	888.495	209.535	159.407
ENSCSAG00000018838	JUNB	JunB proto-oncogene, AP-1 transcription factor subunit	672.511	1.83214	0.147384	12.4011	2.5762e-35	1.75748e-32	2.5762e-35	1.75748e-32	1214.69	996.572	234.09	244.687
ENSCSAG00000001429	CCN1	cellular communication network factor 1	1961.92	1.79752	0.138787	12.9461	2.47167e-38	2.10772e-35	2.47167e-38	2.10772e-35	2825.58	3540.16	770.206	711.756
ENSCSAG00000018011	SERPINE1	serpin family E member 1	2617.71	1.77141	0.125422	14.1177	2.95671e-45	2.88152e-42	2.95671e-45	2.88152e-42	4207.17	4169.77	1083.69	1010.23
ENSCSAG00000006272	NFKBIZ	NFKB inhibitor zeta	200.578	1.75682	0.175255	9.94241	2.72164e-23	1.2378e-20	2.72164e-23	1.2378e-20	294.603	382.04	64.6612	61.0077
ENSCSAG00000012217	FLNB	filamin B	995.564	1.6909	0.135314	12.4805	9.54213e-36	7.23293e-33	9.54213e-36	7.23293e-33	1639.91	1528.16	396.971	417.214
ENSCSAG00000012060	TIPARP	TCDD inducible poly(ADP-ribose) polymerase	500.731	1.56423	0.158486	9.8516	6.74585e-23	2.87626e-20	6.74585e-23	2.87626e-20	735.782	859.59	172.703	234.847
ENSCSAG00000014681	ARRDC3	arrestin domain containing 3	343.959	1.54683	0.16781	9.19406	3.78278e-20	1.29031e-17	3.78278e-20	1.29031e-17	483.265	623.329	113.771	155.471
ENSCSAG00000012077	CCNL1	cyclin L1	231.031	1.50361	0.174211	8.5996	7.99929e-18	2.37266e-15	7.99929e-18	2.37266e-15	309.116	436.079	85.1237	93.8075
ENSCSAG00000013954	KLF6	Kruppel like factor 6	120.118	1.48009	0.186995	7.86667	3.64206e-15	7.52913e-13	3.64206e-15	7.52913e-13	213.333	184.737	48.2913	34.1118
ENSCSAG00000006329	DNAJB1	DnaJ heat shock protein family (Hsp40) member B1	509.296	1.44162	0.14898	9.66173	4.38412e-22	1.75932e-19	4.38412e-22	1.75932e-19	805.442	764.08	214.446	253.215
ENSCSAG00000014785	CSRNP1	cysteine and serine rich nuclear protein 1	180.009	1.37422	0.174306	7.8561	3.96286e-15	7.95136e-13	3.96286e-15	7.95136e-13	306.213	260.139	80.2127	73.4716
ENSCSAG00000010109	MYC	MYC proto-oncogene, bHLH transcription factor	349.864	1.374	0.154882	8.85518	8.35507e-19	2.59083e-16	8.35507e-19	2.59083e-16	536.962	532.846	173.521	156.127
ENSCSAG00000000927	ID3	inhibitor of DNA binding 3, HLH protein	309.765	1.33114	0.160355	8.28793	1.15232e-16	2.71074e-14	1.15232e-16	2.71074e-14	496.327	448.646	159.607	134.479
ENSCSAG00000009672	IP6K3	inositol hexakisphosphate kinase 3	88.5259	1.30765	0.192161	6.77364	1.25584e-11	2.03985e-09	1.25584e-11	2.03985e-09	153.832	135.725	37.6509	26.8959
ENSCSAG00000010810	AMOTL2	angiomotin like 2	1789.01	1.27249	0.13377	9.51167	1.87633e-21	7.11129e-19	1.87633e-21	7.11129e-19	2792.2	2463.15	1009.21	891.499
ENSCSAG00000000848	EPHA2	EPH receptor A2	514.155	1.27215	0.151616	8.38491	5.07633e-17	1.28262e-14	5.07633e-17	1.28262e-14	851.882	682.394	265.193	257.151
ENSCSAG00000006885	LDLR		598.793	1.25513	0.146321	8.57341	1.00468e-17	2.85579e-15	1.00468e-17	2.85579e-15	915.737	854.564	338.858	286.014
ENSCSAG00000014076	ELF3	E74 like ETS transcription factor 3	614.394	1.24993	0.148816	8.39546	4.64086e-17	1.21769e-14	4.64086e-17	1.21769e-14	998.458	820.632	338.039	300.446
ENSCSAG00000007963	MYH9	myosin heavy chain 9	3451.07	1.22941	0.133333	9.22116	2.93908e-20	1.05528e-17	2.93908e-20	1.05528e-17	5410.25	4630.98	2016.78	1746.26
ENSCSAG00000016366	ITPKB	inositol-trisphosphate 3-kinase B	186.135	1.22874	0.172676	7.09744	1.27092e-12	2.16755e-10	1.27092e-12	2.16755e-10	265.578	300.354	83.4867	95.1195
ENSCSAG00000016152	PLK2	polo like kinase 2	1797.73	1.20599	0.132267	9.11663	7.74958e-20	2.51751e-17	7.74958e-20	2.51751e-17	2658.69	2542.33	919.99	1069.93
ENSCSAG00000008854	PLEC		2168.27	1.19203	0.140929	8.45918	2.69261e-17	7.3476e-15	2.69261e-17	7.3476e-15	3419.14	2874.1	1317.78	1062.06
ENSCSAG00000007979		serine/threonine-protein kinase SIK1	455.737	1.17798	0.149089	7.89624	2.87448e-15	6.12804e-13	2.87448e-15	6.12804e-13	661.769	666.057	263.556	231.567
ENSCSAG00000013532	PFKFB3		433.6	1.17385	0.151872	7.72473	1.12094e-14	2.12417e-12	1.12094e-14	2.12417e-12	657.415	608.248	252.916	215.823
ENSCSAG00000009162	FN1	fibronectin 1	512.357	1.16554	0.152706	7.62931	2.36015e-14	4.35161e-12	2.36015e-14	4.35161e-12	679.184	814.349	302.025	253.871
ENSCSAG00000009985	FLNC	filamin C	623.233	1.15895	0.145094	7.98469	1.4088e-15	3.10027e-13	1.4088e-15	3.10027e-13	975.238	826.916	350.317	340.462
ENSCSAG00000008600	CLK4	CDC like kinase 4	92.1783	1.15494	0.190505	6.04292	1.51352e-09	1.94815e-07	1.51352e-09	1.94815e-07	159.637	129.441	37.6509	41.9838
ENSCSAG00000010279	DYNC1H1		1009.64	1.11856	0.134776	8.29802	1.05858e-16	2.57916e-14	1.05858e-16	2.57916e-14	1464.31	1403.75	612.236	558.253
ENSCSAG00000000379	RHOB	ras homolog family member B	490.193	1.08205	0.166725	6.49288	8.42109e-11	1.30565e-08	8.42109e-11	1.30565e-08	814.15	610.762	316.758	219.103
ENSCSAG00000011873	RIMS2		121.187	1.07691	0.187021	5.74597	9.13943e-09	1.05677e-06	9.13943e-09	1.05677e-06	163.991	203.587	48.2913	68.8796
ENSCSAG00000007566	JARID2	jumonji and AT-rich interaction domain containing 2	249.965	1.07341	0.167192	6.41662	1.39331e-10	2.11226e-08	1.39331e-10	2.11226e-08	346.848	378.27	154.696	120.047
ENSCSAG00000006772	FLNA	filamin A	3885.67	1.0674	0.132316	8.06765	7.16623e-16	1.6296e-13	7.16623e-16	1.6296e-13	5974.79	4913.74	2398.2	2255.97
ENSCSAG00000006691	ANKRD1	ankyrin repeat domain 1	965.448	1.06414	0.136345	7.80374	6.00985e-15	1.17141e-12	6.00985e-15	1.17141e-12	1438.19	1273.05	571.311	579.245
ENSCSAG00000002155	FASN	fatty acid synthase	822.579	1.05455	0.156357	6.7462	1.51767e-11	2.4078e-09	1.51767e-11	2.4078e-09	1351.11	994.059	527.93	417.214
ENSCSAG00000017469	COL4A2		2220.36	1.02207	0.148553	6.88188	5.90682e-12	9.82838e-10	5.90682e-12	9.82838e-10	3413.33	2817.55	1528.13	1122.41
ENSCSAG00000012765	ID1	DNA-binding protein inhibitor ID-1	896.476	1.01587	0.14279	7.11427	1.12507e-12	1.96801e-10	1.12507e-12	1.96801e-10	1383.04	1117.22	551.667	533.981
ENSCSAG00000011550	TSC22D2	TSC22 domain family member 2	237.835	1.00771	0.165002	6.10221	1.0461e-09	1.39931e-07	1.0461e-09	1.39931e-07	316.372	360.676	132.596	141.695

## Sheet: TS_down
No genes had significantly lower transcription in WT than mock with log2FC threshold of 1

## Sheet: TS_full
gene_ID	external_gene_name	wikigene_description	baseMean	log2FoldChange	lfcSE	stat	pvalue	padj	p_final	p_adj_final	noCHX_RNA_12hpi_WT_1	noCHX_RNA_12hpi_WT_2	noCHX_RNA_12hpi_mock_1	noCHX_RNA_12hpi_mock_2
ENSCSAG00000009591	DUSP1	dual specificity phosphatase 1	2691.25	4.64456	0.136562	33.1451	6.66103e-241	4.54415e-237	6.66103e-241	4.54415e-237	5527.8	4996.68	117.864	122.671
ENSCSAG00000011516	GADD45B	growth arrest and DNA damage inducible beta	2909.66	3.20316	0.137994	23.1386	1.89428e-118	6.4614e-115	1.89428e-118	6.4614e-115	6025.58	4806.92	409.248	396.878
ENSCSAG00000000149	JUN	Jun proto-oncogene, AP-1 transcription factor subunit	635.931	3.12854	0.157213	19.4857	1.45232e-84	2.47693e-81	1.45232e-84	2.47693e-81	1323.54	1065.69	84.3052	70.1916
ENSCSAG00000008869	HES1	hes family bHLH transcription factor 1	1158.34	2.63586	0.134507	19.4917	1.29217e-84	2.47693e-81	1.29217e-84	2.47693e-81	2083.99	2050.95	250.46	247.967
ENSCSAG00000005822	NR4A1	nuclear receptor subfamily 4 group A member 1	95.0609	2.58462	0.194778	10.8121	3.018e-27	1.58375e-24	3.018e-27	1.58375e-24	197.37	174.683	4.91098	3.27998
ENSCSAG00000011934	KLF10	Kruppel like factor 10	732.016	2.39827	0.153256	15.5588	1.38606e-54	1.57594e-51	1.38606e-54	1.57594e-51	1179.86	1415.06	144.874	188.271
ENSCSAG00000010905	BHLHE40	basic helix-loop-helix family member e40	2015.12	2.26512	0.134281	16.8449	1.14285e-63	1.5593e-60	1.14285e-63	1.5593e-60	3195.65	3736.2	540.208	588.429
ENSCSAG00000007490	NEDD9	neural precursor cell expressed, developmentally down-regulated 9	239.4	2.05978	0.176087	11.5562	6.86927e-31	3.90518e-28	6.86927e-31	3.90518e-28	388.934	454.929	44.1988	69.5356
ENSCSAG00000015405	ATF3		113.904	1.99087	0.188914	10.2488	1.19811e-24	5.83821e-22	1.19811e-24	5.83821e-22	217.687	193.534	25.3734	19.0239
ENSCSAG00000005364	GDF15	growth differentiation factor 15	598.078	1.9514	0.158642	12.2696	1.31861e-34	8.17778e-32	1.31861e-34	8.17778e-32	1134.88	888.495	209.535	159.407
ENSCSAG00000012136	FOS	Fos proto-oncogene, AP-1 transcription factor subunit	49.8638	1.94752	0.19606	6.54329	6.01794e-11	NA	6.01794e-11	1	117.551	80.4295	0.818497	0.655997
ENSCSAG00000018838	JUNB	JunB proto-oncogene, AP-1 transcription factor subunit	672.511	1.83214	0.147384	12.4011	2.5762e-35	1.75748e-32	2.5762e-35	1.75748e-32	1214.69	996.572	234.09	244.687
ENSCSAG00000001429	CCN1	cellular communication network factor 1	1961.92	1.79752	0.138787	12.9461	2.47167e-38	2.10772e-35	2.47167e-38	2.10772e-35	2825.58	3540.16	770.206	711.756
ENSCSAG00000018011	SERPINE1	serpin family E member 1	2617.71	1.77141	0.125422	14.1177	2.95671e-45	2.88152e-42	2.95671e-45	2.88152e-42	4207.17	4169.77	1083.69	1010.23
ENSCSAG00000006272	NFKBIZ	NFKB inhibitor zeta	200.578	1.75682	0.175255	9.94241	2.72164e-23	1.2378e-20	2.72164e-23	1.2378e-20	294.603	382.04	64.6612	61.0077
ENSCSAG00000012217	FLNB	filamin B	995.564	1.6909	0.135314	12.4805	9.54213e-36	7.23293e-33	9.54213e-36	7.23293e-33	1639.91	1528.16	396.971	417.214
ENSCSAG00000012060	TIPARP	TCDD inducible poly(ADP-ribose) polymerase	500.731	1.56423	0.158486	9.8516	6.74585e-23	2.87626e-20	6.74585e-23	2.87626e-20	735.782	859.59	172.703	234.847
ENSCSAG00000014681	ARRDC3	arrestin domain containing 3	343.959	1.54683	0.16781	9.19406	3.78278e-20	1.29031e-17	3.78278e-20	1.29031e-17	483.265	623.329	113.771	155.471
ENSCSAG00000014360	CREB5	cAMP responsive element binding protein 5	65.0398	1.53355	0.19606	7.67434	1.66275e-14	NA	1.66275e-14	1	110.295	119.388	14.7329	15.7439
ENSCSAG00000012077	CCNL1	cyclin L1	231.031	1.50361	0.174211	8.5996	7.99929e-18	2.37266e-15	7.99929e-18	2.37266e-15	309.116	436.079	85.1237	93.8075
ENSCSAG00000013954	KLF6	Kruppel like factor 6	120.118	1.48009	0.186995	7.86667	3.64206e-15	7.52913e-13	3.64206e-15	7.52913e-13	213.333	184.737	48.2913	34.1118
ENSCSAG00000006329	DNAJB1	DnaJ heat shock protein family (Hsp40) member B1	509.296	1.44162	0.14898	9.66173	4.38412e-22	1.75932e-19	4.38412e-22	1.75932e-19	805.442	764.08	214.446	253.215
ENSCSAG00000014785	CSRNP1	cysteine and serine rich nuclear protein 1	180.009	1.37422	0.174306	7.8561	3.96286e-15	7.95136e-13	3.96286e-15	7.95136e-13	306.213	260.139	80.2127	73.4716
ENSCSAG00000010109	MYC	MYC proto-oncogene, bHLH transcription factor	349.864	1.374	0.154882	8.85518	8.35507e-19	2.59083e-16	8.35507e-19	2.59083e-16	536.962	532.846	173.521	156.127
ENSCSAG00000000927	ID3	inhibitor of DNA binding 3, HLH protein	309.765	1.33114	0.160355	8.28793	1.15232e-16	2.71074e-14	1.15232e-16	2.71074e-14	496.327	448.646	159.607	134.479
ENSCSAG00000009672	IP6K3	inositol hexakisphosphate kinase 3	88.5259	1.30765	0.192161	6.77364	1.25584e-11	2.03985e-09	1.25584e-11	2.03985e-09	153.832	135.725	37.6509	26.8959
ENSCSAG00000010810	AMOTL2	angiomotin like 2	1789.01	1.27249	0.13377	9.51167	1.87633e-21	7.11129e-19	1.87633e-21	7.11129e-19	2792.2	2463.15	1009.21	891.499
ENSCSAG00000000848	EPHA2	EPH receptor A2	514.155	1.27215	0.151616	8.38491	5.07633e-17	1.28262e-14	5.07633e-17	1.28262e-14	851.882	682.394	265.193	257.151
ENSCSAG00000006885	LDLR		598.793	1.25513	0.146321	8.57341	1.00468e-17	2.85579e-15	1.00468e-17	2.85579e-15	915.737	854.564	338.858	286.014
ENSCSAG00000014076	ELF3	E74 like ETS transcription factor 3	614.394	1.24993	0.148816	8.39546	4.64086e-17	1.21769e-14	4.64086e-17	1.21769e-14	998.458	820.632	338.039	300.446
ENSCSAG00000007963	MYH9	myosin heavy chain 9	3451.07	1.22941	0.133333	9.22116	2.93908e-20	1.05528e-17	2.93908e-20	1.05528e-17	5410.25	4630.98	2016.78	1746.26
ENSCSAG00000016366	ITPKB	inositol-trisphosphate 3-kinase B	186.135	1.22874	0.172676	7.09744	1.27092e-12	2.16755e-10	1.27092e-12	2.16755e-10	265.578	300.354	83.4867	95.1195
ENSCSAG00000016152	PLK2	polo like kinase 2	1797.73	1.20599	0.132267	9.11663	7.74958e-20	2.51751e-17	7.74958e-20	2.51751e-17	2658.69	2542.33	919.99	1069.93
ENSCSAG00000008854	PLEC		2168.27	1.19203	0.140929	8.45918	2.69261e-17	7.3476e-15	2.69261e-17	7.3476e-15	3419.14	2874.1	1317.78	1062.06
ENSCSAG00000007979		serine/threonine-protein kinase SIK1	455.737	1.17798	0.149089	7.89624	2.87448e-15	6.12804e-13	2.87448e-15	6.12804e-13	661.769	666.057	263.556	231.567
ENSCSAG00000013532	PFKFB3		433.6	1.17385	0.151872	7.72473	1.12094e-14	2.12417e-12	1.12094e-14	2.12417e-12	657.415	608.248	252.916	215.823
ENSCSAG00000009162	FN1	fibronectin 1	512.357	1.16554	0.152706	7.62931	2.36015e-14	4.35161e-12	2.36015e-14	4.35161e-12	679.184	814.349	302.025	253.871
ENSCSAG00000009985	FLNC	filamin C	623.233	1.15895	0.145094	7.98469	1.4088e-15	3.10027e-13	1.4088e-15	3.10027e-13	975.238	826.916	350.317	340.462
ENSCSAG00000008600	CLK4	CDC like kinase 4	92.1783	1.15494	0.190505	6.04292	1.51352e-09	1.94815e-07	1.51352e-09	1.94815e-07	159.637	129.441	37.6509	41.9838
ENSCSAG00000010279	DYNC1H1		1009.64	1.11856	0.134776	8.29802	1.05858e-16	2.57916e-14	1.05858e-16	2.57916e-14	1464.31	1403.75	612.236	558.253
ENSCSAG00000016665	CCN2	cellular communication network factor 2	45.0083	1.08606	0.196843	5.51617	3.4647e-08	NA	3.4647e-08	1	88.5261	62.8356	15.5514	13.1199
ENSCSAG00000000379	RHOB	ras homolog family member B	490.193	1.08205	0.166725	6.49288	8.42109e-11	1.30565e-08	8.42109e-11	1.30565e-08	814.15	610.762	316.758	219.103
ENSCSAG00000011873	RIMS2		121.187	1.07691	0.187021	5.74597	9.13943e-09	1.05677e-06	9.13943e-09	1.05677e-06	163.991	203.587	48.2913	68.8796
ENSCSAG00000007566	JARID2	jumonji and AT-rich interaction domain containing 2	249.965	1.07341	0.167192	6.41662	1.39331e-10	2.11226e-08	1.39331e-10	2.11226e-08	346.848	378.27	154.696	120.047
ENSCSAG00000006772	FLNA	filamin A	3885.67	1.0674	0.132316	8.06765	7.16623e-16	1.6296e-13	7.16623e-16	1.6296e-13	5974.79	4913.74	2398.2	2255.97
ENSCSAG00000006691	ANKRD1	ankyrin repeat domain 1	965.448	1.06414	0.136345	7.80374	6.00985e-15	1.17141e-12	6.00985e-15	1.17141e-12	1438.19	1273.05	571.311	579.245
ENSCSAG00000002155	FASN	fatty acid synthase	822.579	1.05455	0.156357	6.7462	1.51767e-11	2.4078e-09	1.51767e-11	2.4078e-09	1351.11	994.059	527.93	417.214
ENSCSAG00000004347			35.8683	1.04053	0.195404	5.31508	1.06612e-07	NA	1.06612e-07	1	59.5011	62.8356	10.6405	10.4959
ENSCSAG00000017469	COL4A2		2220.36	1.02207	0.148553	6.88188	5.90682e-12	9.82838e-10	5.90682e-12	9.82838e-10	3413.33	2817.55	1528.13	1122.41
ENSCSAG00000012765	ID1	DNA-binding protein inhibitor ID-1	896.476	1.01587	0.14279	7.11427	1.12507e-12	1.96801e-10	1.12507e-12	1.96801e-10	1383.04	1117.22	551.667	533.981
ENSCSAG00000011550	TSC22D2	TSC22 domain family member 2	237.835	1.00771	0.165002	6.10221	1.0461e-09	1.39931e-07	1.0461e-09	1.39931e-07	316.372	360.676	132.596	141.695
ENSCSAG00000015604	COL5A1	collagen type V alpha 1 chain	2340.72	0.993714	0.13554	7.33213	2.26525e-13	4.06673e-11	2.26525e-13	4.06673e-11	3260.95	3194.56	1612.44	1294.94
ENSCSAG00000013410	HEY1	hes related family bHLH transcription factor with YRPW motif 1	36.7136	0.989273	0.195126	5.08968	3.58677e-07	NA	3.58677e-07	1	59.5011	64.0923	14.7329	8.52796
ENSCSAG00000005346	PDCD11	programmed cell death 11	258.104	0.972451	0.164226	5.92008	3.21794e-09	3.90151e-07	3.21794e-09	3.90151e-07	390.386	336.799	162.881	142.351
ENSCSAG00000009681	CAD	carbamoyl-phosphate synthetase 2, aspartate transcarbamylase, and dihydroorotase	324.478	0.972052	0.156795	6.19685	5.7606e-10	8.02017e-08	5.7606e-10	8.02017e-08	422.313	483.834	195.621	196.143
ENSCSAG00000001494	PTBP2	polypyrimidine tract binding protein 2	368.937	0.971981	0.164193	5.91795	3.25984e-09	3.90151e-07	3.25984e-09	3.90151e-07	429.569	609.505	210.354	226.319
ENSCSAG00000009926	DUSP8	dual specificity phosphatase 8	112.205	0.9611	0.185443	5.17651	2.26077e-07	2.17225e-05	2.26077e-07	2.17225e-05	148.027	179.71	61.3873	59.6957
ENSCSAG00000019098	H2AC4	histone H2A type 1-B	465.015	0.946591	0.153693	6.15892	7.32438e-10	9.99338e-08	7.32438e-10	9.99338e-08	719.819	566.777	291.385	282.079
ENSCSAG00000012989	TNC	tenascin C	57.6615	0.940188	0.19631	4.78274	1.72919e-06	NA	1.72919e-06	1	87.0748	90.4832	26.1919	26.8959
ENSCSAG00000019089		histone H3.1	486.804	0.938745	0.146523	6.40593	1.49453e-10	2.21646e-08	1.49453e-10	2.21646e-08	699.501	635.896	302.844	308.974
ENSCSAG00000001485	F3		56.7066	0.93122	0.196576	4.73012	2.24391e-06	NA	2.24391e-06	1	87.0748	87.9698	22.9179	28.8638
ENSCSAG00000010845			402.852	0.88363	0.157549	5.60957	2.02825e-08	2.30612e-06	2.02825e-08	2.30612e-06	558.73	540.386	290.566	221.727
ENSCSAG00000012942	POLRMT		263.61	0.883579	0.174786	5.05853	4.22512e-07	3.74334e-05	4.22512e-07	3.74334e-05	438.277	297.841	179.251	139.071
ENSCSAG00000001158	EDN2		122.169	0.876444	0.182555	4.7999	1.58745e-06	0.000119007	1.58745e-06	0.000119007	178.503	167.143	76.1202	66.9116
ENSCSAG00000004953	LRP1	LDL receptor related protein 1	1169.65	0.86585	0.135508	6.39014	1.65734e-10	2.40561e-08	1.65734e-10	2.40561e-08	1616.69	1504.28	830.774	726.844
ENSCSAG00000009066	ADAMTS1	ADAM metallopeptidase with thrombospondin type 1 motif 1	234.831	0.865339	0.164399	5.26328	1.41511e-07	1.41969e-05	1.41511e-07	1.41969e-05	320.726	321.718	157.151	139.727
ENSCSAG00000010419	PIM1	Pim-1 proto-oncogene, serine/threonine kinase	248.774	0.862769	0.169569	5.08957	3.58872e-07	3.30841e-05	3.58872e-07	3.30841e-05	342.494	341.825	180.888	129.887
ENSCSAG00000001175	SLC2A1		112.07	0.862644	0.184479	4.67432	2.94933e-06	0.000199211	2.94933e-06	0.000199211	153.832	163.372	68.7537	62.3197
ENSCSAG00000017470	COL4A1	collagen type IV alpha 1 chain	3121.94	0.860791	0.148263	5.80712	6.3557e-09	7.47561e-07	6.3557e-09	7.47561e-07	4733.97	3663.31	2317.98	1772.5
ENSCSAG00000007028	PRICKLE1	prickle planar cell polarity protein 1	989.635	0.855327	0.140335	6.09491	1.09502e-09	1.43658e-07	1.09502e-09	1.43658e-07	1190.02	1451.5	659.708	657.309
ENSCSAG00000010924	CLK1		154.029	0.855218	0.182091	4.69385	2.68106e-06	0.000184749	2.68106e-06	0.000184749	181.406	251.342	81.0312	102.335
ENSCSAG00000004555	ADM	adrenomedullin	36.4045	0.853562	0.195171	4.39866	1.0892e-05	NA	1.0892e-05	1	58.0499	59.0654	18.0069	10.4959
ENSCSAG00000009036	HS3ST3A1	heparan sulfate-glucosamine 3-sulfotransferase 3A1	333.824	0.841405	0.154228	5.45554	4.88229e-08	5.3721e-06	4.88229e-08	5.3721e-06	452.789	444.876	225.087	212.543
ENSCSAG00000019097	H2BC3		626.396	0.835408	0.140983	5.92586	3.10666e-09	3.90151e-07	3.10666e-09	3.90151e-07	853.333	810.579	432.985	408.686
ENSCSAG00000016829	AHI1	Abelson helper integration site 1	106.97	0.83334	0.186291	4.47182	7.75567e-06	0.000472403	7.75567e-06	0.000472403	162.54	139.495	58.9318	66.9116
ENSCSAG00000013751	CLUH	clustered mitochondria homolog	478.767	0.831149	0.155084	5.3606	8.29442e-08	8.84133e-06	8.29442e-08	8.84133e-06	716.916	568.033	338.858	291.262
ENSCSAG00000011090	NR4A3	nuclear receptor subfamily 4 group A member 3	17.2867	0.827685	0.174074	4.7667	1.87269e-06	NA	1.87269e-06	1	24.6712	40.2148	1.63699	2.62399
ENSCSAG00000011446	RIN2	Ras and Rab interactor 2	182.764	0.827497	0.171202	4.83212	1.35089e-06	0.000104725	1.35089e-06	0.000104725	236.553	262.653	113.771	118.079
ENSCSAG00000003176			14.5673	0.827402	0.166017	4.10539	4.03634e-05	NA	4.03634e-05	1	34.8299	22.6208	0.818497	0
ENSCSAG00000006392	DDB1	damage specific DNA binding protein 1	764.454	0.811704	0.137106	5.92055	3.20874e-09	3.90151e-07	3.20874e-09	3.90151e-07	1034.74	977.721	523.838	521.517
ENSCSAG00000017164	POLG	DNA polymerase gamma, catalytic subunit	340.429	0.811393	0.161496	5.02575	5.0146e-07	4.2762e-05	5.0146e-07	4.2762e-05	512.29	402.148	240.638	206.639
ENSCSAG00000018191	BCL2	BCL2 apoptosis regulator	248.471	0.80249	0.165784	4.841	1.29186e-06	0.0001013	1.29186e-06	0.0001013	307.664	360.676	175.977	149.567
ENSCSAG00000008221	RIPK4	receptor interacting serine/threonine kinase 4	46.5902	0.801262	0.197163	4.07049	4.69147e-05	NA	4.69147e-05	1	75.4649	65.349	24.5549	20.9919
ENSCSAG00000017614	PIBF1		283.683	0.801042	0.166763	4.80234	1.56821e-06	0.00011887	1.56821e-06	0.00011887	341.043	423.512	162.881	207.295
ENSCSAG00000007060	ID2		336.651	0.800761	0.159064	5.03341	4.81821e-07	4.16074e-05	4.81821e-07	4.16074e-05	429.569	470.01	199.713	247.311
ENSCSAG00000004758	PLEKHA7		136.584	0.790801	0.183971	4.30136	1.6975e-05	0.000914447	1.6975e-05	0.000914447	223.492	154.575	87.5792	80.6876
ENSCSAG00000007131		ribosomal protein L23a	553.148	0.789369	0.165845	4.76016	1.93444e-06	0.000140391	1.93444e-06	0.000140391	573.243	909.859	347.043	382.446
ENSCSAG00000004553	LRIG3		319.268	0.782461	0.15615	5.01074	5.42202e-07	4.56655e-05	5.42202e-07	4.56655e-05	403.447	442.362	209.535	221.727
ENSCSAG00000007255	THBS1	thrombospondin 1	3380.94	0.782138	0.124226	6.29637	3.04689e-10	4.33039e-08	3.04689e-10	4.33039e-08	4313.11	4450.01	2475.13	2285.49
ENSCSAG00000008293	IER3	immediate early response 3	389.818	0.780755	0.156811	4.98039	6.34575e-07	5.27935e-05	6.34575e-07	5.27935e-05	560.181	472.523	286.474	240.095
ENSCSAG00000010542	TLN1	talin 1	771.019	0.780126	0.140737	5.54386	2.95871e-08	3.3089e-06	2.95871e-08	3.3089e-06	1014.42	1001.6	575.403	492.653
ENSCSAG00000005833	FNBP4	formin binding protein 4	140.674	0.776452	0.181678	4.27245	1.9334e-05	0.00101459	1.9334e-05	0.00101459	197.37	188.507	74.4832	102.335
ENSCSAG00000016138	PDE4D		160.243	0.774184	0.176028	4.39697	1.09775e-05	0.000618913	1.09775e-05	0.000618913	200.272	233.748	97.4011	109.551
ENSCSAG00000013764	PLEKHG3		182.826	0.761642	0.174053	4.378	1.19773e-05	0.0006643	1.19773e-05	0.0006643	252.517	238.775	135.052	104.959
ENSCSAG00000008888	SCRIB		510.077	0.754998	0.159216	4.74386	2.09685e-06	0.000150576	2.09685e-06	0.000150576	766.259	578.087	386.331	309.63
ENSCSAG00000014813	SAMD4A	sterile alpha motif domain containing 4A	544.761	0.752303	0.144423	5.20948	1.89367e-07	1.87227e-05	1.89367e-07	1.87227e-05	677.732	738.946	393.697	368.67
ENSCSAG00000007378	DNMT1	DNA methyltransferase 1	606.689	0.750863	0.146018	5.14328	2.69989e-07	2.55814e-05	2.69989e-07	2.55814e-05	840.272	738.946	452.629	394.91
ENSCSAG00000006769	SLC3A2		709.302	0.745658	0.147352	5.06143	4.16134e-07	3.73535e-05	4.16134e-07	3.73535e-05	1028.93	816.862	516.471	474.942
ENSCSAG00000012694	SKIL	SKI like proto-oncogene	902.637	0.74563	0.161058	4.62999	3.65686e-06	0.000240052	3.65686e-06	0.000240052	998.458	1378.61	516.471	717.004
ENSCSAG00000003049	ACLY		617.314	0.7446	0.14533	5.12425	2.98726e-07	2.79166e-05	2.98726e-07	2.79166e-05	873.651	730.149	430.529	434.926
ENSCSAG00000011564	TCOF1	treacle ribosome biogenesis factor 1	219.643	0.74457	0.169064	4.40511	1.05731e-05	0.000612474	1.05731e-05	0.000612474	325.079	258.883	142.418	152.191
ENSCSAG00000016117	RND3	Rho family GTPase 3	710.764	0.741303	0.138931	5.33597	9.50371e-08	9.82338e-06	9.50371e-08	9.82338e-06	893.968	942.533	487.006	519.549
ENSCSAG00000010268	BABAM2	BRISC and BRCA1 A complex member 2	207.577	0.738224	0.173888	4.24507	2.18529e-05	0.00112523	2.18529e-05	0.00112523	230.748	322.975	134.233	142.351
ENSCSAG00000009474	NUP210		282.641	0.734173	0.158599	4.62984	3.65954e-06	0.000240052	3.65954e-06	0.000240052	361.361	378.27	201.35	189.583
ENSCSAG00000012430	COL5A2	collagen type V alpha 2 chain	3499.19	0.733519	0.137071	5.35196	8.70058e-08	9.1316e-06	8.70058e-08	9.1316e-06	4851.52	4158.46	2745.24	2241.54
ENSCSAG00000005309	KLHL26		80.1746	0.726318	0.192098	3.78415	0.000154237	0.00545182	0.000154237	0.00545182	114.649	108.077	54.0208	43.9518
ENSCSAG00000000221	H2BC18	histone H2B type 2-F	519.5	0.725345	0.146027	4.96736	6.78715e-07	5.51214e-05	6.78715e-07	5.51214e-05	650.159	692.448	347.043	388.35
ENSCSAG00000002786	RARA	retinoic acid receptor alpha	232.697	0.723627	0.163603	4.42396	9.6907e-06	0.000574869	9.6907e-06	0.000574869	304.762	305.381	164.518	156.127
ENSCSAG00000010767	GEMIN5	gem nuclear organelle associated protein 5	205.58	0.722811	0.166959	4.32995	1.49146e-05	0.000813977	1.49146e-05	0.000813977	267.03	273.963	141.6	139.727
ENSCSAG00000015874	NOTCH1	notch receptor 1	775.379	0.71993	0.142115	5.06671	4.04756e-07	3.68166e-05	4.04756e-07	3.68166e-05	1073.92	921.169	580.314	526.109
ENSCSAG00000008724		regulator of calcineurin 1	632.078	0.719777	0.145906	4.93325	8.08733e-07	6.49079e-05	8.08733e-07	6.49079e-05	795.284	835.713	405.974	491.341
ENSCSAG00000007471			2771.68	0.717954	0.157598	4.55696	5.18991e-06	0.000324821	5.18991e-06	0.000324821	4255.06	2958.3	2228.77	1644.58
ENSCSAG00000002948	DDX10		154.209	0.71642	0.176811	4.05228	5.07205e-05	0.00214916	5.07205e-05	0.00214916	216.236	194.79	94.9456	110.863
ENSCSAG00000008502	CPSF1	cleavage and polyadenylation specific factor 1	679.952	0.71518	0.14959	4.78216	1.73423e-06	0.000127214	1.73423e-06	0.000127214	981.043	775.391	514.016	449.358
ENSCSAG00000004816	DDIT3	DNA damage inducible transcript 3	73.3749	0.713905	0.195428	3.66225	0.000250011	0.00764833	0.000250011	0.00764833	120.454	86.7131	51.5653	34.7678
ENSCSAG00000017369	SNRNP200	small nuclear ribonucleoprotein U5 subunit 200	1330.44	0.712957	0.13456	5.29904	1.16414e-07	1.18534e-05	1.16414e-07	1.18534e-05	1700.86	1699.07	1036.22	885.595
ENSCSAG00000004846			538.884	0.711759	0.146554	4.85769	1.18761e-06	9.4208e-05	1.18761e-06	9.4208e-05	719.819	667.314	410.885	357.518
ENSCSAG00000011392	PARD3	par-3 family cell polarity regulator	645.844	0.709498	0.140447	5.05212	4.36942e-07	3.82156e-05	4.36942e-07	3.82156e-05	793.832	860.847	464.906	463.79
ENSCSAG00000001403	DNAJB4	DnaJ heat shock protein family (Hsp40) member B4	177.369	0.709197	0.173157	4.09568	4.20934e-05	0.00190173	4.20934e-05	0.00190173	213.333	255.112	117.045	123.983
ENSCSAG00000012446	AARS2	alanyl-tRNA synthetase 2, mitochondrial	107.366	0.709025	0.187978	3.77612	0.000159289	0.00560139	0.000159289	0.00560139	163.991	128.185	76.9387	60.3517
ENSCSAG00000019076	H2BC17	histone cluster 1, H2bo	305.134	0.705378	0.160146	4.40468	1.05939e-05	0.000612474	1.05939e-05	0.000612474	397.642	395.864	191.528	235.503
ENSCSAG00000017794		pentatricopeptide repeat-containing protein 1, mitochondrial	183.141	0.702871	0.172161	4.08453	4.41654e-05	0.00198156	4.41654e-05	0.00198156	259.773	222.438	130.959	119.391
ENSCSAG00000017694	NPC1		147.894	0.700275	0.176624	3.96615	7.30437e-05	0.00291406	7.30437e-05	0.00291406	203.175	188.507	101.494	98.3995
ENSCSAG00000017943	HSPH1	heat shock protein family H (Hsp110) member 1	424.332	0.695422	0.148718	4.67656	2.91729e-06	0.000199017	2.91729e-06	0.000199017	529.705	559.236	295.477	312.91
ENSCSAG00000008454	ETS2		285.319	0.69364	0.157775	4.39723	1.09641e-05	0.000618913	1.09641e-05	0.000618913	371.519	365.703	201.35	202.703
ENSCSAG00000005406	ABTB2	ankyrin repeat and BTB domain containing 2	144.963	0.692333	0.179622	3.85726	0.000114665	0.00441885	0.000114665	0.00441885	207.528	177.196	107.223	87.9035
ENSCSAG00000009768	NID1	nidogen 1	523.778	0.690691	0.147087	4.69604	2.6526e-06	0.000184653	2.6526e-06	0.000184653	625.488	715.069	360.957	393.598
ENSCSAG00000002348	CBX4	chromobox 4	107.535	0.689832	0.185352	3.72387	0.000196195	0.00643483	0.000196195	0.00643483	146.576	142.008	75.3017	66.2557
ENSCSAG00000012490	GLUL	glutamate-ammonia ligase	1684.61	0.689535	0.126814	5.43769	5.39751e-08	5.84473e-06	5.39751e-08	5.84473e-06	2152.2	2107.5	1234.29	1244.43
ENSCSAG00000014277	SPTAN1	spectrin alpha, non-erythrocytic 1	672.393	0.688821	0.145425	4.73765	2.16208e-06	0.000153643	2.16208e-06	0.000153643	867.846	849.537	535.297	436.894
ENSCSAG00000004728	BAG3	BAG cochaperone 3	124.086	0.688035	0.181225	3.79786	0.000145951	0.00524041	0.000145951	0.00524041	163.991	165.886	85.1237	81.3436
ENSCSAG00000015515	PMEPA1	prostate transmembrane protein, androgen induced 1	1464.19	0.68743	0.132312	5.19592	2.03708e-07	1.98528e-05	2.03708e-07	1.98528e-05	1967.89	1743.06	1041.13	1104.7
ENSCSAG00000014215	SEMA7A		58.1414	0.685829	0.196633	3.49541	0.000473332	NA	0.000473332	1	95.7823	69.1191	36.8324	30.8318
ENSCSAG00000002988	PIEZO1	piezo type mechanosensitive ion channel component 1	602.954	0.683785	0.144563	4.73105	2.23366e-06	0.000157093	2.23366e-06	0.000157093	808.345	728.893	463.269	411.31
ENSCSAG00000010524	FBN1		115.984	0.682922	0.185668	3.68045	0.000232825	0.00718704	0.000232825	0.00718704	140.771	169.656	85.9422	67.5676
ENSCSAG00000013165	MYBBP1A	MYB binding protein 1a	186.944	0.682552	0.180486	3.78591	0.000153148	0.00544154	0.000153148	0.00544154	293.152	202.331	144.055	108.239
ENSCSAG00000011685	SVIL		266.544	0.680045	0.163085	4.17049	3.03942e-05	0.00144999	3.03942e-05	0.00144999	310.567	378.27	192.347	184.991
ENSCSAG00000010062	MARK3	microtubule affinity regulating kinase 3	256.694	0.679891	0.162773	4.17722	2.95097e-05	0.00142777	2.95097e-05	0.00142777	309.116	354.393	174.34	188.927
ENSCSAG00000012908	HBEGF	heparin binding EGF like growth factor	81.9211	0.679473	0.192362	3.53681	0.000404986	0.0115599	0.000404986	0.0115599	114.649	109.334	59.7503	43.9518
ENSCSAG00000007697	CDKAL1	CDK5 regulatory subunit associated protein 1 like 1	136.041	0.679224	0.179029	3.79573	0.000147212	0.00525799	0.000147212	0.00525799	185.76	173.426	95.7641	89.2155
ENSCSAG00000015009	EEPD1	endonuclease/exonuclease/phosphatase family domain-containing protein 1	45.3203	0.676389	0.197161	3.43662	0.000589011	NA	0.000589011	1	65.3061	65.349	27.0104	23.6159
ENSCSAG00000013369	TIAM2		178.16	0.670436	0.173995	3.85359	0.000116401	0.00441885	0.000116401	0.00441885	240.907	224.951	109.679	137.103
ENSCSAG00000015968	DHX30	DExH-box helicase 30	292.196	0.669936	0.16002	4.18825	2.81115e-05	0.00136983	2.81115e-05	0.00136983	387.483	363.19	225.905	192.207
ENSCSAG00000004200	NUMA1	nuclear mitotic apparatus protein 1	687.196	0.668583	0.149122	4.4847	7.3017e-06	0.000452838	7.3017e-06	0.000452838	957.823	791.728	545.937	453.294
ENSCSAG00000006594	PRKAG2		159.957	0.665895	0.177381	3.75423	0.000173872	0.00590126	0.000173872	0.00590126	182.857	236.262	107.223	113.487
ENSCSAG00000004496	BMP2K		153.281	0.663768	0.176405	3.76364	0.000167458	0.00579896	0.000167458	0.00579896	208.98	192.277	99.0381	112.831
ENSCSAG00000005877	RRP12	ribosomal RNA processing 12 homolog	132.706	0.663462	0.188749	3.52098	0.00042996	0.0120707	0.00042996	0.0120707	222.041	134.468	98.2196	76.0956
ENSCSAG00000000205		histone H3	1190.41	0.661485	0.143279	4.61752	3.8836e-06	0.000249943	3.8836e-06	0.000249943	1702.31	1310.75	887.251	861.323
ENSCSAG00000013879	SPTBN1	spectrin beta, non-erythrocytic 1	1074.08	0.661282	0.132997	4.97272	6.6019e-07	5.42628e-05	6.6019e-07	5.42628e-05	1346.76	1354.73	829.956	764.892
ENSCSAG00000014264	MICAL3		441.762	0.659898	0.147317	4.48023	7.45629e-06	0.00045826	7.45629e-06	0.00045826	547.12	573.06	327.399	319.47
ENSCSAG00000008784	VARS1	valyl-tRNA synthetase 1	416.668	0.659338	0.152321	4.32998	1.49125e-05	0.000813977	1.49125e-05	0.000813977	570.34	490.117	317.577	288.638
ENSCSAG00000017309	ADAMTSL3		473.24	0.65406	0.148104	4.4174	9.98937e-06	0.000587478	9.98937e-06	0.000587478	615.329	583.114	369.142	325.374
ENSCSAG00000002273	GCN1	GCN1 activator of EIF2AK4	692.719	0.65385	0.146989	4.44944	8.60952e-06	0.000519771	8.60952e-06	0.000519771	925.896	826.916	561.489	456.574
ENSCSAG00000015684	COL7A1	collagen type VII alpha 1 chain	219.049	0.653178	0.175873	3.71736	0.000201318	0.00647826	0.000201318	0.00647826	326.531	243.802	175.977	129.887
ENSCSAG00000002143	MEF2D	myocyte enhancer factor 2D	105.1	0.651744	0.186453	3.49842	0.000468025	0.0129791	0.000468025	0.0129791	140.771	138.238	77.7572	63.6317
ENSCSAG00000007565	CCDC91	coiled-coil domain containing 91	145.566	0.648906	0.183927	3.52738	0.0004197	0.0118805	0.0004197	0.0118805	166.893	217.411	81.8497	116.111
ENSCSAG00000019083		histone H2B type 1-F/J/L	379.982	0.646329	0.158692	4.073	4.6411e-05	0.00204268	4.6411e-05	0.00204268	477.46	491.374	238.183	312.91
ENSCSAG00000000206		histone H2A type 2-A	837.423	0.645005	0.150017	4.30073	1.70236e-05	0.000914447	1.70236e-05	0.000914447	1185.67	932.48	675.26	556.285
ENSCSAG00000010557	CHAF1A		250.338	0.644998	0.166733	3.87052	0.000108603	0.00420959	0.000108603	0.00420959	361.361	281.503	186.617	171.871
ENSCSAG00000008703	RUNX1	RUNX family transcription factor 1	484.721	0.644547	0.15075	4.27599	1.90286e-05	0.00100631	1.90286e-05	0.00100631	550.023	676.111	351.954	360.798
ENSCSAG00000014618	NUAK2	NUAK family kinase 2	385.767	0.644149	0.153355	4.20146	2.652e-05	0.00132058	2.652e-05	0.00132058	465.85	511.481	302.025	263.711
ENSCSAG00000004371	SF3B3	splicing factor 3b subunit 3	868.321	0.643222	0.134458	4.78436	1.71531e-06	0.000127194	1.71531e-06	0.000127194	1078.28	1095.85	652.342	646.813
ENSCSAG00000005047	UBE2O	ubiquitin conjugating enzyme E2 O	166.712	0.642594	0.172848	3.71899	0.000200022	0.00647826	0.000200022	0.00647826	213.333	217.411	118.682	117.423
ENSCSAG00000001977	DHX37	DEAH-box helicase 37	110.601	0.641273	0.193695	3.318	0.000906631	0.0204802	0.000906631	0.0204802	201.723	99.2802	71.2092	70.1916
ENSCSAG00000011617	PTK7	protein tyrosine kinase 7 (inactive)	703.649	0.640616	0.14559	4.4012	1.07655e-05	0.000617164	1.07655e-05	0.000617164	966.531	805.552	552.485	490.029
ENSCSAG00000017573			55.3954	0.63982	0.196727	3.258	0.00112199	NA	0.00112199	1	72.5624	81.6862	38.4694	28.8638
ENSCSAG00000005937	TNKS1BP1		274.975	0.637619	0.173622	3.67562	0.00023727	0.00729124	0.00023727	0.00729124	412.154	297.841	225.905	163.999
ENSCSAG00000019096	H1-2	H1.2 linker histone, cluster member	2130.42	0.637542	0.156182	4.08309	4.44413e-05	0.00198156	4.44413e-05	0.00198156	3220.32	2181.65	1733.58	1386.12
ENSCSAG00000005489	RAG1		19.5797	0.637061	0.179985	3.60386	0.000313523	NA	0.000313523	1	24.6712	40.2148	8.18497	5.24797
ENSCSAG00000004544	RFWD3	ring finger and WD repeat domain 3	423.49	0.63473	0.149819	4.23714	2.26384e-05	0.00115253	2.26384e-05	0.00115253	522.449	545.413	295.477	330.622
ENSCSAG00000005252	YTHDC1	YTH domain containing 1	339.179	0.634002	0.153384	4.13427	3.56082e-05	0.00165251	3.56082e-05	0.00165251	422.313	434.822	246.368	253.215
ENSCSAG00000013329	KLHL3	kelch like family member 3	26.1473	0.633563	0.188979	3.38636	0.000708275	NA	0.000708275	1	34.8299	46.4983	14.7329	8.52796
ENSCSAG00000019099		histone H3.1	1777.35	0.632776	0.137765	4.59378	4.35292e-06	0.000277529	4.35292e-06	0.000277529	2413.42	2030.85	1433.19	1231.96
ENSCSAG00000004096	AXIN2	axin 2	78.7378	0.63083	0.19221	3.28338	0.00102569	0.0224272	0.00102569	0.0224272	95.7823	115.617	52.3838	51.1677
ENSCSAG00000010278	FOSL2	FOS like 2, AP-1 transcription factor subunit	404.53	0.626949	0.16876	3.71755	0.000201167	0.00647826	0.000201167	0.00647826	602.268	432.309	338.858	244.687
ENSCSAG00000011641	RRBP1	ribosome binding protein 1	246.903	0.626217	0.164683	3.80454	0.000142066	0.0051279	0.000142066	0.0051279	339.592	289.044	189.073	169.903
ENSCSAG00000008732	TRIM24	tripartite motif containing 24	749.077	0.625637	0.142754	4.38288	1.1712e-05	0.000654912	1.1712e-05	0.000654912	888.163	986.518	518.108	603.517
ENSCSAG00000015376	SV2C	synaptic vesicle glycoprotein 2C	16.9574	0.622928	0.175676	3.62111	0.000293341	NA	0.000293341	1	24.6712	32.6745	6.54797	3.93598
ENSCSAG00000009481	SH2D4B	SH2 domain containing 4B	14.5194	0.621724	0.17018	3.73097	0.000190742	NA	0.000190742	1	23.22	27.6476	3.27399	3.93598
ENSCSAG00000000006	ND1	NADH dehydrogenase subunit 1	38.6756	0.621664	0.192629	3.24582	0.00117111	NA	0.00117111	1	34.8299	81.6862	13.9144	24.2719
ENSCSAG00000018511	NFIL3	nuclear factor, interleukin 3 regulated	53.3622	0.62151	0.197045	3.15662	0.00159608	NA	0.00159608	1	59.5011	89.2265	31.9214	32.7998
ENSCSAG00000001154	CTPS1	CTP synthase 1	380.261	0.621279	0.152443	4.07687	4.56463e-05	0.00202207	4.56463e-05	0.00202207	496.327	459.956	297.114	267.647
ENSCSAG00000014122	OSBPL3	oxysterol binding protein like 3	451.704	0.620787	0.148105	4.19206	2.76428e-05	0.00136046	2.76428e-05	0.00136046	545.669	586.884	323.306	350.958
ENSCSAG00000006427	GTF3C1	general transcription factor IIIC subunit 1	473.498	0.618364	0.145729	4.2442	2.19372e-05	0.00112523	2.19372e-05	0.00112523	593.56	590.654	363.413	346.366
ENSCSAG00000009649	ITPR3	inositol 1,4,5-trisphosphate receptor type 3	542.869	0.618086	0.143815	4.2986	1.71883e-05	0.00091608	1.71883e-05	0.00091608	706.757	649.72	401.063	413.934
ENSCSAG00000006597		transportin 2	706.125	0.616394	0.139223	4.42811	9.50621e-06	0.000568872	9.50621e-06	0.000568872	860.59	897.292	554.941	511.677
ENSCSAG00000018839	IER2	immediate early response 2	34.2379	0.612975	0.195063	3.1536	0.00161271	NA	0.00161271	1	43.5374	56.552	20.4624	16.3999
ENSCSAG00000005250	ELP4	elongator acetyltransferase complex subunit 4	119.087	0.61291	0.183836	3.33467	0.000854015	0.0196165	0.000854015	0.0196165	137.868	172.169	81.0312	85.2796
ENSCSAG00000003794			669.148	0.612501	0.147921	4.14099	3.45817e-05	0.00162701	3.45817e-05	0.00162701	741.587	931.223	479.639	524.141
ENSCSAG00000010968	PHRF1	PHD and ring finger domains 1	358.775	0.611909	0.160602	3.81205	0.000137819	0.00505485	0.000137819	0.00505485	491.973	413.458	295.477	234.191
ENSCSAG00000016802	CCNB1IP1	cyclin B1 interacting protein 1	24.0553	0.611337	0.184912	3.33935	0.000839736	NA	0.000839736	1	26.1225	50.2684	7.36647	12.4639
ENSCSAG00000015807	HK2	hexokinase 2	434.247	0.607513	0.147628	4.11598	3.8553e-05	0.00176516	3.8553e-05	0.00176516	528.254	555.466	326.58	326.686
ENSCSAG00000016929	MEF2A	myocyte enhancer factor 2A	190.089	0.606828	0.177038	3.42787	0.000608327	0.0157126	0.000608327	0.0157126	198.821	289.044	130.141	142.351
ENSCSAG00000008670	DOP1B	DOP1 leucine zipper like protein B	148.209	0.606823	0.176406	3.44123	0.000579078	0.0152904	0.000579078	0.0152904	182.857	197.304	106.405	106.271
ENSCSAG00000014699	CDCA7		70.4849	0.606337	0.195736	3.09766	0.00195057	NA	0.00195057	1	91.4286	100.537	33.5584	56.4157
ENSCSAG00000012911	RIPK2	receptor interacting serine/threonine kinase 2	102.884	0.605989	0.189369	3.19963	0.00137605	0.0274487	0.00137605	0.0274487	120.454	150.805	58.9318	81.3436
ENSCSAG00000017683	RMC1		110.473	0.605661	0.18442	3.28569	0.00101732	0.0223157	0.00101732	0.0223157	136.417	150.805	78.5757	76.0956
ENSCSAG00000002403	ZNF202	zinc finger protein 202	53.1064	0.605495	0.19675	3.0815	0.00205962	NA	0.00205962	1	78.3674	67.8624	32.7399	33.4558
ENSCSAG00000018296			253.809	0.605473	0.161237	3.7566	0.000172238	0.00589552	0.000172238	0.00589552	317.823	321.718	193.984	181.711
ENSCSAG00000014259	ZBTB2	zinc finger and BTB domain containing 2	48.3874	0.604988	0.197159	3.07169	0.00212851	NA	0.00212851	1	53.6962	81.6862	28.6474	29.5198
ENSCSAG00000011901	TCF12	transcription factor 12	406.527	0.60348	0.166644	3.6214	0.000293013	0.00884485	0.000293013	0.00884485	422.313	606.992	263.556	333.246
ENSCSAG00000016994	WDR70	WD repeat domain 70	125.486	0.60282	0.183243	3.29159	0.000996233	0.0219235	0.000996233	0.0219235	145.125	179.71	95.7641	81.3436
ENSCSAG00000000033	ND6	NADH dehydrogenase subunit 6	130.69	0.602445	0.181043	3.32862	0.00087278	0.0199651	0.00087278	0.0199651	152.381	184.737	92.4901	93.1515
ENSCSAG00000012403	IGF2R	insulin like growth factor 2 receptor	243.249	0.602068	0.162583	3.70458	0.000211742	0.0067817	0.000211742	0.0067817	319.274	294.07	179.251	180.399
ENSCSAG00000007784	ACSL3	acyl-CoA synthetase long chain family member 3	723.382	0.601777	0.151147	3.98154	6.84689e-05	0.00274762	6.84689e-05	0.00274762	843.175	963.898	469.817	616.637
ENSCSAG00000019095	H1-6	H1.6 linker histone, cluster member	25.3704	0.599134	0.188672	3.20422	0.00135431	NA	0.00135431	1	47.8912	30.1611	12.2775	11.1519
ENSCSAG00000002654	CWC25	CWC25 spliceosome associated protein homolog	3058.5	0.598853	0.147654	4.05639	4.98369e-05	0.00213829	4.98369e-05	0.00213829	4054.78	3557.75	2699.4	1922.07
ENSCSAG00000017151	KIF7	kinesin family member 7	120.972	0.598694	0.181873	3.29374	0.000988641	0.0219002	0.000988641	0.0219002	153.832	158.346	88.3977	83.3116
ENSCSAG00000016696			2456.75	0.597927	0.123854	4.82794	1.37949e-06	0.00010574	1.37949e-06	0.00010574	2999.73	3038.73	1890.73	1897.8
ENSCSAG00000009057	ELAC2	elaC ribonuclease Z 2	117.532	0.597362	0.18355	3.25743	0.00112427	0.0240432	0.00112427	0.0240432	159.637	144.522	89.2162	76.7516
ENSCSAG00000012709	ZFP36L2	ZFP36 ring finger protein like 2	987.661	0.597181	0.163882	3.6445	0.000267907	0.00812295	0.000267907	0.00812295	936.055	1552.04	712.092	750.46
ENSCSAG00000010812	LMCD1		80.3336	0.596834	0.191366	3.12038	0.00180619	0.0333287	0.00180619	0.0333287	103.039	109.334	53.2023	55.7597
ENSCSAG00000006607	PPP1R3C	protein phosphatase 1 regulatory subunit 3C	42.5941	0.594967	0.196946	3.02593	0.00247874	NA	0.00247874	1	50.7937	69.1191	26.1919	24.2719
ENSCSAG00000013731			710.767	0.594116	0.142364	4.17418	2.99064e-05	0.00143677	2.99064e-05	0.00143677	928.798	831.943	574.585	507.741
ENSCSAG00000018910	ZBTB38	zinc finger and BTB domain containing 38	316.875	0.5893	0.159921	3.68527	0.000228462	0.00708439	0.000228462	0.00708439	371.519	422.255	215.265	258.463
ENSCSAG00000019086	H2BC12	histone H2B type 1-K	589.062	0.589269	0.143117	4.11833	3.8163e-05	0.00175911	3.8163e-05	0.00175911	770.612	687.421	453.447	444.766
ENSCSAG00000009158	NFIB	nuclear factor 1 B-type	81.6062	0.588035	0.191732	3.06812	0.00215408	0.0375835	0.00215408	0.0375835	95.7823	119.388	54.8393	56.4157
ENSCSAG00000010214	TENM2		38.1607	0.58749	0.196345	3.00025	0.00269759	NA	0.00269759	1	49.3424	59.0654	24.5549	19.6799
ENSCSAG00000017571	PTPRM	protein tyrosine phosphatase receptor type M	291.105	0.587341	0.1591	3.69237	0.000222172	0.00695256	0.000222172	0.00695256	339.592	388.324	212.809	223.695
ENSCSAG00000003964	EDC4	enhancer of mRNA decapping 4	202.137	0.587133	0.170619	3.44362	0.000573977	0.0152361	0.000573977	0.0152361	268.481	242.545	163.699	133.823
ENSCSAG00000017996	SRRT		166.001	0.584551	0.175416	3.33504	0.000852874	0.0196165	0.000852874	0.0196165	222.041	199.817	132.596	109.551
ENSCSAG00000005934	KIF1A		257.814	0.584112	0.166092	3.51867	0.000433723	0.0121265	0.000433723	0.0121265	367.166	281.503	192.347	190.239
ENSCSAG00000002962	NUAK1	NUAK family kinase 1	858.474	0.583972	0.138453	4.21848	2.45953e-05	0.00123374	2.45953e-05	0.00123374	1020.23	1094.6	699.815	619.261
ENSCSAG00000011558	IFT140	intraflagellar transport 140	141.716	0.583108	0.179849	3.24445	0.00117677	0.0247775	0.00117677	0.0247775	169.796	192.277	112.953	91.8395
ENSCSAG00000013315	GNL3	G protein nucleolar 3	673.16	0.58179	0.14593	3.98785	6.66748e-05	0.00269145	6.66748e-05	0.00269145	896.871	767.851	551.667	476.254
ENSCSAG00000016447	NCKAP5	NCK associated protein 5	144.676	0.580634	0.187431	3.09818	0.00194714	0.0353282	0.00194714	0.0353282	136.417	238.775	96.5826	106.927
ENSCSAG00000016742	PRPF6		400.388	0.580521	0.164586	3.52924	0.000416755	0.0118463	0.000416755	0.0118463	570.34	433.565	340.495	257.151
ENSCSAG00000012752	TPX2	TPX2 microtubule nucleation factor	570.428	0.58	0.143073	4.05474	5.01903e-05	0.00213999	5.01903e-05	0.00213999	690.794	716.325	456.721	417.87
ENSCSAG00000002367	USP36	ubiquitin specific peptidase 36	197.169	0.579189	0.170274	3.40375	0.000664682	0.0165195	0.000664682	0.0165195	268.481	228.721	153.059	138.415
ENSCSAG00000010951	ITPR1	inositol 1,4,5-trisphosphate receptor type 1	97.9036	0.578772	0.187926	3.08093	0.00206357	0.0363811	0.00206357	0.0363811	114.649	139.495	67.9352	69.5356
ENSCSAG00000012486	DNAJC1	DnaJ heat shock protein family (Hsp40) member C1	135.808	0.578656	0.178636	3.24121	0.00119024	0.0249842	0.00119024	0.0249842	172.698	173.426	100.675	96.4315
ENSCSAG00000008193	MCM5	minichromosome maintenance complex component 5	421.722	0.578577	0.151974	3.80849	0.000139816	0.00510067	0.000139816	0.00510067	555.828	490.117	340.495	300.446
ENSCSAG00000013497	CAMKK1	calcium/calmodulin dependent protein kinase kinase 1	178.817	0.578339	0.172023	3.36419	0.000767685	0.0182479	0.000767685	0.0182479	238.005	213.641	138.326	125.295
ENSCSAG00000010133	TRIB1	tribbles pseudokinase 1	141.169	0.576171	0.178379	3.23102	0.0012335	0.0254998	0.0012335	0.0254998	168.345	191.02	99.0381	106.271
ENSCSAG00000011403	NRP1	neuropilin 1	363.039	0.575117	0.152739	3.76606	0.000165844	0.00577237	0.000165844	0.00577237	432.472	467.497	266.83	285.359
ENSCSAG00000017927	FHOD3	formin homology 2 domain containing 3	144.853	0.574759	0.177175	3.24526	0.00117344	0.0247775	0.00117344	0.0247775	175.601	192.277	103.949	107.583
ENSCSAG00000018028	DYM		119.32	0.574444	0.183297	3.13468	0.00172041	0.0320835	0.00172041	0.0320835	148.027	158.346	77.7572	93.1515
ENSCSAG00000001884	SFSWAP	splicing factor SWAP	131.821	0.57394	0.179536	3.19858	0.00138108	0.0274685	0.00138108	0.0274685	172.698	163.372	94.1271	97.0875
ENSCSAG00000004237	NUP98	nucleoporin 98 and 96 precursor	582.22	0.572675	0.142576	4.01722	5.88883e-05	0.0024201	5.88883e-05	0.0024201	716.916	716.325	427.255	468.382
ENSCSAG00000008773	DBN1	drebrin 1	653.508	0.571775	0.150298	3.80549	0.000141521	0.0051279	0.000141521	0.0051279	875.102	740.203	553.304	445.422
ENSCSAG00000015179	USP19		275.121	0.571169	0.159899	3.57371	0.00035196	0.010305	0.00035196	0.010305	355.556	329.258	216.902	198.767
ENSCSAG00000013878	KDM6A	lysine demethylase 6A	389.648	0.567851	0.152685	3.71977	0.000199402	0.00647826	0.000199402	0.00647826	489.07	475.037	275.015	319.47
ENSCSAG00000012353		ribosomal protein L30	3042.12	0.567671	0.141129	4.02255	5.75715e-05	0.00239483	5.75715e-05	0.00239483	3333.52	4135.84	2115.81	2583.31
ENSCSAG00000016248	STK32B	serine/threonine kinase 32B	112.471	0.567401	0.18363	3.09182	0.00198935	0.0358916	0.00198935	0.0358916	142.222	145.779	81.8497	80.0316
ENSCSAG00000013863			65.6706	0.567	0.195291	2.90639	0.00365628	NA	0.00365628	1	98.6848	76.6594	40.1063	47.2318
ENSCSAG00000017846	MCM7	minichromosome maintenance complex component 7	840.322	0.565195	0.146719	3.85318	0.000116592	0.00441885	0.000116592	0.00441885	1152.29	916.142	689.993	602.861
ENSCSAG00000012887	IGDCC3		34.5589	0.564642	0.195386	2.89608	0.00377858	NA	0.00377858	1	52.2449	46.4983	17.1884	22.3039
ENSCSAG00000007792	SPECC1	sperm antigen with calponin homology and coiled-coil domains 1	386.204	0.562939	0.150338	3.74536	0.000180134	0.0060239	0.000180134	0.0060239	464.399	487.604	293.022	299.79
ENSCSAG00000016212	DIDO1	death inducer-obliterator 1	409.919	0.562755	0.15085	3.73185	0.000190078	0.00632543	0.000190078	0.00632543	516.644	493.888	333.947	295.198
ENSCSAG00000017524	UGGT2	UDP-glucose glycoprotein glucosyltransferase 2	102.022	0.561929	0.188294	2.98449	0.00284048	0.0455947	0.00284048	0.0455947	120.454	143.265	63.0243	81.3436
ENSCSAG00000004499	SRGAP1	SLIT-ROBO Rho GTPase activating protein 1	88.3753	0.561563	0.192637	2.91759	0.00352745	0.0534762	0.00352745	0.0534762	92.8798	138.238	67.9352	54.4477
ENSCSAG00000002283	SLC38A10	solute carrier family 38 member 10	299.273	0.560854	0.165738	3.38586	0.000709559	0.0174123	0.000709559	0.0174123	433.923	312.921	229.179	221.071
ENSCSAG00000010550	NCAPD2	non-SMC condensin I complex subunit D2	1793.88	0.559986	0.132409	4.22949	2.34225e-05	0.00118362	2.34225e-05	0.00118362	2011.43	2362.62	1412.73	1388.74
ENSCSAG00000010665	WDR43		605.17	0.559711	0.146357	3.82476	0.000130901	0.00487983	0.000130901	0.00487983	670.476	815.606	464.906	469.694
ENSCSAG00000009138	BCL6		42.7677	0.558215	0.197082	2.83611	0.00456665	NA	0.00456665	1	55.1474	62.8356	26.1919	26.8959
ENSCSAG00000013953	PLCG1		233.524	0.557678	0.163467	3.41311	0.000642269	0.016228	0.000642269	0.016228	288.798	291.557	182.525	171.215
ENSCSAG00000005551	GPT2	glutamic--pyruvic transaminase 2	477.55	0.557163	0.156091	3.57074	0.00035597	0.0103779	0.00035597	0.0103779	677.732	502.684	365.05	364.734
ENSCSAG00000015715	TGFB2	transforming growth factor beta 2	567.61	0.55569	0.156218	3.55725	0.000374753	0.0108329	0.000374753	0.0108329	624.036	777.904	379.783	488.717
ENSCSAG00000019091	H2AC7	histone H2A type 1-D	343.118	0.554096	0.15979	3.46928	0.000521854	0.0141273	0.000521854	0.0141273	478.912	370.73	267.648	255.183
ENSCSAG00000006894			513.329	0.554043	0.143817	3.85331	0.00011653	0.00441885	0.00011653	0.00441885	638.549	618.302	400.245	396.222
ENSCSAG00000019094		histone H2B type 1-C/E/F/G/I	435.997	0.55399	0.157199	3.52486	0.000423705	0.0119443	0.000423705	0.0119443	587.755	490.117	295.477	370.638
ENSCSAG00000008427	PC	pyruvate carboxylase	111.046	0.553635	0.190163	2.91527	0.00355378	0.053637	0.00355378	0.053637	179.955	108.077	76.1202	80.0316
ENSCSAG00000010141	NSMCE2	NSE2 (MMS21) homolog, SMC5-SMC6 complex SUMO ligase	261.059	0.553381	0.161583	3.42595	0.000612657	0.0157126	0.000612657	0.0157126	304.762	341.825	205.443	192.207
ENSCSAG00000016354	PARP1		236.731	0.552382	0.171509	3.22328	0.00126733	0.0258855	0.00126733	0.0258855	341.043	251.342	193.165	161.375
ENSCSAG00000009420	DHCR7	7-dehydrocholesterol reductase	362.023	0.551301	0.162347	3.39763	0.000679718	0.0168009	0.000679718	0.0168009	516.644	380.783	292.203	258.463
ENSCSAG00000012195	VEGFA		112.071	0.550926	0.184249	2.99135	0.00277744	0.0451135	0.00277744	0.0451135	133.515	152.062	79.3942	83.3116
ENSCSAG00000000272	H2BU1	histone cluster 3, H2bb	36.9679	0.550556	0.195737	2.81591	0.0048639	NA	0.0048639	1	47.8912	56.552	17.1884	26.2399
ENSCSAG00000011791	LTBP1		86.1212	0.549694	0.190753	2.88549	0.003908	0.0571294	0.003908	0.0571294	116.1	106.82	67.1167	54.4477
ENSCSAG00000003856	TANC2		156.74	0.549683	0.178114	3.08671	0.00202383	0.0361428	0.00202383	0.0361428	171.247	223.695	111.316	120.703
ENSCSAG00000017612	KLF12		37.406	0.549188	0.194568	2.82805	0.00468328	NA	0.00468328	1	37.7324	69.1191	17.1884	25.5839
ENSCSAG00000015643	LAMA4	laminin subunit alpha 4	193.61	0.54915	0.169864	3.23454	0.00121841	0.0252644	0.00121841	0.0252644	258.322	224.951	141.6	149.567
ENSCSAG00000017255	MYO10		210.525	0.5487	0.166717	3.2928	0.00099196	0.0219002	0.00099196	0.0219002	255.42	267.679	166.155	152.847
ENSCSAG00000011386	FXR2	FMR1 autosomal homolog 2	198.276	0.548504	0.170775	3.21415	0.00130834	0.0263288	0.00130834	0.0263288	271.383	223.695	156.333	141.695
ENSCSAG00000016241	LOXL2	lysyl oxidase like 2	528.867	0.548488	0.146312	3.74984	0.000176949	0.00597597	0.000176949	0.00597597	653.061	640.923	440.351	381.134
ENSCSAG00000013248	SMAD6	SMAD family member 6	221.51	0.547291	0.17392	3.14964	0.00163471	0.0308762	0.00163471	0.0308762	301.859	252.599	193.165	138.415
ENSCSAG00000014331	DAAM1	dishevelled associated activator of morphogenesis 1	126.453	0.546962	0.183144	2.98835	0.00280489	0.0452362	0.00280489	0.0452362	142.222	178.453	99.8566	85.2796
ENSCSAG00000006235	SH3BP4	SH3 domain binding protein 4	180.788	0.546815	0.171913	3.1829	0.00145808	0.0284201	0.00145808	0.0284201	226.395	224.951	146.511	125.295
ENSCSAG00000007419	CARD10		181.182	0.546453	0.180527	3.03059	0.00244073	0.0414453	0.00244073	0.0414453	265.578	192.277	154.696	112.175
ENSCSAG00000007240	COL6A2	collagen type VI alpha 2 chain	581.178	0.546445	0.158923	3.43992	0.000581881	0.0152904	0.000581881	0.0152904	793.832	639.666	514.016	377.198
ENSCSAG00000005471	PPRC1	PPARG related coactivator 1	128.279	0.545868	0.184519	2.96213	0.00305516	0.0481346	0.00305516	0.0481346	185.76	140.752	103.949	82.6556
ENSCSAG00000016289	TNFRSF10B	TNF receptor superfamily member 10b	82.0453	0.545115	0.190958	2.85672	0.00428038	0.0608349	0.00428038	0.0608349	101.587	110.591	58.9318	57.0717
ENSCSAG00000010417	DIAPH2		87.6376	0.544648	0.191074	2.85115	0.00435618	0.0614991	0.00435618	0.0614991	97.2336	129.441	58.9318	64.9437
ENSCSAG00000018202	GTF2IRD1		112.329	0.544308	0.186356	2.92448	0.00345034	0.0526582	0.00345034	0.0526582	162.54	124.414	87.5792	74.7836
ENSCSAG00000004021		actinin alpha 4	828.674	0.544209	0.140108	3.88505	0.000102311	0.00401128	0.000102311	0.00401128	1069.57	948.817	684.263	612.045
ENSCSAG00000007389			228.908	0.544181	0.164701	3.30573	0.000947279	0.021188	0.000947279	0.021188	281.542	285.273	184.162	164.655
ENSCSAG00000017953	USPL1		76.4582	0.54285	0.192462	2.82185	0.0047748	0.0650174	0.0047748	0.0650174	95.7823	103.05	49.9283	57.0717
ENSCSAG00000017037	REPS1	RALBP1 associated Eps domain containing 1	139.283	0.542777	0.180344	3.01035	0.00260951	0.0430001	0.00260951	0.0430001	155.283	196.047	98.2196	107.583
ENSCSAG00000005276	UPF1	UPF1 RNA helicase and ATPase	522.383	0.542261	0.145434	3.72958	0.0001918	0.00635174	0.0001918	0.00635174	674.83	600.708	412.522	401.47
ENSCSAG00000011581		forkhead box P1	279.749	0.541241	0.169781	3.18804	0.00143242	0.0280593	0.00143242	0.0280593	285.896	409.688	196.439	226.975
ENSCSAG00000017574	INTS1	integrator complex subunit 1	708.889	0.541089	0.149801	3.6131	0.000302553	0.00909258	0.000302553	0.00909258	979.592	755.283	581.133	519.549
ENSCSAG00000002113	RSRC2		131.778	0.541078	0.17958	3.01463	0.00257291	0.0427065	0.00257291	0.0427065	159.637	172.169	98.2196	97.0875
ENSCSAG00000006660	NCL		1014.29	0.53984	0.139403	3.87294	0.00010753	0.00419182	0.00010753	0.00419182	1123.27	1342.17	824.226	767.516
ENSCSAG00000004885	ATRNL1		251.698	0.53964	0.163891	3.29329	0.00099023	0.0219002	0.00099023	0.0219002	291.701	330.515	179.251	205.327
ENSCSAG00000017399	SLC12A7	solute carrier family 12 member 7	296.659	0.539376	0.17634	3.06128	0.00220391	0.0380635	0.00220391	0.0380635	467.302	276.476	234.909	207.951
ENSCSAG00000006443	DAGLA	diacylglycerol lipase alpha	79.6123	0.537922	0.191912	2.80625	0.00501211	0.0675106	0.00501211	0.0675106	101.587	104.307	61.3873	51.1677
ENSCSAG00000000902	ECE1	endothelin converting enzyme 1	148.973	0.536784	0.178381	3.01204	0.00259496	0.0429446	0.00259496	0.0429446	201.723	172.169	120.319	101.679
ENSCSAG00000006728	CNN1	calponin 1	72.6799	0.536528	0.193164	2.78083	0.00542203	0.0708814	0.00542203	0.0708814	97.2336	91.7399	53.2023	48.5437
ENSCSAG00000015342	F2RL1	F2R like trypsin receptor 1	1152.41	0.536074	0.132822	4.03636	5.42869e-05	0.00228608	5.42869e-05	0.00228608	1351.11	1438.93	874.973	944.635
ENSCSAG00000007915	PCSK5		59.7676	0.535934	0.195837	2.73905	0.00616178	NA	0.00616178	1	82.7211	75.4027	37.6509	43.2958
ENSCSAG00000015889	TANC1	tetratricopeptide repeat, ankyrin repeat and coiled-coil containing 1	235.168	0.534765	0.163006	3.28212	0.0010303	0.0224559	0.0010303	0.0224559	294.603	285.273	181.706	179.087
ENSCSAG00000002151	IQGAP3	IQ motif containing GTPase activating protein 3	123.46	0.534609	0.182239	2.93599	0.00332482	0.0510854	0.00332482	0.0510854	169.796	142.008	90.8531	91.1835
ENSCSAG00000003150	GSE1	Gse1 coiled-coil protein	141.936	0.534036	0.180886	2.95552	0.00312139	0.048728	0.00312139	0.048728	188.662	168.399	119.501	91.1835
ENSCSAG00000005928	BRIP1		178.699	0.533556	0.174728	3.05412	0.00225723	0.0387879	0.00225723	0.0387879	216.236	229.978	117.045	151.535
ENSCSAG00000001836	POLE		236.523	0.532919	0.162803	3.2747	0.00105773	0.0229074	0.00105773	0.0229074	287.347	295.327	181.706	181.711
ENSCSAG00000003374	PLAUR		62.0216	0.532697	0.196984	2.71155	0.00669694	NA	0.00669694	1	108.844	57.8087	40.1063	41.3278
ENSCSAG00000010955	NOP56		1860.79	0.531907	0.132346	4.01951	5.83187e-05	0.00241122	5.83187e-05	0.00241122	2304.58	2192.96	1587.07	1358.57
ENSCSAG00000008978	GLDC	glycine decarboxylase	60.9821	0.531657	0.195727	2.71889	0.00655007	NA	0.00655007	1	72.5624	87.9698	43.3803	40.0158
ENSCSAG00000006809	HCFC1	host cell factor C1	588.172	0.531557	0.140948	3.77204	0.00016192	0.00566472	0.00016192	0.00566472	711.111	716.325	464.088	461.166
ENSCSAG00000013407	GPHN		98.3623	0.530905	0.187513	2.83247	0.00461896	0.0636539	0.00461896	0.0636539	116.1	134.468	68.7537	74.1276
ENSCSAG00000012302	VPS13B	vacuolar protein sorting 13 homolog B	930.03	0.52898	0.154399	3.42619	0.000612115	0.0157126	0.000612115	0.0157126	966.531	1306.98	641.702	804.908
ENSCSAG00000015479			6939.76	0.528313	0.154568	3.41844	0.000629806	0.0160318	0.000629806	0.0160318	10315.5	6649.26	5064.86	5729.47
ENSCSAG00000006363	ATG16L1	autophagy related 16 like 1	275.248	0.528256	0.164115	3.21923	0.00128534	0.026097	0.00128534	0.026097	325.079	353.136	186.617	236.159
ENSCSAG00000014130	LGR6		310.99	0.527023	0.175289	3.00895	0.00262153	0.0430942	0.00262153	0.0430942	486.168	289.044	246.368	222.383
ENSCSAG00000002178	POLD1	transcription factor Spi-B	355.263	0.526712	0.161295	3.26732	0.00108572	0.0233653	0.00108572	0.0233653	489.07	383.297	298.751	249.935
ENSCSAG00000010475	DPP9	dipeptidyl peptidase 9	213.719	0.526705	0.167367	3.14898	0.0016384	0.0308762	0.0016384	0.0308762	268.481	258.883	175.977	151.535
ENSCSAG00000004622	GALNT18		373.579	0.525999	0.152098	3.45955	0.000541079	0.0144755	0.000541079	0.0144755	477.46	433.565	297.933	285.359
ENSCSAG00000000907	HSPG2	heparan sulfate proteoglycan 2	2624.82	0.525402	0.133683	3.93056	8.47465e-05	0.00336128	8.47465e-05	0.00336128	3166.62	3168.17	2294.25	1870.25
ENSCSAG00000009751			229.903	0.525065	0.165911	3.16556	0.00154787	0.0296453	0.00154787	0.0296453	281.542	285.273	161.244	191.551
ENSCSAG00000018127			201.604	0.524531	0.168252	3.11872	0.00181637	0.0333287	0.00181637	0.0333287	233.651	263.909	154.696	154.159
ENSCSAG00000012036	MYO1E	myosin IE	239.507	0.523258	0.162491	3.22151	0.00127516	0.0259676	0.00127516	0.0259676	288.798	299.097	185.799	184.335
ENSCSAG00000008933	ZSWIM8		177.724	0.522191	0.174339	2.99756	0.00272152	0.0443108	0.00272152	0.0443108	248.163	193.534	136.689	132.511
ENSCSAG00000008818	CHRDL1	chordin like 1	305.924	0.522125	0.159312	3.27808	0.00104515	0.0227071	0.00104515	0.0227071	377.324	371.987	215.265	259.119
ENSCSAG00000004975		factor interacting with PAPOLA and CPSF1	276.787	0.521677	0.159597	3.26967	0.00107675	0.0232455	0.00107675	0.0232455	341.043	336.799	202.987	226.319
ENSCSAG00000005123			107.143	0.521449	0.189637	2.75068	0.00594719	0.0746667	0.00594719	0.0746667	105.941	167.143	79.3942	76.0956
ENSCSAG00000007423	PPAN	peter pan homolog	134.454	0.52087	0.179784	2.89937	0.00373914	0.0555739	0.00373914	0.0555739	162.54	173.426	108.042	93.8075
ENSCSAG00000013741	NIBAN2	niban apoptosis regulator 2	953.245	0.520606	0.152886	3.4061	0.000658986	0.0165195	0.000658986	0.0165195	1355.46	966.411	793.123	697.98
ENSCSAG00000016871	ANAPC1	anaphase promoting complex subunit 1	564.661	0.520427	0.142656	3.64902	0.000263245	0.00801722	0.000263245	0.00801722	687.891	678.624	462.451	429.678
ENSCSAG00000016730	SGK1	serum/glucocorticoid regulated kinase 1	35.9143	0.519824	0.196058	2.65605	0.00790624	NA	0.00790624	1	47.8912	51.5252	21.2809	22.9599
ENSCSAG00000008514	ADCY3	adenylate cyclase 3	167.45	0.519395	0.179221	2.90129	0.00371628	0.0554759	0.00371628	0.0554759	230.748	187.25	144.874	106.927
ENSCSAG00000011216		ribosomal protein S2	1396.44	0.518359	0.132703	3.90649	9.36467e-05	0.00369282	9.36467e-05	0.00369282	1570.25	1790.81	1131.16	1093.55
ENSCSAG00000004971	ZNF43		921.722	0.518295	0.197039	2.64153	0.00825322	0.0934699	0.00825322	0.0934699	938.957	1521.88	538.571	687.484
ENSCSAG00000012253	TCERG1	transcription elongation regulator 1	236.4	0.518281	0.173315	2.99037	0.0027864	0.0451516	0.0027864	0.0451516	253.968	331.772	153.877	205.983
ENSCSAG00000016722	PARP8	poly(ADP-ribose) polymerase family member 8	108.535	0.51803	0.187277	2.76638	0.00566821	0.072413	0.00566821	0.072413	120.454	154.575	71.2092	87.9035
ENSCSAG00000013704	EIF4G1		1055.76	0.517161	0.13995	3.69603	0.000218999	0.00691672	0.000218999	0.00691672	1352.56	1196.39	905.257	768.828
ENSCSAG00000008462	MCM2		262.128	0.517075	0.165917	3.11845	0.00181806	0.0333287	0.00181806	0.0333287	362.812	281.503	211.991	192.207
ENSCSAG00000007501	ITGB2		88.2287	0.516013	0.190898	2.7061	0.00680792	0.0819112	0.00680792	0.0819112	129.161	96.7668	61.3873	65.5997
ENSCSAG00000000171	NGF	nerve growth factor	54.4182	0.515648	0.196535	2.62594	0.00864109	NA	0.00864109	1	68.2086	75.4027	36.0139	38.0478
ENSCSAG00000011700	HMGXB3		338.179	0.515308	0.155421	3.31703	0.000909814	0.0204843	0.000909814	0.0204843	433.923	389.58	276.652	252.559
ENSCSAG00000010496	NOP58		519.931	0.514491	0.160214	3.21148	0.00132053	0.026496	0.00132053	0.026496	632.744	638.409	329.036	479.533
ENSCSAG00000007613	UBQLN1		555.438	0.513781	0.154394	3.3279	0.000875048	0.0199651	0.000875048	0.0199651	621.134	730.149	379.783	490.685
ENSCSAG00000018063	AKAP17A		79.9563	0.5134	0.194824	2.6417	0.00824914	0.0934699	0.00824914	0.0934699	113.197	94.2533	70.3907	41.9838
ENSCSAG00000012304	KPNA4		481.987	0.513306	0.15121	3.39503	0.000686213	0.0169002	0.000686213	0.0169002	563.084	606.992	341.313	416.558
ENSCSAG00000013992	SLC25A25	solute carrier family 25 member 25	74.1008	0.513275	0.194649	2.6425	0.00822956	0.0934699	0.00822956	0.0934699	113.197	79.1728	58.1133	45.9198
ENSCSAG00000002243	ETS1	ETS proto-oncogene 1, transcription factor	494.991	0.512958	0.144698	3.54576	0.000391483	0.0112214	0.000391483	0.0112214	592.109	604.478	383.875	399.502
ENSCSAG00000017763	LAMA3	laminin subunit alpha 3	363.71	0.512916	0.152036	3.3745	0.000739491	0.0178056	0.000739491	0.0178056	438.277	444.876	275.833	295.854
ENSCSAG00000004049	NFKB1	nuclear factor kappa B subunit 1	116.85	0.512829	0.182751	2.80848	0.00497755	0.0672413	0.00497755	0.0672413	149.478	143.265	90.0347	84.6236
ENSCSAG00000008982	PLAU		102.683	0.512671	0.186804	2.74754	0.00600449	0.0748859	0.00600449	0.0748859	133.515	125.671	82.6682	68.8796
ENSCSAG00000012022	GMPS	guanine monophosphate synthase	576.598	0.512404	0.143049	3.58275	0.000339994	0.010103	0.000339994	0.010103	724.172	668.57	441.988	471.662
ENSCSAG00000005024	TUBGCP6	tubulin gamma complex associated protein 6	80.9789	0.5123	0.191455	2.67885	0.00738765	0.0874974	0.00738765	0.0874974	111.746	95.5101	58.9318	57.7277
ENSCSAG00000015940	LAMA5	laminin subunit alpha 5	966.041	0.5121	0.147986	3.46131	0.000537545	0.0144375	0.000537545	0.0144375	1253.88	1084.54	861.877	663.869
ENSCSAG00000001391	RABGGTB	Rab geranylgeranyltransferase subunit beta	1985.16	0.512042	0.127081	4.02957	5.58795e-05	0.00233871	5.58795e-05	0.00233871	2333.61	2424.2	1648.45	1534.38
ENSCSAG00000007261	SLC22A23		233.453	0.510237	0.163714	3.11776	0.00182228	0.0333287	0.00182228	0.0333287	287.347	284.017	173.521	188.927
ENSCSAG00000017069	FHL2	four and a half LIM domains 2	521.755	0.510207	0.149957	3.40324	0.000665912	0.0165195	0.000665912	0.0165195	696.599	568.033	395.334	427.054
ENSCSAG00000013493	PTP4A1		1022.93	0.51019	0.162716	3.13565	0.00171472	0.0320835	0.00171472	0.0320835	1010.07	1490.46	676.078	915.115
ENSCSAG00000003570	CDK17	cyclin dependent kinase 17	402.146	0.508584	0.154321	3.29617	0.000980113	0.0218507	0.000980113	0.0218507	436.825	539.129	311.847	320.782
ENSCSAG00000015337	CRHBP	corticotropin releasing hormone binding protein	8.66878	0.508505	0.144378	3.51616	0.000437836	NA	0.000437836	1	14.5125	18.8507	0	1.31199
ENSCSAG00000012853	TRIB3	tribbles pseudokinase 3	204.998	0.508076	0.181603	2.80112	0.00509253	0.0681201	0.00509253	0.0681201	312.018	199.817	177.614	130.543
ENSCSAG00000004520	ZNF143	zinc finger protein 143	55.8794	0.505762	0.197058	2.56785	0.0102331	NA	0.0102331	1	55.1474	92.9966	36.0139	39.3598
ENSCSAG00000012502	MLLT10	protein AF-10	196.582	0.505437	0.171588	2.94637	0.00321528	0.0497545	0.00321528	0.0497545	213.333	270.193	147.329	155.471
ENSCSAG00000007410	ARID5B		407.475	0.505192	0.160013	3.1574	0.00159182	0.030249	0.00159182	0.030249	425.215	566.777	295.477	342.43
ENSCSAG00000002537			2186.91	0.501701	0.125814	3.98786	6.66711e-05	0.00269145	6.66711e-05	0.00269145	2525.17	2696.9	1752.4	1773.16
ENSCSAG00000015396	PLEKHA2	pleckstrin homology domain containing A2	562.136	0.501164	0.145335	3.4488	0.000563076	0.0150051	0.000563076	0.0150051	631.293	722.609	432.166	462.478
ENSCSAG00000001108	SNIP1		75.7918	0.501092	0.193616	2.58958	0.00960934	0.103267	0.00960934	0.103267	81.2698	113.104	55.6578	53.1357
ENSCSAG00000001797	ZNF687		71.7866	0.500954	0.193977	2.5865	0.00969569	NA	0.00969569	1	91.4286	92.9966	58.1133	44.6078
ENSCSAG00000016489	CHD8	chromodomain helicase DNA binding protein 8	690.271	0.498848	0.148428	3.3611	0.00077634	0.0183895	0.00077634	0.0183895	743.039	921.169	509.105	587.773
ENSCSAG00000008728	FAM193B		44.526	0.498695	0.197158	2.53405	0.0112752	NA	0.0112752	1	62.4036	56.552	30.2844	28.8638
ENSCSAG00000008660	AMOT	angiomotin	74.8495	0.498594	0.192603	2.59145	0.00955727	0.103001	0.00955727	0.103001	94.3311	96.7668	56.4763	51.8237
ENSCSAG00000015380	DTL	denticleless E3 ubiquitin protein ligase homolog	99.4035	0.4982	0.187672	2.65585	0.00791085	0.0919384	0.00791085	0.0919384	111.746	138.238	72.8462	74.7836
ENSCSAG00000002923	BTBD11		39.3182	0.498166	0.196773	2.53576	0.0112204	NA	0.0112204	1	53.6962	52.7819	24.5549	26.2399
ENSCSAG00000009990	NOL6	nucleolar protein 6	157.636	0.498101	0.175332	2.84312	0.00446747	0.0625742	0.00446747	0.0625742	197.37	191.02	129.322	112.831
ENSCSAG00000013679	UBA1	ubiquitin like modifier activating enzyme 1	905.215	0.497777	0.134512	3.70121	0.000214573	0.00680844	0.000214573	0.00680844	1095.69	1070.72	747.288	707.164
ENSCSAG00000008190	EHD4	EH domain containing 4	334.629	0.497556	0.153735	3.23751	0.00120576	0.0251873	0.00120576	0.0251873	412.154	397.121	260.282	268.959
ENSCSAG00000008442	CAMSAP3	calmodulin regulated spectrin associated protein family member 3	49.4734	0.497316	0.197163	2.52567	0.0115478	NA	0.0115478	1	75.4649	56.552	27.8289	38.0478
ENSCSAG00000016859	WDR33	WD repeat domain 33	647.714	0.497111	0.139867	3.55477	0.00037831	0.0108896	0.00037831	0.0108896	751.746	801.782	519.745	517.581
ENSCSAG00000013929	PRPF8	pre-mRNA processing factor 8	1301.36	0.497011	0.141937	3.50183	0.000462074	0.0128664	0.000462074	0.0128664	1369.98	1754.37	1005.93	1075.18
ENSCSAG00000008988	SKIV2L	Ski2 like RNA helicase	141.091	0.495829	0.17803	2.78735	0.00531414	0.0701312	0.00531414	0.0701312	182.857	165.886	111.316	104.303
ENSCSAG00000013670	JAG1	jagged canonical Notch ligand 1	685.234	0.495605	0.138559	3.57746	0.000346944	0.0102461	0.000346944	0.0102461	831.565	810.579	538.571	560.221
ENSCSAG00000005874	VMP1	vacuole membrane protein 1	784.552	0.49542	0.145539	3.40438	0.000663132	0.0165195	0.000663132	0.0165195	830.113	1055.64	628.606	623.853
ENSCSAG00000008910	PPL	periplakin	252.212	0.495379	0.16694	2.96952	0.00298268	0.0474309	0.00298268	0.0474309	335.238	280.247	216.902	176.463
ENSCSAG00000001260	FAF1	Fas associated factor 1	273.004	0.495343	0.163541	3.02966	0.00244832	0.0414453	0.00244832	0.0414453	293.152	370.73	216.902	211.231
ENSCSAG00000001186	PTPRF		262.805	0.495308	0.16132	3.07196	0.00212661	0.0373883	0.00212661	0.0373883	338.141	300.354	211.991	200.735
ENSCSAG00000008913	FAM83H	family with sequence similarity 83 member H	126.579	0.494388	0.184728	2.67966	0.00736966	0.0874362	0.00736966	0.0874362	184.308	131.955	101.494	88.5595
ENSCSAG00000007517	HERC4	HECT and RLD domain containing E3 ubiquitin protein ligase 4	204.334	0.494218	0.173495	2.84883	0.00438804	0.061595	0.00438804	0.061595	219.138	282.76	141.6	173.839
ENSCSAG00000009080	NUP205		190.283	0.493383	0.170074	2.90229	0.00370447	0.0554208	0.00370447	0.0554208	240.907	224.951	139.144	156.127
ENSCSAG00000003117	BANP		117.233	0.493164	0.182627	2.70265	0.00687881	0.0823285	0.00687881	0.0823285	149.478	142.008	90.8531	86.5915
ENSCSAG00000015568	VAV2	vav guanine nucleotide exchange factor 2	451.552	0.493096	0.151546	3.25499	0.00113396	0.0240993	0.00113396	0.0240993	595.011	493.888	371.598	345.71
ENSCSAG00000015999	SH3TC1	SH3 domain and tetratricopeptide repeats 1	96.5122	0.493005	0.188268	2.62168	0.00874986	0.0973761	0.00874986	0.0973761	133.515	109.334	73.6647	69.5356
ENSCSAG00000007111	GSK3B	glycogen synthase kinase 3 beta	256.971	0.492872	0.167318	2.94627	0.00321632	0.0497545	0.00321632	0.0497545	267.03	359.419	198.076	203.359
ENSCSAG00000007429		eukaryotic translation elongation factor 1 epsilon 1	743.206	0.492196	0.157526	3.12491	0.00177862	0.0329721	0.00177862	0.0329721	975.238	824.403	483.732	689.452
ENSCSAG00000000746	ZBTB48	zinc finger and BTB domain containing 48	31.1645	0.492054	0.193309	2.55651	0.0105729	NA	0.0105729	1	53.6962	33.9312	18.0069	19.0239
ENSCSAG00000007035	POLR3E		73.804	0.491743	0.19363	2.5437	0.0109685	0.112353	0.0109685	0.112353	105.941	82.9429	56.4763	49.8557
ENSCSAG00000003266	BCL3		55.1693	0.491557	0.196709	2.49975	0.0124282	NA	0.0124282	1	65.3061	79.1728	33.5584	42.6398
ENSCSAG00000007511	EDN1	endothelin 1	126.683	0.490715	0.181012	2.7124	0.00667981	0.0806543	0.00667981	0.0806543	146.576	167.143	96.5826	96.4315
ENSCSAG00000017333	RNGTT	RNA guanylyltransferase and 5'-phosphatase	150.371	0.490377	0.17903	2.74033	0.0061377	0.0759917	0.0061377	0.0759917	161.088	209.871	120.319	110.207
ENSCSAG00000016879	BCL2L11		47.3528	0.490335	0.197141	2.4896	0.0127888	NA	0.0127888	1	49.3424	76.6594	31.9214	31.4878
ENSCSAG00000010252	SLC4A1AP	solute carrier family 4 member 1 adaptor protein	157.878	0.489096	0.175057	2.79611	0.00517223	0.0689159	0.00517223	0.0689159	201.723	185.993	127.686	116.111
ENSCSAG00000003604	NOX4		56.0684	0.489033	0.196964	2.48313	0.0130232	NA	0.0130232	1	69.6599	77.9161	29.4659	47.2318
ENSCSAG00000009988	TTC28		241.271	0.488323	0.162931	2.99817	0.0027161	0.0443108	0.0027161	0.0443108	278.639	306.638	188.254	191.551
ENSCSAG00000016251	POLR1A	RNA polymerase I subunit A	204.093	0.488209	0.169615	2.87978	0.00397949	0.0577801	0.00397949	0.0577801	269.932	228.721	149.785	167.935
ENSCSAG00000005831	RNF40	ring finger protein 40	285.211	0.488045	0.164568	2.96755	0.00300181	0.0475746	0.00300181	0.0475746	377.324	315.435	248.005	200.079
ENSCSAG00000001479	BCAR3	BCAR3 adaptor protein, NSP family member	82.9256	0.487954	0.190703	2.56052	0.0104515	0.109535	0.0104515	0.109535	100.136	109.334	60.5688	61.6637
ENSCSAG00000004666	MICAL2		261.772	0.487845	0.161801	3.01677	0.00255486	0.0426144	0.00255486	0.0426144	336.689	297.841	214.446	198.111
ENSCSAG00000001250	TRABD2B	TraB domain containing 2B	511.915	0.487411	0.145518	3.35034	0.00080711	0.0188565	0.00080711	0.0188565	595.011	632.126	428.892	391.63
ENSCSAG00000004597	SHROOM3	shroom family member 3	249.243	0.487284	0.161556	3.01741	0.00254941	0.0426144	0.00254941	0.0426144	306.213	297.841	191.528	201.391
ENSCSAG00000010484	NOP2	NOP2 nucleolar protein	157.952	0.486783	0.175081	2.78153	0.0054104	0.0708814	0.0054104	0.0708814	181.406	206.101	120.319	123.983
ENSCSAG00000018000	NUP58	nucleoporin 58	286.109	0.486159	0.160504	3.02973	0.00244774	0.0414453	0.00244774	0.0414453	349.751	343.082	206.261	245.343
ENSCSAG00000015307	EXOC6B		178.73	0.485056	0.176531	2.74794	0.00599712	0.0748859	0.00599712	0.0748859	191.565	247.572	123.593	152.191
ENSCSAG00000016125	WFS1	wolframin ER transmembrane glycoprotein	184.373	0.484629	0.172695	2.80861	0.0049756	0.0672413	0.0049756	0.0672413	240.907	209.871	155.514	131.199
ENSCSAG00000012267	PRKN		28.0752	0.484317	0.189638	2.56897	0.0102001	NA	0.0102001	1	27.5737	52.7819	18.8254	13.1199
ENSCSAG00000010238			951.942	0.483974	0.144763	3.34398	0.000825849	0.0192285	0.000825849	0.0192285	1223.4	1055.64	843.87	684.86
ENSCSAG00000014344	POLA1	DNA polymerase alpha 1, catalytic subunit	309.019	0.48368	0.156997	3.08159	0.00205895	0.0363811	0.00205895	0.0363811	357.007	388.324	234.909	255.839
ENSCSAG00000001002	PPP1R8	protein phosphatase 1 regulatory subunit 8	417.073	0.482863	0.148339	3.25596	0.00113011	0.0240925	0.00113011	0.0240925	496.327	503.941	328.217	339.806
ENSCSAG00000001750			996.641	0.482602	0.138102	3.4952	0.000473713	0.0130837	0.000473713	0.0130837	1264.04	1113.45	848.781	760.3
ENSCSAG00000003431	TAF1D	TATA-box binding protein associated factor, RNA polymerase I subunit D	93.1678	0.48242	0.188371	2.56289	0.0103804	0.109282	0.0103804	0.109282	120.454	113.104	66.2982	72.8156
ENSCSAG00000006593	MTA2		449.575	0.481641	0.148139	3.25229	0.00114481	0.0242543	0.00114481	0.0242543	568.889	508.968	360.957	359.486
ENSCSAG00000008258	DHX16	DEAH-box helicase 16	127.321	0.481217	0.182439	2.64029	0.00828356	0.0934699	0.00828356	0.0934699	177.052	138.238	98.2196	95.7755
ENSCSAG00000011844	PHTF2	putative homeodomain transcription factor 2	108.354	0.481196	0.186823	2.5764	0.00998342	0.10592	0.00998342	0.10592	134.966	135.725	69.5722	93.1515
ENSCSAG00000003445	CEP295		272.795	0.480983	0.164745	2.92003	0.0035	0.0531782	0.0035	0.0531782	323.628	338.055	187.436	242.063
ENSCSAG00000009839	PPARG	peroxisome proliferator activated receptor gamma	221.677	0.48017	0.167156	2.87361	0.00405814	0.0584064	0.00405814	0.0584064	243.81	294.07	177.614	171.215
ENSCSAG00000013905	WDR81	WD repeat domain 81	133.129	0.479209	0.181868	2.63775	0.00834587	0.0937982	0.00834587	0.0937982	185.76	143.265	106.405	97.0875
ENSCSAG00000009949	SAFB	scaffold attachment factor B	320.938	0.478132	0.161252	2.96681	0.00300904	0.0475746	0.00300904	0.0475746	406.349	368.216	284.837	224.351
ENSCSAG00000012319	STK3	serine/threonine kinase 3	863.847	0.477618	0.143094	3.33804	0.000843706	0.0195774	0.000843706	0.0195774	925.896	1136.07	667.893	725.532
ENSCSAG00000011587	EPC1	enhancer of polycomb homolog 1	149.796	0.477512	0.18034	2.64847	0.00808573	0.0928271	0.00808573	0.0928271	187.211	182.223	96.5826	133.167
ENSCSAG00000009584	URB1		153.429	0.477147	0.184331	2.59197	0.00954268	0.103001	0.00954268	0.103001	198.821	180.966	144.055	89.8715
ENSCSAG00000013775	ASB3		58.616	0.475952	0.195883	2.43219	0.015008	NA	0.015008	1	76.9161	74.146	40.1063	43.2958
ENSCSAG00000007854	CARMIL1		218.245	0.475869	0.170805	2.78639	0.00532988	0.0701939	0.00532988	0.0701939	251.066	280.247	148.148	193.519
ENSCSAG00000004817	ANKRD17	ankyrin repeat domain 17	373.687	0.475707	0.154297	3.08368	0.00204455	0.0363811	0.00204455	0.0363811	409.252	487.604	295.477	302.414
ENSCSAG00000015865	HTT	huntingtin	901.543	0.47492	0.136144	3.48875	0.000485286	0.0133493	0.000485286	0.0133493	1015.87	1127.27	721.096	741.932
ENSCSAG00000007624	NUP153	nucleoporin 153	384.71	0.474904	0.153861	3.08708	0.00202131	0.0361428	0.00202131	0.0361428	426.667	496.401	293.022	322.75
ENSCSAG00000010299	PKMYT1		77.5568	0.474714	0.19261	2.46837	0.0135729	0.128247	0.0135729	0.128247	103.039	92.9966	63.0243	51.1677
ENSCSAG00000011378	C1orf112	chromosome unknown C1orf112 homolog	79.8085	0.474062	0.191603	2.47616	0.0132803	0.126381	0.0132803	0.126381	104.49	96.7668	55.6578	62.3197
ENSCSAG00000019080		histone H2A type 1	343.363	0.473603	0.170618	2.77763	0.00547569	0.0711894	0.00547569	0.0711894	510.839	324.231	283.2	255.183
ENSCSAG00000010923	CABIN1	calcineurin binding protein 1	335.23	0.473499	0.156658	3.02384	0.00249592	0.0421464	0.00249592	0.0421464	399.093	405.918	290.566	245.343
ENSCSAG00000002541	HYOU1	hypoxia up-regulated 1	344.606	0.473367	0.17114	2.76802	0.00563979	0.0723208	0.00563979	0.0723208	494.875	343.082	310.21	230.255
ENSCSAG00000005830	RANGAP1	Ran GTPase activating protein 1	374.159	0.472932	0.166482	2.8425	0.00447614	0.0625742	0.00447614	0.0625742	532.608	373.243	325.762	265.023
ENSCSAG00000006727	IKBKG		70.0786	0.472479	0.195715	2.42026	0.0155094	NA	0.0155094	1	104.49	75.4027	59.7503	40.6718
ENSCSAG00000016827	ERCC3	ERCC excision repair 3, TFIIH core complex helicase subunit	244.296	0.472061	0.161964	2.91601	0.00354543	0.0536296	0.00354543	0.0536296	296.054	292.814	198.076	190.239
ENSCSAG00000015766	FAM193A		175.121	0.471929	0.178858	2.6404	0.00828087	0.0934699	0.00828087	0.0934699	188.662	240.032	156.333	115.455
ENSCSAG00000011582	GTF3C3	general transcription factor IIIC subunit 3	135.631	0.471567	0.180156	2.61865	0.00882794	0.0976081	0.00882794	0.0976081	149.478	183.48	103.949	105.615
ENSCSAG00000016944	TNFAIP3	TNF alpha induced protein 3	24.2812	0.470874	0.188964	2.50196	0.0123506	NA	0.0123506	1	30.4762	38.958	13.9144	13.7759
ENSCSAG00000005129	VTI1A	vesicle transport through interaction with t-SNAREs 1A	101.121	0.470759	0.18644	2.52658	0.0115179	0.115722	0.0115179	0.115722	119.002	131.955	76.1202	77.4076
ENSCSAG00000012401	WDR75	WD repeat domain 75	163.708	0.469937	0.173916	2.70322	0.00686703	0.0823285	0.00686703	0.0823285	190.113	208.614	123.593	132.511
ENSCSAG00000013880	SLCO5A1	solute carrier organic anion transporter family member 5A1	35.5413	0.469926	0.195801	2.40442	0.0161982	NA	0.0161982	1	42.0862	54.0386	23.7364	22.3039
ENSCSAG00000014523	ATF2	activating transcription factor 2	533.707	0.468863	0.159977	2.93087	0.0033801	0.0518181	0.0033801	0.0518181	576.145	707.528	358.502	492.653
ENSCSAG00000004777	EIF3A		1388.71	0.468623	0.134465	3.48556	0.000491114	0.0134553	0.000491114	0.0134553	1773.42	1519.36	1160.63	1101.42
ENSCSAG00000008816	OPLAH	5-oxoprolinase, ATP-hydrolysing	137.956	0.468492	0.189088	2.48191	0.0130681	0.125387	0.0130681	0.125387	216.236	128.185	119.501	87.9035
ENSCSAG00000013545	STPG4		19.2113	0.467852	0.181781	2.59104	0.00956862	NA	0.00956862	1	24.6712	32.6745	9.00347	10.4959
ENSCSAG00000007877	HKDC1	hexokinase domain containing 1	1939.08	0.467273	0.130453	3.58227	0.000340616	0.010103	0.000340616	0.010103	2308.93	2278.42	1694.29	1474.68
ENSCSAG00000016339	LARS2	leucyl-tRNA synthetase 2, mitochondrial	159.545	0.467255	0.176352	2.65191	0.00800382	0.0926526	0.00800382	0.0926526	214.785	174.683	129.322	119.391
ENSCSAG00000012296	SRSF7		282.703	0.467043	0.157955	2.95805	0.00309594	0.0485529	0.00309594	0.0485529	345.397	333.028	226.724	225.663
ENSCSAG00000000790	MTOR	mechanistic target of rapamycin kinase	260.864	0.466677	0.161312	2.89409	0.00380253	0.0560278	0.00380253	0.0560278	323.628	304.124	197.258	218.447
ENSCSAG00000009241	TRIP10	thyroid hormone receptor interactor 10	134.425	0.466188	0.182835	2.55248	0.0106958	0.110268	0.0106958	0.110268	193.016	138.238	104.768	101.679
ENSCSAG00000015117	FER	FER tyrosine kinase	88.4347	0.465985	0.190019	2.45514	0.0140831	0.130464	0.0140831	0.130464	121.905	99.2802	66.2982	66.2557
ENSCSAG00000018024	SMAD7	SMAD family member 7	308.56	0.465912	0.161149	2.89287	0.00381744	0.0561262	0.00381744	0.0561262	394.739	346.852	270.922	221.727
ENSCSAG00000010159	SQLE	squalene epoxidase	329.031	0.465604	0.160935	2.89417	0.00380162	0.0560278	0.00380162	0.0560278	439.728	351.879	243.094	281.423
ENSCSAG00000017278	TMEM131	transmembrane protein 131	239.278	0.464592	0.168688	2.75447	0.00587879	0.0739946	0.00587879	0.0739946	256.871	321.718	171.884	206.639
ENSCSAG00000012995	SLC25A13		503.212	0.464548	0.14444	3.21687	0.00129597	0.0262348	0.00129597	0.0262348	584.853	612.018	402.7	413.278
ENSCSAG00000007759	AP1S3	adaptor related protein complex 1 subunit sigma 3	32.704	0.464338	0.192498	2.41591	0.0156958	NA	0.0156958	1	31.9274	59.0654	15.5514	24.2719
ENSCSAG00000013377	PROSER2	proline and serine rich 2	150.668	0.463964	0.183001	2.53845	0.0111343	0.113513	0.0111343	0.113513	193.016	177.196	139.963	92.4955
ENSCSAG00000011463	HSPD1		427.532	0.463586	0.151358	3.06336	0.00218869	0.0379929	0.00218869	0.0379929	499.229	521.535	316.758	372.606
ENSCSAG00000013503	ABCC5	ATP binding cassette subfamily C member 5	160.631	0.462462	0.174326	2.6541	0.00795208	0.0922604	0.00795208	0.0922604	194.467	196.047	119.501	132.511
ENSCSAG00000008282	PARP12	poly(ADP-ribose) polymerase family member 12	104.005	0.462292	0.186217	2.48529	0.0129446	0.12477	0.0129446	0.12477	137.868	119.388	82.6682	76.0956
ENSCSAG00000011605	SNX5		716.659	0.46195	0.145921	3.16614	0.00154474	0.0296453	0.00154474	0.0296453	756.1	947.56	594.229	568.749
ENSCSAG00000008018	ABCC1	ATP binding cassette subfamily C member 1	577.015	0.461374	0.142663	3.23477	0.0012174	0.0252644	0.0012174	0.0252644	671.928	697.475	488.643	450.014
ENSCSAG00000017246	ALPK3		10.4516	0.461337	0.156087	3.04285	0.00234348	NA	0.00234348	1	15.9637	20.1074	2.45549	3.27998
ENSCSAG00000015852	SEC16A		234.36	0.461322	0.16732	2.75899	0.00579811	0.0733835	0.00579811	0.0733835	285.896	278.99	207.898	164.655
ENSCSAG00000000058			110.295	0.461316	0.184902	2.49695	0.0125266	0.123137	0.0125266	0.123137	146.576	125.671	81.0312	87.9035
ENSCSAG00000012567	TCP1	t-complex 1	1126.36	0.460767	0.132303	3.48298	0.000495856	0.0135309	0.000495856	0.0135309	1280	1381.13	910.168	934.139
ENSCSAG00000017531	FAM20C	FAM20C golgi associated secretory pathway kinase	353.566	0.460454	0.159015	2.89716	0.00376554	0.0558447	0.00376554	0.0558447	470.204	377.013	302.025	265.023
ENSCSAG00000009793	MOB3B		143.317	0.459664	0.184323	2.4952	0.0125886	0.12339	0.0125886	0.12339	142.222	209.871	122.775	98.3995
ENSCSAG00000002534	RPS11	ribosomal protein S11	1960.92	0.459372	0.128476	3.57575	0.000349224	0.010269	0.000349224	0.010269	2345.22	2279.67	1525.68	1693.13
ENSCSAG00000015656	LETM1	leucine zipper and EF-hand containing transmembrane protein 1	605.761	0.458349	0.144541	3.17197	0.00151408	0.0293439	0.00151408	0.0293439	750.295	687.421	525.475	459.854
ENSCSAG00000012749	PTBP1	polypyrimidine tract binding protein 1	753.109	0.458248	0.136634	3.35438	0.000795443	0.0186478	0.000795443	0.0186478	883.81	897.292	611.417	619.917
ENSCSAG00000011566	KMT2E	lysine methyltransferase 2E (inactive)	331.879	0.457309	0.168291	2.7175	0.00657769	0.0797506	0.00657769	0.0797506	322.177	477.55	246.368	281.423
ENSCSAG00000008841	TMEM44		96.6638	0.457291	0.187811	2.43768	0.014782	0.1341	0.014782	0.1341	126.259	113.104	77.7572	69.5356
ENSCSAG00000012758	MISP	mitotic spindle positioning	53.3372	0.456893	0.197163	2.32575	0.020032	NA	0.020032	1	84.1723	55.2953	45.0173	28.8638
ENSCSAG00000012606	LAMC1		513.497	0.456671	0.144797	3.15456	0.00160739	0.0304601	0.00160739	0.0304601	583.401	634.639	423.981	411.966
ENSCSAG00000009233	EIF4A2		10846.3	0.456623	0.119731	3.81381	0.000136842	0.00504614	0.000136842	0.00504614	12399.5	13079.9	8850.41	9055.38
ENSCSAG00000009220	TNXB		80.0739	0.456604	0.192862	2.37142	0.0177201	0.148834	0.0177201	0.148834	101.587	99.2802	69.5722	49.8557
ENSCSAG00000016079	SLCO4A1		61.1203	0.456443	0.195681	2.33555	0.0195148	NA	0.0195148	1	85.6236	70.3758	42.5618	45.9198
ENSCSAG00000015357	GAK	cyclin G associated kinase	453.74	0.456322	0.158572	2.87908	0.00398835	0.0577801	0.00398835	0.0577801	593.56	491.374	412.522	317.502
ENSCSAG00000009828	ZFAT	zinc finger and AT-hook domain containing	87.0356	0.455425	0.190035	2.39787	0.0164906	0.144121	0.0164906	0.144121	107.392	109.334	60.5688	70.8476
ENSCSAG00000017842	FOXO1	forkhead box O1	42.2397	0.455241	0.196967	2.31611	0.0205524	NA	0.0205524	1	63.8549	47.755	27.8289	29.5198
ENSCSAG00000005103	PIM3	Pim-3 proto-oncogene, serine/threonine kinase	95.8202	0.455095	0.189818	2.40049	0.016373	0.143569	0.016373	0.143569	139.32	99.2802	71.2092	73.4716
ENSCSAG00000008983	LRP5	LDL receptor related protein 5	410.938	0.45508	0.15347	2.96645	0.00301264	0.0475746	0.00301264	0.0475746	538.413	441.106	338.858	325.374
ENSCSAG00000007163	KLF11	Kruppel like factor 11	164.897	0.455017	0.175292	2.59659	0.00941542	0.102359	0.00941542	0.102359	179.955	219.924	125.23	134.479
ENSCSAG00000017563	RBM26	RNA binding motif protein 26	190.136	0.454569	0.172428	2.63695	0.00836546	0.0938638	0.00836546	0.0938638	203.175	256.369	144.874	156.127
ENSCSAG00000005788	TEX14		138.43	0.454305	0.181516	2.50567	0.012222	0.121366	0.012222	0.121366	191.565	147.035	115.408	99.7115
ENSCSAG00000004926	PLXNB2	plexin B2	934.283	0.454013	0.140683	3.22787	0.00124717	0.025627	0.00124717	0.025627	1190.02	1020.45	810.312	716.348
ENSCSAG00000012551	WDR90		26.1432	0.453479	0.190939	2.38496	0.017081	NA	0.017081	1	39.1837	33.9312	16.3699	15.0879
ENSCSAG00000005686	CKAP5	cytoskeleton associated protein 5	764.607	0.453191	0.136957	3.30956	0.000934417	0.0209691	0.000934417	0.0209691	927.347	878.441	619.602	633.037
ENSCSAG00000006762	MTMR10	myotubularin related protein 10	616.653	0.452359	0.15371	2.94306	0.00324981	0.0500456	0.00324981	0.0500456	670.476	798.012	434.622	563.501
ENSCSAG00000006562	PHLDB2		638.337	0.452092	0.142596	3.17085	0.00151995	0.0293742	0.00151995	0.0293742	712.562	798.012	500.92	541.853
ENSCSAG00000017030	IQGAP1	IQ motif containing GTPase activating protein 1	559.279	0.452001	0.144394	3.13081	0.00174327	0.0324049	0.00174327	0.0324049	628.39	696.218	439.533	472.974
ENSCSAG00000010083			585.371	0.451844	0.141623	3.19122	0.00141674	0.0279335	0.00141674	0.0279335	689.342	694.961	492.735	464.446
ENSCSAG00000012729	SHROOM4	shroom family member 4	128.394	0.45184	0.180413	2.50618	0.0122044	0.121366	0.0122044	0.121366	162.54	150.805	96.5826	103.647
ENSCSAG00000011191	TBL3	transducin beta like 3	135.705	0.451219	0.180416	2.50352	0.0122965	0.121494	0.0122965	0.121494	169.796	160.859	117.045	95.1195
ENSCSAG00000010001	MN1	MN1 proto-oncogene, transcriptional regulator	40.5293	0.450865	0.196876	2.29405	0.0217877	NA	0.0217877	1	58.0499	49.0117	26.1919	28.8638
ENSCSAG00000001617	LRIG2		118.681	0.450526	0.183103	2.46162	0.0138311	0.129594	0.0138311	0.129594	143.673	147.035	84.3052	99.7115
ENSCSAG00000013691			35.474	0.449877	0.195656	2.30567	0.021129	NA	0.021129	1	55.1474	40.2148	22.9179	23.6159
ENSCSAG00000017595	LMO7		182.108	0.449043	0.171803	2.61526	0.00891601	0.0984223	0.00891601	0.0984223	207.528	231.235	153.877	135.791
ENSCSAG00000012374	ARHGAP26	Rho GTPase activating protein 26	180.229	0.44863	0.174181	2.57667	0.00997562	0.10592	0.00997562	0.10592	190.113	245.059	147.329	138.415
ENSCSAG00000003803	ANK2		486.709	0.448464	0.158246	2.83411	0.00459542	0.0635106	0.00459542	0.0635106	542.766	618.302	333.128	452.638
ENSCSAG00000011851	AP3D1	adaptor related protein complex 3 subunit delta 1	657.676	0.448356	0.148745	3.01521	0.00256801	0.0427065	0.00256801	0.0427065	850.431	708.785	582.77	488.717
ENSCSAG00000009327	AKT3	AKT serine/threonine kinase 3	146.207	0.448132	0.177864	2.52068	0.0117128	0.117335	0.0117128	0.117335	161.088	193.534	115.408	114.799
ENSCSAG00000017779	NUFIP1	nuclear FMR1 interacting protein 1	38.9794	0.447878	0.196525	2.28465	0.0223335	NA	0.0223335	1	59.5011	43.9849	26.1919	26.2399
ENSCSAG00000003902	UVRAG	UV radiation resistance associated	180.373	0.447816	0.170619	2.62612	0.00863646	0.0964287	0.00863646	0.0964287	222.041	212.384	140.781	146.287
ENSCSAG00000012423	HSP90AB1	heat shock protein 90 alpha family class B member 1	3450.56	0.447807	0.125862	3.55807	0.00037359	0.0108329	0.00037359	0.0108329	3864.67	4233.86	2956.41	2747.31
ENSCSAG00000002082	KHDC4	KH domain containing 4, pre-mRNA splicing factor	476.583	0.446714	0.145486	3.07121	0.00213193	0.0373883	0.00213193	0.0373883	564.535	563.007	380.601	398.19
ENSCSAG00000013887	CDCA7L		272.8	0.446137	0.163801	2.72434	0.00644304	0.0786304	0.00644304	0.0786304	335.238	317.948	193.984	244.031
ENSCSAG00000007262	ROR2	receptor tyrosine kinase like orphan receptor 2	161.571	0.445642	0.174219	2.5599	0.0104702	0.109551	0.0104702	0.109551	200.272	189.763	134.233	122.015
ENSCSAG00000014164	MNAT1	MNAT1 component of CDK activating kinase	192.312	0.445123	0.171476	2.59651	0.0094175	0.102359	0.0094175	0.102359	208.98	253.856	145.692	160.719
ENSCSAG00000003876	PPFIA2		103.46	0.44493	0.187199	2.37745	0.0174328	0.147735	0.0174328	0.147735	119.002	135.725	71.2092	87.9035
ENSCSAG00000003951		heterogeneous nuclear ribonucleoprotein L	1076.84	0.444523	0.131401	3.38337	0.000716014	0.0174452	0.000716014	0.0174452	1266.94	1262.99	890.525	886.907
ENSCSAG00000010760	ZCCHC7	zinc finger CCHC-type containing 7	188.826	0.444362	0.175366	2.53415	0.0112721	0.114262	0.0112721	0.114262	197.37	258.883	135.052	163.999
ENSCSAG00000014902	XRCC4	X-ray repair cross complementing 4	104.164	0.444321	0.186297	2.38641	0.0170138	0.145301	0.0170138	0.145301	116.1	139.495	81.0312	80.0316
ENSCSAG00000005547		DnaJ heat shock protein family (Hsp40) member A2	71.4419	0.44398	0.193802	2.29208	0.0219009	NA	0.0219009	1	79.8186	99.2802	51.5653	55.1037
ENSCSAG00000011150	TEX10		167.571	0.443634	0.173964	2.55105	0.0107399	0.110343	0.0107399	0.110343	194.467	209.871	123.593	142.351
ENSCSAG00000003120	SLC7A5	solute carrier family 7 member 5	1321.15	0.443261	0.139412	3.17999	0.00147281	0.0286254	0.00147281	0.0286254	1728.44	1384.9	1109.88	1061.4
ENSCSAG00000006841	NSRP1		94.2111	0.442747	0.188139	2.35484	0.0185305	0.152491	0.0185305	0.152491	108.844	123.158	72.0277	72.8156
ENSCSAG00000013985		Rap guanine nucleotide exchange factor 6	106.036	0.442259	0.188144	2.35094	0.0187259	0.153359	0.0187259	0.153359	110.295	150.805	74.4832	88.5595
ENSCSAG00000002581	BRAP		155.862	0.441979	0.177693	2.48794	0.0128486	0.124684	0.0128486	0.124684	182.857	194.79	108.042	137.759
ENSCSAG00000018121	DTX2	deltex E3 ubiquitin ligase 2	47.7171	0.441846	0.197144	2.24473	0.0247852	NA	0.0247852	1	56.5986	66.6057	36.8324	30.8318
ENSCSAG00000015888	PIK3R1	phosphoinositide-3-kinase regulatory subunit 1	293.659	0.440686	0.158709	2.77746	0.00547851	0.0711894	0.00547851	0.0711894	325.079	373.243	234.909	241.407
ENSCSAG00000009771	RFX2		51.0718	0.440492	0.196882	2.24005	0.0250879	NA	0.0250879	1	68.2086	62.8356	35.1954	38.0478
ENSCSAG00000010172	MTSS1		258.852	0.439517	0.165418	2.65752	0.00787179	0.0916405	0.00787179	0.0916405	271.383	346.852	201.35	215.823
ENSCSAG00000005666	MYO9B		440.354	0.439155	0.155033	2.83386	0.00459898	0.0635106	0.00459898	0.0635106	541.315	502.684	401.882	315.534
ENSCSAG00000000842			26.1126	0.439043	0.190966	2.30627	0.0210958	NA	0.0210958	1	33.3787	38.958	16.3699	15.7439
ENSCSAG00000004407	LEMD3	LEM domain containing 3	265.331	0.438904	0.16211	2.70831	0.00676274	0.0815113	0.00676274	0.0815113	288.798	343.082	216.902	212.543
ENSCSAG00000010271	RBM39		378.513	0.438348	0.15218	2.88163	0.0039563	0.0576706	0.0039563	0.0576706	468.753	427.282	320.851	297.166
ENSCSAG00000016273	LYAR		104.551	0.437838	0.186144	2.35321	0.0186123	0.152835	0.0186123	0.152835	119.002	136.982	76.9387	85.2796
ENSCSAG00000013729	TOP3B	DNA topoisomerase III beta	68.5665	0.437662	0.19407	2.25769	0.0239647	NA	0.0239647	1	91.4286	80.4295	49.9283	52.4797
ENSCSAG00000001345	EFCAB7	EF-hand calcium binding domain 7	47.7512	0.437509	0.197136	2.22191	0.0262897	NA	0.0262897	1	55.1474	67.8624	35.1954	32.7998
ENSCSAG00000015492	ARHGEF28	Rho guanine nucleotide exchange factor 28	509.691	0.437037	0.144095	3.03365	0.00241616	0.0412076	0.00241616	0.0412076	586.304	614.532	417.433	420.494
ENSCSAG00000012919	PPP1R9A		317.993	0.436346	0.163668	2.66628	0.00766951	0.0898299	0.00766951	0.0898299	327.982	429.795	237.364	276.831
ENSCSAG00000018578		ribosomal protein L12	84.7972	0.43592	0.193628	2.25124	0.0243701	0.180453	0.0243701	0.180453	101.587	110.591	48.2913	78.7196
ENSCSAG00000017394	RASA3	RAS p21 protein activator 3	79.8674	0.43527	0.192861	2.26037	0.0237986	0.178532	0.0237986	0.178532	116.1	82.9429	61.3873	59.0397
ENSCSAG00000007472	AGTPBP1	ATP/GTP binding protein 1	123.239	0.435049	0.181697	2.39557	0.0165946	0.144177	0.0165946	0.144177	140.771	158.346	94.1271	99.7115
ENSCSAG00000009745	FOXJ2	forkhead box J2	164.33	0.434833	0.17313	2.51321	0.0119637	0.119148	0.0119637	0.119148	197.37	197.304	133.415	129.231
ENSCSAG00000006729	TJP1		433.776	0.434673	0.152059	2.85901	0.00424965	0.0605242	0.00424965	0.0605242	467.302	557.98	340.495	369.326
ENSCSAG00000013173	MCM10	minichromosome maintenance 10 replication initiation factor	157.278	0.43465	0.178602	2.43623	0.0148413	0.134157	0.0148413	0.134157	210.431	169.656	137.507	111.519
ENSCSAG00000013452	PRIM2	DNA primase subunit 2	81.8139	0.433929	0.192053	2.26011	0.0238147	0.178532	0.0238147	0.178532	88.5261	114.361	58.1133	66.2557
ENSCSAG00000007229	NOL10	nucleolar protein 10	110.468	0.433787	0.186082	2.33186	0.0197081	0.158175	0.0197081	0.158175	132.064	138.238	74.4832	97.0875
ENSCSAG00000012540	ARID3A		64.7206	0.433484	0.194811	2.22677	0.0259625	NA	0.0259625	1	76.9161	85.4564	46.6543	49.8557
ENSCSAG00000009459	SLC24A2	solute carrier family 24 member 2	150.115	0.432902	0.175975	2.46128	0.0138442	0.129594	0.0138442	0.129594	174.15	187.25	117.045	122.015
ENSCSAG00000006308	NLE1		85.0351	0.432774	0.191617	2.2622	0.023685	0.178154	0.023685	0.178154	117.551	92.9966	71.2092	58.3837
ENSCSAG00000016824			121.611	0.432478	0.181717	2.38142	0.0172461	0.146831	0.0172461	0.146831	148.027	147.035	91.6716	99.7115
ENSCSAG00000017137	RAI14	retinoic acid induced 14	444.612	0.432389	0.14773	2.92772	0.00341458	0.0522293	0.00341458	0.0522293	544.218	503.941	357.683	372.606
ENSCSAG00000012984	DYNC1I1	dynein cytoplasmic 1 intermediate chain 1	26.4037	0.43234	0.189191	2.2901	0.0220157	NA	0.0220157	1	36.2812	37.7013	10.6405	20.9919
ENSCSAG00000017454	SENP6		327.777	0.431792	0.162897	2.65092	0.00802733	0.0926607	0.00802733	0.0926607	361.361	418.485	230.816	300.446
ENSCSAG00000001347	ROR1	receptor tyrosine kinase like orphan receptor 1	150.201	0.431779	0.178434	2.4204	0.0155033	0.138073	0.0155033	0.138073	163.991	198.56	109.679	128.575
ENSCSAG00000006555	KIF11	kinesin family member 11	323.821	0.431575	0.166669	2.58948	0.00961219	0.103267	0.00961219	0.103267	333.787	438.592	228.361	294.542
ENSCSAG00000005230	METTL15	methyltransferase like 15	44.7029	0.430459	0.196418	2.19153	0.0284137	NA	0.0284137	1	43.5374	74.146	23.7364	37.3918
ENSCSAG00000003970	LEF1		19.6263	0.430355	0.179391	2.41394	0.0157811	NA	0.0157811	1	20.3175	37.7013	7.36647	13.1199
ENSCSAG00000001202	KIF2C	kinesin family member 2C	170.894	0.429912	0.173771	2.47609	0.0132828	0.126381	0.0132828	0.126381	217.687	192.277	145.692	127.919
ENSCSAG00000001582	DDX20	DEAD-box helicase 20	116.452	0.428896	0.183108	2.34361	0.0190981	0.155474	0.0190981	0.155474	140.771	142.008	85.9422	97.0875
ENSCSAG00000015738			10.3015	0.42879	0.15554	2.8304	0.00464892	NA	0.00464892	1	15.9637	18.8507	2.45549	3.93598
ENSCSAG00000010117	KLF7	Kruppel like factor 7	36.1915	0.428564	0.19609	2.19069	0.0284746	NA	0.0284746	1	46.4399	49.0117	27.0104	22.3039
ENSCSAG00000013420	CRPPA		57.3025	0.4278	0.19652	2.17779	0.0294213	NA	0.0294213	1	60.9524	84.1997	40.1063	43.9518
ENSCSAG00000016608	ARHGEF40		224.582	0.426781	0.171528	2.49021	0.0127667	0.124243	0.0127667	0.124243	291.701	245.059	205.443	156.127
ENSCSAG00000009642	ADCY9	adenylate cyclase 9	137.168	0.426166	0.178322	2.39173	0.0167692	0.144177	0.0167692	0.144177	166.893	163.372	112.134	106.271
ENSCSAG00000010349	FLYWCH1	FLYWCH-type zinc finger 1	102.201	0.426156	0.187341	2.27766	0.0227466	0.173576	0.0227466	0.173576	137.868	111.847	84.3052	74.7836
ENSCSAG00000015160	LAMB2	laminin subunit beta 2	121.968	0.426039	0.187561	2.2749	0.0229121	0.174449	0.0229121	0.174449	158.186	139.495	115.408	74.7836
ENSCSAG00000014824	NUP214		160.37	0.425554	0.176189	2.41618	0.0156843	0.139502	0.0156843	0.139502	171.247	213.641	126.049	130.543
ENSCSAG00000014953	DDX31		80.246	0.425426	0.191203	2.22703	0.0259452	0.187498	0.0259452	0.187498	97.2336	100.537	62.2058	61.0077
ENSCSAG00000008192	ZNF250	zinc finger protein 250	128.561	0.424358	0.180149	2.35719	0.018414	0.151741	0.018414	0.151741	158.186	152.062	99.0381	104.959
ENSCSAG00000003313	FBXW7	F-box and WD repeat domain containing 7	201.89	0.424164	0.167237	2.5376	0.0111614	0.113513	0.0111614	0.113513	236.553	243.802	164.518	162.687
ENSCSAG00000016986	SH3RF3		31.332	0.423275	0.194142	2.18341	0.029006	NA	0.029006	1	36.2812	47.755	19.6439	21.6479
ENSCSAG00000002749	HSD17B7		81.5057	0.422586	0.191025	2.21383	0.0268402	0.191331	0.0268402	0.191331	100.136	100.537	59.7503	65.5997
ENSCSAG00000009182	KIF26B		40.1736	0.422165	0.196546	2.15415	0.0312285	NA	0.0312285	1	50.7937	54.0386	33.5584	22.3039
ENSCSAG00000013393	UCHL5		721.864	0.422093	0.15418	2.73781	0.00618503	0.0764193	0.00618503	0.0764193	837.37	864.617	492.735	692.732
ENSCSAG00000007628	KSR1		55.4762	0.422081	0.196885	2.14918	0.0316203	NA	0.0316203	1	75.4649	65.349	48.2913	32.7998
ENSCSAG00000014568	MCTP1		44.8734	0.42141	0.197104	2.13922	0.0324175	NA	0.0324175	1	47.8912	67.8624	30.2844	33.4558
ENSCSAG00000018671	FLRT3	fibronectin leucine rich transmembrane protein 3	344.481	0.421106	0.164419	2.5613	0.0104282	0.109535	0.0104282	0.109535	346.848	470.01	255.371	305.694
ENSCSAG00000010069	ARID4B	AT-rich interaction domain 4B	350.771	0.420692	0.157299	2.67502	0.00747239	0.0881949	0.00747239	0.0881949	368.617	458.7	286.474	289.294
ENSCSAG00000007811	SUPV3L1	Suv3 like RNA helicase	196.276	0.420688	0.173025	2.43277	0.0149839	0.135033	0.0149839	0.135033	211.882	256.369	175.158	141.695
ENSCSAG00000015639	TACC3	transforming acidic coiled-coil containing protein 3	228.271	0.420513	0.168032	2.50444	0.0122647	0.121436	0.0122647	0.121436	288.798	253.856	203.806	166.623
ENSCSAG00000014217	ODF2	outer dense fiber of sperm tails 2	190.17	0.419505	0.171769	2.44427	0.0145146	0.132871	0.0145146	0.132871	242.358	211.127	166.155	141.039
ENSCSAG00000008940			90.2594	0.41947	0.189453	2.21532	0.0267382	0.191159	0.0267382	0.191159	100.136	120.644	68.7537	71.5036
ENSCSAG00000013102	PELP1	proline, glutamate and leucine rich protein 1	178.755	0.419389	0.175413	2.39313	0.0167052	0.144177	0.0167052	0.144177	227.846	199.817	162.062	125.295
ENSCSAG00000002492			250.725	0.418693	0.17506	2.39183	0.0167644	0.144177	0.0167644	0.144177	298.957	301.611	156.333	245.999
ENSCSAG00000014700	SCAPER		79.413	0.418322	0.191378	2.18789	0.0286777	0.201566	0.0286777	0.201566	97.2336	98.0235	61.3873	61.0077
ENSCSAG00000017577			154.874	0.418178	0.18783	2.22808	0.0258753	0.18739	0.0258753	0.18739	146.576	229.978	146.511	96.4315
ENSCSAG00000015454	URGCP		84.1476	0.417641	0.191385	2.18545	0.0288561	0.202319	0.0288561	0.202319	107.392	99.2802	72.8462	57.0717
ENSCSAG00000016343	KDM3A	lysine demethylase 3A	177.262	0.417575	0.172234	2.42577	0.0152758	0.13694	0.0152758	0.13694	197.37	224.951	148.966	137.759
ENSCSAG00000008017	RACK1	receptor for activated C kinase 1	8711.62	0.417175	0.121695	3.42812	0.000607777	0.0157126	0.000607777	0.0157126	10415.6	9803.6	7063.63	7563.64
ENSCSAG00000001309		maestro heat like repeat family member 7	11.6816	0.416887	0.161321	2.64754	0.00810791	NA	0.00810791	1	18.8662	18.8507	5.72948	3.27998
ENSCSAG00000006647	CSKMT	citrate synthase lysine methyltransferase	1656.53	0.415421	0.159748	2.60107	0.0092933	0.101764	0.0092933	0.101764	2284.26	1623.67	1587.88	1130.28
ENSCSAG00000010737	PER1	period circadian regulator 1	64.5371	0.415418	0.195189	2.13196	0.0330105	NA	0.0330105	1	84.1723	76.6594	54.0208	43.2958
ENSCSAG00000011977	ATXN7		65.0704	0.415406	0.195533	2.1288	0.0332711	NA	0.0332711	1	87.0748	75.4027	56.4763	41.3278
ENSCSAG00000015664	NSD2	nuclear receptor binding SET domain protein 2	986.63	0.415391	0.134397	3.09128	0.00199298	0.0358916	0.00199298	0.0358916	1200.18	1098.37	836.504	811.468
ENSCSAG00000008824	ARHGEF18		279.648	0.414964	0.159668	2.60002	0.0093219	0.101913	0.0093219	0.101913	348.299	311.664	221.813	236.815
ENSCSAG00000011594	BIRC6	baculoviral IAP repeat containing 6	577.252	0.41475	0.147375	2.81455	0.00488457	0.0663795	0.00488457	0.0663795	615.329	736.433	456.721	500.525
ENSCSAG00000018231	ZNF407	zinc finger protein 407	78.6473	0.414369	0.192495	2.15393	0.0312455	0.212944	0.0312455	0.212944	84.1723	109.334	61.3873	59.6957
ENSCSAG00000015925	ACVR1	activin A receptor type 1	138.273	0.414117	0.183548	2.2565	0.0240395	0.179467	0.0240395	0.179467	134.966	198.56	104.768	114.799
ENSCSAG00000019054			533.539	0.414019	0.156377	2.64867	0.00808092	0.0928271	0.00808092	0.0928271	702.404	552.953	487.824	390.974
ENSCSAG00000009347	FAF2	Fas associated factor family member 2	169.456	0.413243	0.174134	2.3739	0.0176012	0.148242	0.0176012	0.148242	194.467	209.871	125.23	148.255
ENSCSAG00000007903		PWP2 small subunit processome component	182.185	0.412989	0.174338	2.37106	0.017737	0.148834	0.017737	0.148834	230.748	203.587	164.518	129.887
ENSCSAG00000010611	PFAS	phosphoribosylformylglycinamidine synthase	180.026	0.412754	0.180323	2.29162	0.0219276	0.169989	0.0219276	0.169989	253.968	178.453	163.699	123.983
ENSCSAG00000006059	LHX1	LIM homeobox 1	495.538	0.412675	0.148326	2.78262	0.00539217	0.0708774	0.00539217	0.0708774	535.51	624.585	396.971	425.086
ENSCSAG00000017931	KIAA1328		42.3933	0.412648	0.196988	2.09648	0.0360395	NA	0.0360395	1	46.4399	62.8356	29.4659	30.8318
ENSCSAG00000009318	ZBTB18		106.747	0.412555	0.185619	2.22452	0.0261133	0.187955	0.0261133	0.187955	139.32	119.388	81.0312	87.2475
ENSCSAG00000017684	ATP7B		37.9251	0.412125	0.196459	2.10123	0.0356205	NA	0.0356205	1	53.6962	45.2416	24.5549	28.2079
ENSCSAG00000004350	VAC14	VAC14 component of PIKFYVE complex	416.237	0.411796	0.157208	2.6205	0.00878016	0.0974145	0.00878016	0.0974145	558.73	420.998	342.132	343.086
ENSCSAG00000013047	SUSD6	sushi domain containing 6	51.8285	0.411589	0.197017	2.09257	0.0363877	NA	0.0363877	1	59.5011	71.6325	43.3803	32.7998
ENSCSAG00000017619	BRAT1		127.608	0.411571	0.188309	2.18915	0.0285859	0.201252	0.0285859	0.201252	188.662	121.901	114.59	85.2796
ENSCSAG00000014330	FBN2	fibrillin 2	98.3227	0.411491	0.188021	2.18939	0.0285686	0.201252	0.0285686	0.201252	116.1	123.158	68.7537	85.2796
ENSCSAG00000012081	RORA		15.74	0.410259	0.175135	2.36396	0.0180809	NA	0.0180809	1	21.7687	25.1342	8.18497	7.87196
ENSCSAG00000002284	CIT		211.575	0.409937	0.167793	2.44405	0.0145236	0.132871	0.0145236	0.132871	229.297	271.45	174.34	171.215
ENSCSAG00000008402	TONSL		185.096	0.409929	0.179664	2.28423	0.0223579	0.172117	0.0223579	0.172117	252.517	191.02	173.521	123.327
ENSCSAG00000002706	TUBB3		29.0805	0.409666	0.19312	2.12514	0.0335751	NA	0.0335751	1	39.1837	38.958	17.1884	20.9919
ENSCSAG00000011909	SEMA3C	semaphorin 3C	1649.78	0.409196	0.144071	2.84032	0.00450687	0.062875	0.00450687	0.062875	1725.53	2125.1	1228.56	1519.94
ENSCSAG00000015629	MAP1B	microtubule associated protein 1B	685.004	0.409195	0.143605	2.84978	0.00437501	0.0615388	0.00437501	0.0615388	727.075	870.901	564.763	577.277
ENSCSAG00000003372	ARHGAP10		172.423	0.408911	0.173255	2.36136	0.0182082	0.150565	0.0182082	0.150565	188.662	221.181	144.055	135.791
ENSCSAG00000009870	PPM1G	protein phosphatase, Mg2+/Mn2+ dependent 1G	576.927	0.408877	0.146562	2.79065	0.00526022	0.0696801	0.00526022	0.0696801	728.526	619.559	501.739	457.886
ENSCSAG00000012434	ABCA7	phospholipid-transporting ATPase ABCA7	133.014	0.408836	0.181799	2.25118	0.0243743	0.180453	0.0243743	0.180453	159.637	159.602	120.319	92.4955
ENSCSAG00000017997	ATP8A2		30321	0.408769	0.152149	2.68681	0.00721383	0.0858444	0.00721383	0.0858444	43019.3	28023.4	24008.1	26233.3
ENSCSAG00000012781	EZR		1372.67	0.408284	0.141837	2.87901	0.00398922	0.0577801	0.00398922	0.0577801	1753.11	1446.47	1244.12	1046.97
ENSCSAG00000015487	RAE1	ribonucleic acid export 1	195.026	0.407823	0.169471	2.40818	0.0160323	0.141674	0.0160323	0.141674	240.907	221.181	167.792	150.223
ENSCSAG00000005142			334.015	0.407817	0.156781	2.60238	0.00925799	0.10154	0.00925799	0.10154	391.837	392.094	299.57	252.559
ENSCSAG00000016368	ZRANB3	zinc finger RANBP2-type containing 3	204.747	0.40775	0.168945	2.41423	0.0157686	0.139887	0.0157686	0.139887	223.492	261.396	159.607	174.495
ENSCSAG00000017364	NCAPH	non-SMC condensin I complex subunit H	281.587	0.407176	0.159256	2.55782	0.010533	0.109872	0.010533	0.109872	348.299	314.178	225.087	238.783
ENSCSAG00000014979	DAG1	dystroglycan 1	619.342	0.406837	0.140875	2.88857	0.00386999	0.0567764	0.00386999	0.0567764	716.916	725.122	536.115	499.213
ENSCSAG00000012797	FNDC3B	fibronectin type III domain containing 3B	530.113	0.406699	0.149682	2.71743	0.00657909	0.0797506	0.00657909	0.0797506	552.925	686.164	431.348	450.014
ENSCSAG00000009622	OSBPL10		188.845	0.406545	0.171899	2.36601	0.017981	0.149229	0.017981	0.149229	200.272	247.572	157.97	149.567
ENSCSAG00000003231	CLASRP		27.5146	0.406491	0.192196	2.12152	0.0338782	NA	0.0338782	1	37.7324	36.4446	18.8254	17.0559
ENSCSAG00000013052	MCM3	minichromosome maintenance complex component 3	568.293	0.4064	0.145848	2.78731	0.00531484	0.0701312	0.00531484	0.0701312	695.147	630.869	505.013	442.142
ENSCSAG00000007154	AQR	aquarius intron-binding spliceosomal factor	223.861	0.406338	0.1695	2.39768	0.0164994	0.144121	0.0164994	0.144121	232.2	297.841	171.884	193.519
ENSCSAG00000013605	GOLGA1	golgin A1	446.486	0.406283	0.148495	2.73653	0.00620909	0.0764193	0.00620909	0.0764193	497.778	545.413	357.683	385.07
ENSCSAG00000018141	TCF4	transcription factor 4	49.2542	0.405956	0.197056	2.0637	0.0390458	NA	0.0390458	1	68.2086	56.552	36.8324	35.4238
ENSCSAG00000009808	GART	phosphoribosylglycinamide formyltransferase, phosphoribosylglycinamide synthetase, phosphoribosylaminoimidazole synthetase	415.683	0.405723	0.149471	2.71525	0.00662262	0.0801055	0.00662262	0.0801055	476.009	495.144	360.957	330.622
ENSCSAG00000011295	LAMB1	laminin subunit beta 1	2149.57	0.40488	0.125973	3.21421	0.00130803	0.0263288	0.00130803	0.0263288	2416.33	2558.66	1844.89	1778.41
ENSCSAG00000001355	PDE4B		11.3775	0.404259	0.155062	2.68575	0.0072368	NA	0.0072368	1	10.1587	27.6476	2.45549	5.24797
ENSCSAG00000014933	SSBP2	single stranded DNA binding protein 2	41.2607	0.404242	0.196993	2.05482	0.0398966	NA	0.0398966	1	49.3424	56.552	30.2844	28.8638
ENSCSAG00000016026	GRB10	growth factor receptor bound protein 10	161.13	0.404052	0.175967	2.29734	0.0215992	0.1684	0.0215992	0.1684	203.175	180.966	118.682	141.695
ENSCSAG00000017756	BAIAP2L1		130.979	0.403671	0.179675	2.24818	0.0245647	0.180777	0.0245647	0.180777	150.93	162.116	107.223	103.647
ENSCSAG00000000874	UBR4	ubiquitin protein ligase E3 component n-recognin 4	511.131	0.403669	0.146834	2.75002	0.0059592	0.0746667	0.0059592	0.0746667	635.646	556.723	439.533	412.622
ENSCSAG00000006092	ACACA	acetyl-CoA carboxylase alpha	451.505	0.403577	0.147765	2.73195	0.00629607	0.0772515	0.00629607	0.0772515	506.485	546.669	388.786	364.078
ENSCSAG00000012834	MINDY3	MINDY lysine 48 deubiquitinase 3	96.6856	0.403446	0.188352	2.14274	0.0321339	0.216832	0.0321339	0.216832	108.844	125.671	69.5722	82.6556
ENSCSAG00000017866		trafficking protein particle complex 8	322.467	0.403296	0.164157	2.45691	0.0140137	0.130464	0.0140137	0.130464	343.946	415.971	230.816	299.134
ENSCSAG00000012710	TRDMT1	tRNA aspartic acid methyltransferase 1	37.4047	0.403277	0.196189	2.05776	0.0396136	NA	0.0396136	1	40.6349	56.552	26.1919	26.2399
ENSCSAG00000003727	PLEKHG7		26.3855	0.403042	0.190287	2.12109	0.033914	NA	0.033914	1	30.4762	41.4715	13.9144	19.6799
ENSCSAG00000005165	DUSP5		49.2184	0.402729	0.197127	2.0464	0.0407171	NA	0.0407171	1	56.5986	67.8624	40.9248	31.4878
ENSCSAG00000017643	DIAPH3		96.5717	0.402647	0.18778	2.14676	0.0318123	0.215646	0.0318123	0.215646	121.905	111.847	81.0312	71.5036
ENSCSAG00000014072	HIF1A	hypoxia inducible factor 1 subunit alpha	1104.63	0.402559	0.145714	2.76277	0.00573134	0.0728105	0.00573134	0.0728105	1187.12	1387.41	812.767	1031.23
ENSCSAG00000010453	OGDHL	oxoglutarate dehydrogenase L	234.113	0.401894	0.163231	2.46338	0.0137634	0.129535	0.0137634	0.129535	274.286	276.476	198.076	187.615
ENSCSAG00000015969	CWC27	CWC27 spliceosome associated cyclophilin	103.83	0.401642	0.187324	2.14526	0.0319321	0.216112	0.0319321	0.216112	132.064	119.388	72.0277	91.8395
ENSCSAG00000007208	CDIN1	CDAN1 interacting nuclease 1	48.2636	0.401575	0.197103	2.04009	0.0413415	NA	0.0413415	1	56.5986	65.349	37.6509	33.4558
ENSCSAG00000006455	GIGYF2	GRB10 interacting GYF protein 2	209.055	0.401455	0.169213	2.3742	0.017587	0.148242	0.017587	0.148242	252.517	241.289	188.254	154.159
ENSCSAG00000001561	SLC6A17	solute carrier family 6 member 17	91.4867	0.401295	0.18911	2.12412	0.0336598	0.222291	0.0336598	0.222291	120.454	101.794	69.5722	74.1276
ENSCSAG00000000771	CLSTN1	calsyntenin 1	1352.05	0.400606	0.131098	3.05615	0.00224195	0.0386228	0.00224195	0.0386228	1600.73	1529.42	1188.46	1089.61
ENSCSAG00000002703	SIK3	SIK family kinase 3	158.976	0.400424	0.178117	2.24886	0.0245212	0.180777	0.0245212	0.180777	161.088	217.411	130.141	127.263
ENSCSAG00000010084	TFIP11	tuftelin interacting protein 11	123.719	0.400323	0.185176	2.16479	0.0304037	0.209087	0.0304037	0.209087	168.345	129.441	110.497	86.5915
ENSCSAG00000008332	EPS8	epidermal growth factor receptor pathway substrate 8	646.273	0.39987	0.143891	2.77933	0.00544709	0.0710518	0.00544709	0.0710518	747.392	756.54	496.009	585.149
ENSCSAG00000004449		ribosomal protein L27a	3194.2	0.399003	0.127935	3.11899	0.0018147	0.0333287	0.0018147	0.0333287	3739.86	3643.21	2885.2	2508.53
ENSCSAG00000003510	UBTF		304.851	0.398631	0.157474	2.53262	0.0113212	0.11459	0.0113212	0.11459	364.263	349.366	267.648	238.127
ENSCSAG00000002880	SART3	spliceosome associated factor 3, U4/U6 recycling protein	176.308	0.398599	0.173444	2.3001	0.0214428	0.167563	0.0214428	0.167563	219.138	198.56	156.333	131.199
ENSCSAG00000001986			2180.4	0.398272	0.131918	3.01937	0.00253297	0.0425614	0.00253297	0.0425614	2700.77	2345.02	1927.56	1748.23
ENSCSAG00000009887	ATG7	autophagy related 7	95.6115	0.39789	0.188928	2.10772	0.0350554	0.229069	0.0350554	0.229069	103.039	128.185	81.0312	70.1916
ENSCSAG00000016270	ZBTB49	zinc finger and BTB domain containing 49	46.6585	0.397704	0.197147	2.01968	0.0434166	NA	0.0434166	1	55.1474	62.8356	35.1954	33.4558
ENSCSAG00000011896	FBXO38	F-box protein 38	199.944	0.397575	0.167975	2.36796	0.0178867	0.149172	0.0178867	0.149172	224.943	246.315	164.518	163.999
ENSCSAG00000007961	RRP1B	ribosomal RNA processing 1B	400.225	0.397523	0.150137	2.64855	0.00808389	0.0928271	0.00808389	0.0928271	484.717	448.646	325.762	341.774
ENSCSAG00000010258	NRP2	neuropilin 2	126.257	0.397073	0.181405	2.19089	0.0284599	0.200779	0.0284599	0.200779	149.478	152.062	109.679	93.8075
ENSCSAG00000006066	AATF	apoptosis antagonizing transcription factor	412.042	0.397036	0.151633	2.61944	0.00880736	0.0975386	0.00880736	0.0975386	503.583	457.443	365.05	322.094
ENSCSAG00000015026	ANLN	anillin actin binding protein	251.171	0.396584	0.164884	2.40616	0.0161212	0.142092	0.0161212	0.142092	267.03	322.975	218.539	196.143
ENSCSAG00000004075	ARHGEF17	Rho guanine nucleotide exchange factor 17	247.958	0.396441	0.167616	2.36691	0.0179372	0.149229	0.0179372	0.149229	316.372	267.679	226.724	181.055
ENSCSAG00000003849	MRC2	mannose receptor C type 2	134.163	0.396312	0.184581	2.14959	0.0315878	0.21442	0.0315878	0.21442	158.186	163.372	128.504	86.5915
ENSCSAG00000016158	GPBP1	GC-rich promoter binding protein 1	349.451	0.396063	0.152605	2.5963	0.00942335	0.102359	0.00942335	0.102359	409.252	405.918	297.933	284.703
ENSCSAG00000015804	NOP14	NOP14 nucleolar protein	328.808	0.395996	0.158322	2.50251	0.0123318	0.121494	0.0123318	0.121494	416.508	353.136	289.748	255.839
ENSCSAG00000008244	GSPT1	G1 to S phase transition 1	374.572	0.395989	0.152135	2.60355	0.00922646	0.101357	0.00922646	0.101357	412.154	461.213	312.666	312.254
ENSCSAG00000004762	RPS13		146.736	0.395667	0.191044	2.07041	0.0384141	0.241086	0.0384141	0.241086	132.064	224.951	87.5792	142.351
ENSCSAG00000006914	QTRT2	queuine tRNA-ribosyltransferase accessory subunit 2	51.7545	0.395292	0.196883	2.00957	0.0444765	NA	0.0444765	1	58.0499	71.6325	39.2878	38.0478
ENSCSAG00000016701	EYA4		41.0842	0.39522	0.195876	2.01835	0.0435549	NA	0.0435549	1	36.2812	70.3758	26.1919	31.4878
ENSCSAG00000014794	RNF123	ring finger protein 123	119.957	0.395194	0.1833	2.15785	0.0309393	0.211684	0.0309393	0.211684	158.186	129.441	92.4901	99.7115
ENSCSAG00000015959	MAP4	microtubule associated protein 4	747.663	0.394472	0.140279	2.81238	0.00491766	0.0666964	0.00491766	0.0666964	806.894	926.196	617.965	639.597
ENSCSAG00000012126	DAZAP1	DAZ associated protein 1	331.54	0.394333	0.154355	2.55569	0.0105979	0.110044	0.0105979	0.110044	401.996	371.987	273.378	278.799
ENSCSAG00000012506	NDUFAF6		33.2026	0.394274	0.194838	2.02877	0.0424822	NA	0.0424822	1	39.1837	47.755	26.1919	19.6799
ENSCSAG00000013110	ACTN1	actinin alpha 1	380.767	0.393857	0.15367	2.56362	0.0103588	0.109224	0.0103588	0.109224	406.349	481.32	322.488	312.91
ENSCSAG00000011716	WAC	WW domain containing adaptor with coiled-coil	383.361	0.39385	0.164633	2.3923	0.0167431	0.144177	0.0167431	0.144177	388.934	511.481	274.196	358.83
ENSCSAG00000003248	PDGFC	platelet derived growth factor C	345.209	0.393261	0.158536	2.48113	0.0130968	0.125486	0.0130968	0.125486	355.556	451.159	291.385	282.735
ENSCSAG00000010283	PTPRS		1714.06	0.393201	0.128104	3.06967	0.00214298	0.0374856	0.00214298	0.0374856	2033.2	1921.51	1490.48	1411.05
ENSCSAG00000012549	DHX9	DExH-box helicase 9	571.807	0.39291	0.144616	2.71731	0.00658158	0.0797506	0.00658158	0.0797506	619.683	707.528	467.362	492.653
ENSCSAG00000016060	PPP2R2A	protein phosphatase 2 regulatory subunit Balpha	126.434	0.392672	0.183702	2.13815	0.0325046	0.218125	0.0325046	0.218125	127.71	174.683	99.0381	104.303
ENSCSAG00000005218	KIF18A	kinesin family member 18A	116.838	0.392595	0.186195	2.10868	0.0349718	0.228742	0.0349718	0.228742	127.71	153.319	79.3942	106.927
ENSCSAG00000003541	TMPO	thymopoietin	1062.17	0.392305	0.141087	2.78073	0.00542364	0.0708814	0.00542364	0.0708814	1121.81	1339.65	834.048	953.163
ENSCSAG00000007133	AGFG1		123.023	0.392153	0.181817	2.15801	0.0309267	0.211684	0.0309267	0.211684	136.417	157.089	98.2196	100.367
ENSCSAG00000015853	RAB3GAP2	RAB3 GTPase activating non-catalytic protein subunit 2	242.261	0.392044	0.162891	2.40765	0.0160557	0.141697	0.0160557	0.141697	269.932	297.841	197.258	204.015
ENSCSAG00000004719	MCMBP	minichromosome maintenance complex binding protein	343.999	0.391922	0.157593	2.48731	0.0128714	0.124728	0.0128714	0.124728	370.068	433.565	266.011	306.35
ENSCSAG00000002290	PRKAB1	protein kinase AMP-activated non-catalytic subunit beta 1	79.7289	0.391913	0.192772	2.03608	0.0417428	0.252232	0.0417428	0.252232	113.197	81.6862	63.0243	61.0077
ENSCSAG00000002748	PSMD3	proteasome 26S subunit, non-ATPase 3	503.736	0.391716	0.148487	2.63895	0.00831627	0.0936197	0.00831627	0.0936197	605.17	565.52	455.903	388.35
ENSCSAG00000017893	NOL4	nucleolar protein 4	48.2902	0.390847	0.197028	1.98544	0.0470953	NA	0.0470953	1	43.5374	79.1728	37.6509	32.7998
ENSCSAG00000017200	REV1	REV1 DNA directed polymerase	178.527	0.390596	0.171076	2.28423	0.0223582	0.172117	0.0223582	0.172117	206.077	214.898	141.6	151.535
ENSCSAG00000006258	KANSL2		2494.35	0.390436	0.132169	2.95418	0.00313504	0.0488293	0.00313504	0.0488293	2615.15	3141.78	2087.17	2133.3
ENSCSAG00000018190	PHLPP1		88.3333	0.390123	0.193493	2.01703	0.0436919	0.257843	0.0436919	0.257843	79.8186	135.725	72.8462	64.9437
ENSCSAG00000011384	COG5		107.318	0.389889	0.190084	2.05098	0.0402686	0.247936	0.0402686	0.247936	121.905	138.238	65.4797	103.647
ENSCSAG00000012541	ITGAV	integrin subunit alpha V	3339.69	0.389396	0.133753	2.91139	0.00359826	0.0541883	0.00359826	0.0541883	3575.87	4134.58	2597.91	3050.38
ENSCSAG00000016470	SLC39A14		860.487	0.389263	0.137777	2.82577	0.00471667	0.0643543	0.00471667	0.0643543	1055.06	934.993	708	743.9
ENSCSAG00000002927	CRY1	cryptochrome circadian regulator 1	99.8236	0.388892	0.189355	2.0547	0.039908	0.247053	0.039908	0.247053	98.6848	142.008	81.8497	76.7516
ENSCSAG00000000217	H2AC20	histone cluster 2 H2A family member c	441.407	0.388892	0.150596	2.58302	0.00979389	0.104888	0.00979389	0.104888	544.218	482.577	347.861	390.974
ENSCSAG00000011451	NRDE2	NRDE-2, necessary for RNA interference, domain containing	74.1449	0.388811	0.193134	2.01507	0.0438968	0.258563	0.0438968	0.258563	82.7211	98.0235	61.3873	54.4477
ENSCSAG00000008882	MORC2	MORC family CW-type zinc finger 2	128.87	0.388759	0.180178	2.15884	0.0308624	0.211601	0.0308624	0.211601	149.478	157.089	100.675	108.239
ENSCSAG00000006487	SUN2	Sad1 and UNC84 domain containing 2	255.232	0.388634	0.169071	2.3004	0.0214257	0.167563	0.0214257	0.167563	333.787	266.423	235.727	184.991
ENSCSAG00000015121	FBXL17		75.8031	0.388368	0.192903	2.01406	0.0440035	0.258563	0.0440035	0.258563	85.6236	99.2802	54.0208	64.2877
ENSCSAG00000008412	SREBF1	sterol regulatory element binding transcription factor 1	626.917	0.38828	0.150428	2.58196	0.00982398	0.104957	0.00982398	0.104957	748.844	707.528	593.41	457.886
ENSCSAG00000017180	ZFR	zinc finger RNA binding protein	396.811	0.388227	0.156565	2.47992	0.0131411	0.125734	0.0131411	0.125734	413.605	511.481	308.573	353.582
ENSCSAG00000001741	NOTCH2	notch receptor 2	413.503	0.387798	0.148402	2.61395	0.00895018	0.09864	0.00895018	0.09864	486.168	473.78	347.043	347.022
ENSCSAG00000011846	MED12L		123.359	0.387741	0.185434	2.09124	0.0365064	0.233847	0.0365064	0.233847	121.905	173.426	92.4901	105.615
ENSCSAG00000009722	INF2	inverted formin 2	210.099	0.387734	0.168686	2.30025	0.0214343	0.167563	0.0214343	0.167563	261.225	232.492	186.617	160.063
ENSCSAG00000003699	ANKRD42		27.3542	0.387723	0.191533	2.02754	0.0426069	NA	0.0426069	1	30.4762	42.7282	17.1884	19.0239
ENSCSAG00000001471	RPL5		1997.03	0.387414	0.146323	2.64803	0.00809618	0.0928271	0.00809618	0.0928271	2594.83	2035.87	1870.27	1487.14
ENSCSAG00000019090	H1-3	H1.3 linker histone, cluster member	195.327	0.38722	0.171759	2.256	0.0240708	0.179467	0.0240708	0.179467	258.322	202.331	157.97	162.687
ENSCSAG00000016382	COQ8A	coenzyme Q8A	62.7545	0.387121	0.195783	1.98016	0.0476854	NA	0.0476854	1	89.9773	65.349	45.8358	49.8557
ENSCSAG00000002411	HSPA8	heat shock protein family A (Hsp70) member 8	7092.05	0.386699	0.126149	3.06548	0.00217321	0.0378205	0.00217321	0.0378205	7623.4	8693.93	5803.14	6247.71
ENSCSAG00000002658			2101.66	0.386622	0.127921	3.02257	0.00250639	0.0422187	0.00250639	0.0422187	2384.4	2453.1	1875.99	1693.13
ENSCSAG00000011579	TELO2	telomere maintenance 2	53.981	0.38638	0.196969	1.9653	0.0493794	NA	0.0493794	1	81.2698	54.0386	39.2878	41.3278
ENSCSAG00000001139	MFSD2A	major facilitator superfamily domain containing 2A	29.563	0.385939	0.193535	1.99897	0.0456113	NA	0.0456113	1	37.7324	40.2148	21.2809	19.0239
ENSCSAG00000017284	TRIO	trio Rho guanine nucleotide exchange factor	845.809	0.385553	0.13625	2.83011	0.0046532	0.0637827	0.0046532	0.0637827	979.592	972.694	685.082	745.868
ENSCSAG00000017899	STARD13	StAR related lipid transfer domain containing 13	110.21	0.385536	0.184791	2.08819	0.0367806	0.234819	0.0367806	0.234819	126.259	136.982	94.9456	82.6556
ENSCSAG00000014810			87.1407	0.385359	0.191869	2.01141	0.044282	0.259529	0.044282	0.259529	103.039	108.077	81.0312	56.4157
ENSCSAG00000014710	PELI1	pellino E3 ubiquitin protein ligase 1	336.247	0.384875	0.156812	2.45485	0.0140944	0.130464	0.0140944	0.130464	378.776	404.661	257.827	303.726
ENSCSAG00000014788	SPRED2	sprouty related EVH1 domain containing 2	91.9156	0.384812	0.188953	2.03808	0.0415415	0.252132	0.0415415	0.252132	116.1	105.564	67.9352	78.0636
ENSCSAG00000016943	BUB1	BUB1 mitotic checkpoint serine/threonine kinase	273.288	0.384584	0.161904	2.37594	0.0175043	0.147966	0.0175043	0.147966	312.018	326.745	207.08	247.311
ENSCSAG00000008522	EMP1	epithelial membrane protein 1	50.0268	0.38429	0.197099	1.95381	0.0507243	NA	0.0507243	1	62.4036	62.8356	43.3803	31.4878
ENSCSAG00000015259	CDK13		180.527	0.384259	0.170922	2.24914	0.0245039	0.180777	0.0245039	0.180777	204.626	219.924	144.055	153.503
ENSCSAG00000012609	RBM48	RNA binding motif protein 48	35.7925	0.383756	0.194381	1.97466	0.0483071	NA	0.0483071	1	44.9887	49.0117	16.3699	32.7998
ENSCSAG00000012594	WTAP		213.427	0.383501	0.166056	2.31041	0.0208656	0.164561	0.0208656	0.164561	240.907	258.883	173.521	180.399
ENSCSAG00000015687	RBMS1	RNA binding motif single stranded interacting protein 1	230.007	0.383395	0.172366	2.22438	0.0261227	0.187955	0.0261227	0.187955	243.81	297.841	161.244	217.135
ENSCSAG00000017738	RB1	RB transcriptional corepressor 1	340.732	0.382909	0.164627	2.32599	0.0200193	0.159993	0.0200193	0.159993	359.909	437.336	242.275	323.406
ENSCSAG00000009336	SDCCAG8	SHH signaling and ciliogenesis regulator SDCCAG8	267.208	0.382837	0.160094	2.39214	0.0167506	0.144177	0.0167506	0.144177	297.506	325.488	220.176	225.663
ENSCSAG00000015835	MARCHF7	membrane associated ring-CH-type finger 7	352.565	0.38258	0.159839	2.39379	0.0166752	0.144177	0.0166752	0.144177	387.483	434.822	258.645	329.31
ENSCSAG00000007047	PID1	phosphotyrosine interaction domain containing 1	173.888	0.382246	0.172345	2.21888	0.0264951	0.189664	0.0264951	0.189664	191.565	217.411	141.6	144.975
ENSCSAG00000004450	SEC31A	SEC31 homolog A, COPII coat complex component	338.701	0.382129	0.153598	2.48856	0.012826	0.124643	0.012826	0.124643	384.581	402.148	277.47	290.606
ENSCSAG00000001110	GNL2	G protein nucleolar 2	170.037	0.382028	0.173444	2.20402	0.0275231	0.195383	0.0275231	0.195383	214.785	185.993	135.052	144.319
ENSCSAG00000001455	LRRC8C	leucine rich repeat containing 8 VRAC subunit C	161.767	0.381908	0.179051	2.13312	0.0329152	0.219357	0.0329152	0.219357	168.345	214.898	116.227	147.599
ENSCSAG00000006437	ZSWIM4		114.235	0.381552	0.18664	2.04717	0.0406412	0.248679	0.0406412	0.248679	156.735	116.874	100.675	82.6556
ENSCSAG00000005611	SCD	stearoyl-CoA desaturase	1779.89	0.381335	0.128875	2.95911	0.00308524	0.0484966	0.00308524	0.0484966	1954.83	2136.41	1474.93	1553.4
ENSCSAG00000011612	TTC27	tetratricopeptide repeat domain 27	96.88	0.381273	0.188378	2.02471	0.0428976	0.255896	0.0428976	0.255896	104.49	128.185	72.8462	81.9996
ENSCSAG00000004089	CDH3	cadherin 3	41.7427	0.380789	0.196443	1.94416	0.051876	NA	0.051876	1	68.2086	38.958	30.2844	29.5198
ENSCSAG00000010935	TES	testin LIM domain protein	348.022	0.380698	0.155888	2.44274	0.0145761	0.133117	0.0145761	0.133117	368.617	439.849	296.296	287.326
ENSCSAG00000006508	INCENP		223.358	0.380061	0.168626	2.25544	0.0241055	0.179467	0.0241055	0.179467	264.127	258.883	207.08	163.343
ENSCSAG00000018272	GALNT17		177.201	0.379717	0.173668	2.18772	0.0286897	0.201566	0.0286897	0.201566	191.565	224.951	157.151	135.135
ENSCSAG00000004549	SBF2	SET binding factor 2	222.502	0.379665	0.168371	2.25557	0.0240973	0.179467	0.0240973	0.179467	229.297	291.557	184.162	184.991
ENSCSAG00000012871	ERC2		35.3012	0.379619	0.195856	1.94075	0.0522889	NA	0.0522889	1	40.6349	50.2684	25.3734	24.9279
ENSCSAG00000016017	IPO4		235.767	0.379321	0.170638	2.22475	0.0260979	0.187955	0.0260979	0.187955	312.018	241.289	215.265	174.495
ENSCSAG00000004843	KIFC3		675.627	0.379307	0.155754	2.43612	0.0148459	0.134157	0.0148459	0.134157	911.383	658.517	609.78	522.829
ENSCSAG00000017833	NAA16	N-alpha-acetyltransferase 16, NatA auxiliary subunit	82.5356	0.379045	0.191958	1.9758	0.0481776	0.271787	0.0481776	0.271787	105.941	94.2533	56.4763	73.4716
ENSCSAG00000010302	USP43	ubiquitin specific peptidase 43	74.5463	0.378755	0.193176	1.96366	0.0495698	0.276505	0.0495698	0.276505	94.3311	86.7131	64.6612	52.4797
ENSCSAG00000006253	ZBTB11	zinc finger and BTB domain containing 11	116.264	0.378485	0.18735	2.02014	0.0433686	0.256823	0.0433686	0.256823	117.551	160.859	81.0312	105.615
ENSCSAG00000007965	PCNX3	pecanex 3	487.486	0.378296	0.147792	2.56049	0.0104526	0.109535	0.0104526	0.109535	603.719	524.049	420.707	401.47
ENSCSAG00000018095	PSPC1		111.12	0.378208	0.185118	2.04452	0.040902	0.25	0.040902	0.25	142.222	123.158	82.6682	96.4315
ENSCSAG00000017773			2039.47	0.378189	0.137291	2.75494	0.00587021	0.0739946	0.00587021	0.0739946	2503.4	2192.96	1895.64	1565.86
ENSCSAG00000016150	CAPN2	calpain 2	800.704	0.378045	0.137066	2.75846	0.0058075	0.0733835	0.0058075	0.0733835	891.066	952.587	660.527	698.636
ENSCSAG00000016417	HELZ2	helicase with zinc finger 2	44.4868	0.377976	0.19712	1.92195	0.0546125	NA	0.0546125	1	58.0499	54.0386	37.6509	28.2079
ENSCSAG00000017784	TTC39C		107.862	0.377691	0.185018	2.04328	0.0410245	0.250107	0.0410245	0.250107	126.259	130.698	92.4901	81.9996
ENSCSAG00000003363	SMG9	SMG9 nonsense mediated mRNA decay factor	55.5022	0.377243	0.196964	1.91891	0.0549961	NA	0.0549961	1	62.4036	75.4027	50.7468	33.4558
ENSCSAG00000007807	RPAP1	RNA polymerase II associated protein 1	69.4305	0.377189	0.194787	1.93958	0.0524313	NA	0.0524313	1	82.7211	86.7131	63.0243	45.2638
ENSCSAG00000017533	ABCC4	ATP binding cassette subfamily C member 4	406.37	0.377014	0.153427	2.4577	0.013983	0.130464	0.013983	0.130464	425.215	516.508	334.765	348.99
ENSCSAG00000007898	EIF3D	eukaryotic translation initiation factor 3 subunit D	683.899	0.376932	0.142791	2.64039	0.00828105	0.0934699	0.00828105	0.0934699	848.98	728.893	597.503	560.221
ENSCSAG00000001552	AMPD2	adenosine monophosphate deaminase 2	228.811	0.376894	0.168629	2.23646	0.0253213	0.184554	0.0253213	0.184554	259.773	275.22	213.628	166.623
ENSCSAG00000006335	DGKD		223.537	0.376789	0.165289	2.28094	0.0225519	0.172864	0.0225519	0.172864	275.737	246.315	189.073	183.023
ENSCSAG00000010601	BTBD9		79.7018	0.37643	0.191917	1.96237	0.0497192	0.276885	0.0497192	0.276885	87.0748	105.564	60.5688	65.5997
ENSCSAG00000015744	ZFYVE28	zinc finger FYVE-type containing 28	24.0295	0.376052	0.188554	2.00412	0.0450571	NA	0.0450571	1	34.8299	30.1611	18.0069	13.1199
ENSCSAG00000014674	ASCC3	activating signal cointegrator 1 complex subunit 3	255.286	0.375715	0.160944	2.33532	0.0195265	0.157392	0.0195265	0.157392	287.347	306.638	211.991	215.167
ENSCSAG00000003779	KANSL1	KAT8 regulatory NSL complex subunit 1	525.095	0.375711	0.158601	2.3691	0.0178316	0.149125	0.0178316	0.149125	500.68	718.839	435.44	445.422
ENSCSAG00000002129	NCAPD3	non-SMC condensin II complex subunit D3	289.301	0.375523	0.160943	2.3346	0.0195644	0.157392	0.0195644	0.157392	362.812	310.408	257.008	226.975
ENSCSAG00000010365	SRRM2	serine/arginine repetitive matrix 2	594.975	0.375288	0.145836	2.57369	0.0100621	0.10659	0.0100621	0.10659	624.036	749	498.465	508.397
ENSCSAG00000016090	FAM184A	family with sequence similarity 184 member A	28.3446	0.374992	0.191116	1.96343	0.049596	NA	0.049596	1	29.0249	46.4983	15.5514	22.3039
ENSCSAG00000005959			25.8522	0.374842	0.187879	1.99703	0.0458222	NA	0.0458222	1	27.5737	42.7282	11.459	21.6479
ENSCSAG00000006709			15.1036	0.374512	0.173402	2.17994	0.0292621	NA	0.0292621	1	20.3175	23.8775	9.00347	7.21596
ENSCSAG00000004501	ANXA3	annexin A3	91.5369	0.374486	0.189908	1.97412	0.0483681	0.272475	0.0483681	0.272475	124.807	95.5101	70.3907	75.4396
ENSCSAG00000002590	ATXN2		153.728	0.374097	0.182257	2.0525	0.0401212	0.247699	0.0401212	0.247699	161.088	203.587	103.949	146.287
ENSCSAG00000003990	ERN1	endoplasmic reticulum to nucleus signaling 1	67.2387	0.373906	0.194386	1.9261	0.0540914	NA	0.0540914	1	88.5261	75.4027	53.2023	51.8237
ENSCSAG00000009140	WDR91	WD repeat domain 91	98.6064	0.373846	0.186846	2.0022	0.0452632	0.262305	0.0452632	0.262305	116.1	119.388	76.9387	81.9996
ENSCSAG00000000969	CEP85	centrosomal protein 85	70.2332	0.373269	0.193598	1.92951	0.0536671	NA	0.0536671	1	81.2698	89.2265	54.0208	56.4157
ENSCSAG00000005931	C3orf38	chromosome unknown C3orf38 homolog	66.2147	0.373161	0.19502	1.91398	0.0556223	NA	0.0556223	1	72.5624	89.2265	46.6543	56.4157
ENSCSAG00000012925	CWC22	CWC22 spliceosome associated protein homolog	318.235	0.372979	0.167083	2.23237	0.0255906	0.185632	0.0255906	0.185632	309.116	433.565	242.275	287.982
ENSCSAG00000014058	MYO1C		836.587	0.372545	0.143423	2.59812	0.00937352	0.102314	0.00937352	0.102314	1047.8	879.698	756.291	662.557
ENSCSAG00000014242	PABPC1L		12.2548	0.372403	0.16339	2.32273	0.0201939	NA	0.0201939	1	18.8662	18.8507	7.36647	3.93598
ENSCSAG00000019079	H2BC15	histone H2B type 1-N	136.161	0.372284	0.183974	2.02357	0.0430147	0.255977	0.0430147	0.255977	145.125	178.453	92.4901	128.575
ENSCSAG00000003488			51.6289	0.372123	0.196987	1.89098	0.0586274	NA	0.0586274	1	55.1474	72.8893	41.7433	36.7358
ENSCSAG00000008857	CDAN1	codanin 1	37.5515	0.371941	0.195914	1.90102	0.0572992	NA	0.0572992	1	55.1474	41.4715	22.0994	31.4878
ENSCSAG00000014670	OLA1		247.719	0.371828	0.170982	2.17474	0.0296497	0.206398	0.0296497	0.206398	246.712	333.028	184.162	226.975
ENSCSAG00000011146	AP4E1	adaptor related protein complex 4 subunit epsilon 1	147.327	0.371366	0.176906	2.10018	0.0357133	0.231411	0.0357133	0.231411	168.345	178.453	114.59	127.919
ENSCSAG00000005951	ATF1	activating transcription factor 1	265.837	0.370905	0.164195	2.25953	0.0238504	0.178603	0.0238504	0.178603	317.823	301.611	197.258	246.655
ENSCSAG00000009438	SCAF4	SR-related CTD associated factor 4	119.098	0.370735	0.184711	2.00932	0.0445033	0.260179	0.0445033	0.260179	139.32	143.265	110.497	83.3116
ENSCSAG00000005450	GBF1	golgi brefeldin A resistant guanine nucleotide exchange factor 1	279.032	0.370363	0.158321	2.34025	0.019271	0.155951	0.019271	0.155951	327.982	319.205	230.816	238.127
ENSCSAG00000007026	PDIA4	protein disulfide isomerase family A member 4	712.221	0.370216	0.14627	2.53174	0.0113498	0.114708	0.0113498	0.114708	882.358	759.054	656.434	551.037
ENSCSAG00000012120	LPAR1	lysophosphatidic acid receptor 1	173.216	0.370206	0.180794	2.0476	0.040599	0.248679	0.040599	0.248679	163.991	245.059	127.686	156.127
ENSCSAG00000007548	RANBP9		166.149	0.369722	0.176599	2.09421	0.0362413	0.233243	0.0362413	0.233243	198.821	192.277	118.682	154.815
ENSCSAG00000012026	SVEP1		49.58	0.36972	0.197001	1.87968	0.0601514	NA	0.0601514	1	65.3061	57.8087	38.4694	36.7358
ENSCSAG00000012855	NIBAN1	niban apoptosis regulator 1	340.632	0.369674	0.155885	2.37194	0.017695	0.148834	0.017695	0.148834	381.678	407.174	266.011	307.662
ENSCSAG00000004844	SAP30BP	SAP30 binding protein	417.063	0.369418	0.168537	2.19317	0.028295	0.200237	0.028295	0.200237	589.206	384.554	382.238	312.254
ENSCSAG00000011833	LRP12		554.755	0.369307	0.162123	2.27798	0.0227279	0.173576	0.0227279	0.173576	518.095	770.364	431.348	499.213
ENSCSAG00000005067	RHBDF2		48.6947	0.368977	0.197052	1.87488	0.0608098	NA	0.0608098	1	58.0499	62.8356	38.4694	35.4238
ENSCSAG00000012008	C3orf33		36.5225	0.368881	0.196216	1.88263	0.05975	NA	0.05975	1	49.3424	43.9849	24.5549	28.2079
ENSCSAG00000017192	STXBP5	syntaxin binding protein 5	149.209	0.368647	0.177662	2.07565	0.0379264	0.24009	0.0379264	0.24009	162.54	188.507	114.59	131.199
ENSCSAG00000008362	XAB2	XPA binding protein 2	90.3104	0.368615	0.189672	1.94602	0.0516518	0.281685	0.0516518	0.281685	113.197	103.05	79.3942	65.5997
ENSCSAG00000005179	GRAMD4	GRAM domain containing 4	154.402	0.36859	0.175263	2.1046	0.0353263	0.230398	0.0353263	0.230398	179.955	182.223	133.415	122.015
ENSCSAG00000007674	MBOAT1	membrane bound O-acyltransferase domain containing 1	93.9965	0.368342	0.188896	1.95071	0.0510917	0.280854	0.0510917	0.280854	101.587	123.158	71.2092	80.0316
ENSCSAG00000014051	TRA2A	transformer 2 alpha homolog	214.633	0.368235	0.169536	2.17251	0.0298175	0.20712	0.0298175	0.20712	220.59	280.247	172.703	184.991
ENSCSAG00000011091	PHKA1	phosphorylase kinase regulatory subunit alpha 1	131.168	0.367876	0.181852	2.02457	0.0429119	0.255896	0.0429119	0.255896	143.673	165.886	118.682	96.4315
ENSCSAG00000018800			79.8006	0.367305	0.197086	1.8628	0.062491	0.309551	0.062491	0.309551	85.6236	113.104	35.1954	85.2796
ENSCSAG00000011480	THOP1		106.378	0.367241	0.191099	1.92524	0.0541993	0.287071	0.0541993	0.287071	153.832	101.794	99.0381	70.8476
ENSCSAG00000003045	TENM3		285.934	0.367101	0.162241	2.26306	0.023632	0.178154	0.023632	0.178154	301.859	361.933	223.45	256.495
ENSCSAG00000009399	EXO1	exonuclease 1	141.742	0.36668	0.177927	2.0626	0.0391507	0.244808	0.0391507	0.244808	169.796	163.372	123.593	110.207
ENSCSAG00000014640	CCT4	chaperonin containing TCP1 subunit 4	1080.51	0.366622	0.134267	2.73077	0.00631872	0.0773901	0.00631872	0.0773901	1181.32	1294.41	890.525	955.787
ENSCSAG00000008523	TMEM87A	transmembrane protein 87A	85.2988	0.366422	0.192238	1.9071	0.0565078	0.292486	0.0565078	0.292486	111.746	94.2533	56.4763	78.7196
ENSCSAG00000007913	HK1	hexokinase 1	109.046	0.365884	0.185145	1.97827	0.0478986	0.271399	0.0478986	0.271399	140.771	118.131	90.0347	87.2475
ENSCSAG00000003170	TLL1	tolloid like 1	585.456	0.365434	0.150936	2.42127	0.0154664	0.138073	0.0154664	0.138073	600.816	749	459.995	532.013
ENSCSAG00000016772	NKTR		186.395	0.365423	0.171233	2.13485	0.0327736	0.218983	0.0327736	0.218983	198.821	236.262	153.059	157.439
ENSCSAG00000016353	CCAR2	cell cycle and apoptosis regulator 2	206.661	0.365244	0.168285	2.17191	0.0298621	0.20712	0.0298621	0.20712	253.968	227.465	182.525	162.687
ENSCSAG00000010160	SH3BP5	SH3 domain binding protein 5	61.9155	0.36518	0.196843	1.86042	0.062826	NA	0.062826	1	89.9773	62.8356	58.1133	36.7358
ENSCSAG00000015299			51.2453	0.364581	0.196827	1.85419	0.0637123	NA	0.0637123	1	62.4036	64.0923	38.4694	40.0158
ENSCSAG00000002514	NLRX1	NLR family member X1	111.45	0.36416	0.18569	1.96282	0.049667	0.27682	0.049667	0.27682	148.027	116.874	85.1237	95.7755
ENSCSAG00000003312	ZNF180		49.0517	0.364143	0.197103	1.85127	0.0641311	NA	0.0641311	1	63.8549	57.8087	41.7433	32.7998
ENSCSAG00000010772	UCK2	uridine-cytidine kinase 2	358.082	0.364046	0.152304	2.39113	0.0167965	0.144177	0.0167965	0.144177	412.154	413.458	313.484	293.23
ENSCSAG00000001719	PHGDH	phosphoglycerate dehydrogenase	540.464	0.363906	0.150371	2.42082	0.0154857	0.138073	0.0154857	0.138073	696.599	549.183	460.814	455.262
ENSCSAG00000003661	PICALM	phosphatidylinositol binding clathrin assembly protein	1286.68	0.363838	0.138853	2.62043	0.00878187	0.0974145	0.00878187	0.0974145	1394.65	1555.81	997.748	1198.51
ENSCSAG00000012340	POP1	POP1 homolog, ribonuclease P/MRP subunit	193.435	0.363542	0.168871	2.15416	0.0312275	0.212944	0.0312275	0.212944	229.297	221.181	167.792	155.471
ENSCSAG00000004893	FAM160B1	family with sequence similarity 160 member B1	161.9	0.363508	0.183633	1.97925	0.0477884	0.271225	0.0477884	0.271225	156.735	226.208	110.497	154.159
ENSCSAG00000006061	FMNL3	formin like 3	99.3647	0.363148	0.186645	1.94753	0.0514708	0.281561	0.0514708	0.281561	120.454	115.617	82.6682	78.7196
ENSCSAG00000002910	FAT1		1285.96	0.362777	0.129303	2.80592	0.00501728	0.0675106	0.00501728	0.0675106	1470.11	1467.84	1102.52	1103.39
ENSCSAG00000003552	AXL		2262.39	0.362682	0.12971	2.79632	0.00516878	0.0689159	0.00516878	0.0689159	2731.25	2438.02	2025.78	1854.5
ENSCSAG00000010764	ING3	inhibitor of growth family member 3	34.9232	0.362039	0.195007	1.85705	0.0633038	NA	0.0633038	1	43.5374	46.4983	18.8254	30.8318
ENSCSAG00000011034	GABBR2	gamma-aminobutyric acid type B receptor subunit 2	34.6597	0.362025	0.194724	1.86628	0.0620019	NA	0.0620019	1	46.4399	42.7282	31.1029	18.3679
ENSCSAG00000005943	SSRP1	structure specific recognition protein 1	565.199	0.361864	0.147191	2.45922	0.0139239	0.130121	0.0139239	0.130121	703.855	595.681	503.376	457.886
ENSCSAG00000016034	ZSWIM6		94.0093	0.361592	0.190483	1.89886	0.0575827	0.295805	0.0575827	0.295805	91.4286	133.211	75.3017	76.0956
ENSCSAG00000006565	IDE		329.073	0.361437	0.158324	2.28327	0.0224142	0.172195	0.0224142	0.172195	359.909	400.891	253.734	301.758
ENSCSAG00000008375	SPTBN2		68.6695	0.361386	0.194082	1.86463	0.0622327	NA	0.0622327	1	85.6236	80.4295	58.1133	50.5117
ENSCSAG00000006719	ZNF627		84.6084	0.361177	0.191693	1.88446	0.0595026	0.300909	0.0595026	0.300909	89.9773	113.104	60.5688	74.7836
ENSCSAG00000005781	HDLBP		1900.32	0.360972	0.125975	2.86562	0.00416198	0.0596492	0.00416198	0.0596492	2168.16	2166.57	1604.25	1662.3
ENSCSAG00000014575	MAP7D2		6.05008	0.360952	0.129247	2.89781	0.0037578	NA	0.0037578	1	10.1587	12.5671	0.818497	0.655997
ENSCSAG00000003289			38.1117	0.360655	0.195798	1.84804	0.0645969	NA	0.0645969	1	60.9524	36.4446	29.4659	25.5839
ENSCSAG00000009579	ERGIC1		123.712	0.360646	0.181419	1.98922	0.0466764	0.267739	0.0466764	0.267739	137.868	153.319	103.949	99.7115
ENSCSAG00000013103	HSPA9	heat shock protein family A (Hsp70) member 9	1659.39	0.36048	0.130482	2.76293	0.00572852	0.0728105	0.00572852	0.0728105	2005.62	1784.53	1396.36	1451.06
ENSCSAG00000015305	RCOR3	REST corepressor 3	51.2852	0.360364	0.197064	1.82883	0.0674247	NA	0.0674247	1	56.5986	70.3758	33.5584	44.6078
ENSCSAG00000011357	CREM	cAMP responsive element modulator	92.236	0.359744	0.189857	1.89552	0.0580236	0.296285	0.0580236	0.296285	94.3311	125.671	72.8462	76.0956
ENSCSAG00000011690	CSF1R	colony stimulating factor 1 receptor	24.3088	0.359683	0.189245	1.90784	0.0564116	NA	0.0564116	1	33.3787	31.4178	18.0069	14.4319
ENSCSAG00000010954	DZIP1L	DAZ interacting zinc finger protein 1 like	71.3239	0.359122	0.193872	1.8553	0.0635534	NA	0.0635534	1	94.3311	77.9161	60.5688	52.4797
ENSCSAG00000007693	DOCK10		70.9168	0.357727	0.19514	1.83294	0.0668109	NA	0.0668109	1	75.4649	96.7668	45.8358	65.5997
ENSCSAG00000016332	SDE2	SDE2 telomere maintenance homolog	155.248	0.357514	0.176051	2.03155	0.0421997	0.253808	0.0421997	0.253808	178.503	184.737	118.682	139.071
ENSCSAG00000013471		minichromosome maintenance 8 homologous recombination repair factor	86.4625	0.357438	0.190426	1.87781	0.0604067	0.30368	0.0604067	0.30368	97.2336	109.334	63.8428	75.4396
ENSCSAG00000011628	ZEB1	zinc finger E-box binding homeobox 1	108.887	0.357359	0.188973	1.89098	0.058627	0.298028	0.058627	0.298028	104.49	154.575	79.3942	97.0875
ENSCSAG00000007762			304.736	0.356651	0.158643	2.24883	0.0245233	0.180777	0.0245233	0.180777	365.714	338.055	239.001	276.175
ENSCSAG00000011420	RAD23B	RAD23 homolog B, nucleotide excision repair protein	385.082	0.356442	0.15188	2.34778	0.0188855	0.154296	0.0188855	0.154296	454.24	431.052	345.406	309.63
ENSCSAG00000001402	FUBP1	far upstream element binding protein 1	215.188	0.35642	0.168134	2.12096	0.0339255	0.223445	0.0339255	0.223445	271.383	228.721	171.066	189.583
ENSCSAG00000009098	LPP		153.664	0.356384	0.176539	2.01941	0.0434444	0.256974	0.0434444	0.256974	168.345	191.02	119.501	135.791
ENSCSAG00000016909			599.133	0.356256	0.152266	2.34035	0.0192659	0.155951	0.0192659	0.155951	788.027	590.654	497.646	520.205
ENSCSAG00000009868	RANBP17		161.94	0.355978	0.174679	2.03879	0.0414709	0.252088	0.0414709	0.252088	174.15	203.587	134.233	135.791
ENSCSAG00000012582	MED15		85.625	0.355875	0.190222	1.8726	0.061123	0.305924	0.061123	0.305924	97.2336	106.82	72.8462	65.5997
ENSCSAG00000002340	MED13L	mediator complex subunit 13L	1107.34	0.355864	0.144163	2.46864	0.0135626	0.128247	0.0135626	0.128247	1098.59	1437.68	954.367	938.731
ENSCSAG00000003355	LRBA		188.321	0.35558	0.173173	2.05375	0.0400003	0.247358	0.0400003	0.247358	210.431	228.721	138.326	175.807
ENSCSAG00000015320	CYP24A1	cytochrome P450 family 24 subfamily A member 1	184.22	0.355347	0.170322	2.08764	0.0368303	0.234819	0.0368303	0.234819	211.882	216.154	161.244	147.599
ENSCSAG00000010800	LARP1		568.115	0.355123	0.142544	2.49195	0.0127045	0.123992	0.0127045	0.123992	663.22	637.153	501.739	470.35
ENSCSAG00000006916	PXDN	peroxidasin	501.506	0.355093	0.144274	2.46183	0.013823	0.129594	0.013823	0.129594	583.401	565.52	424.8	432.302
ENSCSAG00000018060			330.769	0.354998	0.155348	2.28606	0.0222506	0.171712	0.0222506	0.171712	371.519	389.58	296.296	265.679
ENSCSAG00000006901			43.8933	0.354717	0.197025	1.80054	0.0717758	NA	0.0717758	1	50.7937	59.0654	27.0104	38.7038
ENSCSAG00000001480	DNTTIP2	deoxynucleotidyltransferase terminal interacting protein 2	201.247	0.354622	0.171714	2.06552	0.0388736	0.243522	0.0388736	0.243522	211.882	256.369	153.059	183.679
ENSCSAG00000017809	CYP3A5	cytochrome P450 family 3 subfamily A member 5	660.096	0.354171	0.145253	2.43853	0.0147472	0.133962	0.0147472	0.133962	727.075	785.445	513.198	614.669
ENSCSAG00000001868	DDX51		43.5603	0.353735	0.197066	1.79931	0.0719689	NA	0.0719689	1	60.9524	47.755	36.0139	29.5198
ENSCSAG00000001162	FOXJ3	forkhead box J3	214.78	0.353508	0.173524	2.0373	0.0416204	0.252232	0.0416204	0.252232	216.236	284.017	158.788	200.079
ENSCSAG00000013466	ANKMY2	ankyrin repeat and MYND domain containing 2	152.781	0.353158	0.176237	2.00467	0.044998	0.262149	0.044998	0.262149	166.893	189.763	121.956	132.511
ENSCSAG00000006419	MYOF		663.97	0.352579	0.141849	2.48589	0.0129227	0.12477	0.0129227	0.12477	711.111	806.809	554.122	583.837
ENSCSAG00000002376	KIRREL1	kirre like nephrin family adhesion molecule 1	512.554	0.352505	0.14952	2.35839	0.0183543	0.151589	0.0183543	0.151589	632.744	542.899	466.543	408.03
ENSCSAG00000012990	CHDH	choline dehydrogenase	111.291	0.352464	0.183934	1.91766	0.0551536	0.289932	0.0551536	0.289932	126.259	135.725	93.3086	89.8715
ENSCSAG00000005967	LARP4	La ribonucleoprotein 4	1542.35	0.352365	0.13652	2.5812	0.00984564	0.104957	0.00984564	0.104957	1821.32	1699.07	1199.92	1449.1
ENSCSAG00000011479	EFCAB11	EF-hand calcium binding domain 11	81.6919	0.352109	0.195419	1.80529	0.0710288	0.330306	0.0710288	0.330306	130.612	67.8624	64.6612	63.6317
ENSCSAG00000009603	TRAPPC9		32.1252	0.351905	0.194122	1.81326	0.0697918	NA	0.0697918	1	36.2812	46.4983	18.8254	26.8959
ENSCSAG00000007924	FAM83G		199.526	0.351748	0.175394	2.00738	0.0447091	0.260688	0.0447091	0.260688	264.127	201.074	186.617	146.287
ENSCSAG00000013644	FBH1		198.768	0.351308	0.167921	2.09329	0.0363234	0.233332	0.0363234	0.233332	227.846	232.492	172.703	162.031
ENSCSAG00000018168	BAZ1B	bromodomain adjacent to zinc finger domain 1B	898.418	0.350552	0.135863	2.58064	0.00986185	0.104957	0.00986185	0.104957	1047.8	1000.34	806.219	739.308
ENSCSAG00000007403	BICD1	BICD cargo adaptor 1	92.4695	0.350539	0.191385	1.83215	0.0669284	0.321187	0.0669284	0.321187	87.0748	133.211	76.1202	73.4716
ENSCSAG00000005948	ARL13B	ADP ribosylation factor like GTPase 13B	98.4902	0.350507	0.188708	1.85782	0.0631952	0.310827	0.0631952	0.310827	101.587	131.955	74.4832	85.9355
ENSCSAG00000007934	TSPAN15	tetraspanin 15	122.422	0.350441	0.181518	1.93191	0.0533708	0.284895	0.0533708	0.284895	146.576	140.752	97.4011	104.959
ENSCSAG00000008118	TOP3A	DNA topoisomerase III alpha	120.058	0.350413	0.183881	1.90762	0.0564399	0.292356	0.0564399	0.292356	159.637	123.158	99.0381	98.3995
ENSCSAG00000003594			27.2707	0.350389	0.190895	1.83713	0.0661907	NA	0.0661907	1	27.5737	43.9849	17.1884	20.3359
ENSCSAG00000001385	ERICH3	glutamate rich 3	7.21907	0.350046	0.137512	2.65048	0.0080378	NA	0.0080378	1	11.61	13.8238	0.818497	2.62399
ENSCSAG00000017076	APBB2		853.813	0.349975	0.151157	2.31535	0.0205936	0.162981	0.0205936	0.162981	883.81	1074.49	634.335	822.62
ENSCSAG00000014735	SLC1A4	solute carrier family 1 member 4	257.861	0.349819	0.161289	2.16988	0.0300158	0.207546	0.0300158	0.207546	312.018	282.76	213.628	223.039
ENSCSAG00000005690	SIN3B	SIN3 transcription regulator family member B	298.464	0.349784	0.158035	2.21432	0.0268068	0.191293	0.0268068	0.191293	339.592	346.852	269.285	238.127
ENSCSAG00000004152	HELZ	helicase with zinc finger	279.054	0.349757	0.169685	2.06124	0.0392799	0.24498	0.0392799	0.24498	268.481	378.27	213.628	255.839
ENSCSAG00000007165	FGD3	FYVE, RhoGEF and PH domain containing 3	82.2822	0.349213	0.191871	1.82285	0.0683259	0.323021	0.0683259	0.323021	105.941	90.4832	73.6647	59.0397
ENSCSAG00000009005	PPP6R3	protein phosphatase 6 regulatory subunit 3	873.427	0.34905	0.138678	2.51721	0.011829	0.117979	0.011829	0.117979	970.884	1021.71	698.178	802.94
ENSCSAG00000009710	NGLY1	N-glycanase 1	288.548	0.3488	0.15857	2.2007	0.0277573	0.196636	0.0277573	0.196636	351.202	312.921	248.005	242.063
ENSCSAG00000000916	EPHB2		385.2	0.348741	0.152583	2.28643	0.0222292	0.171712	0.0222292	0.171712	438.277	444.876	351.954	305.694
ENSCSAG00000009838	ST3GAL1	ST3 beta-galactoside alpha-2,3-sialyltransferase 1	104.676	0.348639	0.188044	1.85654	0.0633763	0.311269	0.0633763	0.311269	143.673	104.307	90.0347	80.6876
ENSCSAG00000008476	KDM2A	lysine demethylase 2A	562.27	0.348579	0.144782	2.4083	0.016027	0.141674	0.016027	0.141674	671.928	613.275	506.65	457.23
ENSCSAG00000010873	DAPK3	death associated protein kinase 3	121.907	0.348417	0.189601	1.84033	0.0657198	0.318198	0.0657198	0.318198	184.308	105.564	103.949	93.8075
ENSCSAG00000013230	ARID1B		331.569	0.348316	0.166064	2.0975	0.0359492	0.232021	0.0359492	0.232021	325.079	441.106	250.46	309.63
ENSCSAG00000010094	CNBD2	cyclic nucleotide binding domain containing 2	16.5273	0.348315	0.175488	1.99373	0.046182	NA	0.046182	1	23.22	23.8775	6.54797	12.4639
ENSCSAG00000011164	FZR1	fizzy and cell division cycle 20 related 1	128.417	0.348266	0.181833	1.91735	0.055194	0.289932	0.055194	0.289932	165.442	135.725	112.134	100.367
ENSCSAG00000006346	ADGRE5	adhesion G protein-coupled receptor E5	40.5526	0.348112	0.19695	1.7698	0.0767611	NA	0.0767611	1	52.2449	49.0117	29.4659	31.4878
ENSCSAG00000008501	ANKRD13D		50.2584	0.347913	0.196963	1.76778	0.0770971	NA	0.0770971	1	56.5986	66.6057	38.4694	39.3598
ENSCSAG00000009694	BMPR1A	bone morphogenetic protein receptor type 1A	2737.86	0.347818	0.197131	1.76898	0.0768977	0.345812	0.0768977	0.345812	3085.35	3712.32	1529.77	2623.99
ENSCSAG00000008557	DDIT4	DNA damage inducible transcript 4	267.513	0.347605	0.15978	2.17651	0.0295169	0.205684	0.0295169	0.205684	319.274	296.584	225.905	228.287
ENSCSAG00000010476	UBLCP1	ubiquitin like domain containing CTD phosphatase 1	156.331	0.347579	0.179109	1.94097	0.052262	0.282253	0.052262	0.282253	153.832	211.127	125.23	135.135
ENSCSAG00000001872	INTS3		151.981	0.347353	0.176274	1.97134	0.0486844	0.273354	0.0486844	0.273354	165.442	188.507	122.775	131.199
ENSCSAG00000008915	ZNF692	zinc finger protein 692	31.2262	0.34723	0.194173	1.7933	0.0729255	NA	0.0729255	1	44.9887	35.1879	23.7364	20.9919
ENSCSAG00000012281	CBFA2T2	CBFA2/RUNX1 partner transcriptional co-repressor 2	90.0516	0.347097	0.193775	1.79225	0.0730929	0.334768	0.0730929	0.334768	79.8186	135.725	81.0312	63.6317
ENSCSAG00000000023	COX3	cytochrome c oxidase subunit III	1871	0.346961	0.177556	1.99973	0.045529	0.262552	0.045529	0.262552	1744.4	3531.36	800.49	1407.77
ENSCSAG00000018301	PYGB		579.145	0.346839	0.156068	2.22318	0.0262033	0.188168	0.0262033	0.188168	721.27	608.248	563.944	423.118
ENSCSAG00000007455	JMJD1C		105.559	0.346769	0.189792	1.82685	0.0677224	0.321953	0.0677224	0.321953	107.392	143.265	71.2092	100.367
ENSCSAG00000001349	CACHD1		150.359	0.346348	0.177992	1.94688	0.0515494	0.281561	0.0515494	0.281561	156.735	193.534	131.778	119.391
ENSCSAG00000002735		carboxyl-terminal PDZ ligand of neuronal nitric oxide synthase protein	70.1242	0.346179	0.194255	1.78359	0.0744899	NA	0.0744899	1	74.0136	94.2533	59.7503	52.4797
ENSCSAG00000008376	HIPK2	homeodomain interacting protein kinase 2	112.757	0.34603	0.18381	1.88358	0.0596224	0.30125	0.0596224	0.30125	129.161	135.725	88.3977	97.7435
ENSCSAG00000017282		cytoplasmic polyadenylation element binding protein 1	65.0393	0.345636	0.194918	1.77408	0.0760492	NA	0.0760492	1	72.5624	84.1997	48.2913	55.1037
ENSCSAG00000000748	PHF13	PHD finger protein 13	82.6908	0.345321	0.192084	1.80052	0.0717793	0.331985	0.0717793	0.331985	113.197	84.1997	70.3907	62.9757
ENSCSAG00000001795	PIP5K1A		127.302	0.345125	0.182529	1.89139	0.0585724	0.298028	0.0585724	0.298028	146.576	152.062	92.4901	118.079
ENSCSAG00000014385	KIAA0586		132.545	0.345102	0.179267	1.9262	0.05408	0.286912	0.05408	0.286912	152.381	157.089	107.223	113.487
ENSCSAG00000014120	DIP2C	disco interacting protein 2 homolog C	56.2906	0.344661	0.196304	1.75836	0.078686	NA	0.078686	1	74.0136	62.8356	45.0173	43.2958
ENSCSAG00000008134	PACS1	phosphofurin acidic cluster sorting protein 1	695.255	0.34461	0.1386	2.48672	0.0128926	0.124756	0.0128926	0.124756	777.869	805.552	583.588	614.013
ENSCSAG00000014787	SNAI2	snail family transcriptional repressor 2	33.6207	0.344351	0.195145	1.76551	0.0774785	NA	0.0774785	1	37.7324	47.755	22.0994	26.8959
ENSCSAG00000015351	ADAM32	disintegrin and metalloproteinase domain-containing protein 32	7.49262	0.344344	0.135299	2.67502	0.00747253	NA	0.00747253	1	11.61	15.0805	0	3.27998
ENSCSAG00000006240	DDX23	DEAD-box helicase 23	451.142	0.344019	0.153972	2.23522	0.025403	0.184881	0.025403	0.184881	568.889	464.983	412.522	358.174
ENSCSAG00000007428	DENND5B	DENN domain containing 5B	727.174	0.343598	0.145003	2.36979	0.0177981	0.149125	0.0177981	0.149125	741.587	917.399	608.143	641.565
ENSCSAG00000002191	APLP2	amyloid beta precursor like protein 2	2720.37	0.343596	0.123904	2.77324	0.00555011	0.0714394	0.00555011	0.0714394	3159.37	3006.05	2369.55	2346.5
ENSCSAG00000001635	RSBN1	round spermatid basic protein 1	169.327	0.343497	0.176224	1.94954	0.0512315	0.280854	0.0512315	0.280854	182.857	211.127	125.23	158.095
ENSCSAG00000002293	CEP131		45.0846	0.34347	0.197042	1.74743	0.0805634	NA	0.0805634	1	55.1474	56.552	41.7433	26.8959
ENSCSAG00000013219	KIF20A	kinesin family member 20A	349.281	0.34341	0.157251	2.18417	0.02895	0.202769	0.02895	0.202769	384.581	417.228	269.285	326.03
ENSCSAG00000012317	SBNO2	strawberry notch homolog 2	184.24	0.34339	0.174523	1.96881	0.0489753	0.27431	0.0489753	0.27431	195.918	231.235	172.703	137.103
ENSCSAG00000007117	PLCB3		295.845	0.342903	0.163167	2.10282	0.0354815	0.230533	0.0354815	0.230533	374.422	306.638	273.378	228.943
ENSCSAG00000006751	WDR74	WD repeat domain 74	204.875	0.342717	0.178409	1.92271	0.0545168	0.288015	0.0545168	0.288015	293.152	184.737	177.614	163.999
ENSCSAG00000005362	PCGF6	polycomb group ring finger 6	111.224	0.342382	0.186499	1.83626	0.0663193	0.319739	0.0663193	0.319739	127.71	134.468	77.7572	104.959
ENSCSAG00000016972	RICTOR		195.69	0.342259	0.175097	1.95483	0.0506036	0.279755	0.0506036	0.279755	191.565	262.653	151.422	177.119
ENSCSAG00000008862	ATP13A3		1842.57	0.34188	0.143922	2.3755	0.0175251	0.147966	0.0175251	0.147966	1918.55	2282.19	1389.81	1779.72
ENSCSAG00000004896	TRIM47	tripartite motif containing 47	62.2464	0.341607	0.195612	1.7494	0.0802225	NA	0.0802225	1	79.8186	70.3758	54.8393	43.9518
ENSCSAG00000002765	MED24	mediator complex subunit 24	312.418	0.341496	0.164629	2.07561	0.03793	0.24009	0.03793	0.24009	409.252	310.408	287.292	242.719
ENSCSAG00000007995	OSBPL11	oxysterol binding protein like 11	262.636	0.341397	0.166785	2.04714	0.0406445	0.248679	0.0406445	0.248679	282.993	322.975	193.984	250.591
ENSCSAG00000011808	DOT1L		151.788	0.341267	0.176471	1.93551	0.052928	0.282974	0.052928	0.282974	184.308	168.399	135.052	119.391
ENSCSAG00000012265	E2F1	E2F transcription factor 1	285.083	0.341051	0.173557	1.96651	0.0492396	0.275338	0.0492396	0.275338	404.898	256.369	255.371	223.695
ENSCSAG00000014903		SLIT-ROBO Rho GTPase activating protein 2	129.814	0.340966	0.182187	1.87363	0.0609821	0.305507	0.0609821	0.305507	163.991	139.495	118.682	97.0875
ENSCSAG00000011835			59.0732	0.340867	0.19598	1.74193	0.0815203	NA	0.0815203	1	71.1111	71.6325	51.5653	41.9838
ENSCSAG00000015388	POC5		36.547	0.340827	0.195274	1.74605	0.0808019	NA	0.0808019	1	33.3787	59.0654	26.1919	27.5519
ENSCSAG00000001143	RLF	RLF zinc finger	265.944	0.340649	0.165003	2.06478	0.0389439	0.243738	0.0389439	0.243738	274.286	338.055	208.717	242.719
ENSCSAG00000009626	KHSRP	KH-type splicing regulatory protein	781.365	0.34059	0.136135	2.50222	0.0123417	0.121494	0.0123417	0.121494	879.456	896.035	667.075	682.892
ENSCSAG00000006197	TBC1D12		69.6768	0.34028	0.194092	1.75418	0.0794003	NA	0.0794003	1	84.1723	82.9429	49.9283	61.6637
ENSCSAG00000017690	ZNF316	zinc finger protein 316	144.533	0.340266	0.184294	1.84864	0.0645091	0.314753	0.0645091	0.314753	204.626	134.468	130.141	108.895
ENSCSAG00000005418	CAT	catalase	273.125	0.340181	0.16175	2.10357	0.0354163	0.230533	0.0354163	0.230533	294.603	333.028	216.902	247.967
ENSCSAG00000004097	TANGO6	transport and golgi organization 6 homolog	164.03	0.340167	0.173326	1.9639	0.0495414	0.276505	0.0495414	0.276505	190.113	189.763	142.418	133.823
ENSCSAG00000010182	SND1	staphylococcal nuclease and tudor domain containing 1	381.456	0.340115	0.150384	2.26236	0.0236749	0.178154	0.0236749	0.178154	433.923	437.336	333.128	321.438
ENSCSAG00000001082	SFPQ	splicing factor proline and glutamine rich	1002.78	0.339996	0.135745	2.50507	0.0122428	0.121395	0.0122428	0.121395	1165.35	1112.19	917.535	816.06
ENSCSAG00000001135	PABPC4	poly(A) binding protein cytoplasmic 4	806.991	0.339963	0.136949	2.48275	0.0130371	0.125267	0.0130371	0.125267	933.152	901.062	669.53	724.22
ENSCSAG00000005740	CHERP	calcium homeostasis endoplasmic reticulum protein	91.5817	0.33985	0.18879	1.80221	0.0715128	0.331604	0.0715128	0.331604	113.197	103.05	78.5757	71.5036
ENSCSAG00000002291	PATE3		59.1889	0.339834	0.196708	1.72921	0.0837708	NA	0.0837708	1	84.1723	60.3221	38.4694	53.7917
ENSCSAG00000013205			1622.11	0.339705	0.132857	2.55712	0.0105544	0.109927	0.0105544	0.109927	1718.28	1961.73	1464.29	1344.14
ENSCSAG00000008492	GRK2	G protein-coupled receptor kinase 2	212.772	0.339508	0.168635	2.01472	0.0439336	0.258563	0.0439336	0.258563	258.322	232.492	195.621	164.655
ENSCSAG00000014173	ABR		506.708	0.339313	0.14614	2.32254	0.0202041	0.160942	0.0202041	0.160942	600.816	554.21	455.903	415.902
ENSCSAG00000015086	FRMD6	FERM domain containing 6	190.445	0.339251	0.170146	1.99462	0.0460845	0.265307	0.0460845	0.265307	217.687	222.438	149.785	171.871
ENSCSAG00000008527	ATF7IP2	activating transcription factor 7 interacting protein 2	60.5241	0.339085	0.197025	1.72161	0.0851406	NA	0.0851406	1	50.7937	96.7668	49.9283	44.6078
ENSCSAG00000014374	CCDC85A		24.3465	0.339006	0.184434	1.83975	0.0658055	NA	0.0658055	1	21.7687	43.9849	10.6405	20.9919
ENSCSAG00000006757	MAFF	MAF bZIP transcription factor F	22.4528	0.338787	0.185865	1.83338	0.0667459	NA	0.0667459	1	36.2812	23.8775	17.1884	12.4639
ENSCSAG00000013744	RBM10	RNA binding motif protein 10	212.619	0.338519	0.174268	1.94426	0.0518637	0.28176	0.0518637	0.28176	281.542	211.127	199.713	158.095
ENSCSAG00000007096	KRI1		60.6428	0.338377	0.195588	1.73245	0.0831929	NA	0.0831929	1	78.3674	67.8624	49.1098	47.2318
ENSCSAG00000007809	GPC4	glypican 4	349.758	0.338223	0.162376	2.08307	0.0372445	0.236575	0.0372445	0.236575	348.299	454.929	271.741	324.062
ENSCSAG00000015436	FAM169A	family with sequence similarity 169 member A	141.006	0.33822	0.182642	1.85244	0.0639626	0.313344	0.0639626	0.313344	175.601	154.575	97.4011	136.447
ENSCSAG00000009667	FGF18	fibroblast growth factor 18	20.1163	0.338205	0.182875	1.86049	0.0628161	NA	0.0628161	1	33.3787	21.3641	13.9144	11.8079
ENSCSAG00000013669	HSPA4	heat shock protein family A (Hsp70) member 4	709.487	0.3382	0.138157	2.44834	0.0143518	0.131951	0.0143518	0.131951	814.15	798.012	596.684	629.101
ENSCSAG00000008340	TXNDC11	thioredoxin domain containing 11	142.32	0.338094	0.177319	1.90779	0.056418	0.292356	0.056418	0.292356	159.637	170.913	118.682	120.047
ENSCSAG00000008601	DUSP16	dual specificity phosphatase 16	113.765	0.337976	0.18464	1.83104	0.0670944	0.321268	0.0670944	0.321268	123.356	143.265	86.7607	101.679
ENSCSAG00000006882	REPIN1	replication initiator 1	242.451	0.337904	0.165416	2.04396	0.0409572	0.25	0.0409572	0.25	277.188	280.247	226.724	185.647
ENSCSAG00000009960	SOGA1		186.782	0.3376	0.17402	1.94174	0.0521684	0.282231	0.0521684	0.282231	235.102	197.304	174.34	140.383
ENSCSAG00000009374	CLASP2		307.532	0.337597	0.157326	2.14652	0.0318317	0.215646	0.0318317	0.215646	362.812	341.825	248.005	277.487
ENSCSAG00000013956	NUP42	nucleoporin 42	94.5466	0.337559	0.188444	1.7921	0.0731171	0.334768	0.0731171	0.334768	107.392	115.617	71.2092	83.9676
ENSCSAG00000009470	SF3A1	splicing factor 3a subunit 1	211.8	0.337426	0.174152	1.93816	0.052604	0.282253	0.052604	0.282253	203.175	286.53	191.528	165.967
ENSCSAG00000008458	RUFY1		161.904	0.337036	0.173918	1.93928	0.0524666	0.282253	0.0524666	0.282253	188.662	185.993	142.418	130.543
ENSCSAG00000015774	MTG2	mitochondrial ribosome associated GTPase 2	76.7051	0.336964	0.192221	1.75518	0.0792289	0.351576	0.0792289	0.351576	94.3311	87.9698	65.4797	59.0397
ENSCSAG00000018219	RTTN	rotatin	73.4883	0.336767	0.19426	1.73365	0.0829799	0.361487	0.0829799	0.361487	74.0136	101.794	53.2023	64.9437
ENSCSAG00000010894	STAG1	stromal antigen 1	276.928	0.33656	0.163924	2.05344	0.0400298	0.247358	0.0400298	0.247358	282.993	353.136	220.994	250.591
ENSCSAG00000008997	KDM4C	lysine demethylase 4C	142.253	0.336194	0.17865	1.88263	0.0597511	0.301273	0.0597511	0.301273	149.478	180.966	117.864	120.703
ENSCSAG00000009971	NFX1	nuclear transcription factor, X-box binding 1	95.5378	0.336187	0.187633	1.79293	0.0729836	0.334606	0.0729836	0.334606	111.746	113.104	75.3017	81.9996
ENSCSAG00000006469	FADS1		648.643	0.335843	0.141194	2.37895	0.0173619	0.147501	0.0173619	0.147501	743.039	731.406	530.386	589.741
ENSCSAG00000007755	POLA2	DNA polymerase alpha 2, accessory subunit	229.07	0.335775	0.166042	2.02355	0.0430169	0.255977	0.0430169	0.255977	284.444	242.545	202.987	186.303
ENSCSAG00000013792		RAD50 double strand break repair protein	162.65	0.335707	0.176192	1.90582	0.0566738	0.292918	0.0566738	0.292918	168.345	208.614	129.322	144.319
ENSCSAG00000002086	HIP1R	huntingtin interacting protein 1 related	373.377	0.335705	0.162421	2.06797	0.0386427	0.242298	0.0386427	0.242298	454.24	402.148	367.505	269.615
ENSCSAG00000007687	TLE1	TLE family member 1, transcriptional corepressor	255.568	0.33551	0.16199	2.07191	0.0382735	0.241086	0.0382735	0.241086	274.286	311.664	221.813	214.511
ENSCSAG00000010551		ribosomal protein lateral stalk subunit P2	1651.63	0.33548	0.196138	1.71279	0.0867505	0.368983	0.0867505	0.368983	2369.89	1621.16	1519.95	1095.51
ENSCSAG00000000219	H2BC21	histone cluster 2 H2B family member e	313.836	0.335244	0.157287	2.13188	0.0330167	0.219746	0.0330167	0.219746	341.043	377.013	254.553	282.735
ENSCSAG00000008734		discs large MAGUK scaffold protein 1	309.41	0.335233	0.163694	2.0481	0.0405504	0.248679	0.0405504	0.248679	333.787	377.013	228.361	298.478
ENSCSAG00000011514	SHQ1		110.106	0.335195	0.186387	1.79973	0.071904	0.332309	0.071904	0.332309	114.649	143.265	99.8566	82.6556
ENSCSAG00000000476			1064.45	0.335159	0.144128	2.32581	0.0200285	0.159993	0.0200285	0.159993	1369.98	1051.87	910.987	924.955
ENSCSAG00000007502			73.2002	0.335113	0.195747	1.71125	0.0870341	0.369282	0.0870341	0.369282	68.2086	108.077	48.2913	68.2236
ENSCSAG00000006517	HERC2	HECT and RLD domain containing E3 ubiquitin protein ligase 2	355.298	0.334972	0.161639	2.07342	0.0381334	0.240653	0.0381334	0.240653	420.862	393.351	347.861	259.119
ENSCSAG00000003430	SMAD1	SMAD family member 1	45.8793	0.334892	0.197163	1.69962	0.0892028	NA	0.0892028	1	52.2449	60.3221	33.5584	37.3918
ENSCSAG00000007220			289.805	0.334857	0.158237	2.11705	0.0342556	0.225354	0.0342556	0.225354	323.628	339.312	259.463	236.815
ENSCSAG00000007611	VPS18	VPS18 core subunit of CORVET and HOPS complexes	69.723	0.334788	0.194091	1.72689	0.0841876	NA	0.0841876	1	78.3674	87.9698	61.3873	51.1677
ENSCSAG00000019078	H1-5	H1.5 linker histone, cluster member	872.425	0.334749	0.153614	2.17974	0.029277	0.204639	0.029277	0.204639	1146.49	845.767	821.771	675.676
ENSCSAG00000009045	ADK	adenosine kinase	176.213	0.334464	0.174566	1.91637	0.0553183	0.289932	0.0553183	0.289932	181.406	226.208	139.144	158.095
ENSCSAG00000012193	SCHIP1	schwannomin-interacting protein 1	92.9473	0.334451	0.1884	1.77717	0.0755398	0.343326	0.0755398	0.343326	113.197	105.564	80.2127	72.8156
ENSCSAG00000006675			11.5793	0.334414	0.16137	2.09553	0.036124	NA	0.036124	1	17.415	17.594	4.09248	7.21596
ENSCSAG00000016674	UCKL1	uridine-cytidine kinase 1 like 1	109.864	0.333858	0.184152	1.81419	0.0696484	0.326218	0.0696484	0.326218	124.807	131.955	90.8531	91.8395
ENSCSAG00000007801	FRMD8		351.224	0.333785	0.163517	2.04246	0.0411056	0.250377	0.0411056	0.250377	452.789	353.136	333.947	265.023
ENSCSAG00000005843	PASK	PAS domain containing serine/threonine kinase	71.4712	0.333544	0.193385	1.72698	0.0841709	NA	0.0841709	1	88.5261	81.6862	60.5688	55.1037
ENSCSAG00000002900	CDT1	chromatin licensing and DNA replication factor 1	118.988	0.333453	0.182956	1.82428	0.0681091	0.322667	0.0681091	0.322667	150.93	126.928	99.0381	99.0555
ENSCSAG00000016314		pyrroline-5-carboxylate reductase 2	91.4004	0.333445	0.191227	1.74661	0.0807043	0.355809	0.0807043	0.355809	123.356	92.9966	84.3052	64.9437
ENSCSAG00000001203		ribosomal protein S8	4566.57	0.3331	0.121746	2.73611	0.00621705	0.0764193	0.00621705	0.0764193	5178.05	5128.64	4089.21	3870.38
ENSCSAG00000004669	KCTD15	potassium channel tetramerization domain containing 15	345.267	0.333078	0.153808	2.16641	0.0302797	0.208655	0.0302797	0.208655	413.605	374.5	300.388	292.574
ENSCSAG00000002352	RBM19		110.75	0.333066	0.184207	1.80932	0.0704014	0.328508	0.0704014	0.328508	132.064	126.928	87.5792	96.4315
ENSCSAG00000007100	ARHGEF5	Rho guanine nucleotide exchange factor 5	71.7239	0.332976	0.193942	1.71911	0.0855939	NA	0.0855939	1	97.2336	74.146	56.4763	59.0397
ENSCSAG00000002128	CCT3	chaperonin containing TCP1 subunit 3	1145.29	0.332762	0.136179	2.44389	0.0145298	0.132871	0.0145298	0.132871	1403.36	1192.62	988.744	996.459
ENSCSAG00000004824	NCAPH2	non-SMC condensin II complex subunit H2	247.022	0.3327	0.172838	1.92646	0.054047	0.286912	0.054047	0.286912	338.141	232.492	225.905	191.551
ENSCSAG00000004099	CEP112	centrosomal protein of 112 kDa	243.426	0.332589	0.166137	2.00225	0.0452573	0.262305	0.0452573	0.262305	264.127	295.327	186.617	227.631
ENSCSAG00000009799	IGF2	insulin like growth factor 2	85.7994	0.331933	0.195913	1.69426	0.090216	0.374189	0.090216	0.374189	65.3061	140.752	69.5722	67.5676
ENSCSAG00000003573	ELK3	ETS transcription factor ELK3	1480.77	0.331808	0.1389	2.38889	0.0168993	0.144651	0.0168993	0.144651	1554.29	1803.38	1172.09	1393.34
ENSCSAG00000002795	PPP1R15A		131.28	0.331458	0.184035	1.80312	0.0713688	0.331326	0.0713688	0.331326	155.283	150.805	128.504	90.5275
ENSCSAG00000015221	TENT2	terminal nucleotidyltransferase 2	259.088	0.330862	0.162527	2.03627	0.0417236	0.252232	0.0417236	0.252232	272.834	320.461	216.083	226.975
ENSCSAG00000011102	DAAM2		204.489	0.330842	0.169805	1.94971	0.0512103	0.280854	0.0512103	0.280854	236.553	233.748	191.528	156.127
ENSCSAG00000008275	RECQL4	RecQ like helicase 4	122.991	0.330742	0.188427	1.75803	0.0787416	0.350408	0.0787416	0.350408	168.345	120.644	120.319	82.6556
ENSCSAG00000017086	LIMCH1		726.394	0.33058	0.138297	2.39067	0.0168175	0.144177	0.0168175	0.144177	793.832	852.05	618.784	640.909
ENSCSAG00000008965	INSR		132.699	0.330521	0.179389	1.84389	0.0651986	0.316798	0.0651986	0.316798	161.088	147.035	110.497	112.175
ENSCSAG00000013894	SERPINF2		67.6785	0.330366	0.195554	1.6928	0.0904943	NA	0.0904943	1	97.2336	65.349	58.9318	49.1997
ENSCSAG00000015290	AP3B1	adaptor related protein complex 3 subunit beta 1	297.98	0.330078	0.162709	2.02908	0.0424506	0.254256	0.0424506	0.254256	296.054	385.81	259.463	250.591
ENSCSAG00000011790	TASP1	taspase 1	87.0305	0.330027	0.190018	1.7381	0.0821937	0.358979	0.0821937	0.358979	94.3311	110.591	73.6647	69.5356
ENSCSAG00000006254	PRPF19	pre-mRNA processing factor 19	299.195	0.32989	0.156931	2.10281	0.0354822	0.230533	0.0354822	0.230533	343.946	339.312	247.186	266.335
ENSCSAG00000016684	LZTS1	leucine zipper tumor suppressor 1	41.6526	0.329399	0.197045	1.67389	0.094153	NA	0.094153	1	53.6962	49.0117	31.1029	32.7998
ENSCSAG00000003153	DYNC2H1	dynein cytoplasmic 2 heavy chain 1	317.082	0.329159	0.156769	2.10011	0.0357191	0.231411	0.0357191	0.231411	345.397	378.27	258.645	286.014
ENSCSAG00000012396	FKBP15	FKBP prolyl isomerase family member 15	80.3827	0.329022	0.193145	1.7063	0.0879515	0.370359	0.0879515	0.370359	113.197	77.9161	68.7537	61.6637
ENSCSAG00000013950	KLHL7	kelch like family member 7	157.176	0.328832	0.175538	1.8741	0.0609172	0.305507	0.0609172	0.305507	166.893	196.047	132.596	133.167
ENSCSAG00000010912	MET		313.592	0.328831	0.155099	2.12087	0.0339328	0.223445	0.0339328	0.223445	355.556	359.419	268.467	270.927
ENSCSAG00000013633	HSPA5	heat shock protein family A (Hsp70) member 5	1214.9	0.328735	0.13718	2.39673	0.0165419	0.144177	0.0165419	0.144177	1455.6	1294.41	1129.53	980.059
ENSCSAG00000003467	ERF	ETS2 repressor factor	112.889	0.328732	0.188565	1.7456	0.0808809	0.355809	0.0808809	0.355809	162.54	103.05	94.1271	91.8395
ENSCSAG00000011441	MED12	mediator complex subunit 12	277.764	0.328674	0.158788	2.07056	0.0384003	0.241086	0.0384003	0.241086	307.664	326.745	233.272	243.375
ENSCSAG00000002309	MYH14		115.291	0.328651	0.187605	1.7542	0.079396	0.351942	0.079396	0.351942	162.54	108.077	100.675	89.8715
ENSCSAG00000013810	IRF1	interferon regulatory factor 1	49.1911	0.328643	0.197153	1.66669	0.0955765	NA	0.0955765	1	58.0499	62.8356	28.6474	47.2318
ENSCSAG00000008934	MB21D2	Mab-21 domain containing 2	285.26	0.328518	0.158386	2.07486	0.0379994	0.240252	0.0379994	0.240252	310.567	340.569	247.186	242.719
ENSCSAG00000016999	NUP155		236.712	0.328367	0.171368	1.91624	0.0553344	0.289932	0.0553344	0.289932	229.297	315.435	184.98	217.135
ENSCSAG00000003885	EMSY	EMSY transcriptional repressor, BRCA2 interacting	73.8865	0.328251	0.194025	1.69267	0.0905181	0.374933	0.0905181	0.374933	72.5624	103.05	62.2058	57.7277
ENSCSAG00000011361	PPP4R3A	protein phosphatase 4 regulatory subunit 3A	425.344	0.328131	0.153502	2.13789	0.0325257	0.218125	0.0325257	0.218125	438.277	530.332	347.043	385.726
ENSCSAG00000009273	CCND1	cyclin D1	740.836	0.32812	0.140551	2.33493	0.0195469	0.157392	0.0195469	0.157392	892.517	786.701	619.602	664.525
ENSCSAG00000010791	FBXO10	F-box protein 10	96.5065	0.328067	0.187256	1.75326	0.0795582	0.352433	0.0795582	0.352433	111.746	114.361	78.5757	81.3436
ENSCSAG00000012059	SLC6A13	solute carrier family 6 member 13	6.37808	0.328024	0.132104	2.59465	0.00946884	NA	0.00946884	1	10.1587	12.5671	0.818497	1.96799
ENSCSAG00000010230	MOK		18.7789	0.327862	0.181712	1.81172	0.0700291	NA	0.0700291	1	23.22	27.6476	13.0959	11.1519
ENSCSAG00000011985	COP1		420.388	0.327732	0.150567	2.17732	0.029457	0.205476	0.029457	0.205476	462.948	492.631	385.512	340.462
ENSCSAG00000015280	REXO4	REX4 homolog, 3'-5' exonuclease	71.6773	0.327346	0.193226	1.69593	0.0898986	NA	0.0898986	1	88.5261	81.6862	58.1133	58.3837
ENSCSAG00000002060	GON4L		173.393	0.327142	0.172431	1.89819	0.0576707	0.295812	0.0576707	0.295812	206.077	193.534	139.144	154.815
ENSCSAG00000012712	RAD54B	RAD54 homolog B	39.6622	0.326956	0.196314	1.66509	0.0958956	NA	0.0958956	1	43.5374	55.2953	23.7364	36.0798
ENSCSAG00000003143	PALLD		474.047	0.326906	0.149172	2.19176	0.0283966	0.200748	0.0283966	0.200748	507.937	569.29	384.694	434.27
ENSCSAG00000004748	GRK5	G protein-coupled receptor kinase 5	53.2072	0.326851	0.196862	1.6627	0.0963734	NA	0.0963734	1	59.5011	69.1191	47.4728	36.7358
ENSCSAG00000002109	FOXK2		185.48	0.326379	0.172718	1.89122	0.0585954	0.298028	0.0585954	0.298028	233.651	193.534	167.792	146.943
ENSCSAG00000006983	ILF3	interleukin enhancer binding factor 3	551.639	0.326217	0.144744	2.25438	0.0241724	0.179634	0.0241724	0.179634	650.159	600.708	501.739	453.95
ENSCSAG00000008533	GSG1	germ cell associated 1	5.42601	0.326148	0.120698	2.80402	0.00504704	NA	0.00504704	1	5.80499	15.0805	0.818497	0
ENSCSAG00000017106	UTRN	utrophin	699.666	0.32571	0.140298	2.32182	0.0202426	0.16095	0.0202426	0.16095	751.746	831.943	588.499	626.477
ENSCSAG00000013092	LUC7L	LUC7 like	179.446	0.325634	0.180399	1.80708	0.0707504	0.329685	0.0707504	0.329685	245.261	170.913	171.066	130.543
ENSCSAG00000012409	SLC29A1	solute carrier family 29 member 1 (Augustine blood group)	131.598	0.325543	0.179572	1.81408	0.0696649	0.326218	0.0696649	0.326218	156.735	148.292	107.223	114.143
ENSCSAG00000001598	RPS5	ribosomal protein S5	6603.39	0.325532	0.121877	2.67106	0.00756119	0.0890888	0.00756119	0.0890888	7743.86	7123.04	5741.76	5804.91
ENSCSAG00000009121	TP53BP1	tumor protein p53 binding protein 1	227.637	0.325353	0.164744	1.97555	0.0482061	0.271787	0.0482061	0.271787	249.615	271.45	187.436	202.047
ENSCSAG00000015306	SHROOM2	shroom family member 2	834.598	0.325305	0.146417	2.22189	0.0262905	0.188595	0.0262905	0.188595	825.76	1066.95	699.815	745.868
ENSCSAG00000005133	SEC14L1		600.042	0.325067	0.141643	2.29535	0.0217129	0.1689	0.0217129	0.1689	677.732	681.137	500.102	541.197
ENSCSAG00000014996	DDX27	DEAD-box helicase 27	168.508	0.324964	0.173492	1.87442	0.0608726	0.305507	0.0608726	0.305507	193.016	194.79	153.059	133.167
ENSCSAG00000002573	ACAD10	acyl-CoA dehydrogenase family member 10	53.7666	0.3249	0.196901	1.65258	0.0984158	NA	0.0984158	1	59.5011	70.3758	49.1098	36.0798
ENSCSAG00000004357	MTSS2	MTSS I-BAR domain containing 2	106.92	0.324877	0.186323	1.74568	0.0808669	0.355809	0.0808669	0.355809	139.32	110.591	92.4901	85.2796
ENSCSAG00000017040	BLM	BLM RecQ like helicase	86.3292	0.324792	0.192205	1.69057	0.0909185	0.375589	0.0909185	0.375589	110.295	94.2533	58.1133	82.6556
ENSCSAG00000014049	CSPP1		78.3391	0.324298	0.192863	1.68184	0.0925989	0.379886	0.0925989	0.379886	79.8186	105.564	59.7503	68.2236
ENSCSAG00000011439	ZNF77		43.3259	0.323883	0.197116	1.64415	0.100145	NA	0.100145	1	52.2449	54.0386	30.2844	36.7358
ENSCSAG00000011963	AQP9	aquaporin 9	13.8882	0.323815	0.16409	2.0137	0.0440412	NA	0.0440412	1	23.22	17.594	11.459	3.27998
ENSCSAG00000016217	GJA1		386.998	0.323803	0.159129	2.03496	0.041855	0.252686	0.041855	0.252686	396.191	486.347	298.751	366.702
ENSCSAG00000014105	BCR		183.803	0.323786	0.170415	1.90123	0.0572723	0.294965	0.0572723	0.294965	213.333	208.614	163.699	149.567
ENSCSAG00000008953	CHKA		361.267	0.323697	0.153405	2.11052	0.0348134	0.228143	0.0348134	0.228143	390.386	431.052	299.57	324.062
ENSCSAG00000007184			25.615	0.323537	0.190711	1.69986	0.0891573	NA	0.0891573	1	34.8299	31.4178	17.1884	19.0239
ENSCSAG00000008673	MROH1	maestro heat like repeat family member 1	148.507	0.323272	0.180172	1.79618	0.0724665	0.333581	0.0724665	0.333581	194.467	149.549	135.87	114.143
ENSCSAG00000009804	C9orf72		167.288	0.323263	0.177357	1.82293	0.0683145	0.323021	0.0683145	0.323021	184.308	202.331	121.138	161.375
ENSCSAG00000004972	EVPL		6.66188	0.322771	0.13155	2.59855	0.00936195	NA	0.00936195	1	17.415	6.28356	1.63699	1.31199
ENSCSAG00000015757	GPSM1	G protein signaling modulator 1	100.257	0.322623	0.19073	1.69438	0.0901937	0.374189	0.0901937	0.374189	137.868	98.0235	94.9456	70.1916
ENSCSAG00000001705	WDR3	WD repeat domain 3	95.0233	0.32202	0.187577	1.71809	0.0857797	0.367554	0.0857797	0.367554	110.295	111.847	78.5757	79.3756
ENSCSAG00000017226	AKAP13		634.88	0.321713	0.139512	2.30643	0.0210868	0.16554	0.0210868	0.16554	718.367	716.325	555.759	549.069
ENSCSAG00000001028	PUM1	pumilio RNA binding family member 1	856.989	0.321708	0.136497	2.35712	0.0184171	0.151741	0.0184171	0.151741	933.152	1001.6	721.096	772.108
ENSCSAG00000000788	EXOSC10		85.1694	0.321514	0.190237	1.69105	0.0908279	0.375555	0.0908279	0.375555	95.7823	104.307	67.1167	73.4716
ENSCSAG00000014090	STOML1	stomatin like 1	25.808	0.321268	0.189588	1.70213	0.0887315	NA	0.0887315	1	40.6349	26.3909	20.4624	15.7439
ENSCSAG00000002843	SPG7		60382.9	0.321168	0.185479	1.75184	0.0798021	0.35318	0.0798021	0.35318	53455.2	106946	32703.9	48426.3
ENSCSAG00000003636	KIF18B		48.8863	0.321131	0.197019	1.63164	0.102756	NA	0.102756	1	58.0499	60.3221	38.4694	38.7038
ENSCSAG00000012854		ankyrin repeat and KH domain-containing protein 1	360.964	0.321088	0.151797	2.11583	0.0343591	0.225817	0.0343591	0.225817	403.447	415.971	306.936	317.502
ENSCSAG00000009130	LTN1		270.889	0.320773	0.169307	1.89466	0.0581376	0.296478	0.0581376	0.296478	261.225	359.419	210.354	252.559
ENSCSAG00000004867	ADGRG1	adhesion G protein-coupled receptor G1	530.66	0.319936	0.14448	2.215	0.02676	0.191159	0.02676	0.191159	610.975	589.398	482.095	440.174
ENSCSAG00000006601	RHEB		258.307	0.319791	0.164944	1.93908	0.052491	0.282253	0.052491	0.282253	278.639	311.664	198.895	244.031
ENSCSAG00000001427	BCL10	BCL10 immune signaling adaptor	105.358	0.319595	0.191856	1.66525	0.0958623	0.385824	0.0958623	0.385824	110.295	138.238	64.6612	108.239
ENSCSAG00000013358	VPS16	VPS16 core subunit of CORVET and HOPS complexes	162.166	0.319429	0.174689	1.83004	0.0672436	0.321293	0.0672436	0.321293	194.467	178.453	146.511	129.231
ENSCSAG00000006559	CYFIP1	cytoplasmic FMR1 interacting protein 1	413.542	0.319406	0.150311	2.12573	0.0335259	0.221892	0.0335259	0.221892	487.619	449.903	374.872	341.774
ENSCSAG00000004306		RAP1B, member of RAS oncogene family	77.8446	0.319318	0.194525	1.64266	0.100453	0.39736	0.100453	0.39736	72.5624	111.847	71.2092	55.7597
ENSCSAG00000018245	ATP9B	ATPase phospholipid transporting 9B (putative)	164.069	0.319001	0.173556	1.8393	0.0658711	0.318664	0.0658711	0.318664	197.37	179.71	140.781	138.415
ENSCSAG00000017466	CARS2	cysteinyl-tRNA synthetase 2, mitochondrial	79.574	0.318887	0.19203	1.66188	0.0965376	0.388109	0.0965376	0.388109	84.1723	103.05	68.7537	62.3197
ENSCSAG00000016324	LIMD1	LIM domains containing 1	74.3533	0.318876	0.19387	1.64762	0.0994312	0.395061	0.0994312	0.395061	94.3311	81.6862	69.5722	51.8237
ENSCSAG00000008323	KIFC2		46.8873	0.318062	0.19715	1.61734	0.105805	NA	0.105805	1	65.3061	49.0117	41.7433	31.4878
ENSCSAG00000017895	DTNA	dystrobrevin alpha	38.2946	0.317906	0.196237	1.62176	0.104855	NA	0.104855	1	53.6962	41.4715	24.5549	33.4558
ENSCSAG00000010096	ZNF200	zinc finger protein 200	105.516	0.317712	0.186146	1.70866	0.0875132	0.369282	0.0875132	0.369282	124.807	120.644	96.5826	80.0316
ENSCSAG00000010710	MTBP		123.798	0.317711	0.182	1.74646	0.0807305	0.355809	0.0807305	0.355809	130.612	155.832	103.131	105.615
ENSCSAG00000000731	NPHP4		51.1242	0.31769	0.197113	1.61556	0.106189	NA	0.106189	1	71.1111	52.7819	45.8358	34.7678
ENSCSAG00000008218	BRAF		55.2666	0.317658	0.196446	1.61795	0.105673	NA	0.105673	1	60.9524	71.6325	42.5618	45.9198
ENSCSAG00000011806	NEURL4	neuralized E3 ubiquitin protein ligase 4	116.315	0.317222	0.184115	1.7248	0.0845642	0.365319	0.0845642	0.365319	149.478	120.644	100.675	94.4635
ENSCSAG00000011028	TBC1D2	TBC1 domain family member 2	200.231	0.316792	0.169891	1.86594	0.0620497	0.308305	0.0620497	0.308305	229.297	228.721	187.436	155.471
ENSCSAG00000002605	KPNB1	karyopherin subunit beta 1	1123.26	0.316141	0.13166	2.40142	0.0163316	0.14339	0.0163316	0.14339	1226.3	1300.7	984.652	981.371
ENSCSAG00000001806	TUFT1	tuftelin 1	223.697	0.316131	0.164895	1.91826	0.0550777	0.289923	0.0550777	0.289923	262.676	247.572	198.895	185.647
ENSCSAG00000012588	KDM5C		425.553	0.316129	0.162931	1.94125	0.0522276	0.282253	0.0522276	0.282253	548.571	420.998	415.796	316.846
ENSCSAG00000008957	UHRF2	ubiquitin like with PHD and ring finger domains 2	213.37	0.316115	0.166689	1.8976	0.0577484	0.295877	0.0577484	0.295877	249.615	237.518	193.165	173.183
ENSCSAG00000004660	ATE1		96.8097	0.315949	0.188436	1.6772	0.0935042	0.380827	0.0935042	0.380827	101.587	124.414	75.3017	85.9355
ENSCSAG00000006394	DCAF15	DDB1 and CUL4 associated factor 15	110.363	0.315908	0.186563	1.6955	0.0899802	0.374189	0.0899802	0.374189	145.125	111.847	99.8566	84.6236
ENSCSAG00000000154	LRRC8D	leucine rich repeat containing 8 VRAC subunit D	200.722	0.315833	0.172533	1.83095	0.0671074	0.321268	0.0671074	0.321268	230.748	229.978	147.329	194.831
ENSCSAG00000011518	RYBP	RING1 and YY1 binding protein	63.6664	0.315792	0.195348	1.61923	0.105397	NA	0.105397	1	79.8186	71.6325	57.2948	45.9198
ENSCSAG00000007573	SEC22A	SEC22 homolog A, vesicle trafficking protein	56.978	0.315783	0.197135	1.60388	0.10874	NA	0.10874	1	87.0748	51.5252	36.8324	52.4797
ENSCSAG00000003615	HSPA4L	heat shock protein family A (Hsp70) member 4 like	212.507	0.315719	0.169087	1.86761	0.061817	0.307698	0.061817	0.307698	233.651	252.599	163.699	200.079
ENSCSAG00000006410	AOPEP		52.4149	0.31571	0.196928	1.60564	0.108353	NA	0.108353	1	59.5011	66.6057	47.4728	36.0798
ENSCSAG00000009524	RGS7	regulator of G protein signaling 7	29.5739	0.315544	0.191851	1.64428	0.100119	NA	0.100119	1	29.0249	46.4983	17.1884	25.5839
ENSCSAG00000013591	ASPM		297.179	0.315524	0.171776	1.83671	0.066253	0.319645	0.066253	0.319645	300.408	380.783	207.08	300.446
ENSCSAG00000008021	ALDH1L1	aldehyde dehydrogenase 1 family member L1	55.9822	0.315263	0.196342	1.60801	0.107832	NA	0.107832	1	72.5624	61.5788	45.8358	43.9518
ENSCSAG00000000214	H2AC21	histone cluster 2 H2A family member b	189.822	0.315223	0.170893	1.84536	0.0649847	0.316435	0.0649847	0.316435	226.395	208.614	149.785	174.495
ENSCSAG00000007756	HPRT1		47.3979	0.315032	0.197164	1.60008	0.10958	NA	0.10958	1	50.7937	64.0923	42.5618	32.1438
ENSCSAG00000016098	ACIN1	apoptotic chromatin condensation inducer 1	260.818	0.314872	0.161411	1.95178	0.0509639	0.280854	0.0509639	0.280854	312.018	281.503	233.272	216.479
ENSCSAG00000019044	SOCS3	suppressor of cytokine signaling 3	43.1416	0.314646	0.197128	1.59774	0.110101	NA	0.110101	1	53.6962	51.5252	31.9214	35.4238
ENSCSAG00000010655	TRMT61B		83.7573	0.314591	0.191179	1.6462	0.0997234	0.395245	0.0997234	0.395245	87.0748	109.334	67.1167	71.5036
ENSCSAG00000012248	SMC4	structural maintenance of chromosomes 4	597.76	0.314	0.145235	2.16227	0.0305971	0.209994	0.0305971	0.209994	670.476	679.881	477.184	563.501
ENSCSAG00000014899	YTHDC2	YTH domain containing 2	94.8534	0.313908	0.188204	1.66902	0.0951142	0.384629	0.0951142	0.384629	101.587	119.388	81.0312	77.4076
ENSCSAG00000009445	BRD2		337.296	0.313814	0.161896	1.9385	0.0525618	0.282253	0.0525618	0.282253	332.336	434.822	271.741	310.286
ENSCSAG00000017814	TAF4B		72.0394	0.313807	0.193192	1.62569	0.104016	NA	0.104016	1	87.0748	82.9429	56.4763	61.6637
ENSCSAG00000017515	DOCK9		205.08	0.31352	0.17175	1.82571	0.0678935	0.322317	0.0678935	0.322317	223.492	246.315	153.059	197.455
ENSCSAG00000012354	USP3	ubiquitin specific peptidase 3	81.5958	0.313394	0.194341	1.61202	0.106957	0.411402	0.106957	0.411402	82.7211	110.591	52.3838	80.6876
ENSCSAG00000017583	MAD1L1	mitotic arrest deficient 1 like 1	193.497	0.31307	0.179864	1.74244	0.081432	0.356795	0.081432	0.356795	251.066	194.79	195.621	132.511
ENSCSAG00000015860	MARK1	microtubule affinity regulating kinase 1	55.7115	0.313016	0.197045	1.58785	0.112321	NA	0.112321	1	56.5986	77.9161	35.1954	53.1357
ENSCSAG00000015453	MIPOL1	mirror-image polydactyly 1	117.65	0.312844	0.18423	1.69863	0.0893898	0.373663	0.0893898	0.373663	132.064	140.752	87.5792	110.207
ENSCSAG00000013390	MACROH2A1	core histone macro-H2A.1	677.897	0.312818	0.139149	2.24843	0.0245489	0.180777	0.0245489	0.180777	738.685	787.958	599.14	585.805
ENSCSAG00000002837	ACACB		89.3359	0.31252	0.189036	1.65463	0.0979997	0.391716	0.0979997	0.391716	101.587	106.82	76.1202	72.8156
ENSCSAG00000007355	BUB1B	BUB1 mitotic checkpoint serine/threonine kinase B	251.164	0.312414	0.162034	1.92867	0.0537722	0.28652	0.0537722	0.28652	277.188	294.07	207.08	226.319
ENSCSAG00000007305	BICC1	BicC family RNA binding protein 1	4405.84	0.312379	0.129383	2.41443	0.0157599	0.139887	0.0157599	0.139887	4646.89	5246.77	3618.57	4111.13
ENSCSAG00000009348	HAUS6	HAUS augmin-like complex subunit 6	590.135	0.312254	0.152784	2.04383	0.0409705	0.25	0.0409705	0.25	621.134	715.069	447.718	576.621
ENSCSAG00000006129	BRD4	bromodomain containing 4	260.344	0.312165	0.165589	1.88567	0.0593394	0.300307	0.0593394	0.300307	258.322	334.285	231.635	217.135
ENSCSAG00000009742	PLAA		135.069	0.312008	0.183013	1.705	0.0881953	0.370541	0.0881953	0.370541	148.027	164.629	95.7641	131.855
ENSCSAG00000011723	CDC45	cell division cycle 45	127.551	0.311993	0.182771	1.70886	0.0874777	0.369282	0.0874777	0.369282	166.893	128.185	112.134	102.991
ENSCSAG00000010503	AP2A2	adaptor related protein complex 2 subunit alpha 2	680.454	0.31178	0.139331	2.23815	0.0252116	0.184147	0.0252116	0.184147	769.161	762.824	617.147	572.685
ENSCSAG00000012257	QKI		1102.6	0.311759	0.142293	2.19104	0.0284488	0.200779	0.0284488	0.200779	1140.68	1344.68	877.429	1047.63
ENSCSAG00000019087	H2BC11	histone H2B type 1-J	419.333	0.311368	0.148861	2.09219	0.0364217	0.233523	0.0364217	0.233523	455.692	491.374	370.779	359.486
ENSCSAG00000010485	BMPR2	bone morphogenetic protein receptor type 2	778.54	0.311364	0.154215	2.01903	0.043484	0.256974	0.043484	0.256974	745.941	1016.68	615.51	736.028
ENSCSAG00000014408	PAPOLG	poly(A) polymerase gamma	162.806	0.311244	0.176502	1.76375	0.0777733	0.347992	0.0777733	0.347992	174.15	199.817	124.412	152.847
ENSCSAG00000009207	PES1	pescadillo ribosomal biogenesis factor 1	164.341	0.311241	0.183778	1.69564	0.0899544	0.374189	0.0899544	0.374189	232.2	148.292	155.514	121.359
ENSCSAG00000001430	ZNHIT6	zinc finger HIT-type containing 6	71.202	0.310973	0.194406	1.5997	0.109665	NA	0.109665	1	75.4649	92.9966	50.7468	65.5997
ENSCSAG00000011043	TSC2	TSC complex subunit 2	260.001	0.310755	0.163556	1.9011	0.0572894	0.294965	0.0572894	0.294965	303.311	287.787	245.549	203.359
ENSCSAG00000008813	HSPA13	heat shock protein family A (Hsp70) member 13	283.063	0.310704	0.162418	1.91359	0.0556721	0.290445	0.0556721	0.290445	342.494	301.611	221.813	266.335
ENSCSAG00000013884		60S ribosomal protein L29-like	101.654	0.310667	0.189693	1.6402	0.100964	0.398138	0.100964	0.398138	140.771	96.7668	91.6716	77.4076
ENSCSAG00000010414	KDM4B	lysine demethylase 4B	248.842	0.310525	0.166329	1.86818	0.0617367	0.307698	0.0617367	0.307698	310.567	256.369	231.635	196.799
ENSCSAG00000002449			54.1724	0.310282	0.196641	1.57864	0.11442	NA	0.11442	1	58.0499	71.6325	41.7433	45.2638
ENSCSAG00000007806	FARSB	phenylalanyl-tRNA synthetase subunit beta	90.3128	0.309607	0.190297	1.62747	0.103638	0.404473	0.103638	0.404473	104.49	106.82	64.6612	85.2796
ENSCSAG00000016995	MCTP2	multiple C2 and transmembrane domain containing 2	65.5864	0.309413	0.194496	1.5926	0.111251	NA	0.111251	1	78.3674	76.6594	54.8393	52.4797
ENSCSAG00000017718	FAM50A	family with sequence similarity 50 member A	123.806	0.309378	0.183035	1.69198	0.0906496	0.37525	0.0906496	0.37525	143.673	142.008	117.045	92.4955
ENSCSAG00000001900	CNOT3	CCR4-NOT transcription complex subunit 3	133.431	0.309309	0.182567	1.69475	0.090123	0.374189	0.090123	0.374189	129.161	178.453	114.59	111.519
ENSCSAG00000006560	EEF1G	eukaryotic translation elongation factor 1 gamma	6627.82	0.309015	0.124399	2.48413	0.012987	0.124961	0.012987	0.124961	7250.43	7595.56	6170.65	5494.63
ENSCSAG00000009637		G protein-coupled receptor 132	33.2558	0.308888	0.195145	1.58587	0.112769	NA	0.112769	1	46.4399	36.4446	24.5549	25.5839
ENSCSAG00000012030	RASAL2		79.9849	0.308695	0.193686	1.59358	0.111031	0.417789	0.111031	0.417789	85.6236	103.05	53.2023	78.0636
ENSCSAG00000013169	CDK5RAP2	CDK5 regulatory subunit associated protein 2	169.601	0.308672	0.173061	1.78493	0.074273	0.338245	0.074273	0.338245	203.175	184.737	151.422	139.071
ENSCSAG00000017676	RNF216	ring finger protein 216	405.78	0.30858	0.149924	2.05891	0.0395029	0.24566	0.0395029	0.24566	480.363	436.079	354.409	352.27
ENSCSAG00000015737	STRN3		197.021	0.308552	0.170936	1.80545	0.0710037	0.330306	0.0710037	0.330306	206.077	243.802	157.151	181.055
ENSCSAG00000008195	ANKZF1	ankyrin repeat and zinc finger peptidyl tRNA hydrolase 1	67.0232	0.30831	0.194396	1.58814	0.112255	NA	0.112255	1	84.1723	74.146	57.2948	52.4797
ENSCSAG00000010259	RBKS	ribokinase	69.2559	0.308188	0.193717	1.59264	0.111241	NA	0.111241	1	82.7211	80.4295	58.1133	55.7597
ENSCSAG00000009061	SMARCAL1	SWI/SNF related, matrix associated, actin dependent regulator of chromatin, subfamily a like 1	78.1262	0.307938	0.194036	1.58845	0.112185	0.420572	0.112185	0.420572	76.9161	106.82	73.6647	55.1037
ENSCSAG00000014974	FERMT2		203.832	0.307866	0.169256	1.8194	0.0688499	0.323927	0.0688499	0.323927	213.333	251.342	166.973	183.679
ENSCSAG00000002870	ACSF3	acyl-CoA synthetase family member 3	90.8621	0.307835	0.190511	1.61816	0.105628	0.408499	0.105628	0.408499	121.905	90.4832	80.2127	70.8476
ENSCSAG00000009408	RPS6	ribosomal protein S6	4971.59	0.307404	0.134012	2.29397	0.0217924	0.169133	0.0217924	0.169133	6044.45	5114.81	4713.72	4013.39
ENSCSAG00000010500	VRK1	VRK serine/threonine kinase 1	252.729	0.307256	0.161289	1.90579	0.0566772	0.292918	0.0566772	0.292918	294.603	278.99	213.628	223.695
ENSCSAG00000015397	POLK	DNA polymerase kappa	94.4261	0.307122	0.190173	1.61501	0.106308	0.409847	0.106308	0.409847	97.2336	123.158	68.7537	88.5595
ENSCSAG00000017990	SLC12A9	solute carrier family 12 member 9	99.1994	0.307074	0.191701	1.60468	0.108563	0.413523	0.108563	0.413523	139.32	92.9966	94.9456	69.5356
ENSCSAG00000012442	MTERF3	mitochondrial transcription termination factor 3	45.2452	0.306916	0.197164	1.5589	0.119021	NA	0.119021	1	56.5986	52.7819	36.8324	34.7678
ENSCSAG00000004432	EBF3		147.905	0.306871	0.180166	1.70347	0.0884795	0.370766	0.0884795	0.370766	158.186	182.223	108.86	142.351
ENSCSAG00000009599	FOCAD		244.578	0.306834	0.163224	1.88083	0.0599951	0.302279	0.0599951	0.302279	278.639	276.476	225.087	198.111
ENSCSAG00000004731	CNOT1	CCR4-NOT transcription complex subunit 1	2572.07	0.306587	0.12505	2.45183	0.0142132	0.131208	0.0142132	0.131208	2786.39	2970.87	2306.52	2224.48
ENSCSAG00000010789	TADA1	transcriptional adaptor 1	102.975	0.306333	0.18811	1.62865	0.103388	0.404189	0.103388	0.404189	107.392	131.955	76.1202	96.4315
ENSCSAG00000009338	BARD1	BRCA1 associated RING domain 1	190.987	0.306196	0.175925	1.74075	0.0817269	0.357755	0.0817269	0.357755	220.59	217.411	135.052	190.895
ENSCSAG00000014750	ITGA6	integrin subunit alpha 6	193.442	0.305941	0.170177	1.79908	0.0720059	0.332357	0.0720059	0.332357	233.651	207.357	175.977	156.783
ENSCSAG00000008142	PARN	poly(A)-specific ribonuclease	164.718	0.305829	0.173304	1.76551	0.0774781	0.347049	0.0774781	0.347049	182.857	193.534	137.507	144.975
ENSCSAG00000015247	MPHOSPH10	M-phase phosphoprotein 10	81.2096	0.30577	0.191827	1.59601	0.110486	0.416255	0.110486	0.416255	94.3311	95.5101	75.3017	59.6957
ENSCSAG00000004360	GRIP1		82.2452	0.305699	0.190945	1.60189	0.10918	0.414693	0.10918	0.414693	92.8798	99.2802	64.6612	72.1596
ENSCSAG00000000768	SLC25A33	solute carrier family 25 member 33	51.7973	0.305675	0.197134	1.55333	0.120344	NA	0.120344	1	56.5986	67.8624	49.9283	32.7998
ENSCSAG00000001736	UBE2S	ubiquitin conjugating enzyme E2 S	1050.21	0.305673	0.160959	1.89955	0.0574918	0.295561	0.0574918	0.295561	1442.54	938.763	1000.2	819.34
ENSCSAG00000006500	TRMT1		116.357	0.305643	0.186357	1.64227	0.100534	0.39736	0.100534	0.39736	155.283	114.361	107.223	88.5595
ENSCSAG00000001590	TRIM28	tripartite motif containing 28	1914.88	0.305576	0.137348	2.22507	0.0260766	0.187955	0.0260766	0.187955	2308.93	1990.63	1826.88	1533.06
ENSCSAG00000011530	PUS7		316.934	0.305544	0.155167	1.96987	0.0488538	0.274079	0.0488538	0.274079	355.556	360.676	283.2	268.303
ENSCSAG00000001539	TMEM167B		170.957	0.305449	0.176045	1.7366	0.0824573	0.35967	0.0824573	0.35967	222.041	169.656	153.059	139.071
ENSCSAG00000006609	RBBP6	RB binding protein 6, ubiquitin ligase	183.26	0.305302	0.177872	1.71635	0.0860973	0.368017	0.0860973	0.368017	182.857	237.518	134.233	178.431
ENSCSAG00000016605	SNX18		98.6908	0.305261	0.187457	1.6302	0.103059	0.403137	0.103059	0.403137	124.807	104.307	84.3052	81.3436
ENSCSAG00000012145	RSRC1	arginine and serine rich coiled-coil 1	411.538	0.305151	0.156936	1.94456	0.0518285	0.28176	0.0518285	0.28176	419.41	511.481	324.943	390.318
ENSCSAG00000017156	TICRR		74.0472	0.305145	0.192745	1.5843	0.113126	0.421951	0.113126	0.421951	87.0748	86.7131	58.1133	64.2877
ENSCSAG00000007757	KIAA0319		11.4212	0.305039	0.161441	1.90619	0.0566249	NA	0.0566249	1	15.9637	17.594	4.91098	7.21596
ENSCSAG00000001097	MAP7D1		516.743	0.305038	0.15995	1.90789	0.056406	0.292356	0.056406	0.292356	670.476	500.171	500.102	396.222
ENSCSAG00000016305	ARFGAP1	ADP ribosylation factor GTPase activating protein 1	194.812	0.305013	0.177285	1.72204	0.0850628	0.366119	0.0850628	0.366119	233.651	212.384	198.076	135.135
ENSCSAG00000017428	EXOC3	exocyst complex component 3	151.449	0.304995	0.178127	1.71308	0.0866985	0.368983	0.0866985	0.368983	185.76	162.116	116.227	141.695
ENSCSAG00000001819	ZNF26	zinc finger protein 26	18.4988	0.304642	0.181164	1.68542	0.0919067	NA	0.0919067	1	21.7687	27.6476	11.459	13.1199
ENSCSAG00000015264	HCCS	holocytochrome c synthase	129.919	0.304578	0.181582	1.67782	0.0933828	0.38056	0.0933828	0.38056	140.771	158.346	99.8566	120.703
ENSCSAG00000007010	ZNF282	zinc finger protein 282	98.1313	0.304439	0.190803	1.59821	0.109996	0.415527	0.109996	0.415527	133.515	95.5101	93.3086	70.1916
ENSCSAG00000004973	STAT6	signal transducer and activator of transcription 6	122.515	0.304373	0.183424	1.66112	0.0966899	0.388246	0.0966899	0.388246	159.637	123.158	105.586	101.679
ENSCSAG00000009004	VCL	vinculin	930.898	0.304278	0.136652	2.22704	0.0259449	0.187498	0.0259449	0.187498	1088.44	1000.34	856.148	778.668
ENSCSAG00000017555	ZFAND2A		20.4833	0.303851	0.182036	1.67658	0.0936239	NA	0.0936239	1	20.3175	33.9312	17.1884	10.4959
ENSCSAG00000007763	NBAS	NBAS subunit of NRZ tethering complex	233.56	0.30364	0.166064	1.82934	0.0673491	0.321293	0.0673491	0.321293	251.066	278.99	218.539	185.647
ENSCSAG00000003688	KIAA1109	KIAA1109 ortholog	217.755	0.30346	0.168388	1.80296	0.0713939	0.331326	0.0713939	0.331326	268.481	227.465	174.34	200.735
ENSCSAG00000005926	SLC25A17		111.811	0.303277	0.184383	1.64598	0.0997673	0.395245	0.0997673	0.395245	136.417	121.901	89.2162	99.7115
ENSCSAG00000002721	ATF6	activating transcription factor 6	143.702	0.303237	0.183342	1.65395	0.0981372	0.391745	0.0981372	0.391745	158.186	173.426	98.2196	144.975
ENSCSAG00000013444		CNKSR family member 3	128.354	0.302494	0.18006	1.68095	0.092772	0.379886	0.092772	0.379886	145.125	149.549	107.223	111.519
ENSCSAG00000006579	CPEB3	cytoplasmic polyadenylation element binding protein 3	19.1976	0.30248	0.18214	1.66358	0.0961954	NA	0.0961954	1	24.6712	26.3909	10.6405	15.0879
ENSCSAG00000013875	SMAP1	small ArfGAP 1	254.044	0.302264	0.166266	1.81822	0.06903	0.32455	0.06903	0.32455	251.066	325.488	211.991	227.631
ENSCSAG00000000875	EMC1		66.1932	0.302198	0.195822	1.54646	0.121995	NA	0.121995	1	92.8798	64.0923	60.5688	47.2318
ENSCSAG00000018465			126.196	0.30219	0.192737	1.56704	0.117105	0.430902	0.117105	0.430902	104.49	191.02	82.6682	126.607
ENSCSAG00000017193	AFF3		8.47512	0.302141	0.147418	2.09074	0.0365511	NA	0.0365511	1	11.61	15.0805	3.27399	3.93598
ENSCSAG00000005911	INTS2	integrator complex subunit 2	222.943	0.302123	0.165	1.83194	0.0669608	0.321187	0.0669608	0.321187	246.712	258.883	200.532	185.647
ENSCSAG00000010518	IFFO1	intermediate filament family orphan 1	55.2029	0.302096	0.196882	1.53786	0.124083	NA	0.124083	1	75.4649	56.552	50.7468	38.0478
ENSCSAG00000006529	PAXIP1		67.3736	0.302065	0.194216	1.55673	0.119534	NA	0.119534	1	75.4649	82.9429	57.2948	53.7917
ENSCSAG00000002540	VPS11	VPS11 core subunit of CORVET and HOPS complexes	101.322	0.301964	0.186068	1.62408	0.10436	0.405506	0.10436	0.405506	116.1	118.131	85.1237	85.9355
ENSCSAG00000003586	GPATCH8	G-patch domain containing 8	329.715	0.301812	0.157497	1.9166	0.0552883	0.289932	0.0552883	0.289932	345.397	399.634	270.104	303.726
ENSCSAG00000003215	STAT3	signal transducer and activator of transcription 3	361.754	0.301702	0.15258	1.97781	0.04795	0.271464	0.04795	0.271464	404.898	410.945	301.207	329.966
ENSCSAG00000000028	MT-ND4		280.633	0.301671	0.191158	1.58648	0.112631	0.421023	0.112631	0.421023	261.225	452.416	156.333	252.559
ENSCSAG00000015937	TRAPPC13	trafficking protein particle complex 13	55.9327	0.301568	0.197003	1.53024	0.125957	NA	0.125957	1	52.2449	81.6862	39.2878	50.5117
ENSCSAG00000003793	NARS2		96.4771	0.30137	0.189481	1.59203	0.111378	0.418635	0.111378	0.418635	129.161	95.5101	75.3017	85.9355
ENSCSAG00000007708	CUL3	cullin 3	261.056	0.301318	0.164535	1.8317	0.0669963	0.321187	0.0669963	0.321187	294.603	297.841	200.532	251.247
ENSCSAG00000003199	NAF1	nuclear assembly factor 1 ribonucleoprotein	102.508	0.301317	0.187854	1.60436	0.108635	0.413565	0.108635	0.413565	114.649	123.158	74.4832	97.7435
ENSCSAG00000002949	SORBS2		193.854	0.301301	0.174488	1.72693	0.0841801	0.364956	0.0841801	0.364956	210.431	232.492	141.6	190.895
ENSCSAG00000001333			10.6005	0.301094	0.156034	1.95075	0.0510872	NA	0.0510872	1	13.0612	18.8507	3.27399	7.21596
ENSCSAG00000011274	TFEB	transcription factor EB	15.7799	0.301089	0.175317	1.72803	0.0839829	NA	0.0839829	1	21.7687	21.3641	11.459	8.52796
ENSCSAG00000018795	ARL4C	ADP ribosylation factor like GTPase 4C	38.0201	0.300921	0.196429	1.53511	0.124758	NA	0.124758	1	46.4399	46.4983	33.5584	25.5839
ENSCSAG00000013130	SYNJ2	synaptojanin 2	86.543	0.300798	0.191611	1.57228	0.115885	0.428028	0.115885	0.428028	108.844	92.9966	82.6682	61.6637
ENSCSAG00000006142	HEATR6	HEAT repeat containing 6	112.041	0.300771	0.185973	1.61771	0.105725	0.408604	0.105725	0.408604	110.295	148.292	92.4901	97.0875
ENSCSAG00000011947	MSN	moesin	933.809	0.300593	0.136402	2.20405	0.0275208	0.195383	0.0275208	0.195383	1027.48	1064.43	869.244	774.076
ENSCSAG00000019415	ENC1	ectodermal-neural cortex 1	136.708	0.300232	0.181523	1.65427	0.0980725	0.391716	0.0980725	0.391716	150.93	163.372	100.675	131.855
ENSCSAG00000016601	DHX15	DEAH-box helicase 15	712.166	0.300085	0.138682	2.16414	0.030454	0.209221	0.030454	0.209221	803.991	792.985	601.595	650.093
ENSCSAG00000014602	ASB6	ankyrin repeat and SOCS box containing 6	62.1056	0.300066	0.195302	1.53817	0.124008	NA	0.124008	1	71.1111	75.4027	54.0208	47.8877
ENSCSAG00000008469	COPS3		244.528	0.300039	0.165403	1.81491	0.0695384	0.326218	0.0695384	0.326218	306.213	248.829	204.624	218.447
ENSCSAG00000010872	EXT1		597.483	0.299936	0.15706	1.90968	0.0561746	0.291868	0.0561746	0.291868	595.011	754.027	451.81	589.085
ENSCSAG00000008366	ATPAF2		67.5371	0.29985	0.195382	1.53692	0.124314	NA	0.124314	1	95.7823	64.0923	53.2023	57.0717
ENSCSAG00000007344	FARS2	phenylalanyl-tRNA synthetase 2, mitochondrial	125.134	0.299667	0.182253	1.64555	0.0998562	0.395368	0.0998562	0.395368	136.417	150.805	116.227	97.0875
ENSCSAG00000001456	ZNF326	zinc finger protein 326	91.0983	0.299433	0.190474	1.57247	0.115841	0.428028	0.115841	0.428028	88.5261	123.158	75.3017	77.4076
ENSCSAG00000006230	AGAP1		117.387	0.299377	0.182658	1.64045	0.100912	0.398138	0.100912	0.398138	137.868	131.955	103.949	95.7755
ENSCSAG00000017468	RAB20	RAB20, member RAS oncogene family	132.677	0.299215	0.185203	1.61748	0.105775	0.408604	0.105775	0.408604	185.76	120.644	115.408	108.895
ENSCSAG00000017339	NSUN2	NOP2/Sun RNA methyltransferase 2	158.308	0.29904	0.174219	1.71755	0.0858784	0.367554	0.0858784	0.367554	179.955	180.966	139.144	133.167
ENSCSAG00000000883	TMCO4	transmembrane and coiled-coil domains 4	21.2686	0.298839	0.185871	1.61141	0.107091	NA	0.107091	1	29.0249	26.3909	13.9144	15.7439
ENSCSAG00000017961	SLC7A1	solute carrier family 7 member 1	214.376	0.298687	0.166158	1.79866	0.0720722	0.332438	0.0720722	0.332438	251.066	235.005	192.347	179.087
ENSCSAG00000004029	CEP95	centrosomal protein 95	45.8182	0.298611	0.196956	1.51575	0.129583	NA	0.129583	1	40.6349	70.3758	33.5584	38.7038
ENSCSAG00000010429		chromodomain helicase DNA binding protein 4	2698.15	0.298586	0.127276	2.34608	0.0189721	0.154818	0.0189721	0.154818	3160.82	2866.56	2296.7	2468.52
ENSCSAG00000004344	ARHGAP24	Rho GTPase activating protein 24	83.6826	0.298258	0.190598	1.56605	0.117336	0.431519	0.117336	0.431519	91.4286	103.05	72.0277	68.2236
ENSCSAG00000003535	SLC25A3	solute carrier family 25 member 3	5757.3	0.297896	0.12828	2.32228	0.020218	0.160942	0.020218	0.160942	5881.91	6977.26	5036.21	5133.83
ENSCSAG00000017034	CRTC3	CREB regulated transcription coactivator 3	202.642	0.297886	0.171175	1.74059	0.0817561	0.357755	0.0817561	0.357755	224.943	236.262	153.877	195.487
ENSCSAG00000005972	GPC1		111.199	0.297825	0.184665	1.61434	0.106454	0.410066	0.106454	0.410066	127.71	128.185	102.312	86.5915
ENSCSAG00000004716	NUP85	nucleoporin 85	228.589	0.297771	0.168198	1.77112	0.0765409	0.345275	0.0765409	0.345275	284.444	235.005	181.706	213.199
ENSCSAG00000013962	VPS8	VPS8 subunit of CORVET complex	152.964	0.297534	0.178472	1.66744	0.0954267	0.385208	0.0954267	0.385208	152.381	197.304	124.412	137.759
ENSCSAG00000006454			11.4944	0.296949	0.161581	1.85847	0.0631018	NA	0.0631018	1	14.5125	18.8507	7.36647	5.24797
ENSCSAG00000004850	CCNE1		96.5414	0.296662	0.188017	1.5797	0.114175	0.424429	0.114175	0.424429	119.002	104.307	86.7607	76.0956
ENSCSAG00000013433	GPCPD1	glycerophosphocholine phosphodiesterase 1	53.2757	0.296594	0.197017	1.50533	0.132238	NA	0.132238	1	60.9524	66.6057	34.3769	51.1677
ENSCSAG00000007597	DNA2	DNA replication helicase/nuclease 2	73.2453	0.296311	0.192812	1.53831	0.123972	0.445216	0.123972	0.445216	85.6236	85.4564	62.2058	59.6957
ENSCSAG00000011183			48.4037	0.296284	0.197137	1.50343	0.132727	NA	0.132727	1	49.3424	66.6057	37.6509	40.0158
ENSCSAG00000009904	ITSN1	intersectin 1	259.529	0.296247	0.163405	1.8133	0.0697858	0.326305	0.0697858	0.326305	272.834	314.178	210.354	240.751
ENSCSAG00000002794	ZW10		102.235	0.296234	0.187654	1.57903	0.114328	0.424429	0.114328	0.424429	114.649	121.901	75.3017	97.0875
ENSCSAG00000004819	LLGL2	LLGL scribble cell polarity complex component 2	393.025	0.296148	0.158563	1.86858	0.0616811	0.307698	0.0616811	0.307698	493.424	393.351	372.416	312.91
ENSCSAG00000000677	UBE2J2	ubiquitin conjugating enzyme E2 J2	120.308	0.295807	0.184062	1.60897	0.107622	0.412353	0.107622	0.412353	150.93	125.671	112.134	92.4955
ENSCSAG00000011364			427.753	0.295706	0.15433	1.91677	0.0552672	0.289932	0.0552672	0.289932	486.168	476.294	416.615	331.934
ENSCSAG00000012333	NMD3	NMD3 ribosome export adaptor	277.879	0.295533	0.163288	1.81016	0.0702715	0.328126	0.0702715	0.328126	301.859	326.745	215.265	267.647
ENSCSAG00000006740	KIF20B	kinesin family member 20B	253.431	0.295525	0.165077	1.79063	0.0733534	0.334951	0.0733534	0.334951	288.798	285.273	195.621	244.031
ENSCSAG00000010964	PPP4R4	protein phosphatase 4 regulatory subunit 4	110.484	0.295419	0.185186	1.59594	0.110501	0.416255	0.110501	0.416255	127.71	126.928	84.3052	102.991
ENSCSAG00000000019	COX2	cytochrome c oxidase subunit II	460.59	0.295378	0.157519	1.9673	0.0491482	0.275052	0.0491482	0.275052	374.422	1000.34	161.244	306.35
ENSCSAG00000015358	SLC30A1	solute carrier family 30 member 1	330.861	0.295074	0.159193	1.85377	0.0637722	0.312763	0.0637722	0.312763	346.848	399.634	262.737	314.222
ENSCSAG00000002772	NR1D1	nuclear receptor subfamily 1 group D member 1	22.8917	0.294967	0.187823	1.5729	0.115743	NA	0.115743	1	26.1225	32.6745	16.3699	16.3999
ENSCSAG00000007178	SUPT6H		244.053	0.294872	0.164672	1.79176	0.0731717	0.334794	0.0731717	0.334794	293.152	258.883	226.724	197.455
ENSCSAG00000003325	CNTNAP1	contactin associated protein 1	21.7779	0.294842	0.185447	1.59673	0.110327	NA	0.110327	1	27.5737	28.9044	18.8254	11.8079
ENSCSAG00000000419			60.7205	0.294807	0.195777	1.50629	0.131994	NA	0.131994	1	66.7574	76.6594	45.0173	54.4477
ENSCSAG00000009592	ASCC2	activating signal cointegrator 1 complex subunit 2	79.9041	0.29479	0.193007	1.52812	0.126482	0.44912	0.126482	0.44912	76.9161	109.334	70.3907	62.9757
ENSCSAG00000001341	DOCK7	dedicator of cytokinesis 7	259.374	0.294752	0.163603	1.80196	0.0715511	0.331604	0.0715511	0.331604	267.03	319.205	214.446	236.815
ENSCSAG00000000873	IFFO2		282.002	0.294401	0.159449	1.84711	0.0647306	0.315423	0.0647306	0.315423	307.664	328.002	259.463	232.879
ENSCSAG00000005225	ARMC6	armadillo repeat containing 6	97.0021	0.29427	0.188618	1.5621	0.118265	0.433869	0.118265	0.433869	116.1	108.077	91.6716	72.1596
ENSCSAG00000005332	UBA52	ubiquitin A-52 residue ribosomal protein fusion product 1	968.248	0.294048	0.15275	1.92546	0.0541722	0.287071	0.0541722	0.287071	1272.74	904.832	900.347	795.068
ENSCSAG00000012132	VPS13C	vacuolar protein sorting 13 homolog C	316.291	0.293881	0.158898	1.84977	0.0643473	0.31471	0.0643473	0.31471	332.336	380.783	256.19	295.854
ENSCSAG00000002197	PYCR1	pyrroline-5-carboxylate reductase 1	129.091	0.293766	0.180514	1.62833	0.103455	0.404194	0.103455	0.404194	152.381	143.265	103.949	116.767
ENSCSAG00000006985	ZNF746	zinc finger protein 746	40.0452	0.293738	0.195922	1.50321	0.132785	NA	0.132785	1	44.9887	52.7819	40.1063	22.3039
ENSCSAG00000010424			111.157	0.293714	0.191513	1.53637	0.124448	0.445216	0.124448	0.445216	156.735	101.794	111.316	74.7836
ENSCSAG00000016351	LIN9	lin-9 DREAM MuvB core complex component	58.4544	0.293695	0.196799	1.49191	0.135724	NA	0.135724	1	63.8549	75.4027	36.8324	57.7277
ENSCSAG00000003705	EXOSC9	exosome component 9	69.8946	0.293659	0.194502	1.51021	0.130991	NA	0.130991	1	81.2698	82.9429	49.1098	66.2557
ENSCSAG00000008811	RCL1	RNA 3'-terminal phosphate cyclase-like protein	98.7786	0.293599	0.187251	1.56894	0.116661	0.429964	0.116661	0.429964	117.551	110.591	77.7572	89.2155
ENSCSAG00000005008	GTF2H1	general transcription factor IIH subunit 1	186.118	0.293449	0.175112	1.67607	0.0937246	0.381043	0.0937246	0.381043	211.882	212.384	135.87	184.335
ENSCSAG00000009526	BRF1	BRF1 RNA polymerase III transcription initiation factor subunit	157.889	0.293083	0.174445	1.6811	0.0927428	0.379886	0.0927428	0.379886	175.601	183.48	139.963	132.511
ENSCSAG00000017764	ZC3H13	zinc finger CCCH-type containing 13	135.056	0.292887	0.17959	1.63148	0.102789	0.40254	0.102789	0.40254	146.576	162.116	108.86	122.671
ENSCSAG00000008164	UTP14A	UTP14A small subunit processome component	39.1602	0.292721	0.196588	1.492	0.135699	NA	0.135699	1	55.1474	40.2148	31.1029	30.1758
ENSCSAG00000001112	C1orf109	chromosome unknown C1orf109 homolog	82.4587	0.292419	0.192515	1.5212	0.128209	0.451834	0.128209	0.451834	113.197	79.1728	71.2092	66.2557
ENSCSAG00000016589	L3MBTL3	L3MBTL histone methyl-lysine binding protein 3	49.3535	0.292412	0.197163	1.48277	0.138136	NA	0.138136	1	47.8912	70.3758	35.1954	43.9518
ENSCSAG00000005508	SPAG9		639.818	0.29228	0.150528	1.94176	0.0521656	0.282231	0.0521656	0.282231	635.646	800.525	518.927	604.173
ENSCSAG00000006628		mannosidase alpha class 2B member 1	192.423	0.29214	0.170909	1.71054	0.0871663	0.369282	0.0871663	0.369282	239.456	197.304	170.247	162.687
ENSCSAG00000013292	TPR		465.127	0.292058	0.147001	1.98712	0.0469092	0.268313	0.0469092	0.268313	503.583	539.129	395.334	422.462
ENSCSAG00000001517	COL11A1	collagen type XI alpha 1 chain	4406.1	0.291811	0.126581	2.30539	0.0211448	0.165804	0.0211448	0.165804	4638.19	5177.65	4075.3	3733.28
ENSCSAG00000016452	PPP3CC		92.5486	0.291759	0.191273	1.52645	0.126897	0.449945	0.126897	0.449945	89.9773	124.414	87.5792	68.2236
ENSCSAG00000013809	MTHFD1	methylenetetrahydrofolate dehydrogenase, cyclohydrolase and formyltetrahydrofolate synthetase 1	398.225	0.291624	0.150122	1.94322	0.0519891	0.28176	0.0519891	0.28176	460.045	433.565	360.139	339.15
ENSCSAG00000005253	PAX6	paired box 6	120.611	0.291462	0.18359	1.58801	0.112283	0.420646	0.112283	0.420646	121.905	154.575	99.0381	106.927
ENSCSAG00000004100	ZFC3H1	zinc finger C3H1-type containing	156.909	0.291107	0.17786	1.63698	0.101635	0.399856	0.101635	0.399856	166.893	191.02	119.501	150.223
ENSCSAG00000016464	PTPRK	protein tyrosine phosphatase receptor type K	365.97	0.290732	0.156195	1.86157	0.0626634	0.309551	0.0626634	0.309551	372.971	449.903	304.481	336.526
ENSCSAG00000011368			289.076	0.290652	0.166357	1.74828	0.0804155	0.355077	0.0804155	0.355077	365.714	287.787	279.107	223.695
ENSCSAG00000008713			11.0162	0.290543	0.159422	1.84609	0.0648793	NA	0.0648793	1	14.5125	17.594	7.36647	4.59198
ENSCSAG00000005467		ribosomal protein L18a	1931.29	0.290402	0.135042	2.15067	0.031502	0.21405	0.031502	0.21405	2304.58	2005.71	1832.61	1582.26
ENSCSAG00000005981	PPM1D	protein phosphatase, Mg2+/Mn2+ dependent 1D	808.953	0.290182	0.136397	2.12775	0.033358	0.221586	0.033358	0.221586	870.748	934.993	717.003	713.068
ENSCSAG00000014234	CLK3		56.6207	0.290138	0.19633	1.48016	0.138831	NA	0.138831	1	69.6599	64.0923	50.7468	41.9838
ENSCSAG00000012731	GEM	GTP binding protein overexpressed in skeletal muscle	21.6806	0.290015	0.185013	1.5735	0.115603	NA	0.115603	1	24.6712	31.4178	18.8254	11.8079
ENSCSAG00000015330	CERS6	ceramide synthase 6	105.417	0.289992	0.185966	1.56005	0.118748	0.434821	0.118748	0.434821	110.295	131.955	87.5792	91.8395
ENSCSAG00000002270	RPLP0		5315.52	0.289974	0.121771	2.38137	0.0172481	0.146831	0.0172481	0.146831	5971.88	5849.99	4875.79	4564.42
ENSCSAG00000013461	TRMT6	tRNA methyltransferase 6	73.0866	0.289904	0.193171	1.50219	0.133049	0.459343	0.133049	0.459343	91.4286	79.1728	58.1133	63.6317
ENSCSAG00000005980	RIOX2	ribosomal oxygenase 2	65.6146	0.289886	0.194882	1.48844	0.136634	NA	0.136634	1	68.2086	85.4564	55.6578	53.1357
ENSCSAG00000016067	CEP85L	centrosomal protein 85 like	91.9918	0.28977	0.190696	1.51966	0.128595	0.45198	0.128595	0.45198	101.587	111.847	64.6612	89.8715
ENSCSAG00000012001	TRMT2A	tRNA methyltransferase 2 homolog A	44.907	0.289573	0.197161	1.47085	0.141331	NA	0.141331	1	52.2449	55.2953	39.2878	32.7998
ENSCSAG00000014019	IGF2BP2	insulin like growth factor 2 mRNA binding protein 2	330.477	0.289549	0.153831	1.88289	0.0597151	0.301273	0.0597151	0.301273	370.068	371.987	293.84	286.014
ENSCSAG00000004415	ETV2	ETS variant transcription factor 2	54.2922	0.28949	0.196554	1.47503	0.140204	NA	0.140204	1	68.2086	60.3221	46.6543	41.9838
ENSCSAG00000015224	QRICH1	glutamine rich 1	115.565	0.289214	0.183051	1.58099	0.113881	0.423838	0.113881	0.423838	126.259	138.238	100.675	97.0875
ENSCSAG00000008770	ALG13	ALG13 UDP-N-acetylglucosaminyltransferase subunit	59.0915	0.289133	0.195874	1.47753	0.139533	NA	0.139533	1	74.0136	65.349	45.8358	51.1677
ENSCSAG00000016497	SUPT16H	SPT16 homolog, facilitates chromatin remodeling subunit	532.647	0.289077	0.143966	2.00845	0.0445955	0.260472	0.0445955	0.260472	599.365	591.911	488.643	450.67
ENSCSAG00000006081			227.516	0.288864	0.164548	1.75642	0.0790165	0.351173	0.0790165	0.351173	256.871	256.369	207.898	188.927
ENSCSAG00000008155	ELAVL1		433.81	0.28863	0.149044	1.93692	0.0527557	0.282496	0.0527557	0.282496	484.717	487.604	360.139	402.782
ENSCSAG00000001195	SLC6A9	solute carrier family 6 member 9	97.2745	0.288592	0.189982	1.52114	0.128225	0.451834	0.128225	0.451834	133.515	91.7399	85.1237	78.7196
ENSCSAG00000011468	EIF4A1	eukaryotic translation initiation factor 4A1	5345.95	0.288352	0.121855	2.36641	0.0179617	0.149229	0.0179617	0.149229	6102.49	5780.87	4861.87	4638.55
ENSCSAG00000014544	ZNF608	zinc finger protein 608	74.1276	0.287907	0.195149	1.47481	0.140265	0.472662	0.140265	0.472662	68.2086	105.564	53.2023	69.5356
ENSCSAG00000004400	MSRB3		91.4307	0.287724	0.188739	1.52564	0.127099	0.450351	0.127099	0.450351	100.136	110.591	80.2127	74.7836
ENSCSAG00000014636	SRFBP1	serum response factor binding protein 1	74.3307	0.287542	0.194682	1.47681	0.139728	0.472594	0.139728	0.472594	68.2086	105.564	57.2948	66.2557
ENSCSAG00000016371	SLC38A9	solute carrier family 38 member 9	36.3426	0.28744	0.194851	1.47421	0.140426	NA	0.140426	1	40.6349	49.0117	19.6439	36.0798
ENSCSAG00000011943	MBNL1	muscleblind like splicing regulator 1	471.655	0.287329	0.161895	1.77474	0.0759414	0.344234	0.0759414	0.344234	473.107	589.398	347.861	476.254
ENSCSAG00000006301	CBLB	Cbl proto-oncogene B	40.797	0.286993	0.196252	1.46169	0.143825	NA	0.143825	1	36.2812	62.8356	28.6474	35.4238
ENSCSAG00000011966	LMF1		63.241	0.286658	0.195935	1.46487	0.142958	NA	0.142958	1	66.7574	81.6862	60.5688	43.9518
ENSCSAG00000011484	MAPK8IP3	mitogen-activated protein kinase 8 interacting protein 3	94.0693	0.286655	0.189011	1.51854	0.128878	0.452169	0.128878	0.452169	119.002	98.0235	85.1237	74.1276
ENSCSAG00000011265	XRN1	5'-3' exoribonuclease 1	205.346	0.286456	0.173693	1.64925	0.0990966	0.394191	0.0990966	0.394191	201.723	263.909	159.607	196.143
ENSCSAG00000005707		mediator complex subunit 26	50.1025	0.286187	0.197074	1.45503	0.145661	NA	0.145661	1	63.8549	55.2953	45.8358	35.4238
ENSCSAG00000011555	LMNB2	lamin B2	466.648	0.285833	0.167366	1.7087	0.087506	0.369282	0.087506	0.369282	612.426	441.106	473.91	339.15
ENSCSAG00000014739			35.8331	0.285706	0.196116	1.45833	0.14475	NA	0.14475	1	40.6349	46.4983	28.6474	27.5519
ENSCSAG00000005591	TRIM25	tripartite motif containing 25	349.61	0.285643	0.153425	1.86243	0.0625429	0.309551	0.0625429	0.309551	388.934	394.607	321.669	293.23
ENSCSAG00000002945	ZC3H12C	zinc finger CCCH-type containing 12C	65.484	0.285446	0.195992	1.45605	0.145379	NA	0.145379	1	60.9524	92.9966	48.2913	59.6957
ENSCSAG00000012425	PRPF4		135.753	0.285023	0.179572	1.58837	0.112202	0.420572	0.112202	0.420572	148.027	160.859	125.23	108.895
ENSCSAG00000017465	ING1	inhibitor of growth family member 1	23.4919	0.285002	0.185964	1.54098	0.123322	NA	0.123322	1	39.1837	21.3641	19.6439	13.7759
ENSCSAG00000004469	DDX19B	ATP-dependent RNA helicase DDX19B	60.4541	0.284776	0.195701	1.45731	0.145032	NA	0.145032	1	74.0136	67.8624	54.0208	45.9198
ENSCSAG00000016707	INTS10	integrator complex subunit 10	200.81	0.284717	0.167922	1.69632	0.0898251	0.374189	0.0898251	0.374189	233.651	219.924	168.61	181.055
ENSCSAG00000014606	XPO1	exportin 1	827.565	0.284657	0.152664	1.8646	0.0622368	0.308785	0.0622368	0.308785	840.272	1014.17	625.332	830.492
ENSCSAG00000016816	BIN1		708.255	0.284646	0.155614	1.82974	0.0672881	0.321293	0.0672881	0.321293	892.517	696.218	703.089	541.197
ENSCSAG00000014147			13.7271	0.284508	0.16808	1.70132	0.0888827	NA	0.0888827	1	13.0612	25.1342	8.18497	8.52796
ENSCSAG00000001084	KIAA0319L	KIAA0319 like	171.452	0.28442	0.17394	1.63558	0.101928	0.400317	0.101928	0.400317	179.955	208.614	139.144	158.095
ENSCSAG00000019093	H2AC6	histone H2A type 1-C	578.874	0.284416	0.148666	1.9137	0.0556581	0.290445	0.0556581	0.290445	696.599	598.195	551.667	469.038
ENSCSAG00000008611	KANK1	KN motif and ankyrin repeat domains 1	224.284	0.284395	0.16459	1.72853	0.083893	0.364437	0.083893	0.364437	243.81	261.396	193.165	198.767
ENSCSAG00000015843	BAZ2B	bromodomain adjacent to zinc finger domain 2B	250.682	0.284341	0.163063	1.74419	0.0811261	0.35614	0.0811261	0.35614	261.225	302.867	213.628	225.007
ENSCSAG00000016893	CTNNB1	catenin beta 1	1750.37	0.284104	0.126617	2.24397	0.0248341	0.18217	0.0248341	0.18217	1978.05	1911.46	1559.24	1552.74
ENSCSAG00000012534	HUWE1	HECT, UBA and WWE domain containing E3 ubiquitin protein ligase 1	1447.94	0.283639	0.130522	2.17323	0.0297631	0.206976	0.0297631	0.206976	1548.48	1671.43	1244.12	1327.74
ENSCSAG00000003911	CTCF	CCCTC-binding factor	247.859	0.283583	0.165808	1.71054	0.0871658	0.369282	0.0871658	0.369282	258.322	300.354	197.258	235.503
ENSCSAG00000003052	TDG	thymine DNA glycosylase	158.297	0.283545	0.17688	1.60353	0.108817	0.413566	0.108817	0.413566	181.406	178.453	121.138	152.191
ENSCSAG00000016522			169.719	0.283524	0.177592	1.59656	0.110364	0.416255	0.110364	0.416255	166.893	218.668	132.596	160.719
ENSCSAG00000002999	CHST11	carbohydrate sulfotransferase 11	79.8747	0.283438	0.191256	1.48333	0.137987	0.469734	0.137987	0.469734	94.3311	90.4832	67.1167	67.5676
ENSCSAG00000002061	RILPL1		70.7166	0.283257	0.193429	1.46597	0.142657	NA	0.142657	1	82.7211	81.6862	61.3873	57.0717
ENSCSAG00000009546	VPS52	VPS52 subunit of GARP complex	135.498	0.283181	0.178551	1.58697	0.11252	0.420839	0.11252	0.420839	150.93	157.089	117.864	116.111
ENSCSAG00000012208			41.2131	0.282961	0.195244	1.44863	0.147442	NA	0.147442	1	52.2449	49.0117	19.6439	43.9518
ENSCSAG00000001375	SRSF11	serine and arginine rich splicing factor 11	392.49	0.282906	0.159927	1.76904	0.0768867	0.345812	0.0768867	0.345812	377.324	503.941	323.306	365.39
ENSCSAG00000003582	LARP1B		60.0759	0.282651	0.196457	1.44017	0.149819	NA	0.149819	1	59.5011	81.6862	56.4763	42.6398
ENSCSAG00000013090	FRMD4A		196.693	0.282435	0.16933	1.66845	0.0952258	0.384852	0.0952258	0.384852	208.98	235.005	163.699	179.087
ENSCSAG00000015119	MXD1	MAX dimerization protein 1	57.7998	0.282282	0.196101	1.44119	0.14953	NA	0.14953	1	65.3061	70.3758	51.5653	43.9518
ENSCSAG00000007681	NYAP2		10.3632	0.282249	0.147601	1.94811	0.0514022	NA	0.0514022	1	14.5125	17.594	0.818497	8.52796
ENSCSAG00000015800	NRG1		48.6778	0.282199	0.197107	1.43215	0.152101	NA	0.152101	1	42.0862	74.146	41.7433	36.7358
ENSCSAG00000015295	WWC3	protein WWC3	377.891	0.282064	0.15294	1.84492	0.0650495	0.316525	0.0650495	0.316525	454.24	392.094	330.673	334.558
ENSCSAG00000009634	STK10		103.305	0.282002	0.186665	1.51197	0.130542	0.45565	0.130542	0.45565	129.161	108.077	83.4867	92.4955
ENSCSAG00000011578	ORC5	origin recognition complex subunit 5	48.938	0.281907	0.197088	1.43161	0.152256	NA	0.152256	1	62.4036	54.0386	36.0139	43.2958
ENSCSAG00000018765	MARS2		31.864	0.28156	0.194672	1.44915	0.147296	NA	0.147296	1	39.1837	38.958	27.0104	22.3039
ENSCSAG00000001351	JAK1	Janus kinase 1	376.858	0.281284	0.150562	1.86873	0.06166	0.307698	0.06166	0.307698	416.508	426.025	332.31	332.59
ENSCSAG00000015957			288.323	0.280845	0.164548	1.7069	0.0878413	0.370138	0.0878413	0.370138	303.311	345.596	220.994	283.391
ENSCSAG00000003858	SLC6A15	solute carrier family 6 member 15	102.265	0.280753	0.187245	1.49978	0.133671	0.460558	0.133671	0.460558	110.295	124.414	78.5757	95.7755
ENSCSAG00000011489		serine/threonine-protein phosphatase 4 regulatory subunit 2	527.693	0.280647	0.147978	1.89676	0.0578599	0.296009	0.0578599	0.296009	581.95	596.938	424.8	507.085
ENSCSAG00000017292			166.098	0.280535	0.172777	1.62452	0.104264	0.405506	0.104264	0.405506	185.76	189.763	143.237	145.631
ENSCSAG00000000769	TMEM201	transmembrane protein 201	122.934	0.280502	0.181156	1.54938	0.121291	0.439429	0.121291	0.439429	137.868	142.008	105.586	106.271
ENSCSAG00000011646	EEF1AKNMT	eEF1A lysine and N-terminal methyltransferase	73.9076	0.280311	0.194677	1.44205	0.149288	0.486361	0.149288	0.486361	82.7211	89.2265	74.4832	49.1997
ENSCSAG00000010697	EPS8L2		265.517	0.279962	0.171756	1.6312	0.102848	0.402541	0.102848	0.402541	327.982	271.45	271.741	190.895
ENSCSAG00000014231	RBM45	RNA binding motif protein 45	83.0667	0.279742	0.191608	1.46036	0.144192	0.479374	0.144192	0.479374	92.8798	99.2802	61.3873	78.7196
ENSCSAG00000001862	CHTOP	chromatin target of PRMT1	202.697	0.279615	0.167761	1.6676	0.0953945	0.385208	0.0953945	0.385208	239.456	217.411	173.521	180.399
ENSCSAG00000010958	TRPS1	transcriptional repressor GATA binding 1	242.481	0.279519	0.177186	1.57753	0.114673	0.424932	0.114673	0.424932	206.077	343.082	209.535	211.231
ENSCSAG00000005208	ITGA3	integrin subunit alpha 3	407.349	0.279426	0.155787	1.7944	0.0727498	0.333983	0.0727498	0.333983	483.265	428.539	396.152	321.438
ENSCSAG00000015073	ANK1	ankyrin 1	56.6855	0.279309	0.197123	1.42043	0.155484	NA	0.155484	1	87.0748	47.755	49.9283	41.9838
ENSCSAG00000009655	RBMS3		58.72	0.279302	0.196344	1.4226	0.154852	NA	0.154852	1	65.3061	72.8893	40.9248	55.7597
ENSCSAG00000019646	NUP62	nucleoporin 62	159.966	0.279237	0.177413	1.57537	0.115171	0.426083	0.115171	0.426083	204.626	158.346	145.692	131.199
ENSCSAG00000016516	NCAPG		260.337	0.279181	0.161164	1.73279	0.0831325	0.361921	0.0831325	0.361921	291.701	292.814	216.083	240.751
ENSCSAG00000012037	TTLL5	tubulin tyrosine ligase like 5	103.15	0.279114	0.186075	1.50078	0.133413	0.460133	0.133413	0.460133	110.295	125.671	86.7607	89.8715
ENSCSAG00000003193	TMA16	translation machinery associated 16 homolog	44.9927	0.27905	0.197144	1.41578	0.156841	NA	0.156841	1	52.2449	55.2953	31.1029	41.3278
ENSCSAG00000008410	LUC7L2	putative RNA-binding protein Luc7-like 2	282.877	0.278989	0.157892	1.76759	0.07713	0.346399	0.07713	0.346399	312.018	321.718	250.46	247.311
ENSCSAG00000013535	SPESP1	sperm equatorial segment protein 1	22.7959	0.278985	0.186133	1.4986	0.133977	NA	0.133977	1	23.22	35.1879	13.0959	19.6799
ENSCSAG00000002563	COPA	COPI coat complex subunit alpha	545.802	0.278958	0.145804	1.91347	0.0556878	0.290445	0.0556878	0.290445	565.986	650.976	468.999	497.245
ENSCSAG00000011124	LCLAT1	lysocardiolipin acyltransferase 1	270.52	0.278956	0.168375	1.65677	0.0975663	0.390784	0.0975663	0.390784	261.225	348.109	213.628	259.119
ENSCSAG00000002787	ZNF276	zinc finger protein 276	34.0642	0.278943	0.194677	1.43674	0.150792	NA	0.150792	1	52.2449	31.4178	27.0104	25.5839
ENSCSAG00000006499	TMLHE	trimethyllysine hydroxylase, epsilon	95.9398	0.278745	0.188926	1.47572	0.14002	0.472662	0.14002	0.472662	97.2336	123.158	76.1202	87.2475
ENSCSAG00000003495	ARHGEF1	Rho guanine nucleotide exchange factor 1	91.9359	0.278675	0.189936	1.46923	0.14177	0.474783	0.14177	0.474783	116.1	95.5101	85.9422	70.1916
ENSCSAG00000007677	INTS13	integrator complex subunit 13	207.808	0.278622	0.166728	1.67181	0.0945609	0.383073	0.0945609	0.383073	224.943	242.545	183.343	180.399
ENSCSAG00000012185	ABHD6	abhydrolase domain containing 6, acylglycerol lipase	17.8378	0.278319	0.17958	1.55233	0.120583	NA	0.120583	1	23.22	23.8775	9.82196	14.4319
ENSCSAG00000005061	GMIP		21.6778	0.278171	0.18654	1.4946	0.13502	NA	0.13502	1	29.0249	26.3909	15.5514	15.7439
ENSCSAG00000017596			8.15293	0.278071	0.145374	1.95207	0.0509295	NA	0.0509295	1	10.1587	15.0805	4.09248	3.27998
ENSCSAG00000009119	MAP2K4		295.752	0.277964	0.158421	1.75499	0.0792619	0.351576	0.0792619	0.351576	310.567	351.879	252.916	267.647
ENSCSAG00000009948	BAG1		82.1014	0.277809	0.192589	1.44444	0.148614	0.484862	0.148614	0.484862	92.8798	96.7668	81.0312	57.7277
ENSCSAG00000002727	TRPM4		73.8253	0.277795	0.194209	1.43286	0.151899	0.490884	0.151899	0.490884	100.136	71.6325	67.1167	56.4157
ENSCSAG00000003344		40S ribosomal protein S3a	656.204	0.277765	0.142332	1.95176	0.050967	0.280854	0.050967	0.280854	677.732	782.931	580.314	583.837
ENSCSAG00000007701			98.1408	0.277755	0.190633	1.45685	0.145158	0.480538	0.145158	0.480538	104.49	121.901	67.1167	99.0555
ENSCSAG00000000427	RPS27AP5		221.699	0.277751	0.165074	1.68319	0.0923378	0.379247	0.0923378	0.379247	238.005	260.139	193.165	195.487
ENSCSAG00000016083			128.431	0.277629	0.180288	1.54116	0.123278	0.444505	0.123278	0.444505	152.381	139.495	112.953	108.895
ENSCSAG00000009439	WNT7A	Wnt family member 7A	72.4763	0.277487	0.194542	1.42896	0.153016	0.492253	0.153016	0.492253	95.7823	72.8893	68.7537	52.4797
ENSCSAG00000017503	SPIRE1		654.999	0.27732	0.13945	1.98898	0.0467033	0.267739	0.0467033	0.267739	735.782	721.352	567.218	595.645
ENSCSAG00000002784	CDC6	cell division cycle 6	196.668	0.277078	0.169156	1.63858	0.1013	0.399	0.1013	0.399	222.041	221.181	160.425	183.023
ENSCSAG00000014423	SOX13	SRY-box transcription factor 13	14.3309	0.277074	0.171902	1.62022	0.105185	NA	0.105185	1	18.8662	20.1074	9.82196	8.52796
ENSCSAG00000008453	ITSN2	intersectin 2	119.369	0.276744	0.183147	1.51258	0.130385	0.45565	0.130385	0.45565	143.673	128.185	110.497	95.1195
ENSCSAG00000003863	METTL25		19.9392	0.276717	0.182706	1.51549	0.129647	NA	0.129647	1	20.3175	31.4178	12.2775	15.7439
ENSCSAG00000012007	YWHAZ	tyrosine 3-monooxygenase/tryptophan 5-monooxygenase activation protein zeta	962.708	0.276524	0.142679	1.93823	0.0525949	0.282253	0.0525949	0.282253	950.567	1191.36	879.066	829.836
ENSCSAG00000005044	ZNF14		14.801	0.276515	0.172734	1.60863	0.107698	NA	0.107698	1	17.415	22.6208	10.6405	8.52796
ENSCSAG00000013821	ARIH1		181.392	0.276434	0.178343	1.55036	0.121056	0.439278	0.121056	0.439278	165.442	245.059	166.155	148.911
ENSCSAG00000007991	KAT5		154.247	0.27629	0.175589	1.57468	0.11533	0.426438	0.11533	0.426438	184.308	164.629	137.507	130.543
ENSCSAG00000007021	ARHGAP31	Rho GTPase activating protein 31	441.767	0.276232	0.147481	1.87354	0.0609939	0.305507	0.0609939	0.305507	502.132	482.577	401.882	380.478
ENSCSAG00000006926	DUSP9	dual specificity phosphatase 9	60.8516	0.276224	0.195949	1.41149	0.1581	NA	0.1581	1	66.7574	75.4027	57.2948	43.9518
ENSCSAG00000008097	PLEKHA5	pleckstrin homology domain containing A5	444.621	0.276107	0.155753	1.77289	0.0762474	0.344705	0.0762474	0.344705	428.118	565.52	387.967	396.878
ENSCSAG00000008121	SF3B2	splicing factor 3b subunit 2	752.816	0.276061	0.155837	1.77199	0.0763956	0.344918	0.0763956	0.344918	952.018	731.406	750.562	577.277
ENSCSAG00000010121	SPDL1	spindle apparatus coiled-coil protein 1	205.95	0.275878	0.166918	1.6536	0.0982093	0.391803	0.0982093	0.391803	227.846	235.005	185.799	175.151
ENSCSAG00000005390	TENT4B		67.2674	0.275568	0.196818	1.40029	0.161427	NA	0.161427	1	89.9773	69.1191	38.4694	71.5036
ENSCSAG00000008881	OPA1		422.847	0.27554	0.150753	1.82807	0.0675385	0.321516	0.0675385	0.321516	435.374	507.711	372.416	375.886
ENSCSAG00000011387	CCDC88C	coiled-coil domain containing 88C	82.3623	0.275289	0.191778	1.43694	0.150736	0.488281	0.150736	0.488281	107.392	82.9429	66.2982	72.8156
ENSCSAG00000009859	PPP1R13B	protein phosphatase 1 regulatory subunit 13B	80.7358	0.275094	0.191541	1.43701	0.150716	0.488281	0.150716	0.488281	84.1723	101.794	68.7537	68.2236
ENSCSAG00000005127	PRMT3	protein arginine methyltransferase 3	171.494	0.275087	0.173851	1.58278	0.113472	0.422776	0.113472	0.422776	190.113	197.304	135.87	162.687
ENSCSAG00000008197	ZNF7	zinc finger protein 7	128.279	0.275054	0.179991	1.52916	0.126225	0.448552	0.126225	0.448552	146.576	144.522	110.497	111.519
ENSCSAG00000016771	SLC20A1	solute carrier family 20 member 1	264.361	0.274941	0.161212	1.70603	0.0880024	0.370359	0.0880024	0.370359	306.213	286.53	219.357	245.343
ENSCSAG00000015301	MIS18BP1		177.915	0.274708	0.171612	1.60137	0.109296	0.414693	0.109296	0.414693	198.821	202.331	146.511	163.999
ENSCSAG00000005147	SHOC2	SHOC2 leucine rich repeat scaffold protein	386.669	0.27469	0.160774	1.70857	0.08753	0.369282	0.08753	0.369282	375.873	490.117	309.392	371.294
ENSCSAG00000017549	VAPA	VAMP associated protein A	672.79	0.274577	0.15589	1.76132	0.0781841	0.348837	0.0781841	0.348837	661.769	841.997	515.653	671.74
ENSCSAG00000006683			58.4644	0.274337	0.197164	1.39549	0.16287	NA	0.16287	1	78.3674	60.3221	63.0243	32.1438
ENSCSAG00000003178	USP10		253.432	0.274249	0.161933	1.69419	0.0902287	0.374189	0.0902287	0.374189	268.481	299.097	228.361	217.791
ENSCSAG00000008271	KDM7A	lysine demethylase 7A	40.4155	0.274207	0.196811	1.39385	0.163363	NA	0.163363	1	49.3424	47.755	27.8289	36.7358
ENSCSAG00000002928	NOP53	NOP53 ribosome biogenesis factor	578.798	0.274164	0.150045	1.82777	0.0675835	0.321516	0.0675835	0.321516	690.794	599.451	563.126	461.822
ENSCSAG00000017424	CEP72		74.5908	0.274011	0.193776	1.41628	0.156694	0.495951	0.156694	0.495951	100.136	72.8893	66.2982	59.0397
ENSCSAG00000010465	PIK3R4	phosphoinositide-3-kinase regulatory subunit 4	179.386	0.27393	0.177704	1.54179	0.123124	0.444185	0.123124	0.444185	211.882	194.79	128.504	182.367
ENSCSAG00000000714	PANK4		32.8161	0.273852	0.195054	1.40682	0.15948	NA	0.15948	1	43.5374	36.4446	27.0104	24.2719
ENSCSAG00000015294	INHBA	inhibin subunit beta A	9.83271	0.273829	0.153465	1.80791	0.0706204	NA	0.0706204	1	10.1587	18.8507	5.72948	4.59198
ENSCSAG00000001275	ORC1	origin recognition complex subunit 1	64.422	0.273404	0.195086	1.40253	0.160756	NA	0.160756	1	79.8186	70.3758	49.1098	58.3837
ENSCSAG00000019253		60S ribosomal protein L27a-like	64.2189	0.273375	0.19563	1.39805	0.162097	NA	0.162097	1	79.8186	70.3758	45.0173	61.6637
ENSCSAG00000015273	MID1	midline 1	203.522	0.273345	0.174393	1.56755	0.116986	0.430827	0.116986	0.430827	188.662	270.193	173.521	181.711
ENSCSAG00000014600	NTMT1	N-terminal Xaa-Pro-Lys N-methyltransferase 1	83.1524	0.273286	0.193141	1.41742	0.156359	0.495889	0.156359	0.495889	113.197	79.1728	78.5757	61.6637
ENSCSAG00000014887	VCAN	versican	6956.25	0.272912	0.129754	2.10332	0.0354378	0.230533	0.0354378	0.230533	7063.22	8344.56	5907.09	6510.11
ENSCSAG00000009758	AP1B1	adaptor related protein complex 1 subunit beta 1	327.118	0.272777	0.154895	1.76173	0.0781146	0.348755	0.0781146	0.348755	375.873	354.393	298.751	279.455
ENSCSAG00000015336	STK39	serine/threonine kinase 39	232.081	0.272599	0.16825	1.62071	0.105081	0.407306	0.105081	0.407306	229.297	291.557	215.265	192.207
ENSCSAG00000009686	MTAP		99.2053	0.272394	0.189082	1.44252	0.149155	0.486161	0.149155	0.486161	132.064	95.5101	89.2162	80.0316
ENSCSAG00000017881			15.8321	0.272282	0.174597	1.56307	0.118036	NA	0.118036	1	15.9637	26.3909	9.82196	11.1519
ENSCSAG00000016842	IWS1		326.252	0.27228	0.155731	1.74906	0.0802806	0.354711	0.0802806	0.354711	359.909	368.216	305.299	271.583
ENSCSAG00000010017	UBAP1	ubiquitin associated protein 1	283.03	0.272187	0.159504	1.70709	0.0878052	0.370138	0.0878052	0.370138	303.311	329.258	262.737	236.815
ENSCSAG00000004676	TEAD1		275.943	0.272125	0.169329	1.60703	0.108049	0.412722	0.108049	0.412722	268.481	351.879	211.172	272.239
ENSCSAG00000004579	GRAMD1A		461.671	0.272119	0.156507	1.73941	0.0819633	0.358432	0.0819633	0.358432	577.596	453.673	442.807	372.606
ENSCSAG00000006395	XPO6		540.126	0.272026	0.144194	1.88701	0.059159	0.299693	0.059159	0.299693	624.036	576.83	495.191	464.446
ENSCSAG00000004072	TRHDE	thyrotropin releasing hormone degrading enzyme	49.3457	0.271831	0.197016	1.38162	0.167089	NA	0.167089	1	62.4036	54.0386	40.9248	40.0158
ENSCSAG00000001879	PUS1	pseudouridine synthase 1	53.6813	0.271821	0.197153	1.38276	0.166738	NA	0.166738	1	79.8186	47.755	52.3838	34.7678
ENSCSAG00000011618	FRMD4B	FERM domain containing 4B	628.256	0.271738	0.139779	1.94437	0.0518513	0.28176	0.0518513	0.28176	692.245	702.502	554.122	564.157
ENSCSAG00000006297		eukaryotic translation initiation factor 3 subunit C	763.11	0.271597	0.141302	1.92247	0.0545464	0.288015	0.0545464	0.288015	918.64	776.648	683.445	673.708
ENSCSAG00000016856	PRAG1	PEAK1 related, kinase-activating pseudokinase 1	22.4316	0.271519	0.186339	1.45838	0.144735	NA	0.144735	1	21.7687	35.1879	16.3699	16.3999
ENSCSAG00000009893	NRF1	nuclear respiratory factor 1	68.7793	0.27151	0.195792	1.38627	0.165663	NA	0.165663	1	74.0136	86.7131	44.1988	70.1916
ENSCSAG00000008040	SHMT1		243.231	0.271294	0.162862	1.66661	0.095591	0.385643	0.095591	0.385643	274.286	270.193	225.087	203.359
ENSCSAG00000011793	MASTL		86.2673	0.271249	0.189715	1.43091	0.152456	0.492216	0.152456	0.492216	97.2336	100.537	74.4832	72.8156
ENSCSAG00000012680	PHC3	polyhomeotic homolog 3	97.2088	0.271181	0.187868	1.44416	0.148695	0.484895	0.148695	0.484895	100.136	121.901	83.4867	83.3116
ENSCSAG00000001444	PKN2	protein kinase N2	316.788	0.271093	0.158691	1.7086	0.0875257	0.369282	0.0875257	0.369282	319.274	388.324	274.196	285.359
ENSCSAG00000004517	ABRAXAS2		75.8271	0.271089	0.193324	1.40239	0.1608	0.502739	0.1608	0.502739	79.8186	95.5101	56.4763	71.5036
ENSCSAG00000009297	CNTLN	centlein	177.519	0.270879	0.170995	1.585	0.112966	0.421667	0.112966	0.421667	204.626	194.79	153.877	156.783
ENSCSAG00000014010	BCOR	BCL6 corepressor	92.2034	0.2708	0.192043	1.40986	0.158581	0.498728	0.158581	0.498728	82.7211	129.441	72.0277	84.6236
ENSCSAG00000014870	POMT1	protein O-mannosyltransferase 1	80.6488	0.270749	0.191202	1.41715	0.156439	0.495889	0.156439	0.495889	88.5261	96.7668	70.3907	66.9116
ENSCSAG00000006677	BOC	BOC cell adhesion associated, oncogene regulated	10.53	0.270619	0.155163	1.77323	0.0761906	NA	0.0761906	1	13.0612	17.594	8.18497	3.27998
ENSCSAG00000004440	LIN54	lin-54 DREAM MuvB core complex component	75.4591	0.270484	0.193682	1.39667	0.162513	0.506043	0.162513	0.506043	72.5624	101.794	60.5688	66.9116
ENSCSAG00000006706	DKC1	dyskerin pseudouridine synthase 1	321.348	0.270292	0.158699	1.70399	0.0883828	0.370593	0.0883828	0.370593	375.873	341.825	308.573	259.119
ENSCSAG00000003921	FTSJ3	FtsJ RNA 2'-O-methyltransferase 3	145.577	0.270204	0.180449	1.49837	0.134037	0.461021	0.134037	0.461021	149.478	179.71	141.6	111.519
ENSCSAG00000006441	IL4R	interleukin 4 receptor	112.123	0.2702	0.184137	1.46873	0.141906	0.474783	0.141906	0.474783	129.161	125.671	103.131	90.5275
ENSCSAG00000003871	TACO1	translational activator of cytochrome c oxidase 1	184.396	0.2702	0.176779	1.52987	0.126049	0.448552	0.126049	0.448552	226.395	189.763	184.98	136.447
ENSCSAG00000012391	ABCB1	ATP binding cassette subfamily B member 1	813.957	0.270186	0.136134	1.98495	0.0471498	0.268494	0.0471498	0.268494	875.102	928.71	735.01	717.004
ENSCSAG00000017016	SLC1A3	solute carrier family 1 member 3	15.7125	0.270055	0.175587	1.54312	0.122802	NA	0.122802	1	21.7687	20.1074	9.82196	11.1519
ENSCSAG00000017290	SEMA4C	semaphorin 4C	116.919	0.269953	0.185004	1.4609	0.144043	0.479341	0.144043	0.479341	148.027	118.131	109.679	91.8395
ENSCSAG00000010471	SETD3	SET domain containing 3, actin histidine methyltransferase	241.26	0.269885	0.163551	1.65105	0.0987289	0.393195	0.0987289	0.393195	278.639	261.396	224.268	200.735
ENSCSAG00000004250	RRM1	ribonucleotide reductase catalytic subunit M1	364.541	0.269776	0.157636	1.71165	0.0869618	0.369282	0.0869618	0.369282	413.605	400.891	284.837	358.83
ENSCSAG00000005520	ESPL1		361.681	0.269265	0.156102	1.72566	0.0844083	0.365065	0.0844083	0.365065	442.63	364.446	330.673	308.974
ENSCSAG00000013513	DENND1A	DENN domain containing 1A	276.625	0.269052	0.166434	1.61683	0.105914	0.408911	0.105914	0.408911	261.225	358.163	249.642	237.471
ENSCSAG00000017909	PDS5B	PDS5 cohesin associated factor B	149.041	0.268932	0.182595	1.47269	0.140836	0.473457	0.140836	0.473457	140.771	197.304	113.771	144.319
ENSCSAG00000017920	BRCA2	BRCA2 DNA repair associated	118.503	0.268921	0.189062	1.42202	0.155021	0.493068	0.155021	0.493068	121.905	149.549	78.5757	123.983
ENSCSAG00000008430			13.3398	0.26891	0.163492	1.66189	0.0965351	NA	0.0965351	1	27.5737	10.0537	6.54797	9.18395
ENSCSAG00000004234	FAM13A	family with sequence similarity 13 member A	137.08	0.268895	0.178803	1.50453	0.132444	0.458205	0.132444	0.458205	145.125	164.629	117.864	120.703
ENSCSAG00000010725	ABCA3		318.768	0.268886	0.167008	1.6108	0.107223	0.411635	0.107223	0.411635	425.215	290.3	274.196	285.359
ENSCSAG00000011235	GNA11		421.015	0.268862	0.152777	1.76049	0.0783253	0.349239	0.0783253	0.349239	509.388	428.539	391.241	354.894
ENSCSAG00000017640	TDRD3	tudor domain containing 3	146.459	0.268787	0.176807	1.52087	0.128292	0.451838	0.128292	0.451838	159.637	170.913	122.775	132.511
ENSCSAG00000009576	KIFC1	kinesin family member C1	97.5125	0.26857	0.18904	1.42231	0.154936	0.493068	0.154936	0.493068	129.161	94.2533	82.6682	83.9676
ENSCSAG00000013807	CAMSAP2	calmodulin regulated spectrin associated protein family member 2	323.004	0.268145	0.168713	1.58927	0.111999	0.420536	0.111999	0.420536	294.603	429.795	258.645	308.974
ENSCSAG00000004743	GPATCH1		172.607	0.267826	0.172853	1.55056	0.121006	0.439278	0.121006	0.439278	206.077	182.223	157.151	144.975
ENSCSAG00000004389	SOX9	SRY-box transcription factor 9	6.64516	0.267572	0.135	2.03723	0.0416268	NA	0.0416268	1	11.61	10.0537	1.63699	3.27998
ENSCSAG00000004276	THAP8	THAP domain containing 8	44.5894	0.267342	0.196973	1.35889	0.17418	NA	0.17418	1	63.8549	42.7282	31.1029	40.6718
ENSCSAG00000007457	PAK1IP1	PAK1 interacting protein 1	61.087	0.267042	0.195602	1.36657	0.171761	NA	0.171761	1	76.9161	65.349	48.2913	53.7917
ENSCSAG00000001738		ribosomal protein L28	3043.38	0.266958	0.12488	2.13779	0.032534	0.218125	0.032534	0.218125	3211.61	3507.48	2701.86	2752.56
ENSCSAG00000002196	NOTUM		47.9218	0.266907	0.197165	1.35467	0.175523	NA	0.175523	1	46.4399	66.6057	42.5618	36.0798
ENSCSAG00000017611	IQCE		190.677	0.266878	0.176267	1.51545	0.12966	0.454089	0.12966	0.454089	243.81	185.993	186.617	146.287
ENSCSAG00000011482	MEMO1		136.58	0.266801	0.179765	1.48461	0.137646	0.469511	0.137646	0.469511	148.027	160.859	108.86	128.575
ENSCSAG00000010689	CTC1	CST telomere replication complex component 1	37577.5	0.266739	0.170342	1.59818	0.110003	0.415527	0.110003	0.415527	71575.5	30846	17981.6	29906.9
ENSCSAG00000010703	DTWD1	tRNA-uridine aminocarboxypropyltransferase 1	34.5206	0.266669	0.193548	1.37693	0.168533	NA	0.168533	1	42.0862	42.7282	17.1884	36.0798
ENSCSAG00000006903	EIF3L		866.43	0.266349	0.138381	1.92488	0.0542442	0.287086	0.0542442	0.287086	898.322	1020.45	747.288	799.66
ENSCSAG00000001968	PBXIP1	PBX homeobox interacting protein 1	84.5279	0.266319	0.191072	1.39535	0.16291	0.506781	0.16291	0.506781	94.3311	99.2802	80.2127	64.2877
ENSCSAG00000001559	STRIP1	striatin interacting protein 1	152.451	0.266235	0.1752	1.52045	0.128397	0.451973	0.128397	0.451973	169.796	173.426	133.415	133.167
ENSCSAG00000008256	TYSND1	trypsin like peroxisomal matrix peptidase 1	63.9164	0.266117	0.196574	1.3564	0.174971	NA	0.174971	1	95.7823	54.0386	54.0208	51.8237
ENSCSAG00000014926	TTF1		67.6412	0.26589	0.194862	1.36575	0.172018	NA	0.172018	1	69.6599	86.7131	63.0243	51.1677
ENSCSAG00000003647	DUXB		18.3734	0.265827	0.178201	1.50186	0.133133	NA	0.133133	1	31.9274	16.3372	14.7329	10.4959
ENSCSAG00000003115	SYMPK	symplekin	139.27	0.265533	0.179039	1.4841	0.137784	0.469511	0.137784	0.469511	149.478	164.629	130.141	112.831
ENSCSAG00000009554	NAP1L4	nucleosome assembly protein 1 like 4	1250.69	0.265319	0.132434	2.00355	0.0451179	0.262176	0.0451179	0.262176	1307.57	1456.53	1135.26	1103.39
ENSCSAG00000012763	TMEM67	transmembrane protein 67	96.8149	0.265192	0.188181	1.40966	0.15864	0.498728	0.15864	0.498728	100.136	120.644	78.5757	87.9035
ENSCSAG00000018878			30.1146	0.26503	0.193697	1.36862	0.171117	NA	0.171117	1	33.3787	40.2148	21.2809	25.5839
ENSCSAG00000004438	FCSK	fucose kinase	69.2647	0.264984	0.195408	1.35874	0.174228	NA	0.174228	1	92.8798	67.8624	67.1167	49.1997
ENSCSAG00000014720	RAPGEF4	Rap guanine nucleotide exchange factor 4	105.18	0.264978	0.187512	1.41399	0.157366	0.497474	0.157366	0.497474	132.064	108.077	80.2127	100.367
ENSCSAG00000010333	WDR25	WD repeat domain 25	63.7644	0.264906	0.194973	1.35985	0.173878	NA	0.173878	1	69.6599	77.9161	55.6578	51.8237
ENSCSAG00000003591			16.3627	0.264729	0.176403	1.50422	0.132526	NA	0.132526	1	23.22	20.1074	9.00347	13.1199
ENSCSAG00000016267	PTCD3	pentatricopeptide repeat domain 3	505.586	0.264538	0.153329	1.72547	0.0844432	0.365065	0.0844432	0.365065	576.145	549.183	391.241	505.773
ENSCSAG00000008919	TRIM16	tripartite motif containing 16	45.1916	0.264405	0.197165	1.34242	0.179461	NA	0.179461	1	56.5986	50.2684	35.1954	38.7038
ENSCSAG00000007817	PFKL	phosphofructokinase, liver type	539.674	0.264378	0.149712	1.76646	0.0773186	0.346911	0.0773186	0.346911	634.195	564.263	524.656	435.582
ENSCSAG00000006231	SENP7		40.9502	0.26416	0.196273	1.34478	0.178696	NA	0.178696	1	39.1837	59.0654	26.1919	39.3598
ENSCSAG00000016708	SNRK	SNF related kinase	74.5894	0.264004	0.192932	1.36946	0.170857	0.517661	0.170857	0.517661	91.4286	80.4295	58.9318	67.5676
ENSCSAG00000008200	HMOX1	heme oxygenase 1	224.301	0.263906	0.166766	1.58343	0.113324	0.422458	0.113324	0.422458	253.968	247.572	215.265	180.399
ENSCSAG00000006104	AKAP8		63.8553	0.263801	0.19535	1.3523	0.176281	NA	0.176281	1	84.1723	64.0923	54.0208	53.1357
ENSCSAG00000003578	CDYL2	chromodomain Y like 2	23.645	0.263711	0.188838	1.3979	0.162144	NA	0.162144	1	29.0249	30.1611	16.3699	19.0239
ENSCSAG00000017230	CRACDL		61.4992	0.263704	0.1962	1.34651	0.178139	NA	0.178139	1	85.6236	57.8087	54.0208	48.5437
ENSCSAG00000012343	KIAA1958	KIAA1958 ortholog	231.539	0.26367	0.166396	1.5849	0.112988	0.421667	0.112988	0.421667	233.651	284.017	197.258	211.231
ENSCSAG00000015831	EVA1A	eva-1 homolog A, regulator of programmed cell death	70.2036	0.263547	0.193521	1.36324	0.172808	NA	0.172808	1	81.2698	80.4295	61.3873	57.7277
ENSCSAG00000017693	INTS6	integrator complex subunit 6	93.2518	0.263526	0.191566	1.37576	0.168896	0.515531	0.168896	0.515531	82.7211	130.698	80.2127	79.3756
ENSCSAG00000015750	LYPLAL1	lysophospholipase like 1	59.6821	0.26351	0.196333	1.34202	0.17959	NA	0.17959	1	63.8549	75.4027	41.7433	57.7277
ENSCSAG00000005656	CWF19L1		127.401	0.263333	0.181704	1.4498	0.147115	0.483205	0.147115	0.483205	145.125	143.265	99.8566	121.359
ENSCSAG00000001274	CC2D1B	coiled-coil and C2 domain containing 1B	92.3066	0.263301	0.189516	1.39104	0.164215	0.508983	0.164215	0.508983	108.844	101.794	88.3977	70.1916
ENSCSAG00000010782	POLR1E	RNA polymerase I subunit E	125.914	0.263288	0.180499	1.45965	0.144387	0.479557	0.144387	0.479557	143.673	140.752	109.679	109.551
ENSCSAG00000012638	STAM	signal transducing adaptor molecule	152.7	0.263271	0.182225	1.44479	0.148518	0.48478	0.148518	0.48478	136.417	208.614	129.322	136.447
ENSCSAG00000013176	TIPIN	TIMELESS interacting protein	346.011	0.263137	0.153238	1.71769	0.0858534	0.367554	0.0858534	0.367554	396.191	373.243	300.388	314.222
ENSCSAG00000008232	ABCB6		59.8256	0.263081	0.195992	1.34328	0.179181	NA	0.179181	1	60.9524	77.9161	53.2023	47.2318
ENSCSAG00000013123	KDM3B		417.072	0.263073	0.148999	1.766	0.0773963	0.346911	0.0773963	0.346911	444.082	481.32	374.872	368.014
ENSCSAG00000015420	HMGCR	3-hydroxy-3-methylglutaryl-CoA reductase	168.675	0.263031	0.175628	1.4979	0.13416	0.461021	0.13416	0.461021	178.503	201.074	131.778	163.343
ENSCSAG00000013302		protein phosphatase, Mg2+/Mn2+ dependent 1B	428.703	0.262858	0.15132	1.73737	0.0823214	0.359307	0.0823214	0.359307	478.912	473.78	349.498	412.622
ENSCSAG00000011953	LAS1L	LAS1 like ribosome biogenesis factor	149.914	0.262703	0.177841	1.47845	0.139289	0.472045	0.139289	0.472045	174.15	163.372	144.055	118.079
ENSCSAG00000015719	CAMSAP1		286.013	0.262567	0.159102	1.65104	0.0987311	0.393195	0.0987311	0.393195	339.592	297.841	255.371	251.247
ENSCSAG00000000767	SPSB1	splA/ryanodine receptor domain and SOCS box containing 1	53.4535	0.262384	0.196965	1.33491	0.181906	NA	0.181906	1	72.5624	52.7819	49.1098	39.3598
ENSCSAG00000004504	IPO7	importin 7	1874.3	0.262118	0.143513	1.82645	0.0677827	0.322015	0.0677827	0.322015	1857.6	2293.5	1496.21	1849.91
ENSCSAG00000007684	MYLK	myosin light chain kinase	458.109	0.261779	0.148085	1.76817	0.0770325	0.34619	0.0770325	0.34619	532.608	483.834	392.878	423.118
ENSCSAG00000011413	RPS6KA5	ribosomal protein S6 kinase A5	117.467	0.261761	0.18313	1.43031	0.152628	0.492253	0.152628	0.492253	124.807	140.752	107.223	97.0875
ENSCSAG00000010975	DDX24	DEAD-box helicase 24	276.278	0.261324	0.160161	1.63225	0.102628	0.402371	0.102628	0.402371	294.603	320.461	257.827	232.223
ENSCSAG00000005675	AMBRA1	autophagy and beclin 1 regulator 1	180.973	0.261099	0.172336	1.51543	0.129664	0.454089	0.129664	0.454089	185.76	219.924	152.24	165.967
ENSCSAG00000005576	EFCAB6	EF-hand calcium binding domain 6	27.1577	0.261047	0.188776	1.38134	0.167175	NA	0.167175	1	29.0249	38.958	13.0959	27.5519
ENSCSAG00000013991	PFKP	phosphofructokinase, platelet	667.45	0.260966	0.142391	1.83314	0.0667817	0.3211	0.0667817	0.3211	793.832	683.651	603.232	589.085
ENSCSAG00000012464	CDC5L	cell division cycle 5 like	613.278	0.260896	0.143648	1.81643	0.069305	0.325619	0.069305	0.325619	628.39	728.893	543.482	552.349
ENSCSAG00000003559	SCLT1		83.6262	0.260878	0.190622	1.36935	0.170889	0.517661	0.170889	0.517661	95.7823	95.5101	67.1167	76.0956
ENSCSAG00000005122	MAU2	MAU2 sister chromatid cohesion factor	90.9571	0.260838	0.188762	1.38265	0.166771	0.511791	0.166771	0.511791	103.039	104.307	74.4832	81.9996
ENSCSAG00000012732	THADA		259.235	0.26083	0.160914	1.62148	0.104916	0.40713	0.104916	0.40713	275.737	301.611	233.272	226.319
ENSCSAG00000003847	TLK2	tousled like kinase 2	366.612	0.260704	0.153159	1.70249	0.0886633	0.37128	0.0886633	0.37128	381.678	432.309	319.214	333.246
ENSCSAG00000015297	KCNH1	potassium voltage-gated channel subfamily H member 1	14.3976	0.260639	0.171638	1.52399	0.127511	NA	0.127511	1	15.9637	22.6208	9.82196	9.18395
ENSCSAG00000013275	SMAD3	SMAD family member 3	231.261	0.260582	0.163405	1.5954	0.110623	0.416483	0.110623	0.416483	256.871	258.883	207.898	201.391
ENSCSAG00000012270		RNA binding motif protein 27	218.128	0.260523	0.165202	1.5777	0.114635	0.424932	0.114635	0.424932	249.615	237.518	189.891	195.487
ENSCSAG00000004842	RECQL5	RecQ like helicase 5	87.254	0.260188	0.19199	1.35715	0.174734	0.520685	0.174734	0.520685	101.587	98.0235	88.3977	61.0077
ENSCSAG00000008844	USP25		299.405	0.260168	0.162793	1.59834	0.109968	0.415527	0.109968	0.415527	288.798	378.27	260.282	270.271
ENSCSAG00000014506	LNPK	lunapark, ER junction formation factor	172.204	0.259949	0.172886	1.50414	0.132545	0.458205	0.132545	0.458205	178.503	207.357	151.422	151.535
ENSCSAG00000008326	PLXNA1		561.202	0.259695	0.151644	1.71308	0.0866984	0.368983	0.0866984	0.368983	693.696	551.696	533.66	465.758
ENSCSAG00000016709	TBPL1	TATA-box binding protein like 1	66.2099	0.259356	0.196132	1.32186	0.186215	NA	0.186215	1	71.1111	82.9429	42.5618	68.2236
ENSCSAG00000009697	NPM1	nucleophosmin 1	71.0729	0.25935	0.195178	1.32841	0.184042	NA	0.184042	1	74.0136	90.4832	48.2913	71.5036
ENSCSAG00000013045	TKT	transketolase	1600.55	0.259244	0.129033	2.00928	0.0445072	0.260179	0.0445072	0.260179	1840.18	1687.76	1425.82	1448.44
ENSCSAG00000014679	DMXL1	Dmx like 1	603.77	0.258987	0.155912	1.66111	0.0966916	0.388246	0.0966916	0.388246	563.084	777.904	503.376	570.717
ENSCSAG00000011787	FAM155B	family with sequence similarity 155 member B	8.66746	0.258751	0.148768	1.76749	0.0771454	NA	0.0771454	1	14.5125	11.3104	4.91098	3.93598
ENSCSAG00000009074	ZC3H3	zinc finger CCCH-type containing 3	85.0389	0.258664	0.189999	1.36242	0.173065	0.518619	0.173065	0.518619	97.2336	96.7668	72.0277	74.1276
ENSCSAG00000015846	CDK7	cyclin dependent kinase 7	106.7	0.258658	0.185636	1.3939	0.163348	0.507691	0.163348	0.507691	117.551	124.414	85.1237	99.7115
ENSCSAG00000006246	ADCY6	adenylate cyclase 6	719.463	0.258629	0.147085	1.7588	0.0786112	0.350107	0.0786112	0.350107	859.138	733.919	702.27	582.525
ENSCSAG00000010452	CCDC85C	coiled-coil domain containing 85C	74.5587	0.258545	0.196505	1.31897	0.18718	0.537207	0.18718	0.537207	103.039	70.3758	80.2127	44.6078
ENSCSAG00000012402	RUNDC3B	RUN domain containing 3B	46.7271	0.258519	0.197145	1.31294	0.189202	NA	0.189202	1	65.3061	45.2416	34.3769	41.9838
ENSCSAG00000008711			320.614	0.25851	0.159655	1.61977	0.105282	0.407625	0.105282	0.407625	338.141	374.5	312.666	257.151
ENSCSAG00000008649	MORC3	MORC family CW-type zinc finger 3	158.093	0.258353	0.179333	1.44068	0.149676	0.486707	0.149676	0.486707	150.93	204.844	127.686	148.911
ENSCSAG00000001218	NASP		556.158	0.258208	0.148522	1.73897	0.0820398	0.358537	0.0820398	0.358537	682.086	550.44	496.828	495.277
ENSCSAG00000003202	RAPGEF2		172.77	0.258118	0.179073	1.44132	0.149496	0.486707	0.149496	0.486707	162.54	226.208	135.052	167.279
ENSCSAG00000007885	ETNK1		208.21	0.258098	0.169374	1.52416	0.127469	0.450892	0.127469	0.450892	207.528	257.626	180.069	187.615
ENSCSAG00000001344	ITGB3BP		130.7	0.258083	0.180788	1.42807	0.153272	0.492305	0.153272	0.492305	146.576	148.292	103.949	123.983
ENSCSAG00000007376	RREB1	ras responsive element binding protein 1	147.966	0.257957	0.177222	1.45602	0.145387	0.480538	0.145387	0.480538	155.283	177.196	123.593	135.791
ENSCSAG00000005759	EPS15L1	epidermal growth factor receptor pathway substrate 15 like 1	100.752	0.257913	0.188692	1.36701	0.171622	0.517661	0.171622	0.517661	95.7823	133.211	83.4867	90.5275
ENSCSAG00000011876	CRIM1	cysteine rich transmembrane BMP regulator 1	1718.19	0.2579	0.133136	1.93731	0.0527073	0.282458	0.0527073	0.282458	1983.86	1804.64	1647.63	1436.63
ENSCSAG00000006264	TMEM132A	transmembrane protein 132A	269.826	0.257824	0.176654	1.46065	0.144111	0.479341	0.144111	0.479341	370.068	236.262	267.648	205.327
ENSCSAG00000015791	G2E3		232.256	0.257618	0.168359	1.53033	0.125936	0.448552	0.125936	0.448552	243.81	275.22	181.706	228.287
ENSCSAG00000015560		dynactin subunit 1	324.841	0.257472	0.158575	1.62443	0.104285	0.405506	0.104285	0.405506	390.386	331.772	306.936	270.271
ENSCSAG00000015192	VCPKMT	valosin containing protein lysine methyltransferase	45.2177	0.257306	0.197165	1.30588	0.191595	NA	0.191595	1	53.6962	52.7819	34.3769	40.0158
ENSCSAG00000010668	CYFIP2	cytoplasmic FMR1 interacting protein 2	531.984	0.257129	0.145269	1.77023	0.0766882	0.345348	0.0766882	0.345348	565.986	610.762	452.629	498.557
ENSCSAG00000017092		LTV1 ribosome biogenesis factor	78.1232	0.256764	0.192317	1.33641	0.181417	0.528521	0.181417	0.528521	98.6848	80.4295	63.8428	69.5356
ENSCSAG00000016911	SMPD4		234.702	0.256748	0.170586	1.50581	0.132115	0.45774	0.132115	0.45774	301.859	223.695	191.528	221.727
ENSCSAG00000016563	STEAP3	STEAP3 metalloreductase	205.821	0.256699	0.167132	1.53674	0.124357	0.445216	0.124357	0.445216	239.456	219.924	184.162	179.743
ENSCSAG00000008250	KLHL29		22.656	0.256559	0.187362	1.37096	0.170388	NA	0.170388	1	30.4762	26.3909	14.7329	19.0239
ENSCSAG00000012616		cytochrome c oxidase subunit 7A2 like	408.911	0.256464	0.148583	1.7265	0.0842576	0.364956	0.0842576	0.364956	452.789	452.416	365.05	365.39
ENSCSAG00000018768	FZD7	frizzled class receptor 7	22.7533	0.256396	0.186958	1.37388	0.169478	NA	0.169478	1	33.3787	23.8775	14.7329	19.0239
ENSCSAG00000010359	NTN1	netrin 1	22.0449	0.256368	0.186079	1.38276	0.166739	NA	0.166739	1	29.0249	26.3909	19.6439	13.1199
ENSCSAG00000015159	GIN1	gypsy retrotransposon integrase 1	33.4937	0.256232	0.1906	1.34219	0.179535	NA	0.179535	1	26.1225	56.552	17.1884	34.1118
ENSCSAG00000014424	SLC12A2	solute carrier family 12 member 2	177.603	0.256214	0.174068	1.47224	0.140957	0.473457	0.140957	0.473457	195.918	202.331	138.326	173.839
ENSCSAG00000012367	MATN2		353.153	0.256081	0.152553	1.67904	0.0931449	0.380365	0.0931449	0.380365	383.129	399.634	307.755	322.094
ENSCSAG00000011962	DHX36	DEAH-box helicase 36	251.087	0.255991	0.164529	1.55617	0.119669	0.4368	0.119669	0.4368	252.517	306.638	213.628	231.567
ENSCSAG00000001248	STIL		103.918	0.255976	0.187247	1.36754	0.171456	0.517661	0.171456	0.517661	120.454	115.617	78.5757	101.023
ENSCSAG00000009604	TMEM40		53.6516	0.255848	0.196809	1.30226	0.192827	NA	0.192827	1	71.1111	54.0386	47.4728	41.9838
ENSCSAG00000014977	CSE1L	chromosome segregation 1 like	748.154	0.255835	0.146741	1.7435	0.0812459	0.356437	0.0812459	0.356437	757.551	897.292	608.962	728.812
ENSCSAG00000002226	ARHGAP32		103.244	0.255735	0.18827	1.35855	0.174288	0.520347	0.174288	0.520347	97.2336	136.982	87.5792	91.1835
ENSCSAG00000011174	CLSTN2		56.9871	0.255451	0.196314	1.30312	0.192532	NA	0.192532	1	66.7574	65.349	53.2023	42.6398
ENSCSAG00000017271	PDE8A	phosphodiesterase 8A	193.331	0.255435	0.170618	1.4977	0.134211	0.461021	0.134211	0.461021	226.395	206.101	157.151	183.679
ENSCSAG00000007532	BAHD1	bromo adjacent homology domain containing 1	69.1906	0.255385	0.193842	1.31886	0.187217	NA	0.187217	1	78.3674	80.4295	62.2058	55.7597
ENSCSAG00000006037	MYO19		113.335	0.255209	0.184423	1.385	0.166051	0.510886	0.166051	0.510886	140.771	115.617	96.5826	100.367
ENSCSAG00000006766	ODAD3	outer dynein arm docking complex subunit 3	11.7354	0.25518	0.161736	1.59505	0.1107	NA	0.1107	1	18.8662	13.8238	9.00347	5.24797
ENSCSAG00000001465	BTBD8		26.8724	0.255114	0.187987	1.35544	0.175279	NA	0.175279	1	21.7687	45.2416	15.5514	24.9279
ENSCSAG00000019082	H2AC14	histone H2A type 1-J	195.629	0.254992	0.173365	1.47199	0.141024	0.473457	0.141024	0.473457	249.615	188.507	181.706	162.687
ENSCSAG00000016848	DPH7		32.432	0.254756	0.193117	1.32234	0.186056	NA	0.186056	1	33.3787	45.2416	32.7399	18.3679
ENSCSAG00000000871	TAS1R2	taste 1 receptor member 2	3.69913	0.254669	0.10413	3.08895	0.00200867	NA	0.00200867	1	7.25624	7.54027	0	0
ENSCSAG00000012471	TFPI	tissue factor pathway inhibitor	205.694	0.254656	0.176225	1.44492	0.148481	0.48478	0.148481	0.48478	197.37	263.909	155.514	205.983
ENSCSAG00000018282			26.6903	0.254582	0.191487	1.3301	0.183487	NA	0.183487	1	29.0249	36.4446	19.6439	21.6479
ENSCSAG00000013455	PIAS1	protein inhibitor of activated STAT 1	125.019	0.254542	0.187862	1.35489	0.175452	0.521436	0.175452	0.521436	105.941	177.196	108.042	108.895
ENSCSAG00000012462	GULP1		434.427	0.254437	0.157479	1.61572	0.106155	0.409611	0.106155	0.409611	422.313	541.643	355.228	418.526
ENSCSAG00000010983	RASSF7	Ras association domain family member 7	57.9762	0.254371	0.196726	1.2958	0.195043	NA	0.195043	1	78.3674	56.552	55.6578	41.3278
ENSCSAG00000007603	GKAP1	G kinase anchoring protein 1	55.5209	0.254256	0.196728	1.29405	0.19565	NA	0.19565	1	75.4649	54.0386	43.3803	49.1997
ENSCSAG00000009856	SNX17	sorting nexin 17	350.818	0.254053	0.160905	1.57968	0.114179	0.424429	0.114179	0.424429	435.374	344.339	338.858	284.703
ENSCSAG00000017432	AHRR		62.7521	0.253984	0.195957	1.29593	0.195	NA	0.195	1	60.9524	84.1997	47.4728	58.3837
ENSCSAG00000002689	MED1		234.13	0.253808	0.165912	1.53018	0.125971	0.448552	0.125971	0.448552	265.578	256.369	188.254	226.319
ENSCSAG00000014034	TRA2B	transformer 2 beta homolog	686.865	0.253597	0.1429	1.77477	0.0759359	0.344234	0.0759359	0.344234	706.757	809.322	585.225	646.157
ENSCSAG00000017483	TPP2	tripeptidyl peptidase 2	120.803	0.253592	0.18538	1.36797	0.171322	0.517661	0.171322	0.517661	126.259	147.035	89.2162	120.703
ENSCSAG00000016311	MCM6	minichromosome maintenance complex component 6	720.244	0.253476	0.137691	1.84118	0.0655946	0.318024	0.0655946	0.318024	809.796	777.904	639.246	654.029
ENSCSAG00000018240	ZNF236	zinc finger protein 236	137.041	0.253353	0.178463	1.4203	0.155521	0.49399	0.155521	0.49399	148.027	159.602	117.864	122.671
ENSCSAG00000014567	UBA7	ubiquitin like modifier activating enzyme 7	24.8887	0.253208	0.189446	1.33656	0.181365	NA	0.181365	1	29.0249	32.6745	15.5514	22.3039
ENSCSAG00000005134	TBC1D22A	TBC1 domain family member 22A	166.667	0.253181	0.172953	1.46478	0.142981	0.477443	0.142981	0.477443	193.016	179.71	148.966	144.975
ENSCSAG00000006815	KCNH2		25.0106	0.25309	0.190202	1.33156	0.183004	NA	0.183004	1	29.0249	32.6745	18.0069	20.3359
ENSCSAG00000017719	USP42	ubiquitin specific peptidase 42	112.568	0.253029	0.186462	1.35706	0.174764	0.520685	0.174764	0.520685	108.844	145.779	90.0347	105.615
ENSCSAG00000015043	SEC63		230.353	0.252888	0.172821	1.46329	0.143387	0.478565	0.143387	0.478565	210.431	304.124	192.347	214.511
ENSCSAG00000006724	SLC38A2	solute carrier family 38 member 2	1444.55	0.252849	0.141006	1.7932	0.0729403	0.334606	0.0729403	0.334606	1465.76	1720.44	1170.45	1421.54
ENSCSAG00000003734			77.7565	0.252815	0.192552	1.31332	0.189077	0.54083	0.189077	0.54083	78.3674	99.2802	63.8428	69.5356
ENSCSAG00000002201	KDM2B		197.716	0.252647	0.168922	1.49645	0.134537	0.461676	0.134537	0.461676	235.102	206.101	171.884	177.775
ENSCSAG00000016832	MAP3K2	mitogen-activated protein kinase kinase kinase 2	277.667	0.252637	0.161804	1.56171	0.118357	0.433869	0.118357	0.433869	277.188	339.312	248.823	245.343
ENSCSAG00000004527	MON2	MON2 homolog, regulator of endosome-to-Golgi trafficking	210.871	0.252637	0.168258	1.50182	0.133144	0.459436	0.133144	0.459436	214.785	255.112	180.069	193.519
ENSCSAG00000015500	RALGAPA1	Ral GTPase activating protein catalytic subunit alpha 1	365.672	0.252635	0.158996	1.58906	0.112046	0.420536	0.112046	0.420536	394.739	417.228	284.018	366.702
ENSCSAG00000004092	THAP2	THAP domain containing 2	43.9028	0.252436	0.197145	1.281	0.200194	NA	0.200194	1	47.8912	55.2953	34.3769	38.0478
ENSCSAG00000013728	RPRD1B	regulation of nuclear pre-mRNA domain containing 1B	198.549	0.252186	0.170946	1.47546	0.140089	0.472662	0.140089	0.472662	203.175	240.032	162.062	188.927
ENSCSAG00000017734	FNDC3A	fibronectin type III domain containing 3A	186.73	0.252083	0.177756	1.4182	0.156131	0.495639	0.156131	0.495639	166.893	251.342	162.062	166.623
ENSCSAG00000004684	BTBD10	BTB domain containing 10	79.3023	0.252013	0.191633	1.31607	0.188151	0.539539	0.188151	0.539539	94.3311	86.7131	64.6612	71.5036
ENSCSAG00000013635	SNAP25	synaptosome associated protein 25	12.278	0.251942	0.161957	1.56243	0.118186	NA	0.118186	1	10.1587	23.8775	6.54797	8.52796
ENSCSAG00000013474	BZW2	basic leucine zipper and W2 domains 2	328.044	0.251865	0.15731	1.60153	0.109259	0.414693	0.109259	0.414693	386.032	341.825	273.378	310.942
ENSCSAG00000017624	GNA12	G protein subunit alpha 12	298.59	0.251808	0.156572	1.60872	0.107677	0.412353	0.107677	0.412353	323.628	338.055	264.374	268.303
ENSCSAG00000015291	HHAT		32.6754	0.251744	0.194636	1.29491	0.195352	NA	0.195352	1	44.9887	33.9312	22.9179	28.8638
ENSCSAG00000014817	CRYBG1		120.95	0.25163	0.184327	1.36525	0.172175	0.518273	0.172175	0.518273	123.356	149.549	94.1271	116.767
ENSCSAG00000010865	EEF2	eukaryotic translation elongation factor 2	6174.52	0.251421	0.123468	2.03638	0.041712	0.252232	0.041712	0.252232	7095.15	6459.5	5726.2	5417.22
ENSCSAG00000019446			72.1875	0.251308	0.193648	1.29959	0.193742	0.547291	0.193742	0.547291	89.9773	75.4027	66.2982	57.0717
ENSCSAG00000008505	ATF7IP	activating transcription factor 7 interacting protein	215.154	0.251172	0.17092	1.47004	0.141552	0.474297	0.141552	0.474297	210.431	268.936	205.443	175.807
ENSCSAG00000014923	SULF2	sulfatase 2	645.579	0.251026	0.140195	1.79091	0.0733078	0.334951	0.0733078	0.334951	731.429	691.191	594.229	565.469
ENSCSAG00000003648	NR2C1	nuclear receptor subfamily 2 group C member 1	150.997	0.250901	0.177823	1.41124	0.158173	0.498728	0.158173	0.498728	152.381	185.993	125.23	140.383
ENSCSAG00000012006	SLC39A10	solute carrier family 39 member 10	375.952	0.250815	0.153128	1.6382	0.101379	0.399081	0.101379	0.399081	403.447	428.539	314.303	357.518
ENSCSAG00000006316	RAD51D		41.1142	0.250713	0.196599	1.27834	0.20113	NA	0.20113	1	50.7937	46.4983	40.9248	26.2399
ENSCSAG00000007723	CAPN1		565.589	0.250693	0.154222	1.62605	0.103939	0.405185	0.103939	0.405185	716.916	535.359	531.204	478.877
ENSCSAG00000017414	TTK	TTK protein kinase	102.869	0.250686	0.190665	1.31448	0.188685	0.539936	0.188685	0.539936	107.392	126.928	69.5722	107.583
ENSCSAG00000008747			45.1435	0.250593	0.197161	1.27222	0.203295	NA	0.203295	1	47.8912	57.8087	40.1063	34.7678
ENSCSAG00000009127	CNST	consortin, connexin sorting protein	175.891	0.250545	0.172673	1.45136	0.146678	0.482469	0.146678	0.482469	182.857	209.871	148.148	162.687
ENSCSAG00000001020	OPRD1		21.0785	0.250528	0.182385	1.38173	0.167054	NA	0.167054	1	34.8299	18.8507	18.8254	11.8079
ENSCSAG00000007479	POFUT2		58.8715	0.250492	0.196089	1.27916	0.200841	NA	0.200841	1	66.7574	69.1191	55.6578	43.9518
ENSCSAG00000014608	MAP3K15		24.06	0.250354	0.187925	1.33145	0.183041	NA	0.183041	1	24.6712	35.1879	14.7329	21.6479
ENSCSAG00000009442	DDX11	DEAD/H-box helicase 11	77.3472	0.250312	0.193333	1.29657	0.194778	0.548628	0.194778	0.548628	89.9773	86.7131	76.9387	55.7597
ENSCSAG00000005473		cyclic AMP-dependent transcription factor ATF-7	55.4372	0.250059	0.196681	1.27367	0.202781	NA	0.202781	1	68.2086	60.3221	53.2023	40.0158
ENSCSAG00000005328	FBLN1	fibulin 1	291.397	0.249924	0.160211	1.56072	0.11859	0.434492	0.11859	0.434492	351.202	295.327	268.467	250.591
ENSCSAG00000006581	KMT2C	lysine methyltransferase 2C	255.123	0.249822	0.169693	1.47231	0.140938	0.473457	0.140938	0.473457	233.651	334.285	224.268	228.287
ENSCSAG00000019040	EPOP	elongin BC and polycomb repressive complex 2 associated protein	22.3869	0.249767	0.183996	1.3634	0.172756	NA	0.172756	1	39.1837	17.594	16.3699	16.3999
ENSCSAG00000015102	CEMIP		44.3912	0.249754	0.197161	1.2682	0.204726	NA	0.204726	1	55.1474	49.0117	36.0139	37.3918
ENSCSAG00000005229		extended synaptotagmin 1	702.074	0.249748	0.146204	1.70862	0.0875208	0.369282	0.0875208	0.369282	809.796	738.946	694.085	565.469
ENSCSAG00000004791	CASKIN2		80.8093	0.249647	0.191913	1.30258	0.192718	0.546207	0.192718	0.546207	98.6848	85.4564	76.1202	62.9757
ENSCSAG00000009760	KIF26A		83.5639	0.24964	0.191836	1.30294	0.192596	0.546089	0.192596	0.546089	110.295	80.4295	72.0277	71.5036
ENSCSAG00000008727	CAPN3		12.6873	0.249166	0.155737	1.61163	0.107042	NA	0.107042	1	7.25624	28.9044	4.09248	10.4959
ENSCSAG00000015144	UBR3		306.742	0.249066	0.158935	1.5674	0.117022	0.430827	0.117022	0.430827	339.592	340.569	249.642	297.166
ENSCSAG00000002160	ADAMTS15		41.5531	0.249053	0.19668	1.2667	0.205262	NA	0.205262	1	37.7324	60.3221	36.0139	32.1438
ENSCSAG00000006972	SGMS1	sphingomyelin synthase 1	43.1553	0.248987	0.197078	1.26379	0.206304	NA	0.206304	1	43.5374	57.8087	35.1954	36.0798
ENSCSAG00000016413	CCNT2	cyclin T2	122.294	0.248963	0.185012	1.34573	0.178388	0.525128	0.178388	0.525128	114.649	160.859	101.494	112.175
ENSCSAG00000012918	SIPA1L1	signal induced proliferation associated 1 like 1	253.611	0.248698	0.165888	1.49947	0.133751	0.460601	0.133751	0.460601	245.261	317.948	227.542	223.695
ENSCSAG00000016356	R3HDM1	R3H domain containing 1	217.336	0.248566	0.185323	1.34077	0.179995	0.527687	0.179995	0.527687	177.052	312.921	156.333	223.039
ENSCSAG00000007456	SLC19A1		43.6974	0.248551	0.197016	1.26428	0.206131	NA	0.206131	1	53.6962	49.0117	42.5618	29.5198
ENSCSAG00000007197	IPPK	inositol-pentakisphosphate 2-kinase	67.4815	0.248359	0.195519	1.27162	0.203508	NA	0.203508	1	68.2086	86.7131	67.1167	47.8877
ENSCSAG00000013384	ECHDC3	enoyl-CoA hydratase domain containing 3	51.8695	0.248359	0.196912	1.26252	0.206763	NA	0.206763	1	66.7574	54.0386	40.1063	46.5758
ENSCSAG00000004536	USP15	ubiquitin specific peptidase 15	296.097	0.247994	0.164251	1.5099	0.131069	0.456434	0.131069	0.456434	291.701	365.703	239.001	287.982
ENSCSAG00000017206	CDH6	cadherin 6	5133.49	0.247875	0.126576	1.95834	0.0501899	0.278575	0.0501899	0.278575	5302.86	5959.32	4430.52	4841.25
ENSCSAG00000007203	SERPINB1	serpin family B member 1	43.572	0.247806	0.197096	1.25775	0.208482	NA	0.208482	1	52.2449	50.2684	31.1029	40.6718
ENSCSAG00000016783	POLR1B	RNA polymerase I subunit B	247.324	0.247779	0.161941	1.53051	0.12589	0.448552	0.12589	0.448552	267.03	281.503	214.446	226.319
ENSCSAG00000001191	DPH2	diphthamide biosynthesis 2	35.614	0.247746	0.196076	1.26498	0.205878	NA	0.205878	1	40.6349	43.9849	30.2844	27.5519
ENSCSAG00000005681	ZNF408	prothrombin	51.9507	0.247724	0.197109	1.26044	0.207511	NA	0.207511	1	75.4649	46.4983	52.3838	33.4558
ENSCSAG00000018623	SPRY2	sprouty RTK signaling antagonist 2	47.6798	0.247396	0.197137	1.25671	0.208858	NA	0.208858	1	62.4036	49.0117	39.2878	40.0158
ENSCSAG00000016303	DARS1	aspartyl-tRNA synthetase 1	470.215	0.247222	0.148448	1.66567	0.0957794	0.385718	0.0957794	0.385718	532.608	505.198	393.697	449.358
ENSCSAG00000011459	KCNK13	potassium two pore domain channel subfamily K member 13	23.0535	0.247049	0.187564	1.31819	0.187441	NA	0.187441	1	23.22	33.9312	18.0069	17.0559
ENSCSAG00000004023			142.801	0.247048	0.177649	1.39118	0.164171	0.508983	0.164171	0.508983	152.381	167.143	121.138	130.543
ENSCSAG00000014156	LRRFIP2	LRR binding FLII interacting protein 2	219.811	0.246916	0.166424	1.48421	0.137754	0.469511	0.137754	0.469511	227.846	260.139	202.987	188.271
ENSCSAG00000013508		aryl hydrocarbon receptor	193.258	0.246812	0.172186	1.43358	0.151693	0.490487	0.151693	0.490487	194.467	236.262	157.97	184.335
ENSCSAG00000003956	PPP1R12A		461.151	0.246778	0.147061	1.67835	0.0932791	0.380365	0.0932791	0.380365	486.168	530.332	407.611	420.494
ENSCSAG00000009014	ZNF496	zinc finger protein 496	295.334	0.246764	0.164278	1.50298	0.132845	0.458869	0.132845	0.458869	361.361	294.07	289.748	236.159
ENSCSAG00000006461	FEN1		144.067	0.246725	0.17829	1.38498	0.166057	0.510886	0.166057	0.510886	175.601	147.035	130.959	122.671
ENSCSAG00000016347	COL20A1		3.96039	0.246724	0.107811	2.4143	0.0157653	NA	0.0157653	1	10.1587	5.02684	0	0.655997
ENSCSAG00000012360	QSOX1	quiescin sulfhydryl oxidase 1	156.82	0.246571	0.183274	1.34685	0.178027	0.525076	0.178027	0.525076	190.113	162.116	166.155	108.895
ENSCSAG00000003949	CENPT	centromere protein T	58.9559	0.246547	0.196332	1.25786	0.208442	NA	0.208442	1	79.8186	56.552	51.5653	47.8877
ENSCSAG00000008327	VARS2	valyl-tRNA synthetase 2, mitochondrial	274.545	0.246464	0.174935	1.40992	0.158563	0.498728	0.158563	0.498728	375.873	237.518	264.374	220.415
ENSCSAG00000009883		dihydrouridine synthase 3 like	140.598	0.246298	0.180665	1.36461	0.172377	0.518273	0.172377	0.518273	178.503	136.982	130.141	116.767
ENSCSAG00000017340	AKIRIN2	akirin 2	82.2532	0.246288	0.194658	1.26449	0.206053	0.562398	0.206053	0.562398	75.4649	113.104	56.4763	83.9676
ENSCSAG00000008393	SGPL1	sphingosine-1-phosphate lyase 1	302.751	0.246186	0.158638	1.55233	0.120584	0.438737	0.120584	0.438737	352.653	317.948	253.734	286.67
ENSCSAG00000015490	DUSP11		100.194	0.246173	0.187387	1.31486	0.188558	0.539799	0.188558	0.539799	124.807	101.794	84.3052	89.8715
ENSCSAG00000001967	AACS	acetoacetyl-CoA synthetase	198.751	0.246037	0.170297	1.44574	0.148249	0.48478	0.148249	0.48478	233.651	208.614	190.71	162.031
ENSCSAG00000007194	MCM3AP	minichromosome maintenance complex component 3 associated protein	167.167	0.245684	0.175734	1.39919	0.161755	0.505495	0.161755	0.505495	195.918	177.196	163.699	131.855
ENSCSAG00000012756	PAPLN		126.378	0.24555	0.185677	1.32413	0.18546	0.534745	0.18546	0.534745	165.442	119.388	123.593	97.0875
ENSCSAG00000015907	PKP4	plakophilin 4	548.617	0.245417	0.142753	1.71945	0.0855326	0.367554	0.0855326	0.367554	597.914	609.505	481.276	505.773
ENSCSAG00000015883	DUSP10	dual specificity phosphatase 10	17.1122	0.245353	0.178034	1.37902	0.167887	NA	0.167887	1	20.3175	23.8775	9.82196	14.4319
ENSCSAG00000013324	EIF2S1	eukaryotic translation initiation factor 2 subunit alpha	185.377	0.245209	0.170748	1.43701	0.150714	0.488281	0.150714	0.488281	219.138	193.534	169.429	159.407
ENSCSAG00000001686	SLC22A15		37.8795	0.244933	0.196348	1.2501	0.211261	NA	0.211261	1	50.7937	38.958	33.5584	28.2079
ENSCSAG00000016733	PCM1		691.738	0.244933	0.139945	1.75039	0.0800518	0.353929	0.0800518	0.353929	732.88	787.958	599.958	646.157
ENSCSAG00000008994	FGFR4		117.712	0.244909	0.184396	1.32959	0.183652	0.531825	0.183652	0.531825	148.027	116.874	108.86	97.0875
ENSCSAG00000001468	RPAP2	RNA polymerase II associated protein 2	169.309	0.244868	0.174385	1.40448	0.160176	0.50171	0.160176	0.50171	172.698	204.844	141.6	158.095
ENSCSAG00000009734	CAAP1		167.319	0.244822	0.173411	1.41235	0.157846	0.49853	0.157846	0.49853	174.15	198.56	148.966	147.599
ENSCSAG00000005557	HLF	HLF transcription factor, PAR bZIP family member	11.8021	0.244601	0.163006	1.51241	0.13043	NA	0.13043	1	15.9637	16.3372	9.00347	5.90397
ENSCSAG00000009932			40.7393	0.244399	0.196677	1.24342	0.213712	NA	0.213712	1	53.6962	42.7282	27.8289	38.7038
ENSCSAG00000017886	STAG3	stromal antigen 3	23.7365	0.244297	0.187657	1.30642	0.19141	NA	0.19141	1	36.2812	22.6208	19.6439	16.3999
ENSCSAG00000015106	PJA2	praja ring finger ubiquitin ligase 2	398.628	0.244164	0.155532	1.56997	0.116422	0.429546	0.116422	0.429546	399.093	481.32	332.31	381.79
ENSCSAG00000008328	DRG2	developmentally regulated GTP binding protein 2	120.742	0.244071	0.182248	1.33977	0.180319	0.528097	0.180319	0.528097	126.259	144.522	103.949	108.239
ENSCSAG00000018248	CTDP1		128.856	0.243865	0.184227	1.32528	0.18508	0.534261	0.18508	0.534261	163.991	125.671	126.049	99.7115
ENSCSAG00000006359	PDGFB	platelet derived growth factor subunit B	356.661	0.243785	0.160661	1.51813	0.128983	0.452169	0.128983	0.452169	442.63	346.852	344.587	292.574
ENSCSAG00000013107	GRIPAP1		52.9464	0.243382	0.197165	1.23725	0.215993	NA	0.215993	1	79.8186	43.9849	46.6543	41.3278
ENSCSAG00000017057	ADGRG6	adhesion G protein-coupled receptor G6	601.709	0.243369	0.15702	1.54989	0.121169	0.439429	0.121169	0.439429	600.816	728.893	459.177	617.949
ENSCSAG00000017971	PAN3	poly(A) specific ribonuclease subunit PAN3	200.547	0.243159	0.176869	1.37464	0.169242	0.515776	0.169242	0.515776	190.113	257.626	153.059	201.391
ENSCSAG00000012850	CCDC66		79.2406	0.243059	0.192369	1.26389	0.206268	0.562398	0.206268	0.562398	89.9773	90.4832	59.7503	76.7516
ENSCSAG00000011321	U2SURP	U2 snRNP associated SURP domain containing	288.155	0.243035	0.158927	1.52958	0.126121	0.448552	0.126121	0.448552	297.506	339.312	255.371	260.431
ENSCSAG00000007054	PHF2	PHD finger protein 2	292.136	0.242954	0.158163	1.53645	0.124429	0.445216	0.124429	0.445216	306.213	339.312	255.371	267.647
ENSCSAG00000014069	MYBL2	MYB proto-oncogene like 2	524.02	0.242763	0.152135	1.59615	0.110456	0.416255	0.110456	0.416255	570.34	584.371	528.749	412.622
ENSCSAG00000000893	MUL1	mitochondrial E3 ubiquitin protein ligase 1	63.0976	0.242669	0.195159	1.24504	0.213116	NA	0.213116	1	75.4649	69.1191	57.2948	50.5117
ENSCSAG00000006934	TRAPPC12	trafficking protein particle complex 12	139.532	0.242585	0.177786	1.36538	0.172134	0.518273	0.172134	0.518273	159.637	152.062	124.412	122.015
ENSCSAG00000011717	SF3A2	splicing factor 3a subunit 2	53.6885	0.242557	0.196897	1.23172	0.218054	NA	0.218054	1	56.5986	67.8624	38.4694	51.8237
ENSCSAG00000014689	SP3		637.894	0.242499	0.151501	1.60066	0.109451	0.415051	0.109451	0.415051	647.256	759.054	505.013	640.253
ENSCSAG00000008474	PODXL2		176.151	0.242416	0.17627	1.37646	0.16868	0.515531	0.16868	0.515531	223.492	169.656	167.792	143.663
ENSCSAG00000013970	FNIP1	folliculin interacting protein 1	280.29	0.242373	0.166124	1.45904	0.144554	0.479878	0.144554	0.479878	265.578	355.649	234.909	265.023
ENSCSAG00000004218	DHX38	DEAH-box helicase 38	146.812	0.242325	0.178039	1.36223	0.173125	0.518619	0.173125	0.518619	178.503	149.549	135.87	123.327
ENSCSAG00000002049	ATP6V0A2	ATPase H+ transporting V0 subunit a2	104.897	0.242251	0.185421	1.30732	0.191105	0.54314	0.191105	0.54314	120.454	115.617	88.3977	95.1195
ENSCSAG00000006369	MYO1D	myosin ID	245.437	0.242138	0.164334	1.47383	0.140527	0.473187	0.140527	0.473187	246.712	296.584	222.631	215.823
ENSCSAG00000010992	ARMC8	armadillo repeat containing 8	176.214	0.242078	0.17478	1.38536	0.165943	0.510886	0.165943	0.510886	169.796	222.438	157.151	155.471
ENSCSAG00000006697	SLC4A2	solute carrier family 4 member 2	281.252	0.241884	0.160516	1.50765	0.131645	0.456806	0.131645	0.456806	326.531	295.327	267.648	235.503
ENSCSAG00000014571	CEP120	centrosomal protein 120	144.965	0.241859	0.176807	1.36865	0.17111	0.517661	0.17111	0.517661	163.991	159.602	124.412	131.855
ENSCSAG00000018014	NAT16		38.6254	0.241796	0.196038	1.23684	0.216146	NA	0.216146	1	55.1474	36.4446	36.0139	26.8959
ENSCSAG00000009841	NDRG1	N-myc downstream regulated 1	532.372	0.241637	0.14312	1.6887	0.0912765	0.375793	0.0912765	0.375793	590.658	579.344	487.824	471.662
ENSCSAG00000001980	ZBTB7B	zinc finger and BTB domain containing 7B	57.8682	0.241624	0.196576	1.2315	0.218136	NA	0.218136	1	78.3674	55.2953	53.2023	44.6078
ENSCSAG00000015701			9.52227	0.241566	0.153196	1.59242	0.111291	NA	0.111291	1	15.9637	11.3104	4.91098	5.90397
ENSCSAG00000007695	ZNF559		38.4259	0.24129	0.196661	1.22822	0.219365	NA	0.219365	1	47.8912	42.7282	30.2844	32.7998
ENSCSAG00000017112	DNAJC21		182.075	0.240998	0.173676	1.38809	0.165108	0.5099	0.165108	0.5099	178.503	226.208	169.429	154.159
ENSCSAG00000005268		UDP-glucuronosyltransferase 2B18	16.981	0.240947	0.173997	1.39418	0.163263	NA	0.163263	1	31.9274	12.5671	12.2775	11.1519
ENSCSAG00000008631	CHAF1B	chromatin assembly factor 1 subunit B	121.852	0.240849	0.183229	1.31579	0.188244	0.53958	0.188244	0.53958	143.673	129.441	117.864	96.4315
ENSCSAG00000017323	CCT5	chaperonin containing TCP1 subunit 5	1005.15	0.240837	0.132374	1.81957	0.0688252	0.323927	0.0688252	0.323927	1101.5	1100.88	917.535	900.683
ENSCSAG00000011306	BYSL	bystin like	69.1779	0.240808	0.196005	1.23069	0.218439	NA	0.218439	1	101.587	57.8087	58.9318	58.3837
ENSCSAG00000015669	NELFA	negative elongation factor complex member A	114.304	0.240783	0.185642	1.29849	0.194118	0.547673	0.194118	0.547673	146.576	110.591	105.586	94.4635
ENSCSAG00000011703	EIF3E		2137.3	0.240522	0.134566	1.78742	0.0738692	0.33663	0.0738692	0.33663	2175.42	2509.65	1792.51	2071.64
ENSCSAG00000008717	EIF4ENIF1	eukaryotic translation initiation factor 4E nuclear import factor 1	153.06	0.240265	0.176229	1.3643	0.172472	0.518273	0.172472	0.518273	184.308	157.089	135.052	135.791
ENSCSAG00000004401	PPP2R2D		146.258	0.240191	0.178063	1.34979	0.177083	0.523278	0.177083	0.523278	178.503	148.292	124.412	133.823
ENSCSAG00000011889	MAGI1		65.3056	0.240155	0.195162	1.23083	0.218386	NA	0.218386	1	63.8549	85.4564	54.8393	57.0717
ENSCSAG00000008279	TUBB	tubulin beta class I	2236.46	0.240039	0.127131	1.88818	0.0590011	0.299261	0.0590011	0.299261	2371.34	2522.22	1947.2	2105.09
ENSCSAG00000009717	PAXBP1		131.73	0.239989	0.180797	1.32772	0.18427	0.532666	0.18427	0.532666	134.966	159.602	109.679	122.671
ENSCSAG00000002099	LMNA	lamin A/C	1625.3	0.239906	0.156445	1.53372	0.125098	0.447049	0.125098	0.447049	2111.56	1474.12	1643.54	1271.98
ENSCSAG00000013910	FAM83D		193.896	0.239767	0.178924	1.33985	0.180295	0.528097	0.180295	0.528097	194.467	238.775	138.326	204.015
ENSCSAG00000002516	NAA25	N-alpha-acetyltransferase 25, NatB auxiliary subunit	199.95	0.239673	0.167738	1.42942	0.152883	0.492253	0.152883	0.492253	223.492	219.924	172.703	183.679
ENSCSAG00000003383	RPL27	ribosomal protein L27	1986.58	0.23951	0.125338	1.91101	0.0560029	0.291395	0.0560029	0.291395	2184.13	2160.29	1793.33	1808.58
ENSCSAG00000011190	NRCAM	neuronal cell adhesion molecule	145.011	0.239428	0.181025	1.32263	0.185957	0.535446	0.185957	0.535446	140.771	183.48	115.408	140.383
ENSCSAG00000009054	CPT1A	carnitine palmitoyltransferase 1A	281.98	0.239237	0.158471	1.51014	0.131007	0.456434	0.131007	0.456434	300.408	321.718	257.827	247.967
ENSCSAG00000005286	GTSE1		78.5034	0.239145	0.192092	1.2457	0.212873	0.567858	0.212873	0.567858	92.8798	85.4564	62.2058	73.4716
ENSCSAG00000011871	GNAI1	G protein subunit alpha i1	334.255	0.239083	0.155407	1.5387	0.123879	0.445216	0.123879	0.445216	349.751	387.067	287.292	312.91
ENSCSAG00000008847	SMTN	smoothelin	31.092	0.238958	0.193691	1.2371	0.216051	NA	0.216051	1	40.6349	33.9312	29.4659	20.3359
ENSCSAG00000006472	ZKSCAN2	zinc finger with KRAB and SCAN domains 2	31.0704	0.238921	0.193462	1.23611	0.216417	NA	0.216417	1	43.5374	31.4178	20.4624	28.8638
ENSCSAG00000005251	DDX49	DEAD-box helicase 49	81.6657	0.23866	0.193446	1.23565	0.21659	0.570688	0.21659	0.570688	113.197	72.8893	73.6647	66.9116
ENSCSAG00000011662	MTPAP	mitochondrial poly(A) polymerase	110.656	0.23856	0.185661	1.28556	0.198597	0.553667	0.198597	0.553667	132.064	116.874	86.7607	106.927
ENSCSAG00000010695	SNTB1	syntrophin beta 1	82.0676	0.23838	0.191044	1.24842	0.211877	0.567337	0.211877	0.567337	92.8798	92.9966	66.2982	76.0956
ENSCSAG00000017801	HRH4		13.2243	0.238189	0.168425	1.42198	0.155033	NA	0.155033	1	18.8662	16.3372	9.82196	7.87196
ENSCSAG00000006117	SPATS2	spermatogenesis associated serine rich 2	313.117	0.238155	0.155775	1.52932	0.126185	0.448552	0.126185	0.448552	336.689	353.136	289.748	272.895
ENSCSAG00000012801	RBM25	RNA binding motif protein 25	157.191	0.238132	0.178086	1.33823	0.180821	0.528097	0.180821	0.528097	174.15	175.94	157.97	120.703
ENSCSAG00000005028	SELENOO		103.362	0.237894	0.192088	1.24053	0.214778	0.569625	0.214778	0.569625	146.576	87.9698	101.494	77.4076
ENSCSAG00000010245	POT1	protection of telomeres 1	115.566	0.237845	0.18564	1.28126	0.200103	0.556008	0.200103	0.556008	117.551	142.008	89.2162	113.487
ENSCSAG00000001326	MYSM1	Myb like, SWIRM and MPN domains 1	77.5599	0.237759	0.191967	1.23922	0.215265	0.569625	0.215265	0.569625	82.7211	92.9966	66.2982	68.2236
ENSCSAG00000015215	ATP6V1B1	ATPase H+ transporting V1 subunit B1	10.7885	0.237721	0.156609	1.53111	0.125743	NA	0.125743	1	20.3175	10.0537	4.91098	7.87196
ENSCSAG00000013686	ANGPTL2	angiopoietin like 2	42.72	0.237448	0.197099	1.20633	0.22769	NA	0.22769	1	49.3424	50.2684	38.4694	32.7998
ENSCSAG00000014896	ZMYND8	zinc finger MYND-type containing 8	221.261	0.237395	0.16761	1.41678	0.156548	0.495889	0.156548	0.495889	220.59	268.936	204.624	190.895
ENSCSAG00000013002	MINK1	misshapen like kinase 1	174.078	0.237389	0.173115	1.37227	0.16998	0.51722	0.16998	0.51722	203.175	183.48	165.336	144.319
ENSCSAG00000012043	FAM81A	family with sequence similarity 81 member A	20.894	0.237387	0.183777	1.29582	0.195039	NA	0.195039	1	23.22	28.9044	19.6439	11.8079
ENSCSAG00000004114	UTP4		189.546	0.237315	0.177168	1.33938	0.180447	0.528097	0.180447	0.528097	188.662	233.748	141.6	194.175
ENSCSAG00000010072	ZNF263	zinc finger protein 263	46.5934	0.237299	0.197162	1.20376	0.228681	NA	0.228681	1	47.8912	60.3221	36.8324	41.3278
ENSCSAG00000009772	UBE2E2		49.3549	0.237266	0.196774	1.20448	0.228404	NA	0.228404	1	37.7324	77.9161	35.1954	46.5758
ENSCSAG00000018003	MTMR6	myotubularin related protein 6	159.968	0.237201	0.178237	1.33087	0.183232	0.531498	0.183232	0.531498	156.735	199.817	128.504	154.815
ENSCSAG00000010270	PARD3B	par-3 family cell polarity regulator beta	71.6577	0.237198	0.19316	1.22893	0.219099	NA	0.219099	1	79.8186	82.9429	62.2058	61.6637
ENSCSAG00000011730	SNW1	SNW domain containing 1	198.27	0.23707	0.172004	1.37912	0.167857	0.513738	0.167857	0.513738	249.615	191.02	172.703	179.743
ENSCSAG00000002344	TBX3	T-box transcription factor 3	30.9084	0.236749	0.194188	1.21956	0.222632	NA	0.222632	1	36.2812	37.7013	22.0994	27.5519
ENSCSAG00000008688	KIF3C	kinesin family member 3C	311.375	0.236736	0.159426	1.48562	0.137379	0.468834	0.137379	0.468834	359.909	326.745	303.662	255.183
ENSCSAG00000014395		BAF chromatin remodeling complex subunit BCL11A	49.2526	0.236675	0.197163	1.20084	0.229814	NA	0.229814	1	44.9887	69.1191	44.1988	38.7038
ENSCSAG00000015982	DNAH6	dynein axonemal heavy chain 6	15.6253	0.236391	0.172765	1.37013	0.170646	NA	0.170646	1	13.0612	27.6476	10.6405	11.1519
ENSCSAG00000014980	WDR36		218.571	0.236324	0.167601	1.41033	0.158442	0.498728	0.158442	0.498728	236.553	247.572	177.614	212.543
ENSCSAG00000001085	NCDN	neurochondrin	105.936	0.236269	0.187893	1.25898	0.208037	0.563573	0.208037	0.563573	139.32	99.2802	96.5826	88.5595
ENSCSAG00000009525	CNOT10		153.069	0.236099	0.178315	1.32419	0.185439	0.534745	0.185439	0.534745	153.832	187.25	123.593	147.599
ENSCSAG00000004397			45.1601	0.236098	0.197045	1.19935	0.230392	NA	0.230392	1	43.5374	61.5788	43.3803	32.1438
ENSCSAG00000011595	MITF	melanocyte inducing transcription factor	189.614	0.235836	0.174736	1.34969	0.177115	0.523278	0.177115	0.523278	191.565	229.978	147.329	189.583
ENSCSAG00000014409		elongation factor for RNA polymerase II 2	19.3552	0.235816	0.182598	1.29296	0.196024	NA	0.196024	1	26.1225	22.6208	12.2775	16.3999
ENSCSAG00000006621	MTG1	mitochondrial ribosome associated GTPase 1	124.227	0.235797	0.182912	1.29044	0.196896	0.552024	0.196896	0.552024	150.93	126.928	118.682	100.367
ENSCSAG00000006407	CC2D1A	coiled-coil and C2 domain containing 1A	95.2158	0.235744	0.190134	1.24164	0.214368	0.569625	0.214368	0.569625	121.905	92.9966	92.4901	73.4716
ENSCSAG00000011622	SRF	serum response factor	126.847	0.235678	0.182601	1.29166	0.196473	0.551354	0.196473	0.551354	159.637	124.414	107.223	116.111
ENSCSAG00000004163	WWP2	WW domain containing E3 ubiquitin protein ligase 2	185.196	0.23566	0.172232	1.36922	0.17093	0.517661	0.17093	0.517661	226.395	184.737	170.247	159.407
ENSCSAG00000016773	HMGCS1	3-hydroxy-3-methylglutaryl-CoA synthase 1	184.619	0.235557	0.172171	1.36842	0.17118	0.517661	0.17118	0.517661	185.76	223.695	157.151	171.871
ENSCSAG00000012682	RGL1		174.347	0.23524	0.17316	1.3589	0.17418	0.520251	0.17418	0.520251	175.601	211.127	153.877	156.783
ENSCSAG00000005673	HAUS8	HAUS augmin like complex subunit 8	102.471	0.234898	0.186303	1.26204	0.206933	0.562653	0.206933	0.562653	121.905	108.077	93.3086	86.5915
ENSCSAG00000013274	PHF14	PHD finger protein 14	248.88	0.234895	0.165094	1.42344	0.15461	0.493068	0.15461	0.493068	264.127	285.273	244.731	201.391
ENSCSAG00000007174	STXBP5L	syntaxin binding protein 5 like	76.5114	0.234704	0.192986	1.2179	0.223263	0.57759	0.223263	0.57759	94.3311	79.1728	72.8462	59.6957
ENSCSAG00000008331	ACTN3	actinin alpha 3	8.45055	0.234679	0.14527	1.64565	0.0998363	NA	0.0998363	1	17.415	7.54027	4.91098	3.93598
ENSCSAG00000001062	YARS1	tyrosyl-tRNA synthetase 1	464.037	0.234381	0.153728	1.5252	0.12721	0.450351	0.12721	0.450351	552.925	467.497	455.903	379.822
ENSCSAG00000009598	JAG2	jagged canonical Notch ligand 2	54.0237	0.234329	0.197163	1.19168	0.233388	NA	0.233388	1	72.5624	52.7819	57.2948	33.4558
ENSCSAG00000010490	PARG	poly(ADP-ribose) glycohydrolase	234.647	0.234257	0.168102	1.39367	0.163417	0.507691	0.163417	0.507691	246.712	272.706	184.98	234.191
ENSCSAG00000011222	NCLN	nicalin	181.112	0.234218	0.174196	1.34561	0.17843	0.525128	0.17843	0.525128	226.395	175.94	168.61	153.503
ENSCSAG00000004690	USO1	USO1 vesicle transport factor	296.697	0.234112	0.15841	1.47818	0.139359	0.472048	0.139359	0.472048	320.726	333.028	249.642	283.391
ENSCSAG00000014718	ADGRV1	adhesion G protein-coupled receptor V1	152.343	0.234112	0.17836	1.31284	0.189237	0.541063	0.189237	0.541063	146.576	192.277	133.415	137.103
ENSCSAG00000001495	DPYD	dihydropyrimidine dehydrogenase	547.102	0.233982	0.154072	1.51876	0.128822	0.452169	0.128822	0.452169	512.29	689.934	506.65	479.533
ENSCSAG00000004128	RAP1GDS1	Rap1 GTPase-GDP dissociation stimulator 1	134.374	0.233801	0.178934	1.30734	0.191097	0.54314	0.191097	0.54314	152.381	147.035	115.408	122.671
ENSCSAG00000011187			6.57623	0.23367	0.135363	1.7678	0.0770949	NA	0.0770949	1	11.61	8.79698	3.27399	2.62399
ENSCSAG00000003443	DHX8		297.148	0.233631	0.156633	1.492	0.135698	0.464492	0.135698	0.464492	322.177	331.772	264.374	270.271
ENSCSAG00000008171	LLGL1	LLGL scribble cell polarity complex component 1	239.418	0.233585	0.165896	1.40883	0.158885	0.499267	0.158885	0.499267	291.701	237.518	221.813	206.639
ENSCSAG00000002719	TCHP	trichoplein keratin filament binding	48.22	0.233421	0.197125	1.18548	0.235827	NA	0.235827	1	46.4399	65.349	48.2913	32.7998
ENSCSAG00000010961	GABPB1	GA binding protein transcription factor subunit beta 1	115.064	0.233418	0.183754	1.27069	0.203838	0.560794	0.203838	0.560794	119.002	138.238	97.4011	105.615
ENSCSAG00000004641	NUP54	nucleoporin 54	115.869	0.233231	0.186116	1.25314	0.210154	0.564422	0.210154	0.564422	120.454	139.495	86.7607	116.767
ENSCSAG00000010548	CEP152	centrosomal protein 152	44.7287	0.23323	0.197116	1.18387	0.236466	NA	0.236466	1	56.5986	47.755	31.9214	42.6398
ENSCSAG00000012501	CDK14	cyclin dependent kinase 14	318.737	0.233195	0.161149	1.44719	0.147844	0.484646	0.147844	0.484646	307.664	394.607	274.196	298.478
ENSCSAG00000007395	DAPK1	death associated protein kinase 1	632.145	0.233187	0.141069	1.65328	0.0982733	0.39183	0.0982733	0.39183	676.281	707.528	595.047	549.725
ENSCSAG00000014737			35.017	0.233181	0.194961	1.19544	0.231914	NA	0.231914	1	40.6349	42.7282	21.2809	35.4238
ENSCSAG00000009698	MLLT1	MLLT1 super elongation complex subunit	273.902	0.233158	0.162011	1.43987	0.149903	0.486707	0.149903	0.486707	313.469	290.3	266.83	225.007
ENSCSAG00000013500	JPH1	junctophilin 1	37.7765	0.233137	0.195396	1.19204	0.233246	NA	0.233246	1	40.6349	49.0117	22.0994	39.3598
ENSCSAG00000007038	PRKG1		68.4018	0.233057	0.19415	1.20114	0.229698	NA	0.229698	1	71.1111	84.1997	60.5688	57.7277
ENSCSAG00000014041		eukaryotic translation elongation factor 1 alpha 1	6420.99	0.232939	0.127667	1.82461	0.0680605	0.322661	0.0680605	0.322661	6604.63	7410.83	5483.11	6185.39
ENSCSAG00000013197	HDAC6	histone deacetylase 6	132.357	0.232821	0.180231	1.2929	0.196046	0.550599	0.196046	0.550599	156.735	138.238	123.593	110.863
ENSCSAG00000012225	PDE10A		69.9126	0.232802	0.19429	1.19836	0.230778	NA	0.230778	1	69.6599	89.2265	56.4763	64.2877
ENSCSAG00000008594	MCU		301.16	0.232752	0.156176	1.49076	0.136024	0.465376	0.136024	0.465376	329.433	333.028	269.285	272.895
ENSCSAG00000016857	MFHAS1	malignant fibrous histiocytoma amplified sequence 1	111.008	0.232719	0.184356	1.26308	0.206561	0.562398	0.206561	0.562398	129.161	119.388	92.4901	102.991
ENSCSAG00000017844	COG6		87.2366	0.232708	0.191601	1.21454	0.224541	0.578151	0.224541	0.578151	81.2698	115.617	72.0277	80.0316
ENSCSAG00000004040	GNA13	G protein subunit alpha 13	128.878	0.232657	0.183338	1.26923	0.204358	0.560794	0.204358	0.560794	120.454	167.143	113.771	114.143
ENSCSAG00000013590			553.122	0.23241	0.143002	1.62558	0.104039	0.405342	0.104039	0.405342	618.231	593.168	515.653	485.437
ENSCSAG00000015908		splicing regulatory glutamic acid and lysine rich protein 1	254.192	0.232378	0.161949	1.43522	0.151226	0.489403	0.151226	0.489403	271.383	289.044	216.902	239.439
ENSCSAG00000011632	SEL1L		520.973	0.232352	0.145461	1.59755	0.110143	0.415826	0.110143	0.415826	560.181	581.857	445.262	496.589
ENSCSAG00000015783	TNS3	tensin-3	1918.13	0.232223	0.12643	1.83685	0.0662325	0.319645	0.0662325	0.319645	2041.9	2142.69	1718.02	1769.88
ENSCSAG00000003399			279.315	0.231996	0.159538	1.45471	0.145748	0.480588	0.145748	0.480588	325.079	290.3	244.731	257.151
ENSCSAG00000008626	P4HA1	prolyl 4-hydroxylase subunit alpha 1	352.18	0.231908	0.158266	1.46544	0.1428	0.477305	0.1428	0.477305	341.043	433.565	309.392	324.718
ENSCSAG00000009473	TBC1D10A	TBC1 domain family member 10A	80.0626	0.231848	0.191263	1.21331	0.225012	0.578383	0.225012	0.578383	91.4286	89.2265	72.0277	67.5676
ENSCSAG00000002965	DHX34		55.0876	0.231636	0.196738	1.17933	0.238268	NA	0.238268	1	74.0136	52.7819	48.2913	45.2638
ENSCSAG00000009888		EKC/KEOPS complex subunit LAGE3-like	92.2581	0.231525	0.188274	1.23058	0.218478	0.572874	0.218478	0.572874	101.587	105.564	81.8497	80.0316
ENSCSAG00000001531	PRPF38B	pre-mRNA processing factor 38B	143.923	0.231491	0.177379	1.30555	0.191705	0.544438	0.191705	0.544438	155.283	164.629	121.956	133.823
ENSCSAG00000010287	PIGO	phosphatidylinositol glycan anchor biosynthesis class O	170.405	0.231487	0.173699	1.33365	0.182318	0.530168	0.182318	0.530168	203.175	174.683	158.788	144.975
ENSCSAG00000002892	SIK2		128.289	0.231443	0.183903	1.2585	0.208212	0.563573	0.208212	0.563573	121.905	164.629	103.949	122.671
ENSCSAG00000004431	HAUS5	HAUS augmin like complex subunit 5	64.9054	0.231345	0.195957	1.18175	0.237303	NA	0.237303	1	88.5261	60.3221	49.1098	61.6637
ENSCSAG00000019631			16.0992	0.23133	0.176102	1.31483	0.188566	NA	0.188566	1	17.415	23.8775	10.6405	12.4639
ENSCSAG00000006735	ABCB8	ATP binding cassette subfamily B member 8	30.1858	0.231167	0.193425	1.19805	0.230897	NA	0.230897	1	42.0862	30.1611	26.1919	22.3039
ENSCSAG00000011865			8.11812	0.231062	0.145178	1.60973	0.107457	NA	0.107457	1	8.70748	15.0805	4.09248	4.59198
ENSCSAG00000019503		60S ribosomal protein L23	12.4378	0.23095	0.16514	1.40143	0.161087	NA	0.161087	1	14.5125	18.8507	6.54797	9.83995
ENSCSAG00000012842	PARP16		58.7426	0.23076	0.196074	1.1784	0.238636	NA	0.238636	1	75.4649	59.0654	49.9283	50.5117
ENSCSAG00000011926	REXO1	RNA exonuclease 1 homolog	147.7	0.230636	0.176534	1.30717	0.191156	0.54314	0.191156	0.54314	169.796	158.346	126.867	135.791
ENSCSAG00000014998	GAD1	glutamate decarboxylase 1	10.2863	0.23048	0.156819	1.48378	0.137868	NA	0.137868	1	15.9637	12.5671	7.36647	5.24797
ENSCSAG00000005326	SH3PXD2A		69.6049	0.230423	0.193997	1.18821	0.234752	NA	0.234752	1	71.1111	86.7131	58.9318	61.6637
ENSCSAG00000013299	PI4KA	phosphatidylinositol 4-kinase alpha	157.919	0.230395	0.182426	1.26315	0.206535	0.562398	0.206535	0.562398	137.868	213.641	148.966	131.199
ENSCSAG00000006425	BRME1	break repair meiotic recombinase recruitment factor 1	24.0238	0.230264	0.188183	1.22699	0.219827	NA	0.219827	1	36.2812	22.6208	18.8254	18.3679
ENSCSAG00000006636	GANAB		1596.93	0.230193	0.130049	1.7702	0.0766934	0.345348	0.0766934	0.345348	1802.45	1681.48	1511.76	1392.02
ENSCSAG00000005431	PDHX	pyruvate dehydrogenase complex component X	168.544	0.230191	0.175841	1.30928	0.19044	0.54314	0.19044	0.54314	162.54	211.127	145.692	154.815
ENSCSAG00000005248			79.6737	0.230036	0.193287	1.18992	0.234078	0.589171	0.234078	0.589171	81.2698	99.2802	58.1133	80.0316
ENSCSAG00000008486			21.3694	0.229951	0.186194	1.23709	0.216054	NA	0.216054	1	27.5737	25.1342	16.3699	16.3999
ENSCSAG00000017988	EPHB4	EPH receptor B4	98.0552	0.229889	0.192415	1.1968	0.231385	0.58746	0.231385	0.58746	134.966	86.7131	99.0381	71.5036
ENSCSAG00000011534	RPS14	ribosomal protein S14	3541.39	0.229858	0.13504	1.70224	0.088711	0.37128	0.088711	0.37128	4268.12	3466.01	3386.94	3044.48
ENSCSAG00000016874	TNKS	tankyrase	65.0225	0.229815	0.195419	1.17661	0.239351	NA	0.239351	1	62.4036	85.4564	59.7503	52.4797
ENSCSAG00000013546	EIF2B5	eukaryotic translation initiation factor 2B subunit epsilon	186.897	0.229734	0.172223	1.33488	0.181915	0.529448	0.181915	0.529448	227.846	185.993	174.34	159.407
ENSCSAG00000004987	PDGFRA	platelet derived growth factor receptor alpha	9252.43	0.22965	0.120971	1.8984	0.0576431	0.295812	0.0576431	0.295812	9740.77	10405.6	8242.26	8621.11
ENSCSAG00000014911	MCC	MCC regulator of WNT signaling pathway	72.5304	0.229506	0.194479	1.18119	0.237527	0.593775	0.237527	0.593775	72.5624	91.7399	72.0277	53.7917
ENSCSAG00000013662	TASOR2		290.551	0.229361	0.160498	1.42925	0.152934	0.492253	0.152934	0.492253	297.506	341.825	244.731	278.143
ENSCSAG00000012263	RPS6KL1		31.4891	0.22927	0.190762	1.20707	0.227406	NA	0.227406	1	53.6962	22.6208	28.6474	20.9919
ENSCSAG00000003809	CDC27	cell division cycle 27	535.511	0.229055	0.162716	1.4076	0.15925	0.499267	0.15925	0.499267	500.68	678.624	411.704	551.037
ENSCSAG00000017767	TRRAP	transformation/transcription domain associated protein	1166.68	0.229006	0.134901	1.69767	0.0895709	0.374189	0.0895709	0.374189	1205.99	1340.91	1009.21	1110.6
ENSCSAG00000008843	PARP10	poly(ADP-ribose) polymerase family member 10	30.8844	0.229003	0.194129	1.17997	0.238012	NA	0.238012	1	31.9274	41.4715	24.5549	25.5839
ENSCSAG00000013658	SLX4IP		44.072	0.228794	0.197054	1.1613	0.24552	NA	0.24552	1	53.6962	49.0117	30.2844	43.2958
ENSCSAG00000006720	TAF6L	TATA-box binding protein associated factor 6 like	121.933	0.228774	0.185727	1.2332	0.217502	0.57135	0.217502	0.57135	161.088	111.847	113.771	101.023
ENSCSAG00000015577	GNAS	neuroendocrine secretory protein 55	3828.38	0.22874	0.122175	1.87229	0.0611668	0.305924	0.0611668	0.305924	4089.61	4245.17	3543.27	3435.45
ENSCSAG00000015964	NR4A2	nuclear receptor subfamily 4 group A member 2	4.6512	0.228681	0.113437	2.14302	0.0321116	NA	0.0321116	1	11.61	5.02684	0	1.96799
ENSCSAG00000010499	NEK11	NIMA related kinase 11	18.5511	0.228606	0.181049	1.26374	0.206323	NA	0.206323	1	18.8662	27.6476	13.9144	13.7759
ENSCSAG00000012102	ITCH	itchy E3 ubiquitin protein ligase	354.103	0.228586	0.156047	1.46505	0.142907	0.477429	0.142907	0.477429	351.202	426.025	315.121	324.062
ENSCSAG00000005766	AP1M1	adaptor related protein complex 1 subunit mu 1	261.744	0.228537	0.163747	1.39639	0.162598	0.506043	0.162598	0.506043	319.274	257.626	239.82	230.255
ENSCSAG00000017010	CCDC138	coiled-coil domain containing 138	76.5245	0.228522	0.192057	1.19091	0.233688	0.589141	0.233688	0.589141	88.5261	84.1997	67.1167	66.2557
ENSCSAG00000009620	TFAP4	transcription factor AP-4	33.2311	0.228418	0.195197	1.17237	0.241047	NA	0.241047	1	42.0862	36.4446	29.4659	24.9279
ENSCSAG00000011653	ERC1	ELKS/RAB6-interacting/CAST family member 1	346.599	0.22835	0.157194	1.45302	0.146217	0.481415	0.146217	0.481415	349.751	410.945	333.128	292.574
ENSCSAG00000009292	POLR3A	RNA polymerase III subunit A	111.513	0.22834	0.185037	1.23447	0.217027	0.571183	0.217027	0.571183	126.259	123.158	88.3977	108.239
ENSCSAG00000008371		structural maintenance of chromosomes 5	208.803	0.228282	0.173424	1.31629	0.188078	0.539539	0.188078	0.539539	204.626	257.626	163.699	209.263
ENSCSAG00000006106	KIF22	kinesin family member 22	151.717	0.228058	0.179667	1.27053	0.203896	0.560794	0.203896	0.560794	179.955	157.089	153.059	116.767
ENSCSAG00000012879			380.262	0.227909	0.167342	1.36266	0.172989	0.518619	0.172989	0.518619	493.424	345.596	382.238	299.79
ENSCSAG00000015082	MSH3		165.447	0.227814	0.175447	1.29869	0.194049	0.547673	0.194049	0.547673	165.442	201.074	139.144	156.127
ENSCSAG00000009102	AHCTF1		417.215	0.227754	0.148193	1.53725	0.124233	0.445216	0.124233	0.445216	458.594	454.929	381.42	373.918
ENSCSAG00000008752	CREB3L2	cAMP responsive element binding protein 3 like 2	56.6249	0.227705	0.196896	1.158	0.246866	NA	0.246866	1	58.0499	71.6325	58.1133	38.7038
ENSCSAG00000002354	ZNF473	zinc finger protein 473	139.98	0.227592	0.178276	1.27738	0.201467	0.558499	0.201467	0.558499	163.991	147.035	120.319	128.575
ENSCSAG00000012371	ANKAR	ankyrin and armadillo repeat containing	10.8936	0.227543	0.155073	1.47242	0.140907	NA	0.140907	1	11.61	18.8507	3.27399	9.83995
ENSCSAG00000006554		actin related protein 3B	36.4869	0.227499	0.196191	1.16008	0.246018	NA	0.246018	1	37.7324	47.755	30.2844	30.1758
ENSCSAG00000005371	ADCY7		303.377	0.227295	0.167964	1.35404	0.175722	0.521436	0.175722	0.521436	391.837	277.733	294.659	249.279
ENSCSAG00000013957	NEO1	neogenin 1	581.091	0.227023	0.141196	1.6081	0.107813	0.412508	0.107813	0.412508	629.841	639.666	528.749	526.109
ENSCSAG00000017228	LATS1	large tumor suppressor kinase 1	102.541	0.226815	0.191259	1.18543	0.235848	0.591309	0.235848	0.591309	89.9773	140.752	77.7572	101.679
ENSCSAG00000006864	L1CAM	L1 cell adhesion molecule	30.8343	0.226724	0.193672	1.17174	0.241303	NA	0.241303	1	30.4762	42.7282	27.8289	22.3039
ENSCSAG00000013351	TGFBI	transforming growth factor beta induced	72.432	0.226364	0.193296	1.17247	0.241009	0.597926	0.241009	0.597926	87.0748	76.6594	66.2982	59.6957
ENSCSAG00000012015	RNF111	ring finger protein 111	122.386	0.226278	0.192065	1.1774	0.239034	0.594973	0.239034	0.594973	97.2336	178.453	89.2162	124.639
ENSCSAG00000000850	ARHGEF19	Rho guanine nucleotide exchange factor 19	38.5073	0.226217	0.195254	1.16178	0.245323	NA	0.245323	1	60.9524	30.1611	32.7399	30.1758
ENSCSAG00000013233			1051.52	0.226187	0.141369	1.60002	0.109595	0.415365	0.109595	0.415365	1105.85	1191.36	855.329	1053.53
ENSCSAG00000005096	GATAD2A	GATA zinc finger domain containing 2A	406.097	0.226109	0.149875	1.50908	0.131279	0.456698	0.131279	0.456698	465.85	423.512	368.324	366.702
ENSCSAG00000009384	ANXA11	annexin A11	380.758	0.226064	0.151279	1.49465	0.135005	0.462585	0.135005	0.462585	397.642	436.079	346.224	343.086
ENSCSAG00000013017	ACTL6A	actin like 6A	178.074	0.226041	0.172959	1.30716	0.191158	0.54314	0.191158	0.54314	179.955	213.641	151.422	167.279
ENSCSAG00000014280	YTHDF3	YTH N6-methyladenosine RNA binding protein 3	258.267	0.225979	0.166848	1.35444	0.175595	0.521436	0.175595	0.521436	251.066	317.948	212.809	251.247
ENSCSAG00000001600	MOV10	Mov10 RISC complex RNA helicase	160.989	0.225915	0.174342	1.29666	0.194747	0.548628	0.194747	0.548628	181.406	174.683	151.422	136.447
ENSCSAG00000009267	DLG5	discs large MAGUK scaffold protein 5	1096.3	0.225725	0.134432	1.6793	0.0930938	0.380365	0.0930938	0.380365	1205.99	1183.82	1056.68	938.731
ENSCSAG00000008215	ABCF1		248.626	0.225583	0.16417	1.37481	0.169192	0.515776	0.169192	0.515776	282.993	263.909	242.275	205.327
ENSCSAG00000014804	ETAA1	ETAA1 activator of ATR kinase	105.17	0.225477	0.185576	1.21553	0.224165	0.578057	0.224165	0.578057	110.295	124.414	90.8531	95.1195
ENSCSAG00000006204	IQCA1		19.4843	0.225452	0.1787	1.26012	0.207626	NA	0.207626	1	21.7687	27.6476	8.18497	20.3359
ENSCSAG00000010200	CENPI	centromere protein I	157.188	0.225412	0.177684	1.26932	0.204326	0.560794	0.204326	0.560794	194.467	154.575	130.141	149.567
ENSCSAG00000003227	CFAP300	cilia and flagella associated protein 300	7.27505	0.225276	0.138396	1.65669	0.0975815	NA	0.0975815	1	14.5125	7.54027	2.45549	4.59198
ENSCSAG00000017471	IRS2		66.905	0.225006	0.194803	1.15528	0.247975	NA	0.247975	1	74.0136	77.9161	50.7468	64.9437
ENSCSAG00000007451	GCNT2		251.022	0.224706	0.194362	1.15873	0.246567	0.604766	0.246567	0.604766	391.837	203.587	191.528	217.135
ENSCSAG00000015911	NOP9	NOP9 nucleolar protein	67.7344	0.224655	0.196092	1.14806	0.250943	NA	0.250943	1	92.8798	61.5788	67.9352	48.5437
ENSCSAG00000017568	MTCL1		125.029	0.224639	0.183184	1.22756	0.21961	0.574347	0.21961	0.574347	155.283	123.158	118.682	102.991
ENSCSAG00000016310	IMMT		241.749	0.22461	0.162289	1.38459	0.166176	0.510886	0.166176	0.510886	269.932	261.396	221.813	213.855
ENSCSAG00000008245	PIK3C2G		93.6956	0.224429	0.189189	1.1877	0.234953	0.589976	0.234953	0.589976	113.197	96.7668	90.0347	74.7836
ENSCSAG00000002872	SELPLG		6.43033	0.224416	0.133825	1.71406	0.086517	NA	0.086517	1	7.25624	12.5671	3.27399	2.62399
ENSCSAG00000017262	ZNF622	zinc finger protein 622	138.022	0.224326	0.181031	1.24008	0.214947	0.569625	0.214947	0.569625	146.576	159.602	138.326	107.583
ENSCSAG00000002132	CLIP1		290.09	0.224068	0.157592	1.42227	0.154947	0.493068	0.154947	0.493068	310.567	325.488	268.467	255.839
ENSCSAG00000015679	ESRRG	estrogen related receptor gamma	169.341	0.224008	0.178686	1.25359	0.209991	0.564422	0.209991	0.564422	155.283	219.924	140.781	161.375
ENSCSAG00000008828	JAK2	Janus kinase 2	295.227	0.223894	0.181495	1.24168	0.214353	0.569625	0.214353	0.569625	288.798	449.903	142.418	299.79
ENSCSAG00000014744	PRDM1	PR/SET domain 1	6.91278	0.223777	0.130137	1.77716	0.0755421	NA	0.0755421	1	2.90249	18.8507	3.27399	2.62399
ENSCSAG00000002338	GAA	alpha glucosidase	128.696	0.223734	0.181504	1.23343	0.217417	0.571348	0.217417	0.571348	133.515	152.062	123.593	105.615
ENSCSAG00000018237	ZNF516	zinc finger protein 516	63.9677	0.223492	0.19636	1.14057	0.25405	NA	0.25405	1	85.6236	60.3221	64.6612	45.2638
ENSCSAG00000011135	KIZ		32.4947	0.22348	0.194786	1.14763	0.251123	NA	0.251123	1	39.1837	37.7013	22.9179	30.1758
ENSCSAG00000005907	GBE1	1,4-alpha-glucan branching enzyme 1	167.272	0.223446	0.173708	1.28671	0.198196	0.553457	0.198196	0.553457	179.955	189.763	139.963	159.407
ENSCSAG00000015093	OFD1		159.812	0.223255	0.177313	1.25925	0.207939	0.563573	0.207939	0.563573	153.832	199.817	136.689	148.911
ENSCSAG00000016255	FYCO1	FYVE and coiled-coil domain autophagy adaptor 1	243.967	0.223223	0.161861	1.3796	0.16771	0.513518	0.16771	0.513518	265.578	270.193	220.994	219.103
ENSCSAG00000017019	RANBP2		662.928	0.223192	0.140773	1.58562	0.112825	0.421519	0.112825	0.421519	690.794	755.283	584.407	621.229
ENSCSAG00000017214	TAB2	TGF-beta activated kinase 1 (MAP3K7) binding protein 2	287.763	0.22294	0.168773	1.32086	0.186547	0.536514	0.186547	0.536514	287.347	346.852	217.72	299.134
ENSCSAG00000016433	MGAT5	alpha-1,6-mannosylglycoprotein 6-beta-N-acetylglucosaminyltransferase	130.211	0.222911	0.179954	1.23936	0.215212	0.569625	0.215212	0.569625	137.868	150.805	118.682	113.487
ENSCSAG00000002242		calcium binding protein 1	19.6817	0.222849	0.183595	1.21651	0.223791	NA	0.223791	1	26.1225	22.6208	15.5514	14.4319
ENSCSAG00000007161	MTM1		43.4073	0.222793	0.196987	1.1308	0.258139	NA	0.258139	1	49.3424	51.5252	29.4659	43.2958
ENSCSAG00000009290	CDHR2	cadherin related family member 2	31.1377	0.222764	0.194397	1.14651	0.251584	NA	0.251584	1	33.3787	40.2148	25.3734	25.5839
ENSCSAG00000012255	WDR24	WD repeat domain 24	65.8877	0.222762	0.195199	1.14303	0.253028	NA	0.253028	1	84.1723	65.349	62.2058	51.8237
ENSCSAG00000010139	SLIT3		592.778	0.222633	0.143272	1.55413	0.120153	0.438177	0.120153	0.438177	609.524	683.651	552.485	525.453
ENSCSAG00000009685	SLC4A7		217.761	0.222487	0.165809	1.34222	0.179526	0.52672	0.179526	0.52672	236.553	242.545	186.617	205.327
ENSCSAG00000012146	STAT4	signal transducer and activator of transcription 4	298.639	0.222485	0.172542	1.28926	0.197306	0.552628	0.197306	0.552628	287.347	371.987	217.72	317.502
ENSCSAG00000018434		60S ribosomal protein L26-like	69.7796	0.222388	0.197152	1.13039	0.258311	NA	0.258311	1	114.649	46.4983	58.9318	59.0397
ENSCSAG00000017849	AP4M1	adaptor related protein complex 4 subunit mu 1	50.8847	0.22238	0.196912	1.12974	0.258584	NA	0.258584	1	53.6962	62.8356	41.7433	45.2638
ENSCSAG00000004775	SLC7A9		8.37138	0.222272	0.14747	1.52223	0.127951	NA	0.127951	1	10.1587	13.8238	4.91098	4.59198
ENSCSAG00000011656	GTF2A1	general transcription factor IIA subunit 1	528.979	0.222206	0.162034	1.37128	0.170289	0.517661	0.170289	0.517661	529.705	632.126	391.241	562.845
ENSCSAG00000014611	TGS1		74.1633	0.222088	0.193222	1.14961	0.250305	0.607326	0.250305	0.607326	75.4649	91.7399	60.5688	68.8796
ENSCSAG00000010977	DBR1	debranching RNA lariats 1	108.092	0.222064	0.186129	1.19436	0.232336	0.588448	0.232336	0.588448	129.161	111.847	104.768	86.5915
ENSCSAG00000009831	RAB5A	RAB5A, member RAS oncogene family	71.0685	0.22206	0.193522	1.14866	0.250697	NA	0.250697	1	79.8186	80.4295	66.2982	57.7277
ENSCSAG00000015717	NACAD		12.858	0.221688	0.161013	1.39437	0.163205	NA	0.163205	1	24.6712	10.0537	11.459	5.24797
ENSCSAG00000009522	BOD1		109.641	0.221532	0.186476	1.18818	0.234761	0.589976	0.234761	0.589976	120.454	124.414	83.4867	110.207
ENSCSAG00000018109	VPS45	vacuolar protein sorting 45 homolog	73.4239	0.221482	0.193556	1.14443	0.252446	0.60907	0.252446	0.60907	72.5624	92.9966	60.5688	67.5676
ENSCSAG00000007198	WRNIP1	WRN helicase interacting protein 1	141.165	0.221419	0.178617	1.24063	0.214741	0.569625	0.214741	0.569625	166.893	145.779	132.596	119.391
ENSCSAG00000005799	KRT7	keratin 7	1812.47	0.221357	0.152187	1.45469	0.145754	0.480588	0.145754	0.480588	2281.36	1682.74	1849.8	1435.98
ENSCSAG00000015242	NFATC2		12.1707	0.221307	0.164488	1.35353	0.175885	NA	0.175885	1	15.9637	16.3372	9.82196	6.55997
ENSCSAG00000013898	RAPGEF5		158.919	0.221294	0.177741	1.24518	0.213067	0.567858	0.213067	0.567858	169.796	182.223	123.593	160.063
ENSCSAG00000013643	GAPVD1	GTPase activating protein and VPS9 domains 1	314.096	0.221282	0.157219	1.40798	0.159137	0.499267	0.159137	0.499267	339.592	348.109	303.662	265.023
ENSCSAG00000001046	TXLNA	taxilin alpha	192.719	0.221271	0.174838	1.26661	0.205293	0.561945	0.205293	0.561945	242.358	183.48	188.254	156.783
ENSCSAG00000004779	MMP15	matrix metallopeptidase 15	74.3992	0.221224	0.192654	1.14947	0.250364	0.607326	0.250364	0.607326	87.0748	80.4295	67.1167	62.9757
ENSCSAG00000000926	E2F2	E2F transcription factor 2	12.9102	0.221164	0.167299	1.32894	0.183868	NA	0.183868	1	18.8662	15.0805	9.82196	7.87196
ENSCSAG00000012251	MIDN	midnolin	398.07	0.221075	0.14966	1.47747	0.139549	0.472243	0.139549	0.472243	422.313	447.389	358.502	364.078
ENSCSAG00000003422	ZNF827	zinc finger protein 827	142.987	0.220921	0.177147	1.24768	0.212149	0.567337	0.212149	0.567337	156.735	159.602	124.412	131.199
ENSCSAG00000006001	ADSL		100.112	0.220822	0.187488	1.17908	0.238366	0.594311	0.238366	0.594311	120.454	103.05	94.9456	81.9996
ENSCSAG00000011661	DNM3	dynamin 3	24.2421	0.220811	0.186295	1.18344	0.236635	NA	0.236635	1	20.3175	38.958	14.7329	22.9599
ENSCSAG00000010733	MELK	maternal embryonic leucine zipper kinase	83.6479	0.220706	0.190852	1.15678	0.247361	0.605488	0.247361	0.605488	87.0748	100.537	69.5722	77.4076
ENSCSAG00000015834	GSR		681.811	0.220676	0.139047	1.58725	0.112457	0.420839	0.112457	0.420839	741.587	743.973	600.777	640.909
ENSCSAG00000008423	RAI1	retinoic acid induced 1	350.342	0.220407	0.159418	1.38318	0.16661	0.511616	0.16661	0.511616	400.544	366.96	354.409	279.455
ENSCSAG00000005483		mitogen-activated protein kinase kinase kinase 12	55.8197	0.220371	0.196595	1.12281	0.26152	NA	0.26152	1	68.2086	59.0654	54.0208	41.9838
ENSCSAG00000006388	IL27RA		96.5611	0.22027	0.19025	1.15944	0.246276	0.604567	0.246276	0.604567	123.356	92.9966	95.7641	74.1276
ENSCSAG00000013430	SCAF8	SR-related CTD associated factor 8	172.406	0.220221	0.179921	1.2238	0.221028	0.575957	0.221028	0.575957	158.186	223.695	135.87	171.871
ENSCSAG00000003414	SLC10A7		15.1835	0.220219	0.174264	1.26641	0.205366	NA	0.205366	1	17.415	21.3641	11.459	10.4959
ENSCSAG00000008640	PNPLA6	patatin like phospholipase domain containing 6	145.047	0.220123	0.178026	1.23745	0.215918	0.569625	0.215918	0.569625	172.698	148.292	135.87	123.327
ENSCSAG00000002850	UNG		234.044	0.220084	0.165152	1.33334	0.18242	0.530239	0.18242	0.530239	272.834	241.289	222.631	199.423
ENSCSAG00000002379	SPA17		30.4325	0.219899	0.1937	1.13731	0.255409	NA	0.255409	1	42.0862	30.1611	24.5549	24.9279
ENSCSAG00000017761	LCP1	lymphocyte cytosolic protein 1	74.4899	0.21989	0.19265	1.14245	0.253269	0.60907	0.253269	0.60907	88.5261	79.1728	64.6612	65.5997
ENSCSAG00000008307	TBC1D9B	TBC1 domain family member 9B	487.144	0.219878	0.149147	1.47468	0.140298	0.472662	0.140298	0.472662	567.438	496.401	468.18	416.558
ENSCSAG00000012823	NCEH1	neutral cholesterol ester hydrolase 1	94.3512	0.219705	0.190761	1.15185	0.249384	0.607172	0.249384	0.607172	84.1723	126.928	84.3052	81.9996
ENSCSAG00000009656			178.412	0.219703	0.173571	1.26666	0.205275	0.561945	0.205275	0.561945	219.138	174.683	163.699	156.127
ENSCSAG00000012143			14.8592	0.21964	0.172629	1.27752	0.201419	NA	0.201419	1	23.22	15.0805	10.6405	10.4959
ENSCSAG00000012275	PDE12	phosphodiesterase 12	90.9978	0.21949	0.190387	1.15294	0.248935	0.606947	0.248935	0.606947	97.2336	106.82	68.7537	91.1835
ENSCSAG00000006327	ATP2A1	ATPase sarcoplasmic/endoplasmic reticulum Ca2+ transporting 1	4.10837	0.219404	0.109411	2.16546	0.0303521	NA	0.0303521	1	7.25624	7.54027	1.63699	0
ENSCSAG00000000483			185.822	0.219404	0.174332	1.2592	0.207959	0.563573	0.207959	0.563573	232.2	178.453	155.514	177.119
ENSCSAG00000001439	SH3GLB1	SH3 domain containing GRB2 like, endophilin B1	164.181	0.219099	0.173634	1.26253	0.206757	0.562398	0.206757	0.562398	190.113	172.169	144.874	149.567
ENSCSAG00000000698			68.0021	0.219014	0.193963	1.12996	0.258495	NA	0.258495	1	75.4649	77.9161	58.9318	59.6957
ENSCSAG00000017197	SASH1		54.61	0.218976	0.19675	1.11487	0.264907	NA	0.264907	1	66.7574	57.8087	53.2023	40.6718
ENSCSAG00000008223	PELI3	pellino E3 ubiquitin protein ligase family member 3	71.8226	0.218904	0.195212	1.12341	0.261263	NA	0.261263	1	98.6848	64.0923	68.7537	55.7597
ENSCSAG00000001624			69.9918	0.218868	0.193528	1.13183	0.257706	NA	0.257706	1	79.8186	77.9161	60.5688	61.6637
ENSCSAG00000011561	PGAP1	post-GPI attachment to proteins inositol deacylase 1	93.3917	0.218805	0.19269	1.13511	0.256331	0.612287	0.256331	0.612287	97.2336	113.104	62.2058	101.023
ENSCSAG00000003249	TOMM40	translocase of outer mitochondrial membrane 40	372.235	0.218758	0.162898	1.34347	0.17912	0.526026	0.17912	0.526026	480.363	336.799	337.221	334.558
ENSCSAG00000017914	AGFG2	ArfGAP with FG repeats 2	32.187	0.218584	0.194883	1.12283	0.26151	NA	0.26151	1	40.6349	35.1879	25.3734	27.5519
ENSCSAG00000014919	RPS23	ribosomal protein S23	361.342	0.218466	0.159112	1.37315	0.169707	0.516619	0.169707	0.516619	394.739	397.121	284.837	368.67
ENSCSAG00000008357	ADAMTS14	ADAM metallopeptidase with thrombospondin type 1 motif 14	21.712	0.218462	0.186098	1.17704	0.23918	NA	0.23918	1	30.4762	22.6208	18.0069	15.7439
ENSCSAG00000010664		TBC1 domain family member 31	316.594	0.218455	0.165126	1.32291	0.185864	0.535446	0.185864	0.535446	298.957	395.864	258.645	312.91
ENSCSAG00000010106	DOCK2	dedicator of cytokinesis 2	33.3886	0.218289	0.195425	1.11813	0.263513	NA	0.263513	1	40.6349	37.7013	27.0104	28.2079
ENSCSAG00000012727	SLC2A2	solute carrier family 2 member 2	19.8922	0.218278	0.180182	1.21617	0.223919	NA	0.223919	1	34.8299	15.0805	13.9144	15.7439
ENSCSAG00000012921		sperm associated antigen 7	11.1005	0.218128	0.16048	1.36635	0.171829	NA	0.171829	1	17.415	12.5671	6.54797	7.87196
ENSCSAG00000012152	GPR158		15.1434	0.218122	0.164572	1.33043	0.183376	NA	0.183376	1	7.25624	32.6745	11.459	9.18395
ENSCSAG00000005628	AKAP1	A-kinase anchoring protein 1	135.129	0.21812	0.179543	1.21567	0.224112	0.578057	0.224112	0.578057	161.088	138.238	117.864	123.327
ENSCSAG00000014167	TUBA8		91.2632	0.218062	0.188941	1.15477	0.248185	0.606635	0.248185	0.606635	94.3311	109.334	82.6682	78.7196
ENSCSAG00000006595	UTP6	UTP6 small subunit processome component	237.705	0.218035	0.163895	1.33084	0.183243	0.531498	0.183243	0.531498	249.615	271.45	225.087	204.671
ENSCSAG00000018016	SMAD2	SMAD family member 2	118.845	0.217934	0.184824	1.17923	0.238309	0.594311	0.238309	0.594311	113.197	150.805	99.8566	111.519
ENSCSAG00000003438	ANAPC10	anaphase promoting complex subunit 10	59.347	0.217905	0.196494	1.10864	0.267585	NA	0.267585	1	62.4036	72.8893	41.7433	60.3517
ENSCSAG00000004217			53.0688	0.21786	0.19692	1.10621	0.268636	NA	0.268636	1	50.7937	70.3758	42.5618	48.5437
ENSCSAG00000015536	GRB14	growth factor receptor bound protein 14	107.931	0.217804	0.18652	1.16803	0.242796	0.600563	0.242796	0.600563	103.039	136.982	96.5826	95.1195
ENSCSAG00000002031	YY1AP1		129.519	0.21758	0.180549	1.20592	0.22785	0.582894	0.22785	0.582894	153.832	133.211	112.953	118.079
ENSCSAG00000004399	BNIP3	BCL2 interacting protein 3	290.971	0.217575	0.160481	1.35593	0.17512	0.521436	0.17512	0.521436	301.859	335.542	243.094	283.391
ENSCSAG00000017410	TRIP13	thyroid hormone receptor interactor 13	120.853	0.217575	0.181611	1.19871	0.230642	0.58601	0.230642	0.58601	132.064	135.725	108.042	107.583
ENSCSAG00000008151	TRIM26	tripartite motif containing 26	89.96	0.217476	0.190932	1.14049	0.254082	0.60907	0.254082	0.60907	104.49	96.7668	91.6716	66.9116
ENSCSAG00000006586	SUZ12	SUZ12 polycomb repressive complex 2 subunit	556.285	0.217389	0.155583	1.39723	0.162344	0.506043	0.162344	0.506043	519.547	696.218	468.18	541.197
ENSCSAG00000007077	PHF12	PHD finger protein 12	138.063	0.217374	0.180867	1.20201	0.229359	0.584711	0.229359	0.584711	132.064	173.426	119.501	127.263
ENSCSAG00000002269	PXN	paxillin	394.253	0.217356	0.154061	1.41137	0.158136	0.498728	0.158136	0.498728	464.399	397.121	378.964	336.526
ENSCSAG00000004530	WEE1	WEE1 G2 checkpoint kinase	108.972	0.217263	0.185333	1.17272	0.240909	0.597926	0.240909	0.597926	108.844	133.211	97.4011	96.4315
ENSCSAG00000015047	MYO3B		9.57298	0.217079	0.15323	1.42695	0.153594	NA	0.153594	1	10.1587	16.3372	6.54797	5.24797
ENSCSAG00000011689	TAFA4		67.4382	0.217009	0.194884	1.11497	0.264861	NA	0.264861	1	75.4649	76.6594	67.1167	50.5117
ENSCSAG00000007487	E2F6	E2F transcription factor 6	69.5861	0.216631	0.193968	1.11716	0.263927	NA	0.263927	1	72.5624	84.1997	57.2948	64.2877
ENSCSAG00000006576	VDR	vitamin D receptor	14.7539	0.216549	0.173249	1.25374	0.209938	NA	0.209938	1	18.8662	18.8507	11.459	9.83995
ENSCSAG00000017836	WBP4	WW domain binding protein 4	52.6966	0.216547	0.196684	1.10223	0.270362	NA	0.270362	1	60.9524	59.0654	47.4728	43.2958
ENSCSAG00000011116	CACTIN		97.2149	0.216542	0.188386	1.15079	0.249819	0.60724	0.249819	0.60724	117.551	99.2802	93.3086	78.7196
ENSCSAG00000009417	TAP1		130.677	0.216539	0.187261	1.15787	0.246919	0.604766	0.246919	0.604766	175.601	115.617	131.778	99.7115
ENSCSAG00000006083	PRPF40B		92.6175	0.216463	0.191937	1.12949	0.258689	0.614263	0.258689	0.614263	126.259	81.6862	88.3977	74.1276
ENSCSAG00000003366			5.39273	0.216452	0.125567	1.77025	0.0766858	NA	0.0766858	1	7.25624	10.0537	1.63699	2.62399
ENSCSAG00000017959	UBL3	ubiquitin like 3	295.144	0.216446	0.173949	1.24408	0.21347	0.56842	0.21347	0.56842	277.188	373.243	215.265	314.878
ENSCSAG00000009645	SLC5A6	sodium-dependent multivitamin transporter	64.6619	0.216314	0.195243	1.10891	0.267467	NA	0.267467	1	66.7574	79.1728	62.2058	50.5117
ENSCSAG00000017374	STARD7	StAR related lipid transfer domain containing 7	1040.81	0.216312	0.134129	1.61291	0.106763	0.411027	0.106763	0.411027	1165.35	1095.85	989.563	912.491
ENSCSAG00000004859	UNK	unk zinc finger	167.716	0.216307	0.174465	1.24024	0.214886	0.569625	0.214886	0.569625	166.893	202.331	154.696	146.943
ENSCSAG00000018006	CENPJ	centromere protein J	45.0653	0.216307	0.197165	1.09762	0.272371	NA	0.272371	1	50.7937	52.7819	36.0139	40.6718
ENSCSAG00000001018	YTHDF2	YTH N6-methyladenosine RNA binding protein 2	200.1	0.216215	0.17084	1.26576	0.205601	0.562167	0.205601	0.562167	197.37	242.545	170.247	190.239
ENSCSAG00000003499	CD79A		69.6014	0.216124	0.193847	1.11619	0.264339	NA	0.264339	1	81.2698	75.4027	64.6612	57.0717
ENSCSAG00000003702	PCF11	PCF11 cleavage and polyadenylation factor subunit	216.772	0.21606	0.16523	1.30817	0.190815	0.54314	0.190815	0.54314	236.553	238.775	198.895	192.863
ENSCSAG00000014202	RIMS4	regulating synaptic membrane exocytosis 4	135.595	0.215937	0.187349	1.15412	0.24845	0.606749	0.24845	0.606749	181.406	120.644	139.963	100.367
ENSCSAG00000000752	CAMTA1	calmodulin binding transcription activator 1	78.1061	0.215936	0.193079	1.11928	0.263019	0.618517	0.263019	0.618517	78.3674	96.7668	76.9387	60.3517
ENSCSAG00000003915	GDPD5	glycerophosphodiester phosphodiesterase domain containing 5	94.0404	0.215908	0.194817	1.1081	0.267819	0.622296	0.267819	0.622296	69.6599	142.008	88.3977	76.0956
ENSCSAG00000001697	PTGFRN	prostaglandin F2 receptor inhibitor	371.108	0.21586	0.151569	1.42458	0.154277	0.493068	0.154277	0.493068	404.898	404.661	349.498	325.374
ENSCSAG00000004172	PTPRB	protein tyrosine phosphatase receptor type B	10.5396	0.215821	0.157069	1.38743	0.16531	NA	0.16531	1	17.415	11.3104	8.18497	5.24797
ENSCSAG00000009299		ribosomal protein S24	286.26	0.215695	0.174456	1.23723	0.216001	0.569625	0.216001	0.569625	386.032	245.059	282.381	231.567
[truncated: 10,760 more rows]

## Sheet: TE_up
gene_ID	external_gene_name	wikigene_description	log2FC_TE_final	pvalue_final	pvalue.adjust	log2FC_TE_v1	pvalue_v1	WT_log2TE	mock_log2TE	log2FC_TE_v2	pvalue_v2	noCHX_Ribo_12hpi_WT_1	noCHX_Ribo_12hpi_WT_2	noCHX_Ribo_12hpi_mock_1	noCHX_Ribo_12hpi_mock_2	noCHX_RNA_12hpi_WT_1	noCHX_RNA_12hpi_WT_2	noCHX_RNA_12hpi_mock_1	noCHX_RNA_12hpi_mock_2
ENSCSAG00000008194	PRR36		8.24975	2.62434e-17	6.4291e-14	8.24975	2.62434e-17	10.2074	1.96963	8.24216	3.41915e-30	34.6	51.5647	19.6148	26.8076	0	0	6.36002	5.78026
ENSCSAG00000010886	TMEM72		7.94171	0.000500431	0.0467922	7.95255	0.000437699	6.76448	-1.1375	7.94171	0.000500431	1.01765	7.36639	3.09708	1.51741	0	0	8.74503	1.92675
ENSCSAG00000007127			7.40239	3.07783e-07	0.000121614	7.40239	3.07783e-07	8.0124	0.637432	7.38388	3.185e-08	12.2118	7.36639	7.74269	5.56384	0	0	5.56502	2.56901
ENSCSAG00000000246			6.82574	3.00329e-05	0.00656915	6.82574	3.00329e-05	7.67136	0.87447	6.80743	2.70216e-06	8.14117	7.36639	6.19415	5.05804	0	0	2.38501	3.85351
ENSCSAG00000011877			6.21892	4.45988e-06	0.00133242	6.21892	4.45988e-06	10.2563	4.03562	6.22104	1.449e-24	56.9882	33.1488	43.8752	38.4411	0	0	3.97501	1.2845
ENSCSAG00000005985	UBE2L6	ubiquitin conjugating enzyme E2 L6	6.04861	4.19444e-06	0.00128444	6.04861	4.19444e-06	7.85193	1.80735	6.03089	4.265e-08	10.1765	7.36639	16.5177	10.6219	0	0	7.15502	0.642252
ENSCSAG00000009041	IGFBP5	insulin like growth factor binding protein 5	6.03804	5.20459e-05	0.010451	6.03804	5.20459e-05	8.22389	2.20163	6.02267	2.89502e-08	11.1941	11.0496	13.9368	9.10447	0	0	1.59	2.56901
ENSCSAG00000008657			5.96618	7.35529e-06	0.00200211	5.96618	7.35529e-06	7.67136	1.70044	5.95542	2.61359e-07	8.14117	7.36639	17.0339	9.10447	0	0	3.97501	4.49576
ENSCSAG00000013178			1.81907	0.000443141	0.0441303	1.81515	7.74598e-05	-0.80023	-2.61298	1.81907	0.000443141	52.9176	62.6143	26.8413	24.2786	129.524	71.9005	163.77	148.36
ENSCSAG00000018647		D-dopachrome decarboxylase	1.5476	0.000571019	0.0499601	1.5476	0.000571019	1.84472	0.297386	1.54963	0.000216695	77.3411	99.4463	44.3914	58.1675	24.7405	23.5311	53.2652	29.5436
ENSCSAG00000008166			1.49681	7.36638e-05	0.0128901	1.49529	7.32947e-05	1.54374	0.0482556	1.49681	7.36638e-05	110.923	95.7631	88.7828	63.2255	32.0171	39.2184	81.0902	65.5097
ENSCSAG00000011289		translocase of outer mitochondrial membrane 6	1.47724	8.78798e-05	0.0141637	1.47501	5.01349e-05	1.12131	-0.354532	1.47724	8.78798e-05	96.6764	151.011	69.6842	70.3068	64.0342	49.6767	93.8103	84.7772
ENSCSAG00000006862	POLR2F	RNA polymerase II, I and III subunit F	1.4636	0.000152729	0.0203345	1.46056	5.54077e-05	0.630614	-0.830075	1.4636	0.000152729	105.835	198.893	68.1357	66.7661	114.97	82.3587	136.74	103.402
ENSCSAG00000003745			1.46328	5.23778e-06	0.00152756	1.46182	3.39364e-06	1.46271	2.96438e-07	1.46328	5.23778e-06	167.912	272.557	152.789	122.405	93.1406	66.6713	156.615	118.174
ENSCSAG00000000156			1.34982	0.000327243	0.0354726	1.34645	8.57213e-05	1.02867	-0.319372	1.34982	0.000327243	160.788	397.785	119.754	106.219	146.988	126.806	152.64	129.093
ENSCSAG00000010296	CDKN1A	cyclin dependent kinase inhibitor 1A	1.34501	2.85592e-07	0.000120628	1.34501	2.85592e-07	2.23206	0.886044	1.34664	7.26381e-08	476.258	721.906	297.835	285.779	154.264	100.661	164.565	150.929
ENSCSAG00000013008		SEM1 26S proteasome complex subunit	1.3217	9.37555e-07	0.000337768	1.3217	9.37555e-07	2.53456	1.21172	1.32356	6.1976e-07	491.523	858.185	364.939	352.545	117.881	115.041	179.671	130.377
ENSCSAG00000004489		BRCA2 and CDKN1A interacting protein	1.26804	0.000117468	0.0171293	1.26585	5.78281e-05	0.9386	-0.327927	1.26804	0.000117468	142.47	202.576	100.655	90.5389	85.864	94.1242	124.815	116.248
ENSCSAG00000017554	C7orf50	chromosome unknown C7orf50 homolog	1.26183	0.000569742	0.0499601	1.26027	0.000369012	1.24672	-0.0140748	1.26183	0.000569742	103.8	195.209	98.0741	105.713	61.1235	65.3641	124.02	82.2082
ENSCSAG00000009568	TAPBP	TAP binding protein	1.24701	0.000134134	0.0186706	1.24701	0.000134134	2.76618	1.51768	1.24836	1.51727e-05	184.194	265.19	217.311	180.572	30.5618	35.2966	73.9352	64.8674
ENSCSAG00000017792		PDGFA associated protein 1	1.22289	1.78299e-05	0.00412073	1.22289	1.78299e-05	2.33925	1.11502	1.22438	1.01879e-05	282.906	471.449	266.349	256.443	81.498	67.9786	127.995	113.036
ENSCSAG00000001319	PRKAA2	protein kinase AMP-activated catalytic subunit alpha 2	1.21785	0.000221531	0.0267858	1.21785	0.000221531	1.31703	0.0989668	1.21958	0.000164883	143.488	151.011	91.8799	88.5157	55.3022	62.7495	77.1152	92.4842
ENSCSAG00000000147		cofilin-1	1.12684	0.000104358	0.0157813	1.12549	1.59461e-05	0.384144	-0.741776	1.12684	0.000104358	323.612	600.361	234.862	243.798	375.473	333.357	448.381	352.596
ENSCSAG00000009369		cysteine rich protein 1	1.09442	0.000126372	0.0177952	1.09442	0.000126372	3.26362	2.16692	1.09655	8.57207e-05	491.523	987.097	623.545	574.593	87.3193	66.6713	149.46	117.532
ENSCSAG00000014959	STARD4	StAR related lipid transfer domain containing 4	1.09181	0.000126393	0.0177952	1.09181	0.000126393	2.07446	0.981853	1.09237	5.55498e-05	205.565	290.973	243.637	229.635	68.4001	49.6767	127.2	113.036
ENSCSAG00000013482	TSPAN13		1.06632	0.000366201	0.0386689	1.06632	0.000366201	3.02857	1.95983	1.06888	7.54522e-05	304.276	511.964	333.968	339.395	45.115	54.9058	81.8852	90.5575
ENSCSAG00000011425	MPDU1	mannose-P-dolichol utilization defect 1	1.0549	7.17168e-05	0.0127313	1.0549	7.17168e-05	2.25432	1.19884	1.05603	9.47373e-06	350.07	441.984	275.64	290.837	68.4001	98.0461	135.15	112.394
ENSCSAG00000006832	ACP1		1.04804	0.00016344	0.0210734	1.04635	0.000154216	1.54749	0.500339	1.04804	0.00016344	243.217	364.636	199.761	189.171	113.515	94.1242	136.74	138.084
ENSCSAG00000005084	NDUFA13		1.02215	8.38836e-06	0.00218615	1.02157	4.25663e-06	1.52411	0.502305	1.02215	8.38836e-06	887.388	1410.66	931.704	908.424	464.248	334.664	745.712	552.979
ENSCSAG00000019745	EID1	EP300 interacting inhibitor of differentiation 1	1.00851	4.05996e-05	0.00857422	1.00851	4.05996e-05	2.11677	1.10736	1.00975	3.58636e-05	440.641	677.708	535.278	469.386	152.809	104.582	245.656	219.65

## Sheet: TE_down
gene_ID	external_gene_name	wikigene_description	log2FC_TE_final	pvalue_final	pvalue.adjust	log2FC_TE_v1	pvalue_v1	WT_log2TE	mock_log2TE	log2FC_TE_v2	pvalue_v2	noCHX_Ribo_12hpi_WT_1	noCHX_Ribo_12hpi_WT_2	noCHX_Ribo_12hpi_mock_1	noCHX_Ribo_12hpi_mock_2	noCHX_RNA_12hpi_WT_1	noCHX_RNA_12hpi_WT_2	noCHX_RNA_12hpi_mock_1	noCHX_RNA_12hpi_mock_2
ENSCSAG00000014681	ARRDC3	arrestin domain containing 3	-3.81728	1.28037e-05	0.00326725	-3.80835	1.77585e-13	-4.06609	-0.272079	-3.81728	1.28037e-05	12.2118	3.6832	28.906	24.2786	130.979	137.265	27.0301	36.6083
ENSCSAG00000011934	KLF10	Kruppel like factor 10	-3.29367	3.37126e-26	4.12945e-22	-3.29768	7.78173e-38	-1.63986	1.65303	-3.29367	3.37126e-26	189.282	128.912	210.601	223.06	487.533	503.303	64.3952	73.8589
ENSCSAG00000009591	DUSP1	dual specificity phosphatase 1	-2.65814	2.76982e-24	1.69638e-20	-2.66483	1.47087e-25	-2.03902	0.622196	-2.65814	2.76982e-24	553.6	604.044	73.2975	84.4693	2548.27	2210.61	51.6752	50.0956
ENSCSAG00000008869	HES1	hes family bHLH transcription factor 1	-2.64691	6.30468e-22	2.5742e-18	-2.65029	1.86756e-31	-1.9437	0.703951	-2.64691	6.30468e-22	236.094	279.923	170.855	189.171	995.44	989.612	108.915	111.752
ENSCSAG00000011516	GADD45B	growth arrest and DNA damage inducible beta	-2.4815	4.6548e-18	1.42542e-14	-2.48564	3.90484e-27	-0.468633	2.01324	-2.4815	4.6548e-18	756.111	1502.74	426.364	449.66	1731.83	1393.56	107.325	110.467
ENSCSAG00000000927	ID3	inhibitor of DNA binding 3, HLH protein	-2.23186	2.69953e-11	2.36189e-08	-2.23186	2.69953e-11	-0.416813	1.81003	-2.22797	2.52611e-11	110.923	92.0799	131.11	138.59	148.443	122.884	41.3401	35.9661
ENSCSAG00000000149	JUN	Jun proto-oncogene, AP-1 transcription factor subunit	-1.95957	2.2845e-11	2.15253e-08	-1.96572	4.13082e-14	-0.355943	1.6047	-1.95957	2.2845e-11	541.388	1034.98	188.922	178.549	1097.31	920.326	67.5752	53.3069
ENSCSAG00000000006	ND1	NADH dehydrogenase subunit 1	-1.89692	0.000231824	0.027569	-1.89692	0.000231824	-0.0489089	1.83954	-1.88857	5.90884e-05	75.3058	40.5152	54.715	80.9286	34.9277	84.9733	13.515	23.7633
ENSCSAG00000012217	FLNB	filamin B	-1.64299	4.58276e-12	5.61342e-09	-1.64396	2.33245e-16	-1.78453	-0.141472	-1.64299	4.58276e-12	373.476	346.22	245.185	249.867	1285.05	1192.24	263.146	282.591
ENSCSAG00000010062	MARK3	microtubule affinity regulating kinase 3	-1.64135	8.77678e-05	0.0141637	-1.64231	2.84225e-07	-1.92184	-0.282238	-1.64135	8.77678e-05	84.4646	44.1984	96.0093	102.678	206.656	278.451	113.685	128.45
ENSCSAG00000009162	FN1	fibronectin 1	-1.63234	7.31964e-09	4.26944e-06	-1.63296	3.73938e-12	-1.49792	0.134018	-1.63234	7.31964e-09	243.217	184.16	282.35	213.955	542.835	662.792	250.426	202.309
ENSCSAG00000012060	TIPARP	TCDD inducible poly(ADP-ribose) polymerase	-1.62108	3.82542e-09	2.34288e-06	-1.62436	2.96919e-10	-0.783146	0.838637	-1.62108	3.82542e-09	245.253	209.942	161.048	177.031	356.554	426.174	81.8852	106.614
ENSCSAG00000001494	PTBP2	polypyrimidine tract binding protein 2	-1.61924	0.000119572	0.017231	-1.62092	6.45158e-06	-1.4986	0.119464	-1.61924	0.000119572	61.0588	47.8816	75.3622	76.3764	117.881	189.556	62.8052	75.7857
ENSCSAG00000004758	PLEKHA7		-1.61487	0.000565603	0.0499601	-1.61883	0.000104185	-1.18982	0.423808	-1.61487	0.000565603	40.7058	55.2479	51.6179	57.6617	141.166	78.4369	42.1351	40.4618
ENSCSAG00000011386	FXR2	FMR1 autosomal homolog 2	-1.60873	1.34675e-05	0.00326725	-1.60927	8.83977e-08	-1.54553	0.0611117	-1.60873	1.34675e-05	62.0764	73.6639	110.979	106.219	205.2	192.17	113.685	94.411
ENSCSAG00000014076	ELF3	E74 like ETS transcription factor 3	-1.5808	5.98579e-11	4.58249e-08	-1.58146	6.11379e-13	-0.936051	0.64449	-1.5808	5.98579e-11	268.659	272.557	279.769	289.32	561.754	474.543	193.186	171.481
ENSCSAG00000007060	ID2		-1.57268	3.56095e-06	0.00111841	-1.57561	8.06473e-07	-0.15341	1.41799	-1.57268	3.56095e-06	124.153	81.0303	146.595	178.549	116.426	112.426	63.6002	57.8026
ENSCSAG00000010905	BHLHE40	basic helix-loop-helix family member e40	-1.54591	8.0629e-16	1.41089e-12	-1.54764	5.27651e-16	0.100672	1.64699	-1.54591	8.0629e-16	1110.25	1248.6	554.893	537.67	1012.9	1187.01	168.54	180.473
ENSCSAG00000007165	FGD3	FYVE, RhoGEF and PH domain containing 3	-1.51	0.000370392	0.0387772	-1.51245	0.000116302	-0.599759	0.908078	-1.51	0.000370392	48.847	47.8816	73.2975	79.4112	78.5874	67.9786	43.7251	37.2506
ENSCSAG00000017469	COL4A2		-1.48769	3.2746e-16	6.68509e-13	-1.48769	3.2746e-16	0.0488701	1.53623	-1.48737	1.09245e-17	2322.27	2692.42	2961.32	2772.82	2680.7	2166.16	1155.14	822.082
ENSCSAG00000009140	WDR91	WD repeat domain 91	-1.46189	0.00017662	0.0223032	-1.46506	0.000133732	-0.16711	1.29278	-1.46189	0.00017662	62.0764	51.5647	102.203	94.0796	62.5789	65.3641	37.3651	43.0309
ENSCSAG00000012077	CCNL1	cyclin L1	-1.4551	8.33748e-05	0.0141637	-1.46234	2.56267e-05	-0.724058	0.733355	-1.4551	8.33748e-05	137.382	110.496	57.8121	75.3648	174.639	232.696	41.3401	38.5351
ENSCSAG00000008773	DBN1	drebrin 1	-1.38509	5.26148e-12	5.8589e-09	-1.38509	5.26148e-12	0.55149	1.93621	-1.38498	5.54286e-14	770.358	784.521	1254.83	1155.76	592.316	469.314	362.521	266.534
ENSCSAG00000007501	ITGB2		-1.36834	6.86433e-05	0.0125494	-1.36834	6.86433e-05	0.14901	1.51383	-1.36537	2.1358e-05	106.853	106.813	148.143	129.486	116.426	77.1296	45.3151	52.0224
ENSCSAG00000017037	REPS1	RALBP1 associated Eps domain containing 1	-1.35767	0.000557559	0.0499601	-1.36094	0.000107269	-0.653824	0.703189	-1.35767	0.000557559	90.5705	58.9311	85.6858	110.771	103.328	133.343	52.4702	68.7209
ENSCSAG00000012765	ID1	DNA-binding protein inhibitor ID-1	-1.32617	2.15089e-09	1.46368e-06	-1.32617	2.15089e-09	0.0176628	1.34275	-1.32492	2.66639e-10	439.623	464.083	489.338	523.001	522.461	371.268	221.011	177.904
ENSCSAG00000008854	PLEC		-1.30843	1.9706e-12	2.68198e-09	-1.30875	1.82161e-14	-1.44715	-0.138588	-1.30843	1.9706e-12	1065.48	1123.37	1026.68	907.412	3178.42	2788.43	1176.6	952.459
ENSCSAG00000001158	EDN2		-1.27698	5.86252e-05	0.0112203	-1.27698	5.86252e-05	0.931731	2.20489	-1.27259	2.01538e-06	237.112	217.309	182.727	172.479	128.068	109.812	39.7501	37.2506
ENSCSAG00000007490	NEDD9	neural precursor cell expressed, developmentally down-regulated 9	-1.27502	0.000247617	0.0286138	-1.27502	0.000247617	-0.383915	0.886343	-1.26769	0.000224779	147.559	180.477	61.4253	60.6965	195.013	232.696	26.2351	39.8196
ENSCSAG00000009985	FLNC	filamin C	-1.25716	1.49205e-09	1.07507e-06	-1.25829	3.77025e-11	-0.410862	0.846349	-1.25716	1.49205e-09	651.294	559.846	547.15	503.275	854.274	755.609	291.766	291.582
ENSCSAG00000019097	H2BC3		-1.23821	2.44991e-07	0.000111144	-1.23979	1.39515e-09	-0.154068	1.08426	-1.23821	2.44991e-07	633.994	412.518	584.315	597.355	580.674	584.355	283.021	274.241
ENSCSAG00000017470	COL4A1	collagen type IV alpha 1 chain	-1.21632	1.64398e-12	2.51714e-09	-1.21632	1.64398e-12	0.5204	1.73652	-1.21632	8.08058e-14	5188.98	5834.18	5873.6	5869.35	4294.66	3389.78	2016.92	1507.36
ENSCSAG00000006772	FLNA	filamin A	-1.20282	3.00037e-11	2.45011e-08	-1.20286	2.73917e-14	-0.793475	0.409436	-1.20282	3.00037e-11	3260.54	2736.61	2565.41	3003.97	5592.8	4802.95	2130.61	2062.27
ENSCSAG00000019089		histone H3.1	-1.19732	2.5476e-08	1.30023e-05	-1.19857	3.18082e-09	-0.109388	1.08821	-1.19732	2.5476e-08	569.882	471.449	468.175	492.653	583.584	538.6	208.291	244.056
ENSCSAG00000013953	PLCG1		-1.19164	2.87583e-05	0.00640473	-1.1932	1.48096e-06	-0.645335	0.54623	-1.19164	2.87583e-05	193.353	158.377	248.798	191.7	267.779	281.065	155.025	147.076
ENSCSAG00000012942	POLRMT		-1.17618	0.000319524	0.0349451	-1.17835	3.66927e-05	-1.06609	0.110424	-1.17618	0.000319524	191.317	128.912	162.596	122.405	392.937	277.144	150.255	114.321
ENSCSAG00000011901	TCF12	transcription factor 12	-1.17197	0.000180098	0.0225105	-1.17469	0.000100495	-0.0590945	1.1128	-1.17197	0.000180098	173	114.179	170.339	188.665	125.158	173.868	73.9352	92.4842
ENSCSAG00000007963	MYH9	myosin heavy chain 9	-1.16946	1.05546e-11	1.07736e-08	-1.16992	9.84222e-14	0.461691	1.63122	-1.16946	1.05546e-11	5845.36	6935.46	5275.87	4739.38	4945.18	4334.94	1721.98	1511.22
ENSCSAG00000005364	GDF15	growth differentiation factor 15	-1.14225	2.68838e-07	0.000117607	-1.14225	2.68838e-07	-0.0204639	1.12003	-1.1396	1.24194e-07	656.382	674.025	247.766	228.118	743.67	605.271	118.455	101.476
ENSCSAG00000001782	TXNIP	thioredoxin interacting protein	-1.12795	1.32007e-08	7.34981e-06	-1.12795	7.42036e-09	0.286554	1.41409	-1.12795	1.32007e-08	332.77	372.003	1043.2	992.893	257.592	320.284	400.681	362.872
ENSCSAG00000015487	RAE1	ribonucleic acid export 1	-1.12543	0.000214304	0.0262501	-1.12783	8.9932e-05	0.495656	1.62045	-1.12543	0.000214304	235.076	132.595	276.672	258.466	136.8	124.192	85.8603	87.9885
ENSCSAG00000002155	FASN	fatty acid synthase	-1.09549	6.15947e-06	0.00171471	-1.09604	2.71572e-07	-0.310897	0.784379	-1.09549	6.15947e-06	1126.53	710.857	832.081	663.109	1287.96	992.226	488.926	378.928
ENSCSAG00000018838	JUNB	JunB proto-oncogene, AP-1 transcription factor subunit	-1.09406	1.25685e-07	5.92121e-05	-1.09571	2.77654e-08	-0.315713	0.778786	-1.09406	1.25685e-07	734.741	847.135	343.259	356.592	1063.84	904.639	203.521	204.236
ENSCSAG00000015604	COL5A1	collagen type V alpha 1 chain	-1.09132	2.81911e-09	1.81744e-06	-1.09127	4.35145e-10	0.476873	1.56802	-1.09132	2.81911e-09	2588.89	3329.61	2633.55	2531.04	2239.74	2013.21	989.778	752.077
ENSCSAG00000000221	H2BC18	histone H2B type 2-F	-1.0681	6.0963e-06	0.00171471	-1.06929	3.14059e-07	-0.260816	0.807355	-1.0681	6.0963e-06	510.858	357.27	486.241	501.252	494.81	545.136	259.966	303.785
ENSCSAG00000011617	PTK7	protein tyrosine kinase 7 (inactive)	-1.02304	3.04026e-08	1.48961e-05	-1.02352	2.58396e-08	0.294363	1.31727	-1.02304	3.04026e-08	810.046	810.303	906.927	947.371	726.206	594.813	389.551	353.881
ENSCSAG00000001202	KIF2C	kinesin family member 2C	-1.01345	0.000490269	0.0465392	-1.01574	0.000253595	0.100137	1.1136	-1.01345	0.000490269	199.459	143.645	189.438	194.229	158.63	160.796	88.2453	89.273
ENSCSAG00000002283	SLC38A10	solute carrier family 38 member 10	-1.00929	0.000110875	0.0165623	-1.00995	5.38242e-05	-0.169019	0.839934	-1.00929	0.000110875	221.847	309.388	298.352	272.628	353.643	243.154	164.565	154.14
ENSCSAG00000012430	COL5A2	collagen type V alpha 2 chain	-1.00609	1.73715e-08	9.25144e-06	-1.00609	1.73715e-08	-0.707925	0.298269	-1.00603	7.27635e-09	2061.75	1841.6	2255.7	2037.88	3610.65	2766.21	2001.02	1491.31
ENSCSAG00000019098	H2AC4	histone H2A type 1-B	-1.00556	3.44095e-06	0.00111841	-1.00556	3.44095e-06	0.162173	1.16672	-1.00426	2.38398e-06	484.4	559.846	466.11	432.462	537.014	396.106	213.061	186.895

## Sheet: TE_full
gene_ID	external_gene_name	wikigene_description	log2FC_TE_final	pvalue_final	pvalue.adjust	log2FC_TE_v1	pvalue_v1	WT_log2TE	mock_log2TE	log2FC_TE_v2	pvalue_v2	noCHX_Ribo_12hpi_WT_1	noCHX_Ribo_12hpi_WT_2	noCHX_Ribo_12hpi_mock_1	noCHX_Ribo_12hpi_mock_2	noCHX_RNA_12hpi_WT_1	noCHX_RNA_12hpi_WT_2	noCHX_RNA_12hpi_mock_1	noCHX_RNA_12hpi_mock_2
ENSCSAG00000008194	PRR36		8.24975	2.62434e-17	6.4291e-14	8.24975	2.62434e-17	10.2074	1.96963	8.24216	3.41915e-30	34.6	51.5647	19.6148	26.8076	0	0	6.36002	5.78026
ENSCSAG00000011706	AMH	anti-Mullerian hormone	8.01906	0.0196644	0.390853	8.01906	0.0196644	6.57182	-2.32191	8.31078	0.016258	0	7.36639	0.516179	0	0	0	2.38501	3.21126
ENSCSAG00000010886	TMEM72		7.94171	0.000500431	0.0467922	7.95255	0.000437699	6.76448	-1.1375	7.94171	0.000500431	1.01765	7.36639	3.09708	1.51741	0	0	8.74503	1.92675
ENSCSAG00000014413			7.56703	0.0119609	0.314398	7.56703	0.0119609	6.0864	-1.32192	7.57127	0.01196	1.01765	3.6832	0.516179	1.01161	0	0	1.59	2.56901
ENSCSAG00000004999	RDH16	retinol dehydrogenase 16	7.53859	0.0282799	0.451491	7.53859	0.0282799	6.0864	-2.32191	7.57779	0.0278551	1.01765	3.6832	1.03236	0	0	0	1.59	2.56901
ENSCSAG00000007127			7.40239	3.07783e-07	0.000121614	7.40239	3.07783e-07	8.0124	0.637432	7.38388	3.185e-08	12.2118	7.36639	7.74269	5.56384	0	0	5.56502	2.56901
ENSCSAG00000014772	MEF2C		6.98582	0.00323481	0.154688	6.98582	0.00323481	6.57183	-0.321924	6.94804	0.00253415	3.05294	3.6832	1.03236	3.03482	0	0	2.38501	2.56901
ENSCSAG00000000246			6.82574	3.00329e-05	0.00656915	6.82574	3.00329e-05	7.67136	0.87447	6.80743	2.70216e-06	8.14117	7.36639	6.19415	5.05804	0	0	2.38501	3.85351
ENSCSAG00000007252	ALDOC	aldolase, fructose-bisphosphate C	6.46738	0.0126044	0.322995	6.46738	0.0126044	6.0864	-0.321923	6.44281	0.0123372	1.01765	3.6832	2.5809	1.01161	0	0	0.795002	3.85351
ENSCSAG00000011877			6.21892	4.45988e-06	0.00133242	6.21892	4.45988e-06	10.2563	4.03562	6.22104	1.449e-24	56.9882	33.1488	43.8752	38.4411	0	0	3.97501	1.2845
ENSCSAG00000010016	CLPSL1		6.17571	0.00151844	0.0973787	6.17571	0.00151844	6.57183	0.415039	6.14503	0.00106386	3.05294	3.6832	3.61325	4.04643	0	0	3.18001	2.56901
ENSCSAG00000011804	ARHGEF37	Rho guanine nucleotide exchange factor 37	6.15895	0.0167589	0.366538	6.15895	0.0167589	6.0864	3.01285e-06	6.11236	0.0146146	1.01765	3.6832	1.54854	1.51741	0	0	2.38501	1.92675
ENSCSAG00000005985	UBE2L6	ubiquitin conjugating enzyme E2 L6	6.04861	4.19444e-06	0.00128444	6.04861	4.19444e-06	7.85193	1.80735	6.03089	4.265e-08	10.1765	7.36639	16.5177	10.6219	0	0	7.15502	0.642252
ENSCSAG00000009041	IGFBP5	insulin like growth factor binding protein 5	6.03804	5.20459e-05	0.010451	6.03804	5.20459e-05	8.22389	2.20163	6.02267	2.89502e-08	11.1941	11.0496	13.9368	9.10447	0	0	1.59	2.56901
ENSCSAG00000008657			5.96618	7.35529e-06	0.00200211	5.96618	7.35529e-06	7.67136	1.70044	5.95542	2.61359e-07	8.14117	7.36639	17.0339	9.10447	0	0	3.97501	4.49576
ENSCSAG00000009798	SPDEF	SAM pointed domain containing ETS transcription factor	5.7858	0.0484079	0.576238	5.7858	0.0484079	5.76447	3.01287e-06	6.10993	0.0371719	0	3.6832	2.5809	0.505804	0	0	2.38501	1.92675
ENSCSAG00000009430		major histocompatibility complex, class II, DM beta	5.62731	0.00313754	0.151904	5.62731	0.00313754	6.76447	1.1375	5.60952	0.00146436	1.01765	7.36639	6.71033	3.54063	0	0	1.59	3.21126
ENSCSAG00000005170			5.53207	0.0171593	0.370406	5.53207	0.0171593	6.0864	0.584963	5.48692	0.0135296	1.01765	3.6832	3.09708	2.52902	0	0	3.18001	1.2845
ENSCSAG00000012545	ACTRT3		5.3486	0.0395727	0.531498	5.3486	0.0395727	5.34945	3.2324e-06	5.7145	0.0325431	3.05294	0	4.12943	2.02322	0	0	1.59	3.85351
ENSCSAG00000008529	TMEM252	transmembrane protein 252	5.13952	0.00443584	0.186077	5.13952	0.00443584	6.57183	1.41504	5.315	0.00197407	0	7.36639	7.22651	9.10447	0	0	3.18001	2.56901
ENSCSAG00000014781	ADCYAP1R1	ADCYAP receptor type I	5.02265	0.017884	0.374806	5.02265	0.017884	5.76448	0.736966	5.29557	0.0127765	0	3.6832	3.61325	5.56384	0	0	4.77001	0.642252
ENSCSAG00000000755	TNFRSF9		5.00476	0.0196905	0.390853	5.00476	0.0196905	6.34943	1.32193	5.22905	0.00935006	6.10588	0	4.64561	4.55224	0	0	2.38501	1.92675
ENSCSAG00000011758	LRRC17	leucine rich repeat containing 17	4.53797	0.0140466	0.332156	4.53797	0.0140466	6.34944	1.80735	4.49334	0.00514362	2.03529	3.6832	9.29123	4.55224	0	0	2.38501	1.92675
ENSCSAG00000002404	SCN3B	sodium voltage-gated channel beta subunit 3	4.49088	0.0879637	0.70733	4.49088	0.0879637	4.76449	0.263036	4.99919	0.0693741	2.03529	0	3.09708	3.03482	0	0	2.38501	3.21126
ENSCSAG00000009025			4.28294	0.0739635	0.672486	4.28294	0.0739635	2.80734	-1.32192	4.30657	0.0678565	3.05294	3.6832	0.516179	1.01161	1.45532	0	0.795002	4.49576
ENSCSAG00000000733	CHD5	chromodomain helicase DNA binding protein 5	4.24363	0.118368	0.759902	4.24363	0.118368	2.80733	-1.32192	4.51928	0.0958674	0	7.36639	1.03236	1.01161	1.45532	0	2.38501	2.56901
ENSCSAG00000016938			4.19989	0.00362169	0.163698	4.20246	0.00345141	3.70042	-0.485424	4.19989	0.00362169	9.15882	3.6832	6.19415	3.54063	0	1.30728	6.36002	7.70702
ENSCSAG00000006222	GBX2	gastrulation brain homeobox 2	4.06433	0.0513243	0.590857	4.04968	0.0503709	2.99998	-0.999994	4.06433	0.0513243	1.01765	7.36639	1.54854	1.51741	0	1.30728	5.56502	1.92675
ENSCSAG00000011979	NCALD	neurocalcin delta	3.56103	0.116131	0.755854	3.56103	0.116131	4.76449	1.16992	4.05839	0.0808195	2.03529	0	2.5809	6.06965	0	0	0.795002	3.21126
ENSCSAG00000018883	SOX2	SRY-box transcription factor 2	3.55512	0.0154668	0.350872	3.55512	0.0154668	3.99998	0.459433	3.55488	0.00783058	5.08823	11.0496	3.09708	7.58706	1.45532	0	2.38501	5.78026
ENSCSAG00000016554	RPGRIP1		3.55063	0.154456	0.799631	3.55063	0.154456	2.80733	-0.584958	3.5623	0.12307	3.05294	3.6832	0.516179	1.01161	1.45532	0	2.38501	0.642252
ENSCSAG00000014484	WFDC3		3.41059	0.00620928	0.227037	3.41059	0.00620928	3.90687	0.502502	3.39915	0.00378913	8.14117	7.36639	10.3236	6.57545	0	1.30728	7.95002	4.49576
ENSCSAG00000008252			3.3938	0.268279	0.902042	3.3938	0.268279	2.32191	-1.99998	3.49375	0.251154	1.01765	3.6832	1.03236	0	0	1.30728	0.795002	3.21126
ENSCSAG00000001789	LYSMD1	LysM domain containing 1	3.38674	0.00163822	0.101346	3.38674	0.00163822	3.45942	0.0740023	3.38874	0.00128917	7.12352	14.7328	8.25887	12.1393	1.45532	1.30728	11.925	7.06477
ENSCSAG00000003862	ZFP36	ZFP36 ring finger protein	3.34208	0.0256321	0.439706	3.34208	0.0256321	4.58494	1.26303	3.3437	0.00339915	17.3	7.36639	5.67797	5.56384	1.45532	0	3.18001	1.92675
ENSCSAG00000019144	TMEM140	transmembrane protein 140	3.30656	0.143894	0.782666	3.30656	0.143894	2.80734	-0.415033	3.32936	0.123384	3.05294	3.6832	0.516179	2.02322	0	1.30728	2.38501	1.92675
ENSCSAG00000003831			3.29852	0.20117	0.846655	3.29852	0.20117	2.58494	-0.584957	3.3305	0.172755	2.03529	3.6832	1.03236	0.505804	1.45532	0	1.59	1.2845
ENSCSAG00000019000			3.29852	0.20117	0.846655	3.29852	0.20117	2.58494	-0.584957	3.3305	0.172755	2.03529	3.6832	1.03236	1.01161	1.45532	0	0.795002	1.92675
ENSCSAG00000002588	PTH2	parathyroid hormone 2	3.29005	0.00367426	0.164256	3.29005	0.00367426	4.20944	0.926	3.29887	0.000406812	11.1941	25.7824	11.3559	8.09286	1.45532	1.30728	3.18001	7.06477
ENSCSAG00000000584	NRGN		3.26626	0.0244423	0.433862	3.26626	0.0244423	5.70041	2.45943	3.2565	3.22913e-05	23.4059	29.4656	11.8721	9.61028	1.45532	0	0.795002	2.56901
ENSCSAG00000014766	DLX2	distal-less homeobox 2	3.26445	0.114707	0.755854	3.26445	0.114707	3.58494	0.415037	3.25404	0.05836	5.08823	7.36639	3.09708	1.01161	1.45532	0	2.38501	1.2845
ENSCSAG00000010344	GABRB2	gamma-aminobutyric acid type A receptor subunit beta2	3.24971	0.188874	0.837634	3.24971	0.188874	3.7645	0.485428	4.09831	0.138768	1.01765	0	3.09708	3.54063	0	0	3.97501	0.642252
ENSCSAG00000018377	CCDC80		3.19538	0.0955796	0.725295	3.19538	0.0955796	3.45941	0.321929	3.1912	0.0574223	4.07058	7.36639	1.54854	3.03482	0	1.30728	3.18001	1.2845
ENSCSAG00000018111	STARD6	StAR related lipid transfer domain containing 6	3.16528	0.193826	0.84087	3.09355	0.188583	0.999997	-1.99999	3.16528	0.193826	2.03529	3.6832	0.516179	0.505804	0	2.61456	1.59	5.78026
ENSCSAG00000000138	CITED4	Cbp/p300 interacting transactivator with Glu/Asp rich carboxy-terminal domain 4	3.15579	0.152572	0.795453	3.15579	0.152572	3.76451	0.584964	3.98941	0.114944	1.01765	0	5.67797	3.03482	0	0	3.97501	1.92675
ENSCSAG00000014477	RFESD		3.13133	0.131552	0.77113	3.13133	0.131552	3.45941	0.415037	3.12886	0.0729817	7.12352	3.6832	2.06472	1.51741	0	1.30728	2.38501	0.642252
ENSCSAG00000007147	PROCA1		3.11417	0.204435	0.850526	3.11417	0.204435	2.32191	-0.73696	3.13628	0.203201	1.01765	3.6832	1.03236	1.51741	0	1.30728	1.59	2.56901
ENSCSAG00000016440	WNT9A		3.10751	0.189141	0.837712	3.10751	0.189141	1.99999	-0.999994	3.1849	0.16414	1.01765	7.36639	0.516179	1.01161	1.45532	1.30728	0.795002	2.56901
ENSCSAG00000018264			3.10151	0.228353	0.878142	3.10151	0.228353	1.22239	-1.80734	3.41662	0.193348	0	7.36639	1.03236	0.505804	2.91064	0	3.97501	2.56901
ENSCSAG00000009836	CD163L1		3.05667	0.333316	0.930437	3.05667	0.333316	1.99998	-0.999992	3.49847	0.266156	0	3.6832	1.03236	0.505804	1.45532	0	1.59	1.92675
ENSCSAG00000019287	PKDREJ	polycystin family receptor for egg jelly	3.05558	0.187018	0.836801	3.05558	0.187018	1.58496	-1.45942	3.32877	0.166811	6.10588	0	2.06472	1.51741	1.45532	1.30728	5.56502	5.13801
ENSCSAG00000003353	ZNF283		3.0231	0.288083	0.912413	3.0231	0.288083	1.99998	-0.999993	3.39044	0.237107	0	3.6832	1.03236	1.51741	0	1.30728	3.18001	2.56901
ENSCSAG00000018912		ribosomal biogenesis factor-like	2.97083	0.3204	0.925246	2.97083	0.3204	2.32191	-0.584957	3.35274	0.250385	5.08823	0	0.516179	1.01161	1.45532	0	2.38501	1.2845
ENSCSAG00000008833	SLC44A4	solute carrier family 44 member 4	2.96609	0.100419	0.733107	2.96609	0.100419	3.16991	0.222394	2.96645	0.0847207	2.03529	7.36639	1.54854	4.55224	1.45532	0	1.59	4.49576
ENSCSAG00000003005	KRT17		2.92588	0.120421	0.764361	2.92588	0.120421	3.16991	0.263036	2.93502	0.0960654	2.03529	7.36639	4.12943	2.02322	1.45532	0	1.59	2.56901
ENSCSAG00000016151	LYPD6B	LY6/PLAUR domain containing 6B	2.91438	0.266449	0.901098	2.91438	0.266449	1.32192	-1.58495	3.26593	0.22655	5.08823	0	2.06472	1.01161	1.45532	1.30728	4.77001	4.49576
ENSCSAG00000009814	ARMCX2		2.87521	0.0505902	0.588489	2.87521	0.0505902	3.45941	0.584964	2.87291	0.0371875	4.07058	7.36639	4.64561	6.57545	1.45532	0	3.18001	5.13801
ENSCSAG00000006146	PRPH	peripherin	2.81707	0.196761	0.845329	2.81707	0.196761	3.1699	0.415037	2.83301	0.141265	2.03529	7.36639	0.516179	2.52902	1.45532	0	0.795002	1.92675
ENSCSAG00000005460	ELOVL3	ELOVL fatty acid elongase 3	2.7761	0.0842206	0.703368	2.7761	0.0842206	3.99998	1.58496	2.42583	0.0475071	9.15882	7.36639	5.16179	6.57545	0	1.30728	3.97501	0
ENSCSAG00000017023	MYOM2	myomesin 2	2.74752	0.334383	0.931138	2.74752	0.334383	1.99998	-0.736959	3.12971	0.272019	4.07058	0	1.54854	0.505804	1.45532	0	2.38501	2.56901
ENSCSAG00000000397			2.7418	0.0104807	0.291107	2.72914	0.00508784	1.9419	-0.794057	2.7418	0.0104807	94.6411	342.537	35.1002	74.3532	72.7661	40.5257	108.915	79.6392
ENSCSAG00000014961	THAP1	THAP domain containing 1	2.69886	0.00281654	0.140815	2.69886	0.00281654	3.95419	1.25634	2.69274	0.000560009	20.3529	11.0496	21.1634	21.7496	1.45532	1.30728	4.77001	13.4873
ENSCSAG00000006643			2.68063	0.0559609	0.612314	2.67068	0.0392795	1.8393	-0.836993	2.68063	0.0559609	76.3235	585.628	47.4885	69.801	103.328	82.3587	133.56	74.5012
ENSCSAG00000001201	ARMH1	armadillo like helical domain containing 1	2.65981	0.27001	0.902654	2.65981	0.27001	2.58494	1.717e-06	2.66603	0.235026	2.03529	3.6832	2.06472	1.01161	1.45532	0	1.59	1.2845
ENSCSAG00000002072	SYT11	synaptotagmin 11	2.65981	0.27001	0.902654	2.65981	0.27001	2.58494	1.717e-06	2.66603	0.235026	2.03529	3.6832	1.54854	0.505804	0	1.30728	1.59	1.2845
ENSCSAG00000007023	ZNF786		2.65972	0.0153107	0.349238	2.65972	0.0153107	2.03562	-0.621486	2.68579	0.0147806	4.07058	36.832	5.16179	8.09286	7.27661	2.61456	11.925	8.34927
ENSCSAG00000012692		diphosphoinositol polyphosphate phosphohydrolase 3-beta	2.63588	0.407867	0.949397	2.63588	0.407867	1.99998	-0.584957	3.06518	0.321798	0	3.6832	1.03236	1.01161	0	1.30728	0.795002	1.92675
ENSCSAG00000001173	ERMAP	erythroblast membrane associated protein (Scianna blood group)	2.63189	0.274965	0.907575	2.51293	0.268235	1.36672e-06	-2.45942	2.63189	0.274965	2.03529	3.6832	0.516179	1.01161	2.91064	2.61456	5.56502	5.13801
ENSCSAG00000012912	NAALADL2		2.62267	0.231667	0.879821	2.62267	0.231667	2.58494	2.37204e-06	2.63487	0.21167	2.03529	3.6832	1.54854	2.02322	0	1.30728	0.795002	2.56901
ENSCSAG00000002969	ANKRD37	ankyrin repeat domain 37	2.60655	0.165596	0.812208	2.60655	0.165596	1.32193	-1.22239	2.66645	0.156797	6.10588	3.6832	1.03236	2.02322	1.45532	2.61456	2.38501	5.13801
ENSCSAG00000019717	ADRB2	adrenoceptor beta 2	2.60559	0.157179	0.801629	2.60559	0.157179	1.73696	-0.80735	2.6213	0.146097	6.10588	3.6832	3.09708	0.505804	2.91064	0	1.59	5.13801
ENSCSAG00000004455	TMEM150C	transmembrane protein 150C	2.59286	0.128413	0.770664	2.59286	0.128413	3.16991	0.584964	2.58685	0.106092	2.03529	7.36639	2.5809	6.06965	1.45532	0	3.97501	1.92675
ENSCSAG00000006619			2.54805	0.140111	0.780108	2.54805	0.140111	3.70042	1.16992	2.54856	0.0730455	9.15882	3.6832	2.5809	5.56384	0	1.30728	2.38501	1.92675
ENSCSAG00000008406	PFN4	profilin family member 4	2.54539	0.246263	0.891255	2.54539	0.246263	0.678071	-1.80735	2.6839	0.237537	1.01765	7.36639	1.03236	1.01161	4.36597	1.30728	3.97501	2.56901
ENSCSAG00000014755	CDH22		2.52999	0.217569	0.868054	2.55586	0.202077	2.32191	-0.222389	2.52999	0.217569	1.01765	3.6832	2.5809	2.52902	1.45532	0	5.56502	0.642252
ENSCSAG00000003836	NTS	neurotensin	2.47964	0.0129353	0.324945	2.47964	0.0129353	4.58495	2.10434	2.48141	0.000305604	22.3882	25.7824	19.0986	23.7728	1.45532	1.30728	4.77001	5.13801
ENSCSAG00000017402	TENT5A	terminal nucleotidyltransferase 5A	2.44963	0.123428	0.768424	2.44963	0.123428	3.58494	1.1375	2.45355	0.0697072	5.08823	7.36639	5.16179	6.06965	0	1.30728	1.59	2.56901
ENSCSAG00000005198	DLX3	distal-less homeobox 3	2.41504	0.193088	0.84087	2.41504	0.193088	3.80733	1.41503	2.4258	0.0929302	3.05294	11.0496	4.12943	3.54063	0	1.30728	2.38501	1.2845
ENSCSAG00000002709	APOA1	apolipoprotein A1	2.40695	0.0547586	0.603016	2.40695	0.0547586	3.70042	1.28951	2.39449	0.0299855	6.10588	7.36639	10.8398	11.1277	1.45532	0	5.56502	2.56901
ENSCSAG00000000668	HES4	hes family bHLH transcription factor 4	2.40628	0.123999	0.768424	2.40628	0.123999	3.05889	0.678072	2.42748	0.0611853	3.05294	22.0992	5.16179	3.03482	0	2.61456	1.59	2.56901
ENSCSAG00000006839	PLAAT4	phospholipase A and acyltransferase 4	2.4049	0.389603	0.949397	2.4049	0.389603	0.999995	-1.41503	2.80846	0.320311	4.07058	0	0.516179	1.51741	1.45532	1.30728	4.77001	2.56901
ENSCSAG00000004170	ZNF585B		2.37219	0.108657	0.746461	2.33596	0.0971185	0.906891	-1.41503	2.37219	0.108657	4.07058	11.0496	2.06472	4.04643	4.36597	3.92184	5.56502	9.63377
ENSCSAG00000009247			2.35752	0.0046801	0.191728	2.33678	0.00443167	1.88042	-0.45943	2.35752	0.0046801	11.1941	69.9807	11.3559	12.6451	13.0979	9.15097	15.9	17.3408
ENSCSAG00000006454			2.35402	0.10007	0.733107	2.35402	0.10007	2.16992	-0.169923	2.37808	0.0823056	3.05294	14.7328	3.61325	3.54063	1.45532	2.61456	5.56502	2.56901
ENSCSAG00000019416	GCNT4	glucosaminyl (N-acetyl) transferase 4	2.35041	0.323616	0.927679	2.35041	0.323616	1.32192	-0.999994	2.39326	0.322417	1.01765	3.6832	1.03236	1.51741	1.45532	1.30728	3.18001	2.56901
ENSCSAG00000019429	POU3F3		2.35041	0.323338	0.927317	2.35041	0.323338	1.32192	-0.999994	2.39326	0.322417	1.01765	3.6832	1.03236	2.02322	1.45532	1.30728	1.59	3.85351
ENSCSAG00000019297	C6orf141	chromosome unknown C6orf141 homolog	2.33049	0.249041	0.894158	2.33049	0.249041	2.58495	0.263036	2.32239	0.239545	2.03529	3.6832	4.64561	1.01161	0	1.30728	3.97501	1.2845
ENSCSAG00000005544			2.32823	0.450403	0.960103	2.32823	0.450403	1.58495	-0.736959	2.77675	0.360057	3.05294	0	1.54854	0.505804	1.45532	0	2.38501	2.56901
ENSCSAG00000007865	SLC17A4		2.32822	0.0324098	0.484131	2.34429	0.0295593	2.70043	0.353638	2.32822	0.0324098	6.10588	7.36639	12.3883	10.6219	1.45532	1.30728	7.95002	9.63377
ENSCSAG00000019715			2.31816	0.0731361	0.669605	2.31332	0.0646659	1.80735	-0.502498	2.31816	0.0731361	10.1765	3.6832	5.67797	6.06965	2.91064	1.30728	8.74503	8.34927
ENSCSAG00000004898		zinc finger protein 91-like	2.30851	0.217291	0.868054	2.21351	0.201287	-0.137502	-2.32192	2.30851	0.217291	6.10588	3.6832	1.54854	1.01161	2.91064	7.84369	8.74503	5.78026
ENSCSAG00000015792			2.3081	0.357221	0.937923	2.3081	0.357221	2.32191	2.31319e-06	2.63751	0.286438	5.08823	0	2.06472	1.51741	1.45532	0	1.59	1.92675
ENSCSAG00000002108	SHANK1		2.29651	0.571026	0.988621	2.29651	0.571026	0.999994	-2.32191	2.83006	0.440425	0	3.6832	1.03236	0	1.45532	1.30728	1.59	2.56901
ENSCSAG00000019470			2.27258	0.062141	0.634833	2.27258	0.062141	3.80734	1.53051	2.25783	0.0287885	7.12352	7.36639	11.8721	13.6567	0	1.30728	1.59	7.06477
ENSCSAG00000013333			2.27256	0.201505	0.847609	2.23455	0.19383	0.736965	-1.45943	2.27256	0.201505	3.05294	7.36639	2.06472	1.51741	1.45532	5.22912	3.18001	7.70702
ENSCSAG00000005921	MAB21L4	mab-21 like 4	2.25614	0.0688726	0.659867	2.25614	0.0688726	1.72247	-0.514571	2.29379	0.0492457	7.12352	25.7824	4.64561	1.51741	5.82129	3.92184	7.15502	2.56901
ENSCSAG00000015645	PAEP		2.24547	0.0882216	0.708143	2.23568	0.0872395	1.58496	-0.637427	2.24547	0.0882216	8.14117	7.36639	3.61325	5.05804	4.36597	1.30728	9.54003	3.85351
ENSCSAG00000004949	NLRC5	NLR family CARD domain containing 5	2.22174	0.432347	0.955399	2.22174	0.432347	0.999995	-1.22238	2.61683	0.352274	0	3.6832	1.54854	0.505804	1.45532	1.30728	3.97501	3.21126
ENSCSAG00000011119	TBXA2R	thromboxane A2 receptor	2.21737	0.190746	0.838987	2.21737	0.190746	2.80734	0.584964	2.20832	0.176484	3.05294	3.6832	4.64561	3.54063	0	1.30728	3.18001	2.56901
ENSCSAG00000005244	CFAP58	cilia and flagella associated protein 58	2.21386	0.296315	0.915287	2.19305	0.283019	0.999998	-1.16992	2.21386	0.296315	2.03529	3.6832	1.03236	2.52902	0	2.61456	3.18001	6.42252
ENSCSAG00000009092	ADAMTS5	ADAM metallopeptidase with thrombospondin type 1 motif 5	2.20534	0.206971	0.854752	2.20534	0.206971	1.58496	-0.584959	2.25484	0.180155	5.08823	7.36639	1.03236	2.52902	1.45532	2.61456	1.59	4.49576
ENSCSAG00000016631	FST	follistatin	2.19586	0.327925	0.928953	2.798	0.234454	0.999998	-0.999982	2.19586	0.327925	1.01765	7.36639	1.03236	1.01161	4.36597	0	3.97501	0
ENSCSAG00000018932			2.18882	0.0353025	0.502683	2.15436	0.0238558	-0.112474	-2.25634	2.18882	0.0353025	11.1941	25.7824	3.09708	6.06965	13.0979	27.4529	23.8501	19.2675
ENSCSAG00000008392	MAMDC2	MAM domain containing 2	2.18806	0.199647	0.846655	2.22223	0.194206	2.58495	0.362572	2.18806	0.199647	2.03529	3.6832	4.64561	4.04643	0	1.30728	3.97501	3.21126
ENSCSAG00000018519			2.18017	0.0523062	0.596485	2.18017	0.0523062	3.61891	1.44057	2.20186	0.00560032	16.2823	69.9807	8.77505	9.61028	5.82129	1.30728	3.18001	4.49576
ENSCSAG00000008639	BCL2L14	BCL2 like 14	2.16907	0.154378	0.799631	2.13192	0.128756	0.347924	-1.7776	2.16907	0.154378	10.1765	3.6832	5.67797	1.01161	2.91064	7.84369	14.31	10.276
ENSCSAG00000002530	HOXB4	homeobox B4	2.16884	0.200544	0.846655	2.16884	0.200544	4.1699	1.99999	2.18495	0.0641147	7.12352	11.0496	6.19415	5.56384	1.45532	0	2.38501	1.2845
ENSCSAG00000009703	MMRN2	multimerin 2	2.1655	0.162845	0.8098	2.1655	0.162845	3.16991	1	2.15331	0.127373	5.08823	3.6832	5.67797	5.56384	0	1.30728	3.18001	3.21126
ENSCSAG00000003319	ZNF285		2.1653	0.181977	0.828108	2.1653	0.181977	2.16992	2.33694e-06	2.17918	0.177292	2.03529	7.36639	4.12943	3.54063	1.45532	1.30728	4.77001	2.56901
ENSCSAG00000012544	NEBL		2.15881	0.488072	0.968291	2.15881	0.488072	-0.321925	-2.45942	2.62042	0.391635	0	3.6832	0.516179	0.505804	1.45532	3.92184	4.77001	5.78026
ENSCSAG00000002844	KRT39	keratin 39	2.15629	0.467406	0.961245	2.15629	0.467406	0.99999	-1.16992	2.70374	0.36777	2.03529	0	1.54854	2.02322	1.45532	0	6.36002	3.21126
ENSCSAG00000019126			2.15338	0.462794	0.961111	2.15338	0.462794	-1.37851	-4.52354	2.308	0.432893	1.01765	3.6832	1.03236	0	5.82129	6.53641	12.72	9.63377
ENSCSAG00000002788			2.15325	0.473324	0.962678	2.15325	0.473324	0.321928	-2.80734	2.30483	0.435821	1.01765	3.6832	0.516179	0	1.45532	2.61456	3.97501	3.21126
ENSCSAG00000002240	FLI1	Fli-1 proto-oncogene, ETS transcription factor	2.15136	0.164172	0.811211	2.15136	0.164172	1.90689	-0.22239	2.18107	0.135432	4.07058	11.0496	2.5809	2.52902	1.45532	2.61456	3.97501	3.21126
ENSCSAG00000005231	SGCA		2.14298	0.356754	0.937923	2.14298	0.356754	1.58495	-0.584958	2.52937	0.299529	3.05294	0	4.12943	1.51741	0	1.30728	6.36002	2.56901
ENSCSAG00000015851	DUSP4	dual specificity phosphatase 4	2.14183	0.199403	0.846655	2.14183	0.199403	2.11547	2.31197e-06	2.1647	0.163322	6.10588	7.36639	1.03236	4.55224	0	2.61456	3.18001	3.21126
ENSCSAG00000011372	FTCDNL1		2.1338	0.148183	0.78623	2.11204	0.144899	1.70044	-0.415035	2.1338	0.148183	2.03529	11.0496	2.5809	6.06965	2.91064	1.30728	4.77001	7.06477
ENSCSAG00000004235	ZNF565	zinc finger protein 565	2.13273	0.114939	0.755854	2.09334	0.0974702	0.304855	-1.7776	2.13273	0.114939	3.05294	18.416	3.09708	3.54063	4.36597	13.0728	9.54003	14.1295
ENSCSAG00000004444			2.13207	0.11439	0.755854	2.10854	0.107023	1.19264	-0.906888	2.13207	0.11439	5.08823	11.0496	3.09708	4.55224	4.36597	2.61456	7.15502	8.34927
ENSCSAG00000008109	UBASH3A		2.11847	0.200566	0.846655	2.12263	0.178365	1.41503	-0.700436	2.11847	0.200566	4.07058	3.6832	1.54854	5.56384	0	2.61456	7.15502	5.78026
ENSCSAG00000018524	PNMA2		2.11441	0.0255047	0.439706	2.11441	0.0255047	2.58496	0.485428	2.11271	0.00716459	22.3882	25.7824	10.8398	9.61028	7.27661	1.30728	11.13	3.85351
ENSCSAG00000010030		bis(5'-nucleosyl)-tetraphosphatase [asymmetrical]	2.09547	0.0199875	0.394882	2.09547	0.0199875	2.35755	0.263036	2.10473	0.012674	12.2118	29.4656	10.8398	13.1509	4.36597	3.92184	11.925	7.70702
ENSCSAG00000001869	NPR1	natriuretic peptide receptor 1	2.09226	0.591299	0.989183	2.09226	0.591299	0.999986	-0.584956	2.25175	0.542905	2.03529	0	1.03236	1.01161	1.45532	0	3.18001	0
ENSCSAG00000003536			2.0922	0.0243059	0.433366	2.0922	0.0243059	2.09311	1.24846e-06	2.11633	0.0164716	12.2118	51.5647	5.16179	12.6451	5.82129	9.15097	10.335	7.70702
ENSCSAG00000009067	OTOF	otoferlin	2.08889	0.382406	0.943602	2.08889	0.382406	1.41503	-0.584958	2.1847	0.327879	1.01765	7.36639	0.516179	0.505804	2.91064	0	1.59	0.642252
ENSCSAG00000010504			2.088	0.0924446	0.718499	2.04941	0.0701116	-0.283792	-2.32192	2.088	0.0924446	8.14117	14.7328	4.64561	1.51741	18.9192	9.15097	23.0551	12.2028
ENSCSAG00000018317	DDX3Y		2.06349	0.0147945	0.340931	2.06349	0.0147945	1.3356	-0.722464	2.07726	0.0147837	12.2118	40.5152	10.8398	9.10447	4.36597	16.9947	16.695	16.0563
ENSCSAG00000006605		F-box and WD repeat domain containing 9	2.06206	0.000688486	0.0569815	2.06206	0.000688486	2.28758	0.226772	2.06407	0.000238588	41.7235	40.5152	30.9708	24.2786	11.6426	5.22912	28.6201	17.983
ENSCSAG00000010194			2.06101	0.272414	0.904603	2.0258	0.272105	0.999999	-0.999995	2.06101	0.272414	4.07058	3.6832	1.54854	2.02322	1.45532	2.61456	6.36002	1.92675
ENSCSAG00000014322	MYBPH	myosin binding protein H	2.05941	0.419634	0.950638	2.05941	0.419634	1.99999	1.41001e-15	2.1958	0.327869	1.01765	7.36639	0.516179	1.01161	1.45532	1.30728	0.795002	1.2845
ENSCSAG00000001449		guanylate-binding protein 2	2.05911	0.181684	0.828108	2.05911	0.181684	3.16991	1.11548	2.03411	0.140579	5.08823	3.6832	5.67797	6.57545	1.45532	0	0.795002	5.13801
ENSCSAG00000004132	DPF1	double PHD fingers 1	2.05449	0.0374129	0.515203	2.05449	0.0374129	2.05063	1.51051e-06	2.06116	0.0299387	11.1941	18.416	10.3236	8.09286	2.91064	3.92184	10.335	7.70702
ENSCSAG00000000497	PROB1	proline rich basic protein 1	2.05206	0.473105	0.962678	2.05206	0.473105	-1.58496	-4.64383	2.46548	0.391583	0	7.36639	0	1.01161	11.6426	9.15097	15.9	8.99152
ENSCSAG00000018018	ZBTB7C	zinc finger and BTB domain containing 7C	2.04315	0.256139	0.894158	2.04315	0.256139	1.80735	-0.222389	2.03947	0.256133	3.05294	3.6832	3.09708	2.52902	1.45532	1.30728	5.56502	0.642252
ENSCSAG00000014267	HOXA3	homeobox A3	2.0406	0.00226822	0.125717	2.0406	0.00226822	2.07039	0.0339484	2.03976	0.001212	29.5117	33.1488	21.1634	21.7496	11.6426	2.61456	22.2601	19.9098
ENSCSAG00000017845	NHLRC3	NHL repeat containing 3	2.03949	0.00321594	0.154479	2.03949	0.00321594	2.23266	0.192646	2.03961	0.00273445	18.3176	29.4656	21.1634	27.3134	2.91064	6.53641	19.8751	21.8366
ENSCSAG00000004589	ZNF30		2.03652	0.415888	0.949547	2.03652	0.415888	1.50036e-06	-1.99999	2.15846	0.404018	1.01765	3.6832	1.03236	1.01161	4.36597	1.30728	4.77001	2.56901
ENSCSAG00000015048			2.02611	0.0286129	0.454577	2.02611	0.0286129	2.85798	0.830076	2.0267	0.0159793	11.1941	18.416	19.0986	12.6451	2.91064	1.30728	10.335	8.34927
ENSCSAG00000004645	CMTM3	CKLF like MARVEL transmembrane domain containing 3	2.02525	0.0010583	0.0767051	2.01742	0.000594331	0.584963	-1.42742	2.02525	0.0010583	36.6353	58.9311	13.9368	15.1741	24.7405	39.2184	34.9801	43.0309
ENSCSAG00000016178	ZNF107		2.01908	0.520075	0.97319	2.01908	0.520075	-0.321925	-2.32192	2.48009	0.415196	0	3.6832	1.03236	1.01161	1.45532	3.92184	4.77001	5.13801
ENSCSAG00000017358	NEURL3	neuralized E3 ubiquitin protein ligase 3	2.00996	0.294782	0.914548	2.00996	0.294782	1.99999	2.15107e-06	2.03834	0.269323	4.07058	3.6832	3.61325	1.01161	1.45532	1.30728	3.18001	1.92675
ENSCSAG00000019248	PCED1B	PC-esterase domain containing 1B	1.99402	0.0797903	0.689927	1.99402	0.0797903	2.08746	0.0931111	1.99589	0.0744081	10.1765	7.36639	7.22651	9.10447	1.45532	2.61456	5.56502	8.99152
ENSCSAG00000001914	CACNG8		1.9925	0.490705	0.968928	1.9925	0.490705	1.99998	1.717e-06	2.39602	0.392102	0	3.6832	1.03236	1.51741	0	1.30728	2.38501	0.642252
ENSCSAG00000019483	DNAJC30	DnaJ heat shock protein family (Hsp40) member C30	1.98462	0.00230772	0.127322	1.98462	0.00230772	4.18133	2.1964	1.98559	7.42238e-06	64.1117	62.6143	63.4901	47.0398	4.36597	2.61456	14.31	9.63377
ENSCSAG00000003655			1.98357	0.000738791	0.0587627	1.98357	0.000738791	3.23266	1.24998	1.98463	1.69826e-05	55.9705	84.7135	46.4561	42.4875	2.91064	11.7655	16.695	19.9098
ENSCSAG00000019309	FKBPL	FKBP prolyl isomerase like	1.98111	0.00190806	0.111827	1.98111	0.00190806	1.922	-0.0577146	1.98418	0.00153952	24.4235	47.8816	23.7442	24.7844	7.27661	11.7655	32.5951	17.983
ENSCSAG00000016527			1.98036	0.404024	0.949397	1.98036	0.404024	2.32191	0.321929	2.28275	0.325352	5.08823	0	3.09708	2.02322	0	1.30728	2.38501	1.92675
ENSCSAG00000007599	RBM24	RNA binding motif protein 24	1.97836	0.519207	0.97319	1.97836	0.519207	1.58495	-0.415033	2.46599	0.414745	3.05294	0	1.54854	1.01161	0	1.30728	0.795002	3.21126
ENSCSAG00000004886	ARHGAP9		1.96582	0.0743536	0.673637	1.95	0.0644904	0.943417	-0.999998	1.96582	0.0743536	7.12352	18.416	5.16179	6.57545	8.73193	3.92184	11.925	11.5605
ENSCSAG00000012703	RSPH3		1.95747	0.0254646	0.439706	1.94678	0.0241622	1.54749	-0.398548	1.95747	0.0254646	12.2118	25.7824	14.453	7.58706	5.82129	6.53641	17.4901	12.2028
ENSCSAG00000012288	CBARP		1.95033	0.102952	0.739165	1.93389	0.0854141	0.662965	-1.26303	1.95033	0.102952	8.14117	11.0496	4.64561	4.55224	4.36597	7.84369	13.515	10.276
ENSCSAG00000001603	ZNF8	zinc finger protein 8	1.94609	0.105417	0.744103	1.92079	0.0825882	2.86561	0.925999	1.94609	0.105417	54.9529	324.121	43.8752	51.0862	23.2852	28.7602	23.8501	26.3323
ENSCSAG00000012651	HACD1		1.93719	0.208175	0.85511	1.90732	0.198187	0.777608	-1.11547	1.93719	0.208175	5.08823	7.36639	2.06472	4.04643	5.82129	1.30728	7.15502	5.78026
ENSCSAG00000002634	DKKL1		1.93252	0.156159	0.801103	1.93252	0.156159	3.45941	1.51457	1.92475	0.106967	7.12352	3.6832	13.4207	6.57545	1.45532	0	3.18001	4.49576
ENSCSAG00000008521		DNA polymerase delta 4, accessory subunit	1.9306	0.0206825	0.402878	1.9306	0.0206825	2.15528	0.241011	1.91976	0.000752615	34.6	62.6143	29.4222	22.7612	18.9192	2.61456	31.8001	11.5605
ENSCSAG00000011927	DNAH7		1.93059	0.285668	0.911473	1.93059	0.285668	1.32193	-0.584959	1.99065	0.26218	3.05294	7.36639	1.54854	1.51741	2.91064	1.30728	3.18001	3.21126
ENSCSAG00000009493	KLRG1		1.92688	0.387395	0.946958	1.90227	0.386311	1.32192	-0.584958	1.92688	0.387395	1.01765	3.6832	2.06472	1.51741	1.45532	1.30728	3.18001	2.56901
ENSCSAG00000008749	PIK3IP1	phosphoinositide-3-kinase interacting protein 1	1.92235	0.411732	0.949547	1.92235	0.411732	2.32191	0.415037	1.93588	0.387404	1.01765	3.6832	1.54854	2.02322	0	1.30728	1.59	1.2845
ENSCSAG00000018470	CHST4	carbohydrate sulfotransferase 4	1.92235	0.418972	0.949919	1.92235	0.418972	2.32191	0.415037	1.93194	0.394591	1.01765	3.6832	3.09708	1.01161	1.45532	0	2.38501	1.2845
ENSCSAG00000017420	SH3BGRL2		1.91615	0.0559135	0.612314	1.91615	0.0559135	2.75488	0.836502	1.9208	0.0305021	12.2118	14.7328	12.9045	11.6335	1.45532	2.61456	7.95002	5.78026
ENSCSAG00000008422	APBA1	amyloid beta precursor protein binding family A member 1	1.91018	0.287937	0.912413	1.91018	0.287937	2.80734	0.874469	2.10827	0.22829	0	7.36639	5.67797	4.55224	0	1.30728	3.18001	3.21126
ENSCSAG00000017168	NPR3	natriuretic peptide receptor 3	1.90999	0.292631	0.913334	1.94401	0.271753	2.32191	0.362572	1.90999	0.292631	1.01765	3.6832	4.64561	4.04643	0	1.30728	3.18001	3.85351
ENSCSAG00000009427	PSMB9	proteasome 20S subunit beta 9	1.90108	0.295298	0.914703	1.90108	0.295298	2.58495	0.678072	1.88851	0.282591	2.03529	3.6832	3.61325	3.54063	0	1.30728	2.38501	3.21126
ENSCSAG00000015822	C7orf57		1.90108	0.30445	0.916719	1.90108	0.30445	2.58495	0.678072	1.88082	0.292924	2.03529	3.6832	5.67797	1.51741	1.45532	0	2.38501	2.56901
ENSCSAG00000010227	TMEM211	transmembrane protein 211	1.89326	0.157532	0.801737	1.89326	0.157532	2.75488	0.874469	1.91085	0.0779501	9.15882	18.416	7.22651	4.04643	2.91064	1.30728	3.97501	1.92675
ENSCSAG00000000116			1.89065	0.368365	0.939727	1.89065	0.368365	1.41503	-0.415034	1.93816	0.331094	4.07058	3.6832	1.54854	0.505804	0	2.61456	3.18001	1.2845
ENSCSAG00000009405	IKZF2	IKAROS family zinc finger 2	1.88491	0.282591	0.909931	1.90741	0.238904	0.999998	-0.906887	1.88491	0.282591	2.03529	3.6832	4.12943	3.54063	2.91064	0	7.95002	7.06477
ENSCSAG00000019293			1.87147	0.0417202	0.544229	1.87147	0.0417202	2.3505	0.473932	1.8895	0.0266585	10.1765	40.5152	9.80741	14.6683	7.27661	2.61456	8.74503	8.99152
ENSCSAG00000019635	FKRP	fukutin related protein	1.87001	0.0335216	0.491155	1.86279	0.0292519	1.18057	-0.67807	1.87001	0.0335216	16.2823	18.416	12.3883	8.09286	10.1873	5.22912	18.2851	14.1295
ENSCSAG00000014493	C2orf74	chromosome unknown C2orf74 homolog	1.86292	0.327799	0.928953	1.81785	0.317387	0.678072	-1.1375	1.86292	0.327799	1.01765	7.36639	1.54854	2.52902	1.45532	3.92184	6.36002	5.13801
ENSCSAG00000004226		solute carrier family 16 member 6	1.85447	0.403171	0.949397	1.85447	0.403171	1.16992	-0.584959	1.93554	0.339495	5.08823	3.6832	0.516179	1.01161	0	3.92184	1.59	1.2845
ENSCSAG00000002795	PPP1R15A		1.85172	0.116266	0.755854	1.8392	0.0815052	0.136322	-1.70671	1.85172	0.116266	37.6529	206.259	22.1957	31.3599	101.873	120.27	100.965	71.9322
ENSCSAG00000018501	GCNT1	glucosaminyl (N-acetyl) transferase 1	1.85095	0.289527	0.912413	1.85095	0.289527	3.16991	1.32193	1.83896	0.225708	2.03529	7.36639	4.64561	4.55224	0	1.30728	0.795002	3.21126
ENSCSAG00000000862	PADI1	peptidyl arginine deiminase 1	1.83741	0.288417	0.912413	1.76423	0.285278	0.289508	-1.45943	1.83741	0.288417	7.12352	3.6832	1.03236	3.03482	5.82129	2.61456	7.15502	3.85351
ENSCSAG00000002940	FAM149A	family with sequence similarity 149 member A	1.83252	0.290021	0.912413	1.79273	0.239425	-1.95935	-3.74415	1.83252	0.290021	5.08823	3.6832	2.06472	2.52902	13.0979	22.2238	34.1851	32.7548
ENSCSAG00000011676	C15orf65	chromosome unknown C15orf65 homolog	1.82595	0.202014	0.848293	1.82595	0.202014	3.90687	2.07039	1.82351	0.0985747	4.07058	11.0496	10.8398	10.1161	0	1.30728	2.38501	3.21126
ENSCSAG00000004798	SYCE3	synaptonemal complex central element protein 3	1.8249	0.049723	0.584508	1.8249	0.049723	2	0.176879	1.82382	0.0434353	10.1765	18.416	17.0339	8.59867	5.82129	1.30728	14.31	8.99152
ENSCSAG00000015479			1.82224	0.234668	0.882545	1.82224	0.234668	0.807355	-0.999996	1.87623	0.229089	3.05294	11.0496	2.06472	2.52902	2.91064	5.22912	7.15502	3.21126
ENSCSAG00000008206	PRR3	proline rich 3	1.82118	0.0571386	0.619254	1.82118	0.0571386	2.04439	0.222394	1.8315	0.0430109	11.1941	22.0992	8.25887	13.1509	2.91064	5.22912	11.925	6.42252
ENSCSAG00000011787	FAM155B	family with sequence similarity 155 member B	1.82018	0.177287	0.823709	1.82018	0.177287	1.15528	-0.67807	1.93042	0.144385	1.01765	47.8816	2.5809	1.51741	13.0979	9.15097	4.77001	3.21126
ENSCSAG00000013178			1.81907	0.000443141	0.0441303	1.81515	7.74598e-05	-0.80023	-2.61298	1.81907	0.000443141	52.9176	62.6143	26.8413	24.2786	129.524	71.9005	163.77	148.36
ENSCSAG00000011597	C22orf39	chromosome unknown C22orf39 homolog	1.81566	0.0956876	0.725295	1.81566	0.0956876	2.20163	0.387025	1.8233	0.0703372	12.2118	11.0496	8.25887	9.10447	1.45532	3.92184	5.56502	7.06477
ENSCSAG00000007524	PHACTR1		1.81369	0.419973	0.950787	1.81369	0.419973	1.16992	-0.584959	1.9374	0.349928	2.03529	7.36639	1.03236	1.01161	2.91064	1.30728	1.59	1.2845
ENSCSAG00000014404	WFDC2	WAP four-disulfide core domain 2	1.80677	0.362038	0.938107	1.72282	0.359835	-0.169923	-1.87446	1.80677	0.362038	4.07058	3.6832	1.03236	2.02322	4.36597	5.22912	7.15502	3.85351
ENSCSAG00000019624	BLOC1S3	biogenesis of lysosomal organelles complex 1 subunit 3	1.79327	0.0246758	0.434864	1.79327	0.0246758	1.97575	0.184426	1.80398	0.0132769	22.3882	36.832	12.3883	13.1509	7.27661	7.84369	14.31	8.34927
ENSCSAG00000003769	ZNF546		1.78792	0.0714473	0.664005	1.77166	0.0560303	0.632269	-1.1375	1.78792	0.0714473	9.15882	22.0992	9.29123	5.56384	10.1873	10.4582	16.695	16.0563
ENSCSAG00000001948	IL6R		1.77074	0.0281297	0.451491	1.75721	0.0253198	1.21299	-0.544319	1.77074	0.0281297	14.247	36.832	10.3236	13.6567	8.73193	13.0728	19.0801	16.0563
ENSCSAG00000009359	PLD5	phospholipase D family member 5	1.77022	0.0922746	0.718089	1.77022	0.0922746	2.88752	1.12553	1.76972	0.0322147	15.2647	22.0992	11.8721	12.1393	0	5.22912	3.97501	7.06477
ENSCSAG00000011813	ZBTB37	zinc finger and BTB domain containing 37	1.76939	0.0299574	0.463904	1.76007	0.028444	1.10434	-0.652075	1.76939	0.0299574	25.4412	18.416	11.8721	8.59867	5.82129	14.3801	17.4901	16.0563
ENSCSAG00000006679	GBX1		1.7663	0.581354	0.989047	1.7663	0.581354	0.415036	-1.32192	2.22752	0.463022	0	3.6832	0.516179	0.505804	0	2.61456	2.38501	2.56901
ENSCSAG00000010290	C15orf48	chromosome unknown C15orf48 homolog	1.7663	0.063604	0.640169	1.7663	0.063604	3.04439	1.28011	1.76244	0.0241802	15.2647	18.416	17.5501	15.6799	2.91064	1.30728	9.54003	4.49576
ENSCSAG00000006692	ZNF69		1.76145	0.482283	0.965539	1.76145	0.482283	-0.263032	-1.99999	1.90203	0.46059	1.01765	3.6832	0.516179	0.505804	2.91064	2.61456	6.36002	1.92675
ENSCSAG00000007681	NYAP2		1.76021	0.197492	0.846424	1.76021	0.197492	2.32192	0.777608	1.56087	0.184012	5.08823	14.7328	6.71033	4.55224	2.91064	1.30728	0	7.06477
ENSCSAG00000000133			1.75907	0.036867	0.512061	1.75907	0.036867	1.88452	0.131246	1.76682	0.0215596	22.3882	25.7824	12.3883	11.1277	2.91064	10.4582	8.74503	12.2028
ENSCSAG00000008667	CDK2AP2	cyclin dependent kinase 2 associated protein 2	1.75671	0.0571387	0.619254	1.75671	0.0571387	2.36923	0.607684	1.75941	0.0439662	24.4235	7.36639	15.4854	16.6915	2.91064	2.61456	15.9	5.13801
ENSCSAG00000007528	IVD		1.75362	0.453312	0.960103	1.75362	0.453312	0.321928	-1.41503	1.8063	0.448947	1.01765	3.6832	0.516179	1.51741	1.45532	2.61456	2.38501	5.78026
ENSCSAG00000019224			1.75154	0.142106	0.780108	1.73523	0.0952195	-0.78427	-2.51785	1.75154	0.142106	11.1941	7.36639	5.67797	5.05804	14.5532	15.6874	31.0051	32.1126
ENSCSAG00000014786	FIBCD1	fibrinogen C domain containing 1	1.75014	0.284755	0.910221	1.75014	0.284755	1.73696	2.35942e-06	1.76047	0.265264	3.05294	7.36639	2.5809	4.04643	2.91064	0	3.97501	2.56901
ENSCSAG00000017745	NUDT15	nudix hydrolase 15	1.75014	0.149349	0.789884	1.72607	0.134248	0.652077	-1.07039	1.75014	0.149349	7.12352	14.7328	8.25887	1.51741	8.73193	5.22912	8.74503	12.2028
ENSCSAG00000001726	ZNF784	zinc finger protein 784	1.74643	0.00290584	0.142946	1.74643	0.00290584	2.10434	0.353638	1.75572	0.0025062	29.5117	99.4463	36.1325	33.3831	16.0085	14.3801	27.8251	26.3323
ENSCSAG00000006993	VEGFB	vascular endothelial growth factor B	1.74506	0.0238668	0.431686	1.73739	0.00903923	-1.04103	-2.77761	1.74506	0.0238668	15.2647	36.832	16.0016	12.1393	61.1235	45.7548	115.275	77.0702
ENSCSAG00000015709	SPATA17	spermatogenesis associated 17	1.7381	0.272297	0.904603	1.7381	0.272297	2.58495	0.847997	1.75035	0.209958	5.08823	7.36639	3.61325	4.55224	1.45532	1.30728	2.38501	3.21126
ENSCSAG00000001389	SLC44A5		1.73267	0.0152417	0.349238	1.73267	0.0152417	2.04439	0.313159	1.73559	0.00832363	22.3882	44.1984	21.1634	20.2322	2.91064	13.0728	16.695	16.0563
ENSCSAG00000018441	FGFBP3	fibroblast growth factor binding protein 3	1.72927	0.153648	0.798151	1.72927	0.153648	1.58496	-0.137502	1.75543	0.129615	6.10588	18.416	4.64561	5.05804	2.91064	5.22912	7.15502	3.85351
ENSCSAG00000018823	VMAC		1.72551	0.364036	0.939727	1.72551	0.364036	1.99999	0.263036	1.76546	0.336768	1.01765	7.36639	3.61325	2.02322	1.45532	1.30728	3.18001	1.92675
ENSCSAG00000018853	SNN	stannin	1.72367	0.358201	0.937923	1.70598	0.321289	-0.514571	-2.20163	1.72367	0.358201	3.05294	3.6832	3.09708	1.51741	8.73193	1.30728	11.13	12.2028
ENSCSAG00000010621	HMGN5	high mobility group nucleosome binding domain 5	1.71227	0.0146831	0.340931	1.71227	0.0146831	4.4185	2.70044	1.7212	0.000480533	61.0588	217.309	61.4253	68.7894	4.36597	9.15097	13.515	6.42252
ENSCSAG00000015618	C9orf116	chromosome unknown C9orf116 homolog	1.71028	0.0591899	0.623978	1.71028	0.0591899	2.64385	0.929612	1.70577	0.0418531	18.3176	7.36639	21.1634	18.7147	0	3.92184	11.925	8.99152
ENSCSAG00000013803	DNAH11		1.70483	0.14434	0.783348	1.70483	0.14434	1.45943	-0.241006	1.72289	0.130671	7.12352	14.7328	6.19415	5.05804	2.91064	5.22912	7.95002	5.13801
ENSCSAG00000003758	MAP3K10	mitogen-activated protein kinase kinase kinase 10	1.70477	0.297302	0.915558	1.62994	0.250826	-3.26052	-4.88264	1.70477	0.297302	5.08823	7.36639	2.06472	1.51741	77.1321	37.9112	69.1652	48.8111
ENSCSAG00000002435	CFAP73	cilia and flagella associated protein 73	1.70291	0.627754	0.991443	1.70291	0.627754	0.999989	-0.736959	2.32688	0.482794	2.03529	0	2.06472	0.505804	1.45532	0	1.59	3.21126
ENSCSAG00000003387	NECAB2		1.69473	0.370125	0.940393	1.71273	0.338639	0.584962	-1.11547	1.69473	0.370125	2.03529	3.6832	3.61325	2.02322	0	3.92184	7.15502	6.42252
ENSCSAG00000006519	TOMM22	translocase of outer mitochondrial membrane 22	1.69039	0.0014858	0.0963654	1.68629	0.000355327	-0.1676	-1.85316	1.69039	0.0014858	41.7235	95.7631	31.4869	31.3599	84.4087	70.5932	128.79	95.0532
ENSCSAG00000006088	SCLY	selenocysteine lyase	1.68098	0.0326248	0.484704	1.68098	0.0326248	2.58496	0.902704	1.68115	0.0166553	24.4235	18.416	23.7442	19.2206	4.36597	2.61456	12.72	10.276
ENSCSAG00000006064	ERFE	erythroferrone	1.67882	0.302513	0.916719	1.67882	0.302513	3.70043	2	1.72871	0.135249	4.07058	22.0992	7.22651	5.05804	1.45532	1.30728	1.59	1.2845
ENSCSAG00000019601			1.67231	0.510414	0.97319	1.67231	0.510414	-4.14295	-6.82015	1.8696	0.481462	2.03529	3.6832	0	0.505804	42.2043	64.0568	63.6002	49.4534
ENSCSAG00000005100	ARL9		1.6716	0.0179922	0.374806	1.6716	0.0179922	2.76939	1.0902	1.67932	0.00998589	16.2823	58.9311	33.0355	32.8773	5.82129	5.22912	13.515	16.6985
ENSCSAG00000017720	CDADC1		1.67062	0.157876	0.802417	1.66315	0.127484	0.502501	-1.15754	1.67062	0.157876	6.10588	11.0496	8.25887	4.55224	2.91064	9.15097	12.72	16.0563
ENSCSAG00000018077			1.67006	0.7758	0.999894	1.67006	0.7758	0.999987	-1.32192	2.32176	0.574647	2.03529	0	2.06472	0	0	1.30728	1.59	3.21126
ENSCSAG00000019488	MBLAC1	metallo-beta-lactamase domain containing 1	1.66864	0.0296683	0.463156	1.66864	0.0296683	1.33342	-0.334418	1.68395	0.0266802	22.3882	40.5152	16.0016	6.57545	11.6426	13.0728	14.31	15.414
ENSCSAG00000003838	FAM241A	family with sequence similarity 241 member A	1.66395	0.240437	0.886074	1.66395	0.240437	1.65208	1.80302e-06	1.7073	0.189558	4.07058	18.416	4.12943	2.52902	5.82129	1.30728	3.97501	2.56901
ENSCSAG00000014556	WIPF1	WAS/WASL interacting protein family member 1	1.65778	0.0701018	0.66265	1.65778	0.0701018	3.02553	1.36923	1.66556	0.0160488	30.5294	25.7824	13.9368	16.6915	4.36597	2.61456	3.97501	8.34927
ENSCSAG00000004467	RASGEF1B		1.65435	0.259536	0.896337	1.68113	0.228636	1.80735	0.115479	1.65435	0.259536	3.05294	3.6832	8.25887	5.05804	1.45532	1.30728	7.15502	5.13801
ENSCSAG00000010649	SHD	Src homology 2 domain containing transforming protein D	1.6516	0.156757	0.801208	1.6516	0.156757	2	0.347925	1.66799	0.120982	9.15882	14.7328	3.61325	9.61028	1.45532	5.22912	4.77001	5.78026
ENSCSAG00000018796			1.64655	0.329688	0.928953	1.57888	0.319029	-0.241006	-1.80735	1.64655	0.329688	4.07058	7.36639	2.06472	2.02322	5.82129	6.53641	7.15502	7.06477
ENSCSAG00000012366			1.64267	0.0910016	0.71284	1.64267	0.0910016	1.71621	0.0703907	1.64949	0.0884208	12.2118	11.0496	13.4207	7.58706	4.36597	2.61456	10.335	10.276
ENSCSAG00000014513	EXOG		1.63093	0.178872	0.824694	1.63093	0.178872	1.28011	-0.347921	1.64784	0.176768	10.1765	7.36639	7.22651	4.04643	2.91064	3.92184	10.335	4.49576
ENSCSAG00000011506	GNG7	G protein subunit gamma 7	1.63085	0.244709	0.890625	1.63085	0.244709	2.99998	1.36257	1.60008	0.214319	4.07058	3.6832	7.74269	9.61028	0	1.30728	2.38501	5.13801
ENSCSAG00000003105	NOVA2		1.62777	0.0520969	0.594721	1.62777	0.0520969	2.5502	0.921998	1.6295	0.0265177	19.3353	22.0992	15.4854	20.738	2.91064	3.92184	10.335	8.99152
ENSCSAG00000016535	CCNO		1.62682	0.363572	0.939727	1.62682	0.363572	1.32193	-0.321925	1.79909	0.320924	10.1765	0	2.06472	5.56384	0	3.92184	6.36002	4.49576
ENSCSAG00000013089		protein SET-like	1.62633	0.572186	0.989047	1.62633	0.572186	-1.90688	-3.54431	2.03864	0.463807	0	3.6832	0.516179	1.51741	7.27661	7.84369	19.8751	15.414
ENSCSAG00000015467	UBE2D4	ubiquitin conjugating enzyme E2 D4 (putative)	1.61016	0.288363	0.912413	1.59125	0.237101	-0.999998	-2.58496	1.61016	0.288363	7.12352	3.6832	4.12943	3.03482	11.6426	10.4582	22.2601	19.9098
ENSCSAG00000014934	MST1	macrophage stimulating 1	1.60054	0.420548	0.950841	1.60054	0.420548	0.999998	-0.584958	1.66079	0.401253	1.01765	7.36639	2.06472	2.02322	4.36597	0	3.18001	2.56901
ENSCSAG00000008842	NXT2	nuclear transport factor 2 like export factor 2	1.59827	0.0753669	0.677009	1.59053	0.0753607	1.39855	-0.192644	1.59827	0.0753669	14.247	14.7328	10.3236	11.1277	5.82129	5.22912	11.925	11.5605
ENSCSAG00000001115	MANEAL	mannosidase endo-alpha like	1.58382	0.166619	0.812517	1.58382	0.166619	1.67807	0.0931111	1.58688	0.162285	9.15882	7.36639	9.80741	5.56384	4.36597	1.30728	4.77001	10.276
ENSCSAG00000006139	EPHX3		1.58181	0.213011	0.863109	1.58181	0.213011	2.93859	1.36257	1.58347	0.117084	8.14117	14.7328	10.3236	8.09286	0	2.61456	1.59	5.13801
ENSCSAG00000010900	FAT2	FAT atypical cadherin 2	1.5818	0.184038	0.831722	1.5818	0.184038	2.48542	0.906891	1.59534	0.10737	10.1765	18.416	7.74269	7.08126	4.36597	1.30728	4.77001	3.21126
ENSCSAG00000013680	EEF1AKMT4	EEF1A lysine methyltransferase 4	1.58029	0.00796718	0.256816	1.58029	0.00796718	2.21791	0.637431	1.58452	0.00225432	47.8294	58.9311	29.4222	27.3134	13.0979	10.4582	20.6701	15.414
ENSCSAG00000004104	APOH		1.58002	0.00154674	0.0976597	1.58002	0.00154674	3.01123	1.43105	1.57992	9.80519e-05	59.0235	69.9807	73.2975	77.8938	11.6426	3.92184	25.4401	31.4703
ENSCSAG00000001205	PLK3	polo like kinase 3	1.57997	0.251969	0.894158	1.57997	0.251969	0.87447	-0.678069	1.62808	0.214146	15.2647	7.36639	2.06472	2.52902	8.73193	2.61456	5.56502	1.92675
ENSCSAG00000015431	TTC6	tetratricopeptide repeat domain 6	1.57787	0.310255	0.921218	1.53109	0.288794	-0.280106	-1.80735	1.57787	0.310255	3.05294	11.0496	4.64561	0.505804	4.36597	13.0728	11.13	10.276
ENSCSAG00000019754	PGBD4	piggyBac transposable element derived 4	1.57405	0.40438	0.949397	1.57405	0.40438	1.58496	2.23155e-06	1.59064	0.402635	2.03529	3.6832	1.54854	3.54063	1.45532	1.30728	3.18001	3.21126
ENSCSAG00000010013	CLPSL2	colipase like 2	1.5736	0.456464	0.960103	1.5736	0.456464	0.807354	-0.736961	1.63729	0.428422	3.05294	3.6832	1.03236	2.02322	2.91064	1.30728	0.795002	3.85351
ENSCSAG00000009535	HORMAD2		1.57076	0.39427	0.949397	1.57076	0.39427	2.16992	0.584963	1.61385	0.342806	2.03529	7.36639	3.09708	3.03482	1.45532	1.30728	2.38501	1.92675
ENSCSAG00000016047	TRABD2A	TraB domain containing 2A	1.57031	0.632658	0.99289	1.57031	0.632658	0.999994	-0.584958	2.07184	0.49227	0	3.6832	1.03236	1.01161	1.45532	1.30728	2.38501	0.642252
ENSCSAG00000015294	INHBA	inhibin subunit beta A	1.56989	0.0978343	0.729825	1.56989	0.0978343	2.24286	0.678073	1.59033	0.0343159	29.5117	40.5152	10.8398	5.05804	7.27661	7.84369	5.56502	3.85351
ENSCSAG00000001778		gonadotropin-releasing hormone II receptor	1.56957	0.479564	0.963928	1.55389	0.47693	0.736964	-0.80735	1.56957	0.479564	1.01765	3.6832	2.06472	1.51741	0	2.61456	3.18001	3.85351
ENSCSAG00000005875			1.56957	0.0603068	0.628553	1.56957	0.0603068	2.03562	0.465665	1.5752	0.0395611	19.3353	22.0992	16.0016	12.6451	7.27661	2.61456	11.13	10.276
ENSCSAG00000016853	LIMS2	LIM zinc finger domain containing 2	1.56658	0.0677189	0.655451	1.56658	0.0677189	3.42146	1.85415	1.57188	0.00932244	30.5294	44.1984	18.5825	28.325	4.36597	2.61456	8.74503	4.49576
ENSCSAG00000014206			1.56525	0.473324	0.962678	1.56525	0.473324	2.32191	0.736964	1.58951	0.453666	1.01765	3.6832	1.54854	3.03482	0	1.30728	1.59	1.2845
ENSCSAG00000003006	NPAS1	neuronal PAS domain protein 1	1.5622	0.479691	0.963928	1.5622	0.479691	1.58495	2.67875e-06	1.93286	0.395832	3.05294	0	3.61325	2.52902	0	1.30728	4.77001	1.92675
ENSCSAG00000004745	INSC	INSC spindle orientation adaptor protein	1.56033	0.710663	0.999894	1.56033	0.710663	0.999987	-0.584956	2.25679	0.542898	2.03529	0	1.03236	1.01161	1.45532	0	0.795002	1.92675
ENSCSAG00000016775	NIM1K	NIM1 serine/threonine protein kinase	1.55786	0.433849	0.955794	1.55786	0.433849	-0.192643	-1.73696	1.64279	0.428435	3.05294	3.6832	1.03236	2.02322	4.36597	3.92184	6.36002	3.85351
ENSCSAG00000005904			1.55483	0.44686	0.958056	1.55483	0.44686	-1.85798	-3.39231	1.71907	0.435111	1.01765	7.36639	1.03236	1.01161	13.0979	15.6874	15.105	6.42252
ENSCSAG00000014130	LGR6		1.55383	0.543339	0.979882	1.55383	0.543339	1.58495	2.55577e-06	1.96864	0.440506	3.05294	0	1.54854	2.52902	1.45532	0	3.18001	1.92675
ENSCSAG00000019177	LRRC10B	leucine rich repeat containing 10B	1.54904	0.135642	0.778239	1.52797	0.0877309	-1.35147	-2.87914	1.54904	0.135642	7.12352	22.0992	7.74269	6.06965	48.0256	26.1456	53.2652	50.0956
ENSCSAG00000018647		D-dopachrome decarboxylase	1.5476	0.000571019	0.0499601	1.5476	0.000571019	1.84472	0.297386	1.54963	0.000216695	77.3411	99.4463	44.3914	58.1675	24.7405	23.5311	53.2652	29.5436
ENSCSAG00000006892	TPO		1.54289	0.554979	0.983184	1.54289	0.554979	1.99998	0.415037	1.93261	0.449919	0	3.6832	2.06472	1.51741	0	1.30728	0.795002	1.92675
ENSCSAG00000013710	DNAH1	dynein axonemal heavy chain 1	1.54289	0.500715	0.97319	1.54289	0.500715	2.58494	0.999997	1.81742	0.403608	6.10588	0	4.64561	1.01161	0	1.30728	0.795002	1.92675
ENSCSAG00000014039	LCN2		1.54144	0.221996	0.870442	1.54144	0.221996	2.85798	1.32193	1.55269	0.106957	14.247	14.7328	7.22651	8.09286	1.45532	2.61456	2.38501	3.85351
ENSCSAG00000009110			1.54071	0.386496	0.94673	1.54071	0.386496	2.11547	0.584963	1.57882	0.316472	2.03529	11.0496	3.61325	1.51741	2.91064	0	1.59	1.92675
ENSCSAG00000013170	GFRA4		1.53869	0.331492	0.929968	1.53532	0.297605	0.362571	-1.16992	1.53869	0.331492	5.08823	3.6832	5.67797	1.51741	2.91064	3.92184	11.925	6.42252
ENSCSAG00000014057	CCDC126	coiled-coil domain containing 126	1.53663	0.00991106	0.279479	1.53663	0.00991106	2.03395	0.498807	1.53748	0.00372918	44.7764	40.5152	31.4869	34.3947	4.36597	16.9947	24.6451	20.552
ENSCSAG00000006259	SGF29		1.53554	0.0461697	0.572402	1.52834	0.0412485	1.03395	-0.493039	1.53554	0.0461697	25.4412	18.416	13.9368	13.1509	13.0979	7.84369	20.6701	16.6985
ENSCSAG00000012835	CILP	cartilage intermediate layer protein	1.53016	0.341241	0.931692	1.53016	0.341241	2.80734	1.26303	1.50793	0.310431	3.05294	3.6832	5.67797	5.56384	0	1.30728	3.18001	1.92675
ENSCSAG00000000602		prothymosin alpha	1.52854	0.54618	0.98038	1.52854	0.54618	-0.652073	-2.16992	1.90353	0.449085	0	7.36639	0.516179	1.01161	4.36597	6.53641	2.38501	7.06477
ENSCSAG00000001397	AK5	adenylate kinase 5	1.52764	0.218207	0.868161	1.4932	0.203612	0.415038	-1.078	1.52764	0.218207	5.08823	14.7328	4.12943	5.05804	5.82129	9.15097	11.925	7.06477
ENSCSAG00000012969	SPEF1	sperm flagellar 1	1.52596	0.214137	0.864626	1.52596	0.214137	1.76553	0.24101	1.537	0.190685	6.10588	11.0496	5.67797	6.57545	1.45532	3.92184	6.36002	5.13801
ENSCSAG00000002549			1.52318	0.270282	0.902843	1.51821	0.232873	0.876671	-0.64432	1.52318	0.270282	136.365	1174.94	170.339	203.333	387.116	326.82	286.201	296.72
ENSCSAG00000018128	SSC4D		1.51562	0.409041	0.949547	1.45531	0.391127	-1.078	-2.52356	1.51562	0.409041	2.03529	7.36639	2.06472	2.02322	10.1873	9.15097	16.695	6.42252
ENSCSAG00000007078	TPK1		1.51192	0.315219	0.921218	1.51192	0.315219	1.48543	2.18491e-06	1.52248	0.275929	7.12352	7.36639	2.5809	4.04643	0	5.22912	3.97501	3.21126
ENSCSAG00000006812	C2orf72		1.51085	0.464979	0.961245	1.46751	0.458804	1.36672e-06	-1.45943	1.51085	0.464979	2.03529	3.6832	2.06472	2.02322	2.91064	2.61456	4.77001	6.42252
ENSCSAG00000016764	OPRL1		1.50986	0.391361	0.949397	1.46819	0.365272	-0.736963	-2.20163	1.50986	0.391361	5.08823	3.6832	4.12943	1.01161	5.82129	9.15097	15.105	8.34927
ENSCSAG00000019057	SKIDA1	SKI/DACH domain containing 1	1.50952	0.543018	0.979737	1.50952	0.543018	-1.67807	-3.16991	1.66086	0.517579	1.01765	3.6832	0.516179	1.01161	5.82129	10.4582	9.54003	7.70702
ENSCSAG00000018909		securin-like	1.50728	0.022388	0.421245	1.49959	0.0150507	0.664816	-0.83494	1.50728	0.022388	24.4235	40.5152	16.5177	20.2322	20.3745	20.9165	32.5951	33.3971
ENSCSAG00000016902			1.50565	0.507431	0.97319	1.50565	0.507431	0.169926	-2.32192	1.68934	0.449429	2.03529	7.36639	0	1.01161	2.91064	5.22912	3.18001	1.92675
ENSCSAG00000013356	HIC2	HIC ZBTB transcriptional repressor 2	1.50032	0.347931	0.934707	1.47487	0.302395	-0.847995	-2.32192	1.50032	0.347931	3.05294	7.36639	5.16179	2.02322	8.73193	9.15097	19.8751	15.414
ENSCSAG00000017521	RAP2A	RAP2A, member of RAS oncogene family	1.49846	0.156399	0.801208	1.47911	0.115902	-0.367731	-1.84799	1.49846	0.156399	5.08823	25.7824	6.19415	8.59867	21.8298	18.3019	30.2101	24.4056
ENSCSAG00000008166			1.49681	7.36638e-05	0.0128901	1.49529	7.32947e-05	1.54374	0.0482556	1.49681	7.36638e-05	110.923	95.7631	88.7828	63.2255	32.0171	39.2184	81.0902	65.5097
ENSCSAG00000009882	EFHB		1.49099	0.129297	0.77113	1.47135	0.128238	0.917538	-0.552539	1.49099	0.129297	8.14117	25.7824	6.71033	7.58706	13.0979	5.22912	11.925	10.276
ENSCSAG00000006704	ZNF441		1.48939	0.0144885	0.338037	1.48939	0.0144885	1.78022	0.289507	1.49402	0.0101569	30.5294	47.8816	22.7119	32.3715	10.1873	13.0728	17.4901	27.6168
ENSCSAG00000007302	TMEM139	transmembrane protein 139	1.48466	0.115388	0.755854	1.48466	0.115388	1.48543	1.40779e-06	1.49325	0.109628	10.1765	18.416	13.4207	8.09286	7.27661	2.61456	11.925	8.99152
ENSCSAG00000000607	FUT4	fucosyltransferase 4	1.47963	0.307084	0.918427	1.45646	0.282454	0.378512	-1.078	1.47963	0.307084	2.03529	11.0496	5.16179	4.04643	7.27661	2.61456	11.13	8.34927
ENSCSAG00000015948	ZFHX2	zinc finger homeobox 2	1.47855	0.140645	0.780108	1.47855	0.140645	2.05889	0.584964	1.47563	0.104575	14.247	11.0496	13.4207	10.6219	1.45532	5.22912	3.18001	12.845
ENSCSAG00000011289		translocase of outer mitochondrial membrane 6	1.47724	8.78798e-05	0.0141637	1.47501	5.01349e-05	1.12131	-0.354532	1.47724	8.78798e-05	96.6764	151.011	69.6842	70.3068	64.0342	49.6767	93.8103	84.7772
ENSCSAG00000015549	GTF3C6		1.47461	0.00352453	0.161358	1.47061	0.00147885	0.68966	-0.781654	1.47461	0.00352453	42.7411	106.813	46.4561	42.9933	49.481	44.4476	89.0403	64.2252
ENSCSAG00000001381			1.47248	0.322574	0.926209	1.47248	0.322574	1.58496	0.0995377	1.61978	0.293286	9.15882	0	6.19415	9.10447	0	2.61456	3.97501	9.63377
ENSCSAG00000005618	BIK		1.47211	0.0364815	0.511624	1.47211	0.0364815	1.51457	0.0430697	1.47877	0.0292963	27.4764	33.1488	21.1634	13.1509	8.73193	11.7655	19.8751	12.845
ENSCSAG00000011920	SPINK6		1.47135	0.293937	0.913979	1.4293	0.291055	0.628032	-0.807352	1.47135	0.293937	2.03529	14.7328	3.61325	3.54063	5.82129	5.22912	3.97501	9.63377
ENSCSAG00000006862	POLR2F	RNA polymerase II, I and III subunit F	1.4636	0.000152729	0.0203345	1.46056	5.54077e-05	0.630614	-0.830075	1.4636	0.000152729	105.835	198.893	68.1357	66.7661	114.97	82.3587	136.74	103.402
ENSCSAG00000017876	GPC2	glypican 2	1.46331	0.0495947	0.58356	1.46331	0.0495947	2.21632	0.750022	1.47562	0.0243803	27.4764	51.5647	23.7442	13.1509	8.73193	7.84369	12.72	8.99152
ENSCSAG00000003745			1.46328	5.23778e-06	0.00152756	1.46182	3.39364e-06	1.46271	2.96438e-07	1.46328	5.23778e-06	167.912	272.557	152.789	122.405	93.1406	66.6713	156.615	118.174
ENSCSAG00000007660	RNF144B	ring finger protein 144B	1.46095	0.334283	0.931138	1.46095	0.334283	1.67807	0.222394	1.5026	0.279288	5.08823	11.0496	2.06472	4.55224	1.45532	3.92184	2.38501	3.85351
ENSCSAG00000017270	VWA3B		1.45694	0.136444	0.778967	1.44122	0.117316	0.584963	-0.857979	1.45694	0.136444	16.2823	11.0496	7.22651	9.10447	8.73193	9.15097	13.515	14.7718
ENSCSAG00000011282	DERL3	derlin 3	1.4568	0.164069	0.811211	1.4568	0.164069	2.32193	0.862497	1.46817	0.105638	12.2118	18.416	10.8398	9.10447	2.91064	2.61456	4.77001	6.42252
ENSCSAG00000007908	BTN3A2	butyrophilin subfamily 3 member A3	1.45165	0.664484	0.994807	1.45165	0.664484	-0.415035	-1.87446	1.92192	0.519417	3.05294	0	1.54854	1.01161	1.45532	2.61456	5.56502	5.13801
ENSCSAG00000013146	BRINP1	BMP/retinoic acid inducible neural specific 1	1.44346	0.521117	0.97319	1.44346	0.521117	1.41503	1.37828e-06	1.5336	0.46252	1.01765	7.36639	2.06472	1.01161	0	2.61456	2.38501	1.2845
ENSCSAG00000012079	UNC93A		1.44291	0.515299	0.97319	1.44291	0.515299	1.80735	0.321929	1.72846	0.418515	7.12352	0	1.54854	2.52902	1.45532	1.30728	3.18001	1.2845
ENSCSAG00000016432	STMN3	stathmin 3	1.44119	0.128041	0.76919	1.42533	0.1239	1.23704	-0.192644	1.44119	0.128041	7.12352	25.7824	8.77505	12.1393	5.82129	7.84369	11.925	12.2028
ENSCSAG00000003194	MEAK7		1.43957	0.048301	0.575638	1.43957	0.048301	2.25634	0.814445	1.43889	0.0324877	17.3	25.7824	28.3899	23.267	5.82129	2.61456	14.31	15.414
ENSCSAG00000001132	HPCAL4		1.4337	0.171985	0.818321	1.4337	0.171985	2	0.556395	1.43151	0.170473	12.2118	3.6832	10.8398	14.1625	1.45532	2.61456	7.95002	8.99152
ENSCSAG00000017710	PHF11	PHD finger protein 11	1.43221	0.44046	0.958056	1.43221	0.44046	1.41503	2.20617e-06	1.45576	0.414292	4.07058	3.6832	3.09708	2.02322	0	2.61456	2.38501	2.56901
ENSCSAG00000000613	CREBZF	CREB/ATF bZIP transcription factor	1.42968	0.0134404	0.328084	1.4281	0.0102275	0.859138	-0.567684	1.42968	0.0134404	29.5117	47.8816	31.4869	24.7844	29.1064	14.3801	50.0851	32.7548
ENSCSAG00000004137	NIP7	nucleolar pre-rRNA processing protein NIP7	1.42759	0.000585632	0.0504249	1.42759	0.000585632	1.64284	0.214125	1.43057	0.000376833	82.4293	95.7631	50.5856	65.2487	30.5618	26.1456	53.2652	46.8844
ENSCSAG00000014692	ISL2	ISL LIM homeobox 2	1.42604	0.189782	0.838987	1.41421	0.185088	1.152	-0.263033	1.42604	0.189782	13.2294	7.36639	7.22651	7.58706	4.36597	5.22912	7.95002	10.276
ENSCSAG00000009100	LURAP1L	leucine rich adaptor protein 1 like	1.42577	0.11348	0.755807	1.42577	0.11348	1.65711	0.234466	1.43649	0.0804358	19.3353	22.0992	10.3236	10.1161	8.73193	3.92184	5.56502	10.9183
ENSCSAG00000001235	DMBX1		1.42532	0.397888	0.949397	1.42532	0.397888	2.22239	0.807354	1.45181	0.317555	3.05294	11.0496	3.09708	3.54063	0	2.61456	0.795002	2.56901
ENSCSAG00000016050	PPP1R3E	protein phosphatase 1 regulatory subunit 3E	1.41987	0.388679	0.94896	1.40547	0.370489	0.169926	-1.22239	1.41987	0.388679	5.08823	3.6832	3.09708	3.03482	7.27661	1.30728	10.335	3.85351
ENSCSAG00000016053	NUS1	NUS1 dehydrodolichyl diphosphate synthase subunit	1.41287	0.00166639	0.102571	1.41287	0.00166639	1.45251	0.0395289	1.41398	0.00158859	60.0411	95.7631	66.5871	44.005	18.9192	37.9112	58.8302	48.8111
ENSCSAG00000012727	SLC2A2	solute carrier family 2 member 2	1.40903	0.425194	0.952732	1.40903	0.425194	3.1699	1.73696	1.42632	0.346655	2.03529	7.36639	4.12943	5.56384	1.45532	0	1.59	1.2845
ENSCSAG00000002804	PLEKHA4		1.40557	0.300254	0.916719	1.43003	0.263595	1.16992	-0.263032	1.40557	0.300254	2.03529	7.36639	7.22651	8.09286	1.45532	2.61456	15.105	3.21126
ENSCSAG00000009307	SH3GL2		1.40136	0.168395	0.813664	1.40136	0.168395	1.48543	0.0780039	1.41896	0.159865	6.10588	22.0992	7.22651	12.1393	2.91064	6.53641	9.54003	7.70702
ENSCSAG00000015442	FBXO41	F-box protein 41	1.40096	0.397885	0.949397	1.40096	0.397885	2.80735	1.41503	1.43163	0.247148	6.10588	14.7328	3.09708	5.05804	2.91064	0	1.59	1.2845
ENSCSAG00000007488	DNAH3		1.39925	0.289445	0.912413	1.35166	0.262386	-0.502499	-1.85798	1.39925	0.289445	2.03529	22.0992	3.09708	4.55224	17.4639	16.9947	12.72	16.0563
ENSCSAG00000004139			1.39728	0.296815	0.915287	1.35964	0.278845	0.192646	-1.16992	1.39728	0.296815	9.15882	7.36639	1.54854	6.06965	7.27661	6.53641	9.54003	8.34927
ENSCSAG00000004833			1.39713	0.638929	0.993371	1.39713	0.638929	1.27584e-06	-1.41503	1.80522	0.511822	0	3.6832	0.516179	1.51741	1.45532	2.61456	3.18001	5.13801
ENSCSAG00000008641	TMEM134		1.39663	0.0533302	0.59914	1.39067	0.027975	-0.377235	-1.76899	1.39663	0.0533302	13.2294	73.6639	27.3575	22.2554	74.2214	39.2184	99.3753	68.0787
ENSCSAG00000015887	TAF1A	TATA-box binding protein associated factor, RNA polymerase I subunit A	1.39644	0.0380114	0.519066	1.39644	0.0380114	1.72698	0.332576	1.40573	0.0179293	40.7058	55.2479	19.6148	14.1625	8.73193	19.6092	12.72	14.1295
ENSCSAG00000003596	NUDT7	nudix hydrolase 7	1.39522	0.397978	0.949397	1.39522	0.397978	1.87446	0.485428	1.41896	0.349344	4.07058	7.36639	3.09708	3.54063	0	2.61456	2.38501	3.21126
ENSCSAG00000013870	SDHAF4	succinate dehydrogenase complex assembly factor 4	1.39478	0.0547418	0.603016	1.39478	0.0547418	2.82312	1.42321	1.40405	0.0185961	26.4588	66.2975	25.809	33.3831	8.73193	3.92184	9.54003	12.2028
ENSCSAG00000014742	MBLAC2	metallo-beta-lactamase domain containing 2	1.39367	0.0320624	0.4818	1.39367	0.0320624	2.11548	0.719893	1.3966	0.0175184	35.6176	29.4656	29.4222	27.3134	7.27661	7.84369	20.6701	12.845
ENSCSAG00000009213	LRMDA		1.39163	0.204695	0.850526	1.39163	0.204695	2.08746	0.691879	1.38837	0.17923	10.1765	7.36639	9.80741	11.1277	1.45532	2.61456	4.77001	7.70702
ENSCSAG00000002868	SYNGR4	synaptogyrin 4	1.39019	0.308879	0.920774	1.39019	0.308879	2.90688	1.5025	1.39862	0.228442	4.07058	11.0496	10.3236	6.57545	1.45532	1.30728	2.38501	3.85351
ENSCSAG00000001121	FHL3	four and a half LIM domains 3	1.39001	0.0134326	0.328084	1.39001	0.0134326	2.59826	1.2076	1.39143	0.00301272	49.8647	58.9311	41.2943	55.6384	5.82129	11.7655	15.9	25.6901
ENSCSAG00000014481	CAMKV	CaM kinase like vesicle associated	1.38882	0.352281	0.936232	1.38882	0.352281	1.58496	0.192647	1.4168	0.320636	5.08823	7.36639	4.12943	4.04643	2.91064	1.30728	3.18001	3.85351
ENSCSAG00000009961			1.38751	0.271625	0.904603	1.39623	0.243362	1.1375	-0.263032	1.38751	0.271625	7.12352	3.6832	7.22651	7.58706	1.45532	3.92184	5.56502	11.5605
ENSCSAG00000010801	ALOXE3		1.38131	0.203049	0.849329	1.38131	0.203049	1.37851	1.52275e-06	1.40067	0.175734	11.1941	14.7328	5.16179	7.58706	7.27661	2.61456	7.15502	6.42252
ENSCSAG00000013221	SUV39H1	suppressor of variegation 3-9 homolog 1	1.37945	0.00794444	0.256758	1.37945	0.00794444	1.35845	-0.0220257	1.38308	0.00744188	47.8294	51.5647	38.1973	26.8076	18.9192	19.6092	32.5951	32.7548
ENSCSAG00000007738	MOSPD1		1.37527	0.287516	0.912413	1.37527	0.287516	1.37851	1.88812e-06	1.38312	0.285446	9.15882	3.6832	4.64561	7.08126	1.45532	3.92184	4.77001	7.06477
ENSCSAG00000017447	IRAK1BP1	interleukin 1 receptor associated kinase 1 binding protein 1	1.37376	0.0662305	0.649794	1.36603	0.0638941	1.09516	-0.271301	1.37376	0.0662305	18.3176	29.4656	13.4207	16.1857	11.6426	10.4582	15.9	18.6253
ENSCSAG00000008370	RMI2	RecQ mediated genome instability 2	1.37352	0.0391776	0.527927	1.37352	0.0391776	1.21681	-0.160464	1.3869	0.0375412	23.4059	62.6143	16.5177	17.1973	17.4639	19.6092	19.0801	18.6253
ENSCSAG00000007744	ITPKA		1.37322	0.227298	0.878142	1.37322	0.227298	1.07039	-0.299558	1.38652	0.219846	6.10588	14.7328	7.74269	4.55224	8.73193	1.30728	9.54003	5.78026
ENSCSAG00000018985	C6orf120		1.37145	0.0242787	0.433366	1.36518	0.017697	0.893085	-0.47393	1.37145	0.0242787	25.4412	66.2975	25.2928	29.3366	27.6511	20.9165	45.3151	29.5436
ENSCSAG00000002412	ATF5	activating transcription factor 5	1.37054	0.0604214	0.628553	1.36201	0.0526898	0.842459	-0.519373	1.37054	0.0604214	19.3353	33.1488	17.0339	13.1509	16.0085	13.0728	24.6451	17.983
ENSCSAG00000013817	TTN		1.36356	0.515891	0.97319	1.36356	0.515891	1.58495	0.192647	1.74057	0.426093	3.05294	0	4.64561	2.52902	0	1.30728	4.77001	1.92675
ENSCSAG00000000729	C1orf174	chromosome unknown C1orf174 homolog	1.35917	0.0134617	0.328084	1.35917	0.0134617	1.92338	0.563901	1.36244	0.00654231	46.8117	62.6143	36.6487	31.3599	14.5532	14.3801	19.8751	25.6901
ENSCSAG00000005601	BST2	bone marrow stromal cell antigen 2	1.35532	0.00154395	0.0976597	1.35532	0.00154395	2.84938	1.49228	1.35735	0.000204094	90.5705	117.862	84.6534	125.945	16.0085	13.0728	42.1351	32.7548
ENSCSAG00000018331		X-linked inhibitor of apoptosis	1.35494	0.0311653	0.475397	1.34681	0.023301	0.948775	-0.400537	1.35494	0.0311653	24.4235	58.9311	20.131	30.3482	23.2852	19.6092	32.5951	32.7548
ENSCSAG00000012839	PPP1R3F	protein phosphatase 1 regulatory subunit 3F	1.35312	0.344652	0.933433	1.3254	0.328642	-0.280106	-1.58496	1.35312	0.344652	7.12352	7.36639	2.5809	3.03482	11.6426	5.22912	15.105	3.21126
ENSCSAG00000010387	C1QTNF2	C1q and TNF related 2	1.35039	0.457066	0.960103	1.28637	0.455984	-0.530512	-1.80735	1.35039	0.457066	5.08823	3.6832	3.09708	0.505804	4.36597	9.15097	6.36002	8.34927
ENSCSAG00000000156			1.34982	0.000327243	0.0354726	1.34645	8.57213e-05	1.02867	-0.319372	1.34982	0.000327243	160.788	397.785	119.754	106.219	146.988	126.806	152.64	129.093
ENSCSAG00000016321	LCT	lactase	1.34568	0.685869	0.999102	1.34568	0.685869	1.74678e-06	-1.32192	1.80448	0.545662	0	3.6832	0.516179	0.505804	0	3.92184	3.97501	1.2845
ENSCSAG00000005327			1.34521	0.00101137	0.0746285	1.34209	0.000545244	1.68675	0.342281	1.34521	0.00101137	97.694	268.873	108.398	123.922	62.5789	50.984	106.53	76.4279
ENSCSAG00000010296	CDKN1A	cyclin dependent kinase inhibitor 1A	1.34501	2.85592e-07	0.000120628	1.34501	2.85592e-07	2.23206	0.886044	1.34664	7.26381e-08	476.258	721.906	297.835	285.779	154.264	100.661	164.565	150.929
ENSCSAG00000007922			1.33894	0.563484	0.985891	2.0449	0.367222	0.584964	-0.584952	1.33894	0.563484	2.03529	3.6832	0.516179	0.505804	0	3.92184	0	2.56901
ENSCSAG00000000626		39S ribosomal protein L35, mitochondrial	1.33596	0.013095	0.324945	1.33596	0.013095	1.48875	0.152004	1.33776	0.011976	34.6	51.5647	38.1973	31.8657	17.4639	14.3801	35.7751	26.9746
ENSCSAG00000002821			1.33359	0.270081	0.902654	1.32632	0.216066	-0.321927	-1.65207	1.33359	0.270081	12.2118	3.6832	8.77505	5.05804	7.27661	13.0728	26.2351	17.983
ENSCSAG00000018296			1.33254	0.353991	0.937196	1.26242	0.349115	-0.506958	-1.76553	1.33254	0.353991	4.07058	14.7328	3.61325	1.01161	14.5532	11.7655	8.74503	7.70702
ENSCSAG00000013449	CHGB	chromogranin B	1.32935	0.374086	0.941502	1.32935	0.374086	2.32192	1	1.34256	0.292389	8.14117	7.36639	4.12943	5.56384	2.91064	0	3.97501	0.642252
ENSCSAG00000018914			1.32713	0.0479264	0.574413	1.31741	0.0283784	-0.0186152	-1.33703	1.32713	0.0479264	22.3882	55.2479	14.9692	22.7612	45.115	32.682	42.1351	53.9491
ENSCSAG00000014287	HOXA6		1.32624	0.414312	0.949547	1.26344	0.391317	-0.999998	-2.26303	1.32624	0.414312	4.07058	7.36639	2.5809	1.51741	13.0979	9.15097	11.925	12.2028
ENSCSAG00000004605	WTIP		1.32518	0.0363785	0.511624	1.31872	0.0128221	-1.84388	-3.16189	1.32518	0.0363785	26.4588	51.5647	22.1957	17.7031	139.711	139.879	197.161	161.205
ENSCSAG00000009819	NRTN	neurturin	1.32357	0.476881	0.963718	1.25399	0.45268	-2.55458	-3.80735	1.32357	0.476881	4.07058	3.6832	2.06472	1.51741	29.1064	18.3019	35.7751	19.9098
ENSCSAG00000013008		SEM1 26S proteasome complex subunit	1.3217	9.37555e-07	0.000337768	1.3217	9.37555e-07	2.53456	1.21172	1.32356	6.1976e-07	491.523	858.185	364.939	352.545	117.881	115.041	179.671	130.377
ENSCSAG00000010786	VWF	von Willebrand factor	1.31846	0.427763	0.953258	1.3297	0.379082	-0.192644	-1.52356	1.31846	0.427763	3.05294	3.6832	5.16179	3.03482	4.36597	3.92184	11.925	10.9183
ENSCSAG00000003055	ODAD4		1.31774	0.207551	0.85511	1.31774	0.207551	1.71049	0.387024	1.34291	0.168342	7.12352	29.4656	10.3236	6.57545	4.36597	6.53641	8.74503	4.49576
ENSCSAG00000006938	ADI1	acireductone dioxygenase 1	1.31726	0.0209303	0.406945	1.31726	0.0209303	1.94342	0.624492	1.32046	0.0109359	36.6353	62.6143	39.2296	34.9005	18.9192	6.53641	26.2351	22.4788
ENSCSAG00000001912	VSTM1		1.31638	0.480001	0.963928	1.61323	0.393441	1.58496	0.263036	1.31638	0.480001	2.03529	3.6832	2.5809	3.03482	1.45532	1.30728	0	5.13801
ENSCSAG00000015794	KPNA5	karyopherin subunit alpha 5	1.31341	0.118561	0.760699	1.31341	0.118561	0.665582	-0.643855	1.33113	0.114852	17.3	29.4656	9.29123	6.57545	11.6426	16.9947	16.695	7.70702
ENSCSAG00000017307	ANKRD23		1.31043	0.527649	0.973427	1.4488	0.484321	0.192647	-0.999995	1.31043	0.527649	1.01765	7.36639	1.54854	1.01161	4.36597	2.61456	5.56502	0
ENSCSAG00000011750	NAPEPLD	N-acyl phosphatidylethanolamine phospholipase D	1.31012	0.0684032	0.657712	1.30108	0.0636156	1.02647	-0.277533	1.31012	0.0684032	18.3176	36.832	14.453	19.2206	13.0979	14.3801	23.0551	16.6985
ENSCSAG00000015930	ACVR1C	activin A receptor type 1C	1.30774	0.546211	0.98038	1.30774	0.546211	1.28537e-06	-1.32192	1.57873	0.469235	5.08823	0	4.12943	2.02322	0	5.22912	7.15502	8.34927
ENSCSAG00000017675	CABLES1		1.30673	0.0159288	0.356694	1.3004	0.0107713	1.33442	0.0300577	1.30673	0.0159288	37.6529	136.278	40.7782	56.1442	37.8384	31.3747	53.2652	41.7463
ENSCSAG00000002489	CFAP45	cilia and flagella associated protein 45	1.30578	0.600026	0.990075	1.30578	0.600026	1.32192	1.37136e-06	1.39816	0.555799	1.01765	3.6832	2.06472	1.01161	1.45532	1.30728	0.795002	1.92675
ENSCSAG00000012219	SEMA3E		1.30527	0.277775	0.907784	1.63116	0.277161	2.99999	1.70044	1.30527	0.277775	5.08823	11.0496	8.25887	5.05804	1.45532	1.30728	0	4.49576
ENSCSAG00000016850	LONRF1	LON peptidase N-terminal domain and ring finger 1	1.30265	0.125677	0.768424	1.28992	0.0969411	0.232661	-1.05889	1.30265	0.125677	10.1765	36.832	13.9368	9.61028	21.8298	18.3019	27.8251	22.4788
ENSCSAG00000007495	TMEM170B	transmembrane protein 170B	1.30201	0.510016	0.97319	1.23529	0.500681	-1.51457	-2.75488	1.30201	0.510016	3.05294	3.6832	1.03236	3.03482	10.1873	10.4582	13.515	13.4873
ENSCSAG00000003812	AAMDC	adipogenesis associated Mth938 domain containing	1.30127	0.0467274	0.574413	1.30127	0.0467274	2.28011	0.976542	1.30482	0.0235225	34.6	33.1488	36.1325	24.7844	5.82129	7.84369	13.515	16.6985
ENSCSAG00000019523	LRRC61	leucine rich repeat containing 61	1.30088	0.304609	0.916971	1.30182	0.264678	0.241009	-1.05889	1.30088	0.304609	6.10588	7.36639	6.71033	5.05804	5.82129	5.22912	16.695	8.34927
ENSCSAG00000012168	ZNF483	zinc finger protein 483	1.30033	0.0872499	0.707126	1.30033	0.0872499	1.34104	0.0406431	1.30065	0.0844688	23.4059	14.7328	21.1634	15.1741	11.6426	2.61456	19.8751	14.7718
ENSCSAG00000016744			1.29858	0.352029	0.936171	1.29858	0.352029	2.41503	1.11548	1.30907	0.274901	5.08823	11.0496	5.67797	7.08126	0	2.61456	2.38501	3.85351
ENSCSAG00000016045	TADA2B	transcriptional adaptor 2B	1.29837	0.0126934	0.323919	1.29661	0.00750776	0.4885	-0.807354	1.29837	0.0126934	41.7235	51.5647	30.9708	32.8773	37.8384	28.7602	62.8052	49.4534
ENSCSAG00000013829	SLC22A4	solute carrier family 22 member 4	1.29692	0.164486	0.811211	1.29692	0.164486	1.47805	0.180573	1.31433	0.126061	21.3706	18.416	9.29123	7.58706	8.73193	5.22912	7.15502	8.34927
ENSCSAG00000014086	TMEM47	transmembrane protein 47	1.29656	0.528453	0.973427	1.29656	0.528453	2.32191	0.999997	1.29884	0.516246	1.01765	3.6832	2.5809	3.03482	1.45532	0	0.795002	1.92675
ENSCSAG00000008287	DPP3		1.29418	0.00353696	0.161358	1.29418	0.00353696	1.33704	0.0430692	1.29591	0.00305718	59.0235	84.7135	52.1341	50.0746	32.0171	24.8383	61.2152	37.8928
ENSCSAG00000018355	STEEP1		1.29055	0.0776823	0.685047	1.29309	0.0730309	1.54057	0.243927	1.29055	0.0776823	14.247	18.416	24.2604	21.2438	7.27661	3.92184	16.695	20.552
ENSCSAG00000012038	NABP1	nucleic acid binding protein 1	1.2897	0.366771	0.939727	1.2897	0.366771	1.1375	-0.152001	1.29855	0.363024	7.12352	3.6832	4.64561	4.04643	1.45532	3.92184	6.36002	4.49576
ENSCSAG00000019170	CCDC85B	coiled-coil domain containing 85B	1.28907	0.0514333	0.591394	1.28437	0.0310454	-0.302562	-1.58496	1.28907	0.0514333	30.5294	29.4656	17.0339	16.6915	48.0256	26.1456	60.4202	41.7463
ENSCSAG00000011567	WDR72	WD repeat domain 72	1.28744	0.80632	0.999894	1.28744	0.80632	-0.999993	-3.3219	1.81562	0.608325	0	3.6832	0	0.505804	1.45532	6.53641	4.77001	5.13801
ENSCSAG00000017904	ZNF397		1.28636	0.268567	0.902042	1.28247	0.262172	1.19264	-0.0931077	1.28636	0.268567	5.08823	11.0496	8.77505	5.56384	2.91064	3.92184	9.54003	6.42252
ENSCSAG00000013753	PARP6	poly(ADP-ribose) polymerase family member 6	1.28518	0.370305	0.940393	1.23935	0.323436	-2.59903	-3.8365	1.28518	0.370305	2.03529	14.7328	4.12943	3.03482	50.9363	52.2912	43.7251	55.8759
ENSCSAG00000015095	TRIM9		1.28379	0.512755	0.97319	1.25318	0.512427	0.584962	-0.678068	1.28379	0.512755	2.03529	3.6832	2.5809	1.51741	1.45532	2.61456	3.18001	5.13801
ENSCSAG00000005782	KRT81	keratin, type II cuticular Hb6	1.28207	0.00771884	0.25337	1.28207	0.00771884	2.42269	1.1375	1.28877	0.00183938	86.4999	165.744	53.6826	56.1442	24.7405	22.2238	29.4151	21.1943
ENSCSAG00000013980	FAM102A	family with sequence similarity 102 member A	1.27848	0.0511457	0.58995	1.27108	0.0373236	0.24936	-1.02106	1.27848	0.0511457	33.5823	29.4656	18.0663	16.1857	21.8298	31.3747	42.1351	26.9746
ENSCSAG00000001965	KCNN3	potassium calcium-activated channel subfamily N member 3	1.27742	0.534473	0.975217	1.27742	0.534473	1.99999	0.678072	1.60388	0.442342	4.07058	0	3.09708	4.55224	0	1.30728	1.59	2.56901
ENSCSAG00000002816	PTS	6-pyruvoyltetrahydropterin synthase	1.27661	0.122877	0.767137	1.26437	0.113831	0.724366	-0.540567	1.27661	0.122877	16.2823	22.0992	11.3559	10.6219	8.73193	14.3801	18.2851	14.1295
ENSCSAG00000009051	OSBP2		1.27627	0.349179	0.934707	1.27627	0.349179	1.28011	1.6974e-06	1.31408	0.310999	6.10588	11.0496	5.16179	3.03482	2.91064	3.92184	4.77001	3.21126
ENSCSAG00000010093	CCNYL1	cyclin Y like 1	1.2756	0.301402	0.916719	1.2323	0.264957	-0.898119	-2.12928	1.2756	0.301402	7.12352	14.7328	2.06472	6.06965	17.4639	23.5311	17.4901	17.983
ENSCSAG00000017949			1.27216	0.35994	0.937923	1.26465	0.342182	0.584963	-0.678069	1.27216	0.35994	8.14117	3.6832	3.09708	6.57545	1.45532	6.53641	9.54003	6.42252
ENSCSAG00000005370	LSM4	LSM4 homolog, U6 small nuclear RNA and mRNA degradation associated	1.27128	0.0246805	0.434864	1.2659	0.00969648	2.7367	1.46647	1.27128	0.0246805	774.429	1038.66	523.406	248.35	157.175	115.041	139.125	140.011
ENSCSAG00000008079			1.26938	0.16314	0.8098	1.25489	0.160826	0.839536	-0.415036	1.26938	0.16314	12.2118	22.0992	7.22651	10.6219	7.27661	11.7655	12.72	10.9183
ENSCSAG00000005929	ZNF654	zinc finger protein 654	1.2684	0.0294966	0.462617	1.26152	0.0219314	0.658963	-0.604071	1.2684	0.0294966	30.5294	58.9311	22.7119	27.3134	30.5618	26.1456	31.8001	44.3154
ENSCSAG00000004489		BRCA2 and CDKN1A interacting protein	1.26804	0.000117468	0.0171293	1.26585	5.78281e-05	0.9386	-0.327927	1.26804	0.000117468	142.47	202.576	100.655	90.5389	85.864	94.1242	124.815	116.248
ENSCSAG00000005962	ANKMY1		1.26781	0.402246	0.949397	1.68794	0.336477	2.45942	1.22239	1.26781	0.402246	4.07058	7.36639	3.09708	4.04643	1.45532	1.30728	0	3.21126
ENSCSAG00000002062	RILPL2	Rab interacting lysosomal protein like 2	1.26734	0.00899416	0.270327	1.2653	0.00424207	0.136322	-1.1281	1.26734	0.00899416	51.9	69.9807	37.6811	32.3715	59.6682	50.984	85.8603	66.7942
ENSCSAG00000007315	PHYHIPL	phytanoyl-CoA 2-hydroxylase interacting protein like	1.26507	0.254679	0.894158	1.26507	0.254679	2.72246	1.45943	1.27129	0.13748	15.2647	18.416	11.3559	10.6219	1.45532	3.92184	4.77001	2.56901
ENSCSAG00000009206			1.26335	0.187467	0.836801	1.27671	0.180047	1.67807	0.398551	1.26335	0.187467	9.15882	7.36639	13.9368	15.1741	1.45532	3.92184	7.15502	15.414
ENSCSAG00000016780		SS18 like 2	1.26285	0.353075	0.936862	1.26285	0.353075	1.926	0.652077	1.29773	0.293351	4.07058	14.7328	3.61325	6.57545	4.36597	1.30728	3.97501	2.56901
ENSCSAG00000000571	HASPIN	histone H3 associated protein kinase	1.2627	0.00959428	0.278008	1.25852	0.00658526	0.807355	-0.452512	1.2627	0.00959428	47.8294	84.7135	38.7134	37.4295	34.9277	40.5257	54.8552	48.8111
ENSCSAG00000017554	C7orf50	chromosome unknown C7orf50 homolog	1.26183	0.000569742	0.0499601	1.26027	0.000369012	1.24672	-0.0140748	1.26183	0.000569742	103.8	195.209	98.0741	105.713	61.1235	65.3641	124.02	82.2082
ENSCSAG00000015171	DMAC2L		1.25779	0.0991674	0.733072	1.25779	0.0991674	1.74543	0.485428	1.26594	0.0728586	20.3529	36.832	12.9045	21.7496	11.6426	5.22912	14.31	10.9183
ENSCSAG00000003799			1.25422	0.462778	0.961111	1.18809	0.439286	-3.29768	-4.48542	1.25422	0.462778	1.01765	11.0496	2.06472	2.52902	58.2129	60.1349	47.7001	64.2252
ENSCSAG00000008743	ALDH3B2		1.2517	0.500448	0.972999	1.2517	0.500448	3.1699	1.87446	1.43911	0.389109	9.15882	0	3.61325	6.57545	0	1.30728	2.38501	1.2845
ENSCSAG00000018290			1.25158	0.213473	0.86355	1.23733	0.171511	-0.0506252	-1.2895	1.25158	0.213473	6.10588	22.0992	8.77505	8.59867	13.0979	15.6874	23.0551	21.1943
[truncated: 11,845 more rows]

## Sheet: GO_TS_up
Category	Term	Fold Enrichment	PValue	Count	%	Genes	List Total	Pop Hits	Pop Total	Bonferroni	Benjamini	FDR
[truncated: 14 more rows]

## Sheet: GO_TS_down
No genes had significantly lower transcription in WT than mock with log2FC threshold of 1

[truncated: 2 more sheets: GO_TE_up, GO_TE_down]
