# Supplementary material for: Ribosome profiling of porcine reproductive and respiratory syndrome virus reveals novel features of viral gene expression
Source: bioRxiv preprint, doi:10.1101/2021.11.17.468997, version 1 (2021-11-19)
Supplement: Supplementary Table 10 [file 468997_file13.xlsx]

## Sheet: TS_up
Gene_ID	external_gene_name	wikigene_description	baseMean	log2FoldChange	lfcSE	stat	pvalue	padj	p_final	p_adj_final	noCHX_RNA_12hpi_KO2_1	noCHX_RNA_12hpi_KO2_2	noCHX_RNA_12hpi_mock_1	noCHX_RNA_12hpi_mock_2
ENSCSAG00000009591	DUSP1	dual specificity phosphatase 1	816.756	2.90851	0.132544	21.5623	4.06056e-103	2.56912e-99	4.06056e-103	2.56912e-99	1486.64	1529.79	122.705	127.885
ENSCSAG00000011516	GADD45B	growth arrest and DNA damage inducible beta	1654.01	2.33997	0.124924	18.678	7.48159e-78	2.3668e-74	7.48159e-78	2.3668e-74	3099.69	2676.54	426.061	413.747
ENSCSAG00000000149	JUN	Jun proto-oncogene, AP-1 transcription factor subunit	294.402	1.94398	0.150939	12.7316	3.94504e-37	6.24007e-34	3.94504e-37	6.24007e-34	532.894	483.769	87.7685	73.175
ENSCSAG00000014681	ARRDC3	arrestin domain containing 3	484.273	1.91965	0.147561	12.9368	2.78929e-38	5.8826e-35	2.78929e-38	5.8826e-35	756.968	899.6	118.445	162.079
ENSCSAG00000011934	KLF10	Kruppel like factor 10	485.121	1.68132	0.144767	11.5711	5.77236e-31	6.08696e-28	5.77236e-31	6.08696e-28	738.295	855.089	150.825	196.273
ENSCSAG00000008869	HES1	hes family bHLH transcription factor 1	601.888	1.52461	0.132043	11.5193	1.05493e-30	9.53503e-28	1.05493e-30	9.53503e-28	933.642	954.654	260.749	258.506
ENSCSAG00000010905	BHLHE40	basic helix-loop-helix family member e40	1329.48	1.50838	0.128726	11.7094	1.14114e-31	1.444e-28	1.14114e-31	1.444e-28	1880.21	2261.89	562.4	613.439
ENSCSAG00000012217	FLNB	filamin B	823.006	1.26297	0.129423	9.7513	1.82118e-22	1.44033e-19	1.82118e-22	1.44033e-19	1297.04	1146.76	413.279	434.947
ENSCSAG00000014076	ELF3	E74 like ETS transcription factor 3	646.971	1.24996	0.13295	9.39373	5.79144e-21	4.07138e-18	5.79144e-21	4.07138e-18	999.715	923.027	351.926	313.216
ENSCSAG00000001429	CCN1	cellular communication network factor 1	1375.64	1.12308	0.130168	8.62694	6.30127e-18	3.98681e-15	6.30127e-18	3.98681e-15	1762.43	2196.29	801.846	742.008
ENSCSAG00000006885	LDLR		588.782	1.12188	0.135392	8.28182	1.21307e-16	6.97738e-14	1.21307e-16	6.97738e-14	869.005	835.176	352.778	298.171
ENSCSAG00000007490	NEDD9	neural precursor cell expressed, developmentally down-regulated 9	136.727	1.0971	0.168303	6.50706	7.66381e-11	1.86496e-08	7.66381e-11	1.86496e-08	182.419	245.984	46.0145	72.4911
ENSCSAG00000006272	NFKBIZ	NFKB inhibitor zeta	143.439	1.09207	0.166389	6.55205	5.67528e-11	1.49615e-08	5.67528e-11	1.49615e-08	178.11	264.726	67.3176	63.6007
ENSCSAG00000001494	PTBP2	polypyrimidine tract binding protein 2	418.03	1.07759	0.146898	7.32957	2.3089e-13	9.73893e-11	2.3089e-13	9.73893e-11	521.403	695.784	218.995	235.938
ENSCSAG00000012077	CCNL1	cyclin L1	181.738	1.05539	0.158961	6.62464	3.481e-11	1.01354e-08	3.481e-11	1.01354e-08	244.183	296.353	88.6206	97.7946
ENSCSAG00000008600	CLK4	CDC like kinase 4	91.4601	1.0134	0.16955	5.95791	2.55479e-09	5.0513e-07	2.55479e-09	5.0513e-07	136.455	146.419	39.1976	43.7682

## Sheet: TS_down
No genes had significantly lower transcription in KO2 than mock with log2FC threshold of 1

## Sheet: TS_full
gene_ID	external_gene_name	wikigene_description	baseMean	log2FoldChange	lfcSE	stat	pvalue	padj	p_final	p_adj_final	noCHX_RNA_12hpi_KO2_1	noCHX_RNA_12hpi_KO2_2	noCHX_RNA_12hpi_mock_1	noCHX_RNA_12hpi_mock_2
ENSCSAG00000009591	DUSP1	dual specificity phosphatase 1	816.756	2.90851	0.132544	21.5623	4.06056e-103	2.56912e-99	4.06056e-103	2.56912e-99	1486.64	1529.79	122.705	127.885
ENSCSAG00000011516	GADD45B	growth arrest and DNA damage inducible beta	1654.01	2.33997	0.124924	18.678	7.48159e-78	2.3668e-74	7.48159e-78	2.3668e-74	3099.69	2676.54	426.061	413.747
ENSCSAG00000000149	JUN	Jun proto-oncogene, AP-1 transcription factor subunit	294.402	1.94398	0.150939	12.7316	3.94504e-37	6.24007e-34	3.94504e-37	6.24007e-34	532.894	483.769	87.7685	73.175
ENSCSAG00000014681	ARRDC3	arrestin domain containing 3	484.273	1.91965	0.147561	12.9368	2.78929e-38	5.8826e-35	2.78929e-38	5.8826e-35	756.968	899.6	118.445	162.079
ENSCSAG00000011934	KLF10	Kruppel like factor 10	485.121	1.68132	0.144767	11.5711	5.77236e-31	6.08696e-28	5.77236e-31	6.08696e-28	738.295	855.089	150.825	196.273
ENSCSAG00000008869	HES1	hes family bHLH transcription factor 1	601.888	1.52461	0.132043	11.5193	1.05493e-30	9.53503e-28	1.05493e-30	9.53503e-28	933.642	954.654	260.749	258.506
ENSCSAG00000010905	BHLHE40	basic helix-loop-helix family member e40	1329.48	1.50838	0.128726	11.7094	1.14114e-31	1.444e-28	1.14114e-31	1.444e-28	1880.21	2261.89	562.4	613.439
ENSCSAG00000012217	FLNB	filamin B	823.006	1.26297	0.129423	9.7513	1.82118e-22	1.44033e-19	1.82118e-22	1.44033e-19	1297.04	1146.76	413.279	434.947
ENSCSAG00000014076	ELF3	E74 like ETS transcription factor 3	646.971	1.24996	0.13295	9.39373	5.79144e-21	4.07138e-18	5.79144e-21	4.07138e-18	999.715	923.027	351.926	313.216
ENSCSAG00000001429	CCN1	cellular communication network factor 1	1375.64	1.12308	0.130168	8.62694	6.30127e-18	3.98681e-15	6.30127e-18	3.98681e-15	1762.43	2196.29	801.846	742.008
ENSCSAG00000006885	LDLR		588.782	1.12188	0.135392	8.28182	1.21307e-16	6.97738e-14	1.21307e-16	6.97738e-14	869.005	835.176	352.778	298.171
ENSCSAG00000007490	NEDD9	neural precursor cell expressed, developmentally down-regulated 9	136.727	1.0971	0.168303	6.50706	7.66381e-11	1.86496e-08	7.66381e-11	1.86496e-08	182.419	245.984	46.0145	72.4911
ENSCSAG00000006272	NFKBIZ	NFKB inhibitor zeta	143.439	1.09207	0.166389	6.55205	5.67528e-11	1.49615e-08	5.67528e-11	1.49615e-08	178.11	264.726	67.3176	63.6007
ENSCSAG00000001494	PTBP2	polypyrimidine tract binding protein 2	418.03	1.07759	0.146898	7.32957	2.3089e-13	9.73893e-11	2.3089e-13	9.73893e-11	521.403	695.784	218.995	235.938
ENSCSAG00000012077	CCNL1	cyclin L1	181.738	1.05539	0.158961	6.62464	3.481e-11	1.01354e-08	3.481e-11	1.01354e-08	244.183	296.353	88.6206	97.7946
ENSCSAG00000008600	CLK4	CDC like kinase 4	91.4601	1.0134	0.16955	5.95791	2.55479e-09	5.0513e-07	2.55479e-09	5.0513e-07	136.455	146.419	39.1976	43.7682
ENSCSAG00000012060	TIPARP	TCDD inducible poly(ADP-ribose) polymerase	373.364	0.983226	0.150589	6.52466	6.81553e-11	1.72488e-08	6.81553e-11	1.72488e-08	485.494	583.334	179.798	244.829
ENSCSAG00000019089		histone H3.1	528.337	0.981872	0.134292	7.30831	2.70519e-13	1.06973e-10	2.70519e-13	1.06973e-10	768.459	707.498	315.285	322.107
ENSCSAG00000008854	PLEC		2019.76	0.979538	0.128098	7.6478	2.04449e-14	9.95035e-12	2.04449e-14	9.95035e-12	2950.31	2649.6	1371.91	1107.2
ENSCSAG00000009985	FLNC	filamin C	590.675	0.978479	0.131588	7.43291	1.06231e-13	4.80086e-11	1.06231e-13	4.80086e-11	804.368	838.69	364.708	354.933
ENSCSAG00000010810	AMOTL2	angiomotin like 2	1569.67	0.953196	0.121963	7.81534	5.48135e-15	2.89004e-12	5.48135e-15	2.89004e-12	2189.03	2109.61	1050.67	929.391
ENSCSAG00000019097	H2BC3		694.991	0.917065	0.131706	6.96228	3.34808e-12	1.24608e-09	3.34808e-12	1.24608e-09	1014.08	889.058	450.772	426.056
ENSCSAG00000017469	COL4A2		2214.15	0.915555	0.137069	6.68186	2.35931e-11	7.46367e-09	2.35931e-11	7.46367e-09	3319.45	2776.11	1590.91	1170.12
ENSCSAG00000018838	JUNB	JunB proto-oncogene, AP-1 transcription factor subunit	401.323	0.905428	0.140046	6.46283	1.02764e-10	2.40811e-08	1.02764e-10	2.40811e-08	581.73	524.767	243.707	255.087
ENSCSAG00000007963	MYH9	myosin heavy chain 9	2970.8	0.862123	0.12487	6.90505	5.01847e-12	1.76399e-09	5.01847e-12	1.76399e-09	4311.99	3651.11	2099.63	1820.49
ENSCSAG00000009162	FN1	fibronectin 1	454.29	0.861814	0.141356	6.09601	1.08748e-09	2.2935e-07	1.08748e-09	2.2935e-07	577.421	660.644	314.433	264.661
ENSCSAG00000011873	RIMS2		117.799	0.850776	0.170294	4.99621	5.8469e-07	7.25359e-05	5.8469e-07	7.25359e-05	133.583	215.529	50.2751	71.8073
ENSCSAG00000015604	COL5A1	collagen type V alpha 1 chain	2287.36	0.846624	0.127854	6.62281	3.52423e-11	1.01354e-08	3.52423e-11	1.01354e-08	3227.53	2893.25	1678.68	1349.98
ENSCSAG00000005364	GDF15	growth differentiation factor 15	309.329	0.838493	0.152675	5.49438	3.92089e-08	6.70472e-06	3.92089e-08	6.70472e-06	471.13	381.862	218.143	166.183
ENSCSAG00000015874	NOTCH1	notch receptor 1	863.406	0.834891	0.126961	6.57591	4.83566e-11	1.33023e-08	4.83566e-11	1.33023e-08	1170.64	1130.36	604.154	548.471
ENSCSAG00000006772	FLNA	filamin A	3567.53	0.822888	0.119612	6.88018	5.97773e-12	1.99058e-09	5.97773e-12	1.99058e-09	5061.77	4359.78	2496.71	2351.86
ENSCSAG00000002155	FASN	fatty acid synthase	743.473	0.819162	0.135761	6.03478	1.59176e-09	3.24874e-07	1.59176e-09	3.24874e-07	1024.13	965.196	549.618	434.947
ENSCSAG00000019098	H2AC4	histone H2A type 1-B	454.742	0.817051	0.139135	5.87236	4.29642e-09	8.23741e-07	4.29642e-09	8.23741e-07	659.295	562.25	303.355	294.068
ENSCSAG00000007979		serine/threonine-protein kinase SIK1	390.755	0.804605	0.140756	5.71608	1.09012e-08	1.97062e-06	1.09012e-08	1.97062e-06	527.148	520.081	274.383	241.409
ENSCSAG00000000927	ID3	inhibitor of DNA binding 3, HLH protein	240.573	0.800273	0.152736	5.24018	1.60418e-07	2.30673e-05	1.60418e-07	2.30673e-05	349.038	306.895	166.164	140.195
ENSCSAG00000004555	ADM	adrenomedullin	39.3946	0.786469	0.167346	4.73879	2.15002e-06	NA	2.15002e-06	1	64.6367	63.2531	18.7467	10.9421
ENSCSAG00000014360	CREB5	cAMP responsive element binding protein 5	39.6174	0.774922	0.168473	4.61392	3.95137e-06	NA	3.95137e-06	1	64.6367	62.0818	15.3382	16.4131
ENSCSAG00000004553	LRIG3		335.043	0.767628	0.142819	5.37356	7.71989e-08	1.22109e-05	7.71989e-08	1.22109e-05	435.221	455.657	218.143	231.151
ENSCSAG00000010109	MYC	MYC proto-oncogene, bHLH transcription factor	260.717	0.764205	0.150244	5.08557	3.66522e-07	4.93401e-05	3.66522e-07	4.93401e-05	324.62	374.833	180.65	162.763
ENSCSAG00000014618	NUAK2	NUAK family kinase 2	436.352	0.764145	0.141445	5.40226	6.58047e-08	1.06755e-05	6.58047e-08	1.06755e-05	532.894	623.16	314.433	274.919
ENSCSAG00000000221	H2BC18	histone H2B type 2-F	557.429	0.755333	0.134541	5.61387	1.97854e-08	3.47728e-06	1.97854e-08	3.47728e-06	758.404	705.155	361.299	404.856
ENSCSAG00000018011	SERPINE1	serpin family E member 1	1543.86	0.745529	0.121447	6.1389	8.30941e-10	1.81288e-07	8.30941e-10	1.81288e-07	1903.19	2090.87	1128.21	1053.17
ENSCSAG00000010279	DYNC1H1		863.497	0.73228	0.126919	5.76994	7.93021e-09	1.47572e-06	7.93021e-09	1.47572e-06	1090.21	1144.41	637.387	581.981
ENSCSAG00000017470	COL4A1	collagen type IV alpha 1 chain	3049.4	0.725139	0.135261	5.36237	8.21389e-08	1.26754e-05	8.21389e-08	1.26754e-05	4396.73	3539.83	2413.21	1847.84
ENSCSAG00000008728	FAM193B		58.1288	0.715717	0.171746	4.17014	3.04415e-05	NA	3.04415e-05	1	81.8732	89.0229	31.5285	30.0907
ENSCSAG00000010924	CLK1		150.337	0.714358	0.163972	4.35392	1.33727e-05	0.00119168	1.33727e-05	0.00119168	179.546	230.757	84.36	106.685
ENSCSAG00000016117	RND3	Rho family GTPase 3	740.248	0.712834	0.131455	5.42235	5.88192e-08	9.79339e-06	5.88192e-08	9.79339e-06	886.241	1026.11	507.012	541.632
ENSCSAG00000019076	H2BC17	histone cluster 1, H2bo	323.941	0.708369	0.146843	4.82297	1.41433e-06	0.0001627	1.41433e-06	0.0001627	415.111	435.744	199.396	245.512
ENSCSAG00000016366	ITPKB	inositol-trisphosphate 3-kinase B	143.675	0.705984	0.161879	4.3598	1.30184e-05	0.00119168	1.30184e-05	0.00119168	195.347	193.273	86.9163	99.1624
ENSCSAG00000004096	AXIN2	axin 2	89.2131	0.700681	0.169475	4.13378	3.5685e-05	0.00250865	3.5685e-05	0.00250865	117.782	131.192	54.5357	53.3425
ENSCSAG00000005252	YTHDC1	YTH domain containing 1	370.239	0.696847	0.140338	4.96525	6.86122e-07	8.03906e-05	6.86122e-07	8.03906e-05	469.693	490.797	256.488	263.977
ENSCSAG00000019096	H1-2	H1.2 linker histone, cluster member	2289.34	0.694443	0.135936	5.1099	3.22326e-07	4.43339e-05	3.22326e-07	4.43339e-05	3335.25	2572.29	1804.79	1445.04
ENSCSAG00000007028	PRICKLE1	prickle planar cell polarity protein 1	956.025	0.694329	0.129729	5.35218	8.69002e-08	1.30909e-05	8.69002e-08	1.30909e-05	1113.19	1338.86	686.81	685.246
ENSCSAG00000012942	POLRMT		249.39	0.69173	0.159019	4.35452	1.33361e-05	0.00119168	1.33361e-05	0.00119168	390.693	275.268	186.615	144.982
ENSCSAG00000013764	PLEKHG3		187.941	0.679751	0.160642	4.23544	2.28109e-05	0.00180406	2.28109e-05	0.00180406	281.529	220.215	140.6	109.421
ENSCSAG00000018191	BCL2	BCL2 apoptosis regulator	245.237	0.672295	0.153094	4.39187	1.12379e-05	0.00107731	1.12379e-05	0.00107731	291.583	350.235	183.206	155.924
ENSCSAG00000000848	EPHA2	EPH receptor A2	381.572	0.669345	0.140694	4.75828	1.95246e-06	0.000212986	1.95246e-06	0.000212986	517.094	465.028	276.087	268.08
ENSCSAG00000004953	LRP1	LDL receptor related protein 1	1104.08	0.660702	0.125322	5.27263	1.34479e-07	1.97872e-05	1.34479e-07	1.97872e-05	1390.41	1403.28	864.903	757.738
ENSCSAG00000008221	RIPK4	receptor interacting serine/threonine kinase 4	46.4806	0.659513	0.170273	3.88851	0.00010086	NA	0.00010086	1	77.5641	60.9104	25.5636	21.8841
ENSCSAG00000009926	DUSP8	dual specificity phosphatase 8	98.8726	0.658518	0.168046	3.91994	8.85703e-05	0.00500343	8.85703e-05	0.00500343	139.328	130.02	63.9091	62.233
ENSCSAG00000018671	FLRT3	fibronectin leucine rich transmembrane protein 3	411.964	0.656928	0.146559	4.48168	7.40581e-06	0.000743755	7.40581e-06	0.000743755	468.257	595.048	265.862	318.687
ENSCSAG00000019091	H2AC7	histone H2A type 1-D	379.649	0.65651	0.141343	4.64587	3.38644e-06	0.0003571	3.38644e-06	0.0003571	517.094	456.828	278.644	266.029
ENSCSAG00000004846			549.91	0.650548	0.135593	4.79891	1.59528e-06	0.000177077	1.59528e-06	0.000177077	726.804	672.357	427.765	372.714
ENSCSAG00000013369	TIAM2		189.076	0.649711	0.160388	4.04935	5.13597e-05	0.00342056	5.13597e-05	0.00342056	216.892	282.296	114.184	142.931
ENSCSAG00000009681	CAD	carbamoyl-phosphate synthetase 2, aspartate transcarbamylase, and dihydroorotase	286.586	0.645589	0.147297	4.38399	1.16527e-05	0.0011004	1.16527e-05	0.0011004	395.002	343.207	203.657	204.48
ENSCSAG00000016138	PDE4D		158.633	0.644969	0.161211	3.99956	6.34595e-05	0.00389814	6.34595e-05	0.00389814	188.165	230.757	101.402	114.208
ENSCSAG00000019099		histone H3.1	1874.87	0.640348	0.127351	5.02898	4.93109e-07	6.49979e-05	4.93109e-07	6.49979e-05	2559.61	2163.49	1492.06	1284.32
ENSCSAG00000005833	FNBP4	formin binding protein 4	142.263	0.637776	0.16827	3.78931	0.000151068	0.0078345	0.000151068	0.0078345	149.383	235.442	77.543	106.685
ENSCSAG00000001782	TXNIP	thioredoxin interacting protein	1343.35	0.635404	0.126789	5.01161	5.39763e-07	6.96956e-05	5.39763e-07	6.96956e-05	1535.48	1841.37	974.826	1021.71
ENSCSAG00000000205		histone H3	1222.58	0.630242	0.126383	4.98749	6.11693e-07	7.3516e-05	6.11693e-07	7.3516e-05	1661.88	1406.8	923.699	897.933
ENSCSAG00000019090	H1-3	H1.3 linker histone, cluster member	233.881	0.627614	0.150826	4.16124	3.16526e-05	0.00227575	3.16526e-05	0.00227575	288.711	312.752	164.459	169.602
ENSCSAG00000017164	POLG	DNA polymerase gamma, catalytic subunit	321.956	0.626443	0.145777	4.29889	1.71658e-05	0.00142905	1.71658e-05	0.00142905	429.475	392.404	250.524	215.422
ENSCSAG00000008732	TRIM24	tripartite motif containing 24	790.067	0.625341	0.133975	4.66748	3.04916e-06	0.000326984	3.04916e-06	0.000326984	916.405	1075.3	539.393	629.168
ENSCSAG00000013953	PLCG1		255.77	0.622978	0.148554	4.19455	2.73414e-05	0.00204344	2.73414e-05	0.00204344	328.929	325.636	190.023	178.492
ENSCSAG00000005489	RAG1		22.4041	0.622601	0.153729	4.1308	3.61501e-05	NA	3.61501e-05	1	41.6548	33.9693	8.52121	5.47103
ENSCSAG00000016152	PLK2	polo like kinase 2	1382.01	0.621793	0.124396	4.99867	5.77286e-07	7.25359e-05	5.77286e-07	7.25359e-05	1710.72	1744.15	957.784	1115.41
ENSCSAG00000011550	TSC22D2	TSC22 domain family member 2	201.823	0.621508	0.155024	4.00874	6.10443e-05	0.00386227	6.10443e-05	0.00386227	242.747	278.782	138.044	147.718
ENSCSAG00000015684	COL7A1	collagen type VII alpha 1 chain	225.703	0.619943	0.156449	3.9655	7.32416e-05	0.0043717	7.32416e-05	0.0043717	303.074	281.125	183.206	135.408
ENSCSAG00000011587	EPC1	enhancer of polycomb homolog 1	174.315	0.61595	0.162756	3.7831	0.00015489	0.00790664	0.00015489	0.00790664	202.528	255.355	100.55	138.827
ENSCSAG00000007410	ARID5B		451.318	0.611525	0.141214	4.33022	1.48963e-05	0.00127364	1.48963e-05	0.00127364	525.712	614.961	307.616	356.985
ENSCSAG00000006719	ZNF627		106.343	0.609298	0.167773	3.63238	0.000280814	0.0126008	0.000280814	0.0126008	150.819	133.534	63.057	77.9622
ENSCSAG00000005346	PDCD11	programmed cell death 11	221.736	0.607252	0.153639	3.95459	7.66664e-05	0.00449137	7.66664e-05	0.00449137	303.074	265.897	169.572	148.402
ENSCSAG00000017927	FHOD3	formin homology 2 domain containing 3	157.736	0.604841	0.16135	3.74817	0.000178133	0.0089448	0.000178133	0.0089448	180.983	229.585	108.219	112.156
ENSCSAG00000012490	GLUL	glutamate-ammonia ligase	1692.84	0.60357	0.117431	5.14011	2.74575e-07	3.86052e-05	2.74575e-07	3.86052e-05	2102.85	2086.18	1285	1297.32
ENSCSAG00000015009	EEPD1	endonuclease/exonuclease/phosphatase family domain-containing protein 1	47.936	0.603491	0.170445	3.55494	0.000378066	NA	0.000378066	1	80.4368	58.5677	28.12	24.6196
ENSCSAG00000012430	COL5A2	collagen type V alpha 2 chain	3427.72	0.600826	0.125183	4.80014	1.58551e-06	0.000177077	1.58551e-06	0.000177077	4490.1	4025.94	2858.01	2336.81
ENSCSAG00000002293	CEP131		61.0343	0.600583	0.171552	3.51582	0.00043839	NA	0.00043839	1	97.6733	74.9667	43.4582	28.039
ENSCSAG00000008233	LARGE1	LARGE xylosyl- and glucuronyltransferase 1	137.832	0.599339	0.162409	3.69158	0.000222862	0.010368	0.000222862	0.010368	175.237	183.903	100.55	91.6397
ENSCSAG00000016802	CCNB1IP1	cyclin B1 interacting protein 1	26.2819	0.593619	0.158588	3.77899	0.000157463	NA	0.000157463	1	38.782	45.6828	7.66909	12.9937
ENSCSAG00000007471			2711.69	0.592446	0.141314	4.19363	2.74526e-05	0.00204344	2.74526e-05	0.00204344	3888.26	2923.7	2320.33	1714.48
ENSCSAG00000018296			266.052	0.59101	0.147655	4.00377	6.23415e-05	0.00386701	6.23415e-05	0.00386701	338.984	333.836	201.953	189.434
ENSCSAG00000012709	ZFP36L2	ZFP36 ring finger protein like 2	1028.55	0.587453	0.14549	4.03815	5.38737e-05	0.00355061	5.38737e-05	0.00355061	1025.57	1564.93	741.345	782.357
ENSCSAG00000012302	VPS13B	vacuolar protein sorting 13 homolog B	1002.32	0.586353	0.136882	4.28364	1.8386e-05	0.00151076	1.8386e-05	0.00151076	1130.42	1371.66	668.063	839.119
ENSCSAG00000001977	DHX37	DEAH-box helicase 37	107.651	0.585008	0.166646	3.51212	0.00044454	0.0173617	0.00044454	0.0173617	145.074	138.22	74.1345	73.175
ENSCSAG00000017614	PIBF1		269.069	0.584963	0.158153	3.69796	0.000217338	0.0103391	0.000217338	0.0103391	282.965	407.631	169.572	216.106
ENSCSAG00000004200	NUMA1	nuclear mitotic apparatus protein 1	695.146	0.584067	0.140209	4.16728	3.08259e-05	0.00224179	3.08259e-05	0.00224179	972.424	767.237	568.365	472.56
ENSCSAG00000019083		histone H2B type 1-F/J/L	387.457	0.580915	0.146151	3.97474	7.04556e-05	0.00424545	7.04556e-05	0.00424545	488.366	487.283	247.967	326.21
ENSCSAG00000000206		histone H2A type 2-A	848.228	0.579591	0.135468	4.27969	1.87157e-05	0.00151813	1.87157e-05	0.00151813	1144.79	965.196	703	579.929
ENSCSAG00000018063	AKAP17A		90.4117	0.576672	0.1712	3.3782	0.000729614	0.0242962	0.000729614	0.0242962	132.146	112.45	73.2824	43.7682
ENSCSAG00000014785	CSRNP1	cysteine and serine rich nuclear protein 1	115.942	0.575396	0.166301	3.46329	0.000533605	0.0191825	0.000533605	0.0191825	166.619	137.048	83.5079	76.5944
ENSCSAG00000003049	ACLY		591.59	0.574242	0.131587	4.36471	1.27291e-05	0.00118437	1.27291e-05	0.00118437	758.404	706.327	448.216	453.412
ENSCSAG00000011558	IFT140	intraflagellar transport 140	150.632	0.573826	0.162559	3.53347	0.00041014	0.0164238	0.00041014	0.0164238	211.147	178.046	117.593	95.743
ENSCSAG00000007131		ribosomal protein L23a	505.938	0.573381	0.142319	4.0287	5.6086e-05	0.00358441	5.6086e-05	0.00358441	551.567	712.183	361.299	398.701
ENSCSAG00000008502	CPSF1	cleavage and polyadenylation specific factor 1	660.62	0.571878	0.135154	4.23256	2.31045e-05	0.00180472	2.31045e-05	0.00180472	883.369	755.524	535.132	468.457
ENSCSAG00000000217	H2AC20	histone cluster 2 H2A family member c	508.668	0.571171	0.137403	4.15762	3.21587e-05	0.00228615	3.21587e-05	0.00228615	672.222	592.705	362.151	407.592
ENSCSAG00000003794			684.305	0.570093	0.131531	4.33443	1.46139e-05	0.0012666	1.46139e-05	0.0012666	800.059	891.401	499.343	546.419
ENSCSAG00000009057	ELAC2	elaC ribonuclease Z 2	124.262	0.567669	0.166047	3.42291	0.000619551	0.0214202	0.000619551	0.0214202	182.419	141.734	92.8812	80.0138
ENSCSAG00000002772	NR1D1	nuclear receptor subfamily 1 group D member 1	33.723	0.565826	0.165713	3.42943	0.000604853	NA	0.000604853	1	44.5275	56.225	17.0424	17.097
ENSCSAG00000001373	LRRC7		222.155	0.565022	0.15694	3.59967	0.000318618	0.0138075	0.000318618	0.0138075	241.31	323.294	151.678	172.337
ENSCSAG00000006392	DDB1	damage specific DNA binding protein 1	708.757	0.56323	0.129567	4.34779	1.37517e-05	0.00120843	1.37517e-05	0.00120843	917.841	828.147	545.357	543.684
ENSCSAG00000016125	WFS1	wolframin ER transmembrane glycoprotein	203.427	0.563114	0.155481	3.62323	0.000290952	0.012788	0.000290952	0.012788	245.62	269.411	161.903	136.776
ENSCSAG00000006660	NCL		1068.91	0.558589	0.123347	4.52918	5.92139e-06	0.000614174	5.92139e-06	0.000614174	1330.08	1287.32	858.086	800.138
ENSCSAG00000004544	RFWD3	ring finger and WD repeat domain 3	428.527	0.55846	0.138434	4.03454	5.47103e-05	0.00355883	5.47103e-05	0.00355883	530.021	531.795	307.616	344.675
ENSCSAG00000019086	H2BC12	histone H2B type 1-K	607.6	0.557545	0.130447	4.27483	1.91283e-05	0.00153196	1.91283e-05	0.00153196	755.531	739.125	472.075	463.67
ENSCSAG00000003876	PPFIA2		118.671	0.556302	0.166757	3.33512	0.000852619	0.0273017	0.000852619	0.0273017	137.892	171.018	74.1345	91.6397
ENSCSAG00000012353		ribosomal protein L30	3161.46	0.555886	0.126226	4.40407	1.06237e-05	0.00105025	1.06237e-05	0.00105025	3626.84	4123.17	2202.73	2693.11
ENSCSAG00000009672	IP6K3	inositol hexakisphosphate kinase 3	56.3888	0.554673	0.17102	3.25945	0.00111628	NA	0.00111628	1	96.2369	62.0818	39.1976	28.039
ENSCSAG00000011901	TCF12	transcription factor 12	413.943	0.55237	0.148198	3.72687	0.000193874	0.00945895	0.000193874	0.00945895	455.33	578.649	274.383	347.41
ENSCSAG00000017996	SRRT		172.577	0.549488	0.159062	3.45721	0.0005458	0.0194004	0.0005458	0.0194004	228.383	209.672	138.044	114.208
ENSCSAG00000013729	TOP3B	DNA topoisomerase III beta	79.3742	0.549085	0.170488	3.22264	0.00127015	NA	0.00127015	1	107.728	103.079	51.9794	54.7103
ENSCSAG00000005123			114.757	0.546187	0.166682	3.27731	0.00104802	0.0312775	0.00104802	0.0312775	130.71	166.332	82.6557	79.3299
ENSCSAG00000012919	PPP1R9A		354.046	0.54593	0.146501	3.72625	0.000194352	0.00945895	0.000194352	0.00945895	397.875	482.598	247.115	288.597
ENSCSAG00000019079	H2BC15	histone H2B type 1-N	159.688	0.54246	0.162663	3.33454	0.000854392	0.0273017	0.000854392	0.0273017	201.092	207.33	96.2897	134.04
ENSCSAG00000001260	FAF1	Fas associated factor 1	293.191	0.540538	0.145454	3.71701	0.000201591	0.00973639	0.000201591	0.00973639	351.911	374.833	225.812	220.209
ENSCSAG00000007378	DNMT1	DNA methyltransferase 1	571.702	0.540104	0.135577	3.98498	6.74847e-05	0.00410554	6.74847e-05	0.00410554	739.731	664.158	471.223	411.695
ENSCSAG00000001485	F3		45.6203	0.539779	0.170347	3.17263	0.00151066	NA	0.00151066	1	61.764	66.7672	23.8594	30.0907
ENSCSAG00000011617	PTK7	protein tyrosine kinase 7 (inactive)	700.913	0.539738	0.133	4.05928	4.92246e-05	0.00331324	4.92246e-05	0.00331324	916.405	801.206	575.182	510.857
ENSCSAG00000010845			354.192	0.538163	0.150651	3.57476	0.000350544	0.0147116	0.000350544	0.0147116	488.366	394.746	302.503	231.151
ENSCSAG00000010268	BABAM2	BRISC and BRCA1 A complex member 2	193.237	0.536675	0.155096	3.46083	0.00053851	0.0192495	0.00053851	0.0192495	234.129	250.67	139.748	148.402
ENSCSAG00000010084	TFIP11	tuftelin interacting protein 11	141.499	0.534702	0.163544	3.27179	0.00106868	0.0314143	0.00106868	0.0314143	170.928	189.759	115.036	90.272
ENSCSAG00000000907	HSPG2	heparan sulfate proteoglycan 2	2762.92	0.533636	0.123845	4.30934	1.63745e-05	0.00138135	1.63745e-05	0.00138135	3379.78	3333.67	2388.5	1949.74
ENSCSAG00000007240	COL6A2	collagen type VI alpha 2 chain	607.962	0.531898	0.145846	3.64886	0.000263403	0.0119039	0.000263403	0.0119039	828.786	674.7	535.132	393.23
ENSCSAG00000010760	ZCCHC7	zinc finger CCHC-type containing 7	208.578	0.531867	0.155108	3.42912	0.000605533	0.0211669	0.000605533	0.0211669	255.674	267.069	140.6	170.97
ENSCSAG00000006125	HNF1B	HNF1 homeobox B	647.579	0.531303	0.137359	3.86815	0.000109662	0.00603333	0.000109662	0.00603333	698.077	889.058	501.899	501.283
ENSCSAG00000004520	ZNF143	zinc finger protein 143	60.7867	0.530985	0.171774	3.09244	0.0019852	NA	0.0019852	1	73.2549	91.3656	37.4933	41.0327
ENSCSAG00000006762	MTMR10	myotubularin related protein 10	676.721	0.530703	0.142305	3.72922	0.000192077	0.00945895	0.000192077	0.00945895	749.786	917.17	452.476	587.452
ENSCSAG00000003312	ZNF180		60.0209	0.528359	0.171768	3.08188	0.00205699	NA	0.00205699	1	80.4368	81.9948	43.4582	34.1939
ENSCSAG00000004371	SF3B3	splicing factor 3b subunit 3	860.672	0.528084	0.124918	4.22801	2.35772e-05	0.00181918	2.35772e-05	0.00181918	1051.42	1037.82	679.14	674.304
ENSCSAG00000009420	DHCR7	7-dehydrocholesterol reductase	375.048	0.527904	0.145719	3.62466	0.000289337	0.012788	0.000289337	0.012788	514.221	412.317	304.207	269.448
ENSCSAG00000011564	TCOF1	treacle ribosome biogenesis factor 1	204.898	0.52656	0.15502	3.39833	0.000677994	0.0231874	0.000677994	0.0231874	277.22	235.442	148.269	158.66
ENSCSAG00000008773	DBN1	drebrin 1	669.373	0.526194	0.13654	3.85502	0.00011572	0.00623697	0.00011572	0.00623697	854.641	782.465	576.034	464.354
ENSCSAG00000015940	LAMA5	laminin subunit alpha 5	1021	0.525121	0.135698	3.87083	0.000108466	0.00601985	0.000108466	0.00601985	1318.59	1176.04	897.283	692.085
ENSCSAG00000011392	PARD3	par-3 family cell polarity regulator	617.629	0.524835	0.130165	4.03277	5.51234e-05	0.00355883	5.51234e-05	0.00355883	762.713	740.296	484.005	483.502
ENSCSAG00000012319	STK3	serine/threonine kinase 3	923.155	0.524151	0.126998	4.12744	3.66819e-05	0.0025504	3.66819e-05	0.0025504	1067.22	1173.7	695.331	756.37
ENSCSAG00000008978	GLDC	glycine decarboxylase	65.6257	0.522699	0.171675	3.04967	0.00229095	NA	0.00229095	1	94.8005	80.8234	45.1624	41.7166
ENSCSAG00000011641	RRBP1	ribosome binding protein 1	245.37	0.521378	0.15	3.47748	0.000506154	0.0185112	0.000506154	0.0185112	308.82	298.695	196.84	177.125
ENSCSAG00000015307	EXOC6B		192.248	0.521028	0.157297	3.31229	0.00092534	0.0288608	0.00092534	0.0288608	229.819	251.841	128.67	158.66
ENSCSAG00000018028	DYM		124.406	0.519731	0.167237	3.10689	0.00189067	0.0469109	0.00189067	0.0469109	132.146	187.417	80.9515	97.1108
ENSCSAG00000003355	LRBA		218.486	0.519264	0.157117	3.30444	0.000951652	0.0293144	0.000951652	0.0293144	245.62	301.038	144.008	183.279
ENSCSAG00000003431	TAF1D	TATA-box binding protein associated factor, RNA polymerase I subunit D	101.991	0.518387	0.168191	3.08211	0.00205542	0.0491038	0.00205542	0.0491038	117.782	145.248	69.0218	75.9105
ENSCSAG00000013731			720.485	0.517628	0.134192	3.85852	0.000114078	0.00622215	0.000114078	0.00622215	950.878	803.549	598.189	529.322
ENSCSAG00000003779	KANSL1	KAT8 regulatory NSL complex subunit 1	586.214	0.51743	0.134676	3.8423	0.000121888	0.00648054	0.000121888	0.00648054	656.422	770.751	453.328	464.354
ENSCSAG00000002988	PIEZO1	piezo type mechanosensitive ion channel component 1	582.033	0.517395	0.134297	3.85375	0.000116321	0.00623697	0.000116321	0.00623697	741.168	675.871	482.301	428.792
ENSCSAG00000010141	NSMCE2	NSE2 (MMS21) homolog, SMC5-SMC6 complex SUMO ligase	269.218	0.513652	0.147583	3.48149	0.000498634	0.0185112	0.000498634	0.0185112	321.747	340.864	213.882	200.376
ENSCSAG00000001250	TRABD2B	TraB domain containing 2B	545.114	0.512781	0.135571	3.78299	0.000154959	0.00790664	0.000154959	0.00790664	620.513	705.155	446.511	408.276
ENSCSAG00000009474	NUP210		264.673	0.512734	0.147655	3.47375	0.000513245	0.018556	0.000513245	0.018556	324.62	326.808	209.622	197.641
ENSCSAG00000010968	PHRF1	PHD and ring finger domains 1	357.791	0.510722	0.147076	3.47451	0.000511784	0.018556	0.000511784	0.018556	468.257	411.145	307.616	244.145
ENSCSAG00000017595	LMO7		199.429	0.510585	0.155501	3.28578	0.00101702	0.0304961	0.00101702	0.0304961	262.856	233.1	160.199	141.563
ENSCSAG00000013954	KLF6	Kruppel like factor 6	64.7027	0.510117	0.171775	2.97554	0.00292475	NA	0.00292475	1	80.4368	92.537	50.2751	35.5617
ENSCSAG00000016859	WDR33	WD repeat domain 33	683.531	0.509567	0.129193	3.94467	7.9909e-05	0.00455482	7.9909e-05	0.00455482	797.186	856.26	541.097	539.58
ENSCSAG00000017612	KLF12		39.0976	0.508924	0.167441	3.0451	0.00232605	NA	0.00232605	1	47.4003	64.4245	17.8945	26.6713
ENSCSAG00000010542	TLN1	talin 1	707.495	0.508793	0.134117	3.79479	0.00014777	0.00772677	0.00014777	0.00772677	914.969	802.378	599.041	513.593
ENSCSAG00000015888	PIK3R1	phosphoinositide-3-kinase regulatory subunit 1	319.942	0.508699	0.144524	3.52028	0.000431096	0.0169413	0.000431096	0.0169413	367.711	415.831	244.559	251.667
ENSCSAG00000004075	ARHGEF17	Rho guanine nucleotide exchange factor 17	276.954	0.50865	0.15061	3.37942	0.000726387	0.0242962	0.000726387	0.0242962	356.22	326.808	236.038	188.751
ENSCSAG00000008888	SCRIB		466.916	0.508559	0.143595	3.54338	0.00039504	0.0161253	0.00039504	0.0161253	619.076	523.595	402.201	322.791
ENSCSAG00000017151	KIF7	kinesin family member 7	123.775	0.507894	0.166564	3.05324	0.00226384	0.0515227	0.00226384	0.0515227	183.856	132.363	92.0291	86.8526
ENSCSAG00000000272	H2BU1	histone cluster 3, H2bb	39.788	0.507797	0.167246	3.04224	0.00234821	NA	0.00234821	1	45.9639	67.9385	17.8945	27.3551
ENSCSAG00000019415	ENC1	ectodermal-neural cortex 1	162.927	0.505241	0.161558	3.127	0.001766	0.0443391	0.001766	0.0443391	193.91	215.529	104.811	137.46
ENSCSAG00000011297	ABCA1	ATP binding cassette subfamily A member 1	207.782	0.504972	0.154333	3.27392	0.00106065	0.0313586	0.00106065	0.0313586	277.22	237.785	160.199	155.924
ENSCSAG00000014277	SPTAN1	spectrin alpha, non-erythrocytic 1	643.31	0.50496	0.135415	3.73006	0.000191435	0.00945895	0.000191435	0.00945895	788.568	771.922	557.287	455.463
ENSCSAG00000000219	H2BC21	histone cluster 2 H2B family member e	360.15	0.504694	0.143371	3.52118	0.000429627	0.0169413	0.000429627	0.0169413	469.693	411.145	265.01	294.752
ENSCSAG00000015160	LAMB2	laminin subunit beta 2	137.444	0.504307	0.167726	3.01264	0.00258983	0.0571782	0.00258983	0.0571782	198.219	153.447	120.149	77.9622
ENSCSAG00000012446	AARS2	alanyl-tRNA synthetase 2, mitochondrial	99.964	0.503743	0.16865	2.9911	0.00277973	0.060025	0.00277973	0.060025	135.019	121.821	80.0994	62.9168
ENSCSAG00000008527	ATF7IP2	activating transcription factor 7 interacting protein 2	71.6155	0.503445	0.171262	2.94266	0.00325403	NA	0.00325403	1	91.9278	96.0511	51.9794	46.5037
ENSCSAG00000011685	SVIL		254.188	0.501164	0.14847	3.37664	0.00073377	0.0243066	0.00073377	0.0243066	307.384	316.266	200.248	192.854
ENSCSAG00000007389			235.901	0.500212	0.151086	3.3121	0.000925992	0.0288608	0.000925992	0.0288608	281.529	298.695	191.727	171.654
ENSCSAG00000016447	NCKAP5	NCK associated protein 5	143.941	0.500192	0.165017	3.03065	0.00244029	0.0549457	0.00244029	0.0549457	149.383	214.358	100.55	111.472
ENSCSAG00000016270	ZBTB49	zinc finger and BTB domain containing 49	54.6423	0.499657	0.171657	2.91491	0.00355797	NA	0.00355797	1	73.2549	73.7953	36.6412	34.8778
ENSCSAG00000016212	DIDO1	death inducer-obliterator 1	416.997	0.497951	0.139362	3.57434	0.000351107	0.0147116	0.000351107	0.0147116	517.094	495.483	347.665	307.745
ENSCSAG00000019094		histone H2B type 1-C/E/F/G/I	444.287	0.497538	0.142607	3.48933	0.00048423	0.0184618	0.00048423	0.0184618	563.058	520.081	307.616	386.391
ENSCSAG00000010133	TRIB1	tribbles pseudokinase 1	142.9	0.4969	0.161532	3.07696	0.0020912	0.0491957	0.0020912	0.0491957	173.801	183.903	103.107	110.788
ENSCSAG00000006147	NOTCH3		185.361	0.496891	0.160934	3.09118	0.00199362	0.0481435	0.00199362	0.0481435	257.111	206.158	158.495	119.679
ENSCSAG00000013452	PRIM2	DNA primase subunit 2	90.7913	0.496373	0.169304	2.9323	0.0033646	0.0677956	0.0033646	0.0677956	110.601	122.992	60.5006	69.0717
ENSCSAG00000010767	GEMIN5	gem nuclear organelle associated protein 5	191.608	0.495777	0.154844	3.20305	0.00135978	0.0369825	0.00135978	0.0369825	235.565	237.785	147.417	145.666
ENSCSAG00000005047	UBE2O	ubiquitin conjugating enzyme E2 O	164.177	0.495525	0.161008	3.08039	0.00206731	0.0491725	0.00206731	0.0491725	232.692	178.046	123.558	122.414
ENSCSAG00000016856	PRAG1	PEAK1 related, kinase-activating pseudokinase 1	31.1537	0.493299	0.164526	3.01224	0.00259325	NA	0.00259325	1	45.9639	44.5115	17.0424	17.097
ENSCSAG00000015501	COBLL1		326.015	0.493171	0.153149	3.2198	0.00128279	0.0356136	0.00128279	0.0356136	336.111	466.199	227.516	274.235
ENSCSAG00000005937	TNKS1BP1		267.074	0.492573	0.157657	3.1276	0.00176238	0.0443391	0.00176238	0.0443391	376.329	285.81	235.185	170.97
ENSCSAG00000017573			53.9001	0.492082	0.171341	2.87782	0.00400429	NA	0.00400429	1	64.6367	80.8234	40.0497	30.0907
ENSCSAG00000015807	HK2	hexokinase 2	430.154	0.491015	0.136764	3.59105	0.000329343	0.0139849	0.000329343	0.0139849	519.966	520.081	339.996	340.572
ENSCSAG00000004975		factor interacting with PAPOLA and CPSF1	286.889	0.490942	0.146724	3.34652	0.000818342	0.0264991	0.000818342	0.0264991	341.856	358.434	211.326	235.938
ENSCSAG00000010955	NOP56		1911.27	0.490675	0.122567	4.0038	6.23325e-05	0.00386701	6.23325e-05	0.00386701	2342.72	2233.77	1652.26	1416.31
ENSCSAG00000003570	CDK17	cyclin dependent kinase 17	417.135	0.490152	0.138505	3.53937	0.00040108	0.0162669	0.00040108	0.0162669	481.184	528.281	324.658	334.417
ENSCSAG00000017030	IQGAP1	IQ motif containing GTPase activating protein 1	599.731	0.489646	0.13619	3.59544	0.000323842	0.0139384	0.000323842	0.0139384	656.422	791.836	457.589	493.077
ENSCSAG00000018202	GTF2IRD1		116.483	0.488946	0.16788	2.9173	0.00353081	0.0702497	0.00353081	0.0702497	173.801	122.992	91.177	77.9622
ENSCSAG00000008427	PC	pyruvate carboxylase	112.752	0.488006	0.168478	2.90063	0.00372413	0.0725002	0.00372413	0.0725002	172.365	115.964	79.2473	83.4332
ENSCSAG00000012304	KPNA4		500.567	0.487707	0.140198	3.47876	0.000503742	0.0185112	0.000503742	0.0185112	573.112	639.559	355.334	434.263
ENSCSAG00000005234	SORCS3	sortilin related VPS10 domain containing receptor 3	170.284	0.487303	0.162168	3.00467	0.00265873	0.0580062	0.00265873	0.0580062	175.237	249.498	124.41	131.989
ENSCSAG00000002537			2273.16	0.487284	0.116363	4.18783	2.8163e-05	0.00207195	2.8163e-05	0.00207195	2621.38	2798.37	1824.39	1848.52
ENSCSAG00000010453	OGDHL	oxoglutarate dehydrogenase L	257.583	0.483828	0.148721	3.25485	0.00113453	0.032334	0.00113453	0.032334	327.493	301.038	206.213	195.589
ENSCSAG00000003902	UVRAG	UV radiation resistance associated	193.983	0.482851	0.154656	3.1231	0.00178955	0.0447529	0.00178955	0.0447529	235.565	241.299	146.565	152.505
ENSCSAG00000013420	CRPPA		64.004	0.482779	0.171702	2.81446	0.00488586	NA	0.00488586	1	87.6187	80.8234	41.7539	45.8199
ENSCSAG00000009336	SDCCAG8	SHH signaling and ciliogenesis regulator SDCCAG8	295.595	0.482658	0.144946	3.33076	0.000866092	0.0275365	0.000866092	0.0275365	354.784	363.12	229.221	235.254
ENSCSAG00000017347	ADAMTS16		916.157	0.481787	0.126065	3.82199	0.000132379	0.00697968	0.000132379	0.00697968	1048.55	1143.24	715.782	757.054
ENSCSAG00000008670	DOP1B	DOP1 leucine zipper like protein B	146.121	0.481421	0.160881	2.9936	0.00275711	0.0597406	0.00275711	0.0597406	176.674	186.245	110.776	110.788
ENSCSAG00000012729	SHROOM4	shroom family member 4	138.223	0.480289	0.162096	2.96405	0.00303618	0.0638204	0.00303618	0.0638204	170.928	173.36	100.55	108.053
ENSCSAG00000017309	ADAMTSL3		455.309	0.480198	0.138044	3.47982	0.000501753	0.0185112	0.000501753	0.0185112	565.93	531.795	384.307	339.204
ENSCSAG00000010958	TRPS1	transcriptional repressor GATA binding 1	282.729	0.480034	0.15379	3.12135	0.00180024	0.0448429	0.00180024	0.0448429	287.274	405.289	218.143	220.209
ENSCSAG00000001884	SFSWAP	splicing factor SWAP	132.377	0.478293	0.16349	2.9261	0.00343242	0.0689425	0.00343242	0.0689425	152.255	178.046	97.9939	101.214
ENSCSAG00000005928	BRIP1		184.296	0.477267	0.161134	2.96128	0.00306364	0.0639725	0.00306364	0.0639725	199.656	257.698	121.853	157.976
ENSCSAG00000005877	RRP12	ribosomal RNA processing 12 homolog	124.423	0.476919	0.168382	2.83799	0.00453986	0.083499	0.00453986	0.083499	189.601	126.506	102.255	79.3299
ENSCSAG00000011216		ribosomal protein S2	1430.13	0.475431	0.120209	3.95535	7.6422e-05	0.00449137	7.6422e-05	0.00449137	1644.65	1758.2	1177.63	1140.03
ENSCSAG00000001495	DPYD	dihydropyrimidine dehydrogenase	639.952	0.475056	0.131632	3.60948	0.000306809	0.0133875	0.000306809	0.0133875	725.368	807.063	527.463	499.915
ENSCSAG00000017763	LAMA3	laminin subunit alpha 3	375.048	0.475014	0.140169	3.38957	0.000700035	0.0235592	0.000700035	0.0235592	452.457	452.143	287.165	308.429
ENSCSAG00000016608	ARHGEF40		244.928	0.474883	0.157489	3.01844	0.00254079	0.0564055	0.00254079	0.0564055	341.856	261.212	213.882	162.763
ENSCSAG00000007419	CARD10		185.232	0.474112	0.164326	2.88971	0.003856	0.0746084	0.003856	0.0746084	274.347	188.588	161.051	116.943
ENSCSAG00000014710	PELI1	pellino E3 ubiquitin protein ligase 1	371.719	0.473841	0.147164	3.21967	0.00128337	0.0356136	0.00128337	0.0356136	399.311	502.511	268.418	316.636
ENSCSAG00000015999	SH3TC1	SH3 domain and tetratricopeptide repeats 1	101.969	0.473634	0.168327	2.81745	0.0048406	0.0855488	0.0048406	0.0855488	145.074	113.621	76.6909	72.4911
ENSCSAG00000007697	CDKAL1	CDK5 regulatory subunit associated protein 1 like 1	127.917	0.473551	0.164119	2.88661	0.00389421	0.0748949	0.00389421	0.0748949	147.946	171.018	99.6982	93.0075
ENSCSAG00000017571	PTPRM	protein tyrosine phosphatase receptor type M	288.308	0.473338	0.145684	3.24986	0.00115462	0.0327592	0.00115462	0.0327592	344.729	353.749	221.551	233.203
ENSCSAG00000017399	SLC12A7	solute carrier family 12 member 7	294.193	0.47295	0.149029	3.17555	0.00149554	0.0392625	0.00149554	0.0392625	392.129	323.294	244.559	216.79
ENSCSAG00000017369	SNRNP200	small nuclear ribonucleoprotein U5 subunit 200	1238.87	0.472567	0.125527	3.76524	0.000166391	0.00842207	0.000166391	0.00842207	1488.08	1465.36	1078.79	923.236
ENSCSAG00000007565	CCDC91	coiled-coil domain containing 91	138.09	0.472025	0.165265	2.85594	0.00429098	0.0808007	0.00429098	0.0808007	168.055	178.046	85.2121	121.047
ENSCSAG00000012925	CWC22	CWC22 spliceosome associated protein homolog	350.153	0.470729	0.14654	3.21226	0.00131695	0.0363856	0.00131695	0.0363856	387.82	460.342	252.228	300.223
ENSCSAG00000015853	RAB3GAP2	RAB3 GTPase activating non-catalytic protein subunit 2	265.375	0.47048	0.147608	3.18814	0.0014319	0.0381353	0.0014319	0.0381353	313.129	330.322	205.361	212.686
ENSCSAG00000002514	NLRX1	NLR family member X1	125.205	0.469728	0.16422	2.86135	0.00421839	0.0799095	0.00421839	0.0799095	156.564	155.79	88.6206	99.8463
ENSCSAG00000016696			2419.69	0.468943	0.11501	4.07767	4.54898e-05	0.003114	4.54898e-05	0.003114	2910.09	2821.79	1968.4	1978.46
ENSCSAG00000004029	CEP95	centrosomal protein 95	55.7828	0.466594	0.171678	2.72094	0.00650965	NA	0.00650965	1	77.5641	70.2813	34.937	40.3488
ENSCSAG00000014122	OSBPL3	oxysterol binding protein like 3	442.575	0.466517	0.144707	3.22384	0.00126483	0.0354335	0.00126483	0.0354335	461.075	606.762	336.588	365.875
ENSCSAG00000014933	SSBP2	single stranded DNA binding protein 2	47.6595	0.466358	0.17033	2.74141	0.00611763	NA	0.00611763	1	51.7094	77.3094	31.5285	30.0907
ENSCSAG00000009868	RANBP17		181.964	0.46567	0.158237	2.94321	0.00324828	0.066511	0.00324828	0.066511	198.219	248.327	139.748	141.563
ENSCSAG00000016929	MEF2A	myocyte enhancer factor 2A	183.62	0.464546	0.158235	2.93587	0.00332615	0.0672395	0.00332615	0.0672395	201.092	249.498	135.487	148.402
ENSCSAG00000004762	RPS13		161.487	0.46403	0.167535	2.76874	0.00562729	0.0946912	0.00562729	0.0946912	170.928	235.442	91.177	148.402
ENSCSAG00000004684	BTBD10	BTB domain containing 10	96.2829	0.463904	0.168379	2.7567	0.00583888	0.0972173	0.00583888	0.0972173	124.964	118.307	67.3176	74.5428
ENSCSAG00000013751	CLUH	clustered mitochondria homolog	413.275	0.463196	0.144587	3.2053	0.00134922	0.0369546	0.00134922	0.0369546	551.567	445.115	352.778	303.642
ENSCSAG00000007398	FGD4		99.1633	0.463193	0.169683	2.73269	0.00628198	0.10121	0.00628198	0.10121	112.037	139.391	84.36	60.8652
ENSCSAG00000018578		ribosomal protein L12	92.7316	0.462997	0.170851	2.71049	0.00671843	0.105217	0.00671843	0.105217	124.964	113.621	50.2751	82.0654
ENSCSAG00000007511	EDN1	endothelin 1	132.309	0.46288	0.163083	2.84036	0.00450629	0.0833967	0.00450629	0.0833967	172.365	155.79	100.55	100.53
ENSCSAG00000004237	NUP98	nucleoporin 98 and 96 precursor	578.717	0.462133	0.132625	3.48505	0.000492045	0.0185112	0.000492045	0.0185112	702.386	679.385	444.807	488.289
ENSCSAG00000003117	BANP		123.54	0.461464	0.166245	2.77935	0.0054467	0.0921137	0.0054467	0.0921137	178.11	131.192	94.5854	90.272
ENSCSAG00000011566	KMT2E	lysine methyltransferase 2E (inactive)	348.93	0.461078	0.150798	3.05735	0.00223301	0.0511982	0.00223301	0.0511982	356.22	489.626	256.488	293.384
ENSCSAG00000002273	GCN1	GCN1 activator of EIF2AK4	658.554	0.460756	0.135475	3.40205	0.000668814	0.0229977	0.000668814	0.0229977	802.932	770.751	584.555	475.98
ENSCSAG00000009793	MOB3B		151.795	0.460387	0.16483	2.79426	0.00520185	0.0892848	0.00520185	0.0892848	156.564	220.215	127.818	102.582
ENSCSAG00000016413	CCNT2	cyclin T2	145.653	0.460089	0.162597	2.82968	0.00465947	0.0843609	0.00465947	0.0843609	160.874	199.13	105.663	116.943
ENSCSAG00000010159	SQLE	squalene epoxidase	343.484	0.460052	0.144076	3.19385	0.00140391	0.0376378	0.00140391	0.0376378	428.039	399.432	253.08	293.384
ENSCSAG00000012486	DNAJC1	DnaJ heat shock protein family (Hsp40) member C1	134.374	0.459991	0.162593	2.83059	0.00464622	0.0843609	0.00464622	0.0843609	162.31	169.846	104.811	100.53
ENSCSAG00000002962	NUAK1	NUAK family kinase 1	846.411	0.459296	0.127865	3.59269	0.000327282	0.0139849	0.000327282	0.0139849	998.278	1013.22	728.563	645.581
ENSCSAG00000016701	EYA4		46.1837	0.458123	0.170535	2.69068	0.00713056	NA	0.00713056	1	66.0731	58.5677	27.2679	32.8262
ENSCSAG00000013407	GPHN		101.364	0.457351	0.169691	2.69483	0.00704242	0.107887	0.00704242	0.107887	101.982	154.619	71.5782	77.2783
ENSCSAG00000014902	XRCC4	X-ray repair cross complementing 4	111.269	0.456048	0.165965	2.74952	0.00596818	0.0978256	0.00596818	0.0978256	137.892	139.391	84.36	83.4332
ENSCSAG00000013329	KLHL3	kelch like family member 3	24.245	0.455787	0.156398	2.95104	0.00316701	NA	0.00316701	1	38.782	33.9693	15.3382	8.89042
ENSCSAG00000002283	SLC38A10	solute carrier family 38 member 10	295.072	0.454828	0.146801	3.09984	0.00193625	0.0472508	0.00193625	0.0472508	382.075	329.151	238.594	230.467
ENSCSAG00000012281	CBFA2T2	CBFA2/RUNX1 partner transcriptional co-repressor 2	101.221	0.45471	0.16847	2.70176	0.00689738	0.106438	0.00689738	0.106438	120.655	133.534	84.36	66.3362
ENSCSAG00000018231	ZNF407	zinc finger protein 407	86.2765	0.454612	0.170221	2.67147	0.00755203	0.112959	0.00755203	0.112959	94.8005	124.164	63.9091	62.233
ENSCSAG00000003964	EDC4	enhancer of mRNA decapping 4	197.948	0.451183	0.156429	2.88658	0.00389449	0.0748949	0.00389449	0.0748949	249.929	231.928	170.424	139.511
ENSCSAG00000009768	NID1	nidogen 1	486.563	0.450773	0.136828	3.29474	0.000985124	0.0296804	0.000985124	0.0296804	548.694	611.447	375.785	410.327
ENSCSAG00000007854	CARMIL1		227.294	0.449163	0.156244	2.87452	0.00404641	0.0775807	0.00404641	0.0775807	255.674	297.524	154.234	201.744
ENSCSAG00000003436	ANO4	anoctamin 4	140.432	0.448822	0.163314	2.75045	0.00595139	0.0978037	0.00595139	0.0978037	166.619	179.217	120.149	95.743
ENSCSAG00000004758	PLEKHA7		115.299	0.447396	0.165543	2.70492	0.00683199	0.106206	0.00683199	0.106206	146.51	139.391	91.177	84.1171
ENSCSAG00000016289	TNFRSF10B	TNF receptor superfamily member 10b	82.5936	0.44737	0.170273	2.63069	0.00852111	NA	0.00852111	1	113.473	96.0511	61.3527	59.4974
ENSCSAG00000016180	MAP3K1	mitogen-activated protein kinase kinase kinase 1	1644.61	0.447013	0.128481	3.4793	0.000502732	0.0185112	0.000502732	0.0185112	1776.79	2117.81	1241.54	1442.3
ENSCSAG00000015179	USP19		272.08	0.446912	0.14894	3.00242	0.00267841	0.0582347	0.00267841	0.0582347	351.911	303.381	225.812	207.215
ENSCSAG00000011479	EFCAB11	EF-hand calcium binding domain 11	90.0162	0.445639	0.169394	2.63183	0.00849263	0.120748	0.00849263	0.120748	103.419	122.992	67.3176	66.3362
ENSCSAG00000018219	RTTN	rotatin	84.2764	0.445337	0.170642	2.60936	0.00907105	NA	0.00907105	1	93.3642	120.649	55.3879	67.704
ENSCSAG00000016994	WDR70	WD repeat domain 70	120.926	0.445049	0.165238	2.69619	0.00701367	0.107707	0.00701367	0.107707	155.128	144.077	99.6982	84.801
ENSCSAG00000019087	H2BC11	histone H2B type 1-J	469.029	0.444303	0.135881	3.27079	0.00107247	0.0314143	0.00107247	0.0314143	578.858	536.48	386.011	374.766
ENSCSAG00000002113	RSRC2		132.453	0.44419	0.163378	2.7211	0.00650651	0.103434	0.00650651	0.103434	175.237	151.105	102.255	101.214
ENSCSAG00000002403	ZNF202	zinc finger protein 202	50.7714	0.443961	0.17127	2.59437	0.00947632	NA	0.00947632	1	60.3276	73.7953	34.0848	34.8778
ENSCSAG00000001510	CDC14A	cell division cycle 14A	79.0413	0.44288	0.171222	2.58629	0.00970152	NA	0.00970152	1	83.3095	118.307	53.6836	60.8652
ENSCSAG00000015388	POC5		42.9093	0.442327	0.169898	2.60923	0.00907473	NA	0.00907473	1	61.764	53.8823	27.2679	28.7229
ENSCSAG00000012797	FNDC3B	fibronectin type III domain containing 3B	566.059	0.44095	0.138338	3.18761	0.00143452	0.0381353	0.00143452	0.0381353	597.531	748.495	449.068	469.141
ENSCSAG00000008910	PPL	periplakin	257.157	0.440863	0.151058	2.92029	0.00349705	0.0697976	0.00349705	0.0697976	313.129	305.723	225.812	183.963
ENSCSAG00000015420	HMGCR	3-hydroxy-3-methylglutaryl-CoA reductase	195.848	0.440837	0.157292	2.8027	0.00506761	0.0880845	0.00506761	0.0880845	224.074	251.841	137.191	170.286
ENSCSAG00000012022	GMPS	guanine monophosphate synthase	583.441	0.440241	0.132494	3.32311	0.000890197	0.0281578	0.000890197	0.0281578	665.04	716.869	460.145	491.709
ENSCSAG00000015968	DHX30	DExH-box helicase 30	272.874	0.440011	0.149819	2.93888	0.00329397	0.0672289	0.00329397	0.0672289	349.038	306.895	235.185	200.376
ENSCSAG00000009066	ADAMTS1	ADAM metallopeptidase with thrombospondin type 1 motif 1	195.645	0.439345	0.155745	2.82215	0.00477022	0.0850613	0.00477022	0.0850613	222.638	250.67	163.607	145.666
ENSCSAG00000011605	SNX5		738.777	0.438523	0.127963	3.42746	0.00060925	0.0211798	0.00060925	0.0211798	847.459	896.086	618.64	592.923
ENSCSAG00000010951	ITPR1	inositol 1,4,5-trisphosphate receptor type 1	95.7157	0.438391	0.168715	2.60117	0.00929066	0.129191	0.00929066	0.129191	130.71	108.936	70.726	72.4911
ENSCSAG00000014887	VCAN	versican	7868.07	0.437585	0.124929	3.50279	0.000460406	0.0177925	0.000460406	0.0177925	8228.97	10306.7	6149.76	6786.81
ENSCSAG00000007501	ITGB2		89.0078	0.4373	0.169517	2.58216	0.00981852	0.13469	0.00981852	0.13469	120.655	103.079	63.9091	68.3879
ENSCSAG00000012253	TCERG1	transcription elongation regulator 1	237.668	0.437039	0.15549	2.81127	0.0049347	0.0864872	0.0049347	0.0864872	301.638	274.097	160.199	214.738
ENSCSAG00000015405	ATF3		36.9211	0.437008	0.167351	2.62318	0.0087113	NA	0.0087113	1	54.5821	46.8542	26.4158	19.8325
ENSCSAG00000011581		forkhead box P1	275.632	0.436505	0.149359	2.9227	0.00347007	0.0694783	0.00347007	0.0694783	308.82	352.578	204.509	236.622
ENSCSAG00000012752	TPX2	TPX2 microtubule nucleation factor	557.742	0.436402	0.133829	3.26155	0.00110806	0.0320124	0.00110806	0.0320124	633.44	686.414	475.484	435.631
ENSCSAG00000001108	SNIP1		77.0863	0.435961	0.170752	2.5549	0.0106219	NA	0.0106219	1	91.9278	103.079	57.9442	55.3942
ENSCSAG00000002178	POLD1	transcription factor Spi-B	355.519	0.435604	0.14669	2.97134	0.00296508	0.0628503	0.00296508	0.0628503	463.948	386.547	311.024	260.558
ENSCSAG00000012502	MLLT10	protein AF-10	200.27	0.435478	0.158149	2.75357	0.00589499	0.097524	0.00589499	0.097524	206.838	278.782	153.382	162.079
ENSCSAG00000003984	TBCK	TBC1 domain containing kinase	213.238	0.433502	0.156835	2.76439	0.00570287	0.0952033	0.00570287	0.0952033	261.42	255.355	144.008	192.17
ENSCSAG00000010665	WDR43		593.948	0.43323	0.131269	3.30082	0.000964011	0.0294652	0.000964011	0.0294652	679.404	722.726	484.005	489.657
ENSCSAG00000018289	ASL	argininosuccinate lyase	1897.18	0.432889	0.137987	3.13762	0.00170327	0.0434541	0.00170327	0.0434541	2571.11	1930.39	1376.18	1711.06
ENSCSAG00000009459	SLC24A2	solute carrier family 24 member 2	159.105	0.431112	0.161246	2.67381	0.00749941	0.112438	0.00749941	0.112438	169.492	217.872	121.853	127.201
ENSCSAG00000006059	LHX1	LIM homeobox 1	525.625	0.430547	0.139059	3.09626	0.00195976	0.0475074	0.00195976	0.0475074	557.312	688.756	413.279	443.153
ENSCSAG00000016742	PRPF6		389.175	0.430129	0.151603	2.83931	0.00452111	0.0833967	0.00452111	0.0833967	530.021	404.117	354.482	268.08
ENSCSAG00000009649	ITPR3	inositol 1,4,5-trisphosphate receptor type 3	520.393	0.4295	0.136861	3.1392	0.00169412	0.0433956	0.00169412	0.0433956	667.913	564.593	417.539	431.527
ENSCSAG00000006508	INCENP		241.469	0.429394	0.15313	2.80603	0.00501562	0.0874211	0.00501562	0.0874211	293.02	286.982	215.587	170.286
ENSCSAG00000015380	DTL	denticleless E3 ubiquitin protein ligase homolog	101.053	0.429346	0.167632	2.56234	0.010397	0.13742	0.010397	0.13742	119.219	131.192	75.8388	77.9622
ENSCSAG00000017953	USPL1		75.8365	0.42817	0.171047	2.50359	0.0122941	NA	0.0122941	1	87.6187	104.251	51.9794	59.4974
ENSCSAG00000008983	LRP5	LDL receptor related protein 5	424.062	0.428128	0.138016	3.10309	0.00191513	0.0472508	0.00191513	0.0472508	522.839	481.427	352.778	339.204
ENSCSAG00000008021	ALDH1L1	aldehyde dehydrogenase 1 family member L1	64.8433	0.427941	0.171652	2.49635	0.0125479	NA	0.0125479	1	86.1823	79.6521	47.7188	45.8199
ENSCSAG00000009297	CNTLN	centlein	203.272	0.427752	0.155394	2.75314	0.00590273	0.097524	0.00590273	0.097524	221.201	268.24	160.199	163.447
ENSCSAG00000006419	MYOF		721.996	0.427741	0.132696	3.22365	0.00126568	0.0354335	0.00126568	0.0354335	777.077	925.37	576.886	608.652
ENSCSAG00000004234	FAM13A	family with sequence similarity 13 member A	158.554	0.427685	0.160392	2.6686	0.00761681	0.113503	0.00761681	0.113503	211.147	174.532	122.705	125.834
ENSCSAG00000015750	LYPLAL1	lysophospholipase like 1	72.4024	0.427524	0.171762	2.48797	0.0128473	NA	0.0128473	1	74.6913	111.279	43.4582	60.1813
ENSCSAG00000010271	RBM39		394.637	0.427201	0.139184	3.07036	0.00213798	0.0495495	0.00213798	0.0495495	469.693	465.028	334.031	309.797
ENSCSAG00000008258	DHX16	DEAH-box helicase 16	129.956	0.426022	0.163399	2.60934	0.0090716	0.126423	0.0090716	0.126423	166.619	151.105	102.255	99.8463
ENSCSAG00000004885	ATRNL1		251.805	0.425627	0.156206	2.72445	0.0064409	0.102908	0.0064409	0.102908	252.801	353.749	186.615	214.054
ENSCSAG00000012296	SRSF7		293.231	0.425572	0.149585	2.84672	0.00441719	0.0826851	0.00441719	0.0826851	393.566	308.066	236.038	235.254
ENSCSAG00000013497	CAMKK1	calcium/calmodulin dependent protein kinase kinase 1	172.984	0.422943	0.157564	2.68606	0.00723003	0.109436	0.00723003	0.109436	211.147	206.158	144.008	130.621
ENSCSAG00000009697	NPM1	nucleophosmin 1	84.6801	0.422636	0.171011	2.47078	0.013482	NA	0.013482	1	99.1096	114.793	50.2751	74.5428
ENSCSAG00000013878	KDM6A	lysine demethylase 6A	385.319	0.421288	0.152342	2.76513	0.00569007	0.0952033	0.00569007	0.0952033	374.893	547.022	286.313	333.049
ENSCSAG00000009988	TTC28		245.43	0.420447	0.150947	2.78589	0.00533818	0.0912828	0.00533818	0.0912828	268.601	317.437	195.988	199.693
ENSCSAG00000015221	TENT2	terminal nucleotidyltransferase 2	285.137	0.420304	0.148357	2.83338	0.00460586	0.0843609	0.00460586	0.0843609	308.82	370.148	224.96	236.622
ENSCSAG00000010083			604.226	0.420174	0.131274	3.20137	0.00136777	0.0369825	0.00136777	0.0369825	692.331	727.411	512.977	484.186
ENSCSAG00000009036	HS3ST3A1	heparan sulfate-glucosamine 3-sulfotransferase 3A1	281.248	0.419556	0.146927	2.857	0.00427672	0.0807725	0.00427672	0.0807725	350.475	318.608	234.333	221.577
ENSCSAG00000005276	UPF1	UPF1 RNA helicase and ATPase	519.629	0.419512	0.141238	2.97147	0.00296382	0.0628503	0.00296382	0.0628503	695.204	535.309	429.469	418.534
ENSCSAG00000006562	PHLDB2		658.897	0.418867	0.132838	3.15343	0.00161366	0.0418426	0.00161366	0.0418426	721.059	828.147	521.498	564.884
ENSCSAG00000002948	DDX10		137.638	0.418313	0.163711	2.55686	0.0105621	0.138932	0.0105621	0.138932	183.856	152.276	98.846	115.575
ENSCSAG00000015639	TACC3	transforming acidic coiled-coil containing protein 3	239.951	0.416705	0.153151	2.72297	0.00646981	0.10311	0.00646981	0.10311	304.511	269.411	212.178	173.705
ENSCSAG00000004926	PLXNB2	plexin B2	958.82	0.415655	0.127365	3.26416	0.0010979	0.0318643	0.0010979	0.0318643	1164.9	1079.99	843.6	746.796
ENSCSAG00000012567	TCP1	t-complex 1	1154.7	0.415363	0.123425	3.36552	0.000763989	0.0251758	0.000763989	0.0251758	1281.24	1416.17	947.559	973.843
ENSCSAG00000007784	ACSL3	acyl-CoA synthetase long chain family member 3	690.889	0.4147	0.140556	2.95039	0.00317375	0.0656219	0.00317375	0.0656219	761.277	870.316	489.117	642.846
ENSCSAG00000003170	TLL1	tolloid like 1	626.625	0.413903	0.134795	3.07077	0.00213507	0.0495495	0.00213507	0.0495495	695.204	777.779	478.892	554.626
ENSCSAG00000017268	EPHA7		496.812	0.413837	0.14697	2.81559	0.00486881	0.0857414	0.00486881	0.0857414	518.53	660.644	351.926	456.147
ENSCSAG00000002658			2224.69	0.413373	0.118037	3.50234	0.000461192	0.0177925	0.000461192	0.0177925	2601.27	2579.32	1953.06	1765.09
ENSCSAG00000016829	AHI1	Abelson helper integration site 1	86.678	0.413331	0.169773	2.43523	0.0148824	0.171793	0.0148824	0.171793	101.982	113.621	61.3527	69.7556
ENSCSAG00000011386	FXR2	FMR1 autosomal homolog 2	193.585	0.413216	0.155388	2.66112	0.00778818	0.114862	0.00778818	0.114862	241.31	222.557	162.755	147.718
ENSCSAG00000005129	VTI1A	vesicle transport through interaction with t-SNAREs 1A	103.694	0.412726	0.167454	2.46555	0.0136804	0.163932	0.0136804	0.163932	117.782	137.048	79.2473	80.6977
ENSCSAG00000013165	MYBBP1A	MYB binding protein 1a	167.576	0.411681	0.163705	2.51838	0.0117897	0.149786	0.0117897	0.149786	234.129	173.36	149.973	112.84
ENSCSAG00000011403	NRP1	neuropilin 1	351.335	0.410895	0.143466	2.86439	0.00417807	0.0793834	0.00417807	0.0793834	384.948	445.115	277.791	297.487
ENSCSAG00000000379	RHOB	ras homolog family member B	346.435	0.409961	0.154263	2.65971	0.00782082	0.114862	0.00782082	0.114862	453.893	373.662	329.771	228.415
ENSCSAG00000015121	FBXL17		83.1365	0.409756	0.17141	2.38963	0.0168654	NA	0.0168654	1	80.4368	128.849	56.24	67.0201
ENSCSAG00000007154	AQR	aquarius intron-binding spliceosomal factor	235.428	0.409569	0.152318	2.68915	0.00716343	0.10895	0.00716343	0.10895	259.983	301.038	178.945	201.744
ENSCSAG00000014164	MNAT1	MNAT1 component of CDK activating kinase	198.399	0.409357	0.154819	2.64471	0.0081761	0.117569	0.0081761	0.117569	228.383	245.984	151.678	167.55
ENSCSAG00000012434	ABCA7	phospholipid-transporting ATPase ABCA7	141.345	0.409292	0.164306	2.49432	0.0126198	0.155645	0.0126198	0.155645	186.728	156.961	125.262	96.4269
ENSCSAG00000011349	DCP1B	decapping mRNA 1B	80.4016	0.40881	0.170743	2.39623	0.0165648	NA	0.0165648	1	90.4914	110.107	65.6133	55.3942
ENSCSAG00000002534	RPS11	ribosomal protein S11	2003.93	0.408792	0.118941	3.43712	0.000587941	0.0206661	0.000587941	0.0206661	2344.16	2318.11	1588.35	1765.09
ENSCSAG00000016674	UCKL1	uridine-cytidine kinase 1 like 1	121.4	0.408701	0.164408	2.48732	0.0128708	0.157817	0.0128708	0.157817	146.51	148.762	94.5854	95.743
ENSCSAG00000001744	KMT5C	lysine methyltransferase 5C	93.6256	0.407961	0.169412	2.41196	0.0158671	0.176745	0.0158671	0.176745	126.401	105.422	78.3951	64.2846
ENSCSAG00000010278	FOSL2	FOS like 2, AP-1 transcription factor subunit	373.232	0.407498	0.149218	2.73245	0.00628661	0.10121	0.00628661	0.10121	448.148	436.915	352.778	255.087
ENSCSAG00000010349	FLYWCH1	FLYWCH-type zinc finger 1	106.88	0.407448	0.16699	2.44261	0.0145814	0.169996	0.0145814	0.169996	136.455	125.335	87.7685	77.9622
ENSCSAG00000000768	SLC25A33	solute carrier family 25 member 33	60.1676	0.407181	0.171649	2.37906	0.0173567	NA	0.0173567	1	81.8732	72.624	51.9794	34.1939
ENSCSAG00000017683	RMC1		104.598	0.406579	0.16785	2.42531	0.0152953	0.173199	0.0152953	0.173199	143.637	113.621	81.8036	79.3299
ENSCSAG00000006258	KANSL2		2616.97	0.405763	0.11493	3.53067	0.000414503	0.0164941	0.000414503	0.0164941	2970.42	3100.57	2172.91	2223.97
ENSCSAG00000008097	PLEKHA5	pleckstrin homology domain containing A5	494.598	0.405721	0.137436	2.95237	0.00315346	0.0654162	0.00315346	0.0654162	532.894	627.846	403.905	413.747
ENSCSAG00000005250	ELP4	elongator acetyltransferase complex subunit 4	111.322	0.405536	0.166763	2.43221	0.0150071	0.171793	0.0150071	0.171793	122.092	149.933	84.36	88.9042
ENSCSAG00000016067	CEP85L	centrosomal protein 85 like	105.131	0.404984	0.168974	2.39611	0.0165703	0.180843	0.0165703	0.180843	117.782	141.734	67.3176	93.6914
ENSCSAG00000008193	MCM5	minichromosome maintenance complex component 5	406.703	0.404366	0.143365	2.82199	0.00477268	0.0850613	0.00477268	0.0850613	525.712	433.401	354.482	313.216
ENSCSAG00000006427	GTF3C1	general transcription factor IIIC subunit 1	448.227	0.4043	0.138975	2.9103	0.00361086	0.0711711	0.00361086	0.0711711	567.367	486.112	378.342	361.088
ENSCSAG00000017779	NUFIP1	nuclear FMR1 interacting protein 1	41.5073	0.403983	0.167547	2.41449	0.0157573	NA	0.0157573	1	38.782	72.624	27.2679	27.3551
ENSCSAG00000005547		DnaJ heat shock protein family (Hsp40) member A2	75.6106	0.403968	0.171597	2.35886	0.0183311	NA	0.0183311	1	116.346	74.9667	53.6836	57.4458
ENSCSAG00000006809	HCFC1	host cell factor C1	579.589	0.40389	0.131387	3.07459	0.00210792	0.0492134	0.00210792	0.0492134	662.167	692.27	483.153	480.767
ENSCSAG00000014098	OSER1	oxidative stress responsive serine rich 1	178.008	0.403134	0.160509	2.51133	0.0120277	0.151291	0.0120277	0.151291	195.347	233.1	123.558	160.028
ENSCSAG00000003445	CEP295		277.719	0.402904	0.156198	2.57898	0.00990932	0.13469	0.00990932	0.13469	281.529	381.862	195.136	252.351
ENSCSAG00000013315	GNL3	G protein nucleolar 3	644.48	0.402597	0.133251	3.02222	0.00250926	0.0559018	0.00250926	0.0559018	778.513	728.582	574.33	496.496
ENSCSAG00000012887	IGDCC3		32.8008	0.402213	0.16467	2.4464	0.0144292	NA	0.0144292	1	37.3457	52.7109	17.8945	23.2519
ENSCSAG00000007423	PPAN	peter pan homolog	132.801	0.401451	0.163536	2.45642	0.0140327	0.166576	0.0140327	0.166576	152.255	168.675	112.48	97.7946
ENSCSAG00000005044	ZNF14		19.7214	0.401215	0.151138	2.68284	0.00730002	NA	0.00730002	1	27.2911	31.6266	11.0776	8.89042
ENSCSAG00000011985	COP1		456.752	0.400966	0.138627	2.89314	0.00381416	0.0740251	0.00381416	0.0740251	508.476	562.25	401.349	354.933
ENSCSAG00000009481	SH2D4B	SH2 domain containing 4B	12.4414	0.400836	0.131954	3.13763	0.00170322	NA	0.00170322	1	25.8547	16.399	3.40848	4.10327
ENSCSAG00000012008	C3orf33		40.6599	0.400333	0.169211	2.36838	0.0178663	NA	0.0178663	1	50.273	57.3964	25.5636	29.4068
ENSCSAG00000010172	MTSS1		266.142	0.399121	0.150243	2.65673	0.00789027	0.115056	0.00789027	0.115056	284.402	345.55	209.622	224.996
ENSCSAG00000015287	ZNF217	zinc finger protein 217	254.545	0.398502	0.152626	2.61114	0.00902406	0.126317	0.00902406	0.126317	262.856	340.864	204.509	209.951
ENSCSAG00000005675	AMBRA1	autophagy and beclin 1 regulator 1	204.581	0.398211	0.153958	2.58761	0.00966437	0.132927	0.00966437	0.132927	251.365	235.442	158.495	173.021
ENSCSAG00000000028	MT-ND4		266.563	0.398188	0.159863	2.49063	0.0127516	0.156724	0.0127516	0.156724	314.565	325.636	162.755	263.293
ENSCSAG00000003045	TENM3		304.576	0.397947	0.146063	2.72493	0.00643153	0.102908	0.00643153	0.102908	350.475	367.805	232.629	267.397
ENSCSAG00000001391	RABGGTB	Rab geranylgeranyltransferase subunit beta	1970.32	0.39734	0.118775	3.34565	0.0008209	0.0264991	0.0008209	0.0264991	2365.7	2199.8	1716.17	1599.59
ENSCSAG00000003313	FBXW7	F-box and WD repeat domain containing 7	209.895	0.397021	0.154454	2.57104	0.0101393	0.136352	0.0101393	0.136352	226.947	271.754	171.276	169.602
ENSCSAG00000010270	PARD3B	par-3 family cell polarity regulator beta	84.2728	0.3969	0.169883	2.33768	0.0194038	NA	0.0194038	1	99.1096	108.936	64.7612	64.2846
ENSCSAG00000015835	MARCHF7	membrane associated ring-CH-type finger 7	374.462	0.396844	0.149409	2.65587	0.00791044	0.115056	0.00791044	0.115056	392.129	493.14	269.27	343.307
ENSCSAG00000008375	SPTBN2		74.9639	0.395414	0.17102	2.31545	0.0205881	NA	0.0205881	1	97.6733	89.0229	60.5006	52.6587
ENSCSAG00000004025	PPME1		170.439	0.395202	0.158012	2.50188	0.0123536	0.153861	0.0123536	0.153861	201.092	206.158	129.522	144.982
ENSCSAG00000005024	TUBGCP6	tubulin gamma complex associated protein 6	80.5544	0.39361	0.170945	2.30651	0.0210824	NA	0.0210824	1	116.346	84.3375	61.3527	60.1813
ENSCSAG00000014824	NUP214		166.665	0.393359	0.161058	2.44241	0.0145895	0.169996	0.0145895	0.169996	170.928	228.414	131.227	136.092
ENSCSAG00000006104	AKAP8		74.2619	0.393142	0.171201	2.2999	0.0214541	NA	0.0214541	1	103.419	81.9948	56.24	55.3942
ENSCSAG00000017226	AKAP13		687.382	0.392995	0.129831	3.02735	0.00246707	0.0553516	0.00246707	0.0553516	759.841	838.69	578.59	572.406
ENSCSAG00000010419	PIM1	Pim-1 proto-oncogene, serine/threonine kinase	200.667	0.392754	0.159105	2.47055	0.0134905	0.161963	0.0134905	0.161963	234.129	244.813	188.319	135.408
ENSCSAG00000001063	S100PBP	S100P binding protein	124.18	0.392205	0.166231	2.35954	0.0182977	0.186941	0.0182977	0.186941	126.401	174.532	97.9939	97.7946
ENSCSAG00000006769	SLC3A2		617.299	0.392049	0.131158	2.98986	0.00279103	0.0600641	0.00279103	0.0600641	725.368	711.012	537.688	495.128
ENSCSAG00000004152	HELZ	helicase with zinc finger	300.503	0.391733	0.154633	2.53294	0.011311	0.145457	0.011311	0.145457	295.893	417.002	222.404	266.713
ENSCSAG00000003849	MRC2	mannose receptor C type 2	142.362	0.391645	0.166344	2.3582	0.0183636	0.186941	0.0183636	0.186941	189.601	155.79	133.783	90.272
ENSCSAG00000006555	KIF11	kinesin family member 11	331.992	0.39164	0.148714	2.63353	0.00845018	0.120687	0.00845018	0.120687	372.02	411.145	237.742	307.062
ENSCSAG00000009327	AKT3	AKT serine/threonine kinase 3	149.505	0.39156	0.161243	2.42907	0.0151376	0.172259	0.0151376	0.172259	163.746	194.445	120.149	119.679
ENSCSAG00000011612	TTC27	tetratricopeptide repeat domain 27	103.481	0.391475	0.168113	2.32867	0.0198764	0.190848	0.0198764	0.190848	112.037	140.563	75.8388	85.4848
ENSCSAG00000011889	MAGI1		77.6898	0.391203	0.171551	2.2801	0.0226018	NA	0.0226018	1	74.6913	119.478	57.0921	59.4974
ENSCSAG00000004119	LGR5		30.5765	0.390756	0.16428	2.38585	0.0170395	NA	0.0170395	1	40.2184	43.3401	19.5988	19.1486
ENSCSAG00000007792	SPECC1	sperm antigen with calponin homology and coiled-coil domains 1	371.912	0.390542	0.139822	2.79393	0.00520722	0.0892848	0.00520722	0.0892848	436.657	433.401	305.059	312.533
ENSCSAG00000017694	NPC1		130.708	0.390379	0.163131	2.39489	0.0166253	0.180919	0.0166253	0.180919	162.31	152.276	105.663	102.582
ENSCSAG00000004347			21.3672	0.389707	0.150528	2.61507	0.0089209	NA	0.0089209	1	20.1092	43.3401	11.0776	10.9421
ENSCSAG00000013905	WDR81	WD repeat domain 81	133.61	0.389614	0.164192	2.37569	0.0175162	0.18518	0.0175162	0.18518	179.546	142.905	110.776	101.214
ENSCSAG00000017577			159.586	0.389348	0.165646	2.35253	0.0186459	0.187259	0.0186459	0.187259	170.928	214.358	152.53	100.53
ENSCSAG00000008913	FAM83H	family with sequence similarity 83 member H	126.993	0.389303	0.167788	2.32421	0.0201145	0.190848	0.0201145	0.190848	188.165	121.821	105.663	92.3236
ENSCSAG00000005362	PCGF6	polycomb group ring finger 6	121.721	0.389265	0.167667	2.32084	0.0202954	0.191656	0.0202954	0.191656	127.837	168.675	80.9515	109.421
ENSCSAG00000017734	FNDC3A	fibronectin type III domain containing 3A	210.47	0.389077	0.155984	2.49455	0.0126118	0.155645	0.0126118	0.155645	218.328	281.125	168.72	173.705
ENSCSAG00000004971	ZNF43		857.58	0.389041	0.17167	2.27123	0.0231331	0.207617	0.0231331	0.207617	863.259	1289.66	560.696	716.705
ENSCSAG00000017333	RNGTT	RNA guanylyltransferase and 5'-phosphatase	149.238	0.388487	0.160613	2.42032	0.0155069	0.174267	0.0155069	0.174267	175.237	181.56	125.262	114.892
ENSCSAG00000015487	RAE1	ribonucleic acid export 1	202.984	0.388486	0.154182	2.52106	0.0117003	0.14925	0.0117003	0.14925	237.001	243.642	174.685	156.608
ENSCSAG00000011034	GABBR2	gamma-aminobutyric acid type B receptor subunit 2	38.8827	0.388282	0.166603	2.34002	0.0192829	NA	0.0192829	1	43.0911	60.9104	32.3806	19.1486
ENSCSAG00000017200	REV1	REV1 DNA directed polymerase	188.023	0.388183	0.156668	2.47815	0.0132067	0.159768	0.0132067	0.159768	205.401	241.299	147.417	157.976
ENSCSAG00000009182	KIF26B		42.5034	0.387027	0.168662	2.30114	0.021384	NA	0.021384	1	47.4003	64.4245	34.937	23.2519
ENSCSAG00000012850	CCDC66		92.3177	0.386605	0.169951	2.27429	0.0229487	0.206539	0.0229487	0.206539	100.546	126.506	62.2048	80.0138
ENSCSAG00000016183	ORC4	origin recognition complex subunit 4	239.376	0.386358	0.154411	2.50202	0.0123488	0.153861	0.0123488	0.153861	252.801	313.923	178.093	212.686
ENSCSAG00000003115	SYMPK	symplekin	156.815	0.386207	0.160026	2.41522	0.0157257	0.176244	0.0157257	0.176244	186.728	187.417	135.487	117.627
ENSCSAG00000007566	JARID2	jumonji and AT-rich interaction domain containing 2	177.292	0.386122	0.16071	2.40397	0.016218	0.179391	0.016218	0.179391	191.037	231.928	161.051	125.15
ENSCSAG00000002976	NPAT	protein NPAT	140.267	0.385919	0.165238	2.33504	0.0195413	0.190491	0.0195413	0.190491	153.692	185.074	93.7333	128.569
ENSCSAG00000015274	CEP57L1	centrosomal protein 57 like 1	32.5599	0.385056	0.163194	2.36301	0.0181272	NA	0.0181272	1	33.0365	56.225	17.0424	23.9358
ENSCSAG00000010283	PTPRS		1784.51	0.384904	0.117751	3.26906	0.00107904	0.0314612	0.00107904	0.0314612	2039.65	2075.64	1551.71	1471.02
ENSCSAG00000015908		splicing regulatory glutamic acid and lysine rich protein 1	287.543	0.384071	0.146433	2.62342	0.00870531	0.122809	0.00870531	0.122809	330.365	344.378	225.812	249.616
ENSCSAG00000012136	FOS	Fos proto-oncogene, AP-1 transcription factor subunit	8.27343	0.383994	0.114196	3.40835	0.000653561	NA	0.000653561	1	18.6728	12.8849	0.852121	0.683879
ENSCSAG00000010894	STAG1	stromal antigen 1	297.305	0.383973	0.147125	2.61014	0.00905051	0.126408	0.00905051	0.126408	328.929	368.977	230.073	261.242
ENSCSAG00000007255	THBS1	thrombospondin 1	2924.35	0.383958	0.116437	3.29775	0.000974635	0.0296467	0.000974635	0.0296467	3264.87	3473.07	2576.81	2382.63
ENSCSAG00000016722	PARP8	poly(ADP-ribose) polymerase family member 8	105.897	0.383581	0.168208	2.28008	0.0226027	0.205117	0.0226027	0.205117	114.91	142.905	74.1345	91.6397
ENSCSAG00000002057	DDX55	DEAD-box helicase 55	67.0382	0.382704	0.171537	2.23366	0.0255051	NA	0.0255051	1	87.6187	79.6521	50.2751	50.607
ENSCSAG00000014621	ADGRG2		105.619	0.382127	0.167646	2.27956	0.0226337	0.205117	0.0226337	0.205117	120.655	135.877	74.9867	90.9559
ENSCSAG00000000154	LRRC8D	leucine rich repeat containing 8 VRAC subunit D	219.628	0.382087	0.158196	2.4149	0.0157396	0.176244	0.0157396	0.176244	232.692	289.325	153.382	203.112
ENSCSAG00000000214	H2AC21	histone cluster 2 H2A family member b	207.214	0.381959	0.155211	2.46198	0.0138173	0.16526	0.0138173	0.16526	261.42	229.585	155.938	181.912
ENSCSAG00000005822	NR4A1	nuclear receptor subfamily 4 group A member 1	12.3652	0.38123	0.132654	2.95864	0.00309003	NA	0.00309003	1	18.6728	22.2557	5.11273	3.41939
ENSCSAG00000015889	TANC1	tetratricopeptide repeat, ankyrin repeat and coiled-coil containing 1	228.582	0.380813	0.152582	2.49634	0.0125482	0.155366	0.0125482	0.155366	245.62	292.839	189.171	186.699
ENSCSAG00000013275	SMAD3	SMAD family member 3	257.891	0.380388	0.148112	2.56945	0.0101859	0.136352	0.0101859	0.136352	308.82	296.353	216.439	209.951
ENSCSAG00000010096	ZNF200	zinc finger protein 200	116.471	0.380388	0.166843	2.28322	0.0224174	0.204079	0.0224174	0.204079	156.564	125.335	100.55	83.4332
ENSCSAG00000016874	TNKS	tankyrase	76.4116	0.380345	0.171102	2.22432	0.026127	NA	0.026127	1	83.3095	105.422	62.2048	54.7103
ENSCSAG00000004049	NFKB1	nuclear factor kappa B subunit 1	114.687	0.380155	0.165885	2.29409	0.0217854	0.200344	0.0217854	0.200344	147.946	128.849	93.7333	88.2203
ENSCSAG00000004893	FAM160B1	family with sequence similarity 160 member B1	171.617	0.379357	0.162483	2.33431	0.0195794	0.190491	0.0195794	0.190491	188.165	222.557	115.036	160.711
ENSCSAG00000011791	LTBP1		82.0458	0.379252	0.170429	2.22833	0.0258586	NA	0.0258586	1	101.982	99.5651	69.8739	56.7619
ENSCSAG00000000945	SRRM1		119.781	0.379202	0.166376	2.2791	0.0226611	0.205117	0.0226611	0.205117	124.964	163.99	90.3248	99.8463
ENSCSAG00000015843	BAZ2B	bromodomain adjacent to zinc finger domain 2B	276.295	0.379197	0.149041	2.54454	0.0109421	0.14245	0.0109421	0.14245	294.456	353.749	222.404	234.57
ENSCSAG00000016489	CHD8	chromodomain helicase DNA binding protein 8	680.393	0.378397	0.134429	2.81494	0.0048786	0.0857414	0.0048786	0.0857414	735.422	843.375	530.019	612.755
ENSCSAG00000017794		pentatricopeptide repeat-containing protein 1, mitochondrial	160.599	0.378362	0.159153	2.37913	0.0173536	0.18496	0.0173536	0.18496	195.347	186.245	136.339	124.466
ENSCSAG00000010069	ARID4B	AT-rich interaction domain 4B	359.402	0.378268	0.141792	2.66827	0.00762425	0.113503	0.00762425	0.113503	395.002	442.772	298.242	301.59
ENSCSAG00000017899	STARD13	StAR related lipid transfer domain containing 13	116.094	0.378253	0.16566	2.28519	0.0223018	0.203612	0.0223018	0.203612	136.455	142.905	98.846	86.1687
ENSCSAG00000000006	ND1	NADH dehydrogenase subunit 1	31.9699	0.377822	0.161832	2.33824	0.0193746	NA	0.0193746	1	33.0365	55.0537	14.4861	25.3035
ENSCSAG00000000748	PHF13	PHD finger protein 13	88.9937	0.377691	0.169407	2.23127	0.0256632	0.22048	0.0256632	0.22048	103.419	113.621	73.2824	65.6524
ENSCSAG00000004360	GRIP1		91.1999	0.376598	0.169108	2.22769	0.0259011	0.220914	0.0259011	0.220914	106.291	115.964	67.3176	75.2267
ENSCSAG00000015026	ANLN	anillin actin binding protein	260.868	0.376289	0.149715	2.51424	0.011929	0.150782	0.011929	0.150782	285.838	325.636	227.516	204.48
ENSCSAG00000015957			322.165	0.375877	0.158093	2.37704	0.0174524	0.18496	0.0174524	0.18496	301.638	461.514	230.073	295.436
ENSCSAG00000002082	KHDC4	KH domain containing 4, pre-mRNA splicing factor	484.859	0.375711	0.138807	2.70762	0.00677669	0.105606	0.00677669	0.105606	616.203	511.882	396.236	415.114
ENSCSAG00000016773	HMGCS1	3-hydroxy-3-methylglutaryl-CoA synthase 1	208.68	0.375674	0.154402	2.43345	0.0149556	0.171793	0.0149556	0.171793	228.383	263.555	163.607	179.176
ENSCSAG00000005230	METTL15	methyltransferase like 15	45.7689	0.375574	0.169348	2.21728	0.0266039	NA	0.0266039	1	50.273	69.1099	24.7115	38.9811
ENSCSAG00000010252	SLC4A1AP	solute carrier family 4 member 1 adaptor protein	156.351	0.375333	0.15977	2.35104	0.0187209	0.187298	0.0187209	0.187298	191.037	180.389	132.931	121.047
ENSCSAG00000001002	PPP1R8	protein phosphatase 1 regulatory subunit 8	415.365	0.375248	0.139365	2.69294	0.00708249	0.108239	0.00708249	0.108239	452.457	513.053	341.701	354.249
ENSCSAG00000004097	TANGO6	transport and golgi organization 6 homolog	176.045	0.375063	0.156947	2.39132	0.0167879	0.181568	0.0167879	0.181568	212.583	203.816	148.269	139.511
ENSCSAG00000012989	TNC	tenascin C	39.7993	0.374303	0.169049	2.21708	0.0266178	NA	0.0266178	1	48.8366	55.0537	27.2679	28.039
ENSCSAG00000012767	PLD1	phospholipase D1	142.653	0.374074	0.162979	2.29645	0.02165	0.199679	0.02165	0.199679	155.128	185.074	124.41	106.001
ENSCSAG00000002897	LIG1	DNA ligase 1	96.0248	0.374052	0.169057	2.2154	0.0267327	0.223432	0.0267327	0.223432	132.146	101.908	74.1345	75.9105
ENSCSAG00000017842	FOXO1	forkhead box O1	42.4781	0.373895	0.169881	2.20464	0.0274796	NA	0.0274796	1	57.4549	52.7109	28.9721	30.7745
ENSCSAG00000009233	EIF4A2		10927.2	0.373655	0.112489	3.32175	0.000894535	0.0281578	0.000894535	0.0281578	11950.6	13103.9	9213.98	9440.26
ENSCSAG00000005940	TBX2		169.931	0.373433	0.159643	2.34152	0.0192056	0.18898	0.0192056	0.18898	218.328	185.074	149.121	127.201
ENSCSAG00000019082	H2AC14	histone H2A type 1-J	217.384	0.373152	0.152625	2.44625	0.0144349	0.169443	0.0144349	0.169443	254.238	256.527	189.171	169.602
ENSCSAG00000010812	LMCD1		74.5724	0.372395	0.171335	2.1769	0.0294877	NA	0.0294877	1	106.291	78.4807	55.3879	58.1297
ENSCSAG00000017206	CDH6	cadherin 6	5667.91	0.371879	0.117384	3.16813	0.00153421	0.0401113	0.00153421	0.0401113	6117.51	6894.59	4612.53	5047.02
ENSCSAG00000002703	SIK3	SIK family kinase 3	164.439	0.371382	0.159764	2.32514	0.0200647	0.190848	0.0200647	0.190848	175.237	214.358	135.487	132.672
ENSCSAG00000017833	NAA16	N-alpha-acetyltransferase 16, NatA auxiliary subunit	87.3339	0.371367	0.170147	2.18361	0.0289909	0.232256	0.0289909	0.232256	112.037	101.908	58.7964	76.5944
ENSCSAG00000011846	MED12L		128.345	0.371122	0.164036	2.26294	0.0236391	0.209955	0.0236391	0.209955	146.51	160.476	96.2897	110.104
ENSCSAG00000013205			1717.63	0.3708	0.119661	3.09901	0.00194171	0.0472508	0.00194171	0.0472508	1921.87	2022.93	1524.44	1401.27
ENSCSAG00000014051	TRA2A	transformer 2 alpha homolog	225.323	0.370137	0.151427	2.44528	0.0144739	0.169586	0.0144739	0.169586	268.601	260.041	179.798	192.854
ENSCSAG00000009347	FAF2	Fas associated factor family member 2	174.405	0.368516	0.15893	2.3189	0.0204006	0.19179	0.0204006	0.19179	192.474	220.215	130.375	154.557
ENSCSAG00000008454	ETS2		253.439	0.368348	0.149071	2.47221	0.0134281	0.161803	0.0134281	0.161803	311.693	281.125	209.622	211.319
ENSCSAG00000003414	SLC10A7		20.5136	0.368125	0.152931	2.42518	0.0153009	NA	0.0153009	1	28.7274	30.4552	11.9297	10.9421
ENSCSAG00000015301	MIS18BP1		196.472	0.368034	0.154981	2.37536	0.0175317	0.18518	0.0175317	0.18518	226.947	235.442	152.53	170.97
ENSCSAG00000010518	IFFO1	intermediate filament family orphan 1	61.5496	0.367913	0.171775	2.14595	0.0318773	NA	0.0318773	1	77.5641	76.138	52.8315	39.665
ENSCSAG00000010475	DPP9	dipeptidyl peptidase 9	206.969	0.367115	0.154948	2.37115	0.0177331	0.186013	0.0177331	0.186013	257.111	229.585	183.206	157.976
ENSCSAG00000001202	KIF2C	kinesin family member 2C	173.828	0.367045	0.157886	2.32657	0.0199883	0.190848	0.0199883	0.190848	211.147	199.13	151.678	133.356
ENSCSAG00000013648	ANKRD16	ankyrin repeat domain 16	37.1069	0.36701	0.167966	2.19087	0.0284613	NA	0.0284613	1	51.7094	45.6828	26.4158	24.6196
ENSCSAG00000013605	GOLGA1	golgin A1	459.581	0.366836	0.13723	2.67386	0.00749843	0.112438	0.00749843	0.112438	557.312	507.196	372.377	401.437
ENSCSAG00000003248	PDGFC	platelet derived growth factor C	357.258	0.366792	0.14503	2.5294	0.0114259	0.146105	0.0114259	0.146105	370.584	460.342	303.355	294.752
ENSCSAG00000009158	NFIB	nuclear factor 1 B-type	75.6955	0.36633	0.17156	2.13503	0.0327589	NA	0.0327589	1	73.2549	113.621	57.0921	58.8136
ENSCSAG00000007915	PCSK5		56.6083	0.365929	0.171731	2.13245	0.0329696	NA	0.0329696	1	71.8186	70.2813	39.1976	45.136
ENSCSAG00000005843	PASK	PAS domain containing serine/threonine kinase	77.4795	0.364924	0.170661	2.14041	0.0323216	NA	0.0323216	1	93.3642	96.0511	63.057	57.4458
ENSCSAG00000011446	RIN2	Ras and Rab interactor 2	148.424	0.364134	0.161094	2.26207	0.0236934	0.209955	0.0236934	0.209955	188.165	163.99	118.445	123.098
ENSCSAG00000008442	CAMSAP3	calmodulin regulated spectrin associated protein family member 3	47.6291	0.36396	0.170612	2.13366	0.0328709	NA	0.0328709	1	57.4549	64.4245	28.9721	39.665
ENSCSAG00000007965	PCNX3	pecanex 3	505.944	0.363741	0.133984	2.71545	0.00661861	0.104429	0.00661861	0.104429	574.549	592.705	437.99	418.534
ENSCSAG00000017037	REPS1	RALBP1 associated Eps domain containing 1	132.653	0.363642	0.16439	2.21214	0.0269573	0.223748	0.0269573	0.223748	139.328	176.874	102.255	112.156
ENSCSAG00000006565	IDE		346.041	0.36351	0.14626	2.48544	0.0129393	0.158044	0.0129393	0.158044	372.02	433.401	264.158	314.584
ENSCSAG00000014344	POLA1	DNA polymerase alpha 1, catalytic subunit	308.158	0.363069	0.153246	2.36899	0.0178367	0.186013	0.0178367	0.186013	297.329	424.03	244.559	266.713
ENSCSAG00000019078	H1-5	H1.5 linker histone, cluster member	927.735	0.363004	0.141272	2.57041	0.0101578	0.136352	0.0101578	0.136352	1233.84	917.17	855.53	704.395
ENSCSAG00000001900	CNOT3	CCR4-NOT transcription complex subunit 3	144.431	0.363	0.161581	2.24742	0.0246132	0.215093	0.0246132	0.215093	159.437	182.731	119.297	116.259
ENSCSAG00000010524	FBN1		100.597	0.362511	0.168397	2.15528	0.0311403	0.240438	0.0311403	0.240438	120.655	121.821	89.4727	70.4395
ENSCSAG00000007613	UBQLN1		539.358	0.362291	0.141379	2.56259	0.0103894	0.13742	0.0103894	0.13742	600.403	650.102	395.384	511.541
ENSCSAG00000001375	SRSF11	serine and arginine rich splicing factor 11	426.705	0.36214	0.142391	2.54335	0.0109795	0.142643	0.0109795	0.142643	448.148	541.166	336.588	380.92
ENSCSAG00000009751			222.621	0.361868	0.155965	2.32004	0.0203385	0.191776	0.0203385	0.191776	231.256	291.667	167.868	199.693
ENSCSAG00000015273	MID1	midline 1	222.743	0.361834	0.152219	2.37762	0.0174249	0.18496	0.0174249	0.18496	245.62	275.268	180.65	189.434
ENSCSAG00000017230	CRACDL		69.8055	0.36176	0.17153	2.11286	0.0346126	NA	0.0346126	1	96.2369	76.138	56.24	50.607
ENSCSAG00000001028	PUM1	pumilio RNA binding family member 1	913.965	0.361548	0.127874	2.82754	0.00469065	0.0845519	0.00469065	0.0845519	983.915	1116.3	750.719	804.925
ENSCSAG00000013810	IRF1	interferon regulatory factor 1	54.2798	0.361091	0.171076	2.11086	0.034784	NA	0.034784	1	68.9458	69.1099	29.8242	49.2393
ENSCSAG00000012582	MED15		91.129	0.361	0.169253	2.13429	0.0328188	0.248565	0.0328188	0.248565	101.982	118.307	75.8388	68.3879
ENSCSAG00000009949	SAFB	scaffold attachment factor B	317.176	0.360774	0.148244	2.43504	0.0148903	0.171793	0.0148903	0.171793	376.329	361.948	296.538	233.887
ENSCSAG00000014401	RBM5	RNA binding motif protein 5	196.954	0.360605	0.155325	2.32337	0.0201595	0.190848	0.0201595	0.190848	245.62	216.701	169.572	155.924
ENSCSAG00000007693	DOCK10		75.6901	0.360586	0.171494	2.10191	0.0355614	NA	0.0355614	1	84.7459	101.908	47.7188	68.3879
ENSCSAG00000016060	PPP2R2A	protein phosphatase 2 regulatory subunit Balpha	130.934	0.360522	0.164825	2.18739	0.0287143	0.232139	0.0287143	0.232139	135.019	176.874	103.107	108.737
ENSCSAG00000004407	LEMD3	LEM domain containing 3	267.965	0.360279	0.150064	2.40123	0.0163402	0.179487	0.0163402	0.179487	280.092	344.378	225.812	221.577
ENSCSAG00000014870	POMT1	protein O-mannosyltransferase 1	91.0134	0.360185	0.16967	2.126	0.033503	0.251452	0.033503	0.251452	124.964	96.0511	73.2824	69.7556
ENSCSAG00000011571	GORAB	golgin, RAB6 interacting	50.7618	0.360093	0.171122	2.10671	0.0351431	NA	0.0351431	1	70.3822	58.5677	32.3806	41.7166
ENSCSAG00000013956	NUP42	nucleoporin 42	101.49	0.359755	0.167905	2.14311	0.0321039	0.245316	0.0321039	0.245316	117.782	126.506	74.1345	87.5365
ENSCSAG00000017424	CEP72		83.4934	0.359692	0.170347	2.11482	0.034445	NA	0.034445	1	112.037	91.3656	69.0218	61.5491
ENSCSAG00000007690	ITPR2	inositol 1,4,5-trisphosphate receptor type 2	237.261	0.35949	0.152514	2.35742	0.0184025	0.186941	0.0184025	0.186941	248.492	305.723	195.136	199.693
ENSCSAG00000017574	INTS1	integrator complex subunit 1	682.424	0.358937	0.143594	2.5007	0.012395	0.154072	0.012395	0.154072	923.587	659.472	605.006	541.632
ENSCSAG00000015643	LAMA4	laminin subunit alpha 4	183.515	0.358635	0.155914	2.30115	0.0213831	0.197505	0.0213831	0.197505	214.019	216.701	147.417	155.924
ENSCSAG00000015902	RGS12		205.521	0.358614	0.153868	2.3322	0.0196899	0.19057	0.0196899	0.19057	252.801	228.414	174.685	166.183
ENSCSAG00000002794	ZW10		112.389	0.358608	0.167489	2.14082	0.0322883	0.245834	0.0322883	0.245834	123.528	146.419	78.3951	101.214
ENSCSAG00000013879	SPTBN1	spectrin beta, non-erythrocytic 1	972.592	0.358357	0.124736	2.87333	0.00406166	0.0776379	0.00406166	0.0776379	1097.39	1131.53	864.051	797.403
ENSCSAG00000007163	KLF11	Kruppel like factor 11	165.069	0.358185	0.160829	2.22715	0.0259374	0.220914	0.0259374	0.220914	169.492	220.215	130.375	140.195
ENSCSAG00000017909	PDS5B	PDS5 cohesin associated factor B	164.529	0.358071	0.16127	2.2202	0.026405	0.222456	0.026405	0.222456	179.546	209.672	118.445	150.453
ENSCSAG00000013887	CDCA7L		274.453	0.357915	0.15149	2.36328	0.0181139	0.186941	0.0181139	0.186941	340.42	301.038	201.953	254.403
ENSCSAG00000005681	ZNF408	prothrombin	60.4967	0.357672	0.171334	2.09535	0.0361401	NA	0.0361401	1	90.4914	62.0818	54.5357	34.8778
ENSCSAG00000009828	ZFAT	zinc finger and AT-hook domain containing	86.997	0.357511	0.169742	2.10746	0.0350775	0.257487	0.0350775	0.257487	109.164	101.908	63.057	73.8589
ENSCSAG00000011451	NRDE2	NRDE-2, necessary for RNA interference, domain containing	77.1625	0.356984	0.170734	2.093	0.0363493	NA	0.0363493	1	91.9278	96.0511	63.9091	56.7619
ENSCSAG00000015454	URGCP		86.2152	0.356809	0.170328	2.09849	0.0358617	0.260801	0.0358617	0.260801	113.473	96.0511	75.8388	59.4974
ENSCSAG00000010860	SAMD12	sterile alpha motif domain containing 12	80.128	0.356777	0.171243	2.08518	0.0370533	NA	0.0370533	1	83.3095	112.45	70.726	54.0264
ENSCSAG00000011977	ATXN7		66.7022	0.356751	0.171736	2.08181	0.0373594	NA	0.0373594	1	87.6187	77.3094	58.7964	43.0844
ENSCSAG00000002086	HIP1R	huntingtin interacting protein 1 related	397.554	0.35594	0.150921	2.36007	0.0182716	0.186941	0.0182716	0.186941	514.221	412.317	382.602	281.074
ENSCSAG00000014264	MICAL3		399.118	0.355845	0.14222	2.50239	0.0123356	0.153861	0.0123356	0.153861	416.548	506.025	340.848	333.049
ENSCSAG00000013876	SYNE2	spectrin repeat containing nuclear envelope protein 2	4628.96	0.355332	0.115852	3.06718	0.00216086	0.0498968	0.00216086	0.0498968	4974.15	5586.19	3913.79	4041.72
ENSCSAG00000008347	TRPM3		442.844	0.35495	0.142531	2.49049	0.0127569	0.156724	0.0127569	0.156724	449.584	573.964	372.377	375.449
ENSCSAG00000017246	ALPK3		10.3944	0.35484	0.124741	2.94995	0.0031783	NA	0.0031783	1	21.5456	14.0563	2.55636	3.41939
ENSCSAG00000001600	MOV10	Mov10 RISC complex RNA helicase	181.056	0.35478	0.156582	2.2672	0.023378	0.208328	0.023378	0.208328	211.147	213.186	157.642	142.247
ENSCSAG00000014903		SLIT-ROBO Rho GTPase activating protein 2	137.939	0.354414	0.163465	2.17054	0.0299661	0.236359	0.0299661	0.236359	172.365	154.619	123.558	101.214
ENSCSAG00000017533	ABCC4	ATP binding cassette subfamily C member 4	420.213	0.353381	0.137622	2.56846	0.0102151	0.136352	0.0102151	0.136352	494.112	474.398	348.518	363.823
ENSCSAG00000004350	VAC14	VAC14 component of PIKFYVE complex	426.589	0.353009	0.149071	2.36934	0.0178198	0.186013	0.0178198	0.186013	586.04	406.46	356.187	357.669
ENSCSAG00000014700	SCAPER		80.922	0.353008	0.170321	2.07369	0.0381083	NA	0.0381083	1	91.9278	104.251	63.9091	63.6007
ENSCSAG00000002837	ACACB		96.9995	0.352999	0.168107	2.10179	0.0355721	0.259843	0.0355721	0.259843	119.219	113.621	79.2473	75.9105
ENSCSAG00000018095	PSPC1		115.715	0.352933	0.16598	2.12759	0.0333713	0.251037	0.0333713	0.251037	145.074	131.192	86.0642	100.53
ENSCSAG00000002786	RARA	retinoic acid receptor alpha	201.112	0.352839	0.154796	2.28102	0.0225473	0.204967	0.0225473	0.204967	251.365	219.043	171.276	162.763
ENSCSAG00000007208	CDIN1	CDAN1 interacting nuclease 1	50.0275	0.352712	0.171073	2.06355	0.03906	NA	0.03906	1	54.5821	71.4526	39.1976	34.8778
ENSCSAG00000016537	BMP1	bone morphogenetic protein 1	146.153	0.352647	0.161432	2.18647	0.0287809	0.232256	0.0287809	0.232256	180.983	163.99	126.114	113.524
ENSCSAG00000006253	ZBTB11	zinc finger and BTB domain containing 11	120.611	0.352363	0.166105	2.12176	0.0338575	0.253211	0.0338575	0.253211	145.074	142.905	84.36	110.104
ENSCSAG00000005557	HLF	HLF transcription factor, PAR bZIP family member	15.9097	0.352248	0.142861	2.50602	0.0122098	NA	0.0122098	1	25.8547	22.2557	9.37333	6.15491
ENSCSAG00000012871	ERC2		38.3446	0.352123	0.165637	2.1283	0.0333122	NA	0.0333122	1	33.0365	67.9385	26.4158	25.9874
ENSCSAG00000015144	UBR3		338.696	0.352005	0.146569	2.40169	0.0163196	0.179487	0.0163196	0.179487	363.402	421.688	259.897	309.797
ENSCSAG00000006894			487.764	0.351934	0.134519	2.61695	0.00887193	0.124739	0.00887193	0.124739	573.112	548.194	416.687	413.063
ENSCSAG00000019093	H2AC6	histone H2A type 1-C	626.333	0.351584	0.137313	2.56139	0.0104254	0.13742	0.0104254	0.13742	781.386	660.644	574.33	488.973
ENSCSAG00000016241	LOXL2	lysyl oxidase like 2	503.32	0.351385	0.136451	2.57598	0.00999566	0.134845	0.00999566	0.134845	578.858	578.649	458.441	397.334
ENSCSAG00000009140	WDR91	WD repeat domain 91	102.96	0.351215	0.167244	2.10116	0.0356267	0.259843	0.0356267	0.259843	122.092	124.164	80.0994	85.4848
ENSCSAG00000006593	MTA2		442.626	0.35111	0.138299	2.53967	0.0110956	0.142977	0.0110956	0.142977	544.385	475.57	375.785	374.766
ENSCSAG00000014699	CDCA7		62.9126	0.350183	0.171556	2.0424	0.0411114	NA	0.0411114	1	87.6187	70.2813	34.937	58.8136
ENSCSAG00000014523	ATF2	activating transcription factor 2	527.073	0.349975	0.146941	2.38157	0.017239	0.18496	0.017239	0.18496	557.312	664.158	373.229	513.593
ENSCSAG00000011790	TASP1	taspase 1	93.9539	0.34968	0.17003	2.05675	0.0397107	0.2759	0.0397107	0.2759	91.9278	134.706	76.6909	72.4911
ENSCSAG00000010550	NCAPD2	non-SMC condensin I complex subunit D2	1695.31	0.349646	0.117743	2.96978	0.0029801	0.0628503	0.0029801	0.0628503	1896.01	1966.7	1470.76	1447.77
ENSCSAG00000018465			135.74	0.3494	0.167042	2.09211	0.0364291	0.262813	0.0364291	0.262813	173.801	151.105	86.0642	131.989
ENSCSAG00000006066	AATF	apoptosis antagonizing transcription factor	421.605	0.3493	0.139103	2.51203	0.0120039	0.151291	0.0120039	0.151291	492.675	477.913	380.046	335.784
ENSCSAG00000007759	AP1S3	adaptor related protein complex 1 subunit sigma 3	31.3293	0.34928	0.16377	2.13573	0.0327017	NA	0.0327017	1	41.6548	42.1688	16.1903	25.3035
ENSCSAG00000016995	MCTP2	multiple C2 and transmembrane domain containing 2	71.9891	0.349113	0.17134	2.04073	0.0412773	NA	0.0412773	1	97.6733	78.4807	57.0921	54.7103
ENSCSAG00000010496	NOP58		501.657	0.348925	0.148288	2.35305	0.0186199	0.187259	0.0186199	0.187259	583.167	580.992	342.553	499.915
ENSCSAG00000005981	PPM1D	protein phosphatase, Mg2+/Mn2+ dependent 1D	868.981	0.348828	0.126163	2.76519	0.00568899	0.0952033	0.00568899	0.0952033	949.442	1036.65	746.458	743.376
ENSCSAG00000018141	TCF4	transcription factor 4	50.554	0.346746	0.171074	2.02779	0.0425812	NA	0.0425812	1	53.1457	73.7953	38.3454	36.9294
ENSCSAG00000005831	RNF40	ring finger protein 40	277.501	0.346348	0.149831	2.31296	0.0207246	0.193972	0.0207246	0.193972	324.62	318.608	258.193	208.583
ENSCSAG00000004622	GALNT18		358.859	0.346275	0.142559	2.4301	0.0150948	0.172081	0.0150948	0.172081	442.402	385.376	310.172	297.487
ENSCSAG00000017524	UGGT2	UDP-glucose glycoprotein glucosyltransferase 2	94.4051	0.345954	0.169352	2.04281	0.0410714	0.280322	0.0410714	0.280322	107.728	119.478	65.6133	84.801
ENSCSAG00000004660	ATE1		104.427	0.345938	0.168197	2.05659	0.0397257	0.2759	0.0397257	0.2759	109.164	140.563	78.3951	89.5881
ENSCSAG00000002376	KIRREL1	kirre like nephrin family adhesion molecule 1	534.042	0.345693	0.135386	2.55421	0.0106429	0.139127	0.0106429	0.139127	627.694	597.391	485.709	425.373
ENSCSAG00000002787	ZNF276	zinc finger protein 276	38.4328	0.345627	0.168599	2.05329	0.0400444	NA	0.0400444	1	47.4003	51.5396	28.12	26.6713
ENSCSAG00000005174	TMC6	transmembrane channel like 6	67.1095	0.345626	0.171735	2.01694	0.0437013	NA	0.0437013	1	96.2369	69.1099	54.5357	48.5554
ENSCSAG00000010954	DZIP1L	DAZ interacting zinc finger protein 1 like	74.9061	0.345531	0.170976	2.02329	0.0430428	NA	0.0430428	1	90.4914	91.3656	63.057	54.7103
ENSCSAG00000016417	HELZ2	helicase with zinc finger 2	46.7146	0.345402	0.170467	2.03183	0.0421709	NA	0.0421709	1	63.2003	55.0537	39.1976	29.4068
ENSCSAG00000008017	RACK1	receptor for activated C kinase 1	8817.04	0.345002	0.113524	3.03908	0.00237301	0.0536216	0.00237301	0.0536216	10419.4	9609.79	7353.8	7885.12
ENSCSAG00000004716	NUP85	nucleoporin 85	245.753	0.34462	0.151931	2.26915	0.0232594	0.20815	0.0232594	0.20815	304.511	267.069	189.171	222.261
ENSCSAG00000008197	ZNF7	zinc finger protein 7	140.56	0.344146	0.162645	2.11642	0.0343094	0.254866	0.0343094	0.254866	149.383	181.56	115.036	116.259
ENSCSAG00000016860	EHMT1		286.532	0.343514	0.146619	2.34369	0.0190939	0.188466	0.0190939	0.188466	316.002	345.55	251.376	233.203
ENSCSAG00000008412	SREBF1	sterol regulatory element binding transcription factor 1	644.788	0.343479	0.141647	2.42586	0.0152721	0.173199	0.0152721	0.173199	805.804	678.214	617.788	477.347
ENSCSAG00000012374	ARHGAP26	Rho GTPase activating protein 26	178.858	0.343054	0.15819	2.16924	0.0300647	0.236592	0.0300647	0.236592	188.165	229.585	153.382	144.298
ENSCSAG00000019080		histone H2A type 1	334.021	0.34254	0.151045	2.2694	0.0232442	0.20815	0.0232442	0.20815	449.584	325.636	294.834	266.029
ENSCSAG00000013230	ARID1B		345.483	0.342355	0.147169	2.32629	0.0200033	0.190848	0.0200033	0.190848	372.02	426.373	260.749	322.791
ENSCSAG00000018332	THOC2	THO complex 2	158.714	0.342236	0.160448	2.13326	0.0329032	0.248565	0.0329032	0.248565	169.492	202.644	125.262	137.46
ENSCSAG00000007429		eukaryotic translation elongation factor 1 epsilon 1	721.469	0.342208	0.143703	2.38147	0.0172437	0.18496	0.0172437	0.18496	851.768	811.749	503.604	718.756
ENSCSAG00000015568	VAV2	vav guanine nucleotide exchange factor 2	439.17	0.34211	0.139733	2.44934	0.0143117	0.169132	0.0143117	0.169132	544.385	465.028	386.863	360.404
ENSCSAG00000005405	ZNF423	zinc finger protein 423	27.6566	0.342009	0.160486	2.13407	0.0328373	NA	0.0328373	1	31.6002	43.3401	14.4861	21.2002
ENSCSAG00000008673	MROH1	maestro heat like repeat family member 1	157.316	0.341937	0.160446	2.13308	0.0329184	0.248565	0.0329184	0.248565	189.601	179.217	141.452	118.995
ENSCSAG00000016098	ACIN1	apoptotic chromatin condensation inducer 1	276.957	0.341785	0.146767	2.32974	0.01982	0.190848	0.01982	0.190848	316.002	323.294	242.854	225.68
ENSCSAG00000003586	GPATCH8	G-patch domain containing 8	352.073	0.341312	0.142481	2.39594	0.016578	0.180843	0.016578	0.180843	399.311	411.145	281.2	316.636
ENSCSAG00000001175	SLC2A1		85.5346	0.341285	0.169739	2.01284	0.0441315	NA	0.0441315	1	104.855	100.736	71.5782	64.9685
ENSCSAG00000001143	RLF	RLF zinc finger	278.859	0.341191	0.149054	2.28924	0.0220654	0.202037	0.0220654	0.202037	303.074	342.035	217.291	253.035
ENSCSAG00000013219	KIF20A	kinesin family member 20A	366.33	0.341138	0.144545	2.3606	0.0182455	0.186941	0.0182455	0.186941	440.966	404.117	280.348	339.888
ENSCSAG00000016589	L3MBTL3	L3MBTL histone methyl-lysine binding protein 3	54.5435	0.340281	0.171595	1.98419	0.0472349	NA	0.0472349	1	68.9458	66.7672	36.6412	45.8199
ENSCSAG00000006597		transportin 2	647.791	0.339891	0.131333	2.58869	0.00963407	0.132799	0.00963407	0.132799	771.332	708.669	577.738	533.425
ENSCSAG00000004177	CNOT2	CCR4-NOT transcription complex subunit 2	536.694	0.339858	0.136935	2.48203	0.0130636	0.158888	0.0130636	0.158888	570.24	659.472	432.877	484.186
ENSCSAG00000004432	EBF3		158.987	0.339676	0.162857	2.08536	0.0370365	0.266284	0.0370365	0.266284	168.055	206.158	113.332	148.402
ENSCSAG00000016332	SDE2	SDE2 telomere maintenance homolog	162.411	0.339184	0.160398	2.11581	0.0343607	0.254866	0.0343607	0.254866	205.401	175.703	123.558	144.982
ENSCSAG00000012037	TTLL5	tubulin tyrosine ligase like 5	113.48	0.338852	0.167884	2.01816	0.0435743	0.290222	0.0435743	0.290222	110.601	159.304	90.3248	93.6914
ENSCSAG00000006308	NLE1		84.9597	0.33786	0.170434	1.98584	0.0470508	NA	0.0470508	1	113.473	91.3656	74.1345	60.8652
ENSCSAG00000006985	ZNF746	zinc finger protein 746	44.8317	0.33776	0.168879	2.0071	0.044739	NA	0.044739	1	54.5821	59.7391	41.7539	23.2519
ENSCSAG00000009445	BRD2		357.663	0.337735	0.146725	2.3018	0.0213466	0.197505	0.0213466	0.197505	366.275	458	282.904	323.475
ENSCSAG00000012462	GULP1		473.492	0.336912	0.142832	2.35876	0.0183363	0.186941	0.0183363	0.186941	486.93	600.905	369.821	436.315
ENSCSAG00000006901			46.8795	0.336869	0.170079	1.98322	0.0473426	NA	0.0473426	1	67.5095	51.5396	28.12	40.3488
ENSCSAG00000012615	ASXL1		427.507	0.336548	0.138291	2.43398	0.0149339	0.171793	0.0149339	0.171793	469.693	509.539	351.926	378.869
ENSCSAG00000002290	PRKAB1	protein kinase AMP-activated non-catalytic subunit beta 1	81.2434	0.336119	0.170775	1.96856	0.0490035	NA	0.0490035	1	83.3095	112.45	65.6133	63.6007
ENSCSAG00000015330	CERS6	ceramide synthase 6	114.294	0.335935	0.16554	2.03067	0.0422885	0.285854	0.0422885	0.285854	137.892	132.363	91.177	95.743
ENSCSAG00000017675	CABLES1		88.8527	0.335929	0.169791	1.98023	0.0476779	0.301585	0.0476779	0.301585	99.1096	113.621	78.3951	64.2846
ENSCSAG00000017563	RBM26	RNA binding motif protein 26	187.21	0.33587	0.156054	2.1528	0.0313341	0.240438	0.0313341	0.240438	206.838	228.414	150.825	162.763
ENSCSAG00000007165	FGD3	FYVE, RhoGEF and PH domain containing 3	86.5157	0.335769	0.17012	1.97683	0.048061	0.302569	0.048061	0.302569	110.601	97.2224	76.6909	61.5491
ENSCSAG00000011618	FRMD4B	FERM domain containing 4B	678.121	0.335308	0.133238	2.51678	0.0118433	0.150165	0.0118433	0.150165	705.258	842.204	576.886	588.136
ENSCSAG00000008703	RUNX1	RUNX family transcription factor 1	435.269	0.33515	0.142412	2.3535	0.0185975	0.187259	0.0185975	0.187259	440.966	557.565	366.412	376.133
ENSCSAG00000001582	DDX20	DEAD-box helicase 20	116.539	0.334477	0.1655	2.02207	0.0431691	0.289306	0.0431691	0.289306	140.764	134.706	89.4727	101.214
ENSCSAG00000013173	MCM10	minichromosome maintenance 10 replication initiation factor	156.131	0.334235	0.161621	2.06929	0.0385192	0.271905	0.0385192	0.271905	169.492	195.616	143.156	116.259
ENSCSAG00000011716	WAC	WW domain containing adaptor with coiled-coil	388.654	0.334117	0.14611	2.2869	0.0222019	0.202993	0.0222019	0.202993	445.275	449.8	285.461	374.082
ENSCSAG00000010789	TADA1	transcriptional adaptor 1	110.608	0.334029	0.167414	1.99514	0.0460279	0.297162	0.0460279	0.297162	122.092	140.563	79.2473	100.53
ENSCSAG00000015117	FER	FER tyrosine kinase	85.9491	0.334005	0.169621	1.97032	0.048802	NA	0.048802	1	99.1096	106.593	69.0218	69.0717
ENSCSAG00000007344	FARS2	phenylalanyl-tRNA synthetase 2, mitochondrial	134.455	0.333769	0.163407	2.04426	0.0409279	0.279947	0.0409279	0.279947	155.128	160.476	121.001	101.214
ENSCSAG00000015342	F2RL1	F2R like trypsin receptor 1	1096.55	0.333758	0.123074	2.71209	0.0066861	0.105217	0.0066861	0.105217	1245.33	1245.15	910.917	984.785
ENSCSAG00000016772	NKTR		192.865	0.333061	0.156888	2.12319	0.0337382	0.252916	0.0337382	0.252916	199.656	248.327	159.347	164.131
ENSCSAG00000012765	ID1	DNA-binding protein inhibitor ID-1	657.459	0.332787	0.13161	2.52925	0.0114307	0.146105	0.0114307	0.146105	797.186	701.641	574.33	556.677
ENSCSAG00000015925	ACVR1	activin A receptor type 1	138.327	0.33278	0.163186	2.03947	0.0414034	0.282013	0.0414034	0.282013	146.51	178.046	109.071	119.679
ENSCSAG00000010414	KDM4B	lysine demethylase 4B	264.225	0.332623	0.151343	2.19943	0.0278476	0.226759	0.0278476	0.226759	331.802	278.782	241.15	205.164
ENSCSAG00000003266	BCL3		53.0017	0.332534	0.171148	1.94608	0.0516453	NA	0.0516453	1	77.5641	55.0537	34.937	44.4521
ENSCSAG00000007708	CUL3	cullin 3	278.404	0.332116	0.150466	2.20739	0.0272865	0.224794	0.0272865	0.224794	310.256	332.665	208.77	261.926
ENSCSAG00000004499	SRGAP1	SLIT-ROBO Rho GTPase activating protein 1	80.5469	0.3321	0.171408	1.93833	0.0525828	NA	0.0525828	1	77.5641	117.135	70.726	56.7619
ENSCSAG00000016522			184.113	0.331511	0.162199	2.04328	0.0410249	0.280307	0.0410249	0.280307	176.674	254.184	138.044	167.55
ENSCSAG00000014041		eukaryotic translation elongation factor 1 alpha 1	6996.61	0.331238	0.115615	2.86507	0.00416915	0.0793834	0.00416915	0.0793834	7720.5	8109.29	5708.36	6448.29
ENSCSAG00000009603	TRAPPC9		34.1692	0.331095	0.16596	1.99692	0.0458337	NA	0.0458337	1	44.5275	44.5115	19.5988	28.039
ENSCSAG00000007038	PRKG1		77.2464	0.330758	0.170755	1.93815	0.0526047	NA	0.0526047	1	86.1823	99.5651	63.057	60.1813
ENSCSAG00000007184			29.0069	0.330754	0.159136	2.08278	0.0372711	NA	0.0372711	1	24.4183	53.8823	17.8945	19.8325
ENSCSAG00000006536	EXOC6	exocyst complex component 6	118.454	0.330669	0.165557	1.99764	0.0457553	0.296014	0.0457553	0.296014	129.273	149.933	92.0291	102.582
ENSCSAG00000005686	CKAP5	cytoskeleton associated protein 5	755.792	0.330539	0.127605	2.59079	0.00957551	0.13228	0.00957551	0.13228	887.678	830.49	645.056	659.943
ENSCSAG00000002284	CIT		213.06	0.330536	0.152379	2.17012	0.0299978	0.236359	0.0299978	0.236359	242.747	249.498	181.502	178.492
ENSCSAG00000000746	ZBTB48	zinc finger and BTB domain containing 48	28.5786	0.330167	0.162743	2.03311	0.0420414	NA	0.0420414	1	35.9093	39.826	18.7467	19.8325
ENSCSAG00000001347	ROR1	receptor tyrosine kinase like orphan receptor 1	150.063	0.330155	0.163764	2.01566	0.0438354	0.291331	0.0438354	0.291331	149.383	202.644	114.184	134.04
ENSCSAG00000003437	ABCE1		113.733	0.33015	0.165562	1.99542	0.0459967	0.297162	0.0459967	0.297162	132.146	135.877	94.5854	92.3236
ENSCSAG00000002880	SART3	spliceosome associated factor 3, U4/U6 recycling protein	178.756	0.330146	0.157935	2.09212	0.0364278	0.262813	0.0364278	0.262813	214.019	201.473	162.755	136.776
ENSCSAG00000018190	PHLPP1		88.9465	0.330024	0.169357	1.9509	0.0510689	0.31554	0.0510689	0.31554	109.164	103.079	75.8388	67.704
ENSCSAG00000017359	ZNF292	zinc finger protein 292	227.371	0.329997	0.15118	2.18349	0.0289998	0.232256	0.0289998	0.232256	252.801	271.754	190.023	194.905
ENSCSAG00000001213	TOE1	target of EGR1, exonuclease	36.8659	0.329797	0.167498	1.97216	0.0485908	NA	0.0485908	1	51.7094	43.3401	23.0073	29.4068
ENSCSAG00000006487	SUN2	Sad1 and UNC84 domain containing 2	260.56	0.329354	0.155427	2.12095	0.0339257	0.25342	0.0339257	0.25342	340.42	263.555	245.411	192.854
ENSCSAG00000017463	ANKRD10	ankyrin repeat domain 10	151.48	0.329085	0.162596	2.02452	0.0429172	0.288256	0.0429172	0.288256	153.692	200.302	132.931	118.995
ENSCSAG00000007624	NUP153	nucleoporin 153	377.512	0.328953	0.149186	2.20484	0.0274654	0.225105	0.0274654	0.225105	364.838	503.682	305.059	336.468
ENSCSAG00000016986	SH3RF3		31.3899	0.328622	0.164322	2.00629	0.044825	NA	0.044825	1	47.4003	35.1406	20.4509	22.568
ENSCSAG00000005865	ROBO2		123.185	0.328219	0.16431	1.99836	0.0456776	0.296014	0.0456776	0.296014	139.328	149.933	98.846	104.633
ENSCSAG00000000902	ECE1	endothelin converting enzyme 1	139.314	0.327865	0.163522	2.00608	0.0448482	0.294494	0.0448482	0.294494	147.946	178.046	125.262	106.001
ENSCSAG00000017846	MCM7	minichromosome maintenance complex component 7	782.92	0.327773	0.135237	2.42441	0.0153331	0.173237	0.0153331	0.173237	982.478	802.378	718.338	628.484
ENSCSAG00000005450	GBF1	golgi brefeldin A resistant guanine nucleotide exchange factor 1	287.065	0.327369	0.146789	2.23123	0.025666	0.22048	0.025666	0.22048	350.475	309.238	240.298	248.248
ENSCSAG00000014072	HIF1A	hypoxia inducible factor 1 subunit alpha	1115.15	0.327271	0.133639	2.44893	0.0143282	0.169132	0.0143282	0.169132	1199.37	1340.03	846.156	1075.06
ENSCSAG00000010557	CHAF1A		220.432	0.327267	0.152143	2.15204	0.0313942	0.240473	0.0313942	0.240473	247.056	261.212	194.284	179.176
ENSCSAG00000002173	NES	nestin	86.7861	0.326679	0.171456	1.91003	0.05613	0.326711	0.05613	0.326711	114.91	94.8797	86.0642	51.2909
ENSCSAG00000003541	TMPO	thymopoietin	1075.57	0.326676	0.126655	2.57937	0.00989798	0.13469	0.00989798	0.13469	1176.39	1263.89	868.311	993.676
ENSCSAG00000002923	BTBD11		36.727	0.326662	0.167926	1.94779	0.0514402	NA	0.0514402	1	45.9639	48.0255	25.5636	27.3551
ENSCSAG00000004450	SEC31A	SEC31 homolog A, COPII coat complex component	345.986	0.326263	0.144045	2.26527	0.023496	0.209085	0.023496	0.209085	363.402	428.716	288.869	302.958
ENSCSAG00000009742	PLAA		143.632	0.326047	0.164238	1.98522	0.0471203	0.299688	0.0471203	0.299688	165.183	172.189	99.6982	137.46
ENSCSAG00000006916	PXDN	peroxidasin	517.719	0.326045	0.133258	2.4472	0.0143971	0.169443	0.0143971	0.169443	581.73	596.219	442.251	450.676
ENSCSAG00000014385	KIAA0586		138.237	0.325998	0.162474	2.00699	0.0447507	0.294494	0.0447507	0.294494	150.819	172.189	111.628	118.311
ENSCSAG00000012423	HSP90AB1	heat shock protein 90 alpha family class B member 1	3409.98	0.325738	0.115052	2.83135	0.00463513	0.0843609	0.00463513	0.0843609	3757.55	3940.44	3077.86	2864.08
ENSCSAG00000008553	EFR3B	EFR3 homolog B	84.4242	0.325338	0.170993	1.90598	0.0566529	NA	0.0566529	1	101.982	100.736	80.9515	54.0264
ENSCSAG00000005653	PHF21A		111.07	0.325144	0.166957	1.94753	0.0514709	0.315805	0.0514709	0.315805	119.219	142.905	84.36	97.7946
ENSCSAG00000006443	DAGLA	diacylglycerol lipase alpha	74.1358	0.324995	0.171411	1.89983	0.0574558	NA	0.0574558	1	101.982	77.3094	63.9091	53.3425
ENSCSAG00000007133	AGFG1		125.972	0.324804	0.167259	1.94158	0.052188	0.316884	0.052188	0.316884	117.782	179.217	102.255	104.633
ENSCSAG00000013290	ARG2	arginase 2	29.2312	0.324543	0.162696	2.00313	0.0451633	NA	0.0451633	1	44.5275	32.7979	20.4509	19.1486
ENSCSAG00000018245	ATP9B	ATPase phospholipid transporting 9B (putative)	172.904	0.324334	0.157144	2.06516	0.0389075	0.272913	0.0389075	0.272913	203.965	196.788	146.565	144.298
ENSCSAG00000001806	TUFT1	tuftelin 1	235.902	0.324297	0.150745	2.15258	0.0313515	0.240438	0.0313515	0.240438	282.965	260.041	207.065	193.538
ENSCSAG00000014693	ZNF335	zinc finger protein 335	94.6867	0.324272	0.168592	1.92406	0.0543476	0.322871	0.0543476	0.322871	106.291	118.307	74.1345	80.0138
ENSCSAG00000007262	ROR2	receptor tyrosine kinase like orphan receptor 2	159.301	0.324256	0.159402	2.03581	0.0417698	0.283763	0.0417698	0.283763	191.037	179.217	139.748	127.201
ENSCSAG00000015687	RBMS1	RNA binding motif single stranded interacting protein 1	234.25	0.324167	0.156717	2.06824	0.038617	0.272082	0.038617	0.272082	249.929	292.839	167.868	226.364
ENSCSAG00000016371	SLC38A9	solute carrier family 38 member 9	40.8093	0.324152	0.1668	1.94219	0.0521137	NA	0.0521137	1	43.0911	62.0818	20.4509	37.6133
ENSCSAG00000012120	LPAR1	lysophosphatidic acid receptor 1	176.444	0.324084	0.159219	2.03551	0.0417998	0.283763	0.0417998	0.283763	191.037	219.043	132.931	162.763
ENSCSAG00000013670	JAG1	jagged canonical Notch ligand 1	661.355	0.323743	0.129548	2.49935	0.0124422	0.154357	0.0124422	0.154357	731.113	769.58	560.696	584.032
ENSCSAG00000000023	COX3	cytochrome c oxidase subunit III	1826.5	0.323715	0.156498	2.1049	0.0353001	0.258212	0.0353001	0.258212	1884.52	3120.49	833.374	1467.6
ENSCSAG00000013532	PFKFB3		286.711	0.323676	0.148779	2.17694	0.029485	0.234656	0.029485	0.234656	350.475	308.066	263.305	224.996
ENSCSAG00000012132	VPS13C	vacuolar protein sorting 13 homolog C	336.412	0.323368	0.145402	2.2241	0.0261415	0.221416	0.0261415	0.221416	360.529	409.974	266.714	308.429
ENSCSAG00000013169	CDK5RAP2	CDK5 regulatory subunit associated protein 2	180.258	0.323286	0.158172	2.04574	0.0407819	0.27925	0.0407819	0.27925	229.819	188.588	157.642	144.982
ENSCSAG00000004819	LLGL2	LLGL scribble cell polarity complex component 2	417.58	0.323041	0.145163	2.22659	0.0259746	0.220914	0.0259746	0.220914	530.021	426.373	387.715	326.21
ENSCSAG00000007807	RPAP1	RNA polymerase II associated protein 1	71.3218	0.32288	0.171591	1.88539	0.0593767	NA	0.0593767	1	90.4914	81.9948	65.6133	47.1876
ENSCSAG00000007472	AGTPBP1	ATP/GTP binding protein 1	121.951	0.322813	0.164763	1.95981	0.0500178	0.310217	0.0500178	0.310217	133.583	152.276	97.9939	103.95
ENSCSAG00000006934	TRAPPC12	trafficking protein particle complex 12	153.154	0.322769	0.159745	2.02167	0.0432108	0.289306	0.0432108	0.289306	176.674	179.217	129.522	127.201
ENSCSAG00000006301	CBLB	Cbl proto-oncogene B	44.683	0.322643	0.170289	1.8956	0.0580135	NA	0.0580135	1	54.5821	57.3964	29.8242	36.9294
ENSCSAG00000007724	GNAQ		154.758	0.322472	0.16096	2.00408	0.0450612	0.294494	0.0450612	0.294494	183.856	176.874	116.741	141.563
ENSCSAG00000016726	STIM2	stromal interaction molecule 2	41.6729	0.322203	0.169507	1.9016	0.0572239	NA	0.0572239	1	48.8366	56.225	28.12	33.5101
ENSCSAG00000001517	COL11A1	collagen type XI alpha 1 chain	4659.21	0.322193	0.114108	2.82369	0.00474739	0.0850613	0.00474739	0.0850613	5179.56	5322.63	4242.71	3891.95
ENSCSAG00000013414	NISCH		144.847	0.322165	0.161945	1.99087	0.0464955	0.298655	0.0464955	0.298655	165.183	172.189	131.227	110.788
ENSCSAG00000006709			15.8263	0.3219	0.143494	2.26902	0.0232671	NA	0.0232671	1	22.9819	23.4271	9.37333	7.52267
ENSCSAG00000002581	BRAP		153.704	0.321578	0.162405	1.98	0.0477032	0.301585	0.0477032	0.301585	166.619	192.102	112.48	143.615
ENSCSAG00000005218	KIF18A	kinesin family member 18A	118.24	0.32113	0.166876	1.92428	0.0543201	0.322871	0.0543201	0.322871	133.583	145.248	82.6557	111.472
ENSCSAG00000001480	DNTTIP2	deoxynucleotidyltransferase terminal interacting protein 2	208.688	0.321088	0.159144	2.01719	0.0436756	0.290574	0.0436756	0.290574	203.965	279.954	159.347	191.486
ENSCSAG00000017060	RBM47	RNA binding motif protein 47	275.942	0.321063	0.146985	2.18489	0.0288966	0.232256	0.0288966	0.232256	301.638	330.322	235.185	236.622
ENSCSAG00000006441	IL4R	interleukin 4 receptor	123.037	0.320826	0.167106	1.92285	0.0544987	0.323106	0.0544987	0.323106	170.928	119.478	107.367	94.3753
ENSCSAG00000009771	RFX2		49.9055	0.320279	0.171279	1.87106	0.0613366	NA	0.0613366	1	58.8912	64.4245	36.6412	39.665
ENSCSAG00000005309	KLHL26		64.7912	0.319928	0.17172	1.86642	0.061982	NA	0.061982	1	83.3095	73.7953	56.24	45.8199
ENSCSAG00000002453	TBCEL		78.3584	0.319918	0.170633	1.87549	0.0607259	NA	0.0607259	1	89.055	98.3938	59.6485	66.3362
ENSCSAG00000009893	NRF1	nuclear respiratory factor 1	75.687	0.319828	0.171628	1.8634	0.0624063	NA	0.0624063	1	93.3642	90.1943	46.0145	73.175
ENSCSAG00000008400	CCHCR1	coiled-coil alpha-helical rod protein 1	61.6603	0.31956	0.171766	1.86344	0.0624	NA	0.0624	1	87.6187	63.2531	45.1624	50.607
ENSCSAG00000012317	SBNO2	strawberry notch homolog 2	191.169	0.319418	0.157513	2.02951	0.0424064	0.28625	0.0424064	0.28625	224.074	217.872	179.798	142.931
ENSCSAG00000007603	GKAP1	G kinase anchoring protein 1	61.4616	0.31933	0.171759	1.8601	0.0628715	NA	0.0628715	1	73.2549	76.138	45.1624	51.2909
ENSCSAG00000008308	PALD1		16.9974	0.319227	0.14492	2.22145	0.0263204	NA	0.0263204	1	27.2911	22.2557	6.81697	11.6259
ENSCSAG00000003363	SMG9	SMG9 nonsense mediated mRNA decay factor	56.8004	0.319198	0.171492	1.86567	0.0620874	NA	0.0620874	1	70.3822	69.1099	52.8315	34.8778
ENSCSAG00000006647	CSKMT	citrate synthase lysine methyltransferase	1648.16	0.319143	0.142582	2.23882	0.0251676	0.218177	0.0251676	0.218177	2101.41	1659.81	1653.11	1178.32
ENSCSAG00000008940			89.7514	0.3191	0.16908	1.88852	0.0589565	0.332364	0.0589565	0.332364	106.291	106.593	71.5782	74.5428
ENSCSAG00000006478	OCA2	OCA2 melanosomal transmembrane protein	53.4375	0.319052	0.1713	1.86674	0.0619374	NA	0.0619374	1	66.0731	65.5958	48.5709	33.5101
ENSCSAG00000005103	PIM3	Pim-3 proto-oncogene, serine/threonine kinase	92.6048	0.318843	0.168931	1.8893	0.0588511	0.332364	0.0588511	0.332364	117.782	101.908	74.1345	76.5944
ENSCSAG00000001836	POLE		222.646	0.318555	0.151761	2.1002	0.0357112	0.260006	0.0357112	0.260006	267.165	244.813	189.171	189.434
ENSCSAG00000001617	LRIG2		116.145	0.31851	0.165845	1.92136	0.0546861	0.323106	0.0546861	0.323106	139.328	133.534	87.7685	103.95
ENSCSAG00000014979	DAG1	dystroglycan 1	621.876	0.318459	0.130896	2.43339	0.0149581	0.171793	0.0149581	0.171793	690.895	718.04	558.139	520.432
ENSCSAG00000018272	GALNT17		180.183	0.318359	0.15728	2.02548	0.0428179	0.288116	0.0428179	0.288116	205.401	210.844	163.607	140.879
ENSCSAG00000006061	FMNL3	formin like 3	102.397	0.31808	0.167503	1.90094	0.0573102	0.329495	0.0573102	0.329495	127.837	113.621	86.0642	82.0654
ENSCSAG00000009622	OSBPL10		189.041	0.317967	0.155486	2.0459	0.0407664	0.27925	0.0407664	0.27925	209.71	226.071	164.459	155.924
ENSCSAG00000013910	FAM83D		212.81	0.317833	0.160534	1.97946	0.0477643	0.301602	0.0477643	0.301602	229.819	264.726	144.008	212.686
ENSCSAG00000003510	UBTF		308.198	0.317803	0.14769	2.15314	0.0313075	0.240438	0.0313075	0.240438	384.948	320.951	278.644	248.248
ENSCSAG00000008857	CDAN1	codanin 1	38.9968	0.317742	0.167195	1.90469	0.0568204	NA	0.0568204	1	60.3276	39.826	23.0073	32.8262
ENSCSAG00000004527	MON2	MON2 homolog, regulator of endosome-to-Golgi trafficking	228.536	0.317553	0.15175	2.09304	0.0363456	0.262813	0.0363456	0.262813	248.492	276.44	187.467	201.744
ENSCSAG00000011439	ZNF77		46.3017	0.317552	0.170625	1.86284	0.0624846	NA	0.0624846	1	60.3276	55.0537	31.5285	38.2972
ENSCSAG00000012609	RBM48	RNA binding motif protein 48	37.014	0.317548	0.16361	1.94014	0.0523627	NA	0.0523627	1	35.9093	60.9104	17.0424	34.1939
ENSCSAG00000002765	MED24	mediator complex subunit 24	324.203	0.317509	0.150953	2.10488	0.0353017	0.258212	0.0353017	0.258212	423.73	320.951	299.094	253.035
ENSCSAG00000013299	PI4KA	phosphatidylinositol 4-kinase alpha	172.927	0.317184	0.157937	2.00985	0.0444474	0.293807	0.0444474	0.293807	205.401	194.445	155.086	136.776
ENSCSAG00000000916	EPHB2		398.164	0.316957	0.141998	2.23317	0.0255376	0.22048	0.0255376	0.22048	481.184	426.373	366.412	318.687
ENSCSAG00000017719	USP42	ubiquitin specific peptidase 42	123.198	0.316743	0.166264	1.90474	0.0568134	0.328873	0.0568134	0.328873	124.964	163.99	93.7333	110.104
ENSCSAG00000000058			107.37	0.316679	0.167624	1.89118	0.0586009	0.331932	0.0586009	0.331932	142.201	111.279	84.36	91.6397
ENSCSAG00000003604	NOX4		52.8021	0.316539	0.170909	1.85283	0.0639063	NA	0.0639063	1	70.3822	60.9104	30.6764	49.2393
ENSCSAG00000013572	STAU2		314.137	0.316137	0.147598	2.14194	0.032198	0.245738	0.032198	0.245738	326.056	392.404	252.228	285.861
ENSCSAG00000013269	SLC4A11		40.2573	0.316026	0.169219	1.86904	0.0616167	NA	0.0616167	1	47.4003	53.8823	28.9721	30.7745
ENSCSAG00000014567	UBA7	ubiquitin like modifier activating enzyme 7	28.9547	0.315966	0.161909	1.95278	0.050846	NA	0.050846	1	33.0365	43.3401	16.1903	23.2519
ENSCSAG00000016401	CC2D2A	coiled-coil and C2 domain containing 2A	80.8421	0.315766	0.170587	1.85118	0.0641432	NA	0.0641432	1	86.1823	106.593	62.2048	68.3879
ENSCSAG00000007468	HSPBAP1	HSPB1 associated protein 1	53.0596	0.315699	0.171581	1.84194	0.0654841	NA	0.0654841	1	63.2003	66.7672	42.6061	39.665
ENSCSAG00000004023			155.884	0.31569	0.160262	1.97023	0.0488114	0.30547	0.0488114	0.30547	168.055	193.273	126.114	136.092
ENSCSAG00000016111	MAN2B2		74.5048	0.315508	0.170981	1.84615	0.0648698	NA	0.0648698	1	83.3095	94.8797	59.6485	60.1813
ENSCSAG00000002350	CBX2	chromobox 2	180.721	0.315343	0.158268	1.99424	0.0461255	0.297488	0.0461255	0.297488	219.765	197.959	167.016	138.143
ENSCSAG00000014882	SPIDR	scaffold protein involved in DNA repair	169.676	0.314693	0.162347	1.93818	0.0526011	0.318172	0.0526011	0.318172	160.874	233.1	139.748	144.982
ENSCSAG00000011835			62.0597	0.314386	0.171738	1.83167	0.067001	NA	0.067001	1	61.764	89.0229	53.6836	43.7682
ENSCSAG00000013465	ZFHX4	zinc finger homeobox 4	301.983	0.313709	0.147118	2.13256	0.0329612	0.248565	0.0329612	0.248565	316.002	373.662	248.819	269.448
ENSCSAG00000007070			127.008	0.313153	0.163943	1.9108	0.0560306	0.326433	0.0560306	0.326433	145.074	151.105	99.6982	112.156
ENSCSAG00000010238			917.513	0.313083	0.133315	2.34903	0.0188222	0.187836	0.0188222	0.187836	1095.95	981.595	878.537	713.969
ENSCSAG00000003885	EMSY	EMSY transcriptional repressor, BRCA2 interacting	77.5678	0.313028	0.171177	1.82904	0.0673934	NA	0.0673934	1	77.5641	107.765	64.7612	60.1813
ENSCSAG00000002411	HSPA8	heat shock protein family A (Hsp70) member 8	7160.89	0.313024	0.113704	2.75301	0.00590505	0.097524	0.00590505	0.097524	7759.28	8329.5	6041.54	6513.26
ENSCSAG00000000698			76.692	0.312664	0.170782	1.83283	0.0668284	NA	0.0668284	1	97.6733	85.5089	61.3527	62.233
ENSCSAG00000012732	THADA		278.644	0.312463	0.14621	2.13791	0.0325242	0.247017	0.0325242	0.247017	316.002	319.78	242.854	235.938
ENSCSAG00000001218	NASP		599.014	0.312345	0.140261	2.22767	0.0259026	0.220914	0.0259026	0.220914	775.641	586.849	517.237	516.328
ENSCSAG00000010710	MTBP		130.975	0.312235	0.165017	1.89421	0.0581971	0.331763	0.0581971	0.331763	175.237	131.192	107.367	110.104
ENSCSAG00000014487	ARSK	arylsulfatase family member K	49.5547	0.312081	0.170247	1.83177	0.0669856	NA	0.0669856	1	53.1457	70.2813	28.9721	45.8199
ENSCSAG00000006628		mannosidase alpha class 2B member 1	203.887	0.311804	0.154224	2.02313	0.0430596	0.288905	0.0430596	0.288905	248.492	220.215	177.241	169.602
ENSCSAG00000009121	TP53BP1	tumor protein p53 binding protein 1	237.211	0.311662	0.150432	2.07233	0.038235	0.270899	0.038235	0.270899	264.292	278.782	195.136	210.635
ENSCSAG00000007548	RANBP9		170.45	0.311323	0.164015	1.89739	0.0577759	0.331113	0.0577759	0.331113	163.746	233.1	123.558	161.395
ENSCSAG00000015546	FIGN	fidgetin, microtubule severing factor	62.4455	0.311279	0.171756	1.81265	0.0698857	NA	0.0698857	1	68.9458	81.9948	46.8667	51.9748
ENSCSAG00000017156	TICRR		79.2446	0.311166	0.170849	1.82345	0.0682356	NA	0.0682356	1	106.291	83.1662	60.5006	67.0201
ENSCSAG00000015357	GAK	cyclin G associated kinase	442.773	0.310948	0.147206	2.11353	0.0345555	0.2557	0.0345555	0.2557	557.312	453.314	429.469	330.997
ENSCSAG00000014899	YTHDC2	YTH domain containing 2	100.05	0.310758	0.168141	1.84889	0.0644742	0.351057	0.0644742	0.351057	106.291	128.849	84.36	80.6977
ENSCSAG00000004021		actinin alpha 4	777.292	0.310526	0.133044	2.33466	0.0195612	0.190491	0.0195612	0.190491	955.187	803.549	712.373	638.059
ENSCSAG00000003915	GDPD5	glycerophosphodiester phosphodiesterase domain containing 5	104.062	0.310114	0.168909	1.83649	0.0662856	0.353617	0.0662856	0.353617	101.982	142.905	92.0291	79.3299
ENSCSAG00000013393	UCHL5		716.237	0.30978	0.142746	2.17017	0.0299937	0.236359	0.0299937	0.236359	808.677	821.119	512.977	722.176
ENSCSAG00000007060	ID2		272.27	0.309564	0.151133	2.04833	0.0405282	0.279022	0.0405282	0.279022	293.02	330.322	207.918	257.822
ENSCSAG00000003438	ANAPC10	anaphase promoting complex subunit 10	67.3898	0.309511	0.171774	1.80081	0.0717326	NA	0.0717326	1	71.8186	91.3656	43.4582	62.9168
ENSCSAG00000006235	SH3BP4	SH3 domain binding protein 4	167.158	0.309225	0.158894	1.94749	0.0514766	0.315805	0.0514766	0.315805	191.037	194.445	152.53	130.621
ENSCSAG00000012006	SLC39A10	solute carrier family 39 member 10	404.89	0.308899	0.141396	2.1848	0.0289035	0.232256	0.0289035	0.232256	432.348	487.283	327.214	372.714
ENSCSAG00000018060			339.045	0.308702	0.143096	2.15826	0.030908	0.239944	0.030908	0.239944	393.566	377.176	308.468	276.971
ENSCSAG00000008134	PACS1	phosphofurin acidic cluster sorting protein 1	715.877	0.308507	0.130473	2.3647	0.0180445	0.186941	0.0180445	0.186941	758.404	857.431	607.562	640.11
ENSCSAG00000011190	NRCAM	neuronal cell adhesion molecule	158.195	0.308264	0.161275	1.91142	0.055951	0.326269	0.055951	0.326269	169.492	196.788	120.149	146.35
ENSCSAG00000017106	UTRN	utrophin	726.299	0.30809	0.130863	2.35445	0.0185504	0.187259	0.0185504	0.187259	765.586	873.83	612.675	653.104
ENSCSAG00000013792		RAD50 double strand break repair protein	168.295	0.308086	0.158238	1.94765	0.0514571	0.315805	0.0514571	0.315805	192.474	195.616	134.635	150.453
ENSCSAG00000014820		cell growth regulator with ring finger domain 1	51.235	0.308063	0.171388	1.79831	0.0721277	NA	0.0721277	1	57.4549	67.9385	39.1976	40.3488
ENSCSAG00000017773			2065.41	0.30783	0.127537	2.41396	0.01578	0.176244	0.01578	0.176244	2486.36	2169.35	1973.51	1632.42
ENSCSAG00000001385	ERICH3	glutamate rich 3	8.09598	0.307803	0.112795	2.86261	0.00420169	NA	0.00420169	1	10.0546	18.7417	0.852121	2.73551
ENSCSAG00000003956	PPP1R12A		496.118	0.307664	0.134268	2.29182	0.021916	0.201252	0.021916	0.201252	550.13	571.621	424.356	438.366
ENSCSAG00000007446	CAPRIN2		82.7857	0.307651	0.170428	1.8054	0.0710122	NA	0.0710122	1	86.1823	110.107	66.4654	68.3879
ENSCSAG00000009348	HAUS6	HAUS augmin-like complex subunit 6	616.97	0.3069	0.140334	2.18719	0.0287284	0.232139	0.0287284	0.232139	741.168	659.472	466.11	601.129
ENSCSAG00000006363	ATG16L1	autophagy related 16 like 1	257.899	0.306891	0.152388	2.01436	0.0439716	0.291929	0.0439716	0.291929	308.82	282.296	194.284	246.196
ENSCSAG00000006329	DNAJB1	DnaJ heat shock protein family (Hsp40) member B1	283.56	0.306425	0.148094	2.06957	0.0384923	0.271905	0.0384923	0.271905	326.056	320.951	223.256	263.977
ENSCSAG00000015047	MYO3B		12.7847	0.305895	0.134975	2.30497	0.0211682	NA	0.0211682	1	20.1092	18.7417	6.81697	5.47103
ENSCSAG00000016628	ZGPAT		89.932	0.305784	0.170793	1.79427	0.0727695	0.372898	0.0727695	0.372898	124.964	89.0229	83.5079	62.233
ENSCSAG00000017180	ZFR	zinc finger RNA binding protein	400.065	0.305621	0.146682	2.08344	0.0372112	0.266934	0.0372112	0.266934	395.002	515.396	321.25	368.611
ENSCSAG00000011769	NDUFAF5	NADH:ubiquinone oxidoreductase complex assembly factor 5	64.4249	0.305561	0.171737	1.78254	0.0746604	NA	0.0746604	1	86.1823	69.1099	54.5357	47.8715
ENSCSAG00000017005	CPLANE1	ciliogenesis and planar polarity effector 1	251.254	0.305009	0.150968	2.02053	0.0433279	0.289478	0.0433279	0.289478	265.729	308.066	202.805	228.415
ENSCSAG00000015865	HTT	huntingtin	870.904	0.304988	0.125059	2.43909	0.0147243	0.170937	0.0147243	0.170937	995.405	964.025	750.719	773.467
ENSCSAG00000012333	NMD3	NMD3 ribosome export adaptor	293.022	0.304744	0.150205	2.02884	0.0424751	0.28625	0.0424751	0.28625	311.693	357.263	224.108	279.022
ENSCSAG00000004344	ARHGAP24	Rho GTPase activating protein 24	89.0199	0.304155	0.169922	1.79037	0.073395	0.37468	0.073395	0.37468	90.4914	119.478	74.9867	71.1234
ENSCSAG00000013741	NIBAN2	niban apoptosis regulator 2	893.474	0.304152	0.136403	2.23044	0.0257183	0.220487	0.0257183	0.220487	1136.17	884.372	825.705	727.647
ENSCSAG00000017531	FAM20C	FAM20C golgi associated secretory pathway kinase	345.076	0.30412	0.152258	1.99884	0.0456255	0.296014	0.0456255	0.296014	463.948	325.636	314.433	276.287
ENSCSAG00000010040	IFT172		52.6201	0.304109	0.171368	1.7751	0.0758811	NA	0.0758811	1	54.5821	73.7953	41.7539	40.3488
ENSCSAG00000016464	PTPRK	protein tyrosine phosphatase receptor type K	386.156	0.303786	0.144598	2.10092	0.0356478	0.259843	0.0356478	0.259843	390.693	486.112	316.989	350.83
ENSCSAG00000013052	MCM3	minichromosome maintenance complex component 3	566.844	0.30363	0.135588	2.24011	0.0250838	0.218001	0.0250838	0.218001	675.095	605.59	525.759	460.934
ENSCSAG00000008192	ZNF250	zinc finger protein 250	126.552	0.303624	0.164047	1.85136	0.0641178	0.350058	0.0641178	0.350058	137.892	155.79	103.107	109.421
ENSCSAG00000014027	RAD54L2	RAD54 like 2	221.473	0.303581	0.156662	1.93922	0.0524751	0.317983	0.0524751	0.317983	251.365	256.527	217.291	160.711
ENSCSAG00000002590	ATXN2		155.862	0.303536	0.165174	1.83694	0.0662195	0.353617	0.0662195	0.353617	156.564	206.158	108.219	152.505
ENSCSAG00000012081	RORA		15.2926	0.303149	0.141915	2.15599	0.0310846	NA	0.0310846	1	18.6728	25.7698	8.52121	8.20654
ENSCSAG00000013231	BRD8		239.679	0.303045	0.151148	2.0053	0.0449309	0.294494	0.0449309	0.294494	252.801	294.01	201.953	209.951
ENSCSAG00000004728	BAG3	BAG cochaperone 3	104.229	0.302906	0.167295	1.81148	0.0700666	0.364314	0.0700666	0.364314	113.473	130.02	88.6206	84.801
ENSCSAG00000013545	STPG4		17.333	0.302377	0.147141	2.06816	0.0386249	NA	0.0386249	1	24.4183	24.5984	9.37333	10.9421
ENSCSAG00000011594	BIRC6	baculoviral IAP repeat containing 6	572.008	0.302336	0.134371	2.25019	0.024437	0.214442	0.024437	0.214442	609.022	681.728	475.484	521.799
ENSCSAG00000002910	FAT1		1307.86	0.302097	0.120179	2.51392	0.0119396	0.150782	0.0119396	0.150782	1436.37	1496.99	1147.81	1150.28
ENSCSAG00000001641	ZNF547		25.9374	0.301851	0.158477	1.90658	0.0565755	NA	0.0565755	1	31.6002	37.4833	12.7818	21.8841
ENSCSAG00000013433	GPCPD1	glycerophosphocholine phosphodiesterase 1	57.0897	0.301766	0.171548	1.75894	0.0785878	NA	0.0785878	1	68.9458	70.2813	35.7891	53.3425
ENSCSAG00000003344		40S ribosomal protein S3a	692.972	0.301646	0.128722	2.34369	0.0190938	0.188466	0.0190938	0.188466	755.531	803.549	604.154	608.652
ENSCSAG00000007117	PLCB3		307.592	0.301226	0.157619	1.91284	0.0557686	0.325923	0.0557686	0.325923	429.475	277.611	284.608	238.674
ENSCSAG00000002675	CACNB1		23.9433	0.300926	0.157625	1.91709	0.055227	NA	0.055227	1	35.9093	28.1125	15.3382	16.4131
ENSCSAG00000004099	CEP112	centrosomal protein of 112 kDa	251.385	0.300807	0.151939	1.97991	0.047714	0.301585	0.047714	0.301585	272.911	301.038	194.284	237.306
ENSCSAG00000013292	TPR		488.795	0.300706	0.135963	2.21193	0.0269717	0.223748	0.0269717	0.223748	525.712	577.478	411.574	440.418
ENSCSAG00000015436	FAM169A	family with sequence similarity 169 member A	145.492	0.30069	0.164499	1.82827	0.0675088	0.357046	0.0675088	0.357046	176.674	161.647	101.402	142.247
ENSCSAG00000001349	CACHD1		154.056	0.300638	0.160237	1.87722	0.0604874	0.336591	0.0604874	0.336591	169.492	185.074	137.191	124.466
ENSCSAG00000018294	VKORC1L1		52.3172	0.300408	0.171449	1.75551	0.0791724	NA	0.0791724	1	68.9458	58.5677	43.4582	38.2972
ENSCSAG00000011909	SEMA3C	semaphorin 3C	1636.09	0.300383	0.129035	2.32794	0.0199154	0.190848	0.0199154	0.190848	1748.06	1932.73	1279.03	1584.55
ENSCSAG00000011468	EIF4A1	eukaryotic translation initiation factor 4A1	5610.59	0.300054	0.112665	2.66332	0.00773739	0.114862	0.00773739	0.114862	6449.31	6095.73	5061.6	4835.71
ENSCSAG00000008282	PARP12	poly(ADP-ribose) polymerase family member 12	99.5586	0.299952	0.167802	1.78927	0.073572	0.37468	0.073572	0.37468	119.219	113.621	86.0642	79.3299
ENSCSAG00000013176	TIPIN	TIMELESS interacting protein	369.27	0.299788	0.141965	2.11248	0.0346449	0.2557	0.0346449	0.2557	446.712	390.061	312.728	327.578
ENSCSAG00000002151	IQGAP3	IQ motif containing GTPase activating protein 3	113.246	0.299716	0.165603	1.81105	0.0701335	0.364314	0.0701335	0.364314	132.146	131.192	94.5854	95.0591
ENSCSAG00000003799			113.019	0.299571	0.168737	1.77447	0.0759848	0.37961	0.0759848	0.37961	109.164	155.79	81.8036	105.317
ENSCSAG00000004006	TET2	tet methylcytosine dioxygenase 2	117.313	0.299368	0.167548	1.78619	0.0740678	0.375202	0.0740678	0.375202	120.655	153.447	84.36	110.788
ENSCSAG00000013455	PIAS1	protein inhibitor of activated STAT 1	133.861	0.299153	0.163375	1.83153	0.067021	0.355144	0.067021	0.355144	140.764	168.675	112.48	113.524
ENSCSAG00000015290	AP3B1	adaptor related protein complex 3 subunit beta 1	306.693	0.29865	0.145918	2.04711	0.0406469	0.279232	0.0406469	0.279232	321.747	373.662	270.122	261.242
ENSCSAG00000017879	GAREM1	GRB2 associated regulator of MAPK1 subtype 1	602.257	0.298523	0.13803	2.16274	0.0305611	0.238129	0.0305611	0.238129	606.149	753.181	498.491	551.206
ENSCSAG00000001186	PTPRF		249.532	0.298455	0.151713	1.96761	0.0491135	0.306451	0.0491135	0.306451	254.238	313.923	220.699	209.267
ENSCSAG00000009374	CLASP2		316.964	0.298392	0.148836	2.0048	0.0449848	0.294494	0.0449848	0.294494	317.438	402.946	258.193	289.281
ENSCSAG00000004972	EVPL		7.35357	0.298343	0.110315	2.84427	0.00445133	NA	0.00445133	1	15.8001	10.5422	1.70424	1.36776
ENSCSAG00000017428	EXOC3	exocyst complex component 3	158.617	0.298175	0.161555	1.84555	0.0649577	0.351209	0.0649577	0.351209	166.619	199.13	121.001	147.718
ENSCSAG00000006683			63.3004	0.298058	0.171198	1.74568	0.0808661	NA	0.0808661	1	73.2549	80.8234	65.6133	33.5101
ENSCSAG00000008533	GSG1	germ cell associated 1	7.12987	0.298007	0.101197	3.06477	0.00217839	NA	0.00217839	1	22.9819	4.68542	0.852121	0
ENSCSAG00000012291	YLPM1		235.632	0.297748	0.150492	1.97903	0.0478124	0.301604	0.0478124	0.301604	259.983	276.44	196.84	209.267
ENSCSAG00000012712	RAD54B	RAD54 homolog B	41.5538	0.297622	0.168777	1.763	0.0779004	NA	0.0779004	1	48.8366	55.0537	24.7115	37.6133
ENSCSAG00000009046	PTPRD		75.2085	0.297494	0.171412	1.73492	0.0827547	NA	0.0827547	1	74.6913	104.251	56.24	65.6524
ENSCSAG00000007111	GSK3B	glycogen synthase kinase 3 beta	244.004	0.297478	0.156276	1.9034	0.056988	0.328894	0.056988	0.328894	229.819	327.979	206.213	212.002
ENSCSAG00000014674	ASCC3	activating signal cointegrator 1 complex subunit 3	257.48	0.297447	0.148353	2.00556	0.0449036	0.294494	0.0449036	0.294494	281.529	303.381	220.699	224.312
ENSCSAG00000011962	DHX36	DEAH-box helicase 36	268.341	0.297438	0.147876	2.01183	0.0442377	0.293102	0.0442377	0.293102	294.456	315.094	222.404	241.409
ENSCSAG00000012558	PLXDC2		166.835	0.297349	0.160994	1.84678	0.0647796	0.35117	0.0647796	0.35117	170.928	213.186	128.67	154.557
ENSCSAG00000004816	DDIT3	DNA damage inducible transcript 3	57.6588	0.297309	0.171249	1.74184	0.0815372	NA	0.0815372	1	83.3095	57.3964	53.6836	36.2456
ENSCSAG00000007096	KRI1		62.5724	0.297266	0.171717	1.73299	0.0830967	NA	0.0830967	1	76.1277	73.7953	51.1273	49.2393
ENSCSAG00000007781	VPS13A		362.391	0.296831	0.143175	2.07343	0.0381325	0.27072	0.0381325	0.27072	396.439	424.03	290.573	338.52
ENSCSAG00000004663	LSM14A		161.696	0.296675	0.160294	1.85099	0.0641706	0.350058	0.0641706	0.350058	166.619	204.987	132.931	142.247
ENSCSAG00000002143	MEF2D	myocyte enhancer factor 2D	89.2309	0.296648	0.169607	1.75128	0.0798975	0.390813	0.0798975	0.390813	107.728	101.908	80.9515	66.3362
ENSCSAG00000009059	IFT122	intraflagellar transport 122	198.811	0.296489	0.154388	1.9213	0.0546936	0.323106	0.0546936	0.323106	234.129	220.215	164.459	176.441
ENSCSAG00000013092	LUC7L	LUC7 like	185.833	0.29642	0.162594	1.82541	0.0679389	0.357979	0.0679389	0.357979	249.929	179.217	178.093	136.092
ENSCSAG00000006231	SENP7		45.0313	0.296378	0.169409	1.74815	0.0804374	NA	0.0804374	1	47.4003	64.4245	27.2679	41.0327
ENSCSAG00000008293	IER3	immediate early response 3	316.793	0.296307	0.146906	2.01814	0.0435769	0.290222	0.0435769	0.290222	377.766	340.864	298.242	250.3
ENSCSAG00000001479	BCAR3	BCAR3 adaptor protein, NSP family member	77.99	0.296266	0.170673	1.73781	0.0822451	NA	0.0822451	1	99.1096	85.5089	63.057	64.2846
ENSCSAG00000001804			47.811	0.295731	0.170644	1.73755	0.0822897	NA	0.0822897	1	64.6367	52.7109	41.7539	32.1423
ENSCSAG00000003582	LARP1B		64.2655	0.295492	0.171764	1.72251	0.0849779	NA	0.0849779	1	71.8186	81.9948	58.7964	44.4521
ENSCSAG00000001082	SFPQ	splicing factor proline and glutamine rich	1027.34	0.29544	0.126385	2.33789	0.0193929	0.189937	0.0193929	0.189937	1107.44	1195.95	955.228	850.745
ENSCSAG00000000754	PER3	period circadian regulator 3	181.547	0.295353	0.159322	1.85378	0.0637703	0.349329	0.0637703	0.349329	196.783	220.215	135.487	173.705
ENSCSAG00000004100	ZFC3H1	zinc finger C3H1-type containing	165.349	0.294999	0.160466	1.8385	0.0659892	0.353617	0.0659892	0.353617	182.419	197.959	124.41	156.608
ENSCSAG00000017583	MAD1L1	mitotic arrest deficient 1 like 1	200.831	0.294621	0.160984	1.832	0.0669507	0.355069	0.0669507	0.355069	241.31	220.215	203.657	138.143
ENSCSAG00000018910	ZBTB38	zinc finger and BTB domain containing 38	287.148	0.294571	0.154719	1.90356	0.056968	0.328894	0.056968	0.328894	274.347	380.69	224.108	269.448
ENSCSAG00000017204	FRYL	FRY like transcription coactivator	281.082	0.293999	0.151383	1.94204	0.0521323	0.316884	0.0521323	0.316884	298.765	340.864	213.882	270.816
ENSCSAG00000008118	TOP3A	DNA topoisomerase III alpha	122.019	0.293991	0.164405	1.78962	0.0735158	0.37468	0.0735158	0.37468	146.51	135.877	103.107	102.582
ENSCSAG00000007677	INTS13	integrator complex subunit 13	219.742	0.293883	0.15255	1.92701	0.0539781	0.322188	0.0539781	0.322188	234.129	265.897	190.875	188.067
ENSCSAG00000001203		ribosomal protein S8	4687.28	0.293883	0.112493	2.61255	0.00898698	0.126077	0.00898698	0.126077	5226.96	5230.1	4257.2	4034.88
ENSCSAG00000015664	NSD2	nuclear receptor binding SET domain protein 2	975.433	0.293522	0.124384	2.36017	0.0182665	0.186941	0.0182665	0.186941	1131.86	1053.05	870.868	845.958
ENSCSAG00000010664		TBC1 domain family member 31	343.385	0.293473	0.146468	2.0037	0.0451027	0.294494	0.0451027	0.294494	363.402	414.659	269.27	326.21
ENSCSAG00000015971	TRMT44		66.6838	0.293439	0.171597	1.71108	0.0870657	NA	0.0870657	1	81.8732	77.3094	49.423	58.1297
ENSCSAG00000001410	ADGRL2	adhesion G protein-coupled receptor L2	458.873	0.293417	0.137663	2.13164	0.0330366	0.248836	0.0330366	0.248836	492.675	541.166	381.75	419.902
ENSCSAG00000003535	SLC25A3	solute carrier family 25 member 3	6000.83	0.293383	0.118114	2.48395	0.0129936	0.158401	0.0129936	0.158401	6169.22	7238.97	5243.1	5352.03
ENSCSAG00000005959			25.735	0.293367	0.157792	1.8618	0.0626315	NA	0.0626315	1	34.4729	33.9693	11.9297	22.568
ENSCSAG00000013644	FBH1		202.72	0.293331	0.153909	1.90705	0.0565136	0.327925	0.0565136	0.327925	238.438	223.729	179.798	168.918
ENSCSAG00000017619	BRAT1		124.878	0.293123	0.167827	1.74959	0.0801884	0.39139	0.0801884	0.39139	169.492	121.821	119.297	88.9042
ENSCSAG00000015492	ARHGEF28	Rho guanine nucleotide exchange factor 28	498.72	0.292978	0.135866	2.15664	0.0310339	0.240438	0.0310339	0.240438	525.712	596.219	434.582	438.366
ENSCSAG00000006320			43.0872	0.292763	0.170097	1.72383	0.0847381	NA	0.0847381	1	54.5821	51.5396	34.0848	32.1423
ENSCSAG00000009170	ZNF503	zinc finger protein 503	102.354	0.292486	0.167694	1.7448	0.0810198	0.393409	0.0810198	0.393409	119.219	119.478	78.3951	92.3236
ENSCSAG00000008933	ZSWIM8		163.941	0.292424	0.15829	1.84842	0.0645416	0.351102	0.0645416	0.351102	186.728	188.588	142.304	138.143
ENSCSAG00000011126	ZNF277	zinc finger protein 277	86.7773	0.292319	0.171109	1.70717	0.0877897	0.40962	0.0877897	0.40962	84.7459	120.649	59.6485	82.0654
ENSCSAG00000012360	QSOX1	quiescin sulfhydryl oxidase 1	169.775	0.29221	0.164921	1.77427	0.0760188	0.37961	0.0760188	0.37961	216.892	175.703	172.981	113.524
ENSCSAG00000002843	SPG7		68283.2	0.291801	0.150243	1.98521	0.0471211	0.299688	0.0471211	0.299688	60877.7	127723	34047.3	50484.6
ENSCSAG00000005057	AASDH	aminoadipate-semialdehyde dehydrogenase	350.009	0.291774	0.14818	1.96897	0.048956	0.305769	0.048956	0.305769	341.856	450.971	290.573	316.636
ENSCSAG00000007517	HERC4	HECT and RLD domain containing E3 ubiquitin protein ligase 4	192.498	0.291546	0.158153	1.84426	0.0651445	0.351381	0.0651445	0.351381	239.874	201.473	147.417	181.228
ENSCSAG00000001158	EDN2		90.9463	0.291436	0.170584	1.71179	0.0869348	0.408745	0.0869348	0.408745	129.273	85.5089	79.2473	69.7556
ENSCSAG00000010548	CEP152	centrosomal protein 152	49.9295	0.291387	0.171022	1.70484	0.0882244	NA	0.0882244	1	64.6367	57.3964	33.2327	44.4521
ENSCSAG00000013274	PHF14	PHD finger protein 14	268.279	0.291318	0.150176	1.94076	0.0522871	0.317181	0.0522871	0.317181	294.456	313.923	254.784	209.951
ENSCSAG00000012911	RIPK2	receptor interacting serine/threonine kinase 2	88.9367	0.291235	0.170472	1.70777	0.0876795	0.40962	0.0876795	0.40962	94.8005	114.793	61.3527	84.801
ENSCSAG00000017364	NCAPH	non-SMC condensin I complex subunit H	278.475	0.290958	0.147771	1.96929	0.0489203	0.305769	0.0489203	0.305769	294.456	336.179	234.333	248.932
ENSCSAG00000009870	PPM1G	protein phosphatase, Mg2+/Mn2+ dependent 1G	570.123	0.290754	0.133747	2.17456	0.0296633	0.235483	0.0296633	0.235483	669.349	611.447	522.35	477.347
ENSCSAG00000015860	MARK1	microtubule affinity regulating kinase 1	58.6835	0.290596	0.171166	1.69587	0.0899112	NA	0.0899112	1	56.0185	86.6802	36.6412	55.3942
ENSCSAG00000003705	EXOSC9	exosome component 9	74.0498	0.290436	0.171367	1.69526	0.0900259	NA	0.0900259	1	90.4914	85.5089	51.1273	69.0717
ENSCSAG00000016343	KDM3A	lysine demethylase 3A	174.068	0.290337	0.157817	1.84047	0.0656987	0.353165	0.0656987	0.353165	186.728	210.844	155.086	143.615
ENSCSAG00000017893	NOL4	nucleolar protein 4	47.1826	0.290259	0.170413	1.70411	0.0883613	NA	0.0883613	1	47.4003	67.9385	39.1976	34.1939
ENSCSAG00000004987	PDGFRA	platelet derived growth factor receptor alpha	9918.96	0.290188	0.113594	2.55464	0.0106299	0.139127	0.0106299	0.139127	10497	11610.5	8580.86	8987.53
ENSCSAG00000010737	PER1	period circadian regulator 1	62.8526	0.289998	0.171765	1.69023	0.0909831	NA	0.0909831	1	70.3822	79.6521	56.24	45.136
ENSCSAG00000006729	TJP1		422.967	0.289892	0.139156	2.08346	0.0372098	0.266934	0.0372098	0.266934	451.021	501.34	354.482	385.024
ENSCSAG00000017771	SMURF1	SMAD specific E3 ubiquitin protein ligase 1	219.628	0.289832	0.154732	1.87429	0.0608899	0.337939	0.0608899	0.337939	245.62	254.184	210.474	168.234
ENSCSAG00000010062	MARK3	microtubule affinity regulating kinase 3	219.615	0.289831	0.15296	1.89575	0.0579925	0.331763	0.0579925	0.331763	265.729	234.271	181.502	196.957
ENSCSAG00000012126	DAZAP1	DAZ associated protein 1	330.946	0.2897	0.144948	1.99956	0.0455478	0.295973	0.0455478	0.295973	406.493	342.035	284.608	290.648
ENSCSAG00000004722	PDE3B	phosphodiesterase 3B	171.457	0.289461	0.16079	1.80003	0.0718567	0.370703	0.0718567	0.370703	176.674	216.701	130.375	162.079
ENSCSAG00000002128	CCT3	chaperonin containing TCP1 subunit 3	1172.08	0.289357	0.122795	2.35672	0.018437	0.186941	0.018437	0.186941	1370.3	1249.84	1029.36	1038.81
ENSCSAG00000004777	EIF3A		1333.56	0.289327	0.120322	2.40486	0.0161788	0.17927	0.0161788	0.17927	1505.32	1472.39	1208.31	1148.23
ENSCSAG00000009598	JAG2	jagged canonical Notch ligand 2	60.6035	0.289304	0.17085	1.69997	0.0891375	NA	0.0891375	1	90.4914	57.3964	59.6485	34.8778
ENSCSAG00000015744	ZFYVE28	zinc finger FYVE-type containing 28	24.3103	0.289097	0.156267	1.86336	0.0624113	NA	0.0624113	1	40.2184	24.5984	18.7467	13.6776
ENSCSAG00000008640	PNPLA6	patatin like phospholipase domain containing 6	158.152	0.288948	0.160107	1.80634	0.0708659	0.367817	0.0708659	0.367817	193.91	168.675	141.452	128.569
ENSCSAG00000006141	TAOK2	TAO kinase 2	154.278	0.288805	0.163635	1.76704	0.0772222	0.382904	0.0772222	0.382904	209.71	146.419	133.783	127.201
ENSCSAG00000013444		CNKSR family member 3	134.105	0.288668	0.163171	1.76952	0.0768065	0.38204	0.0768065	0.38204	142.201	166.332	111.628	116.259
ENSCSAG00000006727	IKBKG		65.5322	0.288384	0.171729	1.68408	0.0921655	NA	0.0921655	1	91.9278	65.5958	62.2048	42.4005
ENSCSAG00000017290	SEMA4C	semaphorin 4C	124.62	0.288369	0.165834	1.74123	0.0816428	0.395042	0.0816428	0.395042	160.874	127.678	114.184	95.743
ENSCSAG00000012403	IGF2R	insulin like growth factor 2 receptor	217.272	0.288002	0.153353	1.87922	0.0602146	0.335663	0.0602146	0.335663	267.165	227.243	186.615	188.067
ENSCSAG00000009887	ATG7	autophagy related 7	94.9967	0.287933	0.169453	1.70193	0.0887687	0.410161	0.0887687	0.410161	126.401	96.0511	84.36	73.175
ENSCSAG00000010992	ARMC8	armadillo repeat containing 8	188.997	0.287849	0.155461	1.85225	0.0639904	0.350058	0.0639904	0.350058	205.401	224.9	163.607	162.079
ENSCSAG00000004536	USP15	ubiquitin specific peptidase 15	315.941	0.287389	0.147451	1.94913	0.0512803	0.315805	0.0512803	0.315805	337.547	377.176	248.819	300.223
ENSCSAG00000014636	SRFBP1	serum response factor binding protein 1	78.2578	0.287194	0.1708	1.68154	0.0926587	NA	0.0926587	1	84.7459	99.5651	59.6485	69.0717
ENSCSAG00000013679	UBA1	ubiquitin like modifier activating enzyme 1	858.528	0.287115	0.125741	2.28369	0.0223898	0.204079	0.0223898	0.204079	940.823	978.081	777.987	737.221
ENSCSAG00000000771	CLSTN1	calsyntenin 1	1342.61	0.287072	0.121934	2.35462	0.0185417	0.187259	0.0185417	0.187259	1541.23	1455.99	1237.28	1135.92
ENSCSAG00000003495	ARHGEF1	Rho guanine nucleotide exchange factor 1	97.8716	0.286986	0.169299	1.69797	0.0895141	0.411596	0.0895141	0.411596	129.273	99.5651	89.4727	73.175
ENSCSAG00000008514	ADCY3	adenylate cyclase 3	154.662	0.286768	0.1641	1.74985	0.0801448	0.39139	0.0801448	0.39139	198.219	158.133	150.825	111.472
ENSCSAG00000016090	FAM184A	family with sequence similarity 184 member A	28.0484	0.286765	0.161496	1.77851	0.0753197	NA	0.0753197	1	38.782	33.9693	16.1903	23.2519
ENSCSAG00000001098	THRAP3	thyroid hormone receptor associated protein 3	378.136	0.286712	0.14061	2.03942	0.0414083	0.282013	0.0414083	0.282013	417.984	433.401	314.433	346.726
ENSCSAG00000012506	NDUFAF6		32.4766	0.286497	0.165166	1.73886	0.0820602	NA	0.0820602	1	38.782	43.3401	27.2679	20.5164
ENSCSAG00000010975	DDX24	DEAD-box helicase 24	294.163	0.286493	0.148843	1.92602	0.0541019	0.322319	0.0541019	0.322319	366.275	299.867	268.418	242.093
ENSCSAG00000003578	CDYL2	chromodomain Y like 2	26.3293	0.2863	0.160648	1.78558	0.0741669	NA	0.0741669	1	34.4729	33.9693	17.0424	19.8325
ENSCSAG00000007885	ETNK1		221.206	0.286059	0.151569	1.88802	0.0590239	0.332364	0.0590239	0.332364	249.929	251.841	187.467	195.589
ENSCSAG00000008505	ATF7IP	activating transcription factor 7 interacting protein	229.728	0.285957	0.154959	1.84588	0.06491	0.351209	0.06491	0.351209	231.256	290.496	213.882	183.279
ENSCSAG00000008824	ARHGEF18		274.618	0.285953	0.146838	1.94799	0.0514163	0.315805	0.0514163	0.315805	310.256	310.409	230.925	246.88
ENSCSAG00000013521	FBXO5	F-box protein 5	73.321	0.285917	0.171388	1.66825	0.0952661	NA	0.0952661	1	84.7459	89.0229	51.1273	68.3879
ENSCSAG00000012145	RSRC1	arginine and serine rich coiled-coil 1	426.6	0.285757	0.142664	2.00302	0.045175	0.294662	0.045175	0.294662	448.148	513.053	338.292	406.908
ENSCSAG00000007877	HKDC1	hexokinase domain containing 1	1866.99	0.285755	0.122548	2.33204	0.0196985	0.19057	0.0196985	0.19057	2166.05	2000.67	1763.89	1537.36
ENSCSAG00000010182	SND1	staphylococcal nuclease and tudor domain containing 1	389.269	0.285607	0.139048	2.0547	0.0399078	0.276214	0.0399078	0.276214	445.275	429.887	346.813	335.101
ENSCSAG00000018127			186.674	0.285488	0.156542	1.82414	0.0681302	0.358619	0.0681302	0.358619	195.347	229.585	161.051	160.711
ENSCSAG00000015259	CDK13		180.595	0.285482	0.159358	1.79141	0.0732267	0.37454	0.0732267	0.37454	178.11	234.271	149.973	160.028
ENSCSAG00000007549	RAD51	RAD51 recombinase	41.3466	0.284609	0.169179	1.68647	0.0917046	NA	0.0917046	1	58.8912	43.3401	32.3806	30.7745
ENSCSAG00000005042	CEP135	centrosomal protein 135	186.007	0.284212	0.159253	1.78446	0.0743495	0.375726	0.0743495	0.375726	188.165	236.614	144.861	174.389
ENSCSAG00000015133	KLHDC8B	kelch domain containing 8B	84.7192	0.284143	0.170489	1.66912	0.0950928	NA	0.0950928	1	114.91	84.3375	69.8739	69.7556
ENSCSAG00000010874	RASSF4	Ras association domain family member 4	97.5609	0.28399	0.168297	1.68891	0.0912375	0.415295	0.0912375	0.415295	110.601	115.964	87.7685	75.9105
ENSCSAG00000016542	TRIM11	tripartite motif containing 11	31.2867	0.283885	0.164718	1.72819	0.0839534	NA	0.0839534	1	43.0911	36.312	23.8594	21.8841
ENSCSAG00000004743	GPATCH1		182.625	0.283778	0.15641	1.81558	0.0694346	0.363068	0.0694346	0.363068	215.456	200.302	163.607	151.137
ENSCSAG00000010243	WDR20	WD repeat domain 20	112.752	0.283257	0.166436	1.70249	0.0886628	0.410161	0.0886628	0.410161	132.146	128.849	86.0642	103.95
ENSCSAG00000004232	CPSF6	cleavage and polyadenylation specific factor 6	426.082	0.283233	0.138136	2.05084	0.0402821	0.277934	0.0402821	0.277934	458.203	497.826	385.159	363.14
ENSCSAG00000001506	TRMT13	tRNA methyltransferase 13 homolog	35.1787	0.283008	0.167016	1.69646	0.0897994	NA	0.0897994	1	45.9639	42.1688	23.8594	28.7229
ENSCSAG00000001470	EVI5		303.135	0.282979	0.148889	1.90073	0.0573375	0.329495	0.0573375	0.329495	300.202	384.204	264.158	263.977
ENSCSAG00000017225	KATNA1		83.5544	0.282879	0.169933	1.66559	0.0957952	NA	0.0957952	1	93.3642	101.908	69.8739	69.0717
ENSCSAG00000005911	INTS2	integrator complex subunit 2	231.517	0.282378	0.151433	1.86538	0.0621283	0.343007	0.0621283	0.343007	248.492	275.268	208.77	193.538
ENSCSAG00000011274	TFEB	transcription factor EB	17.1942	0.282301	0.145447	1.95484	0.0506024	NA	0.0506024	1	18.6728	29.2839	11.9297	8.89042
ENSCSAG00000011572	CUL7	cullin 7	200.912	0.282113	0.157062	1.79783	0.0722037	0.370806	0.0722037	0.370806	251.365	206.158	187.467	158.66
ENSCSAG00000009472	MLLT3		137.479	0.282072	0.162339	1.73893	0.0820468	0.39594	0.0820468	0.39594	166.619	148.762	117.593	116.943
ENSCSAG00000010365	SRRM2	serine/arginine repetitive matrix 2	595.184	0.282025	0.133195	2.11759	0.0342101	0.254644	0.0342101	0.254644	621.949	709.841	518.942	530.006
ENSCSAG00000012289	CDK5RAP1	CDK5 regulatory subunit associated protein 1	83.6161	0.281885	0.170793	1.65289	0.0983533	NA	0.0983533	1	97.6733	98.3938	80.9515	57.4458
ENSCSAG00000015992	RNF180		96.3165	0.281752	0.168486	1.67325	0.0942789	0.42285	0.0942789	0.42285	116.346	107.765	74.9867	86.1687
ENSCSAG00000002727	TRPM4		77.9674	0.281638	0.17084	1.65103	0.0987324	NA	0.0987324	1	97.6733	85.5089	69.8739	58.8136
ENSCSAG00000003502	BCO1	beta-carotene oxygenase 1	42.663	0.281627	0.168856	1.66744	0.0954275	NA	0.0954275	1	51.7094	53.8823	24.7115	40.3488
ENSCSAG00000008818	CHRDL1	chordin like 1	284.074	0.281379	0.148604	1.89384	0.0582461	0.331763	0.0582461	0.331763	324.62	317.437	224.108	270.132
ENSCSAG00000017019	RANBP2		711.114	0.281229	0.129069	2.17911	0.0293232	0.233957	0.0293232	0.233957	768.459	819.948	608.414	647.633
ENSCSAG00000013591	ASPM		306.468	0.281188	0.156326	1.79833	0.0721251	0.370703	0.0721251	0.370703	311.693	385.376	215.587	313.216
ENSCSAG00000017684	ATP7B		36.4277	0.28116	0.167698	1.67864	0.0932222	NA	0.0932222	1	47.4003	43.3401	25.5636	29.4068
ENSCSAG00000015261	ZNF638	zinc finger protein 638	362.353	0.280744	0.141973	1.97813	0.0479145	0.301948	0.0479145	0.301948	399.311	414.659	336.588	298.855
ENSCSAG00000001344	ITGB3BP		139.385	0.280648	0.162891	1.72366	0.0847688	0.403561	0.0847688	0.403561	166.619	153.447	108.219	129.253
ENSCSAG00000008704	RFX3	regulatory factor X3	50.7056	0.280356	0.171229	1.6378	0.101464	NA	0.101464	1	53.1457	69.1099	40.9018	39.665
ENSCSAG00000013102	PELP1	proline, glutamate and leucine rich protein 1	173.974	0.280341	0.159885	1.75471	0.0793082	0.389583	0.0793082	0.389583	193.91	202.644	168.72	130.621
ENSCSAG00000013590			590.711	0.279988	0.131308	2.13276	0.0329443	0.248565	0.0329443	0.248565	659.295	660.644	536.836	506.07
ENSCSAG00000011368			300.53	0.279793	0.149247	1.87586	0.0606751	0.337279	0.0606751	0.337279	356.22	322.122	290.573	233.203
ENSCSAG00000005765			399.268	0.279673	0.140977	1.98403	0.0472526	0.300168	0.0472526	0.300168	412.239	483.769	346.813	354.249
ENSCSAG00000001248	STIL		111.046	0.279585	0.167275	1.67144	0.0946351	0.42285	0.0946351	0.42285	123.528	133.534	81.8036	105.317
ENSCSAG00000014034	TRA2B	transformer 2 beta homolog	726.016	0.279565	0.129264	2.16296	0.0305444	0.238129	0.0305444	0.238129	800.059	821.119	609.267	673.62
ENSCSAG00000003467	ERF	ETS2 repressor factor	114.638	0.279446	0.1663	1.68223	0.0925247	0.419049	0.0925247	0.419049	146.51	118.307	97.9939	95.743
ENSCSAG00000016078	MCM9	minichromosome maintenance 9 homologous recombination repair factor	36.1206	0.279256	0.167038	1.67506	0.093923	NA	0.093923	1	51.7094	38.6547	24.7115	29.4068
ENSCSAG00000017255	MYO10		191.922	0.278936	0.156181	1.78659	0.0740039	0.375202	0.0740039	0.375202	201.092	234.271	172.981	159.344
ENSCSAG00000007403	BICD1	BICD cargo adaptor 1	92.8335	0.278835	0.168641	1.65471	0.097983	0.42843	0.097983	0.42843	107.728	107.765	79.2473	76.5944
ENSCSAG00000017034	CRTC3	CREB regulated transcription coactivator 3	210.696	0.278524	0.156369	1.78119	0.0748809	0.376998	0.0748809	0.376998	226.947	251.841	160.199	203.796
ENSCSAG00000007701			103.81	0.278385	0.169293	1.64451	0.100072	0.431608	0.100072	0.431608	124.964	117.135	69.8739	103.266
ENSCSAG00000011844	PHTF2	putative homeodomain transcription factor 2	101.491	0.278361	0.16964	1.64002	0.101001	0.433538	0.101001	0.433538	100.546	135.877	72.4303	97.1108
ENSCSAG00000014935	APC	APC regulator of WNT signaling pathway	165.274	0.278328	0.16076	1.73123	0.0834104	0.398593	0.0834104	0.398593	172.365	204.987	127.818	155.924
ENSCSAG00000008018	ABCC1	ATP binding cassette subfamily C member 1	553.737	0.277649	0.133531	2.0797	0.0375534	0.268172	0.0375534	0.268172	597.531	639.559	508.716	469.141
ENSCSAG00000012678		melanoma-associated antigen D4	123.392	0.277609	0.165386	1.68058	0.0928441	0.419186	0.0928441	0.419186	155.128	128.849	112.48	97.1108
ENSCSAG00000003648	NR2C1	nuclear receptor subfamily 2 group C member 1	161.326	0.277487	0.162179	1.71073	0.0871316	0.408963	0.0871316	0.408963	156.564	212.015	130.375	146.35
ENSCSAG00000014813	SAMD4A	sterile alpha motif domain containing 4A	450.57	0.277396	0.136587	2.03141	0.0422136	0.2858	0.0422136	0.2858	492.675	515.396	409.87	384.34
ENSCSAG00000012438	ARAP3		87.8062	0.277288	0.169894	1.6341	0.102238	0.434135	0.102238	0.434135	114.91	90.1943	71.5782	74.5428
ENSCSAG00000000790	MTOR	mechanistic target of rapamycin kinase	248.501	0.277215	0.15028	1.84493	0.0650482	0.351209	0.0650482	0.351209	265.729	295.181	205.361	227.732
ENSCSAG00000002115	ACAD8	acyl-CoA dehydrogenase family member 8	77.8313	0.277151	0.171	1.62351	0.10448	NA	0.10448	1	101.982	80.8234	69.0218	59.4974
ENSCSAG00000006410	AOPEP		54.251	0.2771	0.171523	1.61804	0.105653	NA	0.105653	1	63.2003	66.7672	49.423	37.6133
ENSCSAG00000018115	IFT88	intraflagellar transport 88	31.7227	0.276951	0.165248	1.67851	0.0932484	NA	0.0932484	1	38.782	40.9974	23.8594	23.2519
ENSCSAG00000016354	PARP1		212.798	0.276527	0.154569	1.79033	0.0734016	0.37468	0.0734016	0.37468	249.929	231.928	201.101	168.234
ENSCSAG00000014120	DIP2C	disco interacting protein 2 homolog C	56.9289	0.276472	0.171757	1.61143	0.107086	NA	0.107086	1	68.9458	66.7672	46.8667	45.136
ENSCSAG00000001505	SASS6	SAS-6 centriolar assembly protein	118.648	0.27644	0.165408	1.6717	0.0945835	0.42285	0.0945835	0.42285	133.583	139.391	92.8812	108.737
ENSCSAG00000009005	PPP6R3	protein phosphatase 6 regulatory subunit 3	883.426	0.276415	0.128329	2.1541	0.0312325	0.240438	0.0312325	0.240438	975.296	994.48	726.859	837.067
ENSCSAG00000005781	HDLBP		1913.68	0.276398	0.118449	2.33365	0.0196138	0.190491	0.0196138	0.190491	2213.45	2038.16	1670.16	1732.95
ENSCSAG00000008523	TMEM87A	transmembrane protein 87A	85.0723	0.276319	0.170818	1.61696	0.105887	NA	0.105887	1	90.4914	108.936	58.7964	82.0654
ENSCSAG00000014568	MCTP1		42.6682	0.276185	0.169602	1.62828	0.103466	NA	0.103466	1	44.5275	59.7391	31.5285	34.8778
ENSCSAG00000015701			11.5186	0.276128	0.13091	2.14029	0.0323316	NA	0.0323316	1	17.2365	17.5703	5.11273	6.15491
ENSCSAG00000009338	BARD1	BRCA1 associated RING domain 1	198.003	0.276047	0.161804	1.70549	0.088104	0.409982	0.088104	0.409982	198.219	254.184	140.6	199.009
ENSCSAG00000008649	MORC3	MORC family CW-type zinc finger 3	167.204	0.275867	0.159046	1.73482	0.0827718	0.39644	0.0827718	0.39644	183.856	196.788	132.931	155.24
ENSCSAG00000000476			1082.89	0.2758	0.132518	2.08162	0.037377	0.267516	0.037377	0.267516	1358.81	1060.08	948.411	964.269
ENSCSAG00000011049	CRBN	cereblon	78.9747	0.275739	0.17042	1.61928	0.105386	NA	0.105386	1	91.9278	92.537	66.4654	64.9685
ENSCSAG00000014911	MCC	MCC regulator of WNT signaling pathway	79.0811	0.2756	0.171	1.61429	0.106464	NA	0.106464	1	96.2369	89.0229	74.9867	56.0781
ENSCSAG00000012680	PHC3	polyhomeotic homolog 3	103.067	0.275581	0.168733	1.63312	0.102443	0.434329	0.102443	0.434329	99.1096	139.391	86.9163	86.8526
ENSCSAG00000006974	ZNF484		167.747	0.275542	0.163892	1.68069	0.0928239	0.419186	0.0928239	0.419186	173.801	210.844	116.741	169.602
ENSCSAG00000006394	DCAF15	DDB1 and CUL4 associated factor 15	113.266	0.275532	0.166428	1.65748	0.0974216	0.427906	0.0974216	0.427906	137.892	122.992	103.959	88.2203
ENSCSAG00000012538	ZNF609		86.0424	0.275519	0.169622	1.62582	0.103988	0.438039	0.103988	0.438039	100.546	99.5651	74.9867	69.0717
ENSCSAG00000005918	LETMD1	LETM1 domain containing 1	278.893	0.275469	0.154184	1.78648	0.0740217	0.375202	0.0740217	0.375202	300.202	331.493	202.805	281.074
ENSCSAG00000011582	GTF3C3	general transcription factor IIIC subunit 3	127.642	0.275257	0.16386	1.68036	0.0928873	0.419186	0.0928873	0.419186	136.455	155.79	108.219	110.104
ENSCSAG00000014215	SEMA7A		44.9368	0.275167	0.170315	1.61912	0.105422	NA	0.105422	1	58.8912	50.3682	38.3454	32.1423
ENSCSAG00000006841	NSRP1		89.8019	0.274509	0.169097	1.62424	0.104325	0.438583	0.104325	0.438583	100.546	107.765	74.9867	75.9105
ENSCSAG00000001819	ZNF26	zinc finger protein 26	19.6008	0.274485	0.151633	1.81649	0.0692957	NA	0.0692957	1	25.8547	26.9411	11.9297	13.6776
ENSCSAG00000003809	CDC27	cell division cycle 27	571.096	0.274216	0.142238	1.92788	0.0538706	0.322188	0.0538706	0.322188	627.694	653.616	428.617	574.458
ENSCSAG00000013686	ANGPTL2	angiopoietin like 2	46.8484	0.274097	0.170795	1.60689	0.108078	NA	0.108078	1	54.5821	58.5677	40.0497	34.1939
ENSCSAG00000009098	LPP		154.483	0.274043	0.160463	1.70815	0.0876088	0.40962	0.0876088	0.40962	168.055	183.903	124.41	141.563
ENSCSAG00000014794	RNF123	ring finger protein 123	117.547	0.273985	0.165673	1.654	0.0981265	0.42863	0.0981265	0.42863	123.528	146.419	96.2897	103.95
ENSCSAG00000002340	MED13L	mediator complex subunit 13L	1110.26	0.273921	0.125106	2.18964	0.0285503	0.231472	0.0285503	0.231472	1153.41	1315.43	993.573	978.63
ENSCSAG00000010666	CLMN		50.9259	0.273889	0.170879	1.60321	0.108888	NA	0.108888	1	48.8366	73.7953	43.4582	37.6133
ENSCSAG00000008953	CHKA		369.142	0.2732	0.141084	1.93674	0.0527766	0.318928	0.0527766	0.318928	399.311	427.544	311.876	337.836
ENSCSAG00000013775	ASB3		53.9215	0.27251	0.171639	1.58862	0.112147	NA	0.112147	1	63.2003	65.5958	41.7539	45.136
ENSCSAG00000008844	USP25		314.532	0.272332	0.143556	1.89757	0.0577525	0.331113	0.0577525	0.331113	350.475	354.92	270.974	281.758
ENSCSAG00000003856	TANC2		140.691	0.272266	0.162601	1.67463	0.0940064	0.422428	0.0940064	0.422428	146.51	174.532	115.888	125.834
ENSCSAG00000004817	ANKRD17	ankyrin repeat domain 17	354.779	0.271986	0.14652	1.85635	0.063404	0.347623	0.063404	0.347623	347.602	448.629	307.616	315.268
ENSCSAG00000017931	KIAA1328		40.6278	0.27186	0.168437	1.61356	0.106623	NA	0.106623	1	38.782	60.9104	30.6764	32.1423
ENSCSAG00000000419			63.5867	0.271856	0.171746	1.58406	0.11318	NA	0.11318	1	80.4368	70.2813	46.8667	56.7619
ENSCSAG00000001598	RPS5	ribosomal protein S5	6736.94	0.271829	0.113319	2.39883	0.0164475	0.180351	0.0164475	0.180351	7809.55	7108.95	5977.63	6051.64
ENSCSAG00000013225	SNX16	sorting nexin 16	225.03	0.271805	0.162947	1.66729	0.0954566	0.424633	0.0954566	0.424633	199.656	313.923	167.016	219.525
ENSCSAG00000012001	TRMT2A	tRNA methyltransferase 2 homolog A	47.4589	0.271791	0.170733	1.59547	0.110608	NA	0.110608	1	63.2003	51.5396	40.9018	34.1939
ENSCSAG00000003153	DYNC2H1	dynein cytoplasmic 2 heavy chain 1	323.271	0.271766	0.146025	1.8612	0.0627164	0.345049	0.0627164	0.345049	333.238	392.404	269.27	298.171
ENSCSAG00000008957	UHRF2	ubiquitin like with PHD and ring finger domains 2	219.173	0.271483	0.153446	1.7705	0.0766433	0.381528	0.0766433	0.381528	264.292	230.757	201.101	180.544
ENSCSAG00000003314	NUP37	nucleoporin 37	112.145	0.271462	0.167408	1.62245	0.104707	0.439602	0.104707	0.439602	140.764	118.307	83.5079	106.001
ENSCSAG00000007261	SLC22A23		216.584	0.271152	0.152426	1.77945	0.0751654	0.377241	0.0751654	0.377241	242.747	245.984	180.65	196.957
ENSCSAG00000011579	TELO2	telomere maintenance 2	53.0459	0.271148	0.171015	1.5892	0.112015	NA	0.112015	1	79.0004	49.1969	40.9018	43.0844
ENSCSAG00000002814	NCAM1		122.637	0.27111	0.166386	1.62918	0.103275	0.436971	0.103275	0.436971	132.146	149.933	89.4727	118.995
ENSCSAG00000008069	PDE3A		55.7132	0.270932	0.17157	1.57867	0.114411	NA	0.114411	1	61.764	71.4526	38.3454	51.2909
ENSCSAG00000012225	PDE10A		75.8133	0.270915	0.170893	1.58632	0.112666	NA	0.112666	1	91.9278	85.5089	58.7964	67.0201
ENSCSAG00000006579	CPEB3	cytoplasmic polyadenylation element binding protein 3	20.3923	0.270762	0.152114	1.78631	0.0740485	NA	0.0740485	1	30.1638	24.5984	11.0776	15.7292
ENSCSAG00000015306	SHROOM2	shroom family member 2	849.035	0.270402	0.131164	2.0616	0.0392456	0.274372	0.0392456	0.274372	860.387	1029.62	728.563	777.57
ENSCSAG00000004306		RAP1B, member of RAS oncogene family	79.381	0.270393	0.170827	1.5852	0.112921	NA	0.112921	1	96.2369	89.0229	74.1345	58.1297
ENSCSAG00000007687	TLE1	TLE family member 1, transcriptional corepressor	259.214	0.270264	0.148273	1.82332	0.0682556	0.358682	0.0682556	0.358682	280.092	302.209	230.925	223.628
ENSCSAG00000003796	CEP290	centrosomal protein 290	121.424	0.270192	0.166238	1.62511	0.104139	0.438091	0.104139	0.438091	127.837	151.105	91.177	115.575
ENSCSAG00000001402	FUBP1	far upstream element binding protein 1	215.464	0.269884	0.152758	1.76725	0.0771864	0.382904	0.0771864	0.382904	241.31	244.813	178.093	197.641
ENSCSAG00000011851	AP3D1	adaptor related protein complex 3 subunit delta 1	631.602	0.269687	0.137434	1.96297	0.0496492	0.308879	0.0496492	0.308879	761.277	648.93	606.71	509.49
ENSCSAG00000012416	MAP4K3	mitogen-activated protein kinase kinase kinase kinase 3	172.562	0.269636	0.159693	1.68841	0.0913326	0.415429	0.0913326	0.415429	173.801	217.872	140.6	157.976
ENSCSAG00000009576	KIFC1	kinesin family member C1	102.328	0.269453	0.167331	1.61158	0.107054	0.444153	0.107054	0.444153	122.092	113.621	86.0642	87.5365
ENSCSAG00000017866		trafficking protein particle complex 8	315.734	0.269265	0.15059	1.78793	0.0737871	0.37468	0.0737871	0.37468	328.929	381.862	240.298	311.849
ENSCSAG00000017492	CEP192	centrosomal protein 192	362.781	0.269164	0.142201	1.89321	0.0583306	0.331763	0.0583306	0.331763	409.366	402.946	298.242	340.572
ENSCSAG00000003727	PLEKHG7		24.9442	0.269018	0.15796	1.7036	0.0884563	NA	0.0884563	1	27.2911	37.4833	14.4861	20.5164
ENSCSAG00000011302	TRPC1	transient receptor potential cation channel subfamily C member 1	226.722	0.268859	0.154699	1.7379	0.0822293	0.39594	0.0822293	0.39594	235.565	276.44	178.093	216.79
ENSCSAG00000014951	HOOK3		127.553	0.268764	0.165221	1.627	0.103736	0.437559	0.103736	0.437559	126.401	165.161	113.332	105.317
ENSCSAG00000007628	KSR1		52.5981	0.268282	0.171158	1.57032	0.11634	NA	0.11634	1	60.3276	65.5958	50.2751	34.1939
ENSCSAG00000006142	HEATR6	HEAT repeat containing 6	115.813	0.268241	0.166872	1.60736	0.107975	0.445445	0.107975	0.445445	113.473	152.276	96.2897	101.214
ENSCSAG00000015757	GPSM1	G protein signaling modulator 1	102.104	0.268172	0.16933	1.58648	0.112631	0.452981	0.112631	0.452981	132.146	104.251	98.846	73.175
ENSCSAG00000001024	PTPRU	protein tyrosine phosphatase receptor type U	64.2786	0.268094	0.171771	1.56363	0.117904	NA	0.117904	1	89.055	63.2531	52.8315	51.9748
ENSCSAG00000010445	RPL26	ribosomal protein L26	653.645	0.268023	0.140075	1.91354	0.0556792	0.325923	0.0556792	0.325923	746.913	714.526	495.934	657.207
ENSCSAG00000004844	SAP30BP	SAP30 binding protein	410.59	0.267907	0.143424	1.86882	0.0616476	0.34065	0.0616476	0.34065	485.494	433.401	397.941	325.526
ENSCSAG00000014901	MED27	mediator complex subunit 27	106.164	0.267818	0.167207	1.60326	0.108877	0.446068	0.108877	0.446068	122.092	121.821	97.9939	82.7493
ENSCSAG00000005759	EPS15L1	epidermal growth factor receptor pathway substrate 15 like 1	106.489	0.267595	0.167094	1.60177	0.109207	0.446353	0.109207	0.446353	113.473	131.192	86.9163	94.3753
ENSCSAG00000011295	LAMB1	laminin subunit beta 1	2111.92	0.267488	0.116135	2.30341	0.0212556	0.19748	0.0212556	0.19748	2364.27	2308.74	1920.68	1854
ENSCSAG00000013704	EIF4G1		983.307	0.267433	0.133117	2.00948	0.0444867	0.293807	0.0444867	0.293807	1193.62	995.651	942.446	801.506
ENSCSAG00000003496	IL15	interleukin 15	48.1647	0.267331	0.170247	1.56882	0.11669	NA	0.11669	1	47.4003	69.1099	32.3806	43.7682
ENSCSAG00000005311	CHD9	chromodomain helicase DNA binding protein 9	246.638	0.267234	0.157196	1.69959	0.0892074	0.411449	0.0892074	0.411449	235.565	322.122	190.875	237.99
ENSCSAG00000016972	RICTOR		196.7	0.267175	0.155892	1.71406	0.0865179	0.408507	0.0865179	0.408507	212.583	231.928	157.642	184.647
ENSCSAG00000001459	HFM1		51.0376	0.267065	0.171398	1.55938	0.118906	NA	0.118906	1	57.4549	64.4245	42.6061	39.665
ENSCSAG00000001468	RPAP2	RNA polymerase II associated protein 2	179.888	0.267029	0.158594	1.68373	0.092233	0.418621	0.092233	0.418621	182.419	224.9	147.417	164.815
ENSCSAG00000003267	ARHGAP42	Rho GTPase activating protein 42	90.273	0.267024	0.170155	1.56917	0.116609	0.458014	0.116609	0.458014	86.1823	122.992	76.6909	75.2267
ENSCSAG00000012807	ARHGEF3	Rho guanine nucleotide exchange factor 3	180.266	0.266984	0.159858	1.67073	0.0947752	0.422879	0.0947752	0.422879	180.983	227.243	171.276	141.563
ENSCSAG00000004641	NUP54	nucleoporin 54	124.489	0.266952	0.166084	1.60762	0.107918	0.445445	0.107918	0.445445	146.51	139.391	90.3248	121.73
ENSCSAG00000017478		ERCC excision repair 5, endonuclease	173.264	0.266861	0.160445	1.66314	0.0962846	0.426606	0.0962846	0.426606	168.055	224.9	144.861	155.24
ENSCSAG00000002790	TOP2A	DNA topoisomerase II alpha	1295.3	0.266789	0.122695	2.17456	0.0296628	0.235483	0.0296628	0.235483	1459.35	1412.65	1093.27	1215.94
ENSCSAG00000002129	NCAPD3	non-SMC condensin II complex subunit D3	287.021	0.26666	0.149561	1.78335	0.0745294	0.376335	0.0745294	0.376335	290.147	353.749	267.566	236.622
ENSCSAG00000010503	AP2A2	adaptor related protein complex 2 subunit alpha 2	696.877	0.266376	0.129065	2.06431	0.0389886	0.273179	0.0389886	0.273179	784.259	763.723	642.499	597.026
ENSCSAG00000010256	SGSM1	small G protein signaling modulator 1	67.0603	0.266334	0.17165	1.55385	0.120221	NA	0.120221	1	79.0004	78.4807	62.2048	48.5554
ENSCSAG00000008988	SKIV2L	Ski2 like RNA helicase	130.532	0.266265	0.163169	1.63311	0.102446	0.434329	0.102446	0.434329	152.255	145.248	115.888	108.737
ENSCSAG00000010117	KLF7	Kruppel like factor 7	33.8267	0.266236	0.165844	1.60722	0.108007	NA	0.108007	1	35.9093	48.0255	28.12	23.2519
ENSCSAG00000014926	TTF1		71.7064	0.266198	0.171575	1.55231	0.120588	NA	0.120588	1	71.8186	96.0511	65.6133	53.3425
ENSCSAG00000015271	UTP25	UTP25 small subunit processor component	34.7031	0.266011	0.165158	1.61652	0.105982	NA	0.105982	1	43.0911	43.3401	33.2327	19.1486
ENSCSAG00000005967	LARP4	La ribonucleoprotein 4	1549.61	0.265707	0.126174	2.10592	0.0352112	0.258148	0.0352112	0.258148	1692.05	1746.49	1249.21	1510.69
ENSCSAG00000015654	PCGF1	polycomb group ring finger 1	35.1803	0.265683	0.166896	1.59596	0.110497	NA	0.110497	1	45.9639	40.9974	29.8242	23.9358
ENSCSAG00000009220	TNXB		75.0735	0.265546	0.171486	1.55164	0.120748	NA	0.120748	1	96.2369	79.6521	72.4303	51.9748
ENSCSAG00000017764	ZC3H13	zinc finger CCCH-type containing 13	139.885	0.265424	0.162408	1.6346	0.102134	0.434091	0.102134	0.434091	150.819	167.504	113.332	127.885
ENSCSAG00000000978	RPS6KA1	ribosomal protein S6 kinase A1	154.996	0.265399	0.164406	1.61614	0.106064	0.441954	0.106064	0.441954	182.419	171.018	158.495	108.053
ENSCSAG00000015783	TNS3	tensin-3	2031.39	0.265371	0.11649	2.27816	0.0227168	0.205328	0.0227168	0.205328	2207.7	2284.14	1788.6	1845.1
ENSCSAG00000017007	CHD2	chromodomain helicase DNA binding protein 2	312.709	0.265364	0.144783	1.83361	0.0667126	0.354698	0.0667126	0.354698	350.475	349.064	291.425	259.874
ENSCSAG00000012160	CACNA2D1		48.3131	0.265363	0.171115	1.55207	0.120646	NA	0.120646	1	56.0185	59.7391	39.1976	38.2972
ENSCSAG00000017192	STXBP5	syntaxin binding protein 5	148.351	0.265349	0.162224	1.63567	0.101908	0.434091	0.101908	0.434091	152.255	185.074	119.297	136.776
ENSCSAG00000009127	CNST	consortin, connexin sorting protein	185.86	0.264518	0.156469	1.69084	0.0908665	0.414799	0.0908665	0.414799	198.219	221.386	154.234	169.602
ENSCSAG00000017690	ZNF316	zinc finger protein 316	145.153	0.26451	0.164445	1.61062	0.107262	0.444563	0.107262	0.444563	191.037	140.563	135.487	113.524
ENSCSAG00000000677	UBE2J2	ubiquitin conjugating enzyme E2 J2	125.175	0.26423	0.16703	1.58437	0.11311	0.453267	0.11311	0.453267	168.055	119.478	116.741	96.4269
ENSCSAG00000015656	LETM1	leucine zipper and EF-hand containing transmembrane protein 1	578.146	0.2642	0.134479	1.9652	0.0493911	0.307793	0.0493911	0.307793	666.476	619.646	547.062	479.399
ENSCSAG00000013430	SCAF8	SR-related CTD associated factor 8	184.887	0.263728	0.159844	1.64965	0.099014	0.429198	0.099014	0.429198	188.165	230.757	141.452	179.176
ENSCSAG00000008660	AMOT	angiomotin	68.1511	0.263549	0.171702	1.53505	0.124771	NA	0.124771	1	66.0731	93.7083	58.7964	54.0264
ENSCSAG00000007851	ITGB5	integrin subunit beta 5	443.319	0.263391	0.139377	1.89043	0.0587009	0.332201	0.0587009	0.332201	535.767	453.314	386.863	397.334
ENSCSAG00000000696	MIB2		40.1028	0.263261	0.167038	1.58314	0.11339	NA	0.11339	1	60.3276	38.6547	37.4933	23.9358
ENSCSAG00000015719	CAMSAP1		299.036	0.262868	0.144678	1.81747	0.0691459	0.362157	0.0691459	0.362157	327.493	340.864	265.862	261.926
ENSCSAG00000015755	PFKFB4	6-phosphofructo-2-kinase/fructose-2,6-biphosphatase 4	81.9407	0.262808	0.170476	1.54388	0.122618	NA	0.122618	1	104.855	85.5089	72.4303	64.9685
ENSCSAG00000007355	BUB1B	BUB1 mitotic checkpoint serine/threonine kinase B	256.888	0.262707	0.149526	1.75717	0.0788882	0.388424	0.0788882	0.388424	271.474	304.552	215.587	235.938
ENSCSAG00000009640	CLBA1	clathrin binding box of aftiphilin containing 1	29.9122	0.262627	0.163913	1.60472	0.108555	NA	0.108555	1	38.782	36.312	21.303	23.2519
ENSCSAG00000010838	PIAS4		91.3408	0.262559	0.168837	1.55627	0.119643	0.460424	0.119643	0.460424	106.291	104.251	77.543	77.2783
ENSCSAG00000015855	NYNRIN	NYN domain and retroviral integrase containing	41.8139	0.26253	0.169525	1.55077	0.120956	NA	0.120956	1	56.0185	45.6828	30.6764	34.8778
ENSCSAG00000012801	RBM25	RNA binding motif protein 25	167.431	0.26247	0.16199	1.62113	0.10499	0.439893	0.10499	0.439893	170.928	208.501	164.459	125.834
ENSCSAG00000012248	SMC4	structural maintenance of chromosomes 4	610.872	0.262293	0.134958	1.94377	0.0519231	0.316884	0.0519231	0.316884	700.949	658.301	496.787	587.452
ENSCSAG00000007305	BICC1	BicC family RNA binding protein 1	4502.93	0.262292	0.120672	2.17362	0.0297338	0.235649	0.0297338	0.235649	4652.41	5306.23	3767.23	4285.87
ENSCSAG00000015226	HOMER1	homer scaffold protein 1	564.094	0.26228	0.140764	1.8632	0.0624336	0.344092	0.0624336	0.344092	584.603	673.529	442.251	555.993
ENSCSAG00000012597	EML4	EMAP like 4	218.259	0.262134	0.152726	1.71678	0.0860201	0.407048	0.0860201	0.407048	241.31	249.498	179.798	202.428
ENSCSAG00000015766	FAM193A		163.615	0.262087	0.163218	1.60661	0.10814	0.445445	0.10814	0.445445	165.183	206.158	162.755	120.363
ENSCSAG00000011489		serine/threonine-protein phosphatase 4 regulatory subunit 2	547.337	0.261962	0.136981	1.9125	0.0558123	0.325923	0.0558123	0.325923	591.785	626.675	442.251	528.638
ENSCSAG00000003688	KIAA1109	KIAA1109 ortholog	223.312	0.261879	0.154336	1.69681	0.0897327	0.412301	0.0897327	0.412301	228.383	274.097	181.502	209.267
ENSCSAG00000009399	EXO1	exonuclease 1	140.67	0.261862	0.162021	1.61723	0.105828	0.44138	0.105828	0.44138	155.128	163.99	128.67	114.892
ENSCSAG00000012541	ITGAV	integrin subunit alpha V	3293.08	0.261582	0.123371	2.1203	0.0339807	0.25342	0.0339807	0.25342	3412.82	3874.84	2704.63	3180.04
ENSCSAG00000008456	NT5M	5',3'-nucleotidase, mitochondrial	23.7416	0.261572	0.157132	1.67105	0.0947126	NA	0.0947126	1	35.9093	25.7698	16.1903	17.097
ENSCSAG00000015059	TMEM232		30.6153	0.260829	0.161932	1.6094	0.10753	NA	0.10753	1	33.0365	44.5115	16.1903	28.7229
ENSCSAG00000016842	IWS1		340.369	0.260525	0.144882	1.79912	0.0719993	0.370703	0.0719993	0.370703	407.93	352.578	317.841	283.126
ENSCSAG00000003422	ZNF827	zinc finger protein 827	154.023	0.260418	0.163624	1.59128	0.111548	0.451809	0.111548	0.451809	143.637	206.158	129.522	136.776
ENSCSAG00000002728	GRB7	growth factor receptor bound protein 7	354.621	0.260239	0.148707	1.7511	0.0799291	0.390813	0.0799291	0.390813	438.093	356.092	345.961	278.339
ENSCSAG00000018349	KNDC1	kinase non-catalytic C-lobe domain containing 1	40.452	0.260074	0.167973	1.55211	0.120635	NA	0.120635	1	45.9639	52.7109	39.1976	23.9358
ENSCSAG00000011105	C12orf4	chromosome unknown C12orf4 homolog	188.997	0.259996	0.156859	1.65765	0.097388	0.427906	0.097388	0.427906	193.91	231.928	158.495	171.654
ENSCSAG00000016251	POLR1A	RNA polymerase I subunit A	189.488	0.259935	0.155728	1.66966	0.0949872	0.423526	0.0949872	0.423526	212.583	214.358	155.938	175.073
ENSCSAG00000011065		collagen type XV alpha 1 chain	14.4382	0.259779	0.135647	1.94637	0.0516099	NA	0.0516099	1	30.1638	11.7135	7.66909	8.20654
ENSCSAG00000005788	TEX14		129.71	0.259756	0.163783	1.58711	0.112489	0.452745	0.112489	0.452745	143.637	151.105	120.149	103.95
ENSCSAG00000017643	DIAPH3		93.8426	0.259645	0.170137	1.52617	0.126966	0.472592	0.126966	0.472592	87.6187	128.849	84.36	74.5428
ENSCSAG00000008279	TUBB	tubulin beta class I	2355.05	0.259635	0.117459	2.21048	0.0270715	0.223748	0.0270715	0.223748	2526.58	2671.86	2027.2	2194.57
ENSCSAG00000008572		DEP domain containing 5, GATOR1 subcomplex subunit	94.6033	0.259351	0.168553	1.54025	0.1235	0.466776	0.1235	0.466776	112.037	105.422	84.36	76.5944
ENSCSAG00000012573	DNMT3B		61.6077	0.259343	0.171758	1.51185	0.130572	NA	0.130572	1	73.2549	71.4526	54.5357	47.1876
ENSCSAG00000014575	MAP7D2		5.59945	0.259295	0.0993603	2.7348	0.00624185	NA	0.00624185	1	11.491	9.37083	0.852121	0.683879
ENSCSAG00000005049	CRACD		43.1442	0.259118	0.169776	1.52986	0.126052	NA	0.126052	1	57.4549	46.8542	37.4933	30.7745
ENSCSAG00000010080	EIF5	eukaryotic translation initiation factor 5	1405.65	0.259022	0.120966	2.14139	0.032243	0.245785	0.032243	0.245785	1498.14	1607.1	1222.79	1294.58
ENSCSAG00000001293	NDC1	NDC1 transmembrane nucleoporin	235.472	0.258684	0.155825	1.65999	0.0969157	0.42701	0.0969157	0.42701	252.801	277.611	175.537	235.938
ENSCSAG00000015299			50.5801	0.258669	0.171093	1.51158	0.130641	NA	0.130641	1	50.273	70.2813	40.0497	41.7166
ENSCSAG00000011272	DNAH2		24.6235	0.25863	0.158185	1.63733	0.101561	NA	0.101561	1	33.0365	30.4552	14.4861	20.5164
ENSCSAG00000008357	ADAMTS14	ADAM metallopeptidase with thrombospondin type 1 motif 14	24.4641	0.258461	0.158509	1.63417	0.102224	NA	0.102224	1	28.7274	33.9693	18.7467	16.4131
ENSCSAG00000017882	KLHL14	kelch like family member 14	152.19	0.258007	0.159961	1.6139	0.106549	0.442789	0.106549	0.442789	176.674	167.504	131.227	133.356
ENSCSAG00000011884		zinc finger protein 280D	117.779	0.257924	0.166744	1.54651	0.121981	0.464926	0.121981	0.464926	119.219	149.933	91.177	110.788
ENSCSAG00000013606	PLCB4	phospholipase C beta 4	97.5402	0.257736	0.169042	1.525	0.127258	0.472592	0.127258	0.472592	96.2369	127.678	86.9163	79.3299
ENSCSAG00000012854		ankyrin repeat and KH domain-containing protein 1	366.658	0.257559	0.140201	1.83755	0.066129	0.353617	0.066129	0.353617	410.802	405.289	319.545	330.997
ENSCSAG00000015969	CWC27	CWC27 spliceosome associated cyclophilin	100.551	0.257324	0.169376	1.51855	0.128876	0.475173	0.128876	0.475173	99.1096	132.363	74.9867	95.743
ENSCSAG00000016056	EGFR	epidermal growth factor receptor	81.1931	0.257266	0.170233	1.51246	0.130417	NA	0.130417	1	97.6733	90.1943	66.4654	70.4395
ENSCSAG00000007480	ATG2A	autophagy related 2A	191.474	0.257244	0.156458	1.64547	0.0998722	0.431608	0.0998722	0.431608	228.383	202.644	178.945	155.924
ENSCSAG00000007886	ENOX2	ecto-NOX disulfide-thiol exchanger 2	37.7983	0.257195	0.167453	1.53796	0.124059	NA	0.124059	1	53.1457	39.826	24.7115	33.5101
ENSCSAG00000012918	SIPA1L1	signal induced proliferation associated 1 like 1	266.856	0.257133	0.151641	1.69576	0.0899305	0.412618	0.0899305	0.412618	259.983	337.35	236.89	233.203
ENSCSAG00000002270	RPLP0		5472.31	0.257131	0.113379	2.26796	0.0233317	0.208208	0.0233317	0.208208	6197.94	5856.77	5076.09	4758.43
ENSCSAG00000016368	ZRANB3	zinc finger RANBP2-type containing 3	198.788	0.257131	0.156311	1.64505	0.0999605	0.431608	0.0999605	0.431608	201.092	245.984	166.164	181.912
ENSCSAG00000017897	RFC3	replication factor C subunit 3	67.7938	0.257074	0.171625	1.49761	0.134234	NA	0.134234	1	71.8186	86.6802	51.1273	61.5491
ENSCSAG00000006455	GIGYF2	GRB10 interacting GYF protein 2	204.141	0.257038	0.157138	1.63722	0.101584	0.434091	0.101584	0.434091	251.365	208.501	195.988	160.711
ENSCSAG00000005611	SCD	stearoyl-CoA desaturase	1758.6	0.256964	0.118755	2.1639	0.0304723	0.238129	0.0304723	0.238129	1878.77	2000.67	1535.52	1619.42
ENSCSAG00000014331	DAAM1	dishevelled associated activator of morphogenesis 1	112.122	0.25667	0.166436	1.54325	0.12277	0.465721	0.12277	0.465721	122.092	133.534	103.959	88.9042
ENSCSAG00000016339	LARS2	leucyl-tRNA synthetase 2, mitochondrial	149.129	0.25658	0.160928	1.59571	0.110553	0.449463	0.110553	0.449463	178.11	159.304	134.635	124.466
ENSCSAG00000006560	EEF1G	eukaryotic translation elongation factor 1 gamma	6761.63	0.25623	0.114558	2.23675	0.0253028	0.219002	0.0253028	0.219002	7461.95	7432.24	6424.14	5728.17
ENSCSAG00000014541	SCN5A		32.9466	0.256218	0.165382	1.5489	0.121405	NA	0.121405	1	35.9093	45.6828	22.1551	28.039
ENSCSAG00000001403	DNAJB4	DnaJ heat shock protein family (Hsp40) member B4	144.617	0.256199	0.16114	1.59079	0.111658	0.451809	0.111658	0.451809	168.055	159.304	121.853	129.253
ENSCSAG00000014058	MYO1C		827.53	0.255628	0.130421	1.96046	0.0499415	0.310217	0.0499415	0.310217	965.242	866.802	787.36	690.717
ENSCSAG00000008915	ZNF692	zinc finger protein 692	30.914	0.255559	0.164262	1.56031	0.118687	NA	0.118687	1	43.0911	33.9693	24.7115	21.8841
ENSCSAG00000012471	TFPI	tissue factor pathway inhibitor	215.426	0.255274	0.15672	1.62885	0.103346	0.436971	0.103346	0.436971	235.565	249.498	161.903	214.738
ENSCSAG00000015937	TRAPPC13	trafficking protein particle complex 13	57.4681	0.255197	0.17136	1.48775	0.136818	NA	0.136818	1	53.1457	83.1662	40.9018	52.6587
ENSCSAG00000004731	CNOT1	CCR4-NOT transcription complex subunit 1	2625.35	0.255175	0.11464	2.22599	0.0260149	0.220934	0.0260149	0.220934	2910.09	2870.99	2401.28	2319.03
ENSCSAG00000008611	KANK1	KN motif and ankyrin repeat domains 1	231.831	0.255101	0.150643	1.69415	0.090236	0.413114	0.090236	0.413114	267.165	251.841	201.101	207.215
ENSCSAG00000014143		ribosomal protein S27a	513.428	0.254888	0.137203	1.85783	0.063193	0.347068	0.063193	0.347068	524.276	614.961	440.547	473.928
ENSCSAG00000002202	PRDM10	PR/SET domain 10	30.4538	0.254774	0.164027	1.55633	0.119631	NA	0.119631	1	35.9093	39.826	25.5636	20.5164
ENSCSAG00000007077	PHF12	PHD finger protein 12	148.139	0.254723	0.163321	1.55946	0.118887	0.460021	0.118887	0.460021	142.201	193.273	124.41	132.672
ENSCSAG00000018301	PYGB		579.379	0.254491	0.142942	1.78108	0.0748992	0.376998	0.0748992	0.376998	683.713	605.59	587.111	441.102
ENSCSAG00000016708	SNRK	SNF related kinase	78.3182	0.254359	0.170675	1.49128	0.135888	NA	0.135888	1	94.8005	86.6802	61.3527	70.4395
ENSCSAG00000013548	LMBRD1	LMBR1 domain containing 1	137.762	0.254146	0.164846	1.54138	0.123224	0.466776	0.123224	0.466776	142.201	171.018	103.107	134.724
ENSCSAG00000010923	CABIN1	calcineurin binding protein 1	315.276	0.254132	0.146255	1.73847	0.0821284	0.39594	0.0821284	0.39594	361.966	340.864	302.503	255.771
ENSCSAG00000015184	PARD6B	par-6 family cell polarity regulator beta	501.711	0.253907	0.149185	1.70169	0.0888132	0.410161	0.0888132	0.410161	466.821	653.616	395.384	491.025
ENSCSAG00000010797	ATRX	ATRX chromatin remodeler	606.208	0.253846	0.135774	1.86965	0.0615325	0.340609	0.0615325	0.340609	624.822	719.212	503.604	577.194
ENSCSAG00000014217	ODF2	outer dense fiber of sperm tails 2	182.684	0.253826	0.158312	1.60398	0.108719	0.446068	0.108719	0.446068	188.165	222.557	172.981	147.034
ENSCSAG00000014280	YTHDF3	YTH N6-methyladenosine RNA binding protein 3	274.473	0.253727	0.152467	1.66397	0.0961186	0.426467	0.0961186	0.426467	270.038	344.378	221.551	261.926
ENSCSAG00000011896	FBXO38	F-box protein 38	194.772	0.253642	0.154412	1.64331	0.100318	0.43215	0.100318	0.43215	215.456	221.386	171.276	170.97
ENSCSAG00000009719	TSSC4		53.6822	0.253494	0.171006	1.48659	0.137122	NA	0.137122	1	79.0004	49.1969	46.8667	39.665
ENSCSAG00000010265	WASL	WASP like actin nucleation promoting factor	149.521	0.25344	0.161312	1.57136	0.1161	0.458014	0.1161	0.458014	153.692	183.903	127.818	132.672
ENSCSAG00000017040	BLM	BLM RecQ like helicase	87.0158	0.25317	0.170632	1.48323	0.138013	0.495024	0.138013	0.495024	94.8005	106.593	60.5006	86.1687
ENSCSAG00000017808	SS18	SS18 subunit of BAF chromatin remodeling complex	166.703	0.252754	0.161973	1.56027	0.118696	0.459603	0.118696	0.459603	178.11	199.13	122.705	166.866
ENSCSAG00000017920	BRCA2	BRCA2 DNA repair associated	123.737	0.252677	0.168636	1.49756	0.134247	0.486474	0.134247	0.486474	129.273	154.619	81.8036	129.253
ENSCSAG00000014259	ZBTB2	zinc finger and BTB domain containing 2	38.9293	0.252613	0.166779	1.51365	0.130115	NA	0.130115	1	33.0365	62.0818	29.8242	30.7745
ENSCSAG00000016196	NVL	nuclear VCP like	96.5533	0.252592	0.16832	1.50156	0.133211	0.483734	0.133211	0.483734	104.855	115.964	86.0642	79.3299
ENSCSAG00000006720	TAF6L	TATA-box binding protein associated factor 6 like	130.205	0.252284	0.166353	1.51869	0.12884	0.475173	0.12884	0.475173	175.237	121.821	118.445	105.317
ENSCSAG00000006529	PAXIP1		69.0864	0.2522	0.171392	1.47313	0.140716	NA	0.140716	1	83.3095	77.3094	59.6485	56.0781
ENSCSAG00000012340	POP1	POP1 homolog, ribonuclease P/MRP subunit	192.942	0.252129	0.15885	1.58872	0.112124	0.452142	0.112124	0.452142	249.929	185.074	174.685	162.079
ENSCSAG00000008402	TONSL		178.724	0.251886	0.164443	1.53386	0.125064	0.46961	0.125064	0.46961	237.001	168.675	180.65	128.569
ENSCSAG00000012941	MMP16	matrix metallopeptidase 16	28.7689	0.251828	0.161726	1.55907	0.118981	NA	0.118981	1	28.7274	43.3401	23.8594	19.1486
ENSCSAG00000005907	GBE1	1,4-alpha-glucan branching enzyme 1	178.367	0.251746	0.159492	1.57828	0.114501	0.456059	0.114501	0.456059	176.674	224.9	145.713	166.183
ENSCSAG00000008462	MCM2		238.81	0.251595	0.151578	1.66093	0.0967284	0.426975	0.0967284	0.426975	285.838	248.327	220.699	200.376
ENSCSAG00000017784	TTC39C		105.808	0.251567	0.16722	1.50607	0.132048	0.480985	0.132048	0.480985	127.837	113.621	96.2897	85.4848
ENSCSAG00000013929	PRPF8	pre-mRNA processing factor 8	1208.86	0.251409	0.126215	1.99196	0.0463758	0.298617	0.0463758	0.298617	1232.41	1434.91	1047.26	1120.88
ENSCSAG00000010106	DOCK2	dedicator of cytokinesis 2	36.8402	0.251374	0.16787	1.49989	0.133644	NA	0.133644	1	48.8366	40.9974	28.12	29.4068
ENSCSAG00000011183			49.7814	0.251342	0.171048	1.46915	0.141792	NA	0.141792	1	50.273	67.9385	39.1976	41.7166
ENSCSAG00000007161	MTM1		47.3346	0.251186	0.170201	1.47462	0.140316	NA	0.140316	1	50.273	63.2531	30.6764	45.136
ENSCSAG00000015982	DNAH6	dynein axonemal heavy chain 6	17.7591	0.251174	0.14429	1.74723	0.0805974	NA	0.0805974	1	14.3637	33.9693	11.0776	11.6259
ENSCSAG00000004685	FGFR2	fibroblast growth factor receptor 2	37.9451	0.251149	0.1678	1.49841	0.134026	NA	0.134026	1	51.7094	40.9974	25.5636	33.5101
ENSCSAG00000011870	CACNA1H	calcium voltage-gated channel subunit alpha1 H	213.502	0.251141	0.152805	1.64449	0.100074	0.431608	0.100074	0.431608	247.056	230.757	194.284	181.912
ENSCSAG00000003440	LIPE	lipase E, hormone sensitive type	47.5119	0.251074	0.169731	1.47966	0.138964	NA	0.138964	1	63.2003	51.5396	28.12	47.1876
ENSCSAG00000015337	CRHBP	corticotropin releasing hormone binding protein	5.49114	0.250845	0.0975103	2.69806	0.00697443	NA	0.00697443	1	10.0546	10.5422	0	1.36776
ENSCSAG00000012259	SEMA3A		20.2141	0.250823	0.150425	1.66912	0.0950939	NA	0.0950939	1	24.4183	29.2839	9.37333	17.7808
ENSCSAG00000017848	PROSER1	proline and serine rich 1	90.7615	0.25067	0.169059	1.48322	0.138015	0.495024	0.138015	0.495024	99.1096	108.936	74.9867	80.0138
ENSCSAG00000014953	DDX31		75.958	0.250661	0.170743	1.46919	0.14178	NA	0.14178	1	87.6187	87.8516	64.7612	63.6007
ENSCSAG00000011364			438.981	0.250596	0.144082	1.74008	0.0818448	0.395495	0.0818448	0.395495	522.839	453.314	433.73	346.043
ENSCSAG00000007801	FRMD8		354.688	0.250569	0.154011	1.62817	0.103488	0.436971	0.103488	0.436971	466.821	327.979	347.665	276.287
ENSCSAG00000006346	ADGRE5	adhesion G protein-coupled receptor E5	40.0527	0.2505	0.168881	1.48319	0.138024	NA	0.138024	1	41.6548	55.0537	30.6764	32.8262
ENSCSAG00000001868	DDX51		42.7851	0.2504	0.169729	1.47862	0.139243	NA	0.139243	1	56.0185	46.8542	37.4933	30.7745
ENSCSAG00000001902			176.114	0.250196	0.158613	1.57747	0.114687	0.456059	0.114687	0.456059	185.292	210.844	141.452	166.866
ENSCSAG00000012059	SLC6A13	solute carrier family 6 member 13	6.30048	0.250054	0.104017	2.52363	0.0116151	NA	0.0116151	1	12.9273	9.37083	0.852121	2.05164
ENSCSAG00000016702	ITGA1	integrin subunit alpha 1	467.586	0.249983	0.142588	1.75311	0.0795823	0.390324	0.0795823	0.390324	459.639	578.649	390.271	441.786
ENSCSAG00000002492			240.515	0.249831	0.160351	1.55791	0.119255	0.460186	0.119255	0.460186	275.783	267.069	162.755	256.455
ENSCSAG00000012605	NOL4L		53.41	0.2496	0.171579	1.45687	0.145154	NA	0.145154	1	67.5095	58.5677	45.1624	42.4005
ENSCSAG00000014896	ZMYND8	zinc finger MYND-type containing 8	233.702	0.249533	0.155073	1.60926	0.10756	0.445375	0.10756	0.445375	224.074	298.695	213.03	199.009
ENSCSAG00000010697	EPS8L2		273.396	0.248923	0.155009	1.6069	0.108077	0.445445	0.108077	0.445445	305.947	305.723	282.904	199.009
ENSCSAG00000017407	ZNF2		37.2873	0.248881	0.164033	1.51822	0.128958	NA	0.128958	1	28.7274	63.2531	33.2327	23.9358
ENSCSAG00000015852	SEC16A		220.151	0.248836	0.154862	1.60783	0.107873	0.445445	0.107873	0.445445	244.183	248.327	216.439	171.654
ENSCSAG00000004496	BMP2K		127.206	0.248519	0.16407	1.51506	0.129757	0.476988	0.129757	0.476988	139.328	148.762	103.107	117.627
ENSCSAG00000002352	RBM19		111.391	0.248438	0.166629	1.49215	0.13566	0.488793	0.13566	0.488793	137.892	115.964	91.177	100.53
ENSCSAG00000014316	SEMA3B	semaphorin 3B	240.558	0.24824	0.154809	1.60481	0.108535	0.446068	0.108535	0.446068	290.147	248.327	237.742	186.015
ENSCSAG00000009028	COX10	COX10, heme A:farnesyltransferase cytochrome c oxidase assembly factor	126.908	0.248153	0.165135	1.50306	0.132823	0.482848	0.132823	0.482848	146.51	141.734	96.2897	123.098
ENSCSAG00000002031	YY1AP1		138.167	0.247901	0.162043	1.53076	0.125829	0.471265	0.125829	0.471265	160.874	151.105	117.593	123.098
ENSCSAG00000002870	ACSF3	acyl-CoA synthetase family member 3	93.1698	0.247855	0.170675	1.45503	0.14566	0.506121	0.14566	0.506121	132.146	83.1662	83.5079	73.8589
ENSCSAG00000005545	LZTS2	leucine zipper tumor suppressor 2	292.931	0.247747	0.148303	1.67153	0.0946167	0.42285	0.0946167	0.42285	357.657	295.181	269.27	249.616
ENSCSAG00000007995	OSBPL11	oxysterol binding protein like 11	262.518	0.247726	0.152429	1.62522	0.104115	0.438091	0.104115	0.438091	285.838	301.038	201.953	261.242
ENSCSAG00000017611	IQCE		197.752	0.247409	0.158593	1.56153	0.118399	0.458732	0.118399	0.458732	242.747	201.473	194.284	152.505
ENSCSAG00000005403	SFXN2	sideroflexin 2	64.3393	0.247209	0.171671	1.44156	0.149426	NA	0.149426	1	74.6913	74.9667	57.0921	50.607
ENSCSAG00000017284	TRIO	trio Rho guanine nucleotide exchange factor	830.319	0.247185	0.126886	1.94829	0.0513806	0.315805	0.0513806	0.315805	925.023	905.457	713.225	777.57
ENSCSAG00000002348	CBX4	chromobox 4	87.1039	0.247031	0.170553	1.45097	0.146789	0.506121	0.146789	0.506121	117.782	83.1662	78.3951	69.0717
ENSCSAG00000012396	FKBP15	FKBP prolyl isomerase family member 15	80.0541	0.246937	0.170483	1.45027	0.146983	NA	0.146983	1	97.6733	86.6802	71.5782	64.2846
ENSCSAG00000003559	SCLT1		87.8654	0.246812	0.170776	1.44444	0.148617	0.508394	0.148617	0.508394	80.4368	121.821	69.8739	79.3299
ENSCSAG00000011532	ZNF133	zinc finger protein 133	27.8861	0.246738	0.161548	1.52825	0.126451	NA	0.126451	1	28.7274	40.9974	21.303	20.5164
ENSCSAG00000004738	MTHFD2L	methylenetetrahydrofolate dehydrogenase (NADP+ dependent) 2 like	64.027	0.246578	0.17175	1.43534	0.15119	NA	0.15119	1	66.0731	83.1662	49.423	57.4458
ENSCSAG00000009045	ADK	adenosine kinase	176.502	0.246304	0.157642	1.56307	0.118036	0.458271	0.118036	0.458271	205.401	190.931	144.861	164.815
ENSCSAG00000011378	C1orf112	chromosome unknown C1orf112 homolog	72.8003	0.246142	0.171148	1.43853	0.150285	NA	0.150285	1	80.4368	87.8516	57.9442	64.9685
ENSCSAG00000012354	USP3	ubiquitin specific peptidase 3	82.498	0.246126	0.171419	1.43472	0.151367	NA	0.151367	1	84.7459	106.593	54.5357	84.1171
ENSCSAG00000008311	ZC3H7A		132.418	0.246088	0.164544	1.49546	0.134794	0.488176	0.134794	0.488176	130.71	168.675	109.924	120.363
ENSCSAG00000001326	MYSM1	Myb like, SWIRM and MPN domains 1	82.2854	0.246072	0.170348	1.44471	0.14854	NA	0.14854	1	84.7459	104.251	69.0218	71.1234
ENSCSAG00000006369	MYO1D	myosin ID	257.437	0.24599	0.148159	1.66104	0.0967054	0.426975	0.0967054	0.426975	293.02	279.954	231.777	224.996
ENSCSAG00000016858	LRRK1	leucine rich repeat kinase 1	53.5389	0.245577	0.171596	1.43302	0.151851	NA	0.151851	1	67.5095	58.5677	44.3103	43.7682
ENSCSAG00000006607	PPP1R3C	protein phosphatase 1 regulatory subunit 3C	33.7396	0.245574	0.166479	1.47703	0.139668	NA	0.139668	1	40.2184	42.1688	27.2679	25.3035
ENSCSAG00000005591	TRIM25	tripartite motif containing 25	358.997	0.245345	0.142655	1.72024	0.0853887	0.404988	0.0853887	0.404988	374.893	420.516	334.884	305.694
ENSCSAG00000016824			115.179	0.245244	0.166565	1.47228	0.140946	0.49875	0.140946	0.49875	114.91	146.419	95.4376	103.95
ENSCSAG00000017086	LIMCH1		730.311	0.245217	0.127938	1.91689	0.0552521	0.324587	0.0552521	0.324587	784.259	824.633	644.204	668.149
ENSCSAG00000012106	APBB1IP	amyloid beta precursor protein binding family B member 1 interacting protein	9.30428	0.244871	0.121443	2.06506	0.0389174	NA	0.0389174	1	15.8001	12.8849	5.11273	3.41939
ENSCSAG00000008882	MORC2	MORC family CW-type zinc finger 2	125.17	0.244788	0.163961	1.49374	0.135245	0.48849	0.135245	0.48849	143.637	139.391	104.811	112.84
ENSCSAG00000004449		ribosomal protein L27a	3116.89	0.244613	0.120436	2.03119	0.0422354	0.2858	0.0422354	0.2858	3579.44	3269.25	3003.73	2615.15
ENSCSAG00000014010	BCOR	BCL6 corepressor	95.2499	0.244488	0.169384	1.44301	0.149019	0.508394	0.149019	0.508394	94.8005	122.992	74.9867	88.2203
ENSCSAG00000013861	FAM135A	family with sequence similarity 135 member A	203.806	0.244477	0.159727	1.53025	0.125954	0.471265	0.125954	0.471265	209.71	248.327	149.973	207.215
ENSCSAG00000016469	TAPT1		105.511	0.244442	0.168621	1.44911	0.147308	0.506521	0.147308	0.506521	104.855	135.877	80.0994	101.214
ENSCSAG00000012606	LAMC1		486.453	0.244374	0.13556	1.80323	0.071352	0.369733	0.071352	0.369733	563.058	511.882	441.399	429.476
ENSCSAG00000016630	PTPN4	protein tyrosine phosphatase non-receptor type 4	423.956	0.244122	0.142688	1.71086	0.0871068	0.408963	0.0871068	0.408963	425.166	514.225	353.63	402.805
ENSCSAG00000012301	PMS1	PMS1 homolog 1, mismatch repair system component	88.6345	0.24406	0.170717	1.42878	0.153066	0.51513	0.153066	0.51513	90.4914	113.621	62.2048	88.2203
ENSCSAG00000010551		ribosomal protein lateral stalk subunit P2	1608.43	0.244058	0.170959	1.42872	0.153084	0.51513	0.153084	0.51513	2124.39	1584.84	1582.39	1142.08
ENSCSAG00000000788	EXOSC10		85.7557	0.244044	0.170068	1.43492	0.151309	NA	0.151309	1	87.6187	108.936	69.8739	76.5944
ENSCSAG00000017640	TDRD3	tudor domain containing 3	151.883	0.243994	0.160224	1.52358	0.127613	0.473013	0.127613	0.473013	175.237	166.332	127.818	138.143
ENSCSAG00000002309	MYH14		115.017	0.243989	0.166903	1.46379	0.143252	0.501302	0.143252	0.501302	147.946	113.621	104.811	93.6914
ENSCSAG00000004884	CCDC102A		167.445	0.243861	0.165326	1.47716	0.139633	0.496889	0.139633	0.496889	228.383	151.105	164.459	125.834
ENSCSAG00000009080	NUP205		174.929	0.243771	0.158244	1.54062	0.123408	0.466776	0.123408	0.466776	182.419	209.672	144.861	162.763
ENSCSAG00000002060	GON4L		174.106	0.243719	0.157545	1.54739	0.12177	0.464678	0.12177	0.464678	191.037	199.13	144.861	161.395
ENSCSAG00000010329	GABRA1	gamma-aminobutyric acid type A receptor subunit alpha1	138.243	0.243482	0.164891	1.47627	0.13987	0.496889	0.13987	0.496889	130.71	181.56	114.184	126.518
ENSCSAG00000013129	UMAD1		21.5214	0.243314	0.14896	1.63428	0.1022	NA	0.1022	1	24.4183	32.7979	7.66909	21.2002
ENSCSAG00000010964	PPP4R4	protein phosphatase 4 regulatory subunit 4	112.851	0.243124	0.166846	1.4571	0.145089	0.505545	0.145089	0.505545	119.219	137.048	87.7685	107.369
ENSCSAG00000013985		Rap guanine nucleotide exchange factor 6	98.7766	0.243068	0.168573	1.44182	0.149354	0.508864	0.149354	0.508864	103.419	121.821	77.543	92.3236
ENSCSAG00000017873	RNF138	ring finger protein 138	215.597	0.24306	0.154017	1.57863	0.114421	0.456059	0.114421	0.456059	249.929	231.928	174.685	205.847
ENSCSAG00000007197	IPPK	inositol-pentakisphosphate 2-kinase	72.4017	0.242967	0.171723	1.41911	0.155868	NA	0.155868	1	107.728	62.0818	69.8739	49.9231
ENSCSAG00000019491	FAM200A	family with sequence similarity 200 member A	19.7433	0.24294	0.145625	1.67092	0.0947381	NA	0.0947381	1	14.3637	38.6547	10.2255	15.7292
ENSCSAG00000013950	KLHL7	kelch like family member 7	157.688	0.242924	0.160461	1.51414	0.12999	0.476988	0.12999	0.476988	159.437	194.445	138.044	138.827
ENSCSAG00000017926	FRY	FRY microtubule binding protein	467.795	0.242918	0.141058	1.72209	0.0850526	0.404067	0.0850526	0.404067	475.439	559.907	385.159	450.676
ENSCSAG00000001274	CC2D1B	coiled-coil and C2 domain containing 1B	96.3561	0.242745	0.169273	1.43623	0.150936	0.512396	0.150936	0.512396	120.655	99.5651	92.0291	73.175
ENSCSAG00000015499	UTP15	UTP15 small subunit processome component	71.9937	0.242645	0.171416	1.41529	0.156983	NA	0.156983	1	77.5641	89.0229	53.6836	67.704
ENSCSAG00000001967	AACS	acetoacetyl-CoA synthetase	207.717	0.242593	0.154994	1.56588	0.117377	0.458271	0.117377	0.458271	219.765	243.642	198.544	168.918
ENSCSAG00000012549	DHX9	DExH-box helicase 9	557.129	0.242507	0.132808	1.8262	0.0678206	0.357979	0.0678206	0.357979	594.658	633.703	486.561	513.593
ENSCSAG00000012320	DHX57	DExH-box helicase 57	169.014	0.242495	0.163368	1.484	0.13781	0.494849	0.13781	0.494849	150.819	229.585	146.565	149.086
ENSCSAG00000009408	RPS6	ribosomal protein S6	5046.77	0.242413	0.124786	1.94273	0.052049	0.316884	0.052049	0.316884	6028.45	5067.28	4907.37	4183.97
ENSCSAG00000015165	EFL1	elongation factor like GTPase 1	221.882	0.242047	0.152833	1.58478	0.113016	0.453267	0.113016	0.453267	262.856	231.928	205.361	187.383
ENSCSAG00000011910	PHF23	PHD finger protein 23	198.09	0.242038	0.157919	1.5341	0.125004	0.46961	0.125004	0.46961	247.056	196.788	189.171	159.344
ENSCSAG00000017483	TPP2	tripeptidyl peptidase 2	126.817	0.241954	0.166829	1.45101	0.146778	0.506121	0.146778	0.506121	160.874	127.678	92.8812	125.834
ENSCSAG00000006658	ZNF564		33.9348	0.241817	0.166634	1.45293	0.146244	NA	0.146244	1	41.6548	40.9974	26.4158	26.6713
ENSCSAG00000008847	SMTN	smoothelin	33.6706	0.241712	0.164786	1.47282	0.1408	NA	0.1408	1	48.8366	33.9693	30.6764	21.2002
ENSCSAG00000006581	KMT2C	lysine methyltransferase 2C	265.284	0.241618	0.150498	1.60555	0.108372	0.446068	0.108372	0.446068	262.856	326.808	233.481	237.99
ENSCSAG00000004279		HECT and RLD domain containing E3 ubiquitin protein ligase 3	29.1825	0.24143	0.161888	1.49273	0.135509	NA	0.135509	1	40.2184	32.7979	17.0424	26.6713
ENSCSAG00000007954	ZNF184		109.844	0.24142	0.166414	1.45126	0.146707	0.506121	0.146707	0.506121	116.346	132.363	96.2897	94.3753
ENSCSAG00000016767	CKAP2L	cytoskeleton associated protein 2 like	133.926	0.24117	0.16597	1.45254	0.146352	0.506121	0.146352	0.506121	132.146	171.018	100.55	131.989
ENSCSAG00000003847	TLK2	tousled like kinase 2	379.842	0.241078	0.140036	1.72182	0.0851013	0.404067	0.0851013	0.404067	405.057	434.572	332.327	347.41
ENSCSAG00000011595	MITF	melanocyte inducing transcription factor	199.337	0.240651	0.157855	1.5244	0.127408	0.472794	0.127408	0.472794	209.71	236.614	153.382	197.641
ENSCSAG00000017324			18.3704	0.240545	0.147847	1.63902	0.101209	NA	0.101209	1	30.1638	18.7417	13.6339	10.9421
ENSCSAG00000014606	XPO1	exportin 1	846.891	0.240436	0.138093	1.74109	0.0816682	0.395042	0.0816682	0.395042	902.041	968.71	651.02	865.79
ENSCSAG00000010764	ING3	inhibitor of growth family member 3	33.6261	0.240409	0.164543	1.45949	0.144431	NA	0.144431	1	35.9093	46.8542	19.5988	32.1423
ENSCSAG00000008000	ABCC6	ATP binding cassette subfamily C member 6	25.2529	0.240403	0.157051	1.53328	0.125207	NA	0.125207	1	22.9819	40.9974	21.303	15.7292
ENSCSAG00000002999	CHST11	carbohydrate sulfotransferase 11	82.0346	0.24026	0.170335	1.41078	0.158309	NA	0.158309	1	84.7459	103.079	69.8739	70.4395
ENSCSAG00000003488			50.0196	0.240196	0.170471	1.40873	0.158915	NA	0.158915	1	44.5275	73.7953	43.4582	38.2972
ENSCSAG00000005384	CNNM2	cyclin and CBS domain divalent metal cation transport mediator 2	68.1884	0.240188	0.171561	1.4	0.161513	NA	0.161513	1	74.6913	83.1662	51.9794	62.9168
ENSCSAG00000010457	TBC1D22B	TBC1 domain family member 22B	56.9073	0.239986	0.171685	1.3975	0.162263	NA	0.162263	1	61.764	71.4526	41.7539	52.6587
ENSCSAG00000008190	EHD4	EH domain containing 4	308.985	0.239932	0.144177	1.66471	0.0959707	0.42611	0.0959707	0.42611	351.911	332.665	270.974	280.39
ENSCSAG00000016335	TRMT11	tRNA methyltransferase 11 homolog	27.4392	0.23988	0.161712	1.4848	0.137596	NA	0.137596	1	34.4729	33.9693	18.7467	22.568
ENSCSAG00000012604	PEX1	peroxisomal biogenesis factor 1	116.495	0.239877	0.165366	1.45102	0.146775	0.506121	0.146775	0.506121	124.964	138.22	98.846	103.95
ENSCSAG00000014105	BCR		184.676	0.239853	0.156062	1.53786	0.124084	0.468089	0.124084	0.468089	209.71	202.644	170.424	155.924
ENSCSAG00000005417	N4BP1		181.041	0.239658	0.157387	1.5229	0.127784	0.473271	0.127784	0.473271	186.728	217.872	153.382	166.183
ENSCSAG00000008332	EPS8	epidermal growth factor receptor pathway substrate 8	629.02	0.239339	0.140599	1.70217	0.0887232	0.410161	0.0887232	0.410161	611.894	777.779	516.385	610.02
ENSCSAG00000008362	XAB2	XPA binding protein 2	88.12	0.239122	0.169848	1.40982	0.158593	0.524525	0.158593	0.524525	107.728	93.7083	82.6557	68.3879
ENSCSAG00000018042	TNFRSF19	TNF receptor superfamily member 19	862.178	0.239108	0.131745	1.81494	0.0695334	0.363071	0.0695334	0.363071	869.005	1028.45	731.972	819.287
ENSCSAG00000016943	BUB1	BUB1 mitotic checkpoint serine/threonine kinase	266.431	0.239057	0.15071	1.58622	0.11269	0.452981	0.11269	0.452981	277.22	315.094	215.587	257.822
ENSCSAG00000006627			65.3644	0.239026	0.171739	1.39414	0.163276	NA	0.163276	1	87.6187	64.4245	55.3879	54.0264
ENSCSAG00000009555	DENND3	DENN domain containing 3	52.3589	0.238534	0.170753	1.39977	0.161581	NA	0.161581	1	77.5641	46.8542	39.1976	45.8199
ENSCSAG00000004217			57.2216	0.23852	0.171518	1.38963	0.164641	NA	0.164641	1	53.1457	80.8234	44.3103	50.607
ENSCSAG00000003762	METTL14	methyltransferase like 14	51.1394	0.238501	0.171444	1.39257	0.163749	NA	0.163749	1	60.3276	59.7391	43.4582	41.0327
ENSCSAG00000016665	CCN2	cellular communication network factor 2	20.9588	0.238316	0.153855	1.55365	0.120267	NA	0.120267	1	25.8547	28.1125	16.1903	13.6776
ENSCSAG00000008594	MCU		316.262	0.238127	0.14644	1.62624	0.103899	0.437956	0.103899	0.437956	316.002	384.204	280.348	284.494
ENSCSAG00000014412	MTX2	metaxin 2	155.906	0.237823	0.159392	1.4927	0.135515	0.488775	0.135515	0.488775	170.928	178.046	137.191	137.46
ENSCSAG00000014242	PABPC1L		10.9929	0.237772	0.127995	1.88971	0.0587964	NA	0.0587964	1	15.8001	16.399	7.66909	4.10327
ENSCSAG00000016966	NPHP1	nephrocystin 1	57.7345	0.237765	0.171749	1.3844	0.166237	NA	0.166237	1	63.2003	71.4526	44.3103	51.9748
ENSCSAG00000002855	USP30	ubiquitin specific peptidase 30	44.1621	0.237699	0.170328	1.39677	0.162482	NA	0.162482	1	54.5821	50.3682	34.0848	37.6133
ENSCSAG00000009524	RGS7	regulator of G protein signaling 7	29.3571	0.237669	0.162363	1.46305	0.143453	NA	0.143453	1	33.0365	39.826	17.8945	26.6713
ENSCSAG00000005028	SELENOO		108.004	0.237467	0.16856	1.41104	0.158233	0.524432	0.158233	0.524432	137.892	107.765	105.663	80.6977
ENSCSAG00000012696	PTCHD4		62.7491	0.237461	0.171742	1.38405	0.166344	NA	0.166344	1	70.3822	74.9667	57.0921	48.5554
ENSCSAG00000003793	NARS2		97.2669	0.237337	0.16833	1.41024	0.158468	0.524474	0.158468	0.524474	106.291	114.793	78.3951	89.5881
ENSCSAG00000012203	PWWP3A	PWWP domain containing 3A, DNA repair factor	194.63	0.237148	0.156692	1.51465	0.129862	0.476988	0.129862	0.476988	226.947	207.33	188.319	155.924
ENSCSAG00000004597	SHROOM3	shroom family member 3	230.15	0.237146	0.151204	1.56872	0.116714	0.458014	0.116714	0.458014	244.183	267.069	199.396	209.951
ENSCSAG00000010379	ZNF384		200.754	0.237109	0.156507	1.51508	0.129753	0.476988	0.129753	0.476988	196.783	250.67	176.389	179.176
ENSCSAG00000001256	BEND5	BEN domain containing 5	16.0855	0.236949	0.14302	1.67101	0.0947204	NA	0.0947204	1	27.2911	16.399	11.0776	9.5743
ENSCSAG00000018184	RELCH	RAB11 binding and LisH domain, coiled-coil and HEAT repeat containing	128.233	0.236936	0.163559	1.44916	0.147293	0.506521	0.147293	0.506521	142.201	146.419	107.367	116.943
ENSCSAG00000004818	DPY19L3	dpy-19 like C-mannosyltransferase 3	92.8278	0.236881	0.168978	1.40225	0.160842	0.527825	0.160842	0.527825	96.2369	114.793	80.9515	79.3299
ENSCSAG00000009267	DLG5	discs large MAGUK scaffold protein 5	1150.41	0.236852	0.124229	1.9068	0.0565459	0.327925	0.0565459	0.327925	1249.64	1273.26	1100.09	978.63
ENSCSAG00000017169	FANCI		177.445	0.236775	0.160542	1.47459	0.140323	0.498219	0.140323	0.498219	180.983	216.701	136.339	175.757
ENSCSAG00000000842			22.933	0.236742	0.156863	1.51309	0.130258	NA	0.130258	1	30.1638	28.1125	17.0424	16.4131
ENSCSAG00000014388	FANCL	FA complementation group L	80.4286	0.236681	0.171232	1.38137	0.167164	NA	0.167164	1	74.6913	110.107	63.057	73.8589
ENSCSAG00000017282		cytoplasmic polyadenylation element binding protein 1	63.9856	0.236645	0.17169	1.37883	0.167948	NA	0.167948	1	73.2549	74.9667	50.2751	57.4458
ENSCSAG00000011960	PRICKLE2	prickle planar cell polarity protein 2	96.1117	0.236593	0.168723	1.4033	0.160529	0.527323	0.160529	0.527323	103.419	114.793	90.3248	75.9105
ENSCSAG00000017072	NSUN7		51.7321	0.236555	0.171504	1.38036	0.167477	NA	0.167477	1	60.3276	60.9104	42.6061	43.0844
ENSCSAG00000017454	SENP6		311.318	0.236325	0.149939	1.57636	0.114942	0.456108	0.114942	0.456108	359.093	332.665	240.298	313.216
ENSCSAG00000005418	CAT	catalase	271.92	0.236045	0.148508	1.58989	0.11186	0.451809	0.11186	0.451809	311.693	291.667	225.812	258.506
ENSCSAG00000017488	FAM210A	family with sequence similarity 210 member A	266.915	0.235816	0.152688	1.54433	0.122509	0.465721	0.122509	0.465721	254.238	338.521	230.073	244.829
ENSCSAG00000015396	PLEKHA2	pleckstrin homology domain containing A2	517.976	0.235775	0.134291	1.7559	0.0791057	0.38889	0.0791057	0.38889	553.003	586.849	449.92	482.134
ENSCSAG00000010196	PHF20		233.393	0.235772	0.150474	1.56759	0.116976	0.458014	0.116976	0.458014	261.42	256.527	213.882	201.744
ENSCSAG00000006917	SSH2	slingshot protein phosphatase 2	120.628	0.235762	0.165631	1.42338	0.154625	0.517901	0.154625	0.517901	122.092	149.933	99.6982	110.788
ENSCSAG00000003202	RAPGEF2		178.66	0.235638	0.159318	1.47895	0.139155	0.496889	0.139155	0.496889	185.292	214.358	140.6	174.389
ENSCSAG00000006517	HERC2	HECT and RLD domain containing E3 ubiquitin protein ligase 2	354.138	0.235532	0.148687	1.58482	0.113007	0.453267	0.113007	0.453267	390.693	393.575	362.151	270.132
ENSCSAG00000008200	HMOX1	heme oxygenase 1	231.784	0.235495	0.152618	1.544	0.122589	0.465721	0.122589	0.465721	264.292	250.67	224.108	188.067
ENSCSAG00000002819	IL18	interleukin 18	57.5742	0.235396	0.171694	1.37265	0.169862	NA	0.169862	1	76.1277	58.5677	44.3103	51.2909
ENSCSAG00000001352	DNAJC6	DnaJ heat shock protein family (Hsp40) member C6	806.761	0.235044	0.135473	1.73495	0.0827492	0.39644	0.0827492	0.39644	818.732	956.996	655.281	796.035
ENSCSAG00000002305	TAOK3	TAO kinase 3	50.1582	0.235026	0.171239	1.37244	0.169926	NA	0.169926	1	54.5821	63.2531	38.3454	44.4521
ENSCSAG00000014670	OLA1		241.249	0.235025	0.153688	1.52915	0.126226	0.471727	0.126226	0.471727	248.492	288.153	191.727	236.622
ENSCSAG00000015278	SYT14		51.6186	0.23483	0.171069	1.37188	0.170101	NA	0.170101	1	56.0185	65.5958	34.937	49.9231
ENSCSAG00000013970	FNIP1	folliculin interacting protein 1	291.998	0.234768	0.149717	1.56801	0.116879	0.458014	0.116879	0.458014	288.711	358.434	244.559	276.287
ENSCSAG00000012442	MTERF3	mitochondrial transcription termination factor 3	45.6698	0.234673	0.170567	1.37812	0.168167	NA	0.168167	1	58.8912	49.1969	38.3454	36.2456
ENSCSAG00000005666	MYO9B		417.503	0.234591	0.144784	1.62105	0.105007	0.439893	0.105007	0.439893	486.93	435.744	418.391	328.946
ENSCSAG00000017278	TMEM131	transmembrane protein 131	222.322	0.234583	0.155133	1.51204	0.130524	0.477355	0.130524	0.477355	225.51	269.411	178.945	215.422
ENSCSAG00000016613	ARL15		58.8625	0.23456	0.171776	1.3666	0.171752	NA	0.171752	1	67.5095	69.1099	50.2751	48.5554
ENSCSAG00000001471	RPL5		1945.08	0.234553	0.13657	1.71772	0.085847	0.406553	0.085847	0.406553	2414.54	1868.31	1947.1	1550.35
ENSCSAG00000012590	KIF12	kinesin family member 12	37.4166	0.234531	0.167923	1.39984	0.161561	NA	0.161561	1	50.273	39.826	31.5285	28.039
ENSCSAG00000016217	GJA1		387.495	0.234409	0.144753	1.61935	0.105371	0.440637	0.105371	0.440637	402.184	454.485	311.024	382.288
ENSCSAG00000001474	MTF2	metal response element binding transcription factor 2	285.258	0.234243	0.146234	1.60236	0.109076	0.446146	0.109076	0.446146	307.384	323.294	264.158	246.196
ENSCSAG00000003951		heterogeneous nuclear ribonucleoprotein L	1024.43	0.234157	0.124865	1.87555	0.0607176	0.337279	0.0607176	0.337279	1183.57	1062.42	927.108	924.604
ENSCSAG00000015963			155.541	0.234132	0.160379	1.46025	0.144222	0.50414	0.144222	0.50414	173.801	174.532	126.114	147.718
ENSCSAG00000002242		calcium binding protein 1	21.5935	0.234092	0.154923	1.51428	0.129954	NA	0.129954	1	25.8547	29.2839	16.1903	15.0453
ENSCSAG00000018121	DTX2	deltex E3 ubiquitin ligase 2	43.2354	0.234048	0.169944	1.37854	0.168037	NA	0.168037	1	47.4003	55.0537	38.3454	32.1423
ENSCSAG00000005061	GMIP		22.6921	0.233998	0.155076	1.51563	0.129612	NA	0.129612	1	35.9093	22.2557	16.1903	16.4131
ENSCSAG00000012501	CDK14	cyclin dependent kinase 14	332.997	0.233991	0.143037	1.63617	0.101803	0.434091	0.101803	0.434091	360.529	374.833	285.461	311.165
ENSCSAG00000004442	MKI67	marker of proliferation Ki-67	422.811	0.233952	0.143105	1.63478	0.102095	0.434091	0.102095	0.434091	416.548	516.567	358.743	399.385
ENSCSAG00000003463	MPP3	membrane palmitoylated protein 3	38.4259	0.233934	0.166185	1.40969	0.158633	NA	0.158633	1	57.4549	36.312	23.0073	36.9294
ENSCSAG00000011321	U2SURP	U2 snRNP associated SURP domain containing	300.126	0.233922	0.144632	1.61776	0.105715	0.44138	0.105715	0.44138	324.62	338.521	265.862	271.5
ENSCSAG00000003376	PRMT9	protein arginine methyltransferase 9	44.5391	0.233908	0.170089	1.37494	0.16915	NA	0.16915	1	44.5275	60.9104	35.7891	36.9294
ENSCSAG00000018237	ZNF516	zinc finger protein 516	67.77	0.233867	0.171732	1.36419	0.172507	NA	0.172507	1	80.4368	76.138	67.3176	47.1876
ENSCSAG00000015397	POLK	DNA polymerase kappa	95.103	0.233636	0.169367	1.37919	0.167835	0.537667	0.167835	0.537667	100.546	115.964	71.5782	92.3236
ENSCSAG00000005120	BRD1	bromodomain containing 1	235.729	0.23361	0.151684	1.54104	0.123307	0.466776	0.123307	0.466776	270.038	253.013	224.96	194.905
ENSCSAG00000013706	NET1	neuroepithelial cell transforming 1	138.088	0.233458	0.164229	1.42143	0.155192	0.518974	0.155192	0.518974	147.946	162.818	104.811	136.776
ENSCSAG00000011191	TBL3	transducin beta like 3	126.541	0.233373	0.165406	1.41262	0.157767	0.524259	0.157767	0.524259	155.128	130.02	121.853	99.1624
ENSCSAG00000015478	ALMS1	ALMS1 centrosome and basal body associated protein	278.303	0.233351	0.148097	1.57588	0.115054	0.456108	0.115054	0.456108	282.965	332.665	247.967	249.616
ENSCSAG00000018798	HTD2		42.4709	0.233228	0.169759	1.37418	0.169387	NA	0.169387	1	44.5275	56.225	34.937	34.1939
ENSCSAG00000014108	MPP6	membrane palmitoylated protein 6	92.7061	0.232807	0.169934	1.37045	0.170545	0.540791	0.170545	0.540791	113.473	98.3938	67.3176	91.6397
ENSCSAG00000011444	SCYL3	SCY1 like pseudokinase 3	51.2208	0.23257	0.170816	1.36534	0.172147	NA	0.172147	1	70.3822	50.3682	48.5709	35.5617
ENSCSAG00000014049	CSPP1		77.8794	0.23242	0.170757	1.36119	0.173452	NA	0.173452	1	83.3095	94.8797	62.2048	71.1234
ENSCSAG00000006240	DDX23	DEAD-box helicase 23	447.202	0.232368	0.141001	1.64868	0.0992136	0.429654	0.0992136	0.429654	531.457	454.485	429.469	373.398
ENSCSAG00000011228	OGT	O-linked N-acetylglucosamine (GlcNAc) transferase	523.809	0.232087	0.135807	1.70917	0.0874197	0.409404	0.0874197	0.409404	537.203	613.79	487.413	456.831
ENSCSAG00000014063	WDR37	WD repeat domain 37	78.0682	0.232035	0.170591	1.36106	0.173493	NA	0.173493	1	91.9278	86.6802	63.9091	69.7556
ENSCSAG00000004843	KIFC3		657.465	0.231936	0.141528	1.6394	0.101129	0.433658	0.101129	0.433658	824.477	625.503	634.83	545.051
ENSCSAG00000018423	GPRIN2	G protein regulated inducer of neurite outgrowth 2	72.3765	0.231891	0.171167	1.35636	0.174985	NA	0.174985	1	87.6187	78.4807	63.9091	59.4974
ENSCSAG00000012428	NFKBIE		34.539	0.231845	0.166302	1.39803	0.162105	NA	0.162105	1	47.4003	36.312	29.8242	24.6196
ENSCSAG00000014689	SP3		664.791	0.231816	0.142382	1.62799	0.103528	0.436971	0.103528	0.436971	650.676	815.263	525.759	667.466
ENSCSAG00000014672	USP20	ubiquitin specific peptidase 20	56.4432	0.231802	0.171387	1.35602	0.175093	NA	0.175093	1	74.6913	57.3964	55.3879	38.2972
ENSCSAG00000008717	EIF4ENIF1	eukaryotic translation initiation factor 4E nuclear import factor 1	159.817	0.231563	0.159372	1.45397	0.145956	0.506121	0.145956	0.506121	189.601	167.504	140.6	141.563
ENSCSAG00000007120	TCAF1	TRPM8 channel associated factor 1	107.185	0.231312	0.167994	1.37834	0.1681	0.537936	0.1681	0.537936	119.219	122.992	106.515	80.0138
ENSCSAG00000010875	MED30	mediator complex subunit 30	154.217	0.231147	0.160093	1.44474	0.14853	0.508394	0.14853	0.508394	170.928	173.36	144.008	128.569
ENSCSAG00000012057	MYO1B	myosin IB	432.654	0.231122	0.13921	1.6604	0.0968339	0.426975	0.0968339	0.426975	465.384	487.283	362.151	415.798
ENSCSAG00000008410	LUC7L2	putative RNA-binding protein Luc7-like 2	289.334	0.231101	0.145406	1.58981	0.111878	0.451809	0.111878	0.451809	313.129	325.636	260.749	257.822
ENSCSAG00000015188	ARMC2	armadillo repeat containing 2	36.1641	0.230973	0.167688	1.37943	0.167763	NA	0.167763	1	45.9639	40.9974	28.9721	28.7229
ENSCSAG00000002721	ATF6	activating transcription factor 6	145.111	0.230852	0.165621	1.39342	0.163492	0.531613	0.163492	0.531613	153.692	173.36	102.255	151.137
ENSCSAG00000004037			8.79481	0.230757	0.1195	1.96605	0.0492926	NA	0.0492926	1	12.9273	14.0563	3.40848	4.78715
ENSCSAG00000003231	CLASRP		25.0575	0.230687	0.158885	1.45679	0.145173	NA	0.145173	1	35.9093	26.9411	19.5988	17.7808
ENSCSAG00000002109	FOXK2		184.935	0.230426	0.15725	1.46652	0.142507	0.500666	0.142507	0.500666	219.765	192.102	174.685	153.189
ENSCSAG00000009694	BMPR1A	bone morphogenetic protein receptor type 1A	2643.25	0.230412	0.170388	1.35488	0.175456	0.545631	0.175456	0.545631	2928.76	3316.1	1592.61	2735.51
ENSCSAG00000012015	RNF111	ring finger protein 111	128.584	0.230042	0.169058	1.35958	0.173962	0.544141	0.173962	0.544141	113.473	178.046	92.8812	129.937
ENSCSAG00000010898	TDRD7	tudor domain containing 7	79.9806	0.229879	0.170666	1.34716	0.17793	NA	0.17793	1	80.4368	101.908	69.8739	67.704
ENSCSAG00000015332	PRPF39	pre-mRNA processing factor 39	99.2605	0.229803	0.167916	1.36984	0.170737	0.540791	0.170737	0.540791	119.219	105.422	86.9163	85.4848
ENSCSAG00000016870	SAP130		186.593	0.229701	0.15546	1.47813	0.139372	0.496889	0.139372	0.496889	202.528	212.015	167.016	164.815
ENSCSAG00000016157	TP53BP2	tumor protein p53 binding protein 2	252.997	0.229667	0.149025	1.54151	0.123192	0.466776	0.123192	0.466776	278.656	281.125	215.587	236.622
ENSCSAG00000004418			43.856	0.229639	0.16962	1.35374	0.175818	NA	0.175818	1	41.6548	62.0818	37.4933	34.1939
ENSCSAG00000008784	VARS1	valyl-tRNA synthetase 1	352.782	0.229586	0.146541	1.56756	0.116983	0.458014	0.116983	0.458014	435.221	344.378	330.623	300.907
ENSCSAG00000010417	DIAPH2		76.3371	0.229337	0.171774	1.3337	0.182302	NA	0.182302	1	60.3276	115.964	61.3527	67.704
ENSCSAG00000017693	INTS6	integrator complex subunit 6	95.664	0.229329	0.168232	1.36396	0.172581	0.541897	0.172581	0.541897	106.291	110.107	83.5079	82.7493
ENSCSAG00000015715	TGFB2	transforming growth factor beta 2	505.941	0.22931	0.149541	1.53316	0.125237	0.469974	0.125237	0.469974	471.13	647.759	395.384	509.49
ENSCSAG00000010424			111.529	0.229308	0.168663	1.3614	0.173387	0.543617	0.173387	0.543617	129.273	122.992	115.888	77.9622
ENSCSAG00000001968	PBXIP1	PBX homeobox interacting protein 1	87.9354	0.229251	0.170826	1.34466	0.178734	0.548691	0.178734	0.548691	119.219	81.9948	83.5079	67.0201
ENSCSAG00000006674	ZNF44	zinc finger protein 44	64.9418	0.229243	0.171641	1.3362	0.181483	NA	0.181483	1	74.6913	74.9667	51.9794	58.1297
ENSCSAG00000012944	SESTD1	SEC14 and spectrin domain containing 1	468.904	0.229222	0.146727	1.56206	0.118275	0.458532	0.118275	0.458532	433.784	600.905	397.088	443.837
ENSCSAG00000012261	CEP350	centrosomal protein 350	297.704	0.229205	0.147394	1.55516	0.119908	0.460632	0.119908	0.460632	298.765	358.434	260.749	272.868
ENSCSAG00000004231	ARSG	arylsulfatase G	27.1195	0.229193	0.161314	1.42398	0.154453	NA	0.154453	1	33.0365	33.9693	23.0073	18.4647
ENSCSAG00000001345	EFCAB7	EF-hand calcium binding domain 7	43.2944	0.229095	0.170149	1.34827	0.177572	NA	0.177572	1	53.1457	49.1969	36.6412	34.1939
ENSCSAG00000017370	SNX14		68.9458	0.229038	0.171556	1.3348	0.181942	NA	0.181942	1	71.8186	86.6802	53.6836	63.6007
ENSCSAG00000010597	ZFAND3	zinc finger AN1-type containing 3	466.258	0.228786	0.138393	1.65324	0.0982815	0.42863	0.0982815	0.42863	482.621	542.337	396.236	443.837
ENSCSAG00000011959	UBR5		1364.52	0.228777	0.120187	1.90361	0.056961	0.328894	0.056961	0.328894	1450.74	1529.79	1221.94	1255.6
ENSCSAG00000003844	PITX2	paired like homeodomain 2	40.7992	0.228728	0.169301	1.35177	0.176448	NA	0.176448	1	50.273	46.8542	29.8242	36.2456
ENSCSAG00000001444	PKN2	protein kinase N2	324.484	0.228703	0.143826	1.59037	0.111751	0.451809	0.111751	0.451809	338.984	376.005	285.461	297.487
ENSCSAG00000007455	JMJD1C		103.505	0.228589	0.169762	1.34561	0.178428	0.548018	0.178428	0.548018	100.546	134.706	74.1345	104.633
ENSCSAG00000010429		chromodomain helicase DNA binding protein 4	2733.34	0.228554	0.118599	1.92721	0.0539535	0.322188	0.0539535	0.322188	3147.09	2821.79	2391.05	2573.44
ENSCSAG00000003257	GUCY1B1	guanylate cyclase 1 soluble subunit beta 1	153.523	0.228529	0.165331	1.38153	0.167116	0.536397	0.167116	0.536397	142.201	202.644	116.741	152.505
ENSCSAG00000016267	PTCD3	pentatricopeptide repeat domain 3	520.199	0.228528	0.141603	1.61397	0.106534	0.442789	0.106534	0.442789	587.476	558.736	407.314	527.27
ENSCSAG00000003562	JADE1	jade family PHD finger 1	488.684	0.228496	0.135609	1.68533	0.0919246	0.417521	0.0919246	0.417521	524.276	548.194	460.997	421.269
ENSCSAG00000008371		structural maintenance of chromosomes 5	218.854	0.228489	0.15706	1.45454	0.145796	0.506121	0.145796	0.506121	219.765	267.069	170.424	218.157
ENSCSAG00000015814	NOVA1	NOVA alternative splicing regulator 1	48.2188	0.228426	0.171018	1.33587	0.181593	NA	0.181593	1	54.5821	58.5677	36.6412	43.0844
ENSCSAG00000004018	SLC12A4	solute carrier family 12 member 4	74.0856	0.228405	0.17126	1.33569	0.18165	NA	0.18165	1	96.2369	73.7953	64.7612	61.5491
ENSCSAG00000013395	USP6NL	USP6 N-terminal like	209.533	0.228342	0.154668	1.47642	0.139831	0.496889	0.139831	0.496889	215.456	249.498	175.537	197.641
ENSCSAG00000006561	TNRC6A	trinucleotide repeat containing adaptor 6A	329.702	0.228038	0.148838	1.53206	0.125507	0.470706	0.125507	0.470706	344.729	384.204	258.193	331.681
ENSCSAG00000013604			29.7106	0.227948	0.163713	1.39446	0.16318	NA	0.16318	1	38.782	33.9693	22.1551	23.9358
ENSCSAG00000016452	PPP3CC		93.5312	0.227934	0.169421	1.34656	0.178123	0.547347	0.178123	0.547347	100.546	111.279	91.177	71.1234
ENSCSAG00000005526	TTC17	tetratricopeptide repeat domain 17	149.599	0.227822	0.162888	1.39872	0.161898	0.529644	0.161898	0.529644	166.619	168.675	113.332	149.769
ENSCSAG00000005988	APPBP2	amyloid beta precursor protein binding protein 2	679.613	0.227739	0.141571	1.60853	0.107718	0.445445	0.107718	0.445445	672.222	823.462	536.836	685.93
ENSCSAG00000011662	MTPAP	mitochondrial poly(A) polymerase	115.555	0.227669	0.167012	1.36286	0.172926	0.542442	0.172926	0.542442	116.346	144.077	90.3248	111.472
ENSCSAG00000000244			700.682	0.227019	0.130786	1.73609	0.0825487	0.396271	0.0825487	0.396271	805.804	729.754	605.858	661.311
ENSCSAG00000005093	E2F8	E2F transcription factor 8	70.0444	0.226995	0.171557	1.32269	0.185939	NA	0.185939	1	71.8186	89.0229	53.6836	65.6524
ENSCSAG00000008340	TXNDC11	thioredoxin domain containing 11	140.956	0.226775	0.161741	1.40304	0.160606	0.527323	0.160606	0.527323	165.183	149.933	123.558	125.15
ENSCSAG00000011574	ARSI	arylsulfatase family member I	38.9028	0.226696	0.168358	1.34975	0.177097	NA	0.177097	1	53.1457	39.826	33.2327	29.4068
ENSCSAG00000011390	PLSCR1	phospholipid scramblase 1	32.3994	0.226635	0.164706	1.37487	0.169171	NA	0.169171	1	33.0365	45.6828	22.1551	28.7229
ENSCSAG00000006578	HOOK2	hook microtubule tethering protein 2	68.403	0.226514	0.171738	1.32146	0.18635	NA	0.18635	1	94.8005	63.2531	58.7964	56.7619
ENSCSAG00000017911	C18orf21	chromosome unknown C18orf21 homolog	47.8149	0.226465	0.170852	1.32765	0.184295	NA	0.184295	1	63.2003	49.1969	39.1976	39.665
ENSCSAG00000011628	ZEB1	zinc finger E-box binding homeobox 1	105.509	0.226365	0.16754	1.35128	0.176606	0.546934	0.176606	0.546934	116.346	121.821	82.6557	101.214
ENSCSAG00000011387	CCDC88C	coiled-coil domain containing 88C	83.8797	0.226149	0.169921	1.33138	0.183062	NA	0.183062	1	93.3642	97.2224	69.0218	75.9105
ENSCSAG00000016880	MAP7	microtubule associated protein 7	96.5692	0.226078	0.168545	1.34189	0.179632	0.549455	0.179632	0.549455	112.037	106.593	76.6909	90.9559
ENSCSAG00000007363	PKP2	plakophilin 2	273.877	0.226068	0.149249	1.51482	0.129819	0.476988	0.129819	0.476988	272.911	331.493	242.854	248.248
ENSCSAG00000008912	KIAA2026	KIAA2026 ortholog	161.93	0.225939	0.159227	1.41924	0.155829	0.519653	0.155829	0.519653	169.492	190.931	138.896	148.402
ENSCSAG00000019699	HS3ST1	heparan sulfate-glucosamine 3-sulfotransferase 1	23.8848	0.225921	0.155904	1.44837	0.147514	NA	0.147514	1	21.5456	38.6547	16.1903	19.1486
ENSCSAG00000008223	PELI3	pellino E3 ubiquitin protein ligase family member 3	76.9677	0.225448	0.171775	1.31592	0.188202	NA	0.188202	1	114.91	63.2531	71.5782	58.1297
ENSCSAG00000006740	KIF20B	kinesin family member 20B	256.405	0.225422	0.152194	1.48114	0.13857	0.496169	0.13857	0.496169	270.038	297.524	203.657	254.403
ENSCSAG00000004250	RRM1	ribonucleotide reductase catalytic subunit M1	373.501	0.225305	0.145165	1.55218	0.12062	0.462524	0.12062	0.462524	412.239	411.145	296.538	374.082
ENSCSAG00000011480	THOP1		101.667	0.225243	0.169018	1.33428	0.182113	0.552661	0.182113	0.552661	114.91	114.793	103.107	73.8589
ENSCSAG00000010001	MN1	MN1 proto-oncogene, transcriptional regulator	35.8428	0.224905	0.166681	1.34846	0.177511	NA	0.177511	1	34.4729	51.5396	27.2679	30.0907
ENSCSAG00000016719	PSD3	pleckstrin and Sec7 domain containing 3	141.72	0.224874	0.161362	1.39437	0.163206	0.531175	0.163206	0.531175	158.001	158.133	126.966	123.782
ENSCSAG00000008139	APOL5		27.1025	0.224746	0.159179	1.41519	0.157013	NA	0.157013	1	27.2911	39.826	25.5636	15.7292
ENSCSAG00000004998	FOXJ1	forkhead box J1	166.428	0.224662	0.163685	1.37428	0.169354	0.540726	0.169354	0.540726	216.892	155.79	164.459	128.569
ENSCSAG00000011604	KLC4	kinesin light chain 4	48.6064	0.224598	0.171139	1.31315	0.189132	NA	0.189132	1	57.4549	56.225	38.3454	42.4005
ENSCSAG00000003971	SYT1		256.159	0.224553	0.150247	1.49467	0.135	0.488483	0.135	0.488483	258.547	306.895	223.256	235.938
ENSCSAG00000013691			30.8548	0.224404	0.164129	1.36718	0.17157	NA	0.17157	1	31.6002	43.3401	23.8594	24.6196
ENSCSAG00000009282	BNC2	basonuclin 2	68.5618	0.22411	0.171772	1.30352	0.192397	NA	0.192397	1	61.764	96.0511	52.8315	63.6007
ENSCSAG00000016827	ERCC3	ERCC excision repair 3, TFIIH core complex helicase subunit	225.942	0.224047	0.152528	1.46919	0.141782	0.500309	0.141782	0.500309	229.819	269.411	206.213	198.325
ENSCSAG00000015224	QRICH1	glutamine rich 1	117.198	0.223958	0.166064	1.34883	0.177392	0.547055	0.177392	0.547055	116.346	146.419	104.811	101.214
ENSCSAG00000016879	BCL2L11		40.5037	0.223896	0.169382	1.32352	0.185662	NA	0.185662	1	50.273	45.6828	33.2327	32.8262
ENSCSAG00000008142	PARN	poly(A)-specific ribonuclease	165.541	0.22378	0.158319	1.41389	0.157395	0.523299	0.157395	0.523299	178.11	189.759	143.156	151.137
ENSCSAG00000003674	NUMBL		44.1486	0.223643	0.170274	1.31494	0.18853	NA	0.18853	1	56.0185	48.0255	34.937	37.6133
ENSCSAG00000001531	PRPF38B	pre-mRNA processing factor 38B	150.614	0.223612	0.16077	1.39163	0.164036	0.532261	0.164036	0.532261	176.674	159.304	126.966	139.511
ENSCSAG00000002162	MYBPC2	myosin binding protein C2	19.5459	0.223536	0.151745	1.47624	0.13988	NA	0.13988	1	24.4183	25.7698	13.6339	14.3615
ENSCSAG00000014408	PAPOLG	poly(A) polymerase gamma	163.417	0.223488	0.162874	1.37169	0.17016	0.540791	0.17016	0.540791	155.128	209.672	129.522	159.344
ENSCSAG00000002573	ACAD10	acyl-CoA dehydrogenase family member 10	52.9478	0.223455	0.17133	1.30585	0.191603	NA	0.191603	1	57.4549	65.5958	51.1273	37.6133
ENSCSAG00000003691	DLG2		340.614	0.223269	0.145957	1.53049	0.125894	0.471265	0.125894	0.471265	402.184	347.892	330.623	281.758
ENSCSAG00000002706	TUBB3		26.1104	0.223267	0.160379	1.39339	0.163502	NA	0.163502	1	33.0365	31.6266	17.8945	21.8841
ENSCSAG00000013248	SMAD6	SMAD family member 6	194.256	0.223231	0.159776	1.39818	0.162059	0.529654	0.162059	0.529654	212.583	219.043	201.101	144.298
ENSCSAG00000013293	FAM13B	family with sequence similarity 13 member B	230.921	0.223123	0.153433	1.45423	0.145881	0.506121	0.145881	0.506121	226.947	283.468	201.953	211.319
ENSCSAG00000009580	CTDSPL2	CTD small phosphatase like 2	152.529	0.22311	0.162579	1.37246	0.169921	0.54079	0.169921	0.54079	172.365	168.675	115.888	153.189
ENSCSAG00000006946	RPS7	ribosomal protein S7	1172.03	0.223081	0.121402	1.83772	0.0661034	0.353617	0.0661034	0.353617	1274.06	1281.46	1089.01	1043.6
ENSCSAG00000005473		cyclic AMP-dependent transcription factor ATF-7	57.6081	0.223069	0.17154	1.30114	0.19321	NA	0.19321	1	56.0185	77.3094	55.3879	41.7166
ENSCSAG00000004829	HSPA12A	heat shock protein family A (Hsp70) member 12A	1028.29	0.223068	0.12985	1.71791	0.0858129	0.406553	0.0858129	0.406553	1083.02	1165.5	847.008	1017.61
ENSCSAG00000009760	KIF26A		87.2326	0.223007	0.170946	1.30679	0.191284	0.564218	0.191284	0.564218	122.092	77.3094	74.9867	74.5428
ENSCSAG00000002516	NAA25	N-alpha-acetyltransferase 25, NatB auxiliary subunit	207.738	0.22297	0.153153	1.45636	0.145292	0.505578	0.145292	0.505578	231.256	228.414	179.798	191.486
ENSCSAG00000005826	TAMALIN	trafficking regulator and scaffold protein tamalin	27.9046	0.222942	0.161796	1.38145	0.167141	NA	0.167141	1	34.4729	33.9693	24.7115	18.4647
ENSCSAG00000004285			50.8699	0.222917	0.17133	1.30137	0.193131	NA	0.193131	1	58.8912	59.7391	38.3454	46.5037
ENSCSAG00000001465	BTBD8		27.6828	0.222875	0.160084	1.39056	0.164359	NA	0.164359	1	28.7274	39.826	16.1903	25.9874
ENSCSAG00000014374	CCDC85A		22.7432	0.222832	0.153944	1.44748	0.147764	NA	0.147764	1	28.7274	29.2839	11.0776	21.8841
ENSCSAG00000003625	TMEM135	transmembrane protein 135	192.793	0.222702	0.164554	1.35259	0.176187	0.545904	0.176187	0.545904	165.183	265.897	149.973	190.118
ENSCSAG00000011066	TJP3		25.3162	0.222457	0.157647	1.41839	0.156078	NA	0.156078	1	38.782	24.5984	22.1551	15.7292
ENSCSAG00000012551	WDR90		22.2426	0.222379	0.155524	1.43477	0.151351	NA	0.151351	1	31.6002	24.5984	17.0424	15.7292
ENSCSAG00000002564	DDX6	DEAD-box helicase 6	433.83	0.222043	0.142696	1.55613	0.119678	0.460424	0.119678	0.460424	471.13	482.598	345.961	435.631
ENSCSAG00000003489	INPP4B		88.822	0.222031	0.169676	1.3085	0.190705	0.564091	0.190705	0.564091	93.3642	107.765	70.726	83.4332
ENSCSAG00000009971	NFX1	nuclear transcription factor, X-box binding 1	94.1143	0.221842	0.169351	1.30971	0.190294	0.56393	0.190294	0.56393	91.9278	120.649	78.3951	85.4848
ENSCSAG00000001497	PLPPR5	phospholipid phosphatase related 5	281.682	0.221794	0.15255	1.4537	0.14603	0.506121	0.14603	0.506121	274.347	347.892	227.516	276.971
ENSCSAG00000007457	PAK1IP1	PAK1 interacting protein 1	62.5002	0.221787	0.171742	1.29154	0.196516	NA	0.196516	1	67.5095	76.138	50.2751	56.0781
ENSCSAG00000018006	CENPJ	centromere protein J	48.0343	0.221787	0.171045	1.29723	0.194551	NA	0.194551	1	56.0185	56.225	37.4933	42.4005
ENSCSAG00000004504	IPO7	importin 7	1921.63	0.221645	0.130704	1.69576	0.089932	0.412618	0.089932	0.412618	1929.05	2271.26	1557.68	1928.54
ENSCSAG00000007509	MFNG	MFNG O-fucosylpeptide 3-beta-N-acetylglucosaminyltransferase	20.4215	0.221597	0.152956	1.45323	0.146161	NA	0.146161	1	28.7274	23.4271	14.4861	15.0453
ENSCSAG00000005869	CLTC		3631.38	0.221533	0.116913	1.89488	0.0581082	0.331763	0.0581082	0.331763	3746.06	4158.31	3199.71	3421.44
ENSCSAG00000010121	SPDL1	spindle apparatus coiled-coil protein 1	210.636	0.221239	0.154737	1.43079	0.15249	0.514561	0.15249	0.514561	255.674	210.844	193.431	182.596
ENSCSAG00000018158	NEDD4L		207.708	0.221194	0.154946	1.4281	0.153263	0.515247	0.153263	0.515247	215.456	243.642	199.396	172.337
ENSCSAG00000008843	PARP10	poly(ADP-ribose) polymerase family member 10	33.1745	0.221178	0.165043	1.34367	0.179056	NA	0.179056	1	48.8366	31.6266	25.5636	26.6713
ENSCSAG00000015560		dynactin subunit 1	333.63	0.221105	0.144215	1.53385	0.125066	0.46961	0.125066	0.46961	380.638	352.578	319.545	281.758
ENSCSAG00000015431	TTC6	tetratricopeptide repeat domain 6	37.4965	0.220964	0.16582	1.33142	0.18305	NA	0.18305	1	30.1638	59.7391	30.6764	29.4068
ENSCSAG00000015838	RBPMS	RNA binding protein, mRNA processing factor	95.012	0.220914	0.168574	1.31178	0.189595	0.562914	0.189595	0.562914	114.91	99.5651	83.5079	82.0654
ENSCSAG00000019054			506.792	0.220905	0.140858	1.56887	0.116678	0.458014	0.116678	0.458014	584.603	527.109	507.864	407.592
ENSCSAG00000002553	ALDH16A1	aldehyde dehydrogenase 16 family member A1	68.8452	0.220679	0.171177	1.29367	0.195778	NA	0.195778	1	101.982	58.5677	72.4303	42.4005
ENSCSAG00000012316	PTBP3	polypyrimidine tract binding protein 3	1099.81	0.220599	0.138037	1.59802	0.110038	0.448301	0.110038	0.448301	1067.22	1342.37	881.093	1108.57
ENSCSAG00000013228	ICA1	islet cell autoantigen 1	40.9612	0.220595	0.169479	1.30311	0.192536	NA	0.192536	1	47.4003	49.1969	35.7891	31.4584
ENSCSAG00000008187	ZNF16		75.6783	0.220581	0.171281	1.28934	0.197279	NA	0.197279	1	83.3095	89.0229	74.9867	55.3942
ENSCSAG00000017128	GNPDA2	glucosamine-6-phosphate deaminase 2	74.2388	0.220478	0.171044	1.28925	0.19731	NA	0.19731	1	77.5641	91.3656	63.057	64.9685
ENSCSAG00000001635	RSBN1	round spermatid basic protein 1	166.378	0.22039	0.160865	1.3699	0.17072	0.540791	0.17072	0.540791	172.365	197.959	130.375	164.815
ENSCSAG00000017567	MICALL2	MICAL like 2	47.0745	0.220099	0.168613	1.30843	0.190726	NA	0.190726	1	50.273	60.9104	51.1273	25.9874
ENSCSAG00000004060			97.1021	0.219708	0.16915	1.29866	0.194059	0.566887	0.194059	0.566887	103.419	115.964	73.2824	95.743
ENSCSAG00000016909			591.556	0.219667	0.150655	1.45867	0.144656	0.505098	0.144656	0.505098	798.623	507.196	518.09	542.316
ENSCSAG00000001110	GNL2	G protein nucleolar 2	163.427	0.219655	0.158686	1.38458	0.166182	0.534792	0.166182	0.534792	175.237	187.417	140.6	150.453
ENSCSAG00000017837	ELF1	E74 like ETS transcription factor 1	184.875	0.219655	0.158235	1.38839	0.16502	0.533649	0.16502	0.533649	180.983	228.414	172.128	157.976
ENSCSAG00000003990	ERN1	endoplasmic reticulum to nucleus signaling 1	63.9836	0.219615	0.171669	1.28001	0.200541	NA	0.200541	1	70.3822	76.138	55.3879	54.0264
ENSCSAG00000007757	KIAA0319		11.2364	0.219325	0.127299	1.73735	0.0823262	NA	0.0823262	1	10.0546	22.2557	5.11273	7.52267
ENSCSAG00000007928	BTN2A1	butyrophilin subfamily 2 member A2	157.909	0.21925	0.166593	1.31796	0.187517	0.561485	0.187517	0.561485	198.219	155.79	169.572	108.053
ENSCSAG00000006850	KANK2	KN motif and ankyrin repeat domains 2	1028.57	0.219211	0.123134	1.78048	0.0749975	0.377193	0.0749975	0.377193	1150.53	1090.53	942.446	930.759
ENSCSAG00000000679	ACAP3	ArfGAP with coiled-coil, ankyrin repeat and PH domains 3	55.1432	0.219005	0.17158	1.27778	0.201328	NA	0.201328	1	71.8186	56.225	42.6061	49.9231
ENSCSAG00000005674	DNMBP	dynamin binding protein	219.127	0.218962	0.151823	1.44289	0.14905	0.508394	0.14905	0.508394	245.62	237.785	200.248	192.854
ENSCSAG00000003293	TMEM131L	transmembrane 131 like	36.5033	0.218949	0.167618	1.30889	0.190573	NA	0.190573	1	45.9639	40.9974	32.3806	26.6713
ENSCSAG00000005874	VMP1	vacuole membrane protein 1	718.28	0.218904	0.132136	1.65672	0.0975756	0.427906	0.0975756	0.427906	716.749	851.575	654.429	650.369
ENSCSAG00000013513	DENND1A	DENN domain containing 1A	281.502	0.21883	0.146461	1.49454	0.135033	0.488483	0.135033	0.488483	298.765	319.78	259.897	247.564
ENSCSAG00000012356	DMTF1	cyclin D binding myb like transcription factor 1	63.3007	0.218814	0.17177	1.27376	0.202749	NA	0.202749	1	74.6913	71.4526	43.4582	63.6007
ENSCSAG00000001341	DOCK7	dedicator of cytokinesis 7	261.851	0.21856	0.152293	1.43502	0.151281	0.512396	0.151281	0.512396	252.801	324.465	223.256	246.88
ENSCSAG00000018024	SMAD7	SMAD family member 7	285.025	0.218545	0.149072	1.46666	0.142468	0.500666	0.142468	0.500666	305.947	320.951	282.052	231.151
ENSCSAG00000006197	TBC1D12		68.1156	0.217849	0.171625	1.27017	0.204024	NA	0.204024	1	84.7459	71.4526	51.9794	64.2846
ENSCSAG00000015159	GIN1	gypsy retrotransposon integrase 1	34.3584	0.217789	0.163281	1.33449	0.182045	NA	0.182045	1	48.8366	35.1406	17.8945	35.5617
ENSCSAG00000007229	NOL10	nucleolar protein 10	102.341	0.217734	0.168395	1.29301	0.196007	0.568372	0.196007	0.568372	113.473	117.135	77.543	101.214
ENSCSAG00000017663	GATA6	GATA binding protein 6	47.2698	0.217716	0.170699	1.27518	0.202247	NA	0.202247	1	53.1457	57.3964	34.0848	44.4521
ENSCSAG00000015367	IQGAP2	IQ motif containing GTPase activating protein 2	588.849	0.217648	0.131799	1.65168	0.0985989	0.429198	0.0985989	0.429198	666.476	619.646	524.907	544.367
ENSCSAG00000006246	ADCY6	adenylate cyclase 6	737.7	0.217272	0.135211	1.60735	0.107977	0.445445	0.107977	0.445445	860.387	752.009	731.12	607.284
ENSCSAG00000012682	RGL1		180.929	0.217177	0.156238	1.39048	0.164384	0.532458	0.164384	0.532458	193.91	206.158	160.199	163.447
ENSCSAG00000015500	RALGAPA1	Ral GTPase activating protein catalytic subunit alpha 1	376.517	0.217121	0.148053	1.46636	0.14255	0.500666	0.14255	0.500666	380.638	447.457	295.686	382.288
ENSCSAG00000006972	SGMS1	sphingomyelin synthase 1	44.6965	0.217088	0.170292	1.27473	0.202403	NA	0.202403	1	45.9639	58.5677	36.6412	37.6133
ENSCSAG00000010157	PTPN6	protein tyrosine phosphatase non-receptor type 6	73.6325	0.217079	0.171057	1.27045	0.203924	NA	0.203924	1	89.055	78.4807	64.7612	62.233
ENSCSAG00000006671	RAPGEF3		24.0815	0.216895	0.157307	1.38435	0.16625	NA	0.16625	1	33.0365	26.9411	21.303	15.0453
ENSCSAG00000008631	CHAF1B	chromatin assembly factor 1 subunit B	126.141	0.216455	0.164725	1.31516	0.188457	0.562177	0.188457	0.562177	140.764	140.563	122.705	100.53
ENSCSAG00000017995	PIAS2	protein inhibitor of activated STAT 2	104.525	0.216243	0.168912	1.27958	0.200693	0.573617	0.200693	0.573617	100.546	134.706	80.9515	101.898
ENSCSAG00000007444	NAA35	N-alpha-acetyltransferase 35, NatC auxiliary subunit	138.718	0.21622	0.163113	1.326	0.18484	0.555311	0.18484	0.555311	159.437	149.933	110.776	134.724
ENSCSAG00000007643	CCAR1	cell division cycle and apoptosis regulator 1	440.03	0.216079	0.139472	1.54934	0.1213	0.464006	0.1213	0.464006	458.203	504.854	372.377	424.689
ENSCSAG00000012401	WDR75	WD repeat domain 75	150.245	0.216037	0.161052	1.34227	0.179509	0.549455	0.179509	0.549455	179.546	154.619	128.67	138.143
ENSCSAG00000012594	WTAP		205.517	0.21602	0.154405	1.39924	0.161742	0.529644	0.161742	0.529644	209.71	243.642	180.65	188.067
ENSCSAG00000012464	CDC5L	cell division cycle 5 like	627.382	0.21589	0.12982	1.66322	0.0962686	0.426606	0.0962686	0.426606	677.967	689.928	565.808	575.826
ENSCSAG00000003500	ZNF330	zinc finger protein 330	60.7263	0.215881	0.171774	1.25896	0.208043	NA	0.208043	1	77.5641	62.0818	55.3879	47.8715
ENSCSAG00000001624			73.7365	0.215602	0.17138	1.25776	0.20848	NA	0.20848	1	70.3822	97.2224	63.057	64.2846
ENSCSAG00000004867	ADGRG1	adhesion G protein-coupled receptor G1	529.405	0.215535	0.135768	1.58802	0.112281	0.452257	0.112281	0.452257	613.331	543.508	501.899	458.883
ENSCSAG00000003176			4.41746	0.215506	0.0892979	2.5358	0.011219	NA	0.011219	1	8.61823	8.19948	0.852121	0
ENSCSAG00000016864	ASB7	ankyrin repeat and SOCS box containing 7	118.898	0.215465	0.165517	1.30211	0.19288	0.565392	0.19288	0.565392	133.583	132.363	95.4376	114.208
ENSCSAG00000018084			98.2273	0.215135	0.16862	1.27576	0.202041	0.574783	0.202041	0.574783	97.6733	122.992	82.6557	89.5881
ENSCSAG00000003362	DCLK2	doublecortin like kinase 2	119.879	0.215128	0.166686	1.29112	0.196662	0.569466	0.196662	0.569466	117.782	149.933	116.741	95.0591
ENSCSAG00000008214		ribosomal protein L8	636.564	0.214633	0.129532	1.65723	0.097472	0.427906	0.097472	0.427906	693.767	693.442	574.33	584.716
ENSCSAG00000012781	EZR		1313.42	0.214576	0.134027	1.6013	0.109311	0.446489	0.109311	0.446489	1597.25	1269.75	1295.22	1091.47
ENSCSAG00000015106	PJA2	praja ring finger ubiquitin ligase 2	411.196	0.214528	0.143628	1.49357	0.135288	0.48849	0.135288	0.48849	406.493	494.312	345.961	398.017
ENSCSAG00000004822	ZNF507	zinc finger protein 507	157.397	0.214468	0.165338	1.29651	0.194801	0.567852	0.194801	0.567852	136.455	214.358	130.375	148.402
ENSCSAG00000007811	SUPV3L1	Suv3 like RNA helicase	184.358	0.214402	0.158113	1.35675	0.174861	0.545536	0.174861	0.545536	195.347	212.015	182.354	147.718
ENSCSAG00000001318			67.4951	0.214379	0.171574	1.25012	0.211254	NA	0.211254	1	80.4368	73.7953	52.8315	62.9168
ENSCSAG00000014787	SNAI2	snail family transcriptional repressor 2	31.9882	0.214327	0.165149	1.29762	0.194419	NA	0.194419	1	35.9093	40.9974	23.0073	28.039
ENSCSAG00000012026	SVEP1		47.0341	0.214245	0.170714	1.2572	0.208681	NA	0.208681	1	61.764	48.0255	40.0497	38.2972
ENSCSAG00000004401	PPP2R2D		150.949	0.214187	0.160302	1.33655	0.18137	0.551751	0.18137	0.551751	163.746	171.018	129.522	139.511
ENSCSAG00000002291	PATE3		56.9107	0.213891	0.171544	1.24591	0.212797	NA	0.212797	1	58.8912	72.624	40.0497	56.0781
ENSCSAG00000017444	PHIP	pleckstrin homology domain interacting protein	352.983	0.21383	0.145397	1.47088	0.141324	0.499809	0.141324	0.499809	349.038	424.03	336.588	302.274
ENSCSAG00000013372	UPF2	UPF2 regulator of nonsense mediated mRNA decay	193.84	0.213791	0.155677	1.37348	0.169602	0.540726	0.169602	0.540726	205.401	222.557	162.755	184.647
ENSCSAG00000017260	RETREG1	reticulophagy regulator 1	67.532	0.213608	0.171747	1.24348	0.213691	NA	0.213691	1	77.5641	77.3094	46.8667	68.3879
ENSCSAG00000007597	DNA2	DNA replication helicase/nuclease 2	73.3012	0.213445	0.171014	1.24898	0.211674	NA	0.211674	1	81.8732	84.3375	64.7612	62.233
ENSCSAG00000008752	CREB3L2	cAMP responsive element binding protein 3 like 2	59.3288	0.213355	0.171553	1.24503	0.213121	NA	0.213121	1	60.3276	76.138	60.5006	40.3488
ENSCSAG00000000867	ARHGEF10L	Rho guanine nucleotide exchange factor 10 like	86.046	0.213267	0.170984	1.24975	0.21139	0.583679	0.21139	0.583679	112.037	83.1662	86.0642	62.9168
ENSCSAG00000013988	MAP3K13	mitogen-activated protein kinase kinase kinase 13	96.5817	0.213263	0.169368	1.25898	0.208036	0.580192	0.208036	0.580192	90.4914	126.506	85.2121	84.1171
ENSCSAG00000008218	BRAF		54.582	0.213188	0.17126	1.24381	0.213568	NA	0.213568	1	48.8366	77.3094	44.3103	47.8715
ENSCSAG00000001430	ZNHIT6	zinc finger HIT-type containing 6	70.9234	0.212921	0.17167	1.24138	0.214466	NA	0.214466	1	93.3642	69.1099	52.8315	68.3879
ENSCSAG00000016999	NUP155		233.378	0.212816	0.155523	1.36816	0.171262	0.541022	0.171262	0.541022	224.074	290.496	192.579	226.364
ENSCSAG00000011703	EIF3E		2202.66	0.212806	0.120863	1.76076	0.0782794	0.386028	0.0782794	0.386028	2367.14	2417.68	1866.15	2159.69
ENSCSAG00000009470	SF3A1	splicing factor 3a subunit 1	207.133	0.212762	0.154556	1.37719	0.168454	0.538559	0.168454	0.538559	218.328	237.785	199.396	173.021
ENSCSAG00000014417			197.915	0.212755	0.154898	1.3738	0.169504	0.540726	0.169504	0.540726	214.019	222.557	167.016	188.067
ENSCSAG00000012694	SKIL	SKI like proto-oncogene	712.131	0.212554	0.148518	1.43095	0.152444	0.514561	0.152444	0.514561	670.786	892.572	537.688	747.479
ENSCSAG00000012484	CFAP69		11.7529	0.212188	0.131093	1.62755	0.103621	NA	0.103621	1	12.9273	19.913	5.96485	8.20654
ENSCSAG00000011518	RYBP	RING1 and YY1 binding protein	62.7534	0.212128	0.171767	1.2354	0.216682	NA	0.216682	1	60.3276	83.1662	59.6485	47.8715
ENSCSAG00000011728	MPP7	membrane palmitoylated protein 7	63.2959	0.211925	0.17176	1.23539	0.216686	NA	0.216686	1	81.8732	63.2531	51.9794	56.0781
ENSCSAG00000016997	ARFGEF3		146.853	0.211729	0.161019	1.31555	0.188324	0.562177	0.188324	0.562177	156.564	168.675	136.339	125.834
ENSCSAG00000003911	CTCF	CCCTC-binding factor	250.956	0.211492	0.152437	1.38788	0.165175	0.533649	0.165175	0.533649	298.765	254.184	205.361	245.512
ENSCSAG00000017320	LMAN2L		48.2589	0.211416	0.170953	1.23886	0.215399	NA	0.215399	1	61.764	50.3682	42.6061	38.2972
ENSCSAG00000014645		RP1 axonemal microtubule associated	11.8255	0.211307	0.128653	1.65389	0.0981499	NA	0.0981499	1	17.2365	16.399	3.40848	10.2582
ENSCSAG00000018603			44.0724	0.211142	0.170348	1.24003	0.214966	NA	0.214966	1	48.8366	53.8823	36.6412	36.9294
ENSCSAG00000001797	ZNF687		62.6073	0.211098	0.171775	1.23131	0.218205	NA	0.218205	1	79.0004	64.4245	60.5006	46.5037
ENSCSAG00000006092	ACACA	acetyl-CoA carboxylase alpha	431.305	0.211078	0.137876	1.53122	0.125714	0.471205	0.125714	0.471205	452.457	488.455	404.757	379.553
ENSCSAG00000017500	CEP76	centrosomal protein 76	119.284	0.210989	0.165556	1.27454	0.202472	0.574885	0.202472	0.574885	119.219	146.419	104.811	106.685
ENSCSAG00000003346	TAF1C		34.4807	0.210976	0.165923	1.27399	0.202666	NA	0.202666	1	38.782	43.3401	33.2327	22.568
ENSCSAG00000016871	ANAPC1	anaphase promoting complex subunit 1	510.453	0.210933	0.134237	1.57173	0.116013	0.458014	0.116013	0.458014	563.058	549.365	481.448	447.941
ENSCSAG00000014729	CDKL5		54.2292	0.210919	0.171281	1.23028	0.218591	NA	0.218591	1	50.273	74.9667	41.7539	49.9231
ENSCSAG00000009438	SCAF4	SR-related CTD associated factor 4	114.849	0.210901	0.169533	1.24414	0.21345	0.58484	0.21345	0.58484	100.546	156.961	115.036	86.8526
ENSCSAG00000011611	RELN	reelin	36.8703	0.210509	0.166591	1.26791	0.20483	NA	0.20483	1	50.273	37.4833	35.7891	23.9358
ENSCSAG00000012620	NUP35	nucleoporin 35	101.367	0.210498	0.167742	1.25577	0.2092	0.580577	0.2092	0.580577	120.655	106.593	85.2121	93.0075
ENSCSAG00000009437	EXOC4		102.698	0.210441	0.169408	1.24146	0.214437	0.58484	0.214437	0.58484	94.8005	135.877	80.9515	99.1624
ENSCSAG00000014315	HOXA13		68.5822	0.210319	0.171712	1.22433	0.220827	NA	0.220827	1	74.6913	81.9948	48.5709	69.0717
ENSCSAG00000007611	VPS18	VPS18 core subunit of CORVET and HOPS complexes	68.136	0.21018	0.171636	1.22667	0.219947	NA	0.219947	1	86.1823	69.1099	63.9091	53.3425
ENSCSAG00000011152	DOCK4	dedicator of cytokinesis 4	37.1892	0.209936	0.167688	1.25119	0.210864	NA	0.210864	1	38.782	49.1969	27.2679	33.5101
ENSCSAG00000000019	COX2	cytochrome c oxidase subunit II	403.078	0.209838	0.131789	1.6421	0.100568	0.432855	0.100568	0.432855	333.238	791.836	167.868	319.371
ENSCSAG00000013962	VPS8	VPS8 subunit of CORVET complex	152.882	0.20976	0.160753	1.30498	0.191899	0.564718	0.191899	0.564718	158.001	180.389	129.522	143.615
ENSCSAG00000011794	OXR1		572.454	0.209631	0.137696	1.52239	0.127911	0.473271	0.127911	0.473271	577.421	671.186	479.744	561.464
ENSCSAG00000011653	ERC1	ELKS/RAB6-interacting/CAST family member 1	359.012	0.209587	0.142787	1.46823	0.142042	0.500574	0.142042	0.500574	377.766	406.46	346.813	305.01
ENSCSAG00000016412	FBXL5	F-box and leucine rich repeat protein 5	290.482	0.209492	0.147599	1.41946	0.155765	0.519653	0.155765	0.519653	308.82	327.979	242.002	283.126
ENSCSAG00000014330	FBN2	fibrillin 2	91.7345	0.209462	0.169911	1.23226	0.217853	0.589907	0.217853	0.589907	90.4914	115.964	71.5782	88.9042
ENSCSAG00000003427	PLCG2	phospholipase C gamma 2	23.9965	0.20934	0.157634	1.32862	0.183974	NA	0.183974	1	30.1638	29.2839	15.3382	21.2002
ENSCSAG00000011043	TSC2	TSC complex subunit 2	260.213	0.209274	0.154728	1.35361	0.17586	0.545631	0.17586	0.545631	326.056	247.156	255.636	212.002
ENSCSAG00000004452	SCD5	stearoyl-CoA desaturase 5	171.266	0.209175	0.160015	1.30709	0.191182	0.564218	0.191182	0.564218	173.801	204.987	138.044	168.234
ENSCSAG00000004431	HAUS5	HAUS augmin like complex subunit 5	67.2507	0.209099	0.171673	1.21874	0.222943	NA	0.222943	1	83.3095	70.2813	51.1273	64.2846
ENSCSAG00000010024	KIF24		31.1027	0.20909	0.164831	1.26906	0.20442	NA	0.20442	1	35.9093	38.6547	23.8594	25.9874
ENSCSAG00000013821	ARIH1		182.714	0.209088	0.15792	1.32435	0.185385	0.556684	0.185385	0.556684	182.419	220.215	172.981	155.24
ENSCSAG00000003863	METTL25		19.912	0.209015	0.152044	1.37658	0.168643	NA	0.168643	1	25.8547	24.5984	12.7818	16.4131
ENSCSAG00000011146	AP4E1	adaptor related protein complex 4 subunit epsilon 1	141.949	0.209	0.164211	1.27243	0.20322	0.574885	0.20322	0.574885	133.583	181.56	119.297	133.356
ENSCSAG00000001762	POLR3C	RNA polymerase III subunit C	93.9456	0.208888	0.168712	1.23875	0.215439	0.587029	0.215439	0.587029	99.1096	111.279	86.0642	79.3299
ENSCSAG00000016089	RIF1	replication timing regulatory factor 1	601.229	0.208772	0.132996	1.56986	0.116448	0.458014	0.116448	0.458014	630.567	678.214	518.942	577.194
ENSCSAG00000001482	ABCA4		236.353	0.208706	0.151067	1.38173	0.167054	0.536397	0.167054	0.536397	247.056	271.754	203.657	222.944
ENSCSAG00000011919	DVL2	dishevelled segment polarity protein 2	169.627	0.208665	0.16101	1.29711	0.194595	0.567852	0.194595	0.567852	216.892	159.304	149.121	153.189
ENSCSAG00000005038	EXOC1	exocyst complex component 1	302.386	0.208662	0.148481	1.40529	0.159936	0.526489	0.159936	0.526489	294.456	367.805	264.158	283.126
ENSCSAG00000014974	FERMT2		202.977	0.208553	0.15459	1.34924	0.177261	0.547055	0.177261	0.547055	211.147	235.442	173.833	191.486
ENSCSAG00000008891	ATP13A4		40.0006	0.208548	0.168541	1.23627	0.216356	NA	0.216356	1	40.2184	53.8823	28.9721	36.9294
ENSCSAG00000014909	TMEM167A		711.701	0.208512	0.135645	1.53719	0.124246	0.468199	0.124246	0.468199	749.786	801.206	577.738	718.073
ENSCSAG00000009575	DYNC1LI1		185.331	0.208422	0.15715	1.32716	0.184454	0.554678	0.184454	0.554678	224.074	185.074	165.311	166.866
ENSCSAG00000006004		ubiquitin specific peptidase 32	496.517	0.2084	0.136389	1.52812	0.126483	0.472408	0.126483	0.472408	502.73	578.649	453.328	451.36
ENSCSAG00000011325	TRIP11		190.471	0.208308	0.158637	1.31309	0.189153	0.562914	0.189153	0.562914	205.401	215.529	147.417	193.538
ENSCSAG00000010668	CYFIP2	cytoplasmic FMR1 interacting protein 2	543.694	0.208253	0.133843	1.5561	0.119685	0.460424	0.119685	0.460424	581.73	602.076	471.223	519.748
ENSCSAG00000017522	PIEZO2		831.821	0.208252	0.125791	1.6557	0.0977832	0.428128	0.0977832	0.428128	880.496	925.37	760.944	760.473
ENSCSAG00000005656	CWF19L1		129.774	0.208216	0.164219	1.26809	0.204765	0.576773	0.204765	0.576773	142.201	146.419	103.959	126.518
ENSCSAG00000010655	TRMT61B		83.5971	0.208166	0.17173	1.21091	0.225928	NA	0.225928	1	64.6367	125.335	69.8739	74.5428
ENSCSAG00000010731	TOGARAM2		68.8799	0.207953	0.171671	1.21326	0.225029	NA	0.225029	1	80.4368	76.138	69.0218	49.9231
ENSCSAG00000000689	ANKRD65	ankyrin repeat domain 65	23.9974	0.207882	0.152959	1.36862	0.171118	NA	0.171118	1	43.0911	17.5703	19.5988	15.7292
ENSCSAG00000004404	CYB5R2	cytochrome b5 reductase 2	6.81067	0.207875	0.104827	2.08939	0.0366725	NA	0.0366725	1	12.9273	9.37083	4.26061	0.683879
ENSCSAG00000014055	IFT52		152.997	0.207834	0.160643	1.29444	0.195513	0.568228	0.195513	0.568228	179.546	159.304	129.522	143.615
ENSCSAG00000006335	DGKD		214.927	0.207655	0.152293	1.36417	0.172513	0.541897	0.172513	0.541897	241.31	230.757	196.84	190.802
ENSCSAG00000017752	LRCH1		31.3078	0.207553	0.164124	1.26352	0.206401	NA	0.206401	1	33.0365	42.1688	21.303	28.7229
ENSCSAG00000017767	TRRAP	transformation/transcription domain associated protein	1206.51	0.207537	0.123847	1.6758	0.0937773	0.422396	0.0937773	0.422396	1261.13	1356.43	1050.67	1157.81
ENSCSAG00000004440	LIN54	lin-54 DREAM MuvB core complex component	76.8547	0.207518	0.17127	1.2132	0.225053	NA	0.225053	1	101.982	72.624	63.057	69.7556
ENSCSAG00000009626	KHSRP	KH-type splicing regulatory protein	769.235	0.207366	0.12687	1.63469	0.102113	0.434091	0.102113	0.434091	851.768	818.777	694.479	711.918
ENSCSAG00000000852	FBXO42	F-box protein 42	134.074	0.207343	0.16304	1.27266	0.20314	0.574885	0.20314	0.574885	159.437	138.22	117.593	121.047
ENSCSAG00000001881	GATAD2B	GATA zinc finger domain containing 2B	100.614	0.207308	0.168073	1.23455	0.216996	0.589399	0.216996	0.589399	123.528	101.908	86.0642	90.9559
ENSCSAG00000014751	ATG5	autophagy related 5	259.047	0.207197	0.152518	1.3592	0.174083	0.544141	0.174083	0.544141	320.311	249.498	221.551	244.829
ENSCSAG00000012194	TRO	trophinin	38.3147	0.207078	0.16683	1.24135	0.214475	NA	0.214475	1	50.273	40.9974	23.0073	38.9811
ENSCSAG00000011400	DGLUCY		29.2332	0.206961	0.163006	1.27241	0.203229	NA	0.203229	1	40.2184	30.4552	23.0073	23.2519
ENSCSAG00000015174	FOXO3	forkhead box O3	52.927	0.206888	0.171456	1.20861	0.226812	NA	0.226812	1	63.2003	58.5677	50.2751	39.665
ENSCSAG00000011441	MED12	mediator complex subunit 12	274.056	0.20688	0.146902	1.40858	0.158959	0.525186	0.158959	0.525186	291.583	308.066	242.854	253.719
ENSCSAG00000007026	PDIA4	protein disulfide isomerase family A member 4	689.653	0.206861	0.134463	1.53883	0.123845	0.467522	0.123845	0.467522	788.568	712.183	683.401	574.458
ENSCSAG00000013175	SPNS2	sphingolipid transporter 2	4734.46	0.206805	0.119427	1.73172	0.0833239	0.398481	0.0833239	0.398481	5463.96	4793.18	4576.74	4103.96
ENSCSAG00000010795	DSCC1		60.7612	0.206411	0.171765	1.20307	0.228948	NA	0.228948	1	71.8186	66.7672	54.5357	49.9231
ENSCSAG00000007379	ANK3		121.332	0.206285	0.166054	1.24208	0.214208	0.58484	0.214208	0.58484	124.964	145.248	95.4376	119.679
ENSCSAG00000002693	GAS8	growth arrest specific 8	47.1164	0.206215	0.169771	1.21744	0.223438	NA	0.223438	1	54.5821	55.0537	49.423	29.4068
ENSCSAG00000011833	LRP12		533.832	0.206179	0.144612	1.42557	0.153993	0.516878	0.153993	0.516878	496.985	668.843	449.068	520.432
ENSCSAG00000017433	DCUN1D2		25.4137	0.206052	0.159894	1.29086	0.196753	NA	0.196753	1	31.6002	30.4552	20.4509	19.1486
ENSCSAG00000007898	EIF3D	eukaryotic translation initiation factor 3 subunit D	661.944	0.206049	0.13601	1.51538	0.129675	0.476988	0.129675	0.476988	798.623	643.074	622.048	584.032
ENSCSAG00000009102	AHCTF1		432.413	0.205986	0.142092	1.44971	0.147139	0.506521	0.147139	0.506521	417.984	524.767	397.088	389.811
ENSCSAG00000013574	ITGB8	integrin subunit beta 8	54.3902	0.205894	0.171551	1.19973	0.230245	NA	0.230245	1	54.5821	70.2813	43.4582	49.2393
ENSCSAG00000009584	URB1		137.436	0.205739	0.167485	1.22966	0.218826	0.590581	0.218826	0.590581	147.946	158.133	149.973	93.6914
ENSCSAG00000006675			10.4377	0.205691	0.124535	1.66444	0.0960237	NA	0.0960237	1	10.0546	19.913	4.26061	7.52267
ENSCSAG00000016746	NNT	nicotinamide nucleotide transhydrogenase	351.581	0.205681	0.143298	1.43542	0.151166	0.512396	0.151166	0.512396	363.402	404.117	301.651	337.152
ENSCSAG00000005229		extended synaptotagmin 1	719.114	0.205675	0.135123	1.52253	0.127876	0.473271	0.127876	0.473271	815.859	748.495	722.599	589.503
ENSCSAG00000004263	ZNF821	zinc finger protein 821	44.4028	0.205567	0.170158	1.20835	0.226913	NA	0.226913	1	53.1457	50.3682	32.3806	41.7166
ENSCSAG00000015280	REXO4	REX4 homolog, 3'-5' exonuclease	70.308	0.205412	0.171546	1.19916	0.230464	NA	0.230464	1	91.9278	67.9385	60.5006	60.8652
ENSCSAG00000010723	SLCO2A1	solute carrier organic anion transporter family member 2A1	94.7988	0.205334	0.168477	1.21947	0.222668	0.594641	0.222668	0.594641	109.164	103.079	80.0994	86.8526
ENSCSAG00000004214	FRS2	fibroblast growth factor receptor substrate 2	316.651	0.205312	0.15034	1.3655	0.172095	0.541715	0.172095	0.541715	320.311	373.662	250.524	322.107
ENSCSAG00000010725	ABCA3		321.256	0.205286	0.144186	1.42425	0.154374	0.517332	0.154374	0.517332	370.584	331.493	285.461	297.487
ENSCSAG00000013863			53.5494	0.205235	0.171565	1.19695	0.231325	NA	0.231325	1	64.6367	58.5677	41.7539	49.2393
ENSCSAG00000007991	KAT5		155.658	0.205098	0.15948	1.28675	0.198181	0.571769	0.198181	0.571769	172.365	171.018	143.156	136.092
ENSCSAG00000017750	ESD	esterase D	170.46	0.205045	0.157728	1.30032	0.193492	0.566507	0.193492	0.566507	180.983	194.445	149.121	157.292
ENSCSAG00000016351	LIN9	lin-9 DREAM MuvB core complex component	58.0683	0.204975	0.171499	1.19444	0.232304	NA	0.232304	1	64.6367	69.1099	38.3454	60.1813
ENSCSAG00000010695	SNTB1	syntrophin beta 1	84.8393	0.204919	0.170047	1.20587	0.227868	NA	0.227868	1	101.982	89.0229	69.0218	79.3299
ENSCSAG00000004149	NFAT5	nuclear factor of activated T cells 5	220.918	0.204888	0.163144	1.25517	0.209417	0.580577	0.209417	0.580577	193.91	295.181	166.164	228.415
ENSCSAG00000004321	TRIM3	tripartite motif containing 3	23.4344	0.204822	0.154956	1.31995	0.186853	NA	0.186853	1	24.4183	33.9693	12.7818	22.568
ENSCSAG00000006903	EIF3L		880.515	0.204811	0.128291	1.5965	0.110377	0.449104	0.110377	0.449104	894.859	1015.56	777.987	833.648
ENSCSAG00000002683	CEP164		96.7675	0.204746	0.170483	1.20284	0.229039	0.602548	0.229039	0.602548	112.037	105.422	103.959	65.6524
ENSCSAG00000016932			1397.18	0.204739	0.119614	1.71176	0.0869418	0.408745	0.0869418	0.408745	1479.46	1545.02	1273.07	1291.16
ENSCSAG00000016927	MYRIP	myosin VIIA and Rab interacting protein	14.0485	0.204685	0.139387	1.47389	0.14051	NA	0.14051	1	18.6728	18.7417	8.52121	10.2582
ENSCSAG00000005698	ABCC2		26.7174	0.204665	0.160405	1.27504	0.202294	NA	0.202294	1	28.7274	36.312	17.8945	23.9358
ENSCSAG00000014351	PKN3	protein kinase N3	50.1819	0.204631	0.170985	1.19935	0.230391	NA	0.230391	1	63.2003	52.7109	48.5709	36.2456
ENSCSAG00000001590	TRIM28	tripartite motif containing 28	1910.58	0.204466	0.125578	1.62838	0.103445	0.436971	0.103445	0.436971	2178.98	1963.19	1901.93	1598.22
ENSCSAG00000012270		RNA binding motif protein 27	222.147	0.204442	0.153312	1.3336	0.182336	0.553039	0.182336	0.553039	221.201	265.897	197.692	203.796
ENSCSAG00000011135	KIZ		34.0671	0.204293	0.166221	1.22867	0.219195	NA	0.219195	1	38.782	42.1688	23.8594	31.4584
ENSCSAG00000017154	CORIN	corin, serine peptidase	5.72907	0.204191	0.101539	2.09005	0.0366135	NA	0.0366135	1	8.61823	10.5422	1.70424	2.05164
ENSCSAG00000011757	PDE6A	phosphodiesterase 6A	24.7853	0.204038	0.158178	1.28915	0.197344	NA	0.197344	1	24.4183	36.312	17.8945	20.5164
ENSCSAG00000011707	CEP128		68.6679	0.204001	0.171448	1.19009	0.234011	NA	0.234011	1	74.6913	80.8234	56.24	62.9168
ENSCSAG00000012425	PRPF4		136.56	0.20385	0.163043	1.25142	0.210783	0.583191	0.210783	0.583191	159.437	142.905	130.375	113.524
ENSCSAG00000013744	RBM10	RNA binding motif protein 10	206.703	0.203366	0.156215	1.30274	0.192663	0.565392	0.192663	0.565392	232.692	221.386	207.918	164.815
ENSCSAG00000001455	LRRC8C	leucine rich repeat containing 8 VRAC subunit C	153.863	0.203264	0.163248	1.24475	0.213223	0.584603	0.213223	0.584603	150.819	189.759	121.001	153.873
ENSCSAG00000016316	ABCA2	ATP binding cassette subfamily A member 2	252.54	0.203126	0.148939	1.36445	0.172427	0.541897	0.172427	0.541897	282.965	269.411	236.89	220.893
ENSCSAG00000012151	MLF1		216.921	0.203102	0.152082	1.33596	0.181562	0.551751	0.181562	0.551751	241.31	234.271	191.727	200.376
ENSCSAG00000006559	CYFIP1	cytoplasmic FMR1 interacting protein 1	409.715	0.203063	0.13979	1.45316	0.14618	0.506121	0.14618	0.506121	468.257	424.03	390.271	356.301
ENSCSAG00000006691	ANKRD1	ankyrin repeat domain 1	654.922	0.202726	0.129579	1.56477	0.117638	0.458271	0.117638	0.458271	731.113	689.928	594.78	603.865
ENSCSAG00000006106	KIF22	kinesin family member 22	157.932	0.202712	0.164941	1.23066	0.218451	0.590154	0.218451	0.590154	205.401	145.248	159.347	121.73
ENSCSAG00000016550			103.283	0.202669	0.167691	1.2097	0.226396	0.598831	0.226396	0.598831	126.401	104.251	89.4727	93.0075
ENSCSAG00000014539	CHN1	chimerin 1	202.511	0.202617	0.160318	1.2634	0.206445	0.578724	0.206445	0.578724	183.856	262.383	166.164	197.641
ENSCSAG00000007395	DAPK1	death associated protein kinase 1	651.219	0.202219	0.130754	1.54678	0.121916	0.464926	0.121916	0.464926	683.713	728.582	619.492	573.09
ENSCSAG00000011538	RNF13	ring finger protein 13	128.259	0.202082	0.166916	1.21008	0.226249	0.598831	0.226249	0.598831	124.964	160.476	96.2897	131.305
ENSCSAG00000013400	PCNA	proliferating cell nuclear antigen	1308.92	0.20207	0.121684	1.66068	0.0967781	0.426975	0.0967781	0.426975	1377.48	1454.82	1158.03	1245.34
ENSCSAG00000011656	GTF2A1	general transcription factor IIA subunit 1	548.003	0.202064	0.147847	1.36656	0.171764	0.541715	0.171764	0.541715	563.058	634.874	407.314	586.768
ENSCSAG00000015411	CSTF1	cleavage stimulation factor subunit 1	370.6	0.201975	0.143365	1.40889	0.158868	0.525161	0.158868	0.525161	393.566	414.659	307.616	366.559
ENSCSAG00000000016	COX1	cytochrome c oxidase subunit I	7733.51	0.201768	0.138872	1.48217	0.138296	0.49547	0.138296	0.49547	6870.17	13755.2	3463.02	6845.63
ENSCSAG00000011186	SLC2A11	solute carrier family 2 member 11	58.5873	0.201641	0.171774	1.17495	0.240013	NA	0.240013	1	70.3822	63.2531	49.423	51.2909
ENSCSAG00000009241	TRIP10	thyroid hormone receptor interactor 10	121.116	0.201594	0.165867	1.21671	0.223715	0.596315	0.223715	0.596315	152.255	117.135	109.071	106.001
ENSCSAG00000004163	WWP2	WW domain containing E3 ubiquitin protein ligase 2	190.684	0.201593	0.156577	1.28844	0.197591	0.57085	0.197591	0.57085	228.383	190.931	177.241	166.183
ENSCSAG00000004875	PPP6R2		124.655	0.201514	0.164385	1.22662	0.219964	0.590709	0.219964	0.590709	146.51	130.02	106.515	115.575
ENSCSAG00000012660	VIRMA	vir like m6A methyltransferase associated	279.639	0.201425	0.150086	1.34228	0.179506	0.549455	0.179506	0.549455	316.002	296.353	225.812	280.39
ENSCSAG00000009526	BRF1	BRF1 RNA polymerase III transcription initiation factor subunit	158.588	0.20129	0.161438	1.24804	0.212018	0.584149	0.212018	0.584149	198.219	152.276	145.713	138.143
ENSCSAG00000017732			22.9972	0.201285	0.155193	1.30222	0.19284	NA	0.19284	1	28.7274	28.1125	22.1551	12.9937
ENSCSAG00000013503	ABCC5	ATP binding cassette subfamily C member 5	146.429	0.201261	0.16113	1.24936	0.211534	0.583679	0.211534	0.583679	158.001	165.161	124.41	138.143
ENSCSAG00000008501	ANKRD13D		48.0108	0.201237	0.170925	1.17901	0.238396	NA	0.238396	1	61.764	49.1969	40.0497	41.0327
ENSCSAG00000005134	TBC1D22A	TBC1 domain family member 22A	170.064	0.201195	0.157611	1.27725	0.201515	0.574699	0.201515	0.574699	192.474	181.56	155.086	151.137
ENSCSAG00000006117	SPATS2	spermatogenesis associated serine rich 2	322.013	0.201192	0.14601	1.37809	0.168174	0.537936	0.168174	0.537936	318.874	383.033	301.651	284.494
ENSCSAG00000001795	PIP5K1A		123.488	0.201164	0.165663	1.21458	0.224525	0.596927	0.224525	0.596927	142.201	132.363	96.2897	123.098
ENSCSAG00000018146	WDR7	WD repeat domain 7	81.7934	0.201092	0.170493	1.17946	0.238214	NA	0.238214	1	89.055	94.8797	63.9091	79.3299
ENSCSAG00000001355	PDE4B		8.23332	0.201067	0.115545	1.77001	0.0767247	NA	0.0767247	1	14.3637	10.5422	2.55636	5.47103
ENSCSAG00000018014	NAT16		39.6923	0.200961	0.168058	1.19936	0.230389	NA	0.230389	1	54.5821	38.6547	37.4933	28.039
ENSCSAG00000007723	CAPN1		576.246	0.200912	0.136901	1.46804	0.142094	0.500574	0.142094	0.500574	682.276	570.45	553.027	499.231
ENSCSAG00000002241	HGS	hepatocyte growth factor-regulated tyrosine kinase substrate	131.115	0.200756	0.16345	1.22924	0.218982	0.590581	0.218982	0.590581	149.383	140.563	124.41	110.104
ENSCSAG00000016433	MGAT5	alpha-1,6-mannosylglycoprotein 6-beta-N-acetylglucosaminyltransferase	135.506	0.20072	0.163617	1.22794	0.219468	0.590602	0.219468	0.590602	166.619	133.534	123.558	118.311
ENSCSAG00000002987	KRT15	keratin 15	17.8204	0.200706	0.144777	1.39824	0.162042	NA	0.162042	1	27.2911	18.7417	17.0424	8.20654
ENSCSAG00000018353	NKRF	NFKB repressing factor	46.7171	0.200691	0.170822	1.17544	0.23982	NA	0.23982	1	50.273	57.3964	40.9018	38.2972
ENSCSAG00000017641	AP5Z1	adaptor related protein complex 5 subunit zeta 1	106.096	0.200623	0.170727	1.17746	0.239011	0.6102	0.239011	0.6102	153.692	85.5089	99.6982	85.4848
ENSCSAG00000000670	AGRN	agrin	2731.05	0.200469	0.134334	1.49246	0.135578	0.488775	0.135578	0.488775	3213.16	2715.2	2847.79	2148.06
ENSCSAG00000017414	TTK	TTK protein kinase	105.036	0.200432	0.169619	1.18123	0.237513	0.609631	0.237513	0.609631	114.91	120.649	72.4303	112.156
ENSCSAG00000002928	NOP53	NOP53 ribosome biogenesis factor	585.126	0.200408	0.139658	1.43549	0.151147	0.512396	0.151147	0.512396	689.458	583.334	586.259	481.451
ENSCSAG00000008453	ITSN2	intersectin 2	120.472	0.200246	0.166146	1.20672	0.227541	0.60067	0.227541	0.60067	149.383	118.307	115.036	99.1624
ENSCSAG00000012860	PLEKHH2	pleckstrin homology, MyTH4 and FERM domain containing H2	308.876	0.200197	0.146089	1.37046	0.170543	0.540791	0.170543	0.540791	310.256	363.12	273.531	288.597
ENSCSAG00000013375	DST	dystonin	1687.7	0.200147	0.122041	1.64004	0.100997	0.433538	0.100997	0.433538	1694.92	1953.82	1555.12	1546.93
ENSCSAG00000003690	BCAR1		600.049	0.200057	0.141439	1.41493	0.157088	0.522827	0.157088	0.522827	696.64	609.104	617.788	476.663
ENSCSAG00000009061	SMARCAL1	SWI/SNF related, matrix associated, actin dependent regulator of chromatin, subfamily a like 1	76.6451	0.199954	0.171315	1.16802	0.242799	NA	0.242799	1	77.5641	94.8797	76.6909	57.4458
ENSCSAG00000016150	CAPN2	calpain 2	772.363	0.199924	0.127975	1.56242	0.118188	0.458477	0.118188	0.458477	867.568	805.892	687.662	728.331
ENSCSAG00000011455	PDZRN3	PDZ domain containing ring finger 3	45.5612	0.199878	0.167899	1.19362	0.232628	NA	0.232628	1	50.273	56.225	51.1273	24.6196
ENSCSAG00000008734		discs large MAGUK scaffold protein 1	303.311	0.199822	0.153475	1.30169	0.193021	0.565392	0.193021	0.565392	293.02	371.319	237.742	311.165
ENSCSAG00000013991	PFKP	phosphofructokinase, platelet	678.6	0.199787	0.132147	1.51221	0.130481	0.477355	0.130481	0.477355	792.877	679.385	628.013	614.123
ENSCSAG00000016585	HNRNPC	heterogeneous nuclear ribonucleoprotein C	800.143	0.199757	0.128133	1.5592	0.11895	0.460021	0.11895	0.460021	850.332	882.03	772.022	696.188
ENSCSAG00000015453	MIPOL1	mirror-image polydactyly 1	115.943	0.199721	0.166658	1.19822	0.230831	0.604247	0.230831	0.604247	120.655	137.048	91.177	114.892
ENSCSAG00000010865	EEF2	eukaryotic translation elongation factor 2	6307.3	0.199655	0.116787	1.70962	0.0873355	0.409312	0.0873355	0.409312	7268.04	6352.25	5961.44	5647.47
ENSCSAG00000015427	NSD3	nuclear receptor binding SET domain protein 3	189.835	0.199477	0.158525	1.25813	0.208345	0.580192	0.208345	0.580192	185.292	231.928	156.79	185.331
ENSCSAG00000004268	AP1G1	adaptor related protein complex 1 subunit gamma 1	523.745	0.199462	0.138076	1.4446	0.148571	0.508394	0.148571	0.508394	544.385	593.877	436.286	520.432
ENSCSAG00000017046	FURIN	furin, paired basic amino acid cleaving enzyme	600.114	0.19934	0.130744	1.52492	0.127279	0.472592	0.127279	0.472592	663.604	637.217	547.062	552.574
ENSCSAG00000008307	TBC1D9B	TBC1 domain family member 9B	504.976	0.199304	0.139501	1.42922	0.152941	0.51513	0.152941	0.51513	600.403	497.826	487.413	434.263
ENSCSAG00000000427	RPS27AP5		223.749	0.199219	0.152433	1.30762	0.191002	0.564218	0.191002	0.564218	262.856	227.243	201.101	203.796
ENSCSAG00000001461	TGFBR3	transforming growth factor beta receptor 3	45.3534	0.199103	0.169661	1.17677	0.239286	NA	0.239286	1	64.6367	40.9974	40.9018	34.8778
ENSCSAG00000012834	MINDY3	MINDY lysine 48 deubiquitinase 3	89.9704	0.198805	0.169378	1.17401	0.24039	0.6102	0.24039	0.6102	100.546	100.736	72.4303	86.1687
ENSCSAG00000012748	TNIK	TRAF2 and NCK interacting kinase	73.2501	0.198782	0.171533	1.15905	0.246436	NA	0.246436	1	68.9458	96.0511	69.8739	58.1297
ENSCSAG00000017076	APBB2		832.096	0.19866	0.142152	1.39739	0.162298	0.530128	0.162298	0.530128	797.186	1013.22	660.394	857.584
ENSCSAG00000011434	CRNKL1	crooked neck pre-mRNA splicing factor 1	123.767	0.198658	0.165711	1.20011	0.230098	0.604073	0.230098	0.604073	156.564	118.307	110.776	109.421
ENSCSAG00000010492	CADPS2		275.454	0.198599	0.154048	1.28899	0.197403	0.570826	0.197403	0.570826	249.929	352.578	242.854	256.455
ENSCSAG00000006230	AGAP1		116.983	0.198506	0.166261	1.19529	0.231973	0.605356	0.231973	0.605356	145.074	114.793	108.219	99.8463
ENSCSAG00000009685	SLC4A7		225.24	0.198414	0.151913	1.30632	0.191445	0.564218	0.191445	0.564218	238.438	254.184	194.284	214.054
ENSCSAG00000007404	DSP	desmoplakin	541.815	0.19837	0.133697	1.48409	0.137784	0.494849	0.137784	0.494849	603.276	571.621	516.385	475.98
ENSCSAG00000006728	CNN1	calponin 1	61.4764	0.19832	0.171776	1.15644	0.2475	NA	0.2475	1	79.0004	60.9104	55.3879	50.607
ENSCSAG00000016167	EPC2	enhancer of polycomb homolog 2	247.932	0.198271	0.154947	1.27949	0.200725	0.573617	0.200725	0.573617	261.42	282.296	190.875	257.138
ENSCSAG00000001755		G protein-coupled receptor 89A	64.6121	0.198238	0.171772	1.15362	0.248654	NA	0.248654	1	57.4549	89.0229	57.9442	54.0264
ENSCSAG00000006959	KRBA1		25.6482	0.198205	0.159141	1.2495	0.211481	NA	0.211481	1	33.0365	29.2839	23.8594	16.4131
ENSCSAG00000009894	PHF20L1	PHD finger protein 20 like 1	219.583	0.198102	0.153004	1.29517	0.195262	0.568153	0.195262	0.568153	226.947	253.013	209.622	188.751
ENSCSAG00000006469	FADS1		637.673	0.19803	0.133877	1.47945	0.139021	0.496889	0.139021	0.496889	738.295	645.416	552.174	614.807
ENSCSAG00000014640	CCT4	chaperonin containing TCP1 subunit 4	1047.39	0.197966	0.125419	1.5786	0.114428	0.456059	0.114428	0.456059	1190.75	1075.3	927.108	996.411
ENSCSAG00000001686	SLC22A15		38.5723	0.197922	0.168573	1.17534	0.239858	NA	0.239858	1	43.0911	46.8542	34.937	29.4068
ENSCSAG00000013098	DCAF5	DDB1 and CUL4 associated factor 5	228.117	0.197877	0.156748	1.26265	0.206713	0.578824	0.206713	0.578824	218.328	281.125	228.368	184.647
ENSCSAG00000017262	ZNF622	zinc finger protein 622	143.085	0.197843	0.163892	1.2085	0.226857	0.599801	0.226857	0.599801	170.928	145.248	144.008	112.156
ENSCSAG00000006621	MTG1	mitochondrial ribosome associated GTPase 1	127.446	0.197799	0.164243	1.20528	0.228094	0.601482	0.228094	0.601482	142.201	139.391	123.558	104.633
ENSCSAG00000011361	PPP4R3A	protein phosphatase 4 regulatory subunit 3A	417.862	0.19779	0.140266	1.41015	0.158494	0.524474	0.158494	0.524474	426.602	481.427	361.299	402.121
ENSCSAG00000003426	MED17	mediator complex subunit 17	122.202	0.197673	0.164889	1.19907	0.2305	0.604073	0.2305	0.604073	133.583	137.048	100.55	117.627
ENSCSAG00000001130			59.2974	0.19754	0.171707	1.15107	0.249705	NA	0.249705	1	74.6913	60.9104	43.4582	58.1297
ENSCSAG00000004400	MSRB3		91.1691	0.197422	0.169293	1.16648	0.243422	0.613598	0.243422	0.613598	91.9278	111.279	83.5079	77.9622
ENSCSAG00000010485	BMPR2	bone morphogenetic protein receptor type 2	768.787	0.197422	0.134628	1.46639	0.142543	0.500666	0.142543	0.500666	775.641	891.401	640.795	767.312
ENSCSAG00000010873	DAPK3	death associated protein kinase 3	116.216	0.197406	0.167622	1.17933	0.238266	0.609631	0.238266	0.609631	152.255	106.593	108.219	97.7946
ENSCSAG00000009554	NAP1L4	nucleosome assembly protein 1 like 4	1266.85	0.197212	0.120666	1.63448	0.102159	0.434091	0.102159	0.434091	1340.13	1395.08	1181.89	1150.28
ENSCSAG00000004413	COG1	component of oligomeric golgi complex 1	99.7578	0.197191	0.167995	1.17499	0.239997	0.6102	0.239997	0.6102	117.782	104.251	92.8812	84.1171
ENSCSAG00000005127	PRMT3	protein arginine methyltransferase 3	172.631	0.197094	0.158778	1.24142	0.214451	0.58484	0.214451	0.58484	183.856	195.616	141.452	169.602
ENSCSAG00000018614	TRIM13	tripartite motif containing 13	47.019	0.197063	0.170051	1.15738	0.247118	NA	0.247118	1	43.0911	65.5958	34.937	44.4521
ENSCSAG00000003101	GALNT7	polypeptide N-acetylgalactosaminyltransferase 7	168.776	0.197	0.159887	1.23211	0.217908	0.589907	0.217908	0.589907	178.11	193.273	135.487	168.234
ENSCSAG00000011689	TAFA4		70.1638	0.196975	0.171567	1.14934	0.250415	NA	0.250415	1	76.1277	81.9948	69.8739	52.6587
ENSCSAG00000015756	SCFD1		144.625	0.196868	0.161857	1.21662	0.223748	0.596315	0.223748	0.596315	160.874	158.133	119.297	140.195
ENSCSAG00000000976	DHDDS		17.1812	0.196794	0.147226	1.33932	0.180466	NA	0.180466	1	21.5456	22.2557	11.9297	12.9937
ENSCSAG00000002677	RPL19	ribosomal protein L19	2382.34	0.196739	0.115571	1.70242	0.0886772	0.410161	0.0886772	0.410161	2628.56	2509.04	2219.78	2172
ENSCSAG00000015086	FRMD6	FERM domain containing 6	185.608	0.196739	0.158294	1.24274	0.213964	0.58484	0.213964	0.58484	182.419	224.9	155.938	179.176
ENSCSAG00000008897	ERMP1		196.299	0.196692	0.160212	1.22752	0.219629	0.590602	0.219629	0.590602	209.71	222.557	145.713	207.215
ENSCSAG00000008654	TTLL4	tubulin tyrosine ligase like 4	70.1683	0.196621	0.171339	1.14842	0.250796	NA	0.250796	1	83.3095	74.9667	58.7964	63.6007
ENSCSAG00000012763	TMEM67	transmembrane protein 67	98.0634	0.196621	0.169821	1.15714	0.247216	0.618723	0.247216	0.618723	87.6187	131.192	81.8036	91.6397
ENSCSAG00000005387	XYLT2		93.9248	0.196429	0.168496	1.16659	0.243377	0.613598	0.243377	0.613598	104.855	104.251	85.2121	81.3816
ENSCSAG00000005825	ZNF629	zinc finger protein 629	127.141	0.19639	0.163812	1.19953	0.23032	0.604073	0.23032	0.604073	136.455	144.077	119.297	108.737
ENSCSAG00000001643	ZNF304		113.869	0.196362	0.166773	1.17724	0.239098	0.6102	0.239098	0.6102	110.601	141.734	97.1418	106.001
ENSCSAG00000010139	SLIT3		611.838	0.19631	0.13226	1.48443	0.137695	0.494849	0.137695	0.494849	626.258	698.127	575.182	547.787
ENSCSAG00000018037		spermatogenesis associated 13	107.747	0.196253	0.16712	1.17506	0.239972	0.6102	0.239972	0.6102	113.473	125.335	103.959	88.2203
ENSCSAG00000004260	IST1	IST1 factor associated with ESCRT-III	429.184	0.196204	0.14053	1.39672	0.162499	0.53051	0.162499	0.53051	502.73	429.887	410.722	373.398
ENSCSAG00000015355	ARIH2	E3 ubiquitin-protein ligase ARIH2	181.862	0.196192	0.159828	1.22727	0.21972	0.590602	0.21972	0.590602	170.928	228.414	155.086	173.021
ENSCSAG00000012325	ARHGAP21		329.372	0.196023	0.144053	1.36088	0.173552	0.543677	0.173552	0.543677	340.42	376.005	287.165	313.9
ENSCSAG00000005500	SAMM50		172.32	0.195964	0.157191	1.24713	0.212351	0.584149	0.212351	0.584149	188.165	189.759	153.382	157.976
ENSCSAG00000001456	ZNF326	zinc finger protein 326	89.9507	0.195865	0.169945	1.15226	0.249215	0.620036	0.249215	0.620036	84.7459	115.964	78.3951	80.6977
ENSCSAG00000015737	STRN3		194.936	0.195862	0.157731	1.24158	0.214392	0.58484	0.214392	0.58484	189.601	237.785	163.607	188.751
ENSCSAG00000009866	TAMM41	TAM41 mitochondrial translocator assembly and maintenance homolog	39.5332	0.19541	0.167892	1.16228	0.245122	NA	0.245122	1	37.3457	55.0537	28.12	37.6133
ENSCSAG00000005934	KIF1A		219.787	0.195402	0.152549	1.2816	0.199982	0.573549	0.199982	0.573549	255.674	224.9	200.248	198.325
ENSCSAG00000009433	NADSYN1	NAD synthetase 1	184.73	0.195373	0.155674	1.25562	0.209252	0.580577	0.209252	0.580577	205.401	199.13	169.572	164.815
ENSCSAG00000017555	ZFAND2A		19.3308	0.195221	0.149704	1.3086	0.190671	NA	0.190671	1	21.5456	26.9411	17.8945	10.9421
ENSCSAG00000015305	RCOR3	REST corepressor 3	47.9957	0.195195	0.170777	1.14258	0.253211	NA	0.253211	1	53.1457	57.3964	34.937	46.5037
ENSCSAG00000019092	H1-4	H1.4 linker histone, cluster member	1070.13	0.195164	0.135327	1.44248	0.149167	0.508504	0.149167	0.508504	1282.68	1036.65	1072.82	888.358
ENSCSAG00000005326	SH3PXD2A		71.686	0.195033	0.171282	1.1387	0.254826	NA	0.254826	1	73.2549	87.8516	61.3527	64.2846
ENSCSAG00000010490	PARG	poly(ADP-ribose) glycohydrolase	241.31	0.195003	0.15661	1.24482	0.213199	0.584603	0.213199	0.584603	229.819	298.695	192.579	244.145
ENSCSAG00000005576	EFCAB6	EF-hand calcium binding domain 6	27.2082	0.195002	0.158055	1.23172	0.218055	NA	0.218055	1	30.1638	36.312	13.6339	28.7229
ENSCSAG00000000033	ND6	NADH dehydrogenase subunit 6	108.383	0.194991	0.166333	1.17295	0.240817	0.610681	0.240817	0.610681	120.655	119.478	96.2897	97.1108
ENSCSAG00000016930	KLB		4.93397	0.194934	0.0937047	2.21647	0.0266591	NA	0.0266591	1	11.491	5.85677	1.70424	0.683879
ENSCSAG00000010007	UBAP2	ubiquitin associated protein 2	248.649	0.194914	0.150367	1.29638	0.194844	0.567852	0.194844	0.567852	261.42	281.125	211.326	240.725
ENSCSAG00000011667	TMF1	TATA element modulatory factor 1	274.357	0.194907	0.146773	1.32838	0.184052	0.554496	0.184052	0.554496	305.947	291.667	245.411	254.403
ENSCSAG00000008189	LRRC8E	leucine rich repeat containing 8 VRAC subunit E	80.0526	0.194893	0.170619	1.14377	0.252718	NA	0.252718	1	96.2369	83.1662	75.8388	64.9685
ENSCSAG00000017176	NPAS2	neuronal PAS domain protein 2	54.0983	0.194691	0.17119	1.13663	0.255694	NA	0.255694	1	47.4003	76.138	47.7188	45.136
ENSCSAG00000017807	ZSCAN25	zinc finger and SCAN domain containing 25	66.8009	0.194592	0.171713	1.13521	0.256288	NA	0.256288	1	81.8732	69.1099	65.6133	50.607
ENSCSAG00000005167	TNRC6C		87.7169	0.194536	0.170252	1.14214	0.253395	0.623824	0.253395	0.623824	84.7459	111.279	70.726	84.1171
ENSCSAG00000008003	ZSCAN26		84.96	0.194424	0.170346	1.14145	0.253682	NA	0.253682	1	81.8732	107.765	78.3951	71.8073
ENSCSAG00000015536	GRB14	growth factor receptor bound protein 14	111.889	0.194402	0.166033	1.17179	0.241281	0.611122	0.241281	0.611122	130.71	117.135	100.55	99.1624
ENSCSAG00000005638		vascular endothelial zinc finger 1	622.537	0.194298	0.144681	1.34279	0.179339	0.549455	0.179339	0.549455	614.767	739.125	483.153	653.104
ENSCSAG00000012036	MYO1E	myosin IE	212.28	0.19427	0.153668	1.26441	0.206082	0.577962	0.206082	0.577962	214.019	249.498	193.431	192.17
ENSCSAG00000015154	MAP4K5		255.381	0.19421	0.156247	1.24262	0.214007	0.58484	0.214007	0.58484	242.747	316.266	201.953	260.558
ENSCSAG00000009642	ADCY9	adenylate cyclase 9	126.684	0.193901	0.164158	1.18153	0.237393	0.609631	0.237393	0.609631	129.273	149.933	116.741	110.788
ENSCSAG00000009342	PDCD6IP	programmed cell death 6 interacting protein	592.538	0.1939	0.136089	1.4248	0.154214	0.517332	0.154214	0.517332	580.294	702.813	528.315	558.729
ENSCSAG00000002006	ZNF613	zinc finger protein 613	29.6477	0.193826	0.163283	1.18676	0.235322	NA	0.235322	1	34.4729	36.312	20.4509	27.3551
ENSCSAG00000011442	UBR2	ubiquitin protein ligase E3 component n-recognin 2	252.462	0.193805	0.151392	1.28024	0.200459	0.573617	0.200459	0.573617	245.62	304.552	232.629	227.048
ENSCSAG00000015679	ESRRG	estrogen related receptor gamma	174.718	0.193742	0.162137	1.1945	0.232282	0.605356	0.232282	0.605356	158.001	226.071	146.565	168.234
ENSCSAG00000006349	ADGRL1		326.455	0.193543	0.147606	1.31194	0.189541	0.562914	0.189541	0.562914	386.384	324.465	322.102	272.868
ENSCSAG00000012143			15.5105	0.19353	0.143435	1.35348	0.175904	NA	0.175904	1	20.1092	19.913	11.0776	10.9421
ENSCSAG00000004924			697.316	0.193418	0.166532	1.16408	0.244392	0.615308	0.244392	0.615308	810.114	830.49	400.497	748.163
ENSCSAG00000014173	ABR		494.992	0.193372	0.135319	1.42937	0.152897	0.51513	0.152897	0.51513	545.821	525.938	474.631	433.579
ENSCSAG00000016529	CCDC93	coiled-coil domain containing 93	110.99	0.193321	0.168002	1.15222	0.249229	0.620036	0.249229	0.620036	145.074	101.908	100.55	96.4269
ENSCSAG00000007602	PPFIBP1	PPFIA binding protein 1	204.134	0.193283	0.159392	1.21239	0.225364	0.597602	0.225364	0.597602	182.419	264.726	184.058	185.331
ENSCSAG00000009647	SORD		33.1538	0.193205	0.16558	1.16836	0.24266	NA	0.24266	1	44.5275	33.9693	24.7115	29.4068
ENSCSAG00000003868			24.8425	0.193176	0.156444	1.23666	0.216212	NA	0.216212	1	22.9819	37.4833	23.8594	15.0453
ENSCSAG00000012505	PCDHB14		8.81971	0.193026	0.119918	1.62709	0.103717	NA	0.103717	1	11.491	14.0563	4.26061	5.47103
ENSCSAG00000002770	FANCA		247.897	0.193009	0.151801	1.27217	0.203312	0.574885	0.203312	0.574885	275.783	264.726	247.967	203.112
ENSCSAG00000007037	EZH2		124.026	0.192897	0.164263	1.17473	0.240103	0.6102	0.240103	0.6102	129.273	144.077	113.332	109.421
ENSCSAG00000011943	MBNL1	muscleblind like splicing regulator 1	471.023	0.192896	0.14765	1.30627	0.191461	0.564218	0.191461	0.564218	472.566	552.879	362.151	496.496
ENSCSAG00000008180	RIN1	Ras and Rab interactor 1	52.5849	0.192808	0.171409	1.12686	0.259803	NA	0.259803	1	67.5095	52.7109	47.7188	42.4005
ENSCSAG00000004948	DCUN1D4		149.964	0.192794	0.162677	1.18523	0.235928	0.609564	0.235928	0.609564	166.619	163.99	116.741	152.505
ENSCSAG00000016601	DHX15	DEAH-box helicase 15	709.158	0.192675	0.128979	1.49401	0.135173	0.48849	0.135173	0.48849	777.077	755.524	626.309	677.724
ENSCSAG00000016944	TNFAIP3	TNF alpha induced protein 3	19.2395	0.192666	0.151137	1.27803	0.201239	NA	0.201239	1	25.8547	22.2557	14.4861	14.3615
ENSCSAG00000011484	MAPK8IP3	mitogen-activated protein kinase 8 interacting protein 3	94.0268	0.192601	0.16997	1.13499	0.256379	0.624282	0.256379	0.624282	123.528	86.6802	88.6206	77.2783
ENSCSAG00000002372	MSANTD2		41.816	0.192504	0.169817	1.13437	0.256638	NA	0.256638	1	47.4003	49.1969	35.7891	34.8778
ENSCSAG00000014130	LGR6		270.621	0.192473	0.158676	1.21404	0.224732	0.596927	0.224732	0.596927	363.402	230.757	256.488	231.835
ENSCSAG00000012995	SLC25A13		463.169	0.192366	0.135691	1.41787	0.156228	0.52024	0.156228	0.52024	488.366	514.225	419.244	430.844
ENSCSAG00000003383	RPL27	ribosomal protein L27	2032.75	0.192322	0.117254	1.64032	0.100939	0.433538	0.100939	0.433538	2266.59	2111.95	1867	1885.45
ENSCSAG00000013665	UACA		204.73	0.192295	0.154431	1.24533	0.21301	0.584603	0.21301	0.584603	206.838	240.128	183.206	188.751
ENSCSAG00000017549	VAPA	VAMP associated protein A	675.666	0.192278	0.14027	1.37069	0.170473	0.540791	0.170473	0.540791	686.586	778.951	536.836	700.292
ENSCSAG00000001738		ribosomal protein L28	3074.8	0.191977	0.114147	1.68188	0.0925921	0.419049	0.0925921	0.419049	3230.4	3386.39	2812.85	2869.55
ENSCSAG00000007101	GXYLT1	glucoside xylosyltransferase 1	157.961	0.191887	0.162758	1.17905	0.238379	0.609631	0.238379	0.609631	146.51	200.302	151.678	133.356
ENSCSAG00000009091	RHPN1	rhophilin Rho GTPase binding protein 1	28.6341	0.191838	0.158516	1.21706	0.223581	NA	0.223581	1	47.4003	22.2557	26.4158	18.4647
ENSCSAG00000010983	RASSF7	Ras association domain family member 7	58.8369	0.191801	0.171475	1.12144	0.2621	NA	0.2621	1	80.4368	53.8823	57.9442	43.0844
ENSCSAG00000013368	MPP5	membrane palmitoylated protein 5	257.139	0.1918	0.148858	1.28868	0.19751	0.57085	0.19751	0.57085	264.292	295.181	231.777	237.306
ENSCSAG00000012255	WDR24	WD repeat domain 24	67.7912	0.191793	0.171599	1.1184	0.263398	NA	0.263398	1	70.3822	81.9948	64.7612	54.0264
ENSCSAG00000015800	NRG1		47.9034	0.191752	0.170363	1.1252	0.260504	NA	0.260504	1	43.0911	66.7672	43.4582	38.2972
ENSCSAG00000009917	LRRC6	leucine rich repeat containing 6	23.6903	0.191603	0.153613	1.24624	0.212675	NA	0.212675	1	17.2365	40.9974	18.7467	17.7808
ENSCSAG00000013350	SRBD1	S1 RNA binding domain 1	167.874	0.191532	0.157775	1.21449	0.22456	0.596927	0.22456	0.596927	182.419	185.074	154.234	149.769
ENSCSAG00000011482	MEMO1		137.617	0.191502	0.162855	1.17613	0.239543	0.6102	0.239543	0.6102	150.819	152.276	113.332	134.04
ENSCSAG00000017378	CEP162		38.004	0.191465	0.165916	1.15224	0.249221	NA	0.249221	1	41.6548	48.0255	21.303	41.0327
ENSCSAG00000010465	PIK3R4	phosphoinositide-3-kinase regulatory subunit 4	179.915	0.191341	0.161641	1.1835	0.236611	0.609631	0.236611	0.609631	189.601	206.158	133.783	190.118
ENSCSAG00000003704	RAB30	RAB30, member RAS oncogene family	15.9921	0.19126	0.144193	1.33054	0.183339	NA	0.183339	1	18.6728	22.2557	12.7818	10.2582
ENSCSAG00000003702	PCF11	PCF11 cleavage and polyadenylation factor subunit	224.186	0.191259	0.151274	1.26487	0.205919	0.577962	0.205919	0.577962	248.492	240.128	207.065	201.06
ENSCSAG00000002900	CDT1	chromatin licensing and DNA replication factor 1	115.747	0.191252	0.16675	1.14818	0.250895	0.620569	0.250895	0.620569	146.51	110.107	103.107	103.266
ENSCSAG00000004218	DHX38	DEAH-box helicase 38	149.942	0.191146	0.161734	1.18294	0.236832	0.609631	0.236832	0.609631	180.983	148.762	141.452	128.569
ENSCSAG00000007674	MBOAT1	membrane bound O-acyltransferase domain containing 1	89.5588	0.191132	0.171389	1.11405	0.265257	0.634511	0.265257	0.634511	71.8186	128.849	74.1345	83.4332
ENSCSAG00000006483	RAB3IL1	RAB3A interacting protein like 1	17.6172	0.191093	0.146908	1.30582	0.191614	NA	0.191614	1	27.2911	17.5703	11.9297	13.6776
ENSCSAG00000009119	MAP2K4		296.915	0.191086	0.147847	1.29247	0.196195	0.568372	0.196195	0.568372	291.583	353.749	263.305	279.022
ENSCSAG00000005067	RHBDF2		45.5208	0.191051	0.170157	1.1252	0.260505	NA	0.260505	1	61.764	43.3401	40.0497	36.9294
ENSCSAG00000006761	PRKCSH	protein kinase C substrate 80K-H	925.897	0.19101	0.137203	1.39249	0.163774	0.532202	0.163774	0.532202	1060.04	944.112	962.897	736.537
ENSCSAG00000019100	H1-1	H1.1 linker histone, cluster member	182.671	0.190981	0.157607	1.21258	0.225289	0.597602	0.225289	0.597602	203.965	195.616	180.65	150.453
ENSCSAG00000018968	TMEM200A	transmembrane protein 200A	136.705	0.19098	0.169098	1.12878	0.258992	0.628555	0.258992	0.628555	106.291	196.788	126.114	117.627
ENSCSAG00000017718	FAM50A	family with sequence similarity 50 member A	122.012	0.190842	0.166355	1.14863	0.250708	0.620347	0.250708	0.620347	147.946	121.821	121.853	96.4269
ENSCSAG00000010313	SPRTN	SprT-like N-terminal domain	61.3603	0.190796	0.171716	1.11023	0.266901	NA	0.266901	1	54.5821	84.3375	51.1273	55.3942
ENSCSAG00000010863	ALOX12B	arachidonate 12-lipoxygenase, 12R type	22.6177	0.190792	0.146012	1.31717	0.187783	NA	0.187783	1	24.4183	32.7979	26.4158	6.83879
ENSCSAG00000014617	CCNC	cyclin C	257.827	0.190448	0.149509	1.27398	0.202671	0.574885	0.202671	0.574885	274.347	286.982	218.995	250.983
ENSCSAG00000004514	PDPR		97.8211	0.190442	0.169947	1.1219	0.261906	0.632474	0.261906	0.632474	106.291	111.279	103.959	69.7556
ENSCSAG00000017096	PLAGL1	PLAG1 like zinc finger 1	235.515	0.190353	0.15656	1.21555	0.224157	0.596927	0.224157	0.596927	216.892	297.524	198.544	229.099
ENSCSAG00000011871	GNAI1	G protein subunit alpha i1	341.642	0.190341	0.142402	1.3369	0.181254	0.551751	0.181254	0.551751	373.457	367.805	299.094	326.21
ENSCSAG00000003552	AXL		2187.36	0.190131	0.117521	1.61794	0.105675	0.44138	0.105675	0.44138	2371.45	2335.68	2109	1933.33
ENSCSAG00000003636	KIF18B		47.2542	0.190069	0.170719	1.11511	0.264802	NA	0.264802	1	61.764	46.8542	40.0497	40.3488
ENSCSAG00000019395	ZNF672	zinc finger protein 672	82.5075	0.190041	0.170659	1.11516	0.264781	NA	0.264781	1	106.291	78.4807	74.1345	71.1234
ENSCSAG00000015589	MAEA	macrophage erythroblast attacher, E3 ubiquitin ligase	332.46	0.189897	0.14594	1.30172	0.193011	0.565392	0.193011	0.565392	361.966	359.606	334.031	274.235
ENSCSAG00000016034	ZSWIM6		88.8906	0.189763	0.170219	1.11449	0.265071	0.634511	0.265071	0.634511	81.8732	115.964	78.3951	79.3299
ENSCSAG00000004179	NOL11	nucleolar protein 11	548.647	0.189716	0.135662	1.39882	0.161866	0.529644	0.161866	0.529644	607.585	578.649	541.949	466.405
ENSCSAG00000000609		60S ribosomal protein L37a-like	263.441	0.189674	0.153032	1.23988	0.215019	0.586138	0.215019	0.586138	318.874	256.527	216.439	261.926
ENSCSAG00000012570	MYNN	myoneurin	94.9789	0.189543	0.169763	1.11592	0.264455	0.634473	0.264455	0.634473	91.9278	119.478	74.1345	94.3753
ENSCSAG00000008328	DRG2	developmentally regulated GTP binding protein 2	123.359	0.189506	0.164961	1.14972	0.250258	0.620036	0.250258	0.620036	149.383	122.992	108.219	112.84
ENSCSAG00000007428	DENND5B	DENN domain containing 5B	707.056	0.189453	0.131226	1.44376	0.148807	0.508394	0.148807	0.508394	711.004	815.263	633.126	668.833
ENSCSAG00000006782			49.0461	0.189295	0.168917	1.11869	0.263273	NA	0.263273	1	35.9093	77.3094	39.1976	43.7682
ENSCSAG00000011741	SPTLC2		215.246	0.189239	0.153776	1.2314	0.218173	0.589907	0.218173	0.589907	254.238	215.529	201.101	190.118
ENSCSAG00000008380	NHEJ1	non-homologous end joining factor 1	27.7719	0.189206	0.1621	1.16904	0.24239	NA	0.24239	1	35.9093	30.4552	22.1551	22.568
ENSCSAG00000013992	SLC25A25	solute carrier family 25 member 25	62.4298	0.189173	0.17177	1.10354	0.269792	NA	0.269792	1	80.4368	60.9104	60.5006	47.8715
ENSCSAG00000009071	ZNF346	zinc finger protein 346	70.2579	0.189108	0.171722	1.10234	0.270312	NA	0.270312	1	93.3642	65.5958	53.6836	68.3879
ENSCSAG00000005690	SIN3B	SIN3 transcription regulator family member B	289.149	0.189027	0.146965	1.2868	0.198165	0.571769	0.198165	0.571769	324.62	303.381	280.348	248.248
ENSCSAG00000004761	RHPN2	rhophilin Rho GTPase binding protein 2	762.999	0.18882	0.127884	1.47675	0.139744	0.496889	0.139744	0.496889	835.968	809.406	730.268	676.356
ENSCSAG00000017018	SLCO3A1		55.4922	0.188793	0.171624	1.09988	0.271386	NA	0.271386	1	61.764	64.4245	41.7539	54.0264
ENSCSAG00000015192	VCPKMT	valosin containing protein lysine methyltransferase	45.4815	0.188765	0.17058	1.10682	0.268374	NA	0.268374	1	51.7094	52.7109	35.7891	41.7166
ENSCSAG00000005345	ELL	elongation factor for RNA polymerase II	55.7176	0.188764	0.171647	1.10157	0.270647	NA	0.270647	1	70.3822	56.225	51.1273	45.136
ENSCSAG00000009799	IGF2	insulin like growth factor 2	82.0006	0.18875	0.171715	1.09794	0.272233	NA	0.272233	1	57.4549	127.678	72.4303	70.4395
ENSCSAG00000015916	FBXO16		24.5614	0.188731	0.156935	1.20077	0.229839	NA	0.229839	1	25.8547	33.9693	14.4861	23.9358
ENSCSAG00000012162	GFM1	G elongation factor mitochondrial 1	288.081	0.188664	0.145777	1.29443	0.195517	0.568228	0.195517	0.568228	303.074	322.122	259.045	268.08
ENSCSAG00000011413	RPS6KA5	ribosomal protein S6 kinase A5	118.476	0.188593	0.166363	1.13377	0.256892	0.624897	0.256892	0.624897	113.473	147.591	111.628	101.214
ENSCSAG00000008164	UTP14A	UTP14A small subunit processome component	38.1254	0.188501	0.168382	1.12125	0.262179	NA	0.262179	1	48.8366	39.826	32.3806	31.4584
ENSCSAG00000006470	NECTIN3	nectin cell adhesion molecule 3	200.882	0.188389	0.156702	1.20215	0.229304	0.602995	0.229304	0.602995	208.274	230.757	162.755	201.744
ENSCSAG00000006982	NSDHL	NAD(P) dependent steroid dehydrogenase-like	116.157	0.18838	0.165275	1.1406	0.254035	0.623911	0.254035	0.623911	130.71	125.335	107.367	101.214
ENSCSAG00000012265	E2F1	E2F transcription factor 1	273.964	0.188246	0.151558	1.2429	0.213905	0.58484	0.213905	0.58484	333.238	263.555	265.862	233.203
ENSCSAG00000016009			19.4455	0.188202	0.148437	1.26866	0.204563	NA	0.204563	1	15.8001	32.7979	16.1903	12.9937
ENSCSAG00000017651	ESCO1	establishment of sister chromatid cohesion N-acetyltransferase 1	231.5	0.187788	0.15277	1.2293	0.218958	0.590581	0.218958	0.590581	245.62	258.869	191.727	229.783
ENSCSAG00000011723	CDC45	cell division cycle 45	124.972	0.187646	0.165411	1.13568	0.25609	0.624282	0.25609	0.624282	155.128	120.649	116.741	107.369
ENSCSAG00000016248	STK32B	serine/threonine kinase 32B	94.4656	0.187465	0.168526	1.11279	0.2658	0.635329	0.2658	0.635329	99.1096	110.107	85.2121	83.4332
ENSCSAG00000012208			40.3857	0.187426	0.165102	1.13268	0.257348	NA	0.257348	1	40.2184	55.0537	20.4509	45.8199
ENSCSAG00000018511	NFIL3	nuclear factor, interleukin 3 regulated	39.9565	0.187399	0.168546	1.11111	0.26652	NA	0.26652	1	37.3457	55.0537	33.2327	34.1939
ENSCSAG00000014803	TXLNG		66.869	0.187385	0.171544	1.09259	0.274575	NA	0.274575	1	70.3822	79.6521	57.9442	59.4974
ENSCSAG00000004114	UTP4		193.412	0.187353	0.159448	1.17492	0.240027	0.6102	0.240027	0.6102	208.274	215.529	147.417	202.428
ENSCSAG00000001343	ALG6	ALG6 alpha-1,3-glucosyltransferase	62.4238	0.187316	0.171767	1.0902	0.275625	NA	0.275625	1	64.6367	76.138	49.423	59.4974
ENSCSAG00000010418	CEP250	centrosomal protein 250	184.919	0.187307	0.159962	1.17205	0.241176	0.611103	0.241176	0.611103	219.765	185.074	189.171	145.666
ENSCSAG00000008982	PLAU		88.9484	0.187297	0.16983	1.10435	0.269442	0.638838	0.269442	0.638838	107.728	90.1943	86.0642	71.8073
ENSCSAG00000011865			8.44998	0.18717	0.11595	1.63546	0.101952	NA	0.101952	1	7.18186	17.5703	4.26061	4.78715
ENSCSAG00000014506	LNPK	lunapark, ER junction formation factor	173.811	0.187156	0.156963	1.19287	0.232922	0.606459	0.232922	0.606459	191.037	188.588	157.642	157.976
ENSCSAG00000003430	SMAD1	SMAD family member 1	43.6292	0.187151	0.169026	1.1058	0.268812	NA	0.268812	1	37.3457	63.2531	34.937	38.9811
ENSCSAG00000006087	AKAP8L		108.115	0.187149	0.166639	1.12332	0.261302	0.631569	0.261302	0.631569	112.037	126.506	95.4376	98.4785
ENSCSAG00000006988			263.548	0.187148	0.149391	1.25282	0.210271	0.582226	0.210271	0.582226	272.911	299.867	224.96	256.455
ENSCSAG00000014998	GAD1	glutamate decarboxylase 1	10.5504	0.186977	0.126753	1.48737	0.136918	NA	0.136918	1	11.491	17.5703	7.66909	5.47103
ENSCSAG00000017568	MTCL1		128.897	0.186927	0.166072	1.12703	0.259729	0.629618	0.259729	0.629618	165.183	119.478	123.558	107.369
ENSCSAG00000002749	HSD17B7		74.1068	0.186721	0.171006	1.09256	0.274586	NA	0.274586	1	86.1823	79.6521	62.2048	68.3879
ENSCSAG00000006129	BRD4	bromodomain containing 4	255.603	0.186708	0.149677	1.24766	0.212157	0.584149	0.212157	0.584149	258.547	296.353	241.15	226.364
ENSCSAG00000002099	LMNA	lamin A/C	1655.37	0.186656	0.141782	1.31674	0.187925	0.562177	0.187925	0.562177	2069.81	1514.56	1711.06	1326.04
ENSCSAG00000017069	FHL2	four and a half LIM domains 2	466.14	0.186584	0.136663	1.36555	0.172079	0.541715	0.172079	0.541715	522.839	484.941	411.574	445.205
ENSCSAG00000004906		zinc finger protein 675	28.5442	0.18648	0.153794	1.20921	0.226583	NA	0.226583	1	17.2365	52.7109	16.1903	28.039
ENSCSAG00000017676	RNF216	ring finger protein 216	400.832	0.186453	0.139003	1.34175	0.179678	0.549455	0.179678	0.549455	452.457	414.659	368.968	367.243
ENSCSAG00000009553	FMN2		13.5632	0.186448	0.135962	1.37335	0.169644	NA	0.169644	1	17.2365	18.7417	5.96485	12.3098
ENSCSAG00000009656			183.827	0.186252	0.158071	1.17921	0.238315	0.609631	0.238315	0.609631	224.074	178.046	170.424	162.763
ENSCSAG00000011407	ZMYM3	zinc finger MYM-type containing 3	309.372	0.186177	0.145504	1.27998	0.200554	0.573617	0.200554	0.573617	331.802	338.521	302.503	264.661
ENSCSAG00000000925	ASAP3	ArfGAP with SH3 domain, ankyrin repeat and PH domain 3	44.6443	0.186121	0.17033	1.09342	0.274209	NA	0.274209	1	54.5821	48.0255	34.937	41.0327
ENSCSAG00000006537	PTCH1	protein patched homolog 1	224.997	0.186104	0.15204	1.22448	0.220771	0.591872	0.220771	0.591872	255.674	234.271	195.988	214.054
ENSCSAG00000007934	TSPAN15	tetraspanin 15	117.303	0.186051	0.165132	1.12716	0.259674	0.629618	0.259674	0.629618	130.71	127.678	101.402	109.421
ENSCSAG00000016766	TEP1	telomerase associated protein 1	110.68	0.185968	0.16686	1.11473	0.264965	0.634511	0.264965	0.634511	109.164	134.706	103.107	95.743
ENSCSAG00000001162	FOXJ3	forkhead box J3	205.895	0.185872	0.15787	1.17712	0.239147	0.6102	0.239147	0.6102	202.528	247.156	165.311	208.583
ENSCSAG00000012793	RUNX1T1		15.856	0.185779	0.143817	1.29737	0.194503	NA	0.194503	1	22.9819	17.5703	11.9297	10.9421
ENSCSAG00000017662	THSD1	thrombospondin type 1 domain containing 1	41.2887	0.185698	0.169546	1.09528	0.273394	NA	0.273394	1	45.9639	49.1969	32.3806	37.6133
ENSCSAG00000003826	SUPT5H	SPT5 homolog, DSIF elongation factor subunit	579.107	0.185682	0.137484	1.35099	0.176698	0.546953	0.176698	0.546953	660.731	590.363	581.147	484.186
ENSCSAG00000013528			243.232	0.185399	0.150521	1.23232	0.217829	0.589907	0.217829	0.589907	282.965	245.984	222.404	221.577
ENSCSAG00000008121	SF3B2	splicing factor 3b subunit 2	751.924	0.185171	0.138482	1.33751	0.181056	0.551535	0.181056	0.551535	856.077	768.408	781.395	601.813
ENSCSAG00000004329	HYDIN	HYDIN axonemal central pair apparatus protein	10.3936	0.185162	0.124732	1.50723	0.131752	NA	0.131752	1	17.2365	11.7135	8.52121	4.10327
ENSCSAG00000014343	SLC38A3	solute carrier family 38 member 3	9.099	0.185135	0.12156	1.53844	0.123942	NA	0.123942	1	12.9273	12.8849	5.11273	5.47103
ENSCSAG00000003850	LRRIQ1		37.2234	0.185014	0.163041	1.13172	0.257754	NA	0.257754	1	25.8547	62.0818	24.7115	36.2456
ENSCSAG00000012661	ZNF410	zinc finger protein 410	176.387	0.184963	0.157168	1.17758	0.238963	0.6102	0.238963	0.6102	201.092	183.903	165.311	155.24
ENSCSAG00000014623	FAM172A		43.1367	0.184893	0.169661	1.08957	0.275901	NA	0.275901	1	50.273	49.1969	30.6764	42.4005
ENSCSAG00000001400	MIGA1	mitoguardin 1	180.782	0.184778	0.160615	1.15054	0.249921	0.620036	0.249921	0.620036	205.401	190.931	138.044	188.751
ENSCSAG00000011150	TEX10		153.109	0.184692	0.16222	1.1383	0.254994	0.624282	0.254994	0.624282	147.946	187.417	128.67	148.402
ENSCSAG00000015669	NELFA	negative elongation factor complex member A	115.714	0.184684	0.165635	1.1156	0.264595	0.634473	0.264595	0.634473	122.092	132.363	109.924	98.4785
ENSCSAG00000006853	KLF13	Kruppel like factor 13	27.4479	0.184538	0.160237	1.1513	0.249609	NA	0.249609	1	24.4183	40.9974	23.8594	20.5164
ENSCSAG00000014231	RBM45	RNA binding motif protein 45	82.6483	0.184531	0.170644	1.08183	0.27933	NA	0.27933	1	99.1096	85.5089	63.9091	82.0654
ENSCSAG00000001351	JAK1	Janus kinase 1	377.045	0.184521	0.140337	1.31524	0.188429	0.562177	0.188429	0.562177	426.602	388.89	345.961	346.726
ENSCSAG00000002949	SORBS2		191.149	0.184514	0.159677	1.15534	0.247953	0.619244	0.247953	0.619244	196.783	221.386	147.417	199.009
ENSCSAG00000007903		PWP2 small subunit processome component	169.141	0.184484	0.160412	1.15107	0.249701	0.620036	0.249701	0.620036	195.347	174.532	171.276	135.408
ENSCSAG00000005253	PAX6	paired box 6	119.618	0.184376	0.168087	1.09631	0.272941	0.642433	0.272941	0.642433	103.419	160.476	103.107	111.472
ENSCSAG00000002654	CWC25	CWC25 spliceosome associated protein homolog	2733.49	0.184254	0.171414	1.07549	0.282156	0.651909	0.282156	0.651909	3514.8	2605.09	2810.3	2003.76
ENSCSAG00000015806	PRKD1		103.124	0.184025	0.168241	1.0936	0.274128	0.643327	0.274128	0.643327	106.291	121.821	81.8036	102.582
ENSCSAG00000001309		maestro heat like repeat family member 7	8.44003	0.183965	0.117507	1.59109	0.111588	NA	0.111588	1	11.491	12.8849	5.96485	3.41939
ENSCSAG00000016001	IPO11		80.4109	0.183952	0.170914	1.07601	0.281924	NA	0.281924	1	74.6913	104.251	71.5782	71.1234
ENSCSAG00000009839	PPARG	peroxisome proliferator activated receptor gamma	199.183	0.183862	0.153951	1.19476	0.232181	0.605356	0.232181	0.605356	215.456	217.872	184.91	178.492
ENSCSAG00000007079	KATNBL1	katanin regulatory subunit B1 like 1	52.2285	0.18386	0.171436	1.07385	0.282892	NA	0.282892	1	66.0731	52.7109	44.3103	45.8199
ENSCSAG00000001469	GFI1		9.95763	0.183572	0.122386	1.52183	0.128053	NA	0.128053	1	11.491	16.399	8.52121	3.41939
ENSCSAG00000016624	EPB41L2		50.7871	0.183568	0.169818	1.08274	0.278924	NA	0.278924	1	51.7094	64.4245	56.24	30.7745
ENSCSAG00000017751	TECPR1	tectonin beta-propeller repeat containing 1	60.1422	0.183382	0.171624	1.071	0.284167	NA	0.284167	1	77.5641	58.5677	61.3527	43.0844
ENSCSAG00000005425	LONP2		136.227	0.183373	0.164294	1.11712	0.263945	0.634008	0.263945	0.634008	170.928	128.849	119.297	125.834
ENSCSAG00000000965	PDIK1L	PDLIM1 interacting kinase 1 like	70.5917	0.18329	0.171319	1.07024	0.28451	NA	0.28451	1	73.2549	84.3375	63.9091	60.8652
ENSCSAG00000009881	ZC3HC1		58.5469	0.183237	0.171762	1.06731	0.285833	NA	0.285833	1	60.3276	71.4526	54.5357	47.8715
ENSCSAG00000004748	GRK5	G protein-coupled receptor kinase 5	50.7754	0.183236	0.171207	1.07204	0.283704	NA	0.283704	1	60.3276	55.0537	49.423	38.2972
ENSCSAG00000015489	BRMS1L	BRMS1 like transcriptional repressor	113.696	0.183109	0.165819	1.105	0.26916	0.638594	0.26916	0.638594	132.146	118.307	99.6982	104.633
ENSCSAG00000014891	METTL8	methyltransferase like 8	59.8944	0.182938	0.17174	1.0658	0.286513	NA	0.286513	1	74.6913	60.9104	45.1624	58.8136
ENSCSAG00000000850	ARHGEF19	Rho guanine nucleotide exchange factor 19	39.2418	0.182936	0.167526	1.09511	0.273469	NA	0.273469	1	57.4549	33.9693	34.0848	31.4584
ENSCSAG00000016302	RNF217		98.6996	0.182915	0.168079	1.08839	0.276423	0.645838	0.276423	0.645838	101.982	115.964	85.2121	91.6397
ENSCSAG00000005122	MAU2	MAU2 sister chromatid cohesion factor	92.0714	0.182909	0.170232	1.07579	0.28202	0.651909	0.28202	0.651909	122.092	83.1662	77.543	85.4848
ENSCSAG00000009564	PTK2		805.672	0.182793	0.129502	1.41159	0.158071	0.524395	0.158071	0.524395	870.441	864.459	691.07	796.719
ENSCSAG00000007502			69.3502	0.182715	0.171774	1.06248	0.288019	NA	0.288019	1	64.6367	91.3656	50.2751	71.1234
ENSCSAG00000007933	KCNJ8	potassium inwardly rectifying channel subfamily J member 8	743.218	0.182668	0.137123	1.33207	0.182837	0.553497	0.182837	0.553497	722.495	880.858	625.457	744.06
ENSCSAG00000001041	SPOCD1		14.1469	0.18252	0.13875	1.31927	0.187078	NA	0.187078	1	14.3637	22.2557	11.0776	8.89042
ENSCSAG00000011693	KIF16B		164.379	0.182466	0.160811	1.13552	0.256159	0.624282	0.256159	0.624282	180.983	178.046	167.868	130.621
ENSCSAG00000004156	INPPL1	inositol polyphosphate phosphatase like 1	406.086	0.182465	0.14504	1.25863	0.208164	0.580192	0.208164	0.580192	494.112	385.376	391.976	352.881
ENSCSAG00000009416	SUSD5		97.8291	0.182328	0.16804	1.08591	0.277518	0.647001	0.277518	0.647001	110.601	105.422	91.177	84.1171
ENSCSAG00000008394	C11orf80		45.0143	0.182277	0.168491	1.08018	0.280062	NA	0.280062	1	34.4729	69.1099	37.4933	38.9811
ENSCSAG00000012232	CYP1B1	cytochrome P450 family 1 subfamily B member 1	16.711	0.182242	0.145338	1.25766	0.208515	NA	0.208515	1	18.6728	23.4271	14.4861	10.2582
ENSCSAG00000009442	DDX11	DEAD/H-box helicase 11	78.2367	0.18224	0.171308	1.06571	0.286555	NA	0.286555	1	96.2369	78.4807	80.0994	58.1297
ENSCSAG00000013418	ZNF451	zinc finger protein 451	256.982	0.18219	0.15092	1.20718	0.227364	0.600639	0.227364	0.600639	261.42	296.353	216.439	253.719
ENSCSAG00000015710	CCM2	CCM2 scaffold protein	69.5917	0.182179	0.171644	1.06194	0.288264	NA	0.288264	1	86.1823	70.2813	52.8315	69.0717
ENSCSAG00000006777	TMEM117		134.765	0.182176	0.164967	1.10424	0.269489	0.638838	0.269489	0.638838	146.51	149.933	103.107	139.511
ENSCSAG00000014019	IGF2BP2	insulin like growth factor 2 mRNA binding protein 2	328.558	0.182153	0.144021	1.26493	0.205896	0.577962	0.205896	0.577962	331.802	378.347	305.911	298.171
ENSCSAG00000009599	FOCAD		241.216	0.182111	0.15196	1.19917	0.230463	0.604073	0.230463	0.604073	281.529	242.47	234.333	206.531
ENSCSAG00000012367	MATN2		357.233	0.182026	0.142387	1.27879	0.200972	0.574064	0.200972	0.574064	410.802	361.948	320.398	335.784
ENSCSAG00000001586	CTTNBP2NL	CTTNBP2 N-terminal like	342.531	0.181937	0.148056	1.22869	0.219188	0.590602	0.219188	0.590602	333.238	408.803	285.461	342.623
ENSCSAG00000006645	ATG3	autophagy related 3	78.5102	0.18193	0.171296	1.06189	0.288287	NA	0.288287	1	89.055	86.6802	56.24	82.0654
ENSCSAG00000004043	C2CD3		159.445	0.181759	0.16378	1.10926	0.267318	0.637032	0.267318	0.637032	147.946	201.473	126.966	161.395
ENSCSAG00000012576			29.4148	0.181651	0.16357	1.11067	0.266709	NA	0.266709	1	33.0365	36.312	23.0073	25.3035
ENSCSAG00000001561	SLC6A17	solute carrier family 6 member 17	84.1674	0.181376	0.16995	1.06803	0.285509	NA	0.285509	1	99.1096	87.8516	72.4303	77.2783
ENSCSAG00000009168	AGBL3	ATP/GTP binding protein like 3	5.91791	0.181345	0.101646	1.85244	0.0639624	NA	0.0639624	1	7.18186	11.7135	3.40848	1.36776
ENSCSAG00000012540	ARID3A		58.0643	0.181268	0.171612	1.05802	0.290048	NA	0.290048	1	79.0004	52.7109	48.5709	51.9748
ENSCSAG00000005096	GATAD2A	GATA zinc finger domain containing 2A	416.446	0.181268	0.140963	1.28637	0.198313	0.571891	0.198313	0.571891	491.239	408.803	383.454	382.288
ENSCSAG00000014919	RPS23	ribosomal protein S23	371.265	0.181118	0.14672	1.2344	0.217053	0.589399	0.217053	0.589399	390.693	413.488	296.538	384.34
ENSCSAG00000003305	FHDC1		14.0107	0.181101	0.139459	1.30361	0.192367	NA	0.192367	1	18.6728	17.5703	10.2255	9.5743
ENSCSAG00000001929	UBAP2L		435.537	0.181057	0.13823	1.30991	0.190226	0.56393	0.190226	0.56393	451.021	488.455	383.454	419.218
ENSCSAG00000012431	THUMPD2		70.5424	0.181039	0.171414	1.05736	0.290347	NA	0.290347	1	87.6187	70.2813	61.3527	62.9168
ENSCSAG00000003342	ZNF224		98.9226	0.181033	0.168469	1.07443	0.282628	0.651909	0.282628	0.651909	97.6733	120.649	84.36	93.0075
ENSCSAG00000003064	NEIL3	nei like DNA glycosylase 3	52.1865	0.180919	0.17151	1.05497	0.29144	NA	0.29144	1	56.0185	62.0818	43.4582	47.1876
ENSCSAG00000006342	DDX39A	DExD-box helicase 39A	323.784	0.180868	0.14378	1.25844	0.208234	0.580192	0.208234	0.580192	366.275	333.836	305.059	289.965
ENSCSAG00000017859		desmoglein 2	273.482	0.180814	0.148799	1.21535	0.224232	0.596927	0.224232	0.596927	300.202	292.839	230.073	270.816
ENSCSAG00000010488	ASTE1		33.6545	0.180745	0.162687	1.10825	0.267753	NA	0.267753	1	31.6002	48.0255	18.7467	36.2456
ENSCSAG00000001552	AMPD2	adenosine monophosphate deaminase 2	216.845	0.180726	0.155591	1.16225	0.245132	0.61668	0.245132	0.61668	237.001	234.271	222.404	173.705
ENSCSAG00000017432	AHRR		62.8983	0.180723	0.171756	1.05205	0.292776	NA	0.292776	1	67.5095	73.7953	49.423	60.8652
ENSCSAG00000003143	PALLD		462.932	0.18062	0.138551	1.30366	0.192349	0.565392	0.192349	0.565392	472.566	525.938	400.497	452.728
ENSCSAG00000013602	KIF23	kinesin family member 23	211.416	0.180564	0.152572	1.18389	0.236459	0.609631	0.236459	0.609631	226.947	231.928	195.988	190.802
ENSCSAG00000012267	PRKN		21.424	0.18054	0.153426	1.18172	0.237316	NA	0.237316	1	30.1638	22.2557	19.5988	13.6776
ENSCSAG00000001439	SH3GLB1	SH3 domain containing GRB2 like, endophilin B1	168.533	0.180504	0.15779	1.14446	0.252432	0.62314	0.252432	0.62314	188.165	179.217	150.825	155.924
ENSCSAG00000006293	ALCAM		137.936	0.180397	0.163873	1.10064	0.271055	0.640477	0.271055	0.640477	132.146	169.846	118.445	131.305
ENSCSAG00000014589			69.5207	0.180312	0.170575	1.05557	0.291166	NA	0.291166	1	74.6913	84.3375	34.937	84.1171
ENSCSAG00000015139	PIGG	phosphatidylinositol glycan anchor biosynthesis class G	184.862	0.180302	0.157755	1.14289	0.253083	0.623332	0.253083	0.623332	189.601	213.186	153.382	183.279
ENSCSAG00000006043			176.346	0.180261	0.158804	1.13506	0.256352	0.624282	0.256352	0.624282	170.928	213.186	155.086	166.183
ENSCSAG00000016730	SGK1	serum/glucocorticoid regulated kinase 1	28.2357	0.180122	0.161409	1.11473	0.264966	NA	0.264966	1	25.8547	40.9974	22.1551	23.9358
ENSCSAG00000012616		cytochrome c oxidase subunit 7A2 like	412.679	0.180114	0.137602	1.30923	0.190456	0.564091	0.190456	0.564091	448.148	441.601	380.046	380.92
ENSCSAG00000006554		actin related protein 3B	37.222	0.179918	0.168172	1.07011	0.284568	NA	0.284568	1	40.2184	45.6828	31.5285	31.4584
ENSCSAG00000008451		tight junction protein 2	63.5391	0.179914	0.171722	1.04895	0.2942	NA	0.2942	1	73.2549	69.1099	60.5006	51.2909
ENSCSAG00000005520	ESPL1		361.636	0.179879	0.141438	1.27204	0.203357	0.574885	0.203357	0.574885	374.893	405.289	344.257	322.107
ENSCSAG00000011514	SHQ1		105.676	0.179739	0.167416	1.07458	0.282562	0.651909	0.282562	0.651909	117.782	114.793	103.959	86.1687
ENSCSAG00000001597	ZNF584		79.2887	0.179626	0.170928	1.05248	0.292578	NA	0.292578	1	100.546	76.138	74.1345	66.3362
ENSCSAG00000008015			12.4126	0.179567	0.132355	1.36594	0.171958	NA	0.171958	1	21.5456	11.7135	6.81697	9.5743
ENSCSAG00000001504	MFSD14A		234.494	0.179513	0.1516	1.18427	0.236305	0.609631	0.236305	0.609631	249.929	258.869	199.396	229.783
ENSCSAG00000006640	CHPF2	chondroitin polymerizing factor 2	56.3013	0.17943	0.17117	1.05113	0.2932	NA	0.2932	1	77.5641	50.3682	56.24	41.0327
ENSCSAG00000017493	PCCA	propionyl-CoA carboxylase subunit alpha	78.1965	0.179173	0.170559	1.05104	0.293242	NA	0.293242	1	83.3095	90.1943	71.5782	67.704
ENSCSAG00000006596	ERCC6L2	ERCC excision repair 6 like 2	256.254	0.17915	0.151499	1.18245	0.237028	0.609631	0.237028	0.609631	255.674	299.867	216.439	253.035
ENSCSAG00000014610	DSTYK	dual serine/threonine and tyrosine protein kinase	62.2919	0.179144	0.171649	1.04528	0.295895	NA	0.295895	1	67.5095	72.624	67.3176	41.7166
ENSCSAG00000002191	APLP2	amyloid beta precursor like protein 2	2645.1	0.178956	0.115635	1.54767	0.121702	0.464678	0.121702	0.464678	2934.51	2732.77	2466.89	2446.23
ENSCSAG00000017943	HSPH1	heat shock protein family H (Hsp110) member 1	344.567	0.178908	0.142683	1.25424	0.209754	0.581049	0.209754	0.581049	390.693	353.749	307.616	326.21
ENSCSAG00000016783	POLR1B	RNA polymerase I subunit B	250.484	0.178775	0.149199	1.19864	0.230668	0.604073	0.230668	0.604073	281.529	261.212	223.256	235.938
ENSCSAG00000011209			7.36204	0.178698	0.112426	1.61687	0.105906	NA	0.105906	1	10.0546	11.7135	4.26061	3.41939
ENSCSAG00000008275	RECQL4	RecQ like helicase 4	118.023	0.178608	0.168895	1.05925	0.289487	0.653436	0.289487	0.653436	149.383	111.279	125.262	86.1687
ENSCSAG00000016303	DARS1	aspartyl-tRNA synthetase 1	476.031	0.178605	0.137434	1.29964	0.193725	0.566788	0.193725	0.566788	499.857	525.938	409.87	468.457
ENSCSAG00000015804	NOP14	NOP14 nucleolar protein	309.03	0.178554	0.145505	1.22764	0.219583	0.590602	0.219583	0.590602	343.293	324.465	301.651	266.713
ENSCSAG00000000731	NPHP4		48.5988	0.178338	0.170842	1.04582	0.295643	NA	0.295643	1	58.8912	51.5396	47.7188	36.2456
ENSCSAG00000004397			45.6407	0.178233	0.170261	1.048	0.294638	NA	0.294638	1	48.8366	55.0537	45.1624	33.5101
ENSCSAG00000013471		minichromosome maintenance 8 homologous recombination repair factor	81.5818	0.178223	0.170374	1.04645	0.295351	NA	0.295351	1	93.3642	87.8516	66.4654	78.646
ENSCSAG00000011121		interferon related developmental regulator 1	120.392	0.17816	0.165354	1.0785	0.28081	0.650323	0.28081	0.650323	143.637	120.649	113.332	103.95
ENSCSAG00000013669	HSPA4	heat shock protein family A (Hsp70) member 4	690.27	0.178159	0.129883	1.37189	0.170097	0.540791	0.170097	0.540791	774.204	709.841	621.196	655.84
ENSCSAG00000015335	MICAL1		132.11	0.178072	0.163678	1.08801	0.27659	0.645931	0.27659	0.645931	139.328	149.933	109.924	129.253
ENSCSAG00000011796	EFNB1	ephrin B1	283.257	0.177939	0.153699	1.15853	0.246647	0.617788	0.246647	0.617788	357.657	257.698	273.531	244.145
ENSCSAG00000012710	TRDMT1	tRNA aspartic acid methyltransferase 1	32.6837	0.177733	0.165292	1.07471	0.282504	NA	0.282504	1	31.6002	44.5115	27.2679	27.3551
ENSCSAG00000014906	NTNG2		20.2262	0.177705	0.151795	1.16947	0.242213	NA	0.242213	1	21.5456	28.1125	12.7818	18.4647
ENSCSAG00000017836	WBP4	WW domain binding protein 4	54.413	0.177661	0.171525	1.0376	0.299455	NA	0.299455	1	70.3822	52.7109	49.423	45.136
ENSCSAG00000003660			54.7694	0.177646	0.170377	1.046	0.295563	NA	0.295563	1	81.8732	43.3401	52.8315	41.0327
ENSCSAG00000007997	ZKSCAN8	zinc finger protein with KRAB and SCAN domains 8	53.7568	0.17759	0.171519	1.03694	0.299765	NA	0.299765	1	68.9458	52.7109	46.8667	46.5037
ENSCSAG00000011420	RAD23B	RAD23 homolog B, nucleotide excision repair protein	369.989	0.177579	0.141185	1.25815	0.208339	0.580192	0.208339	0.580192	399.311	398.26	359.595	322.791
ENSCSAG00000004595	ZNF181		16.344	0.17751	0.143327	1.23785	0.215773	NA	0.215773	1	14.3637	26.9411	11.0776	12.9937
ENSCSAG00000007353	CCDC6	coiled-coil domain containing 6	131.296	0.177499	0.162989	1.08971	0.275842	0.645672	0.275842	0.645672	146.51	140.563	121.853	116.259
ENSCSAG00000001097	MAP7D1		507.305	0.177454	0.144401	1.22942	0.218916	0.590581	0.218916	0.590581	604.712	490.797	520.646	413.063
ENSCSAG00000012282	MAP3K4	mitogen-activated protein kinase kinase kinase 4	129.013	0.177431	0.16432	1.07977	0.280243	0.649809	0.280243	0.649809	126.401	155.79	114.184	119.679
ENSCSAG00000013397	MAP2K5	mitogen-activated protein kinase kinase 5	127.806	0.177375	0.164067	1.08119	0.279612	0.649451	0.279612	0.649451	132.146	147.591	109.071	122.414
ENSCSAG00000011850	RASGRP3	RAS guanyl releasing protein 3	128.685	0.177142	0.164191	1.07886	0.280648	0.650187	0.280648	0.650187	129.273	152.276	110.776	122.414
ENSCSAG00000009382	DPYSL5		124.121	0.177125	0.164178	1.07963	0.280309	0.649809	0.280309	0.649809	139.328	132.363	116.741	108.053
ENSCSAG00000009856	SNX17	sorting nexin 17	354.074	0.177125	0.149538	1.18518	0.235945	0.609564	0.235945	0.609564	435.221	331.493	352.778	296.803
ENSCSAG00000008925	NCAM2	neural cell adhesion molecule 2	30.7527	0.177097	0.160818	1.09831	0.272071	NA	0.272071	1	27.2911	45.6828	17.8945	32.1423
ENSCSAG00000009277	C3orf20	chromosome unknown C3orf20 homolog	16.6896	0.177084	0.14556	1.21689	0.223647	NA	0.223647	1	17.2365	24.5984	11.9297	12.9937
ENSCSAG00000001277	TUT4	terminal uridylyl transferase 4	348.281	0.17707	0.14548	1.21712	0.223559	0.596315	0.223559	0.596315	357.657	394.746	290.573	350.146
ENSCSAG00000010221	KIAA1671	KIAA1671 ortholog	67.1543	0.177021	0.171753	1.03234	0.301912	NA	0.301912	1	77.5641	72.624	69.8739	48.5554
ENSCSAG00000013987	MED14	mediator complex subunit 14	185.735	0.176975	0.162607	1.08784	0.276667	0.645931	0.276667	0.645931	173.801	231.928	142.304	194.905
ENSCSAG00000005467		ribosomal protein L18a	1919.08	0.176771	0.12688	1.39337	0.163509	0.531613	0.163509	0.531613	2230.69	1888.22	1907.9	1649.52
ENSCSAG00000012539	MECOM	MDS1 and EVI1 complex locus	94.284	0.176629	0.170102	1.03786	0.299335	0.662201	0.299335	0.662201	97.6733	111.279	69.0218	99.1624
ENSCSAG00000009722	INF2	inverted formin 2	197.989	0.176444	0.157638	1.12024	0.262611	0.632725	0.262611	0.632725	239.874	190.931	194.284	166.866
ENSCSAG00000013957	NEO1	neogenin 1	593.344	0.176339	0.130693	1.34945	0.177193	0.547055	0.177193	0.547055	634.876	639.559	550.47	548.471
ENSCSAG00000001895	TMC4		7.41405	0.176272	0.109979	1.62966	0.103173	NA	0.103173	1	5.74549	16.399	3.40848	4.10327
ENSCSAG00000006131	TROAP	trophinin associated protein	55.1991	0.176272	0.171545	1.02925	0.303362	NA	0.303362	1	64.6367	59.7391	55.3879	41.0327
ENSCSAG00000005225	ARMC6	armadillo repeat containing 6	95.075	0.176261	0.169121	1.04338	0.296774	0.660732	0.296774	0.660732	107.728	101.908	95.4376	75.2267
ENSCSAG00000006689	CFAP44	cilia and flagella associated protein 44	21.4851	0.176234	0.151529	1.16028	0.245936	NA	0.245936	1	18.6728	33.9693	12.7818	20.5164
ENSCSAG00000011970	ARVCF		148.664	0.176148	0.167169	1.05532	0.291281	0.655615	0.291281	0.655615	198.219	128.849	153.382	114.208
ENSCSAG00000014718	ADGRV1	adhesion G protein-coupled receptor V1	154.601	0.176016	0.159819	1.1016	0.270635	0.640115	0.270635	0.640115	160.874	175.703	138.896	142.931
ENSCSAG00000006083	PRPF40B		94.6801	0.176015	0.169603	1.03936	0.298637	0.661736	0.298637	0.661736	119.219	90.1943	92.0291	77.2783
ENSCSAG00000014548	PIK3C2B	phosphatidylinositol-4-phosphate 3-kinase catalytic subunit type 2 beta	79.8751	0.175937	0.170715	1.032	0.302071	NA	0.302071	1	97.6733	79.6521	75.8388	66.3362
ENSCSAG00000005951	ATF1	activating transcription factor 1	252.405	0.175919	0.152178	1.15602	0.247672	0.618885	0.247672	0.618885	267.165	279.954	205.361	257.138
ENSCSAG00000006595	UTP6	UTP6 small subunit processome component	243.898	0.175798	0.150506	1.16866	0.24254	0.613084	0.24254	0.613084	277.22	250.67	234.333	213.37
ENSCSAG00000007763	NBAS	NBAS subunit of NRZ tethering complex	229.402	0.17568	0.152414	1.15319	0.248831	0.619868	0.248831	0.619868	247.056	249.498	227.516	193.538
[truncated: 10,759 more rows]

## Sheet: TE_up
gene_ID	external_gene_name	wikigene_description	log2FC_TE_final	pvalue_final	pvalue.adjust	log2FC_TE_v1	pvalue_v1	KO2_log2TE	mock_log2TE	log2FC_TE_v2	pvalue_v2	noCHX_Ribo_12hpi_KO2_1	noCHX_Ribo_12hpi_KO2_2	noCHX_Ribo_12hpi_mock_1	noCHX_Ribo_12hpi_mock_2	noCHX_RNA_12hpi_KO2_1	noCHX_RNA_12hpi_KO2_2	noCHX_RNA_12hpi_mock_1	noCHX_RNA_12hpi_mock_2
ENSCSAG00000001814	RIIAD1		7.27205	0.000211325	0.0221547	7.27205	0.000211325	6.57183	-0.584957	7.20956	0.000126774	2.50501	3.86462	1.29206	3.15826	0	0	3.30068	3.33584
ENSCSAG00000008860	SLC11A1		6.96892	4.01248e-06	0.000934377	6.96892	4.01248e-06	7.08641	0.169928	6.92118	8.78998e-07	3.75751	5.79693	5.81427	3.15826	0	0	3.30068	5.33734
ENSCSAG00000018540			6.91128	3.03212e-05	0.004924	6.97101	1.69537e-05	6.34945	-0.584959	6.91128	3.03212e-05	3.75751	1.93231	5.16824	3.15826	0	0	7.42653	5.33734
ENSCSAG00000016744			6.55578	1.97681e-06	0.000497915	6.55578	1.97681e-06	7.93439	1.41504	6.52257	1.85127e-10	10.02	7.72924	7.10633	8.84314	0	0	2.47551	4.003
ENSCSAG00000001965	KCNN3	potassium calcium-activated channel subfamily N member 3	6.51959	4.86581e-05	0.0072354	6.51959	4.86581e-05	7.46491	1	6.47694	6.43849e-07	2.50501	9.66155	3.87618	5.68488	0	0	1.65034	2.66867
ENSCSAG00000011072	NKX2-2	NK2 homeobox 2	6.31662	2.24116e-05	0.00389582	6.31662	2.24116e-05	6.93441	0.652078	6.27507	3.2366e-06	2.50501	5.79693	5.81427	5.05322	0	0	4.12585	2.66867
ENSCSAG00000015294	INHBA	inhibin subunit beta A	4.41667	2.42274e-05	0.00415298	4.41667	2.42274e-05	5.3923	1	4.40651	4.71576e-09	25.0501	17.3908	13.5666	6.31653	1.44683	0	5.77619	4.003
ENSCSAG00000013771	MNT	MAX network transcriptional repressor	3.41539	1.07261e-06	0.000307864	3.41539	1.07261e-06	5.42626	2.01792	3.40824	3.86148e-15	48.8477	36.7139	41.3459	39.7941	1.44683	1.22656	13.2027	6.67167
ENSCSAG00000006592	C3orf52		3.1412	0.000349443	0.0319469	3.1412	0.000349443	3.52356	0.39593	3.12541	7.05919e-05	12.525	9.66155	11.6285	12.6331	1.44683	1.22656	9.90204	9.34034
ENSCSAG00000018985	C6orf120		1.76567	0.000147534	0.0171547	1.76567	0.000147534	1.58496	-0.176877	1.76421	4.30229e-05	38.8276	54.1047	31.6555	36.6359	20.2556	11.039	47.0347	30.6897
ENSCSAG00000006402	APOBEC3C		1.70026	0.000201728	0.0216498	1.70026	0.000201728	4.22055	2.52083	1.69954	3.79362e-11	145.291	115.939	145.357	119.382	4.34049	9.81249	23.1048	22.6837
ENSCSAG00000010369			1.60852	0.00050894	0.0427302	1.60852	0.00050894	2.19068	0.584963	1.607	3.79057e-05	52.6052	52.1724	39.4078	51.1639	10.1278	13.4922	33.0068	26.6867
ENSCSAG00000004346	DYRK2	dual specificity tyrosine phosphorylation regulated kinase 2	1.34348	4.33108e-06	0.000989507	1.3425	3.60747e-06	0.436099	-0.905363	1.34348	4.33108e-06	122.745	175.84	66.5411	59.3754	104.172	116.523	111.398	124.76
ENSCSAG00000005735	VKORC1	vitamin K epoxide reductase complex subunit 1	1.30162	0.000293058	0.0286771	1.30162	0.000293058	1.98351	0.683265	1.30051	1.43544e-05	95.1904	79.2247	87.2141	79.5883	27.4898	17.1719	56.9367	47.3689
ENSCSAG00000000057	DPM3		1.19073	7.93303e-05	0.0106423	1.19073	7.93303e-05	2.5943	1.40462	1.19016	9.58656e-09	211.673	253.133	190.579	177.494	49.1922	28.2109	85.8177	52.7062
ENSCSAG00000015225	SURF1		1.06283	0.00058436	0.0485514	1.06283	0.00058436	1.23522	0.17403	1.06169	0.000117693	106.463	119.803	86.5681	89.0631	47.7454	47.8359	92.419	64.0481
ENSCSAG00000009568	TAPBP	TAP binding protein	1.02058	0.000368913	0.0332345	1.02058	0.000368913	2.8101	1.79008	1.02009	1.92454e-07	284.319	241.539	271.979	225.5	47.7454	26.9843	76.7408	67.3839

## Sheet: TE_down
gene_ID	external_gene_name	wikigene_description	log2FC_TE_final	pvalue_final	pvalue.adjust	log2FC_TE_v1	pvalue_v1	KO2_log2TE	mock_log2TE	log2FC_TE_v2	pvalue_v2	noCHX_Ribo_12hpi_KO2_1	noCHX_Ribo_12hpi_KO2_2	noCHX_Ribo_12hpi_mock_1	noCHX_Ribo_12hpi_mock_2	noCHX_RNA_12hpi_KO2_1	noCHX_RNA_12hpi_KO2_2	noCHX_RNA_12hpi_mock_1	noCHX_RNA_12hpi_mock_2
ENSCSAG00000009591	DUSP1	dual specificity phosphatase 1	-2.98971	2.50144e-26	1.54364e-22	-2.995	1.07879e-31	-2.09657	0.894131	-2.98971	2.50144e-26	130.261	195.163	91.7363	105.486	706.053	684.421	53.6361	52.0391
ENSCSAG00000000149	JUN	Jun proto-oncogene, AP-1 transcription factor subunit	-2.39281	2.71065e-25	1.11516e-21	-2.39281	2.71065e-25	-0.51409	1.87657	-2.39067	9.28442e-33	261.774	336.222	236.447	222.973	444.177	409.671	70.1395	55.3749
ENSCSAG00000014681	ARRDC3	arrestin domain containing 3	-2.12482	6.57186e-07	0.000208125	-2.1321	2.27282e-08	-2.12676	2.94941e-07	-2.12482	6.57186e-07	47.5952	50.2401	36.1777	30.3193	195.322	233.047	28.0558	38.0285
ENSCSAG00000008600	CLK4	CDC like kinase 4	-2.10084	0.000156653	0.0174934	-2.1086	1.57879e-05	-1.74919	0.350498	-2.10084	0.000156653	27.5551	19.3231	29.7174	21.4762	79.5756	78.4999	18.1537	22.0165
ENSCSAG00000011516	GADD45B	growth arrest and DNA damage inducible beta	-2.06211	3.06635e-28	3.78449e-24	-2.06211	3.06635e-28	0.216999	2.27785	-2.06059	1.23395e-37	796.593	1072.43	533.621	561.539	866.651	740.843	111.398	114.753
ENSCSAG00000008527	ATF7IP2	activating transcription factor 7 interacting protein 2	-2.00411	0.000330571	0.0311443	-2.00212	3.75839e-05	-1.71989	0.276841	-2.00411	0.000330571	12.525	21.2554	34.2396	29.056	46.2986	66.2343	27.2306	24.6852
ENSCSAG00000011934	KLF10	Kruppel like factor 10	-1.90467	3.21306e-17	9.7764e-14	-1.90467	3.21306e-17	0.0113333	1.91488	-1.90347	1.40887e-26	328.156	311.102	263.58	278.559	295.153	338.531	66.8388	76.7242
ENSCSAG00000000927	ID3	inhibitor of DNA binding 3, HLH protein	-1.86746	3.86408e-09	1.90762e-06	-1.86746	3.86408e-09	0.209847	2.07468	-1.86579	4.21405e-14	100.2	129.465	164.092	173.073	88.2566	110.39	42.9088	37.3614
ENSCSAG00000008869	HES1	hes family bHLH transcription factor 1	-1.76481	3.96062e-17	9.7764e-14	-1.76481	3.96062e-17	-0.789065	0.974578	-1.76363	6.51004e-18	231.713	301.44	213.836	236.238	444.177	477.132	113.048	116.087
ENSCSAG00000007490	NEDD9	neural precursor cell expressed, developmentally down-regulated 9	-1.71672	7.08986e-07	0.000218758	-1.71672	7.08986e-07	-0.544548	1.16993	-1.71413	1.47541e-08	83.9178	96.6155	76.8776	75.7983	108.512	154.547	27.2306	41.3644
ENSCSAG00000001494	PTBP2	polypyrimidine tract binding protein 2	-1.68435	8.69461e-09	4.12727e-06	-1.68573	4.96157e-09	-1.29189	0.392318	-1.68435	8.69461e-09	77.6553	86.9539	94.3204	95.3796	172.173	231.82	65.1884	78.7257
ENSCSAG00000006272	NFKBIZ	NFKB inhibitor zeta	-1.67641	1.74689e-05	0.00326669	-1.67641	1.74689e-05	-0.619178	1.05344	-1.6716	2.45999e-06	61.3727	63.7662	59.4348	50.5322	79.5756	111.617	22.2796	30.6897
ENSCSAG00000012077	CCNL1	cyclin L1	-1.54767	1.11533e-06	0.00031285	-1.54767	1.11533e-06	-0.545161	1	-1.54448	1.96103e-07	101.453	94.6832	72.3554	94.1163	130.215	155.773	42.9088	40.03
ENSCSAG00000010924	CLK1		-1.47627	7.68383e-05	0.0104402	-1.4766	1.3038e-05	-1.69052	-0.214594	-1.47627	7.68383e-05	48.8477	52.1724	53.6205	51.7955	143.236	182.758	50.3354	72.7212
ENSCSAG00000014076	ELF3	E74 like ETS transcription factor 3	-1.47272	1.49844e-15	3.0823e-12	-1.47272	1.49844e-15	-0.564571	0.907652	-1.47211	2.10341e-19	390.782	369.071	350.148	361.305	610.562	512.702	200.516	178.134
ENSCSAG00000005364	GDF15	growth differentiation factor 15	-1.424	4.00998e-11	2.74951e-08	-1.424	4.00998e-11	-0.0392414	1.38386	-1.42316	2.19386e-14	296.844	247.336	310.095	284.875	296.6	262.484	122.95	105.412
ENSCSAG00000017469	COL4A2		-1.41719	1.52309e-09	7.83248e-07	-1.41719	1.52309e-09	0.386917	1.80404	-1.41697	2.0544e-35	2883.27	3383.47	3706.28	3462.72	2608.63	2183.28	1198.97	853.974
ENSCSAG00000010905	BHLHE40	basic helix-loop-helix family member e40	-1.3952	1.32191e-14	1.6315e-11	-1.3952	1.32191e-14	0.51998	1.91484	-1.39451	1.28442e-24	914.329	1072.43	694.483	671.447	590.307	794.811	174.936	187.474
ENSCSAG00000012060	TIPARP	TCDD inducible poly(ADP-ribose) polymerase	-1.31949	1.28866e-08	5.89059e-06	-1.31949	1.28866e-08	-0.208947	1.1098	-1.31856	3.21543e-11	240.481	222.216	201.561	221.079	241.621	291.921	84.9925	110.75
ENSCSAG00000011386	FXR2	FMR1 autosomal homolog 2	-1.31389	4.62937e-07	0.000154421	-1.31359	2.2897e-07	-0.980371	0.332576	-1.31389	4.62937e-07	96.4429	88.8863	138.897	132.647	188.088	176.625	117.999	98.0736
ENSCSAG00000012217	FLNB	filamin B	-1.27354	3.52179e-14	3.95145e-11	-1.27354	3.52179e-14	-1.14679	0.126591	-1.27305	4.55788e-15	432.114	427.041	306.864	312.037	1002.65	899.069	273.131	293.554
ENSCSAG00000005940	TBX2		-1.24661	0.00015733	0.0174934	-1.24682	4.71348e-05	-1.04182	0.203795	-1.24661	0.00015733	51.3527	67.6308	88.5061	78.325	124.427	121.43	67.6639	77.3914
ENSCSAG00000005877	RRP12	ribosomal RNA processing 12 homolog	-1.22353	5.1843e-05	0.00752761	-1.22353	5.1843e-05	0.191142	1.41344	-1.2226	4.94077e-07	151.553	121.736	159.569	141.49	143.236	96.8983	66.0136	47.3689
ENSCSAG00000006885	LDLR		-1.21158	3.66135e-12	2.82427e-09	-1.21158	3.66135e-12	0.0521305	1.26332	-1.21099	1.68075e-16	592.435	676.308	486.461	514.797	623.584	598.562	231.873	184.805
ENSCSAG00000010109	MYC	MYC proto-oncogene, bHLH transcription factor	-1.20285	1.57396e-07	6.07057e-05	-1.20285	1.57396e-07	0.162057	1.36371	-1.20199	2.03513e-09	219.188	260.862	302.342	240.66	212.684	215.875	117.999	92.7363
ENSCSAG00000018063	AKAP17A		-1.19742	0.000318525	0.0304747	-1.19742	0.000318525	-0.547487	0.648015	-1.19564	0.000193976	65.1303	90.8186	76.2316	75.7983	120.087	107.937	57.7619	38.6957
ENSCSAG00000003984	TBCK	TBC1 domain containing kinase	-1.17826	2.56104e-05	0.00432991	-1.17826	2.56104e-05	-0.285586	0.891624	-1.17787	4.13778e-06	107.715	92.7509	144.065	138.332	137.449	107.937	69.3143	83.3959
ENSCSAG00000009140	WDR91	WD repeat domain 91	-1.16772	0.000359303	0.0326067	-1.16772	0.000359303	0.378512	1.54432	-1.16671	1.08802e-05	92.6854	102.412	127.914	117.487	72.3415	78.4999	38.783	44.7002
ENSCSAG00000006719	ZNF627		-1.15221	3.15892e-05	0.0050633	-1.15221	3.15892e-05	-0.230005	0.92139	-1.15123	4.38491e-06	118.988	123.668	129.206	120.646	149.023	136.148	60.2374	72.0541
ENSCSAG00000013764	PLEKHG3		-1.1515	3.33989e-05	0.00528473	-1.15209	2.79276e-05	-0.962719	0.188762	-1.1515	3.33989e-05	101.453	94.6832	116.931	95.3796	214.131	168.039	105.622	80.0601
ENSCSAG00000019089		histone H3.1	-1.13881	5.60513e-12	4.06932e-09	-1.13881	5.60513e-12	0.215068	1.3535	-1.13832	7.66827e-17	723.948	684.038	585.949	615.23	613.456	599.788	216.195	253.524
ENSCSAG00000017470	COL4A1	collagen type IV alpha 1 chain	-1.12344	1.20004e-14	1.6315e-11	-1.12344	1.20004e-14	0.881108	2.00443	-1.12339	3.47502e-26	6088.43	7089.65	7351.18	7329.7	3959.97	3195.19	2093.46	1565.84
ENSCSAG00000007501	ITGB2		-1.11828	0.000134665	0.0164558	-1.11828	0.000134665	0.663764	1.78058	-1.11704	6.92262e-07	150.301	150.72	185.411	161.703	98.3844	91.9921	47.0347	54.0406
ENSCSAG00000018671	FLRT3	fibronectin leucine rich transmembrane protein 3	-1.09268	5.46509e-10	3.07397e-07	-1.09268	5.46509e-10	0.378934	1.47139	-1.09233	7.18688e-17	680.11	687.902	757.147	757.352	448.517	603.468	250.027	295.555
ENSCSAG00000015684	COL7A1	collagen type VII alpha 1 chain	-1.08206	3.30677e-06	0.000784848	-1.08206	3.30677e-06	-0.295033	0.786785	-1.08193	2.82516e-07	180.361	199.028	200.269	183.179	227.152	237.953	127.076	94.7378
ENSCSAG00000009985	FLNC	filamin C	-1.07813	2.65405e-12	2.18375e-09	-1.07813	2.65405e-12	0.0375969	1.11548	-1.07777	7.23559e-16	774.048	780.653	684.792	628.495	736.436	778.866	302.837	302.894
ENSCSAG00000001429	CCN1	cellular communication network factor 1	-1.0776	9.65645e-15	1.48975e-11	-1.0776	9.65645e-15	1.39649	2.47395	-1.07741	6.69177e-26	4762.02	5184.39	4010.56	3777.92	1666.75	2110.91	733.576	667.834
ENSCSAG00000015604	COL5A1	collagen type V alpha 1 chain	-1.06437	4.06344e-13	3.58222e-10	-1.06437	4.06344e-13	0.772028	1.83647	-1.06438	2.03208e-20	2973.45	3551.59	3296.05	3160.79	2061.73	1758.89	1027.34	781.253
ENSCSAG00000009681	CAD	carbamoyl-phosphate synthetase 2, aspartate transcarbamylase, and dihydroorotase	-1.03484	3.65879e-07	0.000125435	-1.03539	2.96109e-07	-0.0591523	0.975408	-1.03484	3.65879e-07	398.297	270.523	386.326	312.037	360.261	337.304	176.586	178.134
ENSCSAG00000016125	WFS1	wolframin ER transmembrane glycoprotein	-1.02412	1.81951e-06	0.000477103	-1.02412	1.81951e-06	1.26597	2.28934	-1.02342	2.10654e-11	434.619	450.228	456.097	506.586	183.747	183.984	98.1952	99.4079
ENSCSAG00000008773	DBN1	drebrin 1	-1.0206	5.47945e-10	3.07397e-07	-1.0206	5.47945e-10	1.18563	2.20605	-1.02034	3.56526e-18	1237.47	1165.18	1570.5	1443.33	545.455	511.476	376.278	276.874
ENSCSAG00000008854	PLEC		-1.01798	1.66216e-13	1.57803e-10	-1.01798	1.66216e-13	-0.888245	0.129768	-1.01785	1.25578e-16	1370.24	1501.4	1284.95	1133.19	2748.98	2564.74	1221.25	989.409
ENSCSAG00000012765	ID1	DNA-binding protein inhibitor ID-1	-1.01601	7.51817e-08	3.3139e-05	-1.01601	7.51817e-08	0.595769	1.61143	-1.01606	3.63241e-12	405.812	398.056	612.437	653.129	289.366	242.859	229.397	184.805
ENSCSAG00000009057	ELAC2	elaC ribonuclease Z 2	-1.0142	0.000166699	0.0183696	-1.0142	0.000166699	0.170469	1.1836	-1.01284	1.91979e-05	176.603	154.585	181.535	136.437	163.492	132.469	73.4401	67.3839

## Sheet: TE_full
gene_ID	external_gene_name	wikigene_description	log2FC_TE_final	pvalue_final	pvalue.adjust	log2FC_TE_v1	pvalue_v1	KO2_log2TE	mock_log2TE	log2FC_TE_v2	pvalue_v2	noCHX_Ribo_12hpi_KO2_1	noCHX_Ribo_12hpi_KO2_2	noCHX_Ribo_12hpi_mock_1	noCHX_Ribo_12hpi_mock_2	noCHX_RNA_12hpi_KO2_1	noCHX_RNA_12hpi_KO2_2	noCHX_RNA_12hpi_mock_1	noCHX_RNA_12hpi_mock_2
ENSCSAG00000002788			7.67187	0.0180761	0.353963	7.67187	0.0180761	5.76448	-2.80733	8.06424	0.0154196	0	3.86462	0.64603	0	0	0	4.12585	3.33584
ENSCSAG00000001814	RIIAD1		7.27205	0.000211325	0.0221547	7.27205	0.000211325	6.57183	-0.584957	7.20956	0.000126774	2.50501	3.86462	1.29206	3.15826	0	0	3.30068	3.33584
ENSCSAG00000018665	DEFB125		7.21926	0.00111782	0.0693272	7.21926	0.00111782	6.08641	-0.999993	7.15588	0.00110996	2.50501	1.93231	1.29206	1.89496	0	0	4.12585	2.0015
ENSCSAG00000006222	GBX2	gastrulation brain homeobox 2	7.11353	0.000711014	0.0535082	7.17608	0.000570107	6.08642	-0.999994	7.11353	0.000711014	1.2525	3.86462	1.93809	1.89496	0	0	5.77619	2.0015
ENSCSAG00000008860	SLC11A1		6.96892	4.01248e-06	0.000934377	6.96892	4.01248e-06	7.08641	0.169928	6.92118	8.78998e-07	3.75751	5.79693	5.81427	3.15826	0	0	3.30068	5.33734
ENSCSAG00000003524	MAML3	mastermind like transcriptional coactivator 3	6.92834	0.00681485	0.214001	7.01778	0.00395471	5.34946	-1.58495	6.92834	0.00681485	1.2525	1.93231	0.64603	1.89496	0	0	4.12585	5.33734
ENSCSAG00000018540			6.91128	3.03212e-05	0.004924	6.97101	1.69537e-05	6.34945	-0.584959	6.91128	3.03212e-05	3.75751	1.93231	5.16824	3.15826	0	0	7.42653	5.33734
ENSCSAG00000001758	CD160		6.71613	0.00101547	0.0663116	6.71613	0.00101547	6.57182	3.04862e-06	6.62051	0.00026573	2.50501	3.86462	1.93809	1.89496	0	0	3.30068	1.33433
ENSCSAG00000016744			6.55578	1.97681e-06	0.000497915	6.55578	1.97681e-06	7.93439	1.41504	6.52257	1.85127e-10	10.02	7.72924	7.10633	8.84314	0	0	2.47551	4.003
ENSCSAG00000001965	KCNN3	potassium calcium-activated channel subfamily N member 3	6.51959	4.86581e-05	0.0072354	6.51959	4.86581e-05	7.46491	1	6.47694	6.43849e-07	2.50501	9.66155	3.87618	5.68488	0	0	1.65034	2.66867
ENSCSAG00000011072	NKX2-2	NK2 homeobox 2	6.31662	2.24116e-05	0.00389582	6.31662	2.24116e-05	6.93441	0.652078	6.27507	3.2366e-06	2.50501	5.79693	5.81427	5.05322	0	0	4.12585	2.66867
ENSCSAG00000013352	IQCH	IQ motif containing H	5.92661	0.063187	0.591397	5.92661	0.063187	4.76448	-0.99999	6.42671	0.0490336	0	1.93231	1.29206	1.26331	0	0	0.82517	3.33584
ENSCSAG00000007599	RBM24	RNA binding motif protein 24	5.75679	0.0203062	0.373801	5.89485	0.0180065	5.34944	-0.415032	5.75679	0.0203062	1.2525	1.93231	1.93809	1.26331	0	0	0.82517	3.33584
ENSCSAG00000007252	ALDOC	aldolase, fructose-bisphosphate C	5.13925	0.0418272	0.500762	5.13925	0.0418272	4.76449	-0.321923	5.62893	0.0322993	0	1.93231	3.23015	1.26331	0	0	0.82517	4.003
ENSCSAG00000004898		zinc finger protein 91-like	5.01698	0.00121201	0.0717518	5.00413	0.000991859	2.58496	-2.32192	5.01698	0.00121201	3.75751	7.72924	1.93809	1.26331	1.44683	1.22656	9.07687	6.00451
ENSCSAG00000010378	SRPX2	sushi repeat containing protein X-linked 2	4.7297	0.0007935	0.0572712	4.7297	0.0007935	6.08642	1.36257	4.65806	0.000530761	1.2525	3.86462	10.3365	8.21149	0	0	2.47551	4.67017
ENSCSAG00000015294	INHBA	inhibin subunit beta A	4.41667	2.42274e-05	0.00415298	4.41667	2.42274e-05	5.3923	1	4.40651	4.71576e-09	25.0501	17.3908	13.5666	6.31653	1.44683	0	5.77619	4.003
ENSCSAG00000011503			4.38323	0.0369667	0.477393	4.38323	0.0369667	3.16991	-1.99999	4.33188	0.0221353	5.01002	3.86462	0	1.26331	0	1.22656	2.47551	2.0015
ENSCSAG00000007908	BTN3A2	butyrophilin subfamily 3 member A3	4.29689	0.00762615	0.228451	4.29971	0.00716976	2.32192	-1.87446	4.29689	0.00762615	6.26252	3.86462	1.93809	1.26331	1.44683	1.22656	5.77619	5.33734
ENSCSAG00000001857	S100A14	S100 calcium binding protein A14	4.05847	0.028135	0.429752	4.05847	0.028135	3.16991	-0.736961	4.00136	0.016474	2.50501	5.79693	1.29206	1.89496	0	1.22656	2.47551	2.66867
ENSCSAG00000004918	STAC3	SH3 and cysteine rich domain 3	4.03423	0.113446	0.710801	4.03423	0.113446	2.58494	-2.32191	4.30892	0.0903678	0	5.79693	0	1.26331	0	1.22656	1.65034	2.66867
ENSCSAG00000001100	SH3D21		3.98213	0.0836158	0.651095	3.98213	0.0836158	2.80734	-1.99999	3.97252	0.0684971	1.2525	5.79693	0	0.631653	0	1.22656	3.30068	1.33433
ENSCSAG00000001869	NPR1	natriuretic peptide receptor 1	3.84606	0.112939	0.710083	3.84606	0.112939	2.58494	-0.584957	3.56803	0.112833	0	5.79693	1.29206	1.26331	1.44683	0	3.30068	0
ENSCSAG00000014772	MEF2C		3.7909	0.112102	0.705897	3.7909	0.112102	3.7645	3.17029e-06	4.60578	0.08256	1.2525	0	1.29206	3.78992	0	0	2.47551	2.66867
ENSCSAG00000011706	AMH	anti-Mullerian hormone	3.77149	0.122088	0.718076	3.77149	0.122088	2.32191	-2.32191	3.78928	0.122038	1.2525	3.86462	0.64603	0	0	1.22656	2.47551	3.33584
ENSCSAG00000004091	CATSPERG		3.5798	0.0139923	0.314559	3.5798	0.0139923	3.16991	-0.362567	3.5497	0.0112572	5.01002	3.86462	1.93809	5.05322	0	1.22656	4.95102	4.003
ENSCSAG00000017664	CTAGE1		3.48957	0.1246	0.722419	3.48957	0.1246	2.32191	-0.999993	3.45686	0.114941	1.2525	3.86462	0.64603	0.631653	1.44683	0	1.65034	2.0015
ENSCSAG00000012029	TMEFF2	transmembrane protein with EGF like and two follistatin like domains 2	3.4256	0.056055	0.570347	3.4256	0.056055	2.99998	-0.321925	3.38356	0.0374386	3.75751	3.86462	3.23015	0.631653	1.44683	0	1.65034	3.33584
ENSCSAG00000013771	MNT	MAX network transcriptional repressor	3.41539	1.07261e-06	0.000307864	3.41539	1.07261e-06	5.42626	2.01792	3.40824	3.86148e-15	48.8477	36.7139	41.3459	39.7941	1.44683	1.22656	13.2027	6.67167
ENSCSAG00000018591			3.39496	0.00690122	0.214007	3.39496	0.00690122	3.16992	-0.169922	3.37261	0.00195962	7.51503	9.66155	5.16824	3.15826	1.44683	1.22656	5.77619	3.33584
ENSCSAG00000017045	CAPSL	calcyphosine like	3.39318	0.0145273	0.3196	3.39318	0.0145273	4.08744	0.736967	3.37303	0.00167655	8.76753	7.72924	3.23015	6.94818	1.44683	0	2.47551	4.003
ENSCSAG00000005287	IRX5		3.36485	0.0143946	0.318384	3.36485	0.0143946	4.70042	1.37851	3.34209	0.000143601	13.7776	11.5939	7.10633	5.68488	1.44683	0	1.65034	3.33584
ENSCSAG00000017191	PDZD2	PDZ domain containing 2	3.35301	0.0451705	0.516198	3.35301	0.0451705	2.99998	-0.263031	3.29566	0.0309924	3.75751	3.86462	3.23015	1.89496	0	1.22656	0.82517	4.67017
ENSCSAG00000014530			3.34457	0.16297	0.783645	3.34457	0.16297	2.58494	-1.58495	3.32919	0.131778	3.75751	1.93231	0.64603	0	1.44683	0	1.65034	1.33433
ENSCSAG00000010263	CD4	CD4 molecule	3.34189	0.16976	0.790767	3.34189	0.16976	2.58494	-0.584958	3.56027	0.11283	0	5.79693	0.64603	1.26331	0	1.22656	1.65034	1.33433
ENSCSAG00000019734	ISLR	immunoglobulin superfamily containing leucine rich repeat	3.31342	0.12494	0.722914	3.31342	0.12494	2.80734	-0.999993	3.31273	0.103015	1.2525	5.79693	1.93809	0	0	1.22656	1.65034	2.0015
ENSCSAG00000017066	ERICH1	glutamate rich 1	3.31042	0.0116802	0.291226	3.31042	0.0116802	4.16991	0.893086	3.28854	0.00160036	13.7776	3.86462	4.52221	7.57983	1.44683	0	4.12585	2.66867
ENSCSAG00000006614	CYP2E1		3.26746	0.0221987	0.389724	3.26746	0.0221987	3.80734	0.584964	3.23943	0.00492213	6.26252	7.72924	6.4603	2.52661	1.44683	0	4.12585	2.0015
ENSCSAG00000006592	C3orf52		3.1412	0.000349443	0.0319469	3.1412	0.000349443	3.52356	0.39593	3.12541	7.05919e-05	12.525	9.66155	11.6285	12.6331	1.44683	1.22656	9.90204	9.34034
ENSCSAG00000003840	EFCAB3	uncharacterized LOC103243284	3.06678	0.219597	0.841459	3.06678	0.219597	2.32191	-1.58495	3.04801	0.195214	2.50501	1.93231	1.29206	0	1.44683	0	1.65034	1.33433
ENSCSAG00000008092	UROC1		3.05041	0.153102	0.76912	3.59328	0.118897	2.32191	-0.584957	3.05041	0.153102	2.50501	1.93231	0.64603	1.26331	0	1.22656	3.30068	0
ENSCSAG00000006620	ROM1	retinal outer segment membrane protein 1	3.0402	0.15311	0.76912	2.96691	0.117252	-0.485425	-3.39231	3.0402	0.15311	2.50501	1.93231	0.64603	0.631653	1.44683	6.1328	12.3776	9.34034
ENSCSAG00000007945	SLC12A8		3.03815	0.161817	0.783645	3.03059	0.154298	1.32192	-1.58495	3.03815	0.161817	1.2525	3.86462	1.29206	1.26331	1.44683	1.22656	3.30068	2.66867
ENSCSAG00000013049	MADCAM1		3.01249	0.254464	0.865542	3.01249	0.254464	1.58495	-1.32192	3.45348	0.204619	2.50501	0	1.29206	0.631653	1.44683	0	4.12585	0.667167
ENSCSAG00000016178	ZNF107		2.97848	0.156357	0.774799	2.97848	0.156357	0.584962	-2.32192	3.29775	0.139495	6.26252	0	1.29206	1.26331	2.89366	1.22656	4.95102	5.33734
ENSCSAG00000010909			2.97148	0.0192052	0.364723	2.97148	0.0192052	3.24792	0.32193	2.95038	0.00449493	12.525	5.79693	3.87618	6.31653	0	2.45312	3.30068	4.67017
ENSCSAG00000002763			2.94663	0.157931	0.777602	2.94663	0.157931	2.80734	1.69858e-06	2.89606	0.105152	5.01002	1.93231	1.93809	1.26331	0	1.22656	1.65034	1.33433
ENSCSAG00000018357	ACSS1	acyl-CoA synthetase short chain family member 1	2.93106	0.214131	0.839551	2.93106	0.214131	1.80735	-5.76454	2.98211	0.191248	5.01002	1.93231	0	0	0	2.45312	1.65034	2.0015
ENSCSAG00000004441	LMO1		2.91999	0.000884004	0.0609518	2.91999	0.000884004	3.04439	0.144392	2.90812	8.46143e-05	17.5351	15.4585	12.2746	9.47479	4.34049	0	12.3776	7.33884
ENSCSAG00000014356	PCYT1B	phosphate cytidylyltransferase 1, choline, beta	2.91827	0.0631314	0.591397	2.91827	0.0631314	2.45942	-0.415034	2.91497	0.0525623	1.2525	9.66155	0.64603	5.05322	0	2.45312	3.30068	4.67017
ENSCSAG00000006448	DPPA2	developmental pluripotency associated 2	2.8648	0.166169	0.788638	2.8648	0.166169	1.73696	-0.999994	3.05697	0.113541	0	9.66155	0.64603	1.26331	1.44683	2.45312	3.30068	0.667167
ENSCSAG00000001333			2.82413	0.0208768	0.378323	2.82413	0.0208768	4.24791	1.44057	2.8059	0.00132549	8.76753	9.66155	9.04442	10.1064	0	1.22656	1.65034	5.33734
ENSCSAG00000019717	ADRB2	adrenoceptor beta 2	2.80883	0.117132	0.715426	2.85379	0.106482	2.32191	-0.485423	2.80883	0.117132	2.50501	1.93231	3.87618	0.631653	1.44683	0	1.65034	5.33734
ENSCSAG00000007528	IVD		2.80095	0.154851	0.771352	2.81011	0.135393	1.32192	-1.41503	2.80095	0.154851	2.50501	1.93231	0.64603	1.89496	1.44683	1.22656	2.47551	6.00451
ENSCSAG00000001775	ITGA10		2.79873	0.0669798	0.598728	2.79873	0.0669798	1.67807	-0.999996	2.78381	0.0387312	6.26252	9.66155	1.29206	1.89496	4.34049	1.22656	3.30068	2.66867
ENSCSAG00000017818	CHST9	carbohydrate sulfotransferase 9	2.78493	0.189582	0.81131	2.80079	0.189542	1.32192	-1.32192	2.78493	0.189582	2.50501	1.93231	1.29206	0.631653	0	2.45312	1.65034	2.66867
ENSCSAG00000002240	FLI1	Fli-1 proto-oncogene, ETS transcription factor	2.7821	0.0420833	0.503287	2.7821	0.0420833	2.5025	-0.22239	2.77391	0.0187419	5.01002	11.5939	3.23015	3.15826	1.44683	2.45312	4.12585	3.33584
ENSCSAG00000000733	CHD5	chromodomain helicase DNA binding protein 5	2.75308	0.236172	0.852617	2.75308	0.236172	1.32192	-1.32192	3.0671	0.189306	5.01002	0	1.29206	1.26331	0	2.45312	2.47551	2.66867
ENSCSAG00000012651	HACD1		2.73499	0.0262786	0.417591	2.73499	0.0262786	2	-0.700437	2.72261	0.0251046	6.26252	5.79693	2.58412	5.05322	1.44683	2.45312	7.42653	6.00451
ENSCSAG00000007181	CATSPERZ	catsper channel auxiliary subunit zeta	2.73434	0.00621343	0.20435	2.73434	0.00621343	2.20163	-0.502498	2.72211	0.00337934	11.2725	11.5939	7.75236	4.42157	1.44683	3.67968	6.60136	10.0075
ENSCSAG00000012914	RNF24	ring finger protein 24	2.73415	0.00907216	0.250205	2.73415	0.00907216	4.80734	2.078	2.72445	7.16854e-05	11.2725	17.3908	23.2571	14.528	1.44683	0	3.30068	6.00451
ENSCSAG00000005973	SLC43A1		2.73274	0.0199249	0.371563	2.73274	0.0199249	4.24791	1.52356	2.72023	0.00181738	5.01002	13.5262	11.6285	11.3698	1.44683	0	1.65034	6.00451
ENSCSAG00000014474	MARCHF3	membrane associated ring-CH-type finger 3	2.73105	0.0335435	0.459049	2.73105	0.0335435	1.80735	-0.847994	2.72142	0.0178832	15.0301	5.79693	3.23015	1.89496	1.44683	4.90624	4.12585	4.67017
ENSCSAG00000005985	UBE2L6	ubiquitin conjugating enzyme E2 L6	2.72827	0.015164	0.323173	2.72827	0.015164	4.80734	2.08746	2.71757	0.000140537	17.5351	9.66155	20.673	13.2647	0	1.22656	7.42653	0.667167
ENSCSAG00000005961	MCHR1	melanin concentrating hormone receptor 1	2.71954	0.0443956	0.511606	2.71954	0.0443956	3.80734	1.11548	2.69523	0.00951635	7.51503	5.79693	5.81427	6.94818	1.44683	0	3.30068	2.66867
ENSCSAG00000002588	PTH2	parathyroid hormone 2	2.71012	0.0108339	0.280761	2.71012	0.0108339	3.95419	1.26304	2.69702	0.000548204	22.5451	7.72924	14.2127	10.1064	0	2.45312	3.30068	7.33884
ENSCSAG00000018096	C1orf54	chromosome unknown C1orf54 homolog	2.69205	0.116095	0.714279	2.69205	0.116095	3.45941	0.807355	2.67997	0.0556069	1.2525	9.66155	3.23015	3.78992	0	1.22656	3.30068	1.33433
ENSCSAG00000009836	CD163L1		2.68665	0.31398	0.901498	2.68665	0.31398	1.58495	-0.999992	3.14107	0.246497	2.50501	0	1.29206	0.631653	0	1.22656	1.65034	2.0015
ENSCSAG00000017158	ADAMTS12	ADAM metallopeptidase with thrombospondin type 1 motif 12	2.68665	0.313062	0.900728	2.68665	0.313062	1.58495	-0.999992	3.14107	0.246497	2.50501	0	1.29206	0.631653	0	1.22656	3.30068	1.33433
ENSCSAG00000003006	NPAS1	neuronal PAS domain protein 1	2.66991	0.0561778	0.570655	2.66991	0.0561778	2.80735	0.192647	2.64061	0.0262815	3.75751	9.66155	4.52221	3.15826	0	2.45312	4.95102	2.0015
ENSCSAG00000012625	ADGRF1		2.66922	0.0480132	0.530035	2.66922	0.0480132	3.45942	0.807356	2.64287	0.0274032	1.2525	9.66155	8.39839	6.31653	0	1.22656	1.65034	6.00451
ENSCSAG00000008906		PRELI domain containing 1	2.66853	0.0963099	0.680789	2.66853	0.0963099	1.58496	-0.999995	2.6477	0.0892332	2.50501	5.79693	1.29206	2.52661	2.89366	0	3.30068	5.33734
ENSCSAG00000019435			2.65171	0.072138	0.612363	2.64268	0.0651242	0.999999	-1.58496	2.65171	0.072138	3.75751	5.79693	1.93809	1.89496	2.89366	2.45312	5.77619	6.00451
ENSCSAG00000002780	RAPGEFL1		2.62102	0.177183	0.795355	2.62102	0.177183	2.58495	-0.321924	2.60432	0.165735	3.75751	1.93231	0	3.78992	0	1.22656	2.47551	3.33584
ENSCSAG00000011119	TBXA2R	thromboxane A2 receptor	2.62075	0.0693555	0.604789	2.62075	0.0693555	3.32191	0.736966	2.58477	0.0336482	3.75751	5.79693	5.81427	4.42157	0	1.22656	3.30068	2.66867
ENSCSAG00000000497	PROB1	proline rich basic protein 1	2.58627	0.202585	0.825785	2.45974	0.170911	-1.2801	-4.70042	2.58627	0.202585	2.50501	3.86462	0	1.26331	7.23415	9.81249	16.5034	9.34034
ENSCSAG00000011804	ARHGEF37	Rho guanine nucleotide exchange factor 37	2.56121	0.137918	0.749859	2.56121	0.137918	2.45942	2.07215e-06	2.53522	0.0755359	5.01002	5.79693	1.93809	1.89496	0	2.45312	2.47551	2.0015
ENSCSAG00000012500	PCDHGA1	protocadherin gamma-A1	2.54026	0.117483	0.716037	2.54026	0.117483	6.08744	3.50249	2.59871	0.0105584	41.3327	94.6832	25.8412	7.57983	0	2.45312	1.65034	0.667167
ENSCSAG00000000337			2.52507	0.0907646	0.669012	2.52639	0.086364	0.999999	-1.45943	2.52507	0.0907646	3.75751	5.79693	0.64603	3.15826	4.34049	1.22656	4.12585	7.33884
ENSCSAG00000008045	BTNL8	butyrophilin like 8	2.52312	0.127448	0.725203	2.52312	0.127448	0.874469	-2.16992	2.57349	0.125959	8.76753	1.93231	1.93809	0	1.44683	4.90624	4.95102	4.003
ENSCSAG00000008143	ABCG1	ATP binding cassette subfamily G member 1	2.48197	0.0949258	0.679005	2.48197	0.0949258	3.58494	1.1375	2.45237	0.035195	7.51503	3.86462	8.39839	2.52661	1.44683	0	2.47551	2.66867
ENSCSAG00000004280	CLIP3	CAP-Gly domain containing linker protein 3	2.46177	0.315167	0.902295	2.46177	0.315167	0.999995	-0.999993	2.46585	0.314159	0	3.86462	0.64603	1.26331	1.44683	1.22656	4.12585	0
ENSCSAG00000017193	AFF3		2.45823	0.125754	0.722914	2.45823	0.125754	3.58494	1.16992	2.42781	0.04504	6.26252	5.79693	1.93809	6.94818	0	1.22656	0.82517	2.66867
ENSCSAG00000013756	KIAA1755	KIAA1755 ortholog	2.43841	0.191855	0.811913	2.40418	0.190449	0.485427	-1.80735	2.43841	0.191855	2.50501	3.86462	1.29206	1.26331	4.34049	1.22656	4.12585	2.66867
ENSCSAG00000004820	ENO4		2.43801	0.140747	0.752536	2.43801	0.140747	3.70042	1.73696	1.97667	0.0947223	8.76753	3.86462	1.93809	8.21149	1.44683	0	0	3.33584
ENSCSAG00000008147	CNIH2	cornichon family AMPA receptor auxiliary protein 2	2.38885	0.0454094	0.516762	2.38885	0.0454094	3.64385	1.28011	2.37299	0.00404219	12.525	11.5939	9.04442	8.21149	0	2.45312	4.12585	2.66867
ENSCSAG00000019144	TMEM140	transmembrane protein 140	2.38868	0.231547	0.846993	2.38868	0.231547	2.32191	2.28744e-06	2.34992	0.215601	1.2525	3.86462	0.64603	2.52661	1.44683	0	2.47551	2.0015
ENSCSAG00000005164			2.38606	0.222208	0.842998	2.92236	0.170602	2.32191	1.94968e-06	2.38606	0.222208	2.50501	1.93231	1.29206	1.89496	1.44683	0	0	2.66867
ENSCSAG00000004990	MYO1A	myosin IA	2.38158	0.123976	0.721761	2.38158	0.123976	3.64384	1.73696	1.93953	0.057049	3.75751	21.2554	3.87618	6.31653	1.44683	1.22656	0	2.66867
ENSCSAG00000017710	PHF11	PHD finger protein 11	2.36568	0.150006	0.768207	2.36568	0.150006	2.80734	0.485428	2.32412	0.114381	5.01002	1.93231	3.87618	2.52661	0	1.22656	2.47551	2.66867
ENSCSAG00000001766	NUDT17		2.35744	0.0349853	0.465791	2.35744	0.0349853	1.848	-0.485425	2.35344	0.0286329	13.7776	3.86462	6.4603	4.42157	2.89366	2.45312	7.42653	7.33884
ENSCSAG00000003561			2.35221	0.145313	0.762521	2.35221	0.145313	1.80735	-0.485423	2.31678	0.139044	2.50501	3.86462	1.93809	2.52661	0	2.45312	4.12585	3.33584
ENSCSAG00000004347			2.35004	0.225822	0.846178	2.35004	0.225822	2.32191	2.52654e-06	2.60353	0.169686	5.01002	0	1.93809	2.52661	0	1.22656	3.30068	2.0015
ENSCSAG00000014738	SCML2		2.33355	0.00516766	0.185706	2.33355	0.00516766	2	-0.321927	2.33043	0.00366701	17.5351	9.66155	12.9206	6.94818	2.89366	3.67968	14.0279	10.6747
ENSCSAG00000017964	MTUS2	microtubule associated scaffold protein 2	2.32285	0.064515	0.591927	2.32285	0.064515	2.58496	0.289508	2.3007	0.0424297	3.75751	7.72924	5.16824	6.31653	1.44683	1.22656	5.77619	3.33584
ENSCSAG00000000835	AGMAT	agmatinase	2.32048	0.0722216	0.612363	2.32048	0.0722216	2.11547	-0.169923	2.30833	0.0516641	5.01002	7.72924	2.58412	5.05322	1.44683	2.45312	5.77619	2.66867
ENSCSAG00000006822	TRPM1		2.31489	0.314957	0.902295	2.39332	0.27687	1.58495	-0.73696	2.31489	0.314957	1.2525	1.93231	1.93809	0.631653	0	1.22656	2.47551	3.33584
ENSCSAG00000014493	C2orf74	chromosome unknown C2orf74 homolog	2.30051	0.126076	0.722914	2.3217	0.112257	0.999999	-1.26303	2.30051	0.126076	3.75751	3.86462	1.93809	3.15826	4.34049	0	6.60136	5.33734
ENSCSAG00000010387	C1QTNF2	C1q and TNF related 2	2.26956	0.088404	0.666107	2.24448	0.0770877	0.530515	-1.67807	2.26956	0.088404	5.01002	7.72924	3.87618	0.631653	2.89366	6.1328	6.60136	8.67318
ENSCSAG00000010803	FRMPD1	FERM and PDZ domain containing 1	2.25441	0.129283	0.727602	2.25441	0.129283	1.37851	-0.807351	2.26186	0.102426	8.76753	3.86462	3.23015	1.26331	4.34049	1.22656	4.12585	2.66867
ENSCSAG00000000138	CITED4	Cbp/p300 interacting transactivator with Glu/Asp rich carboxy-terminal domain 4	2.25335	0.0953292	0.679005	2.25335	0.0953292	3.08745	0.87447	2.2307	0.0310701	11.2725	5.79693	7.10633	3.78992	0	2.45312	4.12585	2.0015
ENSCSAG00000019224			2.24821	0.0104074	0.271742	2.2361	0.0045648	-0.0962146	-2.32193	2.24821	0.0104074	7.51503	21.2554	7.10633	6.31653	13.0215	18.3984	32.1816	33.3584
ENSCSAG00000001541	ELAPOR1		2.24671	0.107479	0.698751	2.24671	0.107479	3.90687	1.67807	2.22785	0.0258121	5.01002	9.66155	5.16824	10.7381	1.44683	0	1.65034	3.33584
ENSCSAG00000019471	SOWAHD	sosondowah ankyrin repeat domain family member D	2.24074	0.20531	0.831446	2.24074	0.20531	2.16992	1.9283e-06	2.23694	0.14899	2.50501	5.79693	1.29206	2.52661	1.44683	1.22656	3.30068	1.33433
ENSCSAG00000006035	HES6	hes family bHLH transcription factor 6	2.23642	0.037675	0.48235	2.23642	0.037675	1.9386	-0.263032	2.22825	0.0185909	11.2725	11.5939	6.4603	3.78992	1.44683	4.90624	6.60136	5.33734
ENSCSAG00000005828	PPM1E		2.23519	0.0387264	0.487218	2.23519	0.0387264	2.32192	0.106917	2.21759	0.0265431	8.76753	5.79693	5.81427	7.57983	1.44683	2.45312	8.2517	4.67017
ENSCSAG00000014354	SCAMP5		2.21311	0.048988	0.53458	2.21311	0.048988	1	-1.16992	2.19847	0.0467033	7.51503	7.72924	5.16824	2.52661	1.44683	7.35937	3.30068	14.6777
ENSCSAG00000004886	ARHGAP9		2.21013	0.0131872	0.307087	2.21013	0.0131872	1.41504	-0.777606	2.20696	0.0123431	8.76753	15.4585	6.4603	8.21149	2.89366	6.1328	12.3776	12.009
ENSCSAG00000016427	TGM4	transglutaminase 4	2.20405	0.054408	0.562399	2.20405	0.054408	3.58495	1.39232	2.19573	0.00820892	13.7776	9.66155	6.4603	15.1597	0	2.45312	3.30068	4.67017
ENSCSAG00000016853	LIMS2	LIM zinc finger domain containing 2	2.20344	0.00900737	0.250135	2.20344	0.00900737	4.24792	2.05063	2.19741	1.72521e-05	27.5551	28.9846	23.2571	35.3726	2.89366	0	9.07687	4.67017
ENSCSAG00000005790	PYROXD2	pyridine nucleotide-disulphide oxidoreductase domain 2	2.19856	0.00464982	0.176579	2.19856	0.00464982	3.07039	0.881356	2.19086	0.000309456	21.2926	21.2554	16.7968	17.6863	2.89366	2.45312	10.7272	8.00601
ENSCSAG00000004102	KCNK6	potassium two pore domain channel subfamily K member 6	2.19096	0.294618	0.891351	2.19938	0.293965	0.736964	-1.32192	2.19096	0.294618	2.50501	1.93231	0.64603	0.631653	2.89366	0	4.12585	0.667167
ENSCSAG00000000298	CCDC160		2.18979	0.0904097	0.669012	2.18979	0.0904097	2.16992	2.21965e-06	2.1673	0.0840698	2.50501	5.79693	5.81427	3.78992	1.44683	1.22656	3.30068	6.67167
ENSCSAG00000001115	MANEAL	mannosidase endo-alpha like	2.18795	0.017675	0.353105	2.18795	0.017675	2.41504	0.247929	2.17854	0.00523945	11.2725	21.2554	12.2746	6.94818	1.44683	4.90624	4.95102	10.6747
ENSCSAG00000012207	PCLO		2.18152	0.144796	0.761935	2.18152	0.144796	2.80735	0.678073	2.15681	0.0676062	3.75751	9.66155	4.52221	3.15826	0	2.45312	0.82517	4.003
ENSCSAG00000014641	MFSD4A	major facilitator superfamily domain containing 4A	2.17816	0.0308793	0.445433	2.17816	0.0308793	2.45943	0.299562	2.16937	0.0131463	10.02	11.5939	10.3365	5.68488	2.89366	1.22656	5.77619	6.67167
ENSCSAG00000003598	CCDC38		2.14654	0.256353	0.865542	2.14654	0.256353	2.80734	0.736964	2.09475	0.17955	2.50501	3.86462	1.93809	3.15826	0	1.22656	0.82517	2.0015
ENSCSAG00000003152			2.12932	0.285663	0.881497	2.15259	0.284153	1.32192	-0.73696	2.12932	0.285663	1.2525	3.86462	0.64603	1.89496	0	2.45312	4.12585	0.667167
ENSCSAG00000010844			2.11827	0.106494	0.698008	2.08408	0.0876164	-0.280106	-2.32192	2.11827	0.106494	7.51503	5.79693	1.93809	1.89496	5.78732	11.039	10.7272	9.34034
ENSCSAG00000015084	SFRP4	secreted frizzled related protein 4	2.10839	0.268495	0.874193	2.10839	0.268495	2.45942	1.37858e-06	2.11912	0.177924	2.50501	7.72924	0	2.52661	1.44683	1.22656	1.65034	1.33433
ENSCSAG00000001961	CHRNB2		2.10029	0.226483	0.846178	2.10029	0.226483	2.32191	0.263036	2.03971	0.219688	2.50501	1.93231	1.93809	4.42157	0	1.22656	1.65034	2.66867
ENSCSAG00000006096	QPRT	quinolinate phosphoribosyltransferase	2.09755	0.120303	0.718076	2.09755	0.120303	2.80735	0.736966	2.08314	0.057302	6.26252	7.72924	6.4603	4.42157	1.44683	1.22656	3.30068	2.66867
ENSCSAG00000014635	CDK18	cyclin dependent kinase 18	2.09656	0.00413141	0.165552	2.09656	0.00413141	1.6845	-0.398548	2.09543	0.00203759	17.5351	27.0523	14.2127	7.57983	7.23415	7.35937	18.1537	10.6747
ENSCSAG00000016426			2.08969	0.0863091	0.659583	2.10108	0.0843607	1.26303	-0.807352	2.08969	0.0863091	3.75751	7.72924	2.58412	5.05322	4.34049	1.22656	9.90204	4.003
ENSCSAG00000008320	SH3BGR		2.08853	0.0294385	0.434073	2.08853	0.0294385	3.12928	1.05889	2.0761	0.00257414	16.2826	19.3231	11.6285	12.6331	4.34049	0	6.60136	4.67017
ENSCSAG00000015376	SV2C	synaptic vesicle glycoprotein 2C	2.07977	0.399785	0.937184	2.07977	0.399785	0.999995	-0.999993	2.47275	0.314153	0	3.86462	0.64603	0.631653	1.44683	1.22656	2.47551	2.0015
ENSCSAG00000011954	ONECUT3		2.06501	0.0137732	0.31152	2.06501	0.0137732	2.05063	1.53792e-06	2.05696	0.00660191	13.7776	15.4585	8.39839	13.8964	5.78732	1.22656	12.3776	10.0075
ENSCSAG00000017119	EPM2A	EPM2A glucan phosphatase, laforin	2.06069	0.00714942	0.218411	2.06069	0.00714942	1.41504	-0.632267	2.05671	0.00585543	15.0301	17.3908	11.6285	8.21149	7.23415	4.90624	19.8041	10.6747
ENSCSAG00000004455	TMEM150C	transmembrane protein 150C	2.05781	0.125975	0.722914	2.05781	0.125975	2.90688	0.87447	2.04526	0.0579266	8.76753	5.79693	3.23015	7.57983	1.44683	1.22656	4.12585	2.0015
ENSCSAG00000014039	LCN2		2.05517	0.11578	0.713274	2.05517	0.11578	3.70042	1.66296	2.02586	0.0373584	8.76753	3.86462	9.04442	10.1064	0	1.22656	2.47551	4.003
ENSCSAG00000007652	ZNF846	zinc finger protein 846	2.05435	0.0263824	0.418524	2.05808	0.0217933	0.932886	-1.10691	2.05435	0.0263824	12.525	7.72924	6.4603	6.94818	5.78732	4.90624	18.1537	10.0075
ENSCSAG00000009047	MROH6	maestro heat like repeat family member 6	2.04836	0.311493	0.900316	2.04836	0.311493	0.999998	-0.999995	2.32583	0.255213	6.26252	0	1.93809	1.26331	1.44683	2.45312	3.30068	2.66867
ENSCSAG00000017884			2.03911	0.226566	0.846178	2.08503	0.187638	1.32192	-0.736962	2.03911	0.226566	1.2525	3.86462	3.23015	2.52661	1.44683	1.22656	3.30068	6.67167
ENSCSAG00000012429	TMEM151B	transmembrane protein 151B	2.03732	0.383263	0.931707	2.03732	0.383263	1.57642e-06	-2.99998	2.41166	0.320812	0	5.79693	0.64603	0	4.34049	2.45312	4.95102	3.33584
ENSCSAG00000002671	PLXDC1	plexin domain containing 1	2.03524	0.271041	0.875014	2.03524	0.271041	2.99998	0.999998	2.02196	0.18467	6.26252	1.93231	5.16824	1.26331	1.44683	0	0.82517	2.0015
ENSCSAG00000019754	PGBD4	piggyBac transposable element derived 4	2.0352	0.188629	0.811046	2.0352	0.188629	1.99999	2.20753e-06	2.0242	0.162536	3.75751	3.86462	1.93809	4.42157	1.44683	1.22656	3.30068	3.33584
ENSCSAG00000019465		coiled-coil domain-containing protein 71	2.03204	0.281614	0.880237	2.03204	0.281614	0.584963	-2.32192	2.07525	0.252744	5.01002	3.86462	0	1.26331	5.78732	0	3.30068	2.0015
ENSCSAG00000009958	KCNIP1	potassium voltage-gated channel interacting protein 1	2.0303	0.093288	0.676475	2.02084	0.0830866	0.830075	-1.16992	2.0303	0.093288	3.75751	11.5939	1.29206	6.94818	2.89366	6.1328	9.90204	8.00601
ENSCSAG00000005921	MAB21L4	mab-21 like 4	2.01645	0.0949942	0.679005	2.01645	0.0949942	1.66296	-0.321926	2.0213	0.0682895	5.01002	13.5262	5.81427	1.89496	4.34049	2.45312	7.42653	2.66867
ENSCSAG00000004170	ZNF585B		2.01212	0.127248	0.725069	2.02236	0.108163	1	-0.999997	2.01212	0.127248	7.51503	1.93231	2.58412	5.05322	4.34049	1.22656	5.77619	10.0075
ENSCSAG00000002969	ANKRD37	ankyrin repeat domain 37	2.00806	0.178597	0.797196	2.00806	0.178597	1.11548	-0.807351	1.99675	0.143174	5.01002	7.72924	1.29206	2.52661	0	6.1328	2.47551	5.33734
ENSCSAG00000018924	LRRC3B	leucine rich repeat containing 3B	2.00358	0.158576	0.778855	2.00358	0.158576	2.16992	0.192647	1.98719	0.13042	2.50501	5.79693	3.87618	3.78992	1.44683	1.22656	1.65034	5.33734
ENSCSAG00000006839	PLAAT4	phospholipase A and acyltransferase 4	1.9994	0.384545	0.933025	2.05271	0.328356	0.58496	-1.41503	1.9994	0.384545	1.2525	1.93231	0.64603	1.89496	1.44683	1.22656	4.95102	2.66867
ENSCSAG00000000097			1.99003	0.488205	0.953987	1.98067	0.484145	0.584959	-2.32191	1.99003	0.488205	1.2525	1.93231	0	1.26331	0	2.45312	4.12585	1.33433
ENSCSAG00000014404	WFDC2	WAP four-disulfide core domain 2	1.98997	0.173427	0.791838	1.96404	0.167545	0.459432	-1.45943	1.98997	0.173427	2.50501	7.72924	1.29206	2.52661	4.34049	3.67968	7.42653	4.003
ENSCSAG00000011145			1.97929	0.0593185	0.581143	1.97929	0.0593185	3.96962	2	1.9748	0.00132666	27.5551	19.3231	19.3809	13.2647	1.44683	2.45312	7.42653	1.33433
ENSCSAG00000013628	ANKEF1	ankyrin repeat and EF-hand domain containing 1	1.97713	0.0212216	0.379589	1.97713	0.0212216	2.20945	0.247929	1.97327	0.0058782	17.5351	19.3231	9.69045	8.84314	4.34049	3.67968	7.42653	9.34034
ENSCSAG00000001201	ARMH1	armadillo like helical domain containing 1	1.96805	0.337988	0.907253	1.96805	0.337988	2.32191	0.415037	1.93314	0.30482	1.2525	3.86462	2.58412	1.26331	0	1.22656	1.65034	1.33433
ENSCSAG00000018981			1.96607	0.0642676	0.591492	1.96607	0.0642676	3.99999	2.04439	1.95407	0.00400267	11.2725	21.2554	16.7968	15.7913	1.44683	1.22656	4.95102	2.66867
ENSCSAG00000013360	LHX6		1.9587	0.142656	0.758222	1.9587	0.142656	2.58496	0.652078	1.93813	0.0890041	6.26252	5.79693	8.39839	3.15826	0	2.45312	3.30068	4.003
ENSCSAG00000008406	PFN4	profilin family member 4	1.945	0.350676	0.915252	1.88379	0.339816	1.49121e-06	-1.80735	1.945	0.350676	2.50501	1.93231	1.29206	1.26331	2.89366	2.45312	4.12585	2.66867
ENSCSAG00000014241	LRRC9	leucine rich repeat containing 9	1.94372	0.107574	0.698751	1.94372	0.107574	0.906891	-0.999997	1.95638	0.100822	8.76753	5.79693	2.58412	2.52661	4.34049	3.67968	7.42653	4.67017
ENSCSAG00000018518	CLDN23	claudin 23	1.94308	0.247416	0.860335	1.94308	0.247416	1.87447	1.70842e-06	1.9454	0.174256	5.01002	5.79693	1.29206	2.52661	1.44683	2.45312	1.65034	2.0015
ENSCSAG00000016287	CARMIL3		1.93894	0.327147	0.902919	1.93894	0.327147	1.58496	-0.321925	2.18645	0.258259	0	5.79693	0.64603	2.52661	1.44683	1.22656	1.65034	3.33584
ENSCSAG00000009553	FMN2		1.93479	0.210346	0.838531	1.93479	0.210346	1.26303	-0.584959	1.92378	0.166074	3.75751	7.72924	1.93809	1.89496	0	4.90624	1.65034	4.003
ENSCSAG00000000392			1.93108	0.103516	0.692057	1.93108	0.103516	1.48543	-0.415035	1.92048	0.0886768	7.51503	5.79693	3.23015	5.68488	4.34049	1.22656	9.07687	3.33584
ENSCSAG00000008378	DRC3		1.9288	0.0437443	0.510141	1.9288	0.0437443	2.87447	0.947534	1.92383	0.019289	5.01002	17.3908	16.1508	10.7381	1.44683	2.45312	6.60136	6.67167
ENSCSAG00000019248	PCED1B	PC-esterase domain containing 1B	1.92106	0.0387066	0.487218	1.92106	0.0387066	2.32193	0.415039	1.91207	0.0157986	12.525	11.5939	9.04442	11.3698	1.44683	3.67968	5.77619	9.34034
ENSCSAG00000019483	DNAJC30	DnaJ heat shock protein family (Hsp40) member C30	1.91963	0.00137664	0.0790258	1.91963	0.00137664	4.38247	2.46467	1.91803	7.82482e-09	71.3928	75.3601	79.4617	58.7437	2.89366	3.67968	14.8531	10.0075
ENSCSAG00000012005	BRINP2	BMP/retinoic acid inducible neural specific 2	1.91742	0.183117	0.80314	1.91742	0.183117	1.37851	-0.485424	1.91908	0.149056	2.50501	9.66155	3.23015	1.89496	2.89366	2.45312	2.47551	4.67017
ENSCSAG00000009539	PTP4A3	protein tyrosine phosphatase 4A3	1.91305	0.0452779	0.516495	1.91305	0.0452779	2.26303	0.362571	1.90639	0.0216993	10.02	13.5262	7.10633	10.7381	2.89366	2.45312	6.60136	6.67167
ENSCSAG00000007413	BMP6		1.90998	0.264673	0.873187	1.90998	0.264673	2.58495	0.678072	2.1162	0.187657	6.26252	0	4.52221	2.52661	0	1.22656	1.65034	2.66867
ENSCSAG00000005070	PBX4		1.90849	0.335161	0.904376	1.83717	0.320152	-0.192643	-2.58495	1.90849	0.335161	1.2525	5.79693	0	1.89496	4.34049	3.67968	6.60136	4.67017
ENSCSAG00000011713	KBTBD8	kelch repeat and BTB domain containing 8	1.90519	0.0705951	0.609716	1.90403	0.0573303	0.765535	-1.12553	1.90519	0.0705951	12.525	3.86462	6.4603	5.05322	4.34049	6.1328	10.7272	13.3433
ENSCSAG00000007173	MAMLD1		1.89476	0.0696984	0.605787	1.89476	0.0696984	1.32193	-0.530512	1.88704	0.0396749	8.76753	21.2554	5.16824	3.78992	1.44683	11.039	8.2517	5.33734
ENSCSAG00000003428	MMAA	metabolism of cobalamin associated A	1.88515	0.0217673	0.385775	1.88515	0.0217673	2.11548	0.241009	1.87325	0.0112841	11.2725	15.4585	12.9206	12.6331	1.44683	4.90624	9.90204	12.009
ENSCSAG00000018001	KATNAL2		1.88283	0.347197	0.91327	1.88283	0.347197	0.485427	-2.32192	1.96448	0.324352	2.50501	3.86462	0	1.26331	2.89366	2.45312	1.65034	2.66867
ENSCSAG00000008776			1.8801	0.0883151	0.665843	1.88893	0.0870157	1.09954	-0.765532	1.8801	0.0883151	11.2725	3.86462	5.81427	4.42157	1.44683	6.1328	5.77619	10.6747
ENSCSAG00000014150		MAPK activated protein kinase 3	1.86799	0.0559795	0.570049	1.86799	0.0559795	1.58496	-0.263032	1.85364	0.0463641	10.02	7.72924	5.81427	8.84314	1.44683	4.90624	11.5524	6.00451
ENSCSAG00000000620	TPBGL	trophoblast glycoprotein like	1.86626	0.245039	0.858983	1.86626	0.245039	2.99998	1.16992	1.82225	0.161742	3.75751	3.86462	4.52221	3.78992	0	1.22656	0.82517	2.66867
ENSCSAG00000018128	SSC4D		1.86516	0.120036	0.718076	1.8478	0.0979303	-0.180571	-2	1.86516	0.120036	5.01002	9.66155	2.58412	2.52661	11.5746	4.90624	17.3286	6.67167
ENSCSAG00000002435	CFAP73	cilia and flagella associated protein 73	1.86077	0.387945	0.933163	1.95403	0.340676	1.58495	-0.321924	1.86077	0.387945	1.2525	1.93231	2.58412	0.631653	1.44683	0	1.65034	3.33584
ENSCSAG00000010149	ARID3C		1.85868	0.171804	0.791838	1.85868	0.171804	2.70043	0.87447	1.83068	0.0935445	5.01002	7.72924	4.52221	6.31653	0	2.45312	3.30068	2.66867
ENSCSAG00000017311		stabilizer of axonemal microtubules 2	1.85833	0.305209	0.898887	1.85833	0.305209	2.80734	0.999998	1.82138	0.222307	2.50501	3.86462	2.58412	3.15826	0	1.22656	0.82517	2.0015
ENSCSAG00000016010	ABLIM2		1.847	0.177985	0.796416	1.847	0.177985	2.70043	0.87447	1.83202	0.104727	2.50501	9.66155	5.16824	6.31653	1.44683	1.22656	0.82517	4.67017
ENSCSAG00000007870	RNF112	ring finger protein 112	1.84319	0.32781	0.902919	1.78297	0.306056	-0.362568	-2.70043	1.84319	0.32781	2.50501	3.86462	0	1.89496	2.89366	6.1328	9.07687	4.003
ENSCSAG00000013908			1.8404	0.217296	0.840963	1.8404	0.217296	1.80735	2.24044e-06	1.8072	0.209437	2.50501	3.86462	2.58412	4.42157	1.44683	1.22656	3.30068	4.003
ENSCSAG00000005061	GMIP		1.84025	0.284481	0.881497	1.84025	0.284481	0.169926	-1.58496	1.91096	0.264479	2.50501	5.79693	0.64603	0.631653	2.89366	4.90624	3.30068	2.66867
ENSCSAG00000009535	HORMAD2		1.83776	0.275828	0.877997	1.83776	0.275828	2.80734	0.999999	1.79867	0.217312	1.2525	5.79693	3.87618	3.78992	1.44683	0	2.47551	2.0015
ENSCSAG00000017401	TMEM255B		1.83722	0.0983978	0.684955	1.83722	0.0983978	1.16993	-0.637427	1.83562	0.0841195	6.26252	11.5939	2.58412	6.31653	5.78732	2.45312	10.7272	3.33584
ENSCSAG00000002849			1.83147	0.236999	0.852617	1.83147	0.236999	2.80734	1	1.78747	0.188084	5.01002	1.93231	3.23015	6.94818	0	1.22656	4.12585	1.33433
ENSCSAG00000004880	GFRA1	GDNF family receptor alpha 1	1.8217	0.0290834	0.434073	1.8217	0.0290834	1.9386	0.125532	1.81257	0.0204371	8.76753	13.5262	12.2746	12.0014	4.34049	2.45312	11.5524	10.0075
ENSCSAG00000014279	PPFIA4		1.81425	0.275643	0.877707	1.81425	0.275643	0.999999	-0.736962	1.8446	0.233733	3.75751	5.79693	1.93809	0.631653	2.89366	2.45312	1.65034	2.66867
ENSCSAG00000003387	NECAB2		1.81233	0.242195	0.855934	1.81233	0.242195	0.999997	-0.807351	2.09478	0.223639	3.75751	0	4.52221	2.52661	1.44683	1.22656	7.42653	6.67167
ENSCSAG00000008381	FKBP1B	FKBP prolyl isomerase 1B	1.79095	0.00849856	0.242799	1.79095	0.00849856	2.66296	0.879707	1.78526	0.000653483	27.5551	28.9846	23.2571	22.7395	7.23415	2.45312	11.5524	12.6762
ENSCSAG00000013619	CRB1		1.79062	0.400083	0.937184	1.70299	0.383453	-0.678069	-2.32192	1.79062	0.400083	1.2525	3.86462	1.29206	0.631653	4.34049	3.67968	3.30068	6.67167
ENSCSAG00000003797	GAB2	GRB2 associated binding protein 2	1.78668	0.103555	0.692057	1.78668	0.103555	1.75489	1.61665e-06	1.78704	0.0507905	15.0301	11.5939	4.52221	4.42157	2.89366	4.90624	4.12585	4.67017
ENSCSAG00000003684	PLXNC1		1.78077	0.117096	0.715426	1.78077	0.117096	1.76553	1.8653e-06	1.77898	0.0944985	2.50501	13.5262	4.52221	6.94818	4.34049	1.22656	6.60136	5.33734
ENSCSAG00000010115	FRMPD2		1.77999	0.37681	0.928563	1.89624	0.314059	1.58495	-0.263031	1.77999	0.37681	1.2525	1.93231	2.58412	1.89496	1.44683	0	0.82517	5.33734
ENSCSAG00000007539	TRIB2		1.7792	0.274706	0.877528	1.77892	0.245163	0.485427	-1.26303	1.7792	0.274706	1.2525	5.79693	2.58412	1.89496	1.44683	3.67968	7.42653	4.67017
ENSCSAG00000018519			1.77701	0.097919	0.684458	1.77701	0.097919	3.2854	1.52356	1.77096	0.0101097	23.7976	15.4585	10.9825	12.0014	0	3.67968	3.30068	4.67017
ENSCSAG00000018985	C6orf120		1.76567	0.000147534	0.0171547	1.76567	0.000147534	1.58496	-0.176877	1.76421	4.30229e-05	38.8276	54.1047	31.6555	36.6359	20.2556	11.039	47.0347	30.6897
ENSCSAG00000006990	IGSF11	immunoglobulin superfamily member 11	1.75964	0.22207	0.842801	1.75964	0.22207	3.90687	2.16992	1.73082	0.0637975	8.76753	5.79693	10.3365	8.21149	1.44683	0	0.82517	3.33584
ENSCSAG00000000614	FAM181B	family with sequence similarity 181 member B	1.75719	0.207886	0.833841	1.75719	0.207886	1.22239	-0.485424	1.76916	0.168197	10.02	3.86462	3.23015	1.89496	4.34049	2.45312	3.30068	4.003
ENSCSAG00000009405	IKZF2	IKAROS family zinc finger 2	1.75406	0.114792	0.712485	1.76084	0.112626	1	-0.736963	1.75406	0.114792	7.51503	5.79693	5.16824	4.42157	2.89366	3.67968	8.2517	7.33884
ENSCSAG00000004942			1.75191	0.235117	0.851723	1.71841	0.203183	-0.485425	-2.16992	1.75191	0.235117	6.26252	3.86462	0.64603	3.15826	8.68098	4.90624	9.07687	8.67318
ENSCSAG00000000755	TNFRSF9		1.74954	0.254383	0.865542	1.74954	0.254383	3.32191	1.58496	1.72942	0.146051	7.51503	1.93231	5.81427	5.68488	1.44683	0	2.47551	2.0015
ENSCSAG00000009593	GLIS2	GLIS family zinc finger 2	1.74287	0.00382898	0.158051	1.74365	0.00216532	0.434403	-1.30256	1.74287	0.00382898	21.2926	28.9846	15.5047	13.8964	17.362	19.625	33.832	40.03
ENSCSAG00000010198	ADAM23	ADAM metallopeptidase domain 23	1.74012	0.179945	0.799455	1.74012	0.179945	1.87447	0.152005	1.72626	0.158891	8.76753	1.93231	5.81427	3.78992	1.44683	2.45312	4.95102	4.003
ENSCSAG00000005370	LSM4	LSM4 homolog, U6 small nuclear RNA and mRNA degradation associated	1.73698	0.00818578	0.23918	1.7321	0.00255597	3.47606	1.73946	1.73698	0.00818578	1052.1	1741.01	655.075	310.142	149.023	101.805	144.405	145.442
ENSCSAG00000001544	MYBPHL	myosin binding protein H like	1.73357	0.312923	0.900728	1.73357	0.312923	2.70043	0.999998	1.74249	0.185026	11.2725	1.93231	3.23015	3.15826	1.44683	1.22656	0.82517	2.0015
ENSCSAG00000000280		60S ribosomal protein L11-like	1.72122	0.0897052	0.669012	1.7259	0.0844622	0.341038	-1.35363	1.72122	0.0897052	8.76753	9.66155	4.52221	4.42157	13.0215	2.45312	14.8531	8.00601
ENSCSAG00000002018	SIGLEC10		1.72043	0.254483	0.865542	1.74481	0.217713	0.485427	-1.22239	1.72043	0.254483	5.01002	1.93231	3.23015	3.15826	1.44683	3.67968	3.30068	10.6747
ENSCSAG00000007221	FAM131B	protein FAM131B	1.7199	0.318233	0.902376	1.70869	0.31117	0.222394	-1.41503	1.7199	0.318233	2.50501	3.86462	0.64603	1.89496	1.44683	4.90624	3.30068	4.67017
ENSCSAG00000017787	CCDC122	coiled-coil domain containing 122	1.70623	0.330294	0.902919	1.70623	0.330294	0.58496	-1.11547	2.07221	0.289758	2.50501	0	3.23015	2.52661	1.44683	1.22656	5.77619	6.67167
ENSCSAG00000000644	PNRC2	proline rich nuclear receptor coactivator 2	1.70618	0.0568841	0.572587	1.70098	0.0316142	-0.691877	-2.38247	1.70618	0.0568841	17.5351	7.72924	9.69045	4.42157	14.4683	28.2109	28.881	44.033
ENSCSAG00000012119	RSPH9	radial spoke head component 9	1.70587	0.0117935	0.292473	1.70587	0.0117935	2.58496	0.884524	1.70311	0.00122387	22.5451	36.7139	22.6111	24.6345	4.34049	6.1328	18.9789	7.33884
ENSCSAG00000017635	SDK1		1.70437	0.708712	0.985922	1.70437	0.708712	7.45115	5.4594	1.98166	0.577117	1.2525	173.908	1.93809	130.12	0	1.22656	1.65034	1.33433
ENSCSAG00000006471	TIGD1		1.70335	0.452126	0.94571	1.70335	0.452126	0.321928	-1.32192	2.07442	0.364664	5.01002	0	1.29206	1.26331	2.89366	1.22656	3.30068	2.0015
ENSCSAG00000006402	APOBEC3C		1.70026	0.000201728	0.0216498	1.70026	0.000201728	4.22055	2.52083	1.69954	3.79362e-11	145.291	115.939	145.357	119.382	4.34049	9.81249	23.1048	22.6837
ENSCSAG00000008667	CDK2AP2	cyclin dependent kinase 2 associated protein 2	1.69901	0.0219788	0.386966	1.69901	0.0219788	2.55459	0.862497	1.69455	0.00335811	27.5551	19.3231	19.3809	20.8445	2.89366	4.90624	16.5034	5.33734
ENSCSAG00000017806	TMEM225B	transmembrane protein 225B	1.69423	0.534461	0.962548	1.69423	0.534461	0.321928	-6.08646	1.79844	0.49995	1.2525	3.86462	0	0	0	3.67968	0.82517	4.003
ENSCSAG00000008775	RNF185	ring finger protein 185	1.69265	0.00123026	0.0723038	1.69265	0.00123026	2.89812	1.2076	1.68923	2.98064e-05	45.0902	36.7139	47.8062	48.6373	5.78732	4.90624	22.2796	20.015
ENSCSAG00000008367	MUC22		1.68307	0.1781	0.796416	1.68307	0.1781	3.16992	1.5025	1.66839	0.062681	7.51503	9.66155	8.39839	8.84314	1.44683	1.22656	0.82517	4.67017
ENSCSAG00000011506	GNG7	G protein subunit gamma 7	1.67783	0.146214	0.764301	1.67783	0.146214	3.32192	1.65208	1.66855	0.0417756	10.02	9.66155	9.69045	12.0014	1.44683	1.22656	2.47551	5.33734
ENSCSAG00000009848	CCN4	cellular communication network factor 4	1.67658	0.318345	0.902376	1.67658	0.318345	0.807354	-0.80735	1.66509	0.318265	5.01002	1.93231	1.29206	2.52661	0	3.67968	4.95102	2.0015
ENSCSAG00000018679	FAM110A	family with sequence similarity 110 member A	1.67656	0.0619245	0.589503	1.67656	0.0619245	2.05889	0.392319	1.66937	0.0328607	12.525	11.5939	11.6285	8.84314	4.34049	2.45312	9.90204	6.00451
ENSCSAG00000001958	ZNF468		1.67599	0.224896	0.846004	1.66333	0.210174	0.137505	-1.48542	1.67599	0.224896	2.50501	7.72924	3.23015	1.89496	1.44683	8.58593	6.60136	6.67167
ENSCSAG00000010223	PHF24	PHD finger protein 24	1.67206	0.37345	0.928563	1.68408	0.371777	1.32192	-0.321925	1.67206	0.37345	1.2525	3.86462	0.64603	3.15826	1.44683	1.22656	3.30068	2.0015
ENSCSAG00000010592			1.66987	0.392529	0.933163	1.66987	0.392529	2.58495	0.999996	1.66158	0.230023	7.51503	3.86462	1.93809	1.89496	0	2.45312	0.82517	1.33433
ENSCSAG00000005259		erb-b2 receptor tyrosine kinase 3	1.66926	0.126312	0.723147	1.66926	0.126312	2.05889	0.415039	1.66344	0.0616011	10.02	15.4585	7.10633	5.05322	4.34049	2.45312	4.95102	4.003
ENSCSAG00000006844	AOC1	amine oxidase copper containing 1	1.66302	0.305447	0.898887	1.66302	0.305447	2.80734	1.16992	1.62234	0.240806	5.01002	1.93231	6.4603	2.52661	0	1.22656	1.65034	2.0015
ENSCSAG00000008079			1.65924	0.0442093	0.510997	1.65924	0.0442093	1.52356	-0.125529	1.64991	0.0382837	12.525	9.66155	9.04442	13.2647	2.89366	4.90624	13.2027	11.3418
ENSCSAG00000004294	TRIM22	tripartite motif containing 22	1.65595	0.125999	0.722914	1.65595	0.125999	2.08746	0.44746	1.64242	0.0832642	11.2725	5.79693	8.39839	6.94818	2.89366	1.22656	4.12585	6.67167
ENSCSAG00000017838	SLC25A15	solute carrier family 25 member 15	1.65538	0.0599758	0.582805	1.65538	0.0599758	2.12928	0.485428	1.65395	0.0239234	20.0401	15.4585	13.5666	6.94818	4.34049	3.67968	9.90204	5.33734
ENSCSAG00000003692	TRPC3	transient receptor potential cation channel subfamily C member 3	1.65521	0.512825	0.957906	1.65521	0.512825	0.999995	-0.584958	2.06022	0.397462	3.75751	0	1.29206	0.631653	1.44683	1.22656	2.47551	0.667167
ENSCSAG00000003758	MAP3K10	mitogen-activated protein kinase kinase kinase 10	1.65309	0.213369	0.839186	1.59849	0.14933	-3.02748	-4.62058	1.65309	0.213369	2.50501	9.66155	2.58412	1.89496	56.4264	50.289	71.7898	50.7047
ENSCSAG00000010762	CREB3L3		1.6498	0.450109	0.945353	1.6498	0.450109	1.58496	1.50017e-06	1.9025	0.345954	0	5.79693	1.93809	0.631653	0	2.45312	1.65034	0.667167
ENSCSAG00000015857	NFATC4	nuclear factor of activated T cells 4	1.6498	0.450109	0.945353	1.6498	0.450109	1.58496	1.50017e-06	1.9025	0.345954	0	5.79693	0.64603	1.89496	0	2.45312	2.47551	1.33433
ENSCSAG00000006421	RHBDL3	rhomboid like 3	1.64942	0.282156	0.880237	1.60979	0.224104	-2.11547	-3.70043	1.64942	0.282156	2.50501	5.79693	2.58412	1.26331	7.23415	31.8906	30.5313	20.6822
ENSCSAG00000014690	RGS20		1.64753	0.154112	0.77006	1.64753	0.154112	2	0.378513	1.62841	0.10089	6.26252	9.66155	6.4603	6.94818	0	3.67968	7.42653	3.33584
ENSCSAG00000001912	VSTM1		1.64692	0.216093	0.840963	1.64692	0.216093	1.80735	0.485428	1.3653	0.187047	8.76753	11.5939	3.23015	3.78992	4.34049	2.45312	0	5.33734
ENSCSAG00000003108	MYPOP		1.64398	0.202	0.824929	1.64398	0.202	1.45943	-0.152001	1.61868	0.182952	2.50501	7.72924	4.52221	4.42157	0	3.67968	7.42653	3.33584
ENSCSAG00000013410	HEY1	hes related family bHLH transcription factor with YRPW motif 1	1.64366	0.154614	0.771352	1.64366	0.154614	1.45943	-0.152001	1.64534	0.109365	5.01002	17.3908	5.16824	3.78992	7.23415	1.22656	4.95102	4.67017
ENSCSAG00000008833	SLC44A4	solute carrier family 44 member 4	1.64055	0.2683	0.874193	1.64055	0.2683	1.80735	0.192647	1.60794	0.258446	2.50501	3.86462	1.93809	5.68488	0	2.45312	1.65034	4.67017
ENSCSAG00000005652	OCEL1		1.63924	0.119809	0.718076	1.63924	0.119809	2.41503	0.788497	1.62096	0.0721134	7.51503	7.72924	8.39839	10.7381	1.44683	2.45312	4.12585	7.33884
ENSCSAG00000000315	RAB9B	RAB9B, member RAS oncogene family	1.63693	0.398198	0.936642	1.63693	0.398198	2.32191	0.736964	1.58529	0.367476	1.2525	3.86462	1.93809	2.52661	1.44683	0	2.47551	0.667167
ENSCSAG00000018258			1.63613	0.211867	0.838558	1.63613	0.211867	1.58496	2.09172e-06	1.62848	0.140004	7.51503	9.66155	1.93809	5.05322	0	6.1328	4.12585	3.33584
ENSCSAG00000010502	CCDC167		1.62032	0.000843909	0.0591791	1.62032	0.000843909	2.65535	1.03814	1.61804	6.51892e-06	52.6052	73.4278	54.2665	61.2703	15.9151	3.67968	34.6571	21.3494
ENSCSAG00000001314	TMEM61		1.61481	0.315319	0.902312	1.61481	0.315319	3.58494	1.99999	1.58474	0.14896	7.51503	3.86462	6.4603	5.68488	1.44683	0	0.82517	2.0015
ENSCSAG00000008154	TMEM151A	transmembrane protein 151A	1.61481	0.461405	0.949746	1.61481	0.461405	1.99998	0.415037	1.92832	0.358507	3.75751	0	2.58412	1.26331	0	1.22656	1.65034	1.33433
ENSCSAG00000012366			1.61331	0.0396371	0.491115	1.61331	0.0396371	1.848	0.241009	1.61343	0.0223021	12.525	23.1877	16.7968	9.47479	5.78732	3.67968	10.7272	10.6747
ENSCSAG00000019265	FAM43A	family with sequence similarity 43 member A	1.61327	0.0232407	0.396183	1.61327	0.0232407	0.956932	-0.646362	1.61078	0.0229035	16.2826	17.3908	11.6285	11.3698	10.1278	7.35937	22.2796	14.0105
ENSCSAG00000011194	ZNF25		1.61126	0.390134	0.933163	1.60772	0.347502	1.23349e-06	-1.58496	1.61126	0.390134	1.2525	3.86462	3.23015	1.26331	2.89366	2.45312	5.77619	6.00451
ENSCSAG00000001667	ZNF471	zinc finger protein 471	1.61	0.406378	0.939876	1.51511	0.390933	-1.11547	-2.58495	1.61	0.406378	3.75751	1.93231	0.64603	1.26331	5.78732	7.35937	7.42653	4.67017
ENSCSAG00000004923	PLLP	plasmolipin	1.60916	0.218025	0.840963	1.60916	0.218025	2.80735	1.22239	1.58578	0.11543	7.51503	5.79693	5.81427	7.57983	0	2.45312	4.12585	2.0015
ENSCSAG00000012294			1.60915	0.46686	0.949749	1.60915	0.46686	1.58495	2.34582e-06	1.99645	0.371903	2.50501	0	1.29206	2.52661	1.44683	0	3.30068	0.667167
ENSCSAG00000010369			1.60852	0.00050894	0.0427302	1.60852	0.00050894	2.19068	0.584963	1.607	3.79057e-05	52.6052	52.1724	39.4078	51.1639	10.1278	13.4922	33.0068	26.6867
ENSCSAG00000016850	LONRF1	LON peptidase N-terminal domain and ring finger 1	1.6048	0.0126192	0.299511	1.60177	0.0104449	0.754888	-0.842458	1.6048	0.0126192	15.0301	38.6462	17.4428	12.0014	17.362	14.7187	28.881	23.3509
ENSCSAG00000000540	SMIM6		1.60254	0.0245858	0.408696	1.60254	0.0245858	1.5025	-0.0931082	1.59704	0.0183048	18.7876	15.4585	18.7349	10.7381	7.23415	4.90624	10.7272	20.6822
ENSCSAG00000002606	MPZL3	myelin protein zero like 3	1.59784	0.194464	0.815245	1.59784	0.194464	3.16992	1.58496	1.58594	0.0733498	7.51503	9.66155	9.69045	7.57983	1.44683	1.22656	4.12585	2.0015
ENSCSAG00000001837	CRNN		1.59669	0.291021	0.887697	1.59669	0.291021	3.16991	1.58496	1.57152	0.184369	2.50501	5.79693	6.4603	5.68488	0	1.22656	0.82517	2.66867
ENSCSAG00000009845	TIMP4	TIMP metallopeptidase inhibitor 4	1.59252	0.228023	0.846178	1.59252	0.228023	5.1699	3.58496	1.58126	0.00926007	12.525	23.1877	19.3809	29.056	1.44683	0	1.65034	2.0015
ENSCSAG00000005720	PRSS36	serine protease 36	1.59101	0.410375	0.939876	1.59101	0.410375	0.485427	-0.999995	1.64116	0.372822	2.50501	3.86462	0.64603	0.631653	4.34049	1.22656	3.30068	0.667167
ENSCSAG00000016872			1.58764	0.538193	0.9642	1.62548	0.516166	1.58495	1.97004e-06	1.58764	0.538193	2.50501	0	0	2.52661	0	1.22656	0	3.33584
ENSCSAG00000002447	TECTA		1.5832	0.322856	0.902503	1.51009	0.282308	-1.68805	-3.16992	1.5832	0.322856	2.50501	5.79693	0.64603	1.89496	14.4683	14.7187	19.8041	6.67167
ENSCSAG00000013003	SLC24A1		1.58082	0.488389	0.953987	1.62559	0.444516	0.58496	-0.999994	1.58082	0.488389	1.2525	1.93231	1.93809	0.631653	1.44683	1.22656	1.65034	4.003
ENSCSAG00000003254	TRPC6		1.57816	0.325584	0.902919	1.57816	0.325584	1.80735	0.263036	1.55646	0.294859	2.50501	3.86462	3.23015	2.52661	1.44683	1.22656	4.12585	0.667167
ENSCSAG00000013014	DLX6		1.57016	0.0261226	0.41653	1.57016	0.0261226	2.66296	1.09954	1.56617	0.00297573	26.3026	30.917	23.2571	22.1079	4.34049	4.90624	8.2517	12.6762
ENSCSAG00000016512	PIWIL2	piwi like RNA-mediated gene silencing 2	1.56981	0.284762	0.881497	1.57916	0.265492	0.678072	-0.874466	1.56981	0.284762	6.26252	1.93231	1.93809	3.78992	4.34049	1.22656	5.77619	5.33734
ENSCSAG00000002639	NIT1		1.56909	0.0114221	0.287673	1.55893	0.00803992	2.67054	1.10343	1.56909	0.0114221	115.23	266.659	85.276	73.9034	21.7024	38.0234	40.4333	34.0255
ENSCSAG00000009010	CLDN16	claudin 16	1.56481	0.369595	0.927897	2.24676	0.283196	1.41503	-6.56318e-12	1.56481	0.369595	3.75751	3.86462	0.64603	0.631653	2.89366	0	0	2.0015
ENSCSAG00000001871			1.56409	0.401915	0.937524	1.59501	0.380593	0.736964	-0.80735	1.56409	0.401915	1.2525	3.86462	3.23015	1.26331	2.89366	0	3.30068	4.003
ENSCSAG00000013016			1.56357	0.391511	0.933163	1.58971	0.36929	0.736964	-0.80735	1.56357	0.391511	2.50501	1.93231	1.29206	2.52661	1.44683	2.45312	5.77619	0.667167
ENSCSAG00000005165	DUSP5		1.56235	0.0769568	0.626931	1.5568	0.0726154	0.754888	-0.793547	1.56235	0.0769568	6.26252	21.2554	7.75236	6.94818	7.23415	8.58593	15.6782	10.0075
ENSCSAG00000016016	DDC	dopa decarboxylase	1.56226	0.293588	0.889796	1.56226	0.293588	3.45941	1.90689	1.53776	0.16582	8.76753	1.93231	6.4603	9.47479	1.44683	0	0.82517	2.66867
ENSCSAG00000004276	THAP8	THAP domain containing 8	1.55661	0.0304909	0.443249	1.55661	0.0304909	1.75002	0.19931	1.5526	0.0167865	16.2826	21.2554	12.9206	17.6863	7.23415	3.67968	15.6782	11.3418
ENSCSAG00000012453	FCHSD1	FCH and double SH3 domains 1	1.53742	0.0678039	0.599882	1.53002	0.0659979	0.39855	-1.11548	1.53742	0.0678039	15.0301	13.5262	6.4603	5.68488	13.0215	8.58593	14.0279	12.009
ENSCSAG00000010016	CLPSL1		1.53538	0.297169	0.892726	1.60017	0.290786	2.32191	0.736966	1.53538	0.297169	1.2525	3.86462	4.52221	5.05322	1.44683	0	3.30068	2.66867
ENSCSAG00000005593		PR/SET domain 11	1.53462	0.142228	0.757279	1.51955	0.122926	-0.201633	-1.70044	1.53462	0.142228	10.02	9.66155	5.81427	1.89496	17.362	6.1328	15.6782	10.0075
ENSCSAG00000014312	SLPI	secretory leukocyte peptidase inhibitor	1.5305	0.130391	0.730165	1.5305	0.130391	3.39231	1.8625	1.51899	0.0507172	3.75751	17.3908	26.4872	13.8964	0	2.45312	6.60136	4.003
ENSCSAG00000004139			1.52748	0.170034	0.790767	1.52386	0.153179	0.584963	-0.925997	1.52748	0.170034	8.76753	5.79693	1.93809	7.57983	5.78732	3.67968	9.90204	8.67318
ENSCSAG00000004277			1.52609	0.250573	0.862604	1.52609	0.250573	1.16992	-0.321925	1.49815	0.248419	5.01002	3.86462	5.16824	2.52661	0	3.67968	5.77619	4.003
ENSCSAG00000017870	RNF125	ring finger protein 125	1.52603	0.29942	0.894141	1.52603	0.29942	3.32191	1.80735	1.50273	0.173227	3.75751	5.79693	6.4603	8.21149	1.44683	0	0.82517	2.66867
ENSCSAG00000007941		cystatin B	1.52266	0.00230489	0.113624	1.52266	0.00230489	2.80735	1.28798	1.52008	2.66226e-05	55.1102	63.7662	54.2665	51.1639	5.78732	11.039	21.4544	22.0165
ENSCSAG00000014287	HOXA6		1.51776	0.274658	0.877528	1.49426	0.227112	-0.847995	-2.32192	1.51776	0.274658	3.75751	5.79693	3.23015	1.89496	7.23415	11.039	12.3776	12.6762
ENSCSAG00000010334	CFAP52	cilia and flagella associated protein 52	1.51595	0.0696505	0.605787	1.51595	0.0696505	2.72246	1.20945	1.51184	0.0230059	22.5451	9.66155	18.0888	18.9496	2.89366	2.45312	6.60136	9.34034
ENSCSAG00000015095	TRIM9		1.51549	0.329002	0.902919	1.51881	0.320616	0.807354	-0.678068	1.51549	0.329002	2.50501	3.86462	3.23015	1.89496	2.89366	1.22656	3.30068	5.33734
ENSCSAG00000003393	ZNF576	zinc finger protein 576	1.51292	0.0837344	0.651197	1.51292	0.0837344	2.14684	0.643857	1.50703	0.0369926	18.7876	11.5939	14.8587	10.1064	1.44683	6.1328	9.07687	7.33884
ENSCSAG00000012916	MAGIX		1.50636	0.217701	0.840963	1.50636	0.217701	0.70044	-0.777605	1.50865	0.214496	8.76753	3.86462	3.23015	3.78992	5.78732	2.45312	4.95102	6.67167
ENSCSAG00000018307			1.49964	0.0356691	0.470414	1.49964	0.0356691	1.73697	0.245114	1.49498	0.0173368	22.5451	17.3908	16.7968	14.528	7.23415	4.90624	8.2517	18.6807
ENSCSAG00000000353	RNASE10	ribonuclease A family member 10 (inactive)	1.49919	0.246873	0.860335	1.49919	0.246873	1.45943	2.36247e-06	1.46925	0.215963	5.01002	5.79693	5.16824	4.42157	0	3.67968	6.60136	2.0015
ENSCSAG00000016081	TCF7L1		1.49863	0.102724	0.692057	1.49863	0.102724	4.79007	3.28951	1.49962	0.000395908	38.8276	44.4431	34.8856	53.0588	1.44683	2.45312	4.12585	4.67017
ENSCSAG00000008834	AMMECR1		1.49813	0.124359	0.722041	1.49813	0.124359	2.67807	1.18443	1.49889	0.0464652	23.7976	7.72924	11.6285	12.6331	4.34049	1.22656	4.95102	6.00451
ENSCSAG00000014653	TMEM17	transmembrane protein 17	1.49316	0.0384714	0.486692	1.49316	0.0384714	2.72792	1.24101	1.48772	0.0043011	23.7976	28.9846	23.9031	27.7927	4.34049	3.67968	4.12585	18.0135
ENSCSAG00000008606	BORCS5	BLOC-1 related complex subunit 5	1.48784	0.0459092	0.518795	1.48784	0.0459092	2.24793	0.765536	1.4886	0.0147269	16.2826	40.5785	15.5047	18.3179	7.23415	4.90624	9.07687	11.3418
ENSCSAG00000000607	FUT4	fucosyltransferase 4	1.48777	0.148291	0.767335	1.48876	0.133112	0.540569	-0.932884	1.48777	0.148291	6.26252	9.66155	6.4603	5.05322	4.34049	7.35937	11.5524	8.67318
ENSCSAG00000005968	RTN4RL2		1.48552	0.103897	0.692057	1.48552	0.103897	2.70044	1.22239	1.48379	0.0262458	25.0501	13.5262	16.1508	12.0014	1.44683	4.90624	6.60136	5.33734
ENSCSAG00000011511	TNFSF12-TNFSF13	TNF superfamily member 13	1.48418	0.158586	0.778855	1.47128	0.10818	-1.074	-2.53605	1.48418	0.158586	3.75751	15.4585	6.4603	4.42157	21.7024	18.3984	35.4823	22.6837
ENSCSAG00000015252	HSD11B1	hydroxysteroid 11-beta dehydrogenase 1	1.484	0.358049	0.919568	1.90318	0.272589	2.32191	0.807355	1.484	0.358049	1.2525	3.86462	3.23015	3.78992	1.44683	0	4.12585	0
ENSCSAG00000010027	ZNF597	zinc finger protein 597	1.48253	0.349571	0.914699	1.48253	0.349571	0.847997	-0.584959	1.49486	0.32342	5.01002	3.86462	0.64603	2.52661	2.89366	2.45312	1.65034	4.003
ENSCSAG00000006501	EN2		1.48139	0.548496	0.965405	1.48139	0.548496	3.22238	1.64385	1.58408	0.488891	2.50501	25.12	1.29206	24.0028	2.89366	0	5.77619	2.0015
ENSCSAG00000014936	TBX20	T-box transcription factor 20	1.48108	0.124536	0.722419	1.48108	0.124536	2.05063	0.584964	1.47467	0.0566793	13.7776	15.4585	8.39839	10.1064	1.44683	6.1328	4.95102	7.33884
ENSCSAG00000011059	RET		1.4798	0.224973	0.846004	1.4798	0.224973	1.58496	0.125533	1.44315	0.222757	5.01002	3.86462	8.39839	4.42157	1.44683	2.45312	9.07687	2.0015
ENSCSAG00000018685	DNAJC28	DnaJ heat shock protein family (Hsp40) member C28	1.47648	0.00821683	0.23918	1.47648	0.00821683	1.79518	0.321929	1.47352	0.00316295	27.5551	30.917	25.1952	29.6877	10.1278	7.35937	21.4544	23.3509
ENSCSAG00000003801	LGALS13		1.47474	0.225535	0.846178	1.48066	0.21066	0.652077	-0.807352	1.47474	0.225535	5.01002	5.79693	3.87618	4.42157	2.89366	3.67968	6.60136	6.67167
ENSCSAG00000001997	ZNF614		1.4693	0.144858	0.761935	1.4693	0.144858	1.32193	-0.125529	1.47258	0.101128	11.2725	13.5262	4.52221	5.68488	5.78732	3.67968	4.95102	6.67167
ENSCSAG00000018456	ADRB1	adrenoceptor beta 1	1.46731	0.486144	0.953838	1.36298	0.483239	-0.847993	-2.16992	1.46731	0.486144	1.2525	3.86462	1.29206	1.26331	4.34049	4.90624	5.77619	3.33584
ENSCSAG00000018579	MC5R	melanocortin 5 receptor	1.46492	0.134595	0.740604	1.46492	0.134595	2	0.547489	1.4533	0.0854508	10.02	9.66155	9.69045	9.47479	1.44683	3.67968	5.77619	7.33884
ENSCSAG00000001539	TMEM167B		1.46032	0.0659716	0.597541	1.46032	0.0659716	3.32193	1.86673	1.45289	0.00450465	21.2926	28.9846	34.2396	28.4244	0	4.90624	5.77619	11.3418
ENSCSAG00000008562	ZNF454		1.46025	0.210982	0.838558	1.45187	0.194614	0.347924	-1.08746	1.46025	0.210982	3.75751	9.66155	2.58412	5.05322	7.23415	3.67968	8.2517	9.34034
ENSCSAG00000002013	FAM189B	family with sequence similarity 189 member B	1.45441	0.353593	0.917768	1.503	0.310371	1.32192	-0.169922	1.45441	0.353593	1.2525	3.86462	4.52221	3.15826	1.44683	1.22656	4.12585	5.33734
ENSCSAG00000012693	DNAL1		1.44993	0.00627713	0.20435	1.44993	0.00627713	2.23133	0.786597	1.44758	0.000391067	57.6152	50.2401	38.1158	30.951	15.9151	7.35937	22.2796	18.0135
ENSCSAG00000014755	CDH22		1.44992	0.325623	0.902919	1.44992	0.325623	1.16992	-0.222389	1.4212	0.302099	5.01002	3.86462	3.23015	3.15826	4.34049	0	5.77619	0.667167
ENSCSAG00000019523	LRRC61	leucine rich repeat containing 61	1.43997	0.0882152	0.665843	1.43857	0.0859518	0.530515	-0.893083	1.43997	0.0882152	13.7776	11.5939	8.39839	6.31653	8.68098	8.58593	17.3286	8.67318
ENSCSAG00000016648	INHBB	inhibin subunit beta B	1.43736	0.10396	0.692057	1.43736	0.10396	2.32193	0.893086	1.43226	0.043405	15.0301	15.4585	10.9825	14.528	4.34049	2.45312	5.77619	8.00601
ENSCSAG00000010034	ZSCAN32	zinc finger and SCAN domain containing 32	1.43654	0.113305	0.710801	1.43654	0.113305	1.05889	-0.362568	1.43585	0.0947842	15.0301	9.66155	5.81427	8.21149	5.78732	6.1328	11.5524	6.00451
ENSCSAG00000009974	MAP2	microtubule associated protein 2	1.43582	0.0348597	0.465626	1.43582	0.0348597	2.8413	1.40809	1.4283	0.00667317	16.2826	27.0523	29.7174	38.5308	1.44683	4.90624	10.7272	14.6777
ENSCSAG00000017348		cilia and flagella associated protein 206	1.43049	0.12544	0.722914	1.43049	0.12544	2.20163	0.777609	1.42345	0.0719228	7.51503	15.4585	10.3365	13.8964	1.44683	3.67968	8.2517	6.00451
ENSCSAG00000005618	BIK		1.42858	0.0214208	0.382045	1.42858	0.0214208	1.72935	0.304855	1.42907	0.00845089	37.5751	25.12	26.4872	16.423	11.5746	7.35937	20.6293	13.3433
ENSCSAG00000014629	LEMD1		1.42759	0.363827	0.922675	1.42759	0.363827	1.99999	0.584964	1.58717	0.280994	0	7.72924	3.87618	5.05322	0	2.45312	4.95102	0.667167
ENSCSAG00000014786	FIBCD1	fibrinogen C domain containing 1	1.4193	0.307422	0.898887	1.4193	0.307422	1.58496	0.192647	1.39745	0.280675	5.01002	3.86462	3.23015	5.05322	1.44683	2.45312	4.12585	2.66867
ENSCSAG00000015491	SCN3A		1.41834	0.318959	0.902376	1.41834	0.318959	0.652077	-0.736962	1.43195	0.315623	1.2525	9.66155	1.93809	4.42157	1.44683	6.1328	6.60136	3.33584
ENSCSAG00000016528	OBSCN		1.41728	0.189099	0.81131	1.41272	0.140096	-0.485426	-1.88752	1.41728	0.189099	5.01002	9.66155	3.87618	5.68488	10.1278	11.039	19.8041	16.6792
ENSCSAG00000003838	FAM241A	family with sequence similarity 241 member A	1.41371	0.259233	0.867809	1.41371	0.259233	1.58496	0.192646	1.43081	0.18636	3.75751	17.3908	5.16824	3.15826	2.89366	3.67968	4.12585	2.66867
ENSCSAG00000016763	ZBTB47	zinc finger and BTB domain containing 47	1.40949	0.0417019	0.500762	1.41073	0.0256514	0.137504	-1.26748	1.40949	0.0417019	13.7776	19.3231	10.9825	15.7913	17.362	13.4922	28.881	36.027
ENSCSAG00000006298	VPS37C	VPS37C subunit of ESCRT-I	1.40863	0.27664	0.877997	1.47388	0.233638	2.32192	0.847998	1.40863	0.27664	1.2525	3.86462	4.52221	12.6331	1.44683	0	4.95102	4.67017
ENSCSAG00000007881	SLC17A3	solute carrier family 17 member 3	1.39974	0.0683513	0.601393	1.39974	0.0683513	2	0.610054	1.39526	0.025313	25.0501	19.3231	13.5666	15.1597	7.23415	3.67968	6.60136	12.009
ENSCSAG00000009943	TSPAN33		1.39903	0.094655	0.679005	1.39035	0.0877678	0.430635	-0.951089	1.39903	0.094655	7.51503	23.1877	7.75236	6.94818	10.1278	13.4922	11.5524	17.3464
ENSCSAG00000014481	CAMKV	CaM kinase like vesicle associated	1.3868	0.293089	0.889428	1.3868	0.293089	1.87447	0.514575	1.36669	0.238014	5.01002	5.79693	5.16824	5.05322	2.89366	0	3.30068	4.003
ENSCSAG00000009730	TMEM179		1.38621	0.131679	0.733447	1.38621	0.131679	2.54432	1.16993	1.37943	0.0427442	13.7776	21.2554	11.6285	14.528	1.44683	4.90624	6.60136	4.67017
ENSCSAG00000008521		DNA polymerase delta 4, accessory subunit	1.38495	0.00952727	0.256274	1.38495	0.00952727	1.91073	0.530515	1.38259	0.0013055	43.8377	50.2401	36.8237	28.4244	11.5746	13.4922	33.0068	12.009
ENSCSAG00000007427	ANGPTL6		1.38092	0.509806	0.957906	1.38092	0.509806	1.32192	1.35829e-06	1.38179	0.479451	1.2525	3.86462	1.93809	1.26331	1.44683	1.22656	1.65034	0.667167
ENSCSAG00000007571	PTHLH	parathyroid hormone like hormone	1.37928	0.5098	0.957906	1.37928	0.5098	0.321929	-0.999994	1.67515	0.427106	5.01002	0	1.29206	1.89496	0	3.67968	4.95102	0.667167
ENSCSAG00000019210	CHRM4	cholinergic receptor muscarinic 4	1.37865	0.32366	0.902503	1.37865	0.32366	2.80735	1.45943	1.3678	0.149303	11.2725	9.66155	7.10633	4.42157	1.44683	2.45312	0.82517	3.33584
ENSCSAG00000010921	ZNF32	zinc finger protein 32	1.37571	0.0142745	0.316525	1.37121	0.00679311	-0.347923	-1.71621	1.37571	0.0142745	25.0501	40.5785	12.9206	22.1079	46.2986	38.0234	51.1605	64.0481
ENSCSAG00000002891		caspase recruitment domain-containing protein 8	1.37206	0.189941	0.811331	1.37206	0.189941	2.43296	1.078	1.36312	0.0840825	12.525	13.5262	11.6285	6.94818	2.89366	2.45312	7.42653	2.0015
ENSCSAG00000013199	SNAPC5	small nuclear RNA activating complex polypeptide 5	1.36726	0.00878705	0.248738	1.36726	0.00878705	2.27798	0.913586	1.365	0.000835534	41.3327	56.037	39.4078	42.3207	13.0215	7.35937	25.5803	17.3464
ENSCSAG00000016902			1.36641	0.556055	0.965405	1.36641	0.556055	1.73705e-06	-2.32191	1.47271	0.525388	1.2525	3.86462	0	1.26331	4.34049	1.22656	3.30068	2.0015
ENSCSAG00000009200	FREM1		1.3658	0.536713	0.963887	1.3658	0.536713	-0.485424	-2.80734	1.46773	0.516847	2.50501	1.93231	0	1.26331	2.89366	3.67968	4.12585	2.66867
ENSCSAG00000012182	CEBPZOS		1.36484	0.00229658	0.113624	1.36484	0.00229658	2.70044	1.33704	1.36347	2.94079e-05	70.1403	73.4278	81.3998	62.5336	7.23415	14.7187	32.1816	24.6852
ENSCSAG00000002473	ABI3		1.36457	0.435844	0.944434	1.36457	0.435844	0.999998	-0.321925	1.3571	0.424828	3.75751	1.93231	1.93809	1.89496	1.44683	2.45312	3.30068	2.0015
ENSCSAG00000009372	MAP1LC3C	microtubule associated protein 1 light chain 3 gamma	1.36456	0.0449326	0.51491	1.36456	0.0449326	2.02237	0.662966	1.36435	0.0132178	27.5551	36.7139	24.5492	12.6331	8.68098	7.35937	15.6782	8.00601
ENSCSAG00000018388	PRKAB2	protein kinase AMP-activated non-catalytic subunit beta 2	1.36455	0.0177105	0.353124	1.36455	0.0177105	2.52838	1.16506	1.36326	0.0021791	40.0802	34.7816	31.0095	42.9524	7.23415	6.1328	16.5034	16.012
ENSCSAG00000010934	SERPINA2	putative alpha-1-antitrypsin-related protein	1.36443	0.479479	0.953409	1.36443	0.479479	1.32192	1.9283e-06	1.3487	0.470329	1.2525	3.86462	0.64603	3.15826	1.44683	1.22656	0.82517	3.33584
ENSCSAG00000015815	PURG	purine rich element binding protein G	1.36098	0.340548	0.908074	1.36098	0.340548	0.152004	-1.16992	1.39124	0.336391	3.75751	5.79693	1.93809	1.89496	2.89366	6.1328	5.77619	3.33584
ENSCSAG00000001235	DMBX1		1.36009	0.339671	0.907394	1.36009	0.339671	2.32192	0.999999	1.35527	0.185298	7.51503	11.5939	3.87618	4.42157	2.89366	1.22656	0.82517	2.66867
ENSCSAG00000006757	MAFF	MAF bZIP transcription factor F	1.35606	0.324743	0.902503	1.35606	0.324743	2.32192	1	1.33716	0.208252	8.76753	5.79693	4.52221	5.05322	2.89366	0	1.65034	3.33584
ENSCSAG00000005460	ELOVL3	ELOVL fatty acid elongase 3	1.3559	0.322336	0.902423	1.3559	0.322336	2.80735	1.80735	0.99886	0.317719	7.51503	5.79693	6.4603	8.21149	1.44683	1.22656	4.12585	0
ENSCSAG00000003596	NUDT7	nudix hydrolase 7	1.35335	0.368094	0.926	1.35335	0.368094	1.99999	0.678072	1.32516	0.320652	3.75751	3.86462	3.87618	4.42157	0	2.45312	2.47551	3.33584
ENSCSAG00000008420			1.35206	0.121404	0.718076	1.3405	0.0799656	-0.943415	-2.27684	1.35206	0.121404	13.7776	11.5939	9.04442	4.42157	23.1493	26.9843	26.4054	37.3614
ENSCSAG00000000653	PTAFR	platelet activating factor receptor	1.34963	0.978037	0.999686	1.34963	0.978037	1.99997	1.71883e-06	1.94923	0.716166	3.75751	0	2.58412	0	1.44683	0	1.65034	1.33433
ENSCSAG00000013006	DCLRE1C		1.34962	0.221911	0.842801	1.34962	0.221911	2.03562	0.722471	1.31642	0.0403317	23.7976	17.3908	21.965	10.7381	0	9.81249	9.90204	10.0075
ENSCSAG00000002404	SCN3B	sodium voltage-gated channel beta subunit 3	1.34913	0.341911	0.910169	1.34913	0.341911	2	0.678072	1.34392	0.257146	6.26252	5.79693	3.87618	3.78992	1.44683	2.45312	2.47551	3.33584
ENSCSAG00000007055	PIPOX	pipecolic acid and sarcosine oxidase	1.34898	0.45086	0.945353	1.34898	0.45086	2.32191	0.999998	1.3033	0.425338	2.50501	1.93231	2.58412	3.15826	0	1.22656	0.82517	2.0015
ENSCSAG00000014314	L3HYPDH		1.34776	0.0994982	0.687635	1.34776	0.0994982	2.04439	0.70627	1.3392	0.0469903	21.2926	11.5939	16.1508	15.1597	1.44683	7.35937	11.5524	7.33884
ENSCSAG00000012891	PRICKLE3	prickle planar cell polarity protein 3	1.34757	0.0269883	0.421399	1.34757	0.0269883	1	-0.341036	1.34983	0.0183994	25.0501	34.7816	13.5666	16.423	17.362	13.4922	16.5034	20.6822
ENSCSAG00000015215	ATP6V1B1	ATPase H+ transporting V1 subunit B1	1.34727	0.315469	0.90232	1.34727	0.315469	1.32193	1.78918e-06	1.3612	0.263058	5.01002	9.66155	0.64603	5.68488	4.34049	2.45312	1.65034	4.67017
ENSCSAG00000002733	FAM222A	family with sequence similarity 222 member A	1.34655	0.413125	0.94091	1.34655	0.413125	2.32191	0.999999	1.28376	0.401554	2.50501	1.93231	5.16824	3.15826	0	1.22656	0.82517	3.33584
ENSCSAG00000009805	RASL10A	RAS like family 10 member A	1.34621	0.460564	0.949685	1.36203	0.446479	0.736964	-0.584959	1.34621	0.460564	2.50501	1.93231	2.58412	0.631653	1.44683	2.45312	0.82517	4.67017
ENSCSAG00000007149	HGD	homogentisate 1,2-dioxygenase	1.34494	0.5591	0.965405	1.34494	0.5591	1.32192	-0.584958	1.39211	0.522892	1.2525	3.86462	1.93809	0	1.44683	1.22656	2.47551	1.33433
ENSCSAG00000002072	SYT11	synaptotagmin 11	1.34355	0.545856	0.965405	1.34355	0.545856	1.32192	1.35829e-06	1.67584	0.427085	5.01002	0	1.93809	0.631653	1.44683	1.22656	1.65034	1.33433
ENSCSAG00000004346	DYRK2	dual specificity tyrosine phosphorylation regulated kinase 2	1.34348	4.33108e-06	0.000989507	1.3425	3.60747e-06	0.436099	-0.905363	1.34348	4.33108e-06	122.745	175.84	66.5411	59.3754	104.172	116.523	111.398	124.76
ENSCSAG00000000632	B3GALT6	beta-1,3-galactosyltransferase 6	1.34078	0.00650457	0.207851	1.34187	0.00576032	0.59561	-0.742841	1.34078	0.00650457	31.3126	36.7139	25.1952	24.0028	20.2556	24.5312	48.685	32.6912
ENSCSAG00000014556	WIPF1	WAS/WASL interacting protein family member 1	1.33639	0.107016	0.698462	1.33639	0.107016	2.87447	1.54749	1.33327	0.0138321	25.0501	40.5785	17.4428	20.8445	7.23415	2.45312	4.12585	8.67318
ENSCSAG00000002940	FAM149A	family with sequence similarity 149 member A	1.33563	0.34785	0.91327	1.32383	0.262982	-2.20945	-3.52356	1.33563	0.34785	3.75751	3.86462	2.58412	3.15826	14.4683	23.3047	35.4823	34.0255
ENSCSAG00000004195	PMFBP1	polyamine modulated factor 1 binding protein 1	1.33504	0.472045	0.950683	1.33504	0.472045	0.652078	-0.58496	1.39835	0.380635	2.50501	7.72924	0.64603	1.26331	1.44683	6.1328	2.47551	1.33433
ENSCSAG00000001948	IL6R		1.3336	0.0288223	0.432283	1.3336	0.0288223	1.02466	-0.302562	1.33571	0.0192579	27.5551	30.917	12.9206	17.0546	14.4683	14.7187	19.8041	16.6792
ENSCSAG00000009213	LRMDA		1.33244	0.146457	0.764301	1.33244	0.146457	2.32193	1	1.32568	0.0653557	11.2725	19.3231	12.2746	13.8964	1.44683	4.90624	4.95102	8.00601
ENSCSAG00000019479			1.33105	0.292067	0.888364	1.33105	0.292067	2.32192	1	1.31022	0.234297	3.75751	5.79693	5.81427	8.21149	1.44683	1.22656	4.95102	2.0015
ENSCSAG00000002426	RITA1	RBPJ interacting and tubulin associated 1	1.32945	0.143556	0.75911	1.33041	0.118825	0.621489	-0.706267	1.32945	0.143556	5.01002	15.4585	6.4603	13.2647	7.23415	6.1328	17.3286	14.0105
ENSCSAG00000018441	FGFBP3	fibroblast growth factor binding protein 3	1.3265	0.185603	0.805455	1.3265	0.185603	1.43296	0.125532	1.32769	0.122073	15.0301	11.5939	5.81427	6.31653	5.78732	3.67968	7.42653	4.003
ENSCSAG00000009139	NUP62CL	nucleoporin 62 C-terminal like	1.32629	0.304373	0.897656	1.32629	0.304373	3.24792	1.926	1.32203	0.140433	5.01002	13.5262	8.39839	11.3698	0	2.45312	2.47551	3.33584
ENSCSAG00000011202	NHSL2		1.32514	0.0991352	0.687374	1.32514	0.0991352	1.44746	0.131246	1.32164	0.072003	17.5351	11.5939	12.9206	10.1064	7.23415	3.67968	9.90204	10.6747
ENSCSAG00000004301		ATP binding cassette subfamily G member 2 (Junior blood group)	1.32485	0.221098	0.841999	1.32485	0.221098	2.32192	1	1.31497	0.160876	11.2725	3.86462	11.6285	7.57983	1.44683	2.45312	4.95102	4.67017
ENSCSAG00000000162		ubiquinone biosynthesis protein COQ4 homolog, mitochondrial	1.32466	0.426095	0.943939	2.41542	0.280685	2.16991	0.999988	1.32466	0.426095	5.01002	3.86462	1.29206	1.26331	1.44683	1.22656	0	1.33433
ENSCSAG00000004637	CMTM4		1.3237	0.00117297	0.0713142	1.32436	0.000796004	0.599462	-0.722992	1.3237	0.00117297	50.1002	50.2401	32.9475	49.9006	27.4898	39.2499	65.1884	72.0541
ENSCSAG00000005873	ZNF764		1.32218	0.453474	0.946201	1.32218	0.453474	1.58496	0.263036	1.5573	0.362494	0	5.79693	2.58412	3.15826	1.44683	1.22656	1.65034	2.66867
ENSCSAG00000006552	PLCXD2		1.32071	0.266979	0.874193	1.34137	0.245533	0.736966	-0.58496	1.32071	0.266979	3.75751	5.79693	4.52221	5.05322	1.44683	4.90624	6.60136	8.00601
ENSCSAG00000008832			1.31981	0.639885	0.979372	1.31981	0.639885	1.32192	-0.999993	1.7719	0.488766	5.01002	0	0	0.631653	1.44683	1.22656	0.82517	1.33433
ENSCSAG00000011800	GSAP		1.31877	0.102902	0.692057	1.3101	0.0587052	-1.16992	-2.47573	1.31877	0.102902	12.525	15.4585	5.81427	10.1064	31.8303	30.664	46.2095	43.3659
ENSCSAG00000007302	TMEM139	transmembrane protein 139	1.31614	0.100958	0.689883	1.31614	0.100958	1.66985	0.362571	1.31233	0.0618679	22.5451	11.5939	16.7968	10.1064	8.68098	2.45312	12.3776	9.34034
ENSCSAG00000009559	FRMD5		1.31584	0.249667	0.861777	1.31584	0.249667	1.58496	0.289508	1.31369	0.189981	6.26252	11.5939	4.52221	5.68488	4.34049	2.45312	4.12585	4.67017
ENSCSAG00000014633	LOX	lysyl oxidase	1.31461	0.127408	0.725203	1.31461	0.127408	3.80735	2.49476	1.31355	0.00545325	41.3327	28.9846	34.2396	27.7927	1.44683	3.67968	4.12585	7.33884
ENSCSAG00000015297	KCNH1	potassium voltage-gated channel subfamily H member 1	1.3116	0.537087	0.963887	1.3116	0.537087	1.16992	1.26027e-15	1.33028	0.429292	2.50501	5.79693	0.64603	1.26331	0	3.67968	0.82517	0.667167
ENSCSAG00000005735	VKORC1	vitamin K epoxide reductase complex subunit 1	1.30162	0.000293058	0.0286771	1.30162	0.000293058	1.98351	0.683265	1.30051	1.43544e-05	95.1904	79.2247	87.2141	79.5883	27.4898	17.1719	56.9367	47.3689
ENSCSAG00000003728	PRX		1.30006	0.300227	0.894141	1.27622	0.249416	-1.05889	-2.32192	1.30006	0.300227	6.26252	5.79693	2.58412	3.15826	10.1278	14.7187	16.5034	12.6762
ENSCSAG00000014226	ARID3B	AT-rich interaction domain 3B	1.29935	0.658408	0.980256	1.29935	0.658408	0.999989	-0.736959	1.85408	0.513903	0	1.93231	2.58412	0	1.44683	0	1.65034	3.33584
ENSCSAG00000014360	CREB5	cAMP responsive element binding protein 5	1.29837	0.258711	0.867581	1.29837	0.258711	3.6147	2.32193	1.30025	0.0596661	10.02	38.6462	16.7968	12.6331	4.34049	0	4.12585	2.0015
ENSCSAG00000001295			1.29745	0.412588	0.940681	1.36057	0.383331	1.32192	2.65312e-06	1.29745	0.412588	2.50501	1.93231	3.23015	3.78992	0	2.45312	0.82517	6.00451
ENSCSAG00000010451	KRBA2	KRAB-A domain containing 2	1.2904	0.333917	0.903437	1.2904	0.333917	1.26303	1.86923e-06	1.29104	0.289702	6.26252	5.79693	2.58412	4.42157	2.89366	2.45312	2.47551	5.33734
ENSCSAG00000016631	FST	follistatin	1.28712	0.397048	0.935095	1.56297	0.344214	0.125533	-0.999996	1.28712	0.397048	6.26252	5.79693	1.29206	1.26331	4.34049	7.35937	4.12585	0
ENSCSAG00000000600		peptidyl-prolyl cis-trans isomerase FKBP3	1.28694	0.481047	0.953583	1.28694	0.481047	0.678072	-0.584959	1.50877	0.399349	0	7.72924	1.29206	2.52661	2.89366	2.45312	4.95102	0.667167
ENSCSAG00000008088	SLC37A1	solute carrier family 37 member 1	1.2851	0.2403	0.85417	1.26034	0.209982	-0.452511	-1.70044	1.2851	0.2403	3.75751	15.4585	3.87618	3.78992	14.4683	12.2656	10.7272	14.6777
ENSCSAG00000011610	ERICH6	glutamate rich 6	1.28372	0.46775	0.949749	1.28372	0.46775	0.485427	-0.736962	1.31219	0.444073	2.50501	3.86462	0.64603	1.89496	4.34049	1.22656	1.65034	3.33584
ENSCSAG00000008250	KLHL29		1.28286	0.222026	0.842801	1.28286	0.222026	0.678073	-0.58496	1.28068	0.216776	7.51503	7.72924	4.52221	5.05322	2.89366	7.35937	5.77619	8.67318
ENSCSAG00000007857	SCGN		1.28212	0.467551	0.949749	1.28212	0.467551	1.22239	1.96465e-06	1.27332	0.436377	2.50501	3.86462	1.29206	2.52661	2.89366	0	0.82517	3.33584
ENSCSAG00000000785		TAR DNA binding protein	1.28093	0.206903	0.833197	1.28093	0.206903	0.584963	-0.67807	1.28642	0.20297	10.02	7.72924	3.87618	5.68488	7.23415	4.90624	7.42653	8.67318
ENSCSAG00000019131	GPR85	G protein-coupled receptor 85	1.27784	0.0964238	0.680814	1.27496	0.0652751	-0.38187	-1.65208	1.27784	0.0964238	10.02	23.1877	13.5666	6.94818	14.4683	29.4375	31.3565	35.3599
ENSCSAG00000014654	RP1		1.27707	0.317363	0.902376	1.27707	0.317363	0.378513	-0.874466	1.2989	0.312009	2.50501	9.66155	3.87618	1.89496	2.89366	7.35937	4.12585	6.67167
ENSCSAG00000000504			1.27501	0.240571	0.85418	1.27501	0.240571	1.5025	0.24101	1.27098	0.199426	5.01002	11.5939	7.10633	6.31653	4.34049	2.45312	5.77619	4.67017
ENSCSAG00000012912	NAALADL2		1.27431	0.526773	0.962267	1.27431	0.526773	1.58495	0.321929	1.6574	0.423074	2.50501	0	1.93809	2.52661	1.44683	0	0.82517	2.66867
ENSCSAG00000015353	F2RL2	coagulation factor II thrombin receptor like 2	1.26966	0.388566	0.933163	1.33712	0.387467	2.32191	1	1.26966	0.388566	1.2525	3.86462	6.4603	3.78992	0	1.22656	2.47551	2.66867
ENSCSAG00000004047	RYR1	ryanodine receptor 1	1.2687	0.444746	0.94509	1.2687	0.444746	-0.415035	-1.67807	1.51187	0.397316	0	5.79693	3.23015	1.89496	2.89366	4.90624	6.60136	8.67318
ENSCSAG00000003682	TMEM170A	transmembrane protein 170A	1.2663	0.0327622	0.45515	1.2663	0.0327622	0.968292	-0.292781	1.26191	0.0281036	20.0401	25.12	20.0269	19.5812	15.9151	7.35937	19.8041	29.3554
ENSCSAG00000002816	PTS	6-pyruvoyltetrahydropterin synthase	1.26539	0.0613892	0.587338	1.26539	0.0613892	0.926	-0.332574	1.26404	0.0543713	21.2926	17.3908	14.2127	13.2647	8.68098	11.039	18.9789	14.6777
ENSCSAG00000003983	XRRA1		1.26505	0.508134	0.957906	1.36507	0.403542	0.584961	-0.777604	1.26505	0.508134	1.2525	1.93231	6.4603	0.631653	1.44683	1.22656	7.42653	5.33734
ENSCSAG00000009360	TMEM254	transmembrane protein 254	1.26478	0.00651744	0.207851	1.26478	0.00651744	2.7633	1.5009	1.26224	0.000115027	61.3727	67.6308	80.1078	70.1135	5.78732	13.4922	19.8041	32.6912
ENSCSAG00000007813	SGPP2		1.25733	0.0924478	0.673518	1.25733	0.0924478	2.25634	1	1.25756	0.0398906	13.7776	28.9846	16.7968	22.7395	4.34049	4.90624	9.90204	10.0075
ENSCSAG00000010711	ANKRD24		1.25533	0.491987	0.95412	1.25533	0.491987	-1.09953	-3.32191	1.39268	0.479953	2.50501	3.86462	1.29206	0	10.1278	4.90624	7.42653	3.33584
ENSCSAG00000002935	CYP4V2	cytochrome P450 family 4 subfamily V member 2	1.25479	0.149292	0.767535	1.25479	0.149292	1.68806	0.4361	1.25625	0.1097	7.51503	21.2554	7.75236	15.1597	4.34049	4.90624	9.07687	8.00601
ENSCSAG00000012689	HAAO		1.24449	0.26901	0.874193	1.24449	0.26901	1.09954	-0.125529	1.23503	0.243381	5.01002	9.66155	7.10633	4.42157	5.78732	1.22656	9.07687	2.66867
ENSCSAG00000006460	COL2A1	collagen type II alpha 1 chain	1.23904	0.698103	0.983255	1.23904	0.698103	3.09515	1.79646	1.30974	0.594284	5.01002	88.8863	3.23015	63.1653	5.78732	4.90624	12.3776	6.67167
ENSCSAG00000008581		transmembrane 4 L six family member 19	1.23904	0.263345	0.873006	1.23904	0.263345	1.90689	0.678073	1.226	0.208492	8.76753	5.79693	4.52221	10.7381	2.89366	1.22656	3.30068	7.33884
ENSCSAG00000014152	CISH		1.23897	0.449032	0.945353	1.23897	0.449032	2.80734	1.58496	1.20459	0.376428	5.01002	1.93231	4.52221	3.78992	0	1.22656	2.47551	1.33433
ENSCSAG00000005256	CFAP43	cilia and flagella associated protein 43	1.23835	0.209022	0.835687	1.23835	0.209022	1	-0.222391	1.24235	0.178591	7.51503	13.5262	5.81427	6.31653	4.34049	7.35937	5.77619	8.00601
ENSCSAG00000017149	PLIN1	perilipin 1	1.2358	0.470672	0.950683	1.1727	0.444232	-1.44057	-2.58496	1.2358	0.470672	2.50501	3.86462	1.29206	1.89496	7.23415	12.2656	6.60136	11.3418
ENSCSAG00000014592	CNTN2	contactin 2	1.23541	0.613393	0.978168	1.23541	0.613393	0.58496	-0.584958	1.24249	0.610186	1.2525	1.93231	0.64603	0.631653	1.44683	1.22656	2.47551	0.667167
ENSCSAG00000008825	F12	coagulation factor XII	1.23124	0.0667912	0.598728	1.23124	0.0667912	0.61891	-0.60572	1.23359	0.0617809	17.5351	25.12	12.2746	10.7381	15.9151	12.2656	19.8041	15.3448
ENSCSAG00000018647		D-dopachrome decarboxylase	1.22917	0.00214822	0.107342	1.22917	0.00214822	1.81214	0.584963	1.22798	0.000215617	70.1403	81.157	55.5586	72.6401	17.362	25.7578	55.2864	30.6897
ENSCSAG00000007906	PRSS58	serine protease 58	1.22576	0.444135	0.94509	1.26251	0.393675	0.736965	-0.51457	1.22576	0.444135	2.50501	1.93231	1.93809	5.05322	1.44683	2.45312	4.12585	6.00451
ENSCSAG00000016108	ELMOD3		1.22113	0.0585494	0.576709	1.22076	0.0452966	0.112475	-1.10309	1.22113	0.0585494	21.2926	19.3231	13.5666	12.6331	14.4683	23.3047	27.2306	30.6897
ENSCSAG00000013439	PCBD2	pterin-4 alpha-carbinolamine dehydratase 2	1.2197	0.00804435	0.23752	1.2197	0.00804435	1.54934	0.331206	1.22065	0.00261641	45.0902	75.3601	37.4698	41.0574	24.5961	15.9453	28.0558	34.0255
ENSCSAG00000019607			1.21711	0.00193523	0.101195	1.21642	0.00144393	0.224318	-0.989193	1.21711	0.00193523	62.6252	61.8339	29.7174	36.6359	49.1922	57.6484	68.4891	65.3824
ENSCSAG00000008743	ALDH3B2		1.21676	0.426486	0.943939	1.21676	0.426486	3.32191	2.11547	1.19563	0.287494	6.26252	3.86462	4.52221	8.21149	1.44683	0	2.47551	1.33433
ENSCSAG00000019487	UFSP1	UFM1 specific peptidase 1 (inactive)	1.21234	0.152606	0.76912	1.21234	0.152606	1.89308	0.688057	1.20398	0.0951126	16.2826	9.66155	14.2127	14.528	5.78732	1.22656	11.5524	6.00451
ENSCSAG00000002112	BGLAP	bone gamma-carboxyglutamate protein	1.21156	0.483448	0.953583	1.70579	0.366348	1.58496	0.415037	1.21156	0.483448	3.75751	1.93231	1.29206	2.52661	0	2.45312	3.30068	0
ENSCSAG00000015530	PROX1	prospero homeobox 1	1.21131	0.350028	0.914875	1.21131	0.350028	2.32193	1.1375	1.20326	0.206356	10.02	9.66155	5.16824	6.31653	2.89366	1.22656	1.65034	2.66867
ENSCSAG00000014433	PLEKHG1	pleckstrin homology and RhoGEF domain containing G1	1.20997	0.172588	0.791838	1.20997	0.172588	1.66985	0.469486	1.2131	0.0982353	16.2826	19.3231	8.39839	10.1064	5.78732	4.90624	5.77619	7.33884
ENSCSAG00000003563	GCSH	glycine cleavage system protein H	1.20994	0.00977537	0.260016	1.21049	0.00590222	0.195257	-1.01238	1.20994	0.00977537	31.3126	48.3077	30.3634	27.7927	37.6176	30.664	62.7129	54.0406
ENSCSAG00000009819	NRTN	neurturin	1.20838	0.400009	0.937184	1.16712	0.339811	-2.37851	-3.53605	1.20838	0.400009	7.51503	1.93231	2.58412	1.89496	27.4898	24.5312	37.1327	20.6822
ENSCSAG00000015412	BATF3		1.20536	0.226836	0.846178	1.2111	0.219459	0.502501	-0.691876	1.20536	0.226836	5.01002	11.5939	4.52221	8.21149	10.1278	2.45312	14.8531	6.00451
ENSCSAG00000011282	DERL3	derlin 3	1.20462	0.167277	0.788721	1.20462	0.167277	2.25634	1.05889	1.20526	0.0641454	17.5351	25.12	13.5666	11.3698	4.34049	4.90624	4.95102	6.67167
ENSCSAG00000007524	PHACTR1		1.20428	0.654981	0.980203	1.20428	0.654981	0.584959	-0.584958	1.70669	0.511372	2.50501	0	1.29206	1.26331	1.44683	1.22656	1.65034	1.33433
ENSCSAG00000019112	FOXC1	forkhead box C1	1.20132	0.0734306	0.61737	1.20132	0.0734306	1.64386	0.450662	1.19474	0.0351298	31.3126	19.3231	20.0269	20.8445	11.5746	3.67968	21.4544	9.34034
ENSCSAG00000009814	ARMCX2		1.20061	0.331281	0.902919	1.20061	0.331281	2	0.807356	1.18538	0.284276	10.02	1.93231	5.81427	8.21149	1.44683	2.45312	3.30068	5.33734
ENSCSAG00000000741	ESPN		1.19788	0.474939	0.952082	1.19788	0.474939	2.16992	0.999998	1.1985	0.382662	5.01002	3.86462	3.23015	3.15826	1.44683	1.22656	2.47551	1.33433
ENSCSAG00000001966	PMVK	phosphomevalonate kinase	1.19688	0.0194147	0.367305	1.19688	0.0194147	1.75002	0.555216	1.19521	0.00674875	38.8276	34.7816	33.5936	37.8992	8.68098	13.4922	28.0558	20.6822
ENSCSAG00000010515	NTN3		1.19549	0.464612	0.949749	1.19549	0.464612	1.1375	1.54166e-06	1.20888	0.392109	5.01002	5.79693	3.23015	0.631653	4.34049	1.22656	3.30068	0.667167
ENSCSAG00000003105	NOVA2		1.19534	0.114648	0.712485	1.19534	0.114648	2.35755	1.16993	1.18585	0.0401752	17.5351	23.1877	19.3809	25.8978	1.44683	7.35937	10.7272	9.34034
ENSCSAG00000010654	RGL4		1.19434	0.551937	0.965405	1.2956	0.497891	1.58495	0.321929	1.19434	0.551937	1.2525	1.93231	2.58412	1.89496	0	1.22656	1.65034	2.0015
ENSCSAG00000010700		sperm-associated antigen 7-like	1.19434	0.551937	0.965405	1.2956	0.497891	1.58495	0.321929	1.19434	0.551937	1.2525	1.93231	1.93809	2.52661	0	1.22656	1.65034	2.0015
ENSCSAG00000000057	DPM3		1.19073	7.93303e-05	0.0106423	1.19073	7.93303e-05	2.5943	1.40462	1.19016	9.58656e-09	211.673	253.133	190.579	177.494	49.1922	28.2109	85.8177	52.7062
ENSCSAG00000007988		alpha-crystallin A chain	1.19007	0.510706	0.957906	1.19007	0.510706	1.99999	0.807354	1.48745	0.406915	3.75751	0	1.93809	5.05322	1.44683	0	1.65034	2.0015
ENSCSAG00000000451	HRCT1		1.18899	0.101012	0.689883	1.18899	0.101012	2.38466	1.20163	1.18297	0.0318151	23.7976	23.1877	25.8412	19.5812	4.34049	4.90624	13.2027	7.33884
ENSCSAG00000008595	CREBL2	cAMP responsive element binding protein like 2	1.18851	0.191137	0.811913	1.18614	0.157388	9.00132e-07	-1.18057	1.18851	0.191137	6.26252	15.4585	7.10633	7.57983	10.1278	11.039	14.8531	18.6807
ENSCSAG00000014795	MEIS1	Meis homeobox 1	1.1884	0.162927	0.783645	1.1884	0.162927	2.12928	0.947533	1.18493	0.0762691	17.5351	17.3908	13.5666	13.2647	4.34049	3.67968	4.95102	9.34034
ENSCSAG00000015933	CYTIP		1.18795	0.342249	0.91035	1.16955	0.317325	-0.206449	-1.36257	1.18795	0.342249	2.50501	9.66155	1.93809	5.05322	5.78732	8.58593	9.07687	9.34034
ENSCSAG00000018328	TENM1		1.18768	0.508001	0.957906	1.18768	0.508001	2.73696	1.58496	1.20711	0.280657	5.01002	15.4585	2.58412	3.15826	1.44683	2.45312	0.82517	1.33433
ENSCSAG00000000133			1.18755	0.116676	0.715426	1.18755	0.116676	1.62803	0.44746	1.18199	0.0753133	20.0401	13.5262	15.5047	13.8964	4.34049	7.35937	9.07687	12.6762
ENSCSAG00000010227	TMEM211	transmembrane protein 211	1.18641	0.325968	0.902919	1.18641	0.325968	2.37851	1.22239	1.17123	0.167984	13.7776	11.5939	9.04442	5.05322	0	4.90624	4.12585	2.0015
ENSCSAG00000019292	EIF2S3B		1.18627	0.0287416	0.43207	1.18585	0.0187032	-0.024247	-1.20645	1.18627	0.0287416	33.8176	25.12	20.673	18.3179	26.0429	34.3437	43.734	46.0345
ENSCSAG00000012143			1.18496	0.375273	0.928563	1.16349	0.363035	-0.241006	-1.37851	1.18496	0.375273	5.01002	5.79693	2.58412	1.89496	8.68098	3.67968	8.2517	4.67017
ENSCSAG00000015769	SS18L1		1.18259	0.196473	0.818935	1.19917	0.176701	1	-0.192643	1.18259	0.196473	7.51503	5.79693	7.75236	12.6331	2.89366	3.67968	7.42653	17.3464
ENSCSAG00000014082	RAB36		1.18151	0.12769	0.725303	1.18151	0.12769	1.04439	-0.12553	1.17702	0.101114	17.5351	15.4585	12.9206	9.47479	5.78732	9.81249	17.3286	7.33884
ENSCSAG00000001132	HPCAL4		1.17928	0.146945	0.765878	1.17928	0.146945	2.08746	0.912538	1.17596	0.0822766	11.2725	23.1877	13.5666	17.6863	4.34049	3.67968	8.2517	9.34034
ENSCSAG00000018529	SDHAF1	succinate dehydrogenase complex assembly factor 1	1.17814	0.105117	0.694501	1.17814	0.105117	2.84435	1.67243	1.17545	0.0120067	37.5751	40.5785	23.9031	26.5294	7.23415	3.67968	7.42653	9.34034
ENSCSAG00000016759	TMEM267	transmembrane protein 267	1.17762	0.2197	0.841459	1.17762	0.2197	1.926	0.758993	1.16459	0.159054	8.76753	9.66155	11.6285	10.1064	2.89366	2.45312	4.12585	9.34034
ENSCSAG00000009307	SH3GL2		1.17576	0.163245	0.783933	1.17576	0.163245	1.58496	0.415039	1.17253	0.122794	10.02	17.3908	9.04442	15.1597	4.34049	4.90624	9.90204	8.00601
ENSCSAG00000005245	DNAJC24	DnaJ heat shock protein family (Hsp40) member C24	1.17512	0.0667102	0.598728	1.17512	0.0667102	1.24793	0.0780035	1.17028	0.0531111	18.7876	19.3231	20.0269	17.6863	7.23415	8.58593	14.8531	21.3494
ENSCSAG00000005749	ING5	inhibitor of growth family member 5	1.17507	0.0670276	0.598728	1.17507	0.0670276	1.44057	0.27009	1.16941	0.0492131	18.7876	19.3231	21.965	18.9496	7.23415	7.35937	17.3286	16.6792
ENSCSAG00000007075	FAM120AOS		1.17502	0.396884	0.93508	1.15324	0.384952	-0.137502	-1.26303	1.17502	0.396884	3.75751	5.79693	1.93809	2.52661	4.34049	7.35937	4.95102	7.33884
ENSCSAG00000015171	DMAC2L		1.17444	0.0881791	0.665843	1.17444	0.0881791	1.89812	0.725826	1.17131	0.0472699	20.0401	21.2554	16.1508	27.1611	4.34049	7.35937	14.8531	11.3418
ENSCSAG00000016604	ZNF35	zinc finger protein 35	1.17429	0.0446069	0.512317	1.17429	0.0446069	1.31034	0.140863	1.1725	0.0258635	31.3126	30.917	17.4428	25.8978	8.68098	15.9453	20.6293	18.0135
ENSCSAG00000015509	DGUOK	deoxyguanosine kinase	1.17292	0.003364	0.145679	1.17292	0.003364	2.00856	0.837271	1.17196	0.000303569	70.1403	98.5478	65.8951	67.5869	18.8088	23.3047	43.734	30.6897
ENSCSAG00000007167	CYS1	cystin 1	1.16912	0.199945	0.822302	1.16912	0.199945	1.078	-0.0824606	1.16362	0.18485	8.76753	9.66155	8.39839	8.84314	4.34049	4.90624	12.3776	6.00451
ENSCSAG00000012839	PPP1R3F	protein phosphatase 1 regulatory subunit 3F	1.16888	0.379589	0.93028	1.17551	0.337153	-0.289505	-1.44057	1.16888	0.379589	5.01002	3.86462	3.23015	3.78992	5.78732	4.90624	15.6782	3.33584
ENSCSAG00000011254	EHD3	EH domain containing 3	1.16613	0.0331114	0.457116	1.16613	0.0331114	1.62803	0.465664	1.16377	0.0142233	35.0701	32.8493	26.4872	31.5826	13.0215	8.58593	18.9789	22.6837
ENSCSAG00000013814	OVCA2	OVCA2 serine hydrolase domain containing	1.166	0.0235298	0.397814	1.16478	0.0199713	0.289507	-0.871266	1.166	0.0235298	32.5651	32.8493	21.965	18.9496	23.1493	30.664	39.6082	34.6927
ENSCSAG00000003525	TMEM91	transmembrane protein 91	1.16536	0.255406	0.865542	1.16536	0.255406	1.152	1.54026e-06	1.16685	0.214315	7.51503	11.5939	5.81427	5.68488	4.34049	4.90624	7.42653	5.33734
ENSCSAG00000006651	SLC35A5		1.16514	0.024241	0.4043	1.16514	0.024241	1.44746	0.28473	1.16239	0.0151703	35.0701	25.12	32.3015	35.3726	13.0215	8.58593	23.9299	30.6897
ENSCSAG00000005427		nuclear factor, erythroid 2	1.16453	0.435096	0.944191	1.16453	0.435096	2.32192	1.16992	1.1595	0.347418	6.26252	3.86462	6.4603	2.52661	1.44683	1.22656	2.47551	2.0015
ENSCSAG00000015930	ACVR1C	activin A receptor type 1C	1.15702	0.354975	0.918277	1.14805	0.328915	0.137505	-0.999997	1.15702	0.354975	2.50501	7.72924	5.16824	2.52661	5.78732	3.67968	7.42653	8.67318
ENSCSAG00000017931	KIAA1328		1.1531	0.167304	0.788721	1.1531	0.167304	0.770519	-0.371967	1.15523	0.14845	18.7876	9.66155	8.39839	9.47479	4.34049	13.4922	9.90204	12.009
ENSCSAG00000017895	DTNA	dystrobrevin alpha	1.15161	0.066996	0.598728	1.15161	0.066996	1.66742	0.519375	1.14972	0.0326258	25.0501	28.9846	20.0269	23.3712	7.23415	9.81249	14.8531	14.6777
ENSCSAG00000015777	RSPH4A	radial spoke head component 4A	1.15007	0.430161	0.943939	1.15007	0.430161	3.80733	2.66296	1.13395	0.234391	3.75751	9.66155	7.75236	10.7381	0	1.22656	1.65034	1.33433
ENSCSAG00000013026	GZMM		1.14889	0.392965	0.933163	1.14889	0.392965	1.32193	0.192647	1.14456	0.36152	3.75751	5.79693	3.87618	4.42157	2.89366	1.22656	4.12585	2.66867
ENSCSAG00000012969	SPEF1	sperm flagellar 1	1.14738	0.301571	0.894924	1.14738	0.301571	1.45943	0.32193	1.12558	0.293883	2.50501	7.72924	7.10633	8.21149	2.89366	1.22656	6.60136	5.33734
ENSCSAG00000007441			1.14644	0.390779	0.933163	1.14644	0.390779	0.893085	-0.22239	1.15714	0.347218	5.01002	7.72924	3.23015	2.52661	2.89366	3.67968	4.12585	3.33584
ENSCSAG00000007277	CISD1	CDGSH iron sulfur domain 1	1.1459	0.04757	0.5267	1.1459	0.04757	3.36075	2.21501	1.1456	0.00125225	48.8477	63.7662	71.0633	59.3754	4.34049	7.35937	10.7272	17.3464
[truncated: 11,872 more rows]

## Sheet: GO_TS_up
Category	Term	Fold Enrichment	PValue	Count	%	Genes	List Total	Pop Hits	Pop Total	Bonferroni	Benjamini	FDR
[truncated: 4 more rows]

[truncated: 3 more sheets: GO_TS_down, GO_TE_up, GO_TE_down]
