# Supplementary material for: Ribosome profiling of porcine reproductive and respiratory syndrome virus reveals novel features of viral gene expression
Source: bioRxiv preprint, doi:10.1101/2021.11.17.468997, version 1 (2021-11-19)
Supplement: Supplementary Table 11 [file 468997_file14.xlsx]

## Sheet: TS_up
Gene_ID	external_gene_name	wikigene_description	baseMean	log2FoldChange	lfcSE	stat	pvalue	padj	p_final	p_adj_final	noCHX_RNA_12hpi_KO2_1	noCHX_RNA_12hpi_KO2_2	noCHX_RNA_12hpi_WT_1	noCHX_RNA_12hpi_WT_2
ENSCSAG00000001782	TXNIP	thioredoxin interacting protein	880.319	0.786605	0.115972	6.79447	1.08708e-11	1.89913e-08	2.22045e-16	2.10284e-13	1132.81	1363.24	444.544	580.679

## Sheet: TS_down
Gene_ID	external_gene_name	wikigene_description	baseMean	log2FoldChange	lfcSE	stat	pvalue	padj	p_final	p_adj_final	noCHX_RNA_12hpi_KO2_1	noCHX_RNA_12hpi_KO2_2	noCHX_RNA_12hpi_WT_1	noCHX_RNA_12hpi_WT_2
ENSCSAG00000009591	DUSP1	dual specificity phosphatase 1	2569.67	-1.31852	0.10766	-12.2665	1.37085e-34	1.67641e-30	2.22045e-16	2.10284e-13	1096.78	1132.56	4233.17	3816.17
ENSCSAG00000005822	NR4A1	nuclear receptor subfamily 4 group A member 1	78.7025	-0.950969	0.113477	-8.40356	4.33161e-17	2.64856e-13	2.22045e-16	2.10284e-13	13.776	16.4768	151.145	133.412
ENSCSAG00000008869	HES1	hes family bHLH transcription factor 1	1139.47	-0.824108	0.109282	-7.54307	4.59045e-14	1.87122e-10	2.22045e-16	2.10284e-13	688.8	706.769	1595.91	1566.39
ENSCSAG00000006329	DNAJB1	DnaJ heat shock protein family (Hsp40) member B1	419.632	-0.822538	0.115548	-7.11816	1.09375e-12	2.67508e-09	2.22045e-16	2.10284e-13	240.55	237.613	616.805	583.559
ENSCSAG00000018011	SERPINE1	serpin family E member 1	2339.62	-0.800477	0.10738	-7.45879	8.73183e-14	2.66954e-10	2.22045e-16	2.10284e-13	1404.09	1547.95	3221.83	3184.62
ENSCSAG00000000149	JUN	Jun proto-oncogene, AP-1 transcription factor subunit	644.693	-0.797373	0.115456	-6.91635	4.63439e-12	9.44565e-09	2.22045e-16	2.10284e-13	393.146	358.154	1013.56	813.911
ENSCSAG00000015405	ATF3		97.3674	-0.770659	0.116513	-6.6671	2.60907e-11	3.98829e-08	2.22045e-16	2.10284e-13	40.2683	34.6881	166.704	147.809
ENSCSAG00000005364	GDF15	growth differentiation factor 15	544.487	-0.759817	0.117306	-6.49383	8.36806e-11	1.13703e-07	2.22045e-16	2.10284e-13	347.579	282.708	869.083	678.579

## Sheet: TS_full
gene_ID	external_gene_name	wikigene_description	baseMean	log2FoldChange	lfcSE	stat	pvalue	padj	p_final	p_adj_final	noCHX_RNA_12hpi_KO2_1	noCHX_RNA_12hpi_KO2_2	noCHX_RNA_12hpi_WT_1	noCHX_RNA_12hpi_WT_2
ENSCSAG00000001782	TXNIP	thioredoxin interacting protein	880.319	0.786605	0.115972	6.79447	1.08708e-11	1.89913e-08	2.22045e-16	2.10284e-13	1132.81	1363.24	444.544	580.679
ENSCSAG00000007337	BMF	Bcl2 modifying factor	414.834	0.383664	0.116009	3.30782	0.000940254	0.280448	9.55027e-07	0.000286644	533.025	473.492	338.965	313.855
ENSCSAG00000004937		sulfotransferase family 1E member 1	401.989	0.330548	0.117257	2.81853	0.00482444	0.983302	2.9697e-05	0.00599948	438.713	519.454	295.622	354.166
ENSCSAG00000001524	VAV3	vav guanine nucleotide exchange factor 3	538.527	0.319826	0.117611	2.7195	0.00653808	0.99969	5.59997e-05	0.0104799	557.398	722.379	386.753	487.579
ENSCSAG00000014681	ARRDC3	arrestin domain containing 3	517.653	0.31615	0.11711	2.69946	0.00694515	0.99969	6.35093e-05	0.0116702	558.458	666.011	370.083	476.061
ENSCSAG00000008347	TRPM3		317.843	0.307141	0.118569	2.59	0.00959747	0.99969	0.00012444	0.0199404	331.684	424.929	234.497	280.262
ENSCSAG00000012489	PKDCC	protein kinase domain containing, cytoplasmic	162.397	0.305334	0.119227	2.56249	0.0103925	0.99969	0.000146786	0.0224668	194.983	198.589	138.92	117.096
ENSCSAG00000014952	NREP	neuronal regeneration related protein	407.461	0.30078	0.118465	2.53893	0.0111192	0.99969	0.000168869	0.0247503	439.772	526.391	277.84	385.84
ENSCSAG00000013041	SRSF5	serine and arginine rich splicing factor 5	125.473	0.283692	0.118699	2.39058	0.0168216	0.99969	0.000397468	0.0500887	151.536	153.495	92.2428	104.618
ENSCSAG00000004531	OAT	ornithine aminotransferase	414.978	0.277021	0.115739	2.39301	0.016711	0.99969	0.000392096	0.049575	458.847	498.641	336.742	365.684
ENSCSAG00000006147	NOTCH3		141.853	0.273311	0.118743	2.30521	0.021155	0.99969	0.000637193	0.0718593	189.685	152.627	123.361	101.739
ENSCSAG00000017347	ADAMTS16		702.732	0.269844	0.116332	2.31955	0.0203653	0.99969	0.000589244	0.067722	773.575	846.388	505.669	685.297
ENSCSAG00000001373	LRRC7		171.303	0.264518	0.117566	2.25134	0.0243638	0.99969	0.000851556	0.0887106	178.028	239.348	98.911	168.925
ENSCSAG00000008233	LARGE1	LARGE xylosyl- and glucuronyltransferase 1	110.345	0.255259	0.118135	2.16161	0.0306484	0.99969	0.0013623	0.122736	129.282	136.151	86.686	89.2614
ENSCSAG00000000255	ZBED6	zinc finger BED-type containing 6	139.373	0.254962	0.119073	2.14134	0.0322468	0.99969	0.00151138	0.13264	162.133	168.237	110.025	117.096
ENSCSAG00000017882	KLHL14	kelch like family member 14	105.466	0.252989	0.117827	2.14851	0.0316732	0.99969	0.00145699	0.128998	130.342	124.01	81.1293	86.382
ENSCSAG00000011297	ABCA1	ATP binding cassette subfamily A member 1	162.1	0.247027	0.119216	2.07358	0.0381182	0.99969	0.00212555	0.169736	204.521	176.042	141.143	126.694
ENSCSAG00000006125	HNF1B	HNF1 homeobox B	509.614	0.245224	0.118405	2.07092	0.0383666	0.99969	0.00215383	0.171284	515.01	658.206	362.303	502.935
ENSCSAG00000010811	CTTNBP2	cortactin binding protein 2	117.876	0.243629	0.117963	2.06532	0.0388927	0.99969	0.00221436	0.174555	123.984	157.831	88.9088	100.779
ENSCSAG00000014959	STARD4	StAR related lipid transfer domain containing 4	84.7933	0.238212	0.115509	2.06677	0.0387562	0.99969	0.00219857	0.173707	110.208	96.2593	72.2384	60.4674
ENSCSAG00000003618	CTSC	cathepsin C	138.479	0.237059	0.117863	2.01108	0.0443174	0.99969	0.00288717	0.210633	141.999	188.183	92.2428	131.493
ENSCSAG00000013231	BRD8		175.062	0.227295	0.119238	1.90608	0.0566394	0.99969	0.00474358	0.289466	186.506	217.668	151.145	144.93
ENSCSAG00000007500	DNAJC12	DnaJ heat shock protein family (Hsp40) member C12	89.8033	0.225991	0.1164	1.94257	0.0520676	0.99969	0.00400189	0.261279	100.671	114.471	71.127	72.9448
ENSCSAG00000013632			119.444	0.225886	0.118296	1.90938	0.0562134	0.99969	0.00467185	0.286902	136.7	144.823	87.7974	108.457
ENSCSAG00000011395	HBP1		97.1481	0.225596	0.117242	1.92513	0.0542134	0.99969	0.00434227	0.274688	112.327	118.807	77.7952	79.6634
ENSCSAG00000003436	ANO4	anoctamin 4	108.33	0.223288	0.117975	1.89298	0.05836	0.99969	0.00503882	0.299687	122.924	132.682	85.5747	92.1408
ENSCSAG00000017268	EPHA7		377.897	0.221502	0.119242	1.85757	0.0632299	0.99969	0.00592185	0.329894	382.549	489.102	244.499	395.438
ENSCSAG00000008003	ZSCAN26		56.0357	0.218546	0.108854	2.01402	0.0440078	0.99969	0.0028464	0.208554	60.4025	79.7825	45.5657	38.392
ENSCSAG00000010039	IDH1	isocitrate dehydrogenase (NADP(+)) 1	99.5272	0.217434	0.116807	1.86365	0.0623705	0.99969	0.00576095	0.324678	110.208	125.744	91.1315	71.0252
ENSCSAG00000012240	PPP2R2B		34.2118	0.216807	0.0986825	2.21492	0.0267655	0.99969	0.00103254	0.101868	40.2683	51.1649	23.3386	22.0754
ENSCSAG00000005554	IGFBP6	insulin like growth factor binding protein 6	114.668	0.216483	0.117571	1.84455	0.0651028	0.99969	0.00628009	0.341946	146.238	124.01	107.802	80.6232
ENSCSAG00000004998	FOXJ1	forkhead box J1	116.576	0.215945	0.117514	1.84008	0.0657558	0.99969	0.0064074	0.346099	160.014	115.338	91.1315	99.8192
ENSCSAG00000016171	MAT2A	methionine adenosyltransferase 2A	111.765	0.213389	0.117335	1.81931	0.0688639	0.99969	0.00703057	0.365509	111.268	151.76	96.6883	87.3418
ENSCSAG00000010403	ING4	inhibitor of growth family member 4	68.1164	0.211783	0.112183	1.89316	0.058336	0.99969	0.00503463	0.299545	95.3723	71.1105	52.2339	53.7488
ENSCSAG00000017526	DZIP1		175.534	0.21162	0.119232	1.77436	0.0760039	0.99969	0.00856885	0.407715	191.804	209.863	141.143	159.327
ENSCSAG00000004053	DNAJB13		161.578	0.20967	0.119237	1.7583	0.0786965	0.99969	0.00918739	0.422735	187.566	182.979	128.918	146.849
ENSCSAG00000006639		zinc finger protein 490	26.1505	0.207477	0.0916075	2.29527	0.0217175	0.99969	0.000672501	0.0748078	39.2086	33.8208	13.3363	18.2362
ENSCSAG00000007398	FGD4		77.4296	0.207195	0.114141	1.81602	0.0693666	0.99969	0.007134	0.368591	82.656	103.197	56.6793	67.186
ENSCSAG00000006536	EXOC6	exocyst complex component 6	86.9042	0.206838	0.115752	1.78723	0.0739007	0.99969	0.00810031	0.395637	95.3723	111.002	64.4589	76.784
ENSCSAG00000008305	CEMIP2	cell migration inducing hyaluronidase 2	359.377	0.206376	0.117493	1.75617	0.0790589	0.99969	0.00927224	0.424718	358.176	447.476	318.96	312.895
ENSCSAG00000008810	PAK3	p21 (RAC1) activated kinase 3	25.4084	0.205207	0.0914478	2.27488	0.022913	0.99969	0.000750747	0.0810643	36.0295	34.6881	15.559	15.3568
ENSCSAG00000017982	MTIF3	mitochondrial translational initiation factor 3	29.414	0.20442	0.0948167	2.17836	0.0293796	0.99969	0.0012495	0.116018	43.4474	36.4225	16.6704	21.1156
ENSCSAG00000008587	CDKN1B	cyclin dependent kinase inhibitor 1B	97.4852	0.203868	0.117286	1.73886	0.0820593	0.99969	0.00998924	0.440792	111.268	117.072	80.0179	81.583
ENSCSAG00000006974	ZNF484		122.833	0.203316	0.118449	1.71639	0.0860903	0.99969	0.0109932	0.461417	128.223	156.096	103.356	103.658
ENSCSAG00000004744	NDRG4	NDRG family member 4	112.393	0.202542	0.117771	1.72214	0.0850433	0.99969	0.010728	0.456167	144.118	117.939	101.134	86.382
ENSCSAG00000018153	RHBDD2	rhomboid domain containing 2	95.9535	0.200333	0.117038	1.71297	0.0867175	0.99969	0.0111536	0.464527	109.148	115.338	84.4633	74.8644
ENSCSAG00000004573	SCN1B	sodium voltage-gated channel beta subunit 1	97.4759	0.199954	0.117001	1.71093	0.0870943	0.99969	0.0112505	0.466383	114.447	113.603	88.9088	72.9448
ENSCSAG00000012767	PLD1	phospholipase D1	107.901	0.199614	0.117538	1.69794	0.0895185	0.99969	0.0118837	0.478338	114.447	137.018	82.2406	97.8996
ENSCSAG00000014297	HOXA9	homeobox A9	146.849	0.199501	0.118473	1.68366	0.0922473	0.99969	0.0126163	0.493281	170.61	169.104	98.911	148.769
ENSCSAG00000004333	AFF1	AF4/FMR2 family member 1	97.1586	0.199342	0.117044	1.70338	0.0884976	0.99969	0.011615	0.47321	104.91	122.275	78.9065	82.5428
ENSCSAG00000007933	KCNJ8	potassium inwardly rectifying channel subfamily J member 8	533.122	0.199254	0.116008	1.71721	0.0859413	0.99969	0.0109553	0.460675	533.025	652.135	443.432	503.895
ENSCSAG00000007928	BTN2A1	butyrophilin subfamily 2 member A2	110.694	0.197039	0.115748	1.70372	0.0884325	0.99969	0.011598	0.472896	146.238	115.338	68.9043	112.297
ENSCSAG00000017879	GAREM1	GRB2 associated regulator of MAPK1 subtype 1	451.446	0.196531	0.116857	1.68138	0.0926892	0.99969	0.0127369	0.49566	447.19	557.61	376.751	424.232
ENSCSAG00000014961	THAP1	THAP domain containing 1	30.6091	0.196373	0.0961764	2.05809	0.0395812	0.99969	0.00229484	0.178815	37.0892	44.2273	20.0045	21.1156
ENSCSAG00000014438	SMS	spermine synthase	596.812	0.196183	0.113017	1.73584	0.0825927	0.99969	0.0101194	0.443585	673.964	642.596	524.562	546.126
ENSCSAG00000014982	RASGRF2	Ras protein specific guanine nucleotide releasing factor 2	41.6928	0.195229	0.103177	1.90109	0.0572903	0.99969	0.00485424	0.293358	46.6265	58.9697	33.3408	27.8342
ENSCSAG00000018708	NRIP1	nuclear receptor interacting protein 1	327.583	0.195049	0.117112	1.66513	0.0958878	0.99969	0.0136266	0.512537	343.34	385.905	284.508	296.578
ENSCSAG00000007742	GPRC5B	G protein-coupled receptor class C group 5 member B	113.198	0.194953	0.118275	1.64902	0.0991433	0.99969	0.0145617	0.529099	135.641	125.744	94.4656	96.9398
ENSCSAG00000017522	PIEZO2		605.863	0.194526	0.112862	1.72346	0.0848053	0.99969	0.0106681	0.454963	649.591	685.089	544.566	544.207
ENSCSAG00000013150	SMTNL2	smoothelin like 2	142.122	0.194344	0.119081	1.63286	0.102497	0.99969	0.0155562	0.545523	167.431	156.963	128.918	115.176
ENSCSAG00000016180	MAP3K1	mitogen-activated protein kinase kinase kinase 1	1303.95	0.194073	0.114075	1.70118	0.0889099	0.99969	0.0117231	0.475191	1310.84	1567.9	1041.34	1295.73
ENSCSAG00000003680	MAP3K14	mitogen-activated protein kinase kinase kinase 14	60.9332	0.193508	0.111041	1.74556	0.0808882	0.99969	0.00970629	0.434592	77.3575	70.2433	43.343	52.789
ENSCSAG00000014920	DCP2	decapping mRNA 2	97.0811	0.192972	0.117096	1.6489	0.0991689	0.99969	0.0145692	0.529227	118.686	107.533	76.6838	85.4222
ENSCSAG00000006376	APOBEC3G		175.14	0.191955	0.11924	1.60921	0.107571	0.99969	0.0171204	0.569155	179.088	217.668	144.477	159.327
ENSCSAG00000016922	PTGER4	prostaglandin E receptor 4	65.8531	0.190706	0.112579	1.69574	0.0899352	0.99969	0.0119942	0.480649	74.1785	83.2513	52.2339	53.7488
ENSCSAG00000007997	ZKSCAN8	zinc finger protein with KRAB and SCAN domains 8	34.6214	0.190653	0.0988257	1.94469	0.0518118	0.99969	0.00396222	0.25966	50.8652	39.0241	25.5613	23.0352
ENSCSAG00000002406	GRAMD1B	GRAM domain containing 1B	106.142	0.190606	0.117706	1.62097	0.105025	0.99969	0.0163264	0.557473	129.282	116.205	95.5769	83.5026
ENSCSAG00000010171	CAPN7	calpain 7	139.553	0.190392	0.11899	1.60009	0.109579	0.99969	0.0177591	0.578112	164.252	154.362	110.025	129.573
ENSCSAG00000008069	PDE3A		38.8368	0.189321	0.102069	1.86376	0.0623559	0.99969	0.00575823	0.324589	45.5668	52.8993	30.0067	26.8744
ENSCSAG00000003781	KITLG	KIT ligand	476.573	0.188951	0.118071	1.5999	0.109621	0.99969	0.0177724	0.578295	472.623	589.697	361.192	482.78
ENSCSAG00000016107	MRGBP	MRG domain binding protein	80.2273	0.187899	0.113849	1.65402	0.0981231	0.99969	0.0142654	0.523975	112.327	78.0481	63.3475	67.186
ENSCSAG00000004273	PHLPP2	PH domain and leucine rich repeat protein phosphatase 2	134.691	0.187375	0.118695	1.57832	0.114492	0.99969	0.0193689	0.599121	154.715	153.495	100.022	130.533
ENSCSAG00000015552			140.511	0.187111	0.11856	1.57756	0.114666	0.99969	0.0194272	0.599843	153.655	168.237	100.022	140.131
ENSCSAG00000005297	RPGRIP1L		58.9847	0.186175	0.108964	1.71136	0.0870146	0.99969	0.01123	0.465991	75.2381	68.5089	35.5635	56.6282
ENSCSAG00000013465	ZFHX4	zinc finger homeobox 4	227.818	0.18608	0.118882	1.56471	0.117651	0.99969	0.0204391	0.611966	233.132	276.637	192.265	209.236
ENSCSAG00000014610	DSTYK	dual serine/threonine and tyrosine protein kinase	41.3888	0.185978	0.103748	1.7998	0.0718926	0.99969	0.00766496	0.383827	49.8055	53.7665	32.2294	29.7538
ENSCSAG00000005485	LUC7L3	LUC7 like 3 pre-mRNA splicing factor	100.783	0.18568	0.117262	1.58378	0.113244	0.99969	0.0189536	0.593904	119.745	113.603	76.6838	93.1006
ENSCSAG00000003219	MMP7	matrix metallopeptidase 7	430.779	0.185623	0.115927	1.60084	0.109412	0.99969	0.0177056	0.577377	452.489	498.641	361.192	410.795
ENSCSAG00000004710	SUMO2	small ubiquitin like modifier 2	153.627	0.185219	0.119008	1.5557	0.11978	0.99969	0.0211756	0.620338	166.372	182.979	114.47	150.689
ENSCSAG00000004174	KCNMB4	potassium calcium-activated channel subfamily M regulatory beta subunit 4	148.743	0.184614	0.119193	1.5491	0.121357	0.99969	0.0217293	0.626399	172.73	163.901	127.806	130.533
ENSCSAG00000009503	PACS2		117.543	0.183833	0.118459	1.55248	0.120548	0.99969	0.0214444	0.623305	132.462	136.151	105.579	95.98
ENSCSAG00000004790	EMX2	empty spiracles homeobox 2	112.247	0.183814	0.117363	1.56668	0.117189	0.99969	0.0202809	0.610119	139.879	119.674	80.0179	109.417
ENSCSAG00000003778	DUSP6	dual specificity phosphatase 6	78.3025	0.183697	0.114833	1.60031	0.109529	0.99969	0.017743	0.577892	84.7754	98.8609	63.3475	66.2262
ENSCSAG00000012375	CROT	carnitine O-octanoyltransferase	81.2814	0.183689	0.114452	1.60493	0.10851	0.99969	0.0174174	0.573368	82.656	108.4	61.1248	72.9448
ENSCSAG00000005234	SORCS3	sortilin related VPS10 domain containing receptor 3	136.264	0.183353	0.11749	1.55977	0.118814	0.99969	0.0208398	0.616567	129.282	184.714	96.6883	134.372
ENSCSAG00000009076	ZNF695		25.0086	0.183343	0.0897908	2.06497	0.0389255	0.99969	0.00221816	0.174758	27.552	40.7585	14.4477	17.2764
ENSCSAG00000006446	KCNJ13	potassium inwardly rectifying channel subfamily J member 13	34.1438	0.182532	0.0968868	1.89429	0.0581862	0.99969	0.00500859	0.298664	34.9698	53.7665	20.0045	27.8342
ENSCSAG00000007343	SYT10	synaptotagmin 10	754.971	0.182004	0.116931	1.55627	0.119645	0.99969	0.0211285	0.619814	731.188	937.445	590.132	761.122
ENSCSAG00000006537	PTCH1	protein patched homolog 1	160.456	0.181009	0.119224	1.51825	0.128951	0.99969	0.0244898	0.653937	188.625	173.44	130.029	149.729
ENSCSAG00000002115	ACAD8	acyl-CoA dehydrogenase family member 8	55.8443	0.180904	0.109304	1.65936	0.0970438	0.99969	0.0139552	0.518488	75.2381	59.8369	42.2317	46.0704
ENSCSAG00000001744	KMT5C	lysine methyltransferase 5C	72.5918	0.180694	0.113691	1.59152	0.111492	0.99969	0.0183781	0.586447	93.2529	78.0481	56.6793	62.387
ENSCSAG00000007401	PARP9	poly(ADP-ribose) polymerase family member 9	101.752	0.180263	0.11728	1.538	0.124048	0.99969	0.0226896	0.636462	127.163	107.533	81.1293	91.181
ENSCSAG00000011678	EOGT	EGF domain specific O-linked N-acetylglucosamine transferase	74.5847	0.180063	0.113627	1.58485	0.113	0.99969	0.0188729	0.592874	79.4769	96.2593	54.4566	68.1458
ENSCSAG00000008644	ETV6	ETS variant transcription factor 6	149.36	0.179672	0.119204	1.50741	0.131706	0.99969	0.0255294	0.663284	168.491	168.237	131.14	129.573
ENSCSAG00000018671	FLRT3	fibronectin leucine rich transmembrane protein 3	352.645	0.17913	0.118845	1.50668	0.131892	0.99969	0.0256004	0.663904	345.46	440.538	265.615	358.965
ENSCSAG00000009929	MOB2	MOB kinase activator 2	129.92	0.178956	0.118693	1.50894	0.131315	0.99969	0.0253808	0.66198	161.073	134.416	116.693	107.498
ENSCSAG00000013408	KIAA1586		27.3541	0.178335	0.0927585	1.93798	0.0526253	0.99969	0.00408904	0.264794	32.8505	39.8913	15.559	21.1156
ENSCSAG00000011228	OGT	O-linked N-acetylglucosamine (GlcNAc) transferase	384.869	0.177924	0.117506	1.51369	0.130104	0.99969	0.0249224	0.657889	396.325	454.413	306.735	382.001
ENSCSAG00000009560	CDKN1C	cyclin dependent kinase inhibitor 1C	83.0913	0.177627	0.115183	1.54474	0.122408	0.99969	0.0221021	0.630371	107.029	86.7201	73.3497	65.2664
ENSCSAG00000015287	ZNF217	zinc finger protein 217	197.952	0.177595	0.119161	1.48954	0.136344	0.99969	0.0273262	0.678302	193.924	252.356	147.811	197.719
ENSCSAG00000001495	DPYD	dihydropyrimidine dehydrogenase	512.972	0.177572	0.117216	1.51456	0.129885	0.99969	0.0248398	0.657141	535.145	597.502	392.31	526.93
ENSCSAG00000007446	CAPRIN2		60.8507	0.176902	0.110628	1.60135	0.1093	0.99969	0.0176695	0.576879	63.5815	81.5169	52.2339	46.0704
ENSCSAG00000009325	ZCCHC24	zinc finger CCHC-type containing 24	79.4224	0.176556	0.115	1.53721	0.124243	0.99969	0.0227598	0.637176	92.1932	92.7905	72.2384	60.4674
ENSCSAG00000016710	TBC1D19		51.1487	0.176502	0.106702	1.6567	0.0975793	0.99969	0.0141087	0.521219	50.8652	73.7121	37.7862	42.2312
ENSCSAG00000002183	NAPSA	napsin-A	56.2	0.176424	0.108097	1.63934	0.101142	0.99969	0.0151506	0.538964	75.2381	60.7041	53.3453	35.5126
ENSCSAG00000017463	ANKRD10	ankyrin repeat domain 10	114.357	0.175921	0.11766	1.49455	0.135031	0.99969	0.0268118	0.674142	113.387	148.291	91.1315	104.618
ENSCSAG00000013876	SYNE2	spectrin repeat containing nuclear envelope protein 2	3595.58	0.175651	0.108117	1.62465	0.104237	0.99969	0.0160846	0.553789	3669.71	4135.68	3120.7	3456.24
ENSCSAG00000014315	HOXA13		47.2893	0.175454	0.105907	1.65963	0.0969894	0.99969	0.0139397	0.51821	55.104	60.7041	31.1181	42.2312
ENSCSAG00000007201	RRM2		132.787	0.175243	0.118872	1.47484	0.140257	0.99969	0.0288861	0.690294	161.073	139.619	113.359	117.096
ENSCSAG00000016379	PLPP1	phospholipid phosphatase 1	256.777	0.174966	0.118297	1.47865	0.139235	0.99969	0.0284748	0.68722	276.58	292.247	214.492	243.789
ENSCSAG00000015489	BRMS1L	BRMS1 like transcriptional repressor	78.4106	0.174157	0.112829	1.54446	0.122477	0.99969	0.0221265	0.630627	97.4917	87.5873	48.8998	79.6634
ENSCSAG00000011801	SPTLC3	serine palmitoyltransferase long chain base subunit 3	153.721	0.173924	0.118927	1.46178	0.143801	0.99969	0.0303345	0.700655	148.357	198.589	127.806	140.131
ENSCSAG00000016849	PDE7B	phosphodiesterase 7B	75.5966	0.17326	0.114324	1.51619	0.129471	0.99969	0.0246845	0.655727	89.0141	87.5873	56.6793	69.1056
ENSCSAG00000011096	SMIM30		59.5464	0.17296	0.110351	1.56974	0.116475	0.99969	0.0200376	0.607245	76.2978	65.9073	42.2317	53.7488
ENSCSAG00000019090	H1-3	H1.3 linker histone, cluster member	199.223	0.172933	0.119216	1.45109	0.146755	0.99969	0.0315666	0.708938	212.998	231.543	197.822	154.528
ENSCSAG00000002992	KRT19	keratin 19	81.5541	0.172761	0.115342	1.49944	0.13376	0.99969	0.0263181	0.670046	101.73	87.5873	67.7929	69.1056
ENSCSAG00000006100	STX3	syntaxin 3	60.6115	0.172226	0.111156	1.55181	0.120707	0.99969	0.0215003	0.623916	76.2978	67.6417	46.6771	51.8292
ENSCSAG00000000778	PGD		145.211	0.172048	0.119097	1.44429	0.148657	0.99969	0.0323722	0.714111	162.133	164.768	116.693	137.251
ENSCSAG00000011086	TRPM7		157.476	0.172047	0.119181	1.44308	0.148998	0.99969	0.0325176	0.715025	171.67	182.112	124.472	151.648
ENSCSAG00000007017	METTL9	methyltransferase like 9	734.907	0.171979	0.111995	1.53557	0.124643	0.99969	0.0229045	0.63864	775.695	823.841	691.266	648.825
ENSCSAG00000001537	WDR47	WD repeat domain 47	43.7366	0.171974	0.104166	1.65493	0.0979387	0.99969	0.0142122	0.523043	54.0443	53.7665	27.784	39.3518
ENSCSAG00000015096	GOLGA7	golgin A7	71.5429	0.171149	0.113738	1.5054	0.132222	0.99969	0.0257266	0.665001	80.5366	86.7201	55.568	63.3468
ENSCSAG00000007633	TET1	tet methylcytosine dioxygenase 1	43.1563	0.17067	0.104802	1.63321	0.102424	0.99969	0.0155341	0.545169	51.9249	53.7665	33.3408	33.593
ENSCSAG00000011884		zinc finger protein 280D	85.656	0.170081	0.114729	1.48196	0.13835	0.99969	0.0281208	0.684524	87.9544	111.002	61.1248	82.5428
ENSCSAG00000004845	SLC4A4		104.341	0.169172	0.11758	1.43848	0.150297	0.99969	0.0330744	0.718471	111.268	126.611	84.4633	95.0202
ENSCSAG00000014401	RBM5	RNA binding motif protein 5	151.851	0.169154	0.119071	1.42066	0.155417	0.99969	0.0353116	0.73152	181.207	160.432	118.915	146.849
ENSCSAG00000018151	POR	NADPH--cytochrome P450 reductase	101.666	0.16886	0.117179	1.44281	0.149073	0.99969	0.0325499	0.715227	123.984	108.4	95.5769	78.7036
ENSCSAG00000004176	FOLR1	folate receptor alpha	66.3929	0.168187	0.112845	1.49184	0.135742	0.99969	0.0270897	0.676403	78.4172	77.1809	53.3453	56.6282
ENSCSAG00000012266	MAGED2	MAGE family member D2	91.2418	0.167513	0.116698	1.43639	0.15089	0.99969	0.0333301	0.720027	104.91	104.064	81.1293	74.8644
ENSCSAG00000001638		zinc finger protein 17	43.0465	0.167122	0.103942	1.61146	0.107079	0.99969	0.0169655	0.566925	45.5668	59.8369	32.2294	34.5528
ENSCSAG00000014904	IREB2	iron responsive element binding protein 2	315.014	0.166523	0.118379	1.40623	0.159655	0.99969	0.0372149	0.741704	336.982	358.154	243.388	321.533
ENSCSAG00000006719	ZNF627		91.3537	0.166515	0.116182	1.43376	0.151642	0.99969	0.0336555	0.721981	111.268	98.8609	68.9043	86.382
ENSCSAG00000018085	MRPS21	mitochondrial ribosomal protein S21	109.139	0.166487	0.1178	1.41355	0.157493	0.99969	0.0362381	0.736575	130.342	117.939	85.5747	102.699
ENSCSAG00000015421	HECW1		29.452	0.165882	0.0952753	1.75141	0.079875	0.99969	0.0094647	0.429152	34.9698	40.7585	20.0045	22.0754
ENSCSAG00000006556	AHNAK		1304.62	0.16558	0.10956	1.51139	0.130689	0.99969	0.0251432	0.659871	1410.45	1412.67	1264.73	1130.64
ENSCSAG00000002293	CEP131		53.2457	0.165571	0.108327	1.53274	0.12534	0.99969	0.0231576	0.641172	72.0591	55.5009	42.2317	43.191
ENSCSAG00000017897	RFC3	replication factor C subunit 3	48.6876	0.165452	0.106845	1.55188	0.120691	0.99969	0.0214948	0.623855	52.9846	64.1729	41.1203	36.4724
ENSCSAG00000012511	TP53INP1	tumor protein p53 inducible nuclear protein 1	146.169	0.165325	0.118987	1.38881	0.164891	0.99969	0.03963	0.753566	154.715	173.44	114.47	142.05
ENSCSAG00000011603	DLG3	discs large MAGUK scaffold protein 3	92.7841	0.165187	0.116828	1.41493	0.157089	0.99969	0.0360571	0.735603	107.029	104.931	83.352	75.8242
ENSCSAG00000011619	ARHGAP12	Rho GTPase activating protein 12	148.834	0.164262	0.118924	1.3806	0.167401	0.99969	0.040813	0.758987	160.014	174.307	112.247	148.769
ENSCSAG00000005167	TNRC6C		61.2193	0.164086	0.110074	1.49103	0.135954	0.99969	0.0271726	0.677071	62.5218	82.3841	43.343	56.6282
ENSCSAG00000006658	ZNF564		22.6461	0.163777	0.0879032	1.88286	0.0597188	0.99969	0.00527816	0.30827	30.7311	30.352	12.225	17.2764
ENSCSAG00000000867	ARHGEF10L	Rho guanine nucleotide exchange factor 10 like	60.9486	0.163304	0.110171	1.48686	0.137052	0.99969	0.0276055	0.680517	82.656	61.5713	54.4566	45.1106
ENSCSAG00000005288		diacylglycerol kinase alpha	83.6156	0.162866	0.115413	1.41306	0.157639	0.99969	0.0363036	0.736926	98.5514	93.6577	78.9065	63.3468
ENSCSAG00000012085	ANKRD46	ankyrin repeat domain 46	246.097	0.162601	0.11836	1.37346	0.169608	0.99969	0.0418661	0.763616	259.625	281.84	214.492	228.432
ENSCSAG00000017227	TSGA10	testis specific 10	113.168	0.162569	0.118285	1.37441	0.169316	0.99969	0.0417257	0.76301	127.163	128.346	94.4656	102.699
ENSCSAG00000002453	TBCEL		58.6316	0.162247	0.110228	1.47277	0.140814	0.99969	0.0291117	0.691955	65.7009	72.8449	42.2317	53.7488
ENSCSAG00000008166			73.1802	0.161893	0.114018	1.42102	0.155312	0.99969	0.035265	0.73126	89.0141	80.6497	57.7907	65.2664
ENSCSAG00000007072	EMC7		89.076	0.161797	0.116058	1.39538	0.162901	0.99969	0.0387038	0.749148	112.327	91.9233	73.3497	78.7036
ENSCSAG00000004260	IST1	IST1 factor associated with ESCRT-III	314.302	0.161747	0.117609	1.37566	0.168926	0.99969	0.0415393	0.762199	370.892	318.263	294.51	273.543
ENSCSAG00000002831	DBP	D-box binding PAR bZIP transcription factor	28.8402	0.161702	0.0946918	1.72063	0.0853187	0.99969	0.0107975	0.457555	40.2683	33.8208	21.1158	20.1558
ENSCSAG00000013454	RAB15		78.2345	0.16161	0.114142	1.41559	0.156896	0.99969	0.0359706	0.735135	79.4769	101.463	60.0134	71.985
ENSCSAG00000007690	ITPR2	inositol 1,4,5-trisphosphate receptor type 2	183.028	0.161557	0.119023	1.35653	0.174932	0.99969	0.0444571	0.774284	183.327	226.34	133.363	189.081
ENSCSAG00000002472	TLCD5	TLC domain containing 5	49.4042	0.160935	0.107272	1.50419	0.132533	0.99969	0.0258455	0.666027	64.6412	53.7665	38.8976	40.3116
ENSCSAG00000015140	PCYOX1	prenylcysteine oxidase 1	126.249	0.160854	0.118698	1.35507	0.175394	0.99969	0.0446856	0.775178	144.118	139.619	102.245	119.015
ENSCSAG00000003417	SDR42E1	short chain dehydrogenase/reductase family 42E, member 1	71.806	0.160303	0.113729	1.40989	0.158573	0.99969	0.0367247	0.739155	80.5366	85.8529	55.568	65.2664
ENSCSAG00000017675	CABLES1		67.5857	0.160266	0.112542	1.42582	0.153919	0.99969	0.03465	0.727789	73.1188	84.1185	62.2361	50.8694
ENSCSAG00000014565	PELI2	pellino E3 ubiquitin protein ligase family member 2	537.931	0.159683	0.116116	1.37487	0.169171	0.99969	0.0416566	0.76271	551.04	621.783	435.653	543.247
ENSCSAG00000003984	TBCK	TBC1 domain containing kinase	171.53	0.159629	0.119226	1.33852	0.180726	0.99969	0.0473583	0.78514	192.864	189.05	133.363	170.844
ENSCSAG00000010024	KIF24		20.193	0.159251	0.0851458	1.89438	0.0581741	0.99969	0.0050065	0.298593	26.4923	28.6176	12.225	13.4372
ENSCSAG00000010418	CEP250	centrosomal protein 250	133.462	0.159169	0.118801	1.34078	0.179992	0.99969	0.0469858	0.783805	162.133	137.018	123.361	111.337
ENSCSAG00000005865	ROBO2		92.6484	0.159124	0.114549	1.3887	0.164923	0.99969	0.039645	0.753636	102.79	111.002	58.9021	97.8996
ENSCSAG00000006111	KCNH3		126.823	0.158777	0.118786	1.33688	0.181261	0.99969	0.0476302	0.786104	147.297	137.018	107.802	115.176
ENSCSAG00000009545	CREBRF	CREB3 regulatory factor	53.9762	0.158703	0.109232	1.45465	0.145767	0.99969	0.031152	0.706203	63.5815	64.1729	41.1203	47.0302
ENSCSAG00000018079			47.1792	0.158454	0.100871	1.57391	0.115508	0.99969	0.0197099	0.603305	49.8055	66.7745	22.2272	49.9096
ENSCSAG00000017005	CPLANE1	ciliogenesis and planar polarity effector 1	190.151	0.158426	0.119123	1.32918	0.183789	0.99969	0.0489256	0.790581	196.043	228.074	137.809	198.679
ENSCSAG00000007778	C6orf62	chromosome unknown C6orf62 homolog	146.223	0.158419	0.118527	1.33592	0.181574	0.99969	0.04779	0.786667	134.581	193.386	124.472	132.452
ENSCSAG00000012245	CIRBP	cold inducible RNA binding protein	506.263	0.158364	0.115467	1.37182	0.170121	0.99969	0.0421124	0.764674	592.368	509.047	487.887	435.749
ENSCSAG00000003041	KLHL11		64.9293	0.158287	0.111131	1.42803	0.153284	0.99969	0.0343714	0.726187	89.0141	63.3057	55.568	51.8292
ENSCSAG00000007391	RHOBTB1	Rho related BTB domain containing 1	283.761	0.158224	0.117763	1.34379	0.179016	0.99969	0.0464932	0.782014	315.788	305.255	271.172	242.829
ENSCSAG00000003496	IL15	interleukin 15	34.4784	0.158038	0.0980722	1.61871	0.105509	0.99969	0.0164761	0.559725	34.9698	51.1649	27.784	23.995
ENSCSAG00000000571	HASPIN	histone H3 associated protein kinase	37.4212	0.158021	0.10115	1.56829	0.116813	0.99969	0.0201526	0.608609	49.8055	42.4929	26.6726	30.7136
ENSCSAG00000010743		membrane associated ring-CH-type finger 8	69.4122	0.157743	0.113344	1.39366	0.16342	0.99969	0.0389445	0.750311	82.656	78.0481	62.2361	54.7086
ENSCSAG00000006164	SORBS1		24.7486	0.157651	0.0906474	1.75573	0.0791344	0.99969	0.00928995	0.42513	31.7908	32.9536	18.8931	15.3568
ENSCSAG00000005478	PRR5L	proline rich 5 like	512.765	0.157415	0.114062	1.37995	0.167603	0.99969	0.0409086	0.759415	551.04	561.079	452.323	486.619
ENSCSAG00000019247	AMIGO2	adhesion molecule with Ig like domain 2	73.0538	0.157197	0.113576	1.38432	0.166262	0.99969	0.0402741	0.756547	74.1785	94.5249	61.1248	62.387
ENSCSAG00000013347	DHTKD1		48.061	0.156432	0.106981	1.46594	0.142665	0.99969	0.0298664	0.697383	58.2831	56.3681	41.1203	36.4724
ENSCSAG00000005940	TBX2		133.235	0.156355	0.118789	1.31724	0.187757	0.99969	0.0509909	0.797345	161.073	137.018	124.472	110.377
ENSCSAG00000001727			47.1341	0.156136	0.10456	1.50038	0.133516	0.99969	0.0262237	0.669251	68.88	45.0945	40.0089	34.5528
ENSCSAG00000006161	LMBR1L	limb development membrane protein 1 like	47.3219	0.155957	0.106687	1.46529	0.142842	0.99969	0.0299391	0.697896	59.3428	53.7665	37.7862	38.392
ENSCSAG00000012167	RPS6KA2	ribosomal protein S6 kinase A2	72.9983	0.155839	0.114173	1.36629	0.171848	0.99969	0.0429472	0.768188	84.7754	83.2513	64.4589	59.5076
ENSCSAG00000004025	PPME1		134.476	0.155708	0.11876	1.31068	0.189964	0.99969	0.0521566	0.800973	148.357	152.627	104.468	132.452
ENSCSAG00000006713	ARMC9		35.038	0.155411	0.0953072	1.63671	0.101691	0.99969	0.0153143	0.541633	36.0295	52.8993	16.6704	34.5528
ENSCSAG00000011848			60.9852	0.155172	0.111207	1.39788	0.162149	0.99969	0.0383566	0.74745	72.0591	70.2433	55.568	46.0704
ENSCSAG00000003979			54.3227	0.15514	0.109074	1.42416	0.1544	0.99969	0.0348619	0.728995	66.7606	61.5713	40.0089	48.9498
ENSCSAG00000019415	ENC1	ectodermal-neural cortex 1	135.745	0.154959	0.118965	1.30221	0.192843	0.99969	0.053695	0.805566	143.058	159.565	115.581	124.774
ENSCSAG00000013178			122.965	0.154726	0.116336	1.33305	0.182514	0.99969	0.0482705	0.788341	164.252	115.338	127.806	84.4624
ENSCSAG00000017829	ZKSCAN1		88.704	0.154682	0.116448	1.32885	0.183898	0.99969	0.0489819	0.790772	102.79	98.8609	74.4611	78.7036
ENSCSAG00000005797	KBTBD4	kelch repeat and BTB domain containing 4	35.5911	0.154645	0.0992918	1.56677	0.117167	0.99969	0.0202735	0.610032	45.5668	42.4929	32.2294	22.0754
ENSCSAG00000014882	SPIDR	scaffold protein involved in DNA repair	129.443	0.15451	0.117807	1.31077	0.189937	0.99969	0.0521422	0.800928	118.686	172.573	105.579	120.935
ENSCSAG00000006052	NIT2		39.424	0.154486	0.102689	1.50864	0.131392	0.99969	0.0254099	0.662235	45.5668	50.2977	31.1181	30.7136
ENSCSAG00000018559	RBM12B	RNA binding motif protein 12B	63.2934	0.154379	0.11136	1.38942	0.164706	0.99969	0.0395437	0.753161	82.656	65.0401	55.568	49.9096
ENSCSAG00000011748	ANGPT1		176.852	0.154286	0.119194	1.29395	0.195681	0.99969	0.0552313	0.809947	167.431	224.605	158.924	156.447
ENSCSAG00000000217	H2AC20	histone cluster 2 H2A family member c	430.016	0.154248	0.116078	1.32914	0.183802	0.99969	0.0489326	0.790605	495.936	438.804	416.76	368.563
ENSCSAG00000005856	YPEL2	yippee like 2	90.9956	0.154067	0.116722	1.32057	0.186646	0.99969	0.0504085	0.795482	104.91	101.463	78.9065	78.7036
ENSCSAG00000008553	EFR3B	EFR3 homolog B	63.7732	0.153719	0.110084	1.39688	0.16245	0.99969	0.0384955	0.748132	75.2381	74.5793	40.0089	65.2664
ENSCSAG00000009924	KANSL1L	KAT8 regulatory NSL complex subunit 1 like	169.201	0.153693	0.119216	1.28856	0.197549	0.99969	0.0562533	0.812753	174.849	200.323	135.586	166.045
ENSCSAG00000011906	FZD6	frizzled class receptor 6	1029.96	0.153554	0.113064	1.35796	0.174476	0.99969	0.0442324	0.773397	1035.32	1190.67	866.86	1026.99
ENSCSAG00000006712	ZBTB3	zinc finger and BTB domain containing 3	61.7102	0.153355	0.110992	1.3849	0.166082	0.99969	0.0401894	0.756159	76.2978	67.6417	57.7907	45.1106
ENSCSAG00000017324			11.3812	0.153244	0.0679975	2.36083	0.0182341	0.99969	0.00046933	0.0566484	22.2535	13.8752	5.5568	3.8392
ENSCSAG00000013266	KLHL24	kelch like family member 24	155.75	0.152637	0.119149	1.28082	0.200256	0.99969	0.0577491	0.816714	176.969	169.104	123.361	153.568
ENSCSAG00000006726	TMEM179B	transmembrane protein 179B	69.1813	0.152632	0.11294	1.35382	0.175794	0.99969	0.0448835	0.775947	87.9544	71.9777	61.1248	55.6684
ENSCSAG00000003031	NT5C3B		145.778	0.152513	0.119118	1.28005	0.200528	0.99969	0.0579004	0.817105	160.014	163.901	120.027	139.171
ENSCSAG00000014359	RAB2A	RAB2A, member RAS oncogene family	87.44	0.152338	0.116034	1.31276	0.189263	0.99969	0.051785	0.79983	91.1335	107.533	73.3497	77.7438
ENSCSAG00000010874	RASSF4	Ras association domain family member 4	72.9044	0.152263	0.114097	1.33491	0.181907	0.99969	0.0479597	0.787261	81.5963	85.8529	58.9021	65.2664
ENSCSAG00000005307	PPARA	peroxisome proliferator-activated receptor alpha	49.0974	0.152186	0.107026	1.42335	0.154633	0.99969	0.0349649	0.729577	55.104	61.5713	35.5635	44.1508
ENSCSAG00000002951	EXPH5	exophilin 5	164.163	0.152141	0.11884	1.27934	0.200779	0.99969	0.0580402	0.817465	156.834	208.996	126.695	164.126
ENSCSAG00000016095	TNFAIP6	TNF alpha induced protein 6	35.3767	0.152068	0.100171	1.52385	0.127546	0.99969	0.0239671	0.649039	44.5071	42.4929	26.6726	27.8342
ENSCSAG00000003765	ZNF780B		37.5167	0.152065	0.1014	1.5041	0.132556	0.99969	0.0258545	0.666104	46.6265	45.0945	26.6726	31.6734
ENSCSAG00000005852	SMG8	SMG8 nonsense mediated mRNA decay factor	66.1812	0.151927	0.112437	1.35165	0.176486	0.99969	0.0452272	0.777271	75.2381	78.0481	50.0112	61.4272
ENSCSAG00000007404	DSP	desmoplakin	400.313	0.15186	0.115661	1.31308	0.189157	0.99969	0.0517288	0.799656	445.071	423.194	377.862	355.126
ENSCSAG00000016183	ORC4	origin recognition complex subunit 4	189.192	0.151535	0.119212	1.27036	0.203955	0.99969	0.0598222	0.821935	186.506	232.41	147.811	190.04
ENSCSAG00000014910	NCOA3	nuclear receptor coactivator 3	149.098	0.151491	0.119178	1.27104	0.203714	0.99969	0.0596859	0.821601	156.834	173.44	135.586	130.533
ENSCSAG00000001225		phosphoinositide-3-kinase regulatory subunit 3	40.2443	0.151479	0.102149	1.48579	0.137334	0.99969	0.0277168	0.681391	47.6861	50.2977	25.5613	37.4322
ENSCSAG00000011104		interferon-induced transmembrane protein 1	29.1826	0.151346	0.0945577	1.60797	0.107842	0.99969	0.0172059	0.570376	34.9698	39.0241	17.7818	24.9548
ENSCSAG00000003730	BTG1	BTG anti-proliferation factor 1	55.16	0.151263	0.107589	1.40838	0.159019	0.99969	0.0369262	0.740209	52.9846	77.1809	51.1225	39.3518
ENSCSAG00000010863	ALOX12B	arachidonate 12-lipoxygenase, 12R type	14.3628	0.151152	0.0745581	2.07633	0.0378635	0.99969	0.00209673	0.168146	18.0148	24.2816	5.5568	9.598
ENSCSAG00000014583	CTSA	cathepsin A	123.459	0.150852	0.118724	1.27094	0.203749	0.99969	0.0597059	0.82165	140.939	134.416	110.025	108.457
ENSCSAG00000002462	ZNF652	zinc finger protein 652	42.2357	0.150825	0.101696	1.48742	0.136905	0.99969	0.0275472	0.680057	39.2086	63.3057	36.6749	29.7538
ENSCSAG00000014143		ribosomal protein S27a	383.711	0.150716	0.118899	1.26713	0.205108	0.99969	0.0604749	0.823517	386.788	455.281	280.063	412.714
ENSCSAG00000004875	PPP6R2		90.2117	0.150251	0.116513	1.29043	0.196901	0.99969	0.0558978	0.811786	108.089	96.2593	77.7952	78.7036
ENSCSAG00000012949	MAVS	mitochondrial antiviral signaling protein	58.0462	0.149968	0.110189	1.36317	0.17283	0.99969	0.0434255	0.770154	74.1785	61.5713	45.5657	50.8694
ENSCSAG00000006587	GALNT11	polypeptide N-acetylgalactosaminyltransferase 11	99.7888	0.149529	0.117384	1.27407	0.20264	0.99969	0.0590812	0.820103	115.506	109.267	82.2406	92.1408
ENSCSAG00000015083	ARNT2	aryl hydrocarbon receptor nuclear translocator 2	44.0544	0.149451	0.104462	1.43247	0.152009	0.99969	0.0338148	0.722928	46.6265	58.9697	32.2294	38.392
ENSCSAG00000010861		protein phosphatase 2 regulatory subunit B''alpha	66.5417	0.149255	0.112363	1.32846	0.184026	0.99969	0.0490478	0.790994	73.1188	80.6497	50.0112	62.387
ENSCSAG00000007709	DCDC2	doublecortin domain containing 2	1611.59	0.149111	0.109125	1.36636	0.171826	0.99969	0.0429367	0.768144	1666.9	1793.37	1415.87	1570.23
ENSCSAG00000010030		bis(5'-nucleosyl)-tetraphosphatase [asymmetrical]	12.9375	0.148772	0.0713829	2.16118	0.0306812	0.99969	0.00136528	0.122908	19.0745	19.9456	8.89088	3.8392
ENSCSAG00000018636	COMMD5	COMM domain containing 5	51.6487	0.148679	0.105907	1.41036	0.158433	0.99969	0.0366615	0.738823	69.9397	52.8993	51.1225	32.6332
ENSCSAG00000017359	ZNF292	zinc finger protein 292	175.603	0.148652	0.11924	1.24613	0.212717	0.99969	0.0648637	0.83347	186.506	201.191	140.031	174.684
ENSCSAG00000002814	NCAM1		92.3973	0.14854	0.116666	1.27347	0.202851	0.99969	0.0591999	0.820399	97.4917	111.002	83.352	77.7438
ENSCSAG00000004456	AKIP1	A-kinase interacting protein 1	43.5183	0.148467	0.105017	1.41707	0.156462	0.99969	0.0357766	0.734081	51.9249	52.0321	35.5635	34.5528
ENSCSAG00000007766	PHF6	PHD finger protein 6	111.268	0.148433	0.118125	1.25678	0.208833	0.99969	0.062606	0.828494	118.686	130.08	102.245	94.0604
ENSCSAG00000012535	NPL	N-acetylneuraminate pyruvate lyase	41.2544	0.147892	0.103823	1.42804	0.15328	0.99969	0.0343696	0.726176	48.7458	50.2977	33.3408	32.6332
ENSCSAG00000012730	DERL2		155.795	0.147832	0.11902	1.24136	0.214473	0.99969	0.0658962	0.83565	160.014	185.581	121.138	156.447
ENSCSAG00000004192	BPTF		347.454	0.147761	0.117627	1.25575	0.209207	0.99969	0.0628218	0.828983	346.519	409.319	292.288	341.689
ENSCSAG00000016636	NELFB		167.613	0.147727	0.11918	1.24052	0.214782	0.99969	0.0660786	0.83603	202.401	168.237	164.481	135.332
ENSCSAG00000011756	PLSCR3	phospholipid scramblase 3	76.3423	0.147675	0.114451	1.29045	0.196895	0.99969	0.0558943	0.811777	86.8948	87.5873	58.9021	71.985
ENSCSAG00000019533	RAB9A	RAB9A, member RAS oncogene family	45.6924	0.146789	0.105401	1.3962	0.162654	0.99969	0.0385895	0.748591	60.4025	48.5633	34.4521	39.3518
ENSCSAG00000016091			52.8345	0.146732	0.108684	1.35252	0.17621	0.99969	0.0450899	0.776744	66.7606	57.2353	42.2317	45.1106
ENSCSAG00000016253	SERINC1	serine incorporator 1	73.7386	0.146466	0.114319	1.28213	0.199796	0.99969	0.0574939	0.81605	86.8948	81.5169	62.2361	64.3066
ENSCSAG00000001999	KRTCAP2	keratinocyte associated protein 2	148.244	0.146192	0.119169	1.22695	0.219842	0.99969	0.0690977	0.842063	171.67	156.096	128.918	136.292
ENSCSAG00000015786	TTI2		45.1087	0.146097	0.105732	1.38513	0.166012	0.99969	0.0401565	0.756008	55.104	52.0321	37.7862	35.5126
ENSCSAG00000010492	CADPS2		201.512	0.146079	0.11912	1.22552	0.220379	0.99969	0.0694219	0.842684	184.386	261.028	160.036	200.598
ENSCSAG00000013293	FAM13B	family with sequence similarity 13 member B	170.767	0.146078	0.119156	1.2252	0.220501	0.99969	0.0694953	0.842824	167.431	209.863	137.809	167.965
ENSCSAG00000014887	VCAN	versican	6370.89	0.146069	0.112079	1.30331	0.19247	0.99969	0.0534944	0.804979	6070.98	7630.5	5408.99	6373.07
ENSCSAG00000015482	BAG4	BAG cochaperone 4	92.148	0.145968	0.116367	1.25404	0.209829	0.99969	0.0631816	0.829791	100.671	107.533	71.127	89.2614
ENSCSAG00000005212		SWI/SNF related, matrix associated, actin dependent regulator of chromatin subfamily c member 2	162.436	0.145851	0.119238	1.22359	0.221108	0.99969	0.0698629	0.843522	190.745	167.37	146.699	144.93
ENSCSAG00000003886	STRADA	STE20 related adaptor alpha	89.9599	0.145826	0.116271	1.25391	0.209875	0.99969	0.0632082	0.82985	97.4917	105.799	71.127	85.4222
ENSCSAG00000007507	SIRT1	sirtuin 1	120.771	0.145774	0.118119	1.23375	0.217296	0.99969	0.0675709	0.839068	135.641	134.416	91.1315	121.895
ENSCSAG00000013098	DCAF5	DDB1 and CUL4 associated factor 5	167.064	0.145759	0.11912	1.22291	0.221365	0.99969	0.0700184	0.843815	161.073	208.128	137.809	161.246
ENSCSAG00000015706	PLA2R1	phospholipase A2 receptor 1	119.618	0.145706	0.118478	1.22965	0.218827	0.99969	0.0684875	0.840879	123.984	142.221	106.691	105.578
ENSCSAG00000002057	DDX55	DEAD-box helicase 55	52.5867	0.145684	0.108221	1.34773	0.177745	0.99969	0.0458552	0.779649	64.6412	58.9697	37.7862	48.9498
ENSCSAG00000002520	ERP29	endoplasmic reticulum protein 29	217.474	0.145554	0.119183	1.22232	0.221587	0.99969	0.0701531	0.844068	243.729	235.879	236.72	153.568
ENSCSAG00000005668			101.474	0.145512	0.116881	1.24667	0.212518	0.99969	0.064747	0.83322	126.103	102.33	97.7996	79.6634
ENSCSAG00000010168	MAP3K21	mitogen-activated protein kinase kinase kinase 21	91.1572	0.145128	0.11618	1.2492	0.211593	0.99969	0.0642064	0.832051	91.1335	114.471	82.2406	76.784
ENSCSAG00000016306	TPD52L1	TPD52 like 1	1221.31	0.144995	0.112978	1.28327	0.199397	0.99969	0.0572725	0.81547	1231.36	1397.06	1015.78	1241.02
ENSCSAG00000007468	HSPBAP1	HSPB1 associated protein 1	39.8005	0.144599	0.102249	1.41668	0.156578	0.99969	0.0358284	0.734364	46.6265	49.4305	26.6726	36.4724
ENSCSAG00000001790	SCNM1	sodium channel modifier 1	21.2433	0.144567	0.086509	1.68849	0.091317	0.99969	0.0123642	0.488236	26.4923	29.4848	15.559	13.4372
ENSCSAG00000014659	HSD17B4	hydroxysteroid 17-beta dehydrogenase 4	141.741	0.144479	0.119112	1.21278	0.225214	0.99969	0.072369	0.848117	153.655	159.565	122.25	131.493
ENSCSAG00000012552	ENPP5	ectonucleotide pyrophosphatase/phosphodiesterase family member 5	47.2213	0.144363	0.103728	1.39256	0.163753	0.99969	0.0390994	0.751054	49.8055	63.3057	27.784	47.99
ENSCSAG00000002499	NOSIP	nitric oxide synthase interacting protein	69.4947	0.144265	0.111859	1.29312	0.19597	0.99969	0.0553887	0.810384	89.0141	71.1105	68.9043	48.9498
ENSCSAG00000001653	DENND2C	DENN domain containing 2C	24.0501	0.144098	0.0899006	1.61668	0.105947	0.99969	0.0166117	0.561744	30.7311	31.2192	18.8931	15.3568
ENSCSAG00000008616	WDR53	WD repeat domain 53	21.2809	0.144026	0.084451	1.72213	0.0850455	0.99969	0.0107285	0.456178	27.552	29.4848	8.89088	19.196
ENSCSAG00000015239		methylmalonyl-CoA epimerase	58.4508	0.143951	0.110236	1.30621	0.19148	0.99969	0.0529638	0.80341	64.6412	71.1105	43.343	54.7086
ENSCSAG00000007583	ADCY5		42.3258	0.143789	0.103888	1.38863	0.164944	0.99969	0.0396551	0.753683	56.1637	45.0945	34.4521	33.593
ENSCSAG00000006262	CEP97	centrosomal protein 97	26.0395	0.143751	0.0911248	1.59272	0.111222	0.99969	0.01829	0.58528	37.0892	29.4848	22.2272	15.3568
ENSCSAG00000004177	CNOT2	CCR4-NOT transcription complex subunit 2	419.03	0.143698	0.117356	1.22406	0.220928	0.99969	0.0697538	0.843315	420.698	488.234	340.076	427.111
ENSCSAG00000006777	TMEM117		96.562	0.143464	0.115373	1.24298	0.213874	0.99969	0.0655427	0.83491	108.089	111.002	64.4589	102.699
ENSCSAG00000005528	BTRC	beta-transducin repeat containing E3 ubiquitin protein ligase	82.1859	0.14329	0.115197	1.24355	0.213664	0.99969	0.0654193	0.83465	84.7754	101.463	66.6816	75.8242
ENSCSAG00000013414	NISCH		111.98	0.143043	0.118254	1.20961	0.226429	0.99969	0.0731185	0.84944	121.865	127.479	97.7996	100.779
ENSCSAG00000011731	IGBP1	immunoglobulin binding protein 1	150.891	0.142836	0.119164	1.1988	0.230605	0.99969	0.0757198	0.853856	158.954	173.44	144.477	126.694
ENSCSAG00000002772	NR1D1	nuclear receptor subfamily 1 group D member 1	29.8589	0.142744	0.0951651	1.50549	0.132197	0.99969	0.0257171	0.664919	32.8505	41.6257	20.0045	24.9548
ENSCSAG00000011338	WRAP53		66.7281	0.142718	0.11231	1.27168	0.203488	0.99969	0.0595584	0.821287	68.88	84.1185	61.1248	52.789
ENSCSAG00000014098	OSER1	oxidative stress responsive serine rich 1	143.252	0.142623	0.11897	1.19823	0.230828	0.99969	0.0758596	0.854086	144.118	172.573	120.027	136.292
ENSCSAG00000008728	FAM193B		54.3223	0.14254	0.109344	1.30532	0.191783	0.99969	0.0531261	0.803892	60.4025	65.9073	47.7885	43.191
ENSCSAG00000015059	TMEM232		21.6691	0.142422	0.0856372	1.67693	0.0935557	0.99969	0.0129751	0.500292	24.3729	32.9536	11.1136	18.2362
ENSCSAG00000009285	CATSPERE		51.0412	0.142388	0.104828	1.36421	0.172503	0.99969	0.043266	0.769502	59.3428	61.5713	54.4566	28.794
ENSCSAG00000008572		DEP domain containing 5, GATOR1 subcomplex subunit	70.1573	0.142301	0.112568	1.26663	0.205287	0.99969	0.0605766	0.823761	82.656	78.0481	70.0157	49.9096
ENSCSAG00000011316			35.3896	0.142188	0.100223	1.4235	0.15459	0.99969	0.0349459	0.72947	43.4474	42.4929	27.784	27.8342
ENSCSAG00000000687	CCNL2		56.0835	0.14218	0.107853	1.32212	0.186128	0.99969	0.0501384	0.794607	62.5218	68.5089	57.7907	35.5126
ENSCSAG00000003807	SELENOV		16.2344	0.14212	0.0787551	1.83896	0.0659213	0.99969	0.00643987	0.347148	24.3729	20.8128	11.1136	8.6382
ENSCSAG00000017443	PLEKHG4B		153.846	0.142031	0.119225	1.1914	0.233497	0.99969	0.0775447	0.856803	173.79	164.768	136.697	140.131
ENSCSAG00000017444	PHIP	pleckstrin homology domain interacting protein	262.733	0.142001	0.1185	1.19803	0.230904	0.99969	0.0759074	0.854165	257.505	313.927	243.388	236.111
ENSCSAG00000006475	FADS2	fatty acid desaturase 2	40.7655	0.141556	0.103079	1.37619	0.168762	0.99969	0.0414606	0.761855	50.8652	46.8289	28.8953	36.4724
ENSCSAG00000007925	SMC6		174.093	0.141435	0.119229	1.18581	0.235699	0.99969	0.0789474	0.858989	189.685	193.386	136.697	176.603
ENSCSAG00000018618	LRATD2	LRAT domain containing 2	76.5463	0.141433	0.113965	1.24327	0.213769	0.99969	0.0654813	0.834781	95.3723	78.9153	73.3497	58.5478
ENSCSAG00000014646	COMMD1	copper metabolism domain containing 1	60.4601	0.141408	0.110753	1.27707	0.201579	0.99969	0.0584869	0.818607	67.8203	71.9777	44.4544	57.588
ENSCSAG00000004818	DPY19L3	dpy-19 like C-mannosyltransferase 3	67.702	0.14126	0.111478	1.2667	0.205264	0.99969	0.0605635	0.82373	70.9994	84.9857	46.6771	68.1458
ENSCSAG00000001059	ZBTB8OS	zinc finger and BTB domain containing 8 opposite strand	98.5411	0.14119	0.11734	1.20317	0.228909	0.99969	0.0746584	0.852086	105.969	114.471	84.4633	89.2614
ENSCSAG00000005645		BRISC and BRCA1 A complex member 1	122.043	0.140901	0.117455	1.20099	0.229756	0.99969	0.0751879	0.852975	163.193	110.135	104.468	110.377
ENSCSAG00000018423	GPRIN2	G protein regulated inducer of neurite outgrowth 2	52.6731	0.140707	0.108673	1.29749	0.194463	0.99969	0.0545691	0.808083	64.6412	58.1025	46.6771	41.2714
ENSCSAG00000006611		WD repeat domain 83	26.5161	0.140691	0.092764	1.52614	0.126974	0.99969	0.023756	0.64702	33.9101	32.9536	20.0045	19.196
ENSCSAG00000017853	LAMTOR4	late endosomal/lysosomal adaptor, MAPK and MTOR activator 4	111.753	0.140573	0.117625	1.19644	0.231524	0.99969	0.0762977	0.854803	131.402	117.939	112.247	85.4222
ENSCSAG00000000219	H2BC21	histone cluster 2 H2B family member e	300.004	0.140523	0.117761	1.19335	0.232732	0.99969	0.0770603	0.856033	346.519	304.388	261.17	287.94
ENSCSAG00000005674	DNMBP	dynamin binding protein	162.75	0.140307	0.119242	1.17659	0.239361	0.99969	0.0813047	0.862515	181.207	176.042	141.143	152.608
ENSCSAG00000006048	BCDIN3D		47.1054	0.140294	0.105481	1.33475	0.18196	0.99969	0.0479866	0.787355	58.2831	52.8993	45.5657	31.6734
ENSCSAG00000015603		INO80 complex subunit B	58.396	0.140242	0.10915	1.28786	0.197794	0.99969	0.0563875	0.813115	80.5366	55.5009	46.6771	50.8694
ENSCSAG00000002754	REXO2	RNA exonuclease 2	44.1805	0.139993	0.105221	1.33375	0.182285	0.99969	0.0481533	0.787935	55.104	49.4305	36.6749	35.5126
ENSCSAG00000001510	CDC14A	cell division cycle 14A	64.6168	0.139847	0.110077	1.27203	0.203363	0.99969	0.0594879	0.821113	61.4621	87.5873	63.3475	46.0704
ENSCSAG00000004684	BTBD10	BTB domain containing 10	79.5613	0.139661	0.115226	1.21308	0.225101	0.99969	0.0722995	0.847994	92.1932	87.5873	72.2384	66.2262
ENSCSAG00000004955	SGCB		31.5114	0.139606	0.0961203	1.45721	0.145059	0.99969	0.0308564	0.70422	31.7908	45.9617	23.3386	24.9548
ENSCSAG00000014027	RAD54L2	RAD54 like 2	171.307	0.139577	0.119232	1.17039	0.241843	0.99969	0.0829197	0.864831	185.446	189.917	146.699	163.166
ENSCSAG00000001063	S100PBP	S100P binding protein	99.1487	0.139439	0.116176	1.20035	0.230003	0.99969	0.0753424	0.853232	93.2529	129.213	94.4656	79.6634
ENSCSAG00000008999	ATP5PF	ATP synthase peripheral stalk subunit F6	97.0873	0.139278	0.116961	1.19043	0.233876	0.99969	0.0777853	0.857183	103.85	113.603	77.7952	93.1006
ENSCSAG00000017360	NDUFS6	NADH:ubiquinone oxidoreductase subunit S6	142.736	0.139272	0.118824	1.17317	0.240727	0.99969	0.082192	0.863797	170.61	144.823	142.254	113.256
ENSCSAG00000007386			47.9469	0.139165	0.106016	1.31579	0.188243	0.99969	0.0512466	0.798152	51.9249	60.7041	45.5657	33.593
ENSCSAG00000012024	CCNB2	cyclin B2	135.432	0.138985	0.118893	1.16867	0.242538	0.99969	0.0833749	0.865469	148.357	150.893	110.025	132.452
ENSCSAG00000012860	PLEKHH2	pleckstrin homology, MyTH4 and FERM domain containing H2	228.596	0.138908	0.118863	1.16819	0.24273	0.99969	0.0835003	0.865644	228.894	268.832	197.822	218.834
ENSCSAG00000004327	HSD17B11	hydroxysteroid 17-beta dehydrogenase 11	71.9648	0.138863	0.113897	1.21988	0.222509	0.99969	0.0707137	0.845113	84.7754	78.9153	58.9021	65.2664
ENSCSAG00000013153	CA2	carbonic anhydrase 2	179.919	0.138747	0.119129	1.16406	0.2444	0.99969	0.0845981	0.867156	190.745	205.527	133.363	190.04
ENSCSAG00000016413	CCNT2	cyclin T2	119.19	0.138632	0.117422	1.17973	0.238108	0.99969	0.0804948	0.861324	118.686	147.424	87.7974	122.854
ENSCSAG00000013416	RC3H2		409.505	0.138413	0.115887	1.19448	0.232291	0.99969	0.0767816	0.855586	468.384	414.522	371.194	383.92
ENSCSAG00000005714	ENTPD7	ectonucleoside triphosphate diphosphohydrolase 7	52.8377	0.138229	0.108538	1.27453	0.202477	0.99969	0.0589898	0.819875	55.104	67.6417	44.4544	44.1508
ENSCSAG00000015662	OGDH	oxoglutarate dehydrogenase	107.835	0.138212	0.11761	1.17626	0.239489	0.99969	0.0813879	0.862636	123.984	116.205	106.691	84.4624
ENSCSAG00000006567	RNASEH2A	ribonuclease H2 subunit A	98.2974	0.138208	0.115992	1.19333	0.232742	0.99969	0.0770666	0.856043	112.327	108.4	103.356	69.1056
ENSCSAG00000004126		conserved oligomeric Golgi complex subunit 8	35.6986	0.138162	0.0994338	1.39219	0.163864	0.99969	0.0391508	0.7513	37.0892	49.4305	25.5613	30.7136
ENSCSAG00000009719	TSSC4		39.0459	0.138142	0.0996222	1.39546	0.162876	0.99969	0.0386926	0.749093	58.2831	36.4225	35.5635	25.9146
ENSCSAG00000017096	PLAGL1	PLAG1 like zinc finger 1	171.11	0.137981	0.118049	1.16792	0.24284	0.99969	0.0835723	0.865745	160.014	220.269	118.915	185.241
ENSCSAG00000018360	PGRMC1	progesterone receptor membrane component 1	330.313	0.137946	0.117171	1.17743	0.239024	0.99969	0.0810865	0.862196	351.818	361.623	325.628	282.181
ENSCSAG00000005120	BRD1	bromodomain containing 1	176.829	0.137906	0.119197	1.15717	0.247203	0.99969	0.0864554	0.869638	199.222	187.315	163.37	157.407
ENSCSAG00000000744	NOL9	nucleolar protein 9	53.9554	0.137714	0.108113	1.27579	0.202031	0.99969	0.0587395	0.819246	55.104	70.2433	51.1225	39.3518
ENSCSAG00000016910	WDR19	WD repeat domain 19	80.348	0.13762	0.114582	1.20072	0.229861	0.99969	0.0752533	0.853084	78.4172	103.197	67.7929	71.985
ENSCSAG00000001213	TOE1	target of EGR1, exonuclease	28.0283	0.137422	0.0928501	1.4923	0.13562	0.99969	0.0270417	0.676014	38.1489	32.0864	25.5613	16.3166
ENSCSAG00000007893	TRIM38	tripartite motif containing 38	121.829	0.137232	0.118662	1.15639	0.247521	0.99969	0.0866671	0.869915	131.402	137.885	106.691	111.337
ENSCSAG00000005175	ADD3	adducin 3	177.128	0.137215	0.119214	1.1508	0.249814	0.99969	0.0882008	0.871887	182.267	204.659	162.259	159.327
ENSCSAG00000001040	ADGRB2		160.782	0.137079	0.119223	1.15015	0.250082	0.99969	0.0883811	0.872115	190.745	162.167	143.365	146.849
ENSCSAG00000010053	FNDC4		49.5414	0.136949	0.105554	1.30269	0.192681	0.99969	0.0536075	0.805311	63.5815	52.8993	50.0112	31.6734
ENSCSAG00000017150	ATP10D	ATPase phospholipid transporting 10D (putative)	49.9024	0.136728	0.105745	1.2964	0.194839	0.99969	0.0547732	0.808661	51.9249	65.0401	50.0112	32.6332
ENSCSAG00000001631	ZNF549	zinc finger protein 549	50.5392	0.136624	0.107956	1.26703	0.205145	0.99969	0.0604958	0.823567	55.104	62.4385	43.343	41.2714
ENSCSAG00000018349	KNDC1	kinase non-catalytic C-lobe domain containing 1	29.4734	0.136542	0.0951466	1.44011	0.149837	0.99969	0.0328767	0.717257	33.9101	39.0241	20.0045	24.9548
ENSCSAG00000016726	STIM2	stromal interaction molecule 2	31.6513	0.136362	0.096779	1.41292	0.15768	0.99969	0.0363223	0.737026	36.0295	41.6257	21.1158	27.8342
ENSCSAG00000015420	HMGCR	3-hydroxy-3-methylglutaryl-CoA reductase	160.506	0.136115	0.119222	1.14124	0.253768	0.99969	0.0908739	0.875185	165.312	186.448	136.697	153.568
ENSCSAG00000007724	GNAQ		120.56	0.136084	0.118595	1.1475	0.251177	0.99969	0.0891184	0.873039	135.641	130.947	103.356	112.297
ENSCSAG00000005506	API5	apoptosis inhibitor 5	89.227	0.13604	0.115091	1.18122	0.237517	0.99969	0.0801141	0.860756	91.1335	110.135	64.4589	91.181
ENSCSAG00000016278	EPHX1	epoxide hydrolase 1	49.4571	0.135869	0.107611	1.2646	0.206014	0.99969	0.0609901	0.824747	56.1637	58.9697	43.343	39.3518
ENSCSAG00000013368	MPP5	membrane palmitoylated protein 5	189.421	0.135842	0.119198	1.13916	0.254635	0.99969	0.0914644	0.875891	194.983	218.535	158.924	185.241
ENSCSAG00000015133	KLHDC8B	kelch domain containing 8B	64.0443	0.135791	0.11086	1.22802	0.219439	0.99969	0.068855	0.841594	84.7754	62.4385	60.0134	48.9498
ENSCSAG00000003355	LRBA		184.977	0.135635	0.119236	1.13702	0.25553	0.99969	0.0920762	0.876614	181.207	222.871	161.147	174.684
ENSCSAG00000001090	AGO4	argonaute RISC component 4	97.6708	0.13544	0.117045	1.15772	0.246979	0.99969	0.0863063	0.869442	117.626	100.595	82.2406	90.2212
ENSCSAG00000005161		signal transducer and activator of transcription 2	84.8845	0.135055	0.115893	1.16582	0.243686	0.99969	0.0841279	0.866513	99.6111	91.0561	71.127	77.7438
ENSCSAG00000011192	PXYLP1	2-phosphoxylose phosphatase 1	148.914	0.135019	0.119091	1.13339	0.257052	0.99969	0.09312	0.877828	147.297	179.511	134.475	134.372
ENSCSAG00000014948	EPB41L4A	erythrocyte membrane protein band 4.1 like 4A	141.56	0.134966	0.119012	1.1337	0.256921	0.99969	0.0930298	0.877724	153.655	157.831	115.581	139.171
ENSCSAG00000003382	CADM4	cell adhesion molecule 4	161.055	0.134848	0.119176	1.13228	0.257517	0.99969	0.0934401	0.878196	192.864	160.432	155.59	135.332
ENSCSAG00000010509	CHID1	chitinase domain containing 1	75.9984	0.134577	0.11453	1.17633	0.239464	0.99969	0.0813717	0.862613	90.0738	81.5169	70.0157	62.387
ENSCSAG00000007796	CFAP94		25.0072	0.134396	0.0909727	1.48613	0.137244	0.99969	0.0276811	0.681112	32.8505	30.352	16.6704	20.1558
ENSCSAG00000003446	GAS2L3		48.7735	0.134244	0.105659	1.27088	0.203773	0.99969	0.0597192	0.821682	46.6265	67.6417	36.6749	44.1508
ENSCSAG00000013737	MYO9A	myosin IXA	256.827	0.134133	0.118151	1.1351	0.256335	0.99969	0.0926278	0.877259	264.923	290.512	236.72	235.151
ENSCSAG00000001008		ATP synthase inhibitory factor subunit 1	46.7861	0.133813	0.103221	1.29826	0.194198	0.99969	0.054426	0.807676	40.2683	70.2433	41.1203	35.5126
ENSCSAG00000000400		myosin light polypeptide 6	70.2043	0.133785	0.112266	1.1944	0.23232	0.99969	0.0767996	0.855615	87.9544	71.9777	70.0157	50.8694
ENSCSAG00000010546	HDX	highly divergent homeobox	46.8176	0.133477	0.105629	1.26488	0.205915	0.99969	0.0609341	0.824614	56.1637	53.7665	32.2294	45.1106
ENSCSAG00000001982	ZNF610	zinc finger protein 610	87.2714	0.133418	0.11585	1.15159	0.24949	0.99969	0.0879834	0.871611	99.6111	96.2593	67.7929	85.4222
ENSCSAG00000014688	WDR48	WD repeat domain 48	164.162	0.133409	0.119161	1.11893	0.26317	0.99969	0.0973689	0.882533	161.073	198.589	136.697	160.287
ENSCSAG00000007130	IAH1	isoamyl acetate hydrolyzing esterase 1 (putative)	130.468	0.133346	0.118929	1.1213	0.26216	0.99969	0.0966619	0.881776	141.999	144.823	118.915	116.136
ENSCSAG00000014548	PIK3C2B	phosphatidylinositol-4-phosphate 3-kinase catalytic subunit type 2 beta	56.7271	0.133199	0.108888	1.22678	0.219906	0.99969	0.0691363	0.842137	72.0591	58.9697	55.568	40.3116
ENSCSAG00000014935	APC	APC regulator of WNT signaling pathway	126.132	0.133003	0.118253	1.12399	0.261017	0.99969	0.095864	0.880909	127.163	151.76	98.911	126.694
ENSCSAG00000014487	ARSK	arylsulfatase family member K	38.1165	0.132977	0.100749	1.32145	0.186352	0.99969	0.0502554	0.794987	39.2086	52.0321	26.6726	34.5528
ENSCSAG00000004006	TET2	tet methylcytosine dioxygenase 2	90.12	0.132836	0.11514	1.15281	0.24899	0.99969	0.0876486	0.871184	89.0141	113.603	66.6816	91.181
ENSCSAG00000012155	JAKMIP2	janus kinase and microtubule interacting protein 2	103.198	0.132725	0.117655	1.12788	0.259369	0.99969	0.0947194	0.879643	110.208	118.807	87.7974	95.98
ENSCSAG00000003437	ABCE1		88.7222	0.132688	0.116475	1.13955	0.254473	0.99969	0.0913538	0.87576	97.4917	100.595	80.0179	76.784
ENSCSAG00000017588	ZBTB14	zinc finger and BTB domain containing 14	43.8713	0.132676	0.10466	1.26998	0.204093	0.99969	0.0599002	0.822125	46.6265	56.3681	38.8976	33.593
ENSCSAG00000008790	CDC37L1	cell division cycle 37 like 1	83.3723	0.13236	0.115457	1.14643	0.251617	0.99969	0.0894156	0.873407	95.3723	91.9233	65.5702	80.6232
ENSCSAG00000003017	JUP	junction plakoglobin	200.626	0.132263	0.119009	1.1113	0.266441	0.99969	0.0996738	0.884937	223.595	212.464	174.483	191.96
ENSCSAG00000005712	COX15		69.4772	0.131925	0.113379	1.16471	0.244138	0.99969	0.0844258	0.866921	83.7157	73.7121	60.0134	60.4674
ENSCSAG00000005653	PHF21A		85.6812	0.131858	0.113852	1.15728	0.247158	0.99969	0.0864254	0.869599	87.9544	105.799	57.7907	91.181
ENSCSAG00000005504	PNPLA3		51.3219	0.131747	0.108307	1.21773	0.223325	0.99969	0.0712109	0.846028	56.1637	62.4385	44.4544	42.2312
ENSCSAG00000014726	AFTPH	aftiphilin	163.007	0.131648	0.119232	1.10375	0.2697	0.99969	0.101994	0.88726	164.252	191.651	144.477	151.648
ENSCSAG00000006051	NCKAP5L	NCK associated protein 5 like	126.088	0.131422	0.118791	1.10666	0.26844	0.99969	0.101094	0.88637	141.999	135.283	116.693	110.377
ENSCSAG00000019079	H2BC15	histone H2B type 1-N	137.32	0.131411	0.118897	1.10486	0.269221	0.99969	0.101651	0.886922	148.357	153.495	111.136	136.292
ENSCSAG00000005808	R3HCC1L	R3H domain and coiled-coil containing 1 like	49.645	0.131322	0.107589	1.22271	0.22144	0.99969	0.0700638	0.8439	61.4621	53.7665	41.1203	42.2312
ENSCSAG00000016860	EHMT1		225.835	0.131319	0.118675	1.10628	0.268605	0.99969	0.101212	0.886487	233.132	255.824	202.267	212.116
ENSCSAG00000001902			130.952	0.131298	0.116288	1.12828	0.259201	0.99969	0.0946034	0.879513	136.7	156.096	82.2406	148.769
ENSCSAG00000009042		TSC22 domain family member 3	90.3569	0.131241	0.116463	1.12768	0.259457	0.99969	0.0947802	0.879711	108.089	93.6577	80.0179	79.6634
ENSCSAG00000009382	DPYSL5		89.9647	0.13114	0.116525	1.12564	0.260317	0.99969	0.0953775	0.880374	102.79	97.9937	75.5725	83.5026
ENSCSAG00000017911	C18orf21	chromosome unknown C18orf21 homolog	34.4268	0.131122	0.0989652	1.33055	0.183337	0.99969	0.0486927	0.789791	46.6265	36.4225	27.784	26.8744
ENSCSAG00000017315	CNNM3		50.0513	0.131005	0.107364	1.22324	0.22124	0.99969	0.0699426	0.843672	61.4621	54.6337	46.6771	37.4322
ENSCSAG00000011634	ARL6IP5	ADP ribosylation factor like GTPase 6 interacting protein 5	368.799	0.13086	0.116383	1.12431	0.26088	0.99969	0.0957688	0.880805	406.922	385.905	323.406	358.965
ENSCSAG00000012413	SLC35B2		91.8273	0.130718	0.116811	1.1195	0.262928	0.99969	0.0971994	0.882352	103.85	100.595	82.2406	80.6232
ENSCSAG00000009469	BEX3	brain expressed X-linked 3	172.32	0.130593	0.119196	1.09629	0.272953	0.99969	0.104333	0.889508	214.058	163.034	156.702	155.488
ENSCSAG00000012045	ERG28	ergosterol biosynthesis 28 homolog	39.5897	0.130247	0.102855	1.26895	0.204459	0.99969	0.0601072	0.822629	47.6861	45.9617	31.1181	33.593
ENSCSAG00000005093	E2F8	E2F transcription factor 8	51.4702	0.130226	0.107789	1.20951	0.226465	0.99969	0.0731409	0.849479	52.9846	65.9073	46.6771	40.3116
ENSCSAG00000008912	KIAA2026	KIAA2026 ortholog	120.298	0.130214	0.117811	1.10455	0.269357	0.99969	0.101749	0.887018	125.044	141.354	90.0201	124.774
ENSCSAG00000006949	ABHD15	abhydrolase domain containing 15	24.8866	0.130195	0.0904805	1.44825	0.147547	0.99969	0.031901	0.711108	34.9698	27.7504	16.6704	20.1558
ENSCSAG00000016089	RIF1	replication timing regulatory factor 1	451.71	0.130016	0.114886	1.13158	0.257812	0.99969	0.0936431	0.878428	465.205	502.11	420.094	419.433
ENSCSAG00000015478	ALMS1	ALMS1 centrosome and basal body associated protein	209.792	0.1299	0.119043	1.09079	0.275366	0.99969	0.106083	0.891132	208.759	246.285	184.486	199.638
ENSCSAG00000014820		cell growth regulator with ring finger domain 1	39.1849	0.1299	0.102333	1.27195	0.203392	0.99969	0.0595047	0.821154	42.3877	50.2977	33.3408	30.7136
ENSCSAG00000007775	SLC25A45	solute carrier family 25 member 45	35.2922	0.129774	0.09993	1.30295	0.192591	0.99969	0.0535594	0.80517	45.5668	39.0241	27.784	28.794
ENSCSAG00000011655	NUDCD1	NudC domain containing 1	2854.29	0.129743	0.11036	1.1756	0.239754	0.99969	0.0815597	0.862886	2809.24	3271.08	2472.78	2864.04
ENSCSAG00000013602	KIF23	kinesin family member 23	155.431	0.129407	0.11923	1.0852	0.277834	0.99969	0.107886	0.892756	167.431	171.706	136.697	145.89
ENSCSAG00000016457	UAP1L1		67.5573	0.129304	0.112474	1.1516	0.249486	0.99969	0.0879805	0.871608	84.7754	68.5089	62.2361	54.7086
ENSCSAG00000012529	MAPRE1	microtubule associated protein RP/EB family member 1	112.067	0.129242	0.118131	1.09378	0.274053	0.99969	0.105129	0.890252	120.805	126.611	93.3542	107.498
ENSCSAG00000006241	TAF15	TATA-box binding protein associated factor 15	191.842	0.12918	0.119191	1.08333	0.27866	0.99969	0.108492	0.893291	194.983	222.004	162.259	188.121
ENSCSAG00000005430	MAST3		45.8357	0.129145	0.102001	1.26621	0.205437	0.99969	0.0606617	0.823965	44.5071	64.1729	26.6726	47.99
ENSCSAG00000002876	ISCU	iron-sulfur cluster assembly enzyme	96.8736	0.129071	0.117065	1.10335	0.269877	0.99969	0.102121	0.887384	115.506	99.7281	87.7974	84.4624
ENSCSAG00000012246	TOR1AIP1	torsin 1A interacting protein 1	220.582	0.128932	0.11896	1.08381	0.278448	0.99969	0.108336	0.893154	222.535	254.957	216.715	188.121
ENSCSAG00000013482	TSPAN13		174.211	0.128876	0.119242	1.08032	0.280001	0.99969	0.109479	0.894151	180.148	199.456	144.477	172.764
ENSCSAG00000001486	SLC44A3	solute carrier family 44 member 3	111.507	0.128812	0.117651	1.09418	0.273876	0.99969	0.105001	0.890133	112.327	134.416	88.9088	110.377
ENSCSAG00000002976	NPAT	protein NPAT	112.246	0.128787	0.116251	1.1069	0.268337	0.99969	0.101021	0.886297	113.387	137.018	76.6838	121.895
ENSCSAG00000017426	HMGN3	high mobility group nucleosomal binding domain 3	83.107	0.128709	0.114236	1.12641	0.25999	0.99969	0.09515	0.880122	95.3723	91.9233	57.7907	87.3418
ENSCSAG00000003526	APAF1	apoptotic peptidase activating factor 1	88.8145	0.128629	0.116254	1.10628	0.268605	0.99969	0.101212	0.886487	91.1335	106.666	77.7952	79.6634
ENSCSAG00000006021	TNRC6B		127.855	0.128575	0.118678	1.08351	0.278583	0.99969	0.108435	0.893241	131.402	149.159	123.361	107.498
ENSCSAG00000010331	C1orf131	chromosome unknown C1orf131 homolog	61.6994	0.128569	0.111283	1.15705	0.24725	0.99969	0.0864867	0.869679	77.3575	63.3057	53.3453	52.789
ENSCSAG00000013574	ITGB8	integrin subunit beta 8	38.9371	0.12851	0.101642	1.26569	0.205623	0.99969	0.0607679	0.824219	40.2683	52.0321	28.8953	34.5528
ENSCSAG00000009506	TCEAL8	transcription elongation factor A like 8	84.1588	0.128398	0.115697	1.10954	0.267196	0.99969	0.10021	0.885482	90.0738	97.9937	68.9043	79.6634
ENSCSAG00000005694	DDB2	damage specific DNA binding protein 2	95.434	0.128377	0.116174	1.10622	0.268633	0.99969	0.101232	0.886507	122.924	90.1889	82.2406	86.382
ENSCSAG00000017041	ABRACL	ABRA C-terminal like	68.3254	0.128353	0.11307	1.13539	0.256212	0.99969	0.0925432	0.87716	77.3575	77.1809	54.4566	64.3066
ENSCSAG00000012807	ARHGEF3	Rho guanine nucleotide exchange factor 3	137.701	0.128332	0.118785	1.08017	0.280068	0.99969	0.109529	0.894195	133.521	168.237	130.029	119.015
ENSCSAG00000002642	TEAD2	TEA domain transcription factor 2	80.5294	0.128302	0.115077	1.11549	0.26464	0.99969	0.0984016	0.883623	84.7754	95.3921	76.6838	65.2664
ENSCSAG00000011549	TMEM245		415.624	0.128281	0.116728	1.09869	0.271903	0.99969	0.103576	0.88879	399.504	492.57	377.862	392.558
ENSCSAG00000015773	UNC5D		46.2625	0.128107	0.105218	1.22112	0.222042	0.99969	0.0704293	0.844585	54.0443	53.7665	45.5657	31.6734
ENSCSAG00000011899	CTHRC1	collagen triple helix repeat containing 1	353.935	0.127946	0.116376	1.09941	0.271587	0.99969	0.103348	0.888572	391.026	368.561	321.183	334.97
ENSCSAG00000013296	TMEM106B	transmembrane protein 106B	131.596	0.12788	0.118879	1.07545	0.282172	0.99969	0.111086	0.895522	141.999	146.557	111.136	126.694
ENSCSAG00000009825	RHBDD3	rhomboid domain containing 3	51.554	0.127624	0.105198	1.21857	0.223007	0.99969	0.0710172	0.845673	69.9397	50.2977	53.3453	32.6332
ENSCSAG00000003799			87.1966	0.127496	0.114182	1.11561	0.26459	0.99969	0.0983665	0.883586	80.5366	115.338	65.5702	87.3418
ENSCSAG00000007480	ATG2A	autophagy related 2A	145.729	0.127455	0.119136	1.07008	0.284583	0.99969	0.112881	0.897013	168.491	150.026	130.029	134.372
ENSCSAG00000010294	IQUB	IQ motif and ubiquitin domain containing	82.5076	0.127422	0.108832	1.17028	0.241888	0.99969	0.082949	0.864872	85.8351	104.064	42.2317	97.8996
ENSCSAG00000013473		presenilin associated rhomboid like	104.466	0.127372	0.117228	1.08775	0.276706	0.99969	0.10706	0.892018	129.282	102.33	98.911	87.3418
ENSCSAG00000011914	CGNL1	cingulin like 1	109.987	0.12724	0.117776	1.08135	0.279541	0.99969	0.10914	0.893858	129.282	113.603	107.802	89.2614
ENSCSAG00000012144			29.4358	0.127143	0.0946612	1.34984	0.177068	0.99969	0.0455168	0.778374	32.8505	39.0241	26.6726	19.196
ENSCSAG00000012445	STX6		16.1794	0.127063	0.0762464	1.70497	0.0882003	0.99969	0.0115373	0.471775	25.4326	19.0784	14.4477	5.7588
ENSCSAG00000008922	CHCHD1	coiled-coil-helix-coiled-coil-helix domain containing 1	70.394	0.127026	0.113337	1.12215	0.261799	0.99969	0.0964096	0.881503	86.8948	71.9777	62.2361	60.4674
ENSCSAG00000003337	VPS25	vacuolar protein sorting 25 homolog	87.485	0.126838	0.116102	1.09345	0.274194	0.99969	0.105232	0.890348	103.85	91.0561	81.1293	73.9046
ENSCSAG00000016037	PHPT1	phosphohistidine phosphatase 1	93.2713	0.126814	0.114142	1.11348	0.265504	0.99969	0.0990115	0.884256	111.268	97.9937	103.356	60.4674
ENSCSAG00000001634	ZNF749		18.7338	0.126681	0.082321	1.55613	0.119676	0.99969	0.0211396	0.619937	28.6117	20.8128	11.1136	14.397
ENSCSAG00000015546	FIGN	fidgetin, microtubule severing factor	47.5936	0.12658	0.104121	1.21573	0.224088	0.99969	0.0716782	0.846878	50.8652	60.7041	28.8953	49.9096
ENSCSAG00000003267	ARHGAP42	Rho GTPase activating protein 42	68.3376	0.126514	0.111845	1.13114	0.257997	0.99969	0.0937712	0.878574	63.5815	91.0561	61.1248	57.588
ENSCSAG00000011031	SLC16A2	solute carrier family 16 member 2	34.0175	0.12649	0.099198	1.27935	0.200775	0.99969	0.0580381	0.81746	42.3877	39.0241	27.784	26.8744
ENSCSAG00000010256	SGSM1	small G protein signaling modulator 1	50.5657	0.126426	0.10803	1.17215	0.241139	0.99969	0.08246	0.86418	58.2831	58.1025	45.5657	40.3116
ENSCSAG00000017808	SS18	SS18 subunit of BAF chromatin remodeling complex	127.169	0.126378	0.118719	1.06412	0.287272	0.99969	0.114899	0.898639	131.402	147.424	108.913	120.935
ENSCSAG00000018036	IFT22	intraflagellar transport 22	131.82	0.126355	0.118579	1.06622	0.286326	0.99969	0.114187	0.898071	163.193	126.611	115.581	121.895
ENSCSAG00000009170	ZNF503	zinc finger protein 503	78.4658	0.126322	0.114205	1.10582	0.268803	0.99969	0.101353	0.886628	87.9544	88.4545	57.7907	79.6634
ENSCSAG00000017770	SLC25A30	solute carrier family 25 member 30	51.0848	0.126241	0.106863	1.18497	0.236028	0.99969	0.0791582	0.859311	68.88	49.4305	46.6771	39.3518
ENSCSAG00000002307	RPTOR	regulatory associated protein of MTOR complex 1	119.411	0.126224	0.118457	1.06524	0.286765	0.99969	0.114518	0.898335	127.163	135.283	100.022	115.176
ENSCSAG00000017795	CPSF4	cleavage and polyadenylation specific factor 4	217.187	0.126145	0.119225	1.05884	0.289675	0.99969	0.116715	0.900058	268.102	203.792	214.492	182.362
ENSCSAG00000001074	ZSCAN20	zinc finger and SCAN domain containing 20	15.8789	0.125971	0.0777509	1.64262	0.100462	0.99969	0.014949	0.535635	23.3132	19.9456	7.77952	12.4774
ENSCSAG00000016903	ZNF621		77.7144	0.125922	0.115043	1.0951	0.273471	0.99969	0.104708	0.88986	87.9544	85.8529	68.9043	68.1458
ENSCSAG00000011587	EPC1	enhancer of polycomb homolog 1	155.251	0.125815	0.119109	1.05595	0.290992	0.99969	0.117716	0.900823	149.417	189.05	143.365	139.171
ENSCSAG00000010958	TRPS1	transcriptional repressor GATA binding 1	232.957	0.125795	0.118402	1.0617	0.288373	0.99969	0.11573	0.899293	211.938	300.052	157.813	262.026
ENSCSAG00000011311	NDUFB1		241.909	0.125781	0.118991	1.05768	0.290202	0.99969	0.117115	0.900365	283.997	239.348	245.61	198.679
ENSCSAG00000001088			59.7755	0.125742	0.111144	1.13266	0.257357	0.99969	0.0933298	0.878069	69.9397	65.9073	53.3453	49.9096
ENSCSAG00000003738	GOSR2	golgi SNAP receptor complex member 2	64.0225	0.125463	0.111792	1.12383	0.261083	0.99969	0.0959104	0.880959	72.0591	72.8449	62.2361	48.9498
ENSCSAG00000007444	NAA35	N-alpha-acetyltransferase 35, NatC auxiliary subunit	103.644	0.125163	0.117717	1.06377	0.287431	0.99969	0.115019	0.898734	117.626	111.002	96.6883	89.2614
ENSCSAG00000015277	ZFP64	ZFP64 zinc finger protein	72.135	0.125042	0.113894	1.09864	0.271926	0.99969	0.103593	0.888806	85.8351	76.3137	61.1248	65.2664
ENSCSAG00000013761	RP2	RP2 activator of ARL3 GTPase	75.4266	0.124965	0.114529	1.09126	0.275158	0.99969	0.105932	0.890993	79.4769	89.3217	66.6816	66.2262
ENSCSAG00000015401	TACC1		68.2957	0.124953	0.112926	1.1079	0.267905	0.99969	0.100713	0.885989	78.4172	75.4465	65.5702	53.7488
ENSCSAG00000006199	PRKAG1	protein kinase AMP-activated non-catalytic subunit gamma 1	60.8712	0.124815	0.111328	1.12264	0.261592	0.99969	0.0962651	0.881346	73.1188	65.0401	54.4566	50.8694
ENSCSAG00000000754	PER3	period circadian regulator 3	141.057	0.12477	0.118982	1.04817	0.294561	0.99969	0.120445	0.902852	145.178	163.034	117.804	138.211
ENSCSAG00000007062	PRMT2	protein arginine methyltransferase 2	105.282	0.124752	0.117858	1.05857	0.289797	0.99969	0.116808	0.900129	117.626	114.471	91.1315	97.8996
ENSCSAG00000008433	VPS28		240.703	0.12468	0.118739	1.05044	0.293518	0.99969	0.119644	0.902266	282.938	236.746	230.051	213.076
ENSCSAG00000004123	TSPAN5	tetraspanin 5	94.7147	0.124653	0.11572	1.07639	0.281751	0.99969	0.110773	0.895259	97.4917	113.603	68.9043	98.8594
ENSCSAG00000014435	PSMA3	proteasome 20S subunit alpha 3	137.453	0.124522	0.119042	1.04604	0.295543	0.99969	0.121201	0.903399	153.655	146.557	120.027	129.573
ENSCSAG00000001533	STXBP3	syntaxin binding protein 3	197.807	0.124235	0.119038	1.04354	0.2967	0.99969	0.122093	0.904038	217.237	210.73	172.261	191
ENSCSAG00000014909	TMEM167A		537.229	0.124204	0.114251	1.08695	0.277057	0.99969	0.107317	0.892249	553.159	593.166	475.662	526.93
ENSCSAG00000014108	MPP6	membrane palmitoylated protein 6	69.5761	0.124104	0.113348	1.09608	0.273042	0.99969	0.104398	0.889569	83.7157	72.8449	62.2361	59.5076
ENSCSAG00000002564	DDX6	DEAD-box helicase 6	329.028	0.124049	0.116794	1.06212	0.288181	0.99969	0.115585	0.899179	347.579	357.287	315.626	295.619
ENSCSAG00000011117	INVS	inversin	99.4995	0.123911	0.116884	1.05982	0.289225	0.99969	0.116374	0.899795	111.268	109.267	76.6838	100.779
ENSCSAG00000009071	ZNF346	zinc finger protein 346	50.7039	0.12386	0.106089	1.17173	0.241307	0.99969	0.0825697	0.864336	68.88	48.5633	48.8998	36.4724
ENSCSAG00000003558	FAM171A2		94.7713	0.123849	0.116887	1.05973	0.289268	0.99969	0.116406	0.89982	98.5514	111.002	88.9088	80.6232
ENSCSAG00000015951	PPWD1		54.6273	0.123848	0.106	1.16818	0.242736	0.99969	0.0835042	0.86565	45.5668	80.6497	43.343	48.9498
ENSCSAG00000013225	SNX16	sorting nexin 16	173.088	0.123789	0.118305	1.0455	0.295792	0.99969	0.121393	0.903538	147.297	232.41	138.92	173.724
ENSCSAG00000006956	DNM2		274.903	0.12377	0.117684	1.05171	0.292934	0.99969	0.119197	0.901935	294.594	295.716	257.835	251.468
ENSCSAG00000003484	TMEM101	transmembrane protein 101	79.7555	0.123627	0.112698	1.09927	0.271651	0.99969	0.103394	0.888616	90.0738	89.3217	87.7974	51.8292
ENSCSAG00000016049	DPYSL2	dihydropyrimidinase like 2	268.983	0.123555	0.118467	1.0427	0.297086	0.99969	0.122392	0.90425	259.625	319.13	253.39	243.789
ENSCSAG00000003900	ATP6V0D1		55.4565	0.123388	0.109716	1.12504	0.260573	0.99969	0.0955552	0.88057	61.4621	65.0401	44.4544	50.8694
ENSCSAG00000003623	METAP2		179.459	0.123376	0.119238	1.03426	0.301013	0.99969	0.125446	0.906363	186.506	202.925	148.922	179.483
ENSCSAG00000005111	HABP2	hyaluronan binding protein 2	304.8	0.123216	0.117117	1.05206	0.292772	0.99969	0.119074	0.901843	326.385	326.935	285.619	280.262
ENSCSAG00000007425	BLOC1S5	biogenesis of lysosomal organelles complex 1 subunit 5	67.1299	0.123186	0.113045	1.09049	0.275496	0.99969	0.106177	0.891218	77.3575	73.7121	58.9021	58.5478
ENSCSAG00000015061	ANXA4	annexin A4	722.879	0.123094	0.114119	1.07846	0.280827	0.99969	0.110089	0.894676	701.516	839.451	641.254	709.292
ENSCSAG00000008264	MAPK9	mitogen-activated protein kinase 9	216.525	0.12281	0.118843	1.03317	0.301525	0.99969	0.125847	0.906633	233.132	234.144	186.708	212.116
ENSCSAG00000008123	LDAH	lipid droplet associated hydrolase	85.1817	0.12268	0.115332	1.06445	0.287124	0.99969	0.114788	0.89855	105.969	84.1185	70.0157	80.6232
ENSCSAG00000008814	SNAP23	synaptosome associated protein 23	142.368	0.122575	0.118395	1.03476	0.300783	0.99969	0.125266	0.906241	154.715	157.831	103.356	153.568
ENSCSAG00000012573	DNMT3B		46.1088	0.122542	0.10562	1.16111	0.245597	0.99969	0.0853894	0.868225	54.0443	52.8993	33.3408	44.1508
ENSCSAG00000010388	EVL		190.929	0.122537	0.119121	1.02848	0.303724	0.99969	0.127574	0.90778	206.64	206.394	164.481	186.201
ENSCSAG00000011292	DMXL2	Dmx like 2	172.003	0.122529	0.118894	1.02977	0.303116	0.99969	0.127095	0.907465	156.834	218.535	138.92	173.724
ENSCSAG00000010316	CCNG1	cyclin-G1	587.254	0.122511	0.112915	1.08495	0.277944	0.99969	0.107966	0.892827	627.338	622.651	542.343	556.684
ENSCSAG00000017778		GPALPP motifs containing 1	32.2689	0.122482	0.0939681	1.30551	0.19172	0.99969	0.0530923	0.803792	32.8505	45.9617	16.6704	33.593
ENSCSAG00000002858	DIXDC1	DIX domain containing 1	143.232	0.122478	0.119024	1.02856	0.303685	0.99969	0.127543	0.90776	143.058	169.104	124.472	136.292
ENSCSAG00000007420	RTKN2	rhotekin 2	35.3891	0.122467	0.0945067	1.29752	0.194453	0.99969	0.0545642	0.808069	29.6714	56.3681	20.0045	35.5126
ENSCSAG00000011014	RLIM		91.6817	0.122386	0.116765	1.0486	0.294362	0.99969	0.120292	0.902741	104.91	97.9937	82.2406	81.583
ENSCSAG00000015886	DIPK1B	divergent protein kinase domain 1B	135.263	0.122295	0.118848	1.02969	0.303155	0.99969	0.127126	0.907486	155.775	139.619	133.363	112.297
ENSCSAG00000013012	SERAC1	serine active site containing 1	105.129	0.122286	0.117647	1.03954	0.298554	0.99969	0.12353	0.905048	108.089	123.143	100.022	89.2614
ENSCSAG00000016529	CCDC93	coiled-coil domain containing 93	81.018	0.122164	0.113267	1.07952	0.280354	0.99969	0.10974	0.894377	107.029	75.4465	60.0134	81.583
ENSCSAG00000005078	CCDC186	coiled-coil domain containing 186	55.5561	0.122063	0.109789	1.11304	0.265689	0.99969	0.0991422	0.884391	66.7606	59.8369	46.6771	48.9498
ENSCSAG00000004554	GPRC5C	G protein-coupled receptor class C group 5 member C	144.707	0.121891	0.119013	1.02483	0.305443	0.99969	0.12893	0.908662	165.312	150.026	144.477	119.015
ENSCSAG00000007493	ERGIC2	ERGIC and golgi 2	149.234	0.121806	0.119162	1.02211	0.306727	0.99969	0.129948	0.909312	152.596	171.706	141.143	131.493
ENSCSAG00000002167	DCXR	dicarbonyl and L-xylulose reductase	63.498	0.121791	0.108457	1.12705	0.25972	0.99969	0.094963	0.879914	89.0141	56.3681	64.4589	44.1508
ENSCSAG00000011349	DCP1B	decapping mRNA 1B	65.6867	0.121778	0.111857	1.08824	0.276491	0.99969	0.106903	0.891877	66.7606	81.5169	51.1225	63.3468
ENSCSAG00000009297	CNTLN	centlein	166.813	0.121748	0.119228	1.02088	0.30731	0.99969	0.13041	0.909605	163.193	198.589	156.702	148.769
ENSCSAG00000017407	ZNF2		27.1973	0.121724	0.0881722	1.38985	0.164573	0.99969	0.0394816	0.752868	21.1938	46.8289	24.4499	16.3166
ENSCSAG00000005384	CNNM2	cyclin and CBS domain divalent metal cation transport mediator 2	50.9539	0.121695	0.107842	1.13004	0.258459	0.99969	0.0940902	0.878935	55.104	61.5713	47.7885	39.3518
ENSCSAG00000004621	ZBED5		130.524	0.121609	0.118633	1.02451	0.305593	0.99969	0.129049	0.908738	129.282	156.096	110.025	126.694
ENSCSAG00000009472	MLLT3		104.916	0.121522	0.116209	1.04548	0.295802	0.99969	0.1214	0.903543	122.924	110.135	73.3497	113.256
ENSCSAG00000017007	CHD2	chromodomain helicase DNA binding protein 2	240.118	0.121203	0.118593	1.02178	0.306886	0.99969	0.130074	0.909392	258.565	258.426	204.49	238.99
ENSCSAG00000015908		splicing regulatory glutamic acid and lysine rich protein 1	231.816	0.121189	0.118523	1.02231	0.306634	0.99969	0.129874	0.909266	243.729	254.957	207.824	220.754
ENSCSAG00000002245	ARL16		24.9136	0.12118	0.0909882	1.33798	0.180904	0.99969	0.0474486	0.785461	28.6117	32.9536	18.8931	19.196
ENSCSAG00000001757	PDZK1	PDZ domain containing 1	28.744	0.121162	0.0905689	1.3461	0.178269	0.99969	0.0461177	0.780628	45.5668	26.016	15.559	27.8342
ENSCSAG00000005698	ABCC2		18.5106	0.121053	0.0823514	1.48467	0.137632	0.99969	0.027835	0.682314	21.1938	26.8832	14.4477	11.5176
ENSCSAG00000000726	SMIM1	small integral membrane protein 1 (Vel blood group)	29.1151	0.12103	0.0936052	1.30074	0.193347	0.99969	0.0539661	0.806354	43.4474	27.7504	22.2272	23.0352
ENSCSAG00000015562	MFSD4B	major facilitator superfamily domain containing 4B	41.6198	0.120947	0.103591	1.17089	0.241644	0.99969	0.0827897	0.864647	51.9249	45.0945	37.7862	31.6734
ENSCSAG00000016949	FDFT1	farnesyl-diphosphate farnesyltransferase 1	52.8257	0.120858	0.108357	1.11578	0.264514	0.99969	0.0983134	0.88353	52.9846	67.6417	45.5657	45.1106
ENSCSAG00000008809		ubiquitin B	1018.18	0.120779	0.110028	1.09777	0.272307	0.99969	0.103867	0.889066	1112.68	1046.71	974.662	938.685
ENSCSAG00000006872	SCG5	secretogranin V	380.307	0.120661	0.118403	1.01868	0.308356	0.99969	0.131243	0.910127	381.489	436.202	295.622	407.915
ENSCSAG00000005601	BST2	bone marrow stromal cell antigen 2	25.1717	0.120434	0.0908695	1.33408	0.182178	0.99969	0.0480981	0.787743	31.7908	30.352	22.2272	16.3166
ENSCSAG00000014683	ETFA	electron transfer flavoprotein subunit alpha	229.129	0.120412	0.118744	1.01435	0.310415	0.99969	0.132888	0.911141	256.446	236.746	225.606	197.719
ENSCSAG00000016702	ITGA1	integrin subunit alpha 1	358.123	0.120357	0.117775	1.02155	0.306992	0.99969	0.130158	0.909445	339.101	428.397	315.626	349.367
ENSCSAG00000012961	CDC25B		224.195	0.120272	0.118707	1.01341	0.310867	0.99969	0.13325	0.911361	250.087	232.41	215.604	198.679
ENSCSAG00000018332	THOC2	THO complex 2	126.015	0.120077	0.118611	1.01213	0.311475	0.99969	0.133739	0.911656	125.044	150.026	116.693	112.297
ENSCSAG00000001343	ALG6	ALG6 alpha-1,3-glucosyltransferase	44.8687	0.120061	0.104708	1.14689	0.251429	0.99969	0.0892885	0.87325	47.6861	56.3681	32.2294	43.191
ENSCSAG00000012605	NOL4L		39.8607	0.119971	0.102705	1.1715	0.241398	0.99969	0.0826289	0.86442	49.8055	43.3601	35.5635	30.7136
ENSCSAG00000015902	RGS12		163.894	0.119959	0.119201	1.00697	0.313951	0.99969	0.135734	0.912841	186.506	169.104	165.593	134.372
ENSCSAG00000009137	MPDZ	multiple PDZ domain crumbs cell polarity complex component	150.681	0.119928	0.11883	1.00866	0.31314	0.99969	0.135079	0.912456	158.954	169.971	114.47	159.327
ENSCSAG00000016917	LYSMD4	LysM domain containing 4	27.6241	0.119812	0.0936747	1.28378	0.199219	0.99969	0.0571737	0.81521	30.7311	36.4225	22.2272	21.1156
ENSCSAG00000012243	METRN		82.1545	0.119663	0.109757	1.09439	0.273784	0.99969	0.104935	0.890071	115.506	71.1105	91.1315	50.8694
ENSCSAG00000015501	COBLL1		252.682	0.119656	0.10152	1.18294	0.236834	0.99969	0.0796747	0.860096	247.968	345.146	155.59	262.026
ENSCSAG00000017204	FRYL	FRY like transcription coactivator	219.339	0.119607	0.118993	1.00473	0.315027	0.99969	0.136605	0.913349	220.416	252.356	186.708	217.875
ENSCSAG00000001350	RAVER2		101.801	0.119593	0.117145	1.02045	0.307517	0.99969	0.130575	0.909709	109.148	115.338	80.0179	102.699
ENSCSAG00000002713	TCF25	transcription factor 25	177.193	0.119587	0.119234	1.00338	0.315676	0.99969	0.137132	0.913653	206.64	176.909	167.815	157.407
ENSCSAG00000010831			92.0758	0.119559	0.116275	1.0277	0.304093	0.99969	0.127864	0.907971	95.3723	108.4	73.3497	91.181
ENSCSAG00000005148	SUGP1		30.4687	0.119472	0.0961901	1.24668	0.212515	0.99969	0.064745	0.833216	34.9698	38.1569	26.6726	22.0754
ENSCSAG00000016111	MAN2B2		57.8434	0.11945	0.109313	1.09235	0.274679	0.99969	0.105583	0.890673	61.4621	70.2433	41.1203	58.5478
ENSCSAG00000003314	NUP37	nucleoporin 37	86.3399	0.119232	0.115866	1.03005	0.302989	0.99969	0.126995	0.907399	103.85	87.5873	80.0179	73.9046
ENSCSAG00000018009			65.6215	0.119008	0.112286	1.05974	0.289263	0.99969	0.116403	0.899817	66.7606	80.6497	55.568	59.5076
ENSCSAG00000014717	LGALSL	galectin like	118.924	0.118984	0.11805	1.00884	0.313052	0.99969	0.135008	0.912414	147.297	113.603	111.136	103.658
ENSCSAG00000006292	SLFN12	schlafen family member 12	27.748	0.118797	0.0935848	1.27527	0.202215	0.99969	0.0588429	0.819506	31.7908	35.5553	24.4499	19.196
ENSCSAG00000000976	DHDDS		11.1998	0.118769	0.0687883	1.77082	0.0765899	0.99969	0.00870167	0.411026	15.8954	16.4768	6.66816	5.7588
ENSCSAG00000012900	NBN	nibrin	113.154	0.118761	0.117817	1.00742	0.313735	0.99969	0.13556	0.912739	116.566	131.815	90.0201	114.216
ENSCSAG00000011974	ANKRD26	ankyrin repeat domain 26	136.604	0.118575	0.119005	0.996642	0.318938	0.99969	0.139791	0.915156	156.834	140.487	123.361	125.734
ENSCSAG00000016432	STMN3	stathmin 3	63.0091	0.118537	0.108264	1.09868	0.271906	0.99969	0.103578	0.888792	91.1335	52.8993	60.0134	47.99
ENSCSAG00000003180	TMEM192		17.1082	0.118406	0.0803292	1.48887	0.136521	0.99969	0.0273959	0.678858	23.3132	21.68	10.0022	13.4372
ENSCSAG00000007642	TM7SF2		183.234	0.118234	0.119228	0.991994	0.3212	0.99969	0.141647	0.916175	197.103	198.589	185.597	151.648
ENSCSAG00000013997	CHD6	chromodomain helicase DNA binding protein 6	322.068	0.118167	0.117435	1.00602	0.314404	0.99969	0.136101	0.913056	343.34	346.013	274.506	324.413
ENSCSAG00000004234	FAM13A	family with sequence similarity 13 member A	130.464	0.118079	0.118659	0.995395	0.319544	0.99969	0.140287	0.915431	155.775	129.213	111.136	125.734
ENSCSAG00000007656	ZNF561		202.1	0.118044	0.118786	0.993006	0.320707	0.99969	0.141241	0.915954	196.043	244.551	142.254	225.553
ENSCSAG00000010891	CXCL12		99.6435	0.117951	0.117395	1.00458	0.315098	0.99969	0.136663	0.913382	108.089	111.002	84.4633	95.0202
ENSCSAG00000007783	GMNN	geminin DNA replication inhibitor	117.112	0.117834	0.118025	0.999211	0.317693	0.99969	0.138773	0.914587	131.402	124.877	120.027	92.1408
ENSCSAG00000014901	MED27	mediator complex subunit 27	81.3236	0.117831	0.115574	1.01974	0.307853	0.99969	0.130842	0.909877	90.0738	90.1889	71.127	73.9046
ENSCSAG00000013617	SCAI	suppressor of cancer cell invasion	65.8918	0.117759	0.110741	1.06279	0.287875	0.99969	0.115354	0.898998	70.9994	78.0481	44.4544	70.0654
ENSCSAG00000010842	NIF3L1	NGG1 interacting factor 3 like 1	76.2267	0.117736	0.114472	1.02876	0.303592	0.99969	0.12747	0.907712	78.4172	91.0561	71.127	64.3066
ENSCSAG00000007602	PPFIBP1	PPFIA binding protein 1	151.66	0.117735	0.118567	0.99228	0.321061	0.99969	0.141533	0.916113	134.581	195.987	131.14	144.93
ENSCSAG00000003562	JADE1	jade family PHD finger 1	370.659	0.117731	0.117197	1.00429	0.315239	0.99969	0.136777	0.913448	386.788	405.85	308.958	381.041
ENSCSAG00000017014	CCDC28A		13.9069	0.117617	0.0738489	1.61705	0.105869	0.99969	0.0165875	0.561384	14.8357	23.4144	7.77952	9.598
ENSCSAG00000014618	NUAK2	NUAK family kinase 2	400.471	0.117438	0.116562	1.00725	0.313816	0.99969	0.135625	0.912777	393.146	461.351	356.746	390.639
ENSCSAG00000002303	SUDS3		47.3974	0.117396	0.106261	1.10738	0.268131	0.99969	0.100874	0.88615	60.4025	48.5633	42.2317	38.392
ENSCSAG00000008372	WDCP	WD repeat and coiled coil containing	32.3035	0.117339	0.0969174	1.21586	0.224037	0.99969	0.0716467	0.846821	37.0892	39.8913	31.1181	21.1156
ENSCSAG00000007580	MYLIP	myosin regulatory light chain interacting protein	70.0196	0.117329	0.11317	1.03795	0.299295	0.99969	0.124106	0.905447	78.4172	78.0481	68.9043	54.7086
ENSCSAG00000017475	EFNB2	ephrin B2	157.715	0.117328	0.11923	0.98434	0.324948	0.99969	0.144745	0.917822	174.849	166.503	152.256	137.251
ENSCSAG00000004603		cocaine esterase-like	12.3918	0.117304	0.0708215	1.69599	0.0898872	0.99969	0.0119814	0.480383	21.1938	13.8752	7.77952	6.7186
ENSCSAG00000011328	EFNB3	ephrin B3	75.5872	0.117151	0.114636	1.0226	0.306497	0.99969	0.129765	0.909196	84.7754	83.2513	70.0157	64.3066
ENSCSAG00000009328			102.397	0.1171	0.114952	1.02091	0.307297	0.99969	0.130401	0.909599	129.282	97.9937	112.247	70.0654
ENSCSAG00000010802		LSM8 homolog, U6 small nuclear RNA associated	31.7491	0.117091	0.0972013	1.20806	0.227022	0.99969	0.0734857	0.850079	40.2683	35.5553	23.3386	27.8342
ENSCSAG00000011980	ADAM10	ADAM metallopeptidase domain 10	213.571	0.117013	0.118754	0.985309	0.324472	0.99969	0.14435	0.917615	229.953	228.941	196.711	198.679
ENSCSAG00000001726	ZNF784	zinc finger protein 784	42.8394	0.116892	0.103288	1.13582	0.256031	0.99969	0.0924189	0.877015	56.1637	43.3601	41.1203	30.7136
ENSCSAG00000011186	SLC2A11	solute carrier family 2 member 11	42.6974	0.116732	0.104517	1.11888	0.26319	0.99969	0.0973828	0.882548	51.9249	46.8289	35.5635	36.4724
ENSCSAG00000013521	FBXO5	F-box protein 5	56.5444	0.116597	0.109295	1.0667	0.286108	0.99969	0.114024	0.89794	62.5218	65.9073	41.1203	56.6282
ENSCSAG00000009261		two pore segment channel 2	46.9485	0.116553	0.104531	1.11922	0.263045	0.99969	0.0972809	0.882439	62.5218	45.9617	46.6771	32.6332
ENSCSAG00000000995	WASF2	WASP family member 2	74.4864	0.116476	0.112647	1.03365	0.3013	0.99969	0.125671	0.906515	84.7754	82.3841	51.1225	79.6634
ENSCSAG00000012981	INTS14	integrator complex subunit 14	75.0294	0.116353	0.114247	1.01844	0.308468	0.99969	0.131332	0.910182	84.7754	82.3841	60.0134	72.9448
ENSCSAG00000006775	PALB2		63.5086	0.116348	0.112142	1.03849	0.299041	0.99969	0.123909	0.905311	73.1188	69.3761	57.7907	53.7488
ENSCSAG00000002950	MEIS3	Meis homeobox 3	47.7102	0.11625	0.106265	1.09472	0.273639	0.99969	0.10483	0.889973	47.6861	61.5713	42.2317	39.3518
ENSCSAG00000015346	FAM210B	family with sequence similarity 210 member B	84.172	0.116248	0.115807	1.00396	0.315398	0.99969	0.136906	0.913523	87.9544	97.9937	77.7952	72.9448
ENSCSAG00000007534	LPIN1	lipin 1	86.683	0.116238	0.114696	1.01256	0.311268	0.99969	0.133573	0.911556	80.5366	111.869	68.9043	85.4222
ENSCSAG00000004105		chromosome unknown C19orf33 homolog	30.8049	0.116218	0.0966274	1.20714	0.227377	0.99969	0.0737052	0.850459	37.0892	36.4225	26.6726	23.0352
ENSCSAG00000019452	SOCS5		80.9757	0.116072	0.115095	1.00847	0.313227	0.99969	0.13515	0.912497	92.1932	87.5873	64.4589	79.6634
ENSCSAG00000017926	FRY	FRY microtubule binding protein	356.52	0.115946	0.118648	0.97679	0.328673	0.99969	0.147852	0.919409	350.758	414.522	277.84	382.96
ENSCSAG00000000978	RPS6KA1	ribosomal protein S6 kinase A1	119.742	0.11592	0.118379	0.979846	0.327162	0.99969	0.146589	0.918771	134.581	126.611	118.915	98.8594
ENSCSAG00000015208	NEMF	nuclear export mediator factor	118.281	0.115889	0.118451	0.978182	0.327984	0.99969	0.147276	0.919119	120.805	137.018	107.802	107.498
ENSCSAG00000000735	RNF207		15.6553	0.115832	0.0771207	1.52573	0.127077	0.99969	0.0237938	0.647384	25.4326	16.4768	11.1136	9.598
ENSCSAG00000007464	PARP14	poly(ADP-ribose) polymerase family member 14	59.9761	0.115704	0.109958	1.05306	0.292314	0.99969	0.118724	0.901582	75.2381	60.7041	44.4544	59.5076
ENSCSAG00000016537	BMP1	bone morphogenetic protein 1	116.837	0.115624	0.118431	0.976669	0.328733	0.99969	0.147903	0.919434	133.521	121.408	107.802	104.618
ENSCSAG00000005049	CRACD		32.3274	0.115567	0.0966125	1.20249	0.229173	0.99969	0.0748233	0.852364	42.3877	34.6881	31.1181	21.1156
ENSCSAG00000005703	TMEM38A		84.1313	0.115563	0.115483	1.0018	0.316441	0.99969	0.137753	0.914009	98.5514	87.5873	82.2406	68.1458
ENSCSAG00000006827	PUS7L		50.5224	0.115441	0.106592	1.08284	0.278877	0.99969	0.108652	0.893431	55.104	60.7041	34.4521	51.8292
ENSCSAG00000004750	GINS3	GINS complex subunit 3	27.0744	0.115331	0.0928484	1.24835	0.211902	0.99969	0.064387	0.832444	31.7908	33.8208	24.4499	18.2362
ENSCSAG00000001007			38.1419	0.115303	0.101728	1.13539	0.256211	0.99969	0.0925427	0.87716	46.6265	42.4929	28.8953	34.5528
ENSCSAG00000011234	GOLGA5	golgin A5	79.4314	0.115237	0.115126	1.00176	0.316458	0.99969	0.137767	0.914017	90.0738	85.8529	75.5725	66.2262
ENSCSAG00000017550	COX19	COX19, cytochrome c oxidase assembly factor	63.6955	0.115213	0.108948	1.06085	0.28876	0.99969	0.116022	0.899521	90.0738	54.6337	61.1248	48.9498
ENSCSAG00000014623	FAM172A		30.8428	0.115045	0.0964507	1.19751	0.231106	0.99969	0.0760346	0.854373	37.0892	36.4225	27.784	22.0754
ENSCSAG00000012910	UBE2E3	ubiquitin conjugating enzyme E2 E3	366.063	0.115043	0.118046	0.97417	0.329972	0.99969	0.148942	0.919952	359.236	424.061	298.956	382.001
ENSCSAG00000001288	CZIB	CXXC motif containing zinc binding protein	42.8592	0.114998	0.104321	1.10509	0.269122	0.99969	0.101581	0.886853	52.9846	45.9617	38.8976	33.593
ENSCSAG00000018745	MOCS3	molybdenum cofactor synthesis 3	48.3368	0.114904	0.10407	1.10884	0.267499	0.99969	0.100425	0.885699	65.7009	45.9617	50.0112	31.6734
ENSCSAG00000005387	XYLT2		69.3484	0.114875	0.113512	1.01264	0.31123	0.99969	0.133542	0.911537	77.3575	77.1809	63.3475	59.5076
ENSCSAG00000006177	YPEL3	yippee like 3	13.7518	0.114744	0.0744073	1.56735	0.117034	0.99969	0.0202277	0.609495	20.1342	17.344	8.89088	8.6382
ENSCSAG00000011951	ADAMTS9		945.568	0.114688	0.110574	1.03715	0.299667	0.99969	0.124396	0.905647	992.932	1007.69	853.524	928.127
ENSCSAG00000013648	ANKRD16	ankyrin repeat domain 16	29.9521	0.114603	0.0952429	1.2066	0.227587	0.99969	0.0738355	0.850684	38.1489	33.8208	20.0045	27.8342
ENSCSAG00000000810	VPS13D	vacuolar protein sorting 13 homolog D	223.403	0.114403	0.118818	0.962549	0.335774	0.99969	0.153851	0.922307	222.535	256.692	202.267	212.116
ENSCSAG00000015553	CENPF	centromere protein F	575.778	0.114344	0.11306	1.01133	0.311856	0.99969	0.134045	0.91184	604.025	616.58	547.9	534.609
ENSCSAG00000004614	CDH16	cadherin 16	66.48	0.114248	0.112595	1.01472	0.310237	0.99969	0.132746	0.911054	67.8203	80.6497	58.9021	58.5478
ENSCSAG00000008126	TXNRD3	thioredoxin reductase 3	117.108	0.114194	0.118363	0.965131	0.334479	0.99969	0.15275	0.921791	136.7	118.807	104.468	108.457
ENSCSAG00000013840	SMYD4		43.5147	0.114069	0.10501	1.08747	0.276828	0.99969	0.107149	0.892098	49.8055	50.2977	35.5635	38.392
ENSCSAG00000019087	H2BC11	histone H2B type 1-J	387.121	0.114008	0.116007	0.982757	0.325727	0.99969	0.145393	0.918157	427.056	397.178	348.967	375.282
ENSCSAG00000018427			22.8824	0.113956	0.0872009	1.31257	0.189329	0.99969	0.0518199	0.799938	28.6117	28.6176	12.225	22.0754
ENSCSAG00000010606			70.5601	0.113925	0.111045	1.02503	0.305347	0.99969	0.128855	0.908613	72.0591	86.7201	46.6771	76.784
ENSCSAG00000013184	FBXW2	F-box and WD repeat domain containing 2	76.2997	0.113819	0.113659	1.00302	0.315849	0.99969	0.137272	0.913734	89.0141	80.6497	78.9065	56.6282
ENSCSAG00000015512	PCK1	phosphoenolpyruvate carboxykinase 1	14.3529	0.113741	0.0749415	1.54264	0.122919	0.99969	0.0222842	0.63228	23.3132	15.6096	8.89088	9.598
ENSCSAG00000000935	SRSF10	serine and arginine rich splicing factor 10	44.4453	0.113664	0.104399	1.08892	0.276187	0.99969	0.106681	0.891676	48.7458	53.7665	31.1181	44.1508
ENSCSAG00000019257	MFSD5	major facilitator superfamily domain containing 5	55.655	0.113647	0.109805	1.03628	0.30007	0.99969	0.12471	0.905862	66.7606	58.9697	48.8998	47.99
ENSCSAG00000014868	PGGT1B	protein geranylgeranyltransferase type I subunit beta	50.9446	0.113583	0.107063	1.06102	0.288679	0.99969	0.115961	0.899473	58.2831	58.1025	35.5635	51.8292
ENSCSAG00000006988			196.55	0.113552	0.119201	0.952166	0.341013	0.99969	0.15834	0.924343	201.342	222.004	162.259	200.598
ENSCSAG00000017592			40.2031	0.113545	0.103139	1.10205	0.270441	0.99969	0.102525	0.887778	44.5071	48.5633	32.2294	35.5126
ENSCSAG00000010630	LRRC75B		82.2945	0.113543	0.1148	0.988533	0.322892	0.99969	0.143042	0.916924	87.9544	94.5249	62.2361	84.4624
ENSCSAG00000015878	PLXNB1	plexin B1	72.797	0.113541	0.113859	0.996964	0.318782	0.99969	0.139663	0.915085	74.1785	87.5873	62.2361	67.186
ENSCSAG00000009434	OPN3	opsin 3	109.55	0.113505	0.117796	0.96306	0.335517	0.99969	0.153632	0.922205	110.208	129.213	92.2428	106.538
ENSCSAG00000005988	APPBP2	amyloid beta precursor protein binding protein 2	519.491	0.113423	0.116297	0.975015	0.329553	0.99969	0.14859	0.919777	495.936	609.642	451.212	521.172
ENSCSAG00000000679	ACAP3	ArfGAP with coiled-coil, ankyrin repeat and PH domains 3	40.7775	0.1134	0.102649	1.10839	0.267695	0.99969	0.100564	0.885839	52.9846	41.6257	37.7862	30.7136
ENSCSAG00000017206	CDH6	cadherin 6	4557.46	0.113207	0.108147	1.04678	0.2952	0.99969	0.120936	0.903209	4513.23	5104.35	4060.91	4551.37
ENSCSAG00000011988	GPATCH2L	G-patch domain containing 2 like	66.0563	0.113207	0.111949	1.01081	0.312109	0.99969	0.134249	0.911962	69.9397	78.0481	50.0112	66.2262
ENSCSAG00000017796	ZNF789	zinc finger protein 789	28.0682	0.113067	0.0917288	1.24033	0.214854	0.99969	0.0661211	0.836118	30.7311	37.2897	28.8953	15.3568
ENSCSAG00000014134	UBE2T	ubiquitin conjugating enzyme E2 T	23.7147	0.113023	0.0888068	1.28005	0.200528	0.99969	0.0579006	0.817106	25.4326	32.9536	21.1158	15.3568
ENSCSAG00000009697	NPM1	nucleophosmin 1	70.9724	0.112989	0.113248	0.99727	0.318633	0.99969	0.139541	0.915017	73.1188	84.9857	56.6793	69.1056
ENSCSAG00000010291	SRSF3		268.585	0.112712	0.117941	0.955756	0.339196	0.99969	0.156777	0.923647	299.893	274.036	248.945	251.468
ENSCSAG00000011621	PDZD11	PDZ domain containing 11	51.7006	0.112503	0.10805	1.0426	0.297132	0.99969	0.122427	0.904275	64.6412	52.8993	42.2317	47.0302
ENSCSAG00000015750	LYPLAL1	lysophospholipase like 1	60.994	0.112454	0.109517	1.02612	0.304833	0.99969	0.128448	0.90835	55.104	82.3841	48.8998	57.588
ENSCSAG00000010698	GNE		107.25	0.112453	0.117414	0.957304	0.338414	0.99969	0.156106	0.923344	101.73	132.682	96.6883	97.8996
ENSCSAG00000014196	PLCD1		39.9831	0.112383	0.101171	1.11406	0.265254	0.99969	0.0988352	0.884074	56.1637	37.2897	30.0067	36.4724
ENSCSAG00000005996	ASIC1	acid sensing ion channel subunit 1	22.4605	0.112235	0.0876799	1.28739	0.197958	0.99969	0.0564779	0.813359	24.3729	31.2192	18.8931	15.3568
ENSCSAG00000017447	IRAK1BP1	interleukin 1 receptor associated kinase 1 binding protein 1	43.3943	0.112225	0.10233	1.09633	0.272936	0.99969	0.104321	0.889496	43.4474	57.2353	27.784	45.1106
ENSCSAG00000015849	WDSUB1	WD repeat, sterile alpha motif and U-box domain containing 1	160.812	0.112184	0.118866	0.943578	0.345385	0.99969	0.162127	0.92598	185.446	163.901	121.138	172.764
ENSCSAG00000006585	GET3	guided entry of tail-anchored proteins factor 3, ATPase	17.5382	0.112163	0.0788017	1.44626	0.148106	0.99969	0.0321378	0.712625	28.6117	17.344	15.559	8.6382
ENSCSAG00000007752	KALRN		69.7693	0.112153	0.112009	1.00085	0.316901	0.99969	0.138127	0.914222	77.3575	78.9153	48.8998	73.9046
ENSCSAG00000016027	SUSD4		28.4311	0.112076	0.0934604	1.2024	0.22921	0.99969	0.0748465	0.852403	27.552	40.7585	23.3386	22.0754
ENSCSAG00000004853	GALK1		62.1777	0.111995	0.109848	1.02153	0.307003	0.99969	0.130167	0.909451	67.8203	71.9777	66.6816	42.2312
ENSCSAG00000015251	PAIP2B	poly(A) binding protein interacting protein 2B	68.6686	0.111928	0.112503	0.996596	0.318961	0.99969	0.139809	0.915166	84.7754	68.5089	66.6816	54.7086
ENSCSAG00000002345	TBC1D16	TBC1 domain family member 16	73.1097	0.111801	0.111793	1.00193	0.316376	0.99969	0.1377	0.913979	100.671	63.3057	62.2361	66.2262
ENSCSAG00000009555	DENND3	DENN domain containing 3	39.2314	0.111776	0.100237	1.1198	0.262798	0.99969	0.0971078	0.882255	57.2234	34.6881	33.3408	31.6734
ENSCSAG00000001491	RWDD3		43.8165	0.111766	0.103331	1.08151	0.279471	0.99969	0.109089	0.893813	46.6265	54.6337	28.8953	45.1106
ENSCSAG00000001323	DAB1	DAB adaptor protein 1	62.3087	0.111737	0.111686	1.00044	0.3171	0.99969	0.138289	0.914314	65.7009	73.7121	52.2339	57.588
ENSCSAG00000004634	DYNC1LI2	dynein cytoplasmic 1 light intermediate chain 2	112.54	0.111696	0.11823	0.944685	0.34482	0.99969	0.161635	0.925771	116.566	128.346	104.468	100.779
ENSCSAG00000012597	EML4	EMAP like 4	168.392	0.111685	0.11924	0.936409	0.349063	0.99969	0.16534	0.927314	178.028	184.714	146.699	164.126
ENSCSAG00000005152	PDCD4	programmed cell death 4	273.171	0.111662	0.11783	0.947719	0.343272	0.99969	0.160292	0.925196	303.072	280.106	252.279	257.227
ENSCSAG00000001594	CAPZA1		154.512	0.111652	0.119104	0.93705	0.348733	0.99969	0.165051	0.927196	147.297	186.448	142.254	142.05
ENSCSAG00000016856	PRAG1	PEAK1 related, kinase-activating pseudokinase 1	27.6022	0.11163	0.0925973	1.20866	0.226792	0.99969	0.0733429	0.849831	33.9101	32.9536	16.6704	26.8744
ENSCSAG00000006242	CACNB3	calcium voltage-gated channel auxiliary subunit beta 3	88.2275	0.111584	0.11603	0.961222	0.33644	0.99969	0.154419	0.922571	90.0738	104.064	73.3497	85.4222
ENSCSAG00000008028	TTC32		21.8019	0.111505	0.0817999	1.37142	0.170244	0.99969	0.0421716	0.764926	15.8954	39.8913	12.225	19.196
ENSCSAG00000018107	ZMYM2	zinc finger MYM-type containing 2	307.48	0.111504	0.118093	0.943847	0.345248	0.99969	0.162007	0.925929	295.654	360.756	271.172	302.337
ENSCSAG00000017492	CEP192	centrosomal protein 192	281.487	0.111487	0.117578	0.948142	0.343057	0.99969	0.160106	0.925115	302.012	298.317	257.835	267.784
ENSCSAG00000010766	ATP7A	ATPase copper transporting alpha	124.912	0.111412	0.118074	0.942845	0.34576	0.99969	0.162453	0.926117	123.984	148.291	97.7996	129.573
ENSCSAG00000000123	MAGEH1	melanoma-associated antigen H1	8.51314	0.111395	0.0594862	1.96771	0.0491013	0.99969	0.003554	0.242265	19.0745	7.80481	3.33408	3.8392
ENSCSAG00000015184	PARD6B	par-6 family cell polarity regulator beta	386.444	0.111361	0.118946	0.935776	0.349389	0.99969	0.165627	0.92743	344.4	483.898	313.403	404.076
ENSCSAG00000000689	ANKRD65	ankyrin repeat domain 65	16.6933	0.111301	0.075545	1.50355	0.132698	0.99969	0.025909	0.666573	31.7908	13.008	13.3363	8.6382
ENSCSAG00000003257	GUCY1B1	guanylate cyclase 1 soluble subunit beta 1	115.69	0.111299	0.115653	0.961252	0.336426	0.99969	0.154406	0.922565	104.91	150.026	81.1293	126.694
ENSCSAG00000002003	THBS3	thrombospondin 3	66.0923	0.111213	0.111398	1.00047	0.317082	0.99969	0.138275	0.914306	84.7754	63.3057	64.4589	51.8292
ENSCSAG00000004822	ZNF507	zinc finger protein 507	117.669	0.111204	0.115428	0.962283	0.335907	0.99969	0.153965	0.92236	100.671	158.698	85.5747	125.734
ENSCSAG00000012885	DECR1	2,4-dienoyl-CoA reductase 1	77.3685	0.111197	0.114778	0.968613	0.332738	0.99969	0.151275	0.921089	82.656	88.4545	64.4589	73.9046
ENSCSAG00000007974	RECQL	RecQ like helicase	102.873	0.111194	0.117696	0.945114	0.344601	0.99969	0.161445	0.92569	114.447	110.135	96.6883	90.2212
ENSCSAG00000010243	WDR20	WD repeat domain 20	87.5982	0.111096	0.116039	0.957273	0.338429	0.99969	0.15612	0.92335	97.4917	95.3921	71.127	86.382
ENSCSAG00000011769	NDUFAF5	NADH:ubiquinone oxidoreductase complex assembly factor 5	50.3454	0.111029	0.106365	1.04702	0.295091	0.99969	0.120852	0.903148	63.5815	51.1649	51.1225	35.5126
ENSCSAG00000003796	CEP290	centrosomal protein 290	94.1305	0.111027	0.116733	0.951028	0.34159	0.99969	0.158838	0.924563	94.3126	111.869	87.7974	82.5428
ENSCSAG00000017941	B3GLCT	beta 3-glucosyltransferase	103.197	0.111013	0.117312	0.945963	0.344168	0.99969	0.161069	0.92553	112.327	113.603	82.2406	104.618
ENSCSAG00000017822		desmocollin 2	15.2285	0.111003	0.0763184	1.47273	0.140823	0.99969	0.0291152	0.69198	23.3132	17.344	7.77952	12.4774
ENSCSAG00000000945	SRRM1		96.8947	0.110944	0.115484	0.959712	0.3372	0.99969	0.155068	0.92287	92.1932	121.408	72.2384	101.739
ENSCSAG00000010325	CPNE1	RNA binding motif protein 12	633.964	0.11082	0.112561	0.984502	0.324869	0.99969	0.14468	0.917787	654.89	685.956	605.691	589.317
ENSCSAG00000016119	OGFR	opioid growth factor receptor	113.345	0.110818	0.117231	0.946566	0.34386	0.99969	0.160802	0.925415	144.118	104.064	111.136	94.0604
ENSCSAG00000013510	PIGF		68.5019	0.110775	0.108061	1.02469	0.305512	0.99969	0.128985	0.908697	78.4172	77.1809	37.7862	80.6232
ENSCSAG00000011794	OXR1		433.169	0.110722	0.117375	0.942992	0.345685	0.99969	0.162388	0.92609	425.996	496.906	356.746	453.026
ENSCSAG00000014951	HOOK3		98.412	0.110714	0.116528	0.95002	0.342102	0.99969	0.15928	0.924756	93.2529	122.275	95.5769	82.5428
ENSCSAG00000012558	PLXDC2		129.835	0.110648	0.117382	0.941729	0.346331	0.99969	0.162951	0.926327	126.103	157.831	93.3542	142.05
ENSCSAG00000012416	MAP4K3	mitogen-activated protein kinase kinase kinase kinase 3	133.05	0.110628	0.118227	0.934941	0.349819	0.99969	0.166004	0.927583	128.223	161.299	104.468	138.211
ENSCSAG00000016644	RALB	RAS like proto-oncogene B	87.8256	0.110602	0.11639	0.950442	0.341888	0.99969	0.159095	0.924675	97.4917	95.3921	77.7952	80.6232
ENSCSAG00000016946	NEIL2	nei like DNA glycosylase 2	36.562	0.11055	0.100786	1.09986	0.271392	0.99969	0.103208	0.888437	43.4474	41.6257	33.3408	27.8342
ENSCSAG00000008355	GET1		101.659	0.110528	0.116473	0.949503	0.342365	0.99969	0.159507	0.924855	128.223	95.3921	82.2406	100.779
ENSCSAG00000016056	EGFR	epidermal growth factor receptor	62.1134	0.110527	0.111689	0.990693	0.321836	0.99969	0.14217	0.916457	72.0591	66.7745	57.7907	51.8292
ENSCSAG00000002241	HGS	hepatocyte growth factor-regulated tyrosine kinase substrate	98.0222	0.110211	0.117272	0.940299	0.347064	0.99969	0.163591	0.926594	110.208	104.064	93.3542	84.4624
ENSCSAG00000003237	STAB2		32.8992	0.110178	0.0971097	1.13578	0.25605	0.99969	0.092432	0.877031	37.0892	40.7585	21.1158	32.6332
ENSCSAG00000009923	HSD11B1L	hydroxysteroid 11-beta dehydrogenase 1 like	37.8305	0.110165	0.0990485	1.11799	0.263571	0.99969	0.0976504	0.882832	54.0443	34.6881	36.6749	25.9146
ENSCSAG00000010432	MYH10	myosin heavy chain 10	587.359	0.110084	0.112895	0.975088	0.329516	0.99969	0.14856	0.919762	618.86	623.518	559.014	548.046
ENSCSAG00000010554	CREB3	cAMP responsive element binding protein 3	49.7869	0.109973	0.10775	1.02155	0.306993	0.99969	0.130159	0.909446	58.2831	54.6337	41.1203	45.1106
ENSCSAG00000006645	ATG3	autophagy related 3	57.8149	0.109967	0.110424	0.996183	0.319161	0.99969	0.139973	0.915257	65.7009	64.1729	46.6771	54.7086
ENSCSAG00000006725	ELOF1	elongation factor 1 homolog	50.3043	0.109923	0.103554	1.06618	0.286341	0.99969	0.114199	0.89808	75.2381	40.7585	47.7885	37.4322
ENSCSAG00000012660	VIRMA	vir like m6A methyltransferase associated	210.667	0.10985	0.119134	0.921878	0.356592	0.99969	0.172	0.929931	233.132	219.402	172.261	217.875
ENSCSAG00000003312	ZNF180		53.2744	0.109793	0.10908	1.00758	0.313655	0.99969	0.135495	0.912701	59.3428	60.7041	48.8998	44.1508
ENSCSAG00000018084			73.5385	0.109791	0.113475	0.966931	0.333578	0.99969	0.151986	0.921429	72.0591	91.0561	60.0134	71.0252
ENSCSAG00000013665	UACA		152.861	0.10971	0.119049	0.920994	0.357053	0.99969	0.172412	0.930087	152.596	177.776	125.584	155.488
ENSCSAG00000012181	MLH3		29.6941	0.109692	0.0935877	1.17404	0.240379	0.99969	0.0819652	0.863472	34.9698	36.4225	16.6704	30.7136
ENSCSAG00000002173	NES	nestin	69.6579	0.109661	0.112687	0.974788	0.329666	0.99969	0.148685	0.919824	84.7754	70.2433	68.9043	54.7086
ENSCSAG00000008400	CCHCR1	coiled-coil alpha-helical rod protein 1	47.9982	0.109625	0.100756	1.0942	0.273866	0.99969	0.104994	0.890127	64.6412	46.8289	55.568	24.9548
ENSCSAG00000018541	EID2B	EP300 interacting inhibitor of differentiation 2B	15.4282	0.1095	0.076615	1.45155	0.146628	0.99969	0.0315132	0.708589	24.3729	16.4768	12.225	8.6382
ENSCSAG00000008235	DENND2A		16.1799	0.109318	0.0783498	1.40945	0.158702	0.99969	0.0367827	0.73946	23.3132	19.0784	8.89088	13.4372
ENSCSAG00000015895	MAST4	microtubule associated serine/threonine kinase family member 4	40.5224	0.109313	0.101632	1.07545	0.282173	0.99969	0.111086	0.895523	39.2086	54.6337	28.8953	39.3518
ENSCSAG00000013180	MEGF9	multiple EGF like domains 9	49.0514	0.109267	0.105565	1.03483	0.300748	0.99969	0.125239	0.906222	54.0443	58.1025	32.2294	51.8292
ENSCSAG00000000484	TAF7	TATA-box binding protein associated factor 7	154.542	0.109243	0.119197	0.916864	0.359214	0.99969	0.174344	0.930808	178.028	155.229	146.699	138.211
ENSCSAG00000007027	CDR2	cerebellar degeneration related protein 2	213.417	0.109204	0.118852	0.918869	0.358164	0.99969	0.173404	0.930459	238.431	218.535	192.265	204.437
ENSCSAG00000006418	SDHAF2	succinate dehydrogenase complex assembly factor 2	56.1899	0.109204	0.109888	0.994338	0.320058	0.99969	0.140709	0.915663	65.7009	60.7041	45.5657	52.789
ENSCSAG00000007340	SLC16A9	solute carrier family 16 member 9	52.2024	0.109171	0.108615	1.00656	0.314147	0.99969	0.135892	0.912934	61.4621	56.3681	47.7885	43.191
ENSCSAG00000005517	MBTD1		193.674	0.109152	0.119242	0.914896	0.360246	0.99969	0.175271	0.931149	199.222	217.668	153.368	204.437
ENSCSAG00000005526	TTC17	tetratricopeptide repeat domain 17	113.957	0.109073	0.118243	0.922233	0.356407	0.99969	0.171835	0.929868	122.924	124.877	96.6883	111.337
ENSCSAG00000012358	SNX30		54.236	0.109046	0.10948	0.996901	0.318813	0.99969	0.139688	0.915099	60.4025	61.5713	48.8998	46.0704
ENSCSAG00000006095	PATL1		85.5803	0.108977	0.110561	0.984386	0.324926	0.99969	0.144727	0.917812	72.0591	119.674	55.568	95.0202
ENSCSAG00000016884	KLHL5	kelch like family member 5	114.786	0.108949	0.118285	0.920816	0.357147	0.99969	0.172495	0.930118	116.566	132.682	103.356	106.538
ENSCSAG00000005138	IGFBP7		1817.1	0.108842	0.113195	0.961669	0.336216	0.99969	0.154228	0.922482	2096.07	1746.54	1888.2	1537.6
ENSCSAG00000009431	CHCHD4	coiled-coil-helix-coiled-coil-helix domain containing 4	59.9039	0.108611	0.110231	0.986927	0.323678	0.99969	0.143692	0.917269	77.3575	57.2353	52.2339	52.789
ENSCSAG00000006561	TNRC6A	trinucleotide repeat containing adaptor 6A	252.445	0.108504	0.118415	0.916015	0.359659	0.99969	0.174744	0.930955	254.326	284.442	223.383	247.628
ENSCSAG00000018108	POLI	DNA polymerase iota	23.5839	0.108433	0.0884997	1.23292	0.217606	0.99969	0.0677563	0.839438	26.4923	31.2192	22.2272	14.397
ENSCSAG00000008890	RIC1	RIC1 homolog, RAB6A GEF complex partner 1	356.84	0.108396	0.118711	0.912702	0.361399	0.99969	0.176308	0.931526	351.818	411.053	276.729	387.759
ENSCSAG00000012160	CACNA2D1		36.5815	0.108386	0.0994061	1.09095	0.275295	0.99969	0.106031	0.891084	41.328	44.2273	23.3386	37.4322
ENSCSAG00000003894	THAP12	THAP domain containing 12	260.738	0.10838	0.118026	0.918122	0.358555	0.99969	0.173754	0.930589	271.281	284.442	236.72	250.508
ENSCSAG00000007265	UNC119	unc-119 lipid binding chaperone	172.189	0.108256	0.119118	0.909596	0.363036	0.99969	0.177784	0.932056	201.342	169.971	181.152	136.292
ENSCSAG00000015540		serine/threonine-protein phosphatase 4 regulatory subunit 1	195.676	0.108245	0.119228	0.907417	0.364186	0.99969	0.178826	0.932425	205.58	215.933	150.034	211.156
ENSCSAG00000014128	TTPAL	alpha tocopherol transfer protein like	28.485	0.108078	0.0940472	1.15123	0.249639	0.99969	0.0880834	0.871738	30.7311	37.2897	20.0045	25.9146
ENSCSAG00000012956	PON2		256.422	0.108012	0.118338	0.912496	0.361507	0.99969	0.176406	0.931561	267.042	280.106	222.272	256.267
ENSCSAG00000017561	ANKRD12		128.429	0.107948	0.117505	0.917783	0.358733	0.99969	0.173913	0.930648	123.984	156.096	94.4656	139.171
ENSCSAG00000005722		septin 3	26.362	0.107918	0.0906912	1.19213	0.233211	0.99969	0.0773638	0.856516	27.552	36.4225	15.559	25.9146
ENSCSAG00000008831	LRRC75A		17.2385	0.107914	0.0767065	1.42736	0.153476	0.99969	0.0344556	0.726673	31.7908	13.8752	8.89088	14.397
ENSCSAG00000016100	KCTD9		22.3157	0.107807	0.0875158	1.2407	0.214716	0.99969	0.0660393	0.835948	30.7311	24.2816	18.8931	15.3568
ENSCSAG00000015855	NYNRIN	NYN domain and retroviral integrase containing	31.8204	0.107771	0.0969576	1.11451	0.265061	0.99969	0.0986987	0.883932	41.328	33.8208	23.3386	28.794
ENSCSAG00000012612	ADGRF5	adhesion G protein-coupled receptor F5	109.148	0.107681	0.118018	0.912157	0.361686	0.99969	0.176567	0.931619	112.327	124.877	96.6883	102.699
ENSCSAG00000007703	DDX50	DExD-box helicase 50	120.175	0.107649	0.117997	0.912927	0.361281	0.99969	0.176202	0.931487	128.223	132.682	126.695	93.1006
ENSCSAG00000011302	TRPC1	transient receptor potential cation channel subfamily C member 1	175.842	0.107631	0.119219	0.902253	0.366923	0.99969	0.181311	0.933289	173.79	204.659	144.477	180.442
ENSCSAG00000002702	DEF8		107.22	0.107623	0.117777	0.914137	0.360645	0.99969	0.175629	0.931279	126.103	107.533	94.4656	100.779
ENSCSAG00000013005	PKHD1		63.6654	0.107615	0.111115	0.967883	0.333103	0.99969	0.151583	0.921236	61.4621	80.6497	51.1225	61.4272
ENSCSAG00000017260	RETREG1	reticulophagy regulator 1	50.5765	0.107566	0.107712	0.998911	0.317838	0.99969	0.138891	0.914653	57.2234	57.2353	38.8976	48.9498
ENSCSAG00000001474	MTF2	metal response element binding transcription factor 2	218.27	0.107548	0.118759	0.905596	0.36515	0.99969	0.179699	0.932731	226.774	239.348	211.158	195.799
ENSCSAG00000017352	KANSL3	KAT8 regulatory NSL complex subunit 3	412.839	0.107547	0.115266	0.932972	0.350834	0.99969	0.166898	0.927943	437.653	437.069	381.196	395.438
ENSCSAG00000001654	ZNF805		367.699	0.107545	0.117213	0.917227	0.359024	0.99969	0.174174	0.930745	364.534	417.124	316.737	372.403
ENSCSAG00000014436	ENDOG	endonuclease G	48.476	0.107544	0.105282	1.02489	0.305413	0.99969	0.128907	0.908647	64.6412	45.9617	47.7885	35.5126
ENSCSAG00000009413	ACER2	alkaline ceramidase 2	28.1735	0.107534	0.0925417	1.16962	0.242156	0.99969	0.0831242	0.865119	38.1489	29.4848	27.784	17.2764
ENSCSAG00000014957	RNF170	ring finger protein 170	38.4923	0.107509	0.0975205	1.10207	0.270429	0.99969	0.102517	0.88777	34.9698	55.5009	22.2272	41.2714
ENSCSAG00000008588	DYNLT2B	dynein light chain Tctex-type 2B	107.547	0.107487	0.117447	0.915848	0.359747	0.99969	0.174822	0.930984	132.462	102.33	95.5769	99.8192
ENSCSAG00000018798	HTD2		31.2228	0.107481	0.0943582	1.13994	0.254312	0.99969	0.0912442	0.875629	32.8505	41.6257	17.7818	32.6332
ENSCSAG00000017395	DOP1A	DOP1 leucine zipper like protein A	55.7823	0.107478	0.108907	0.989084	0.322622	0.99969	0.142819	0.916805	70.9994	54.6337	53.3453	44.1508
ENSCSAG00000003502	BCO1	beta-carotene oxygenase 1	33.3009	0.107477	0.0983922	1.09385	0.27402	0.99969	0.105105	0.89023	38.1489	39.8913	24.4499	30.7136
ENSCSAG00000004149	NFAT5	nuclear factor of activated T cells 5	165.604	0.107426	0.11705	0.916826	0.359234	0.99969	0.174362	0.930814	143.058	218.535	115.581	185.241
ENSCSAG00000008180	RIN1	Ras and Rab interactor 1	38.3347	0.107334	0.100987	1.06675	0.286086	0.99969	0.114007	0.897927	49.8055	39.0241	36.6749	27.8342
ENSCSAG00000002325	TESC		36.3633	0.107308	0.0991844	1.08665	0.277192	0.99969	0.107416	0.892337	46.6265	38.1569	36.6749	23.995
ENSCSAG00000019682	TMEM203	transmembrane protein 203	42.7964	0.107297	0.104502	1.02871	0.303616	0.99969	0.127488	0.907724	51.9249	45.9617	37.7862	35.5126
ENSCSAG00000010719	RNF38	ring finger protein 38	211.661	0.106914	0.118951	0.898105	0.36913	0.99969	0.183326	0.933974	201.342	255.824	153.368	236.111
ENSCSAG00000014607	PPIC	peptidylprolyl isomerase C	129.212	0.106834	0.118504	0.900993	0.367592	0.99969	0.181922	0.933498	133.521	146.557	103.356	133.412
ENSCSAG00000005519	DPCD	deleted in primary ciliary dyskinesia homolog (mouse)	63.0766	0.106826	0.10946	0.978744	0.327706	0.99969	0.147043	0.919002	82.656	58.9697	65.5702	45.1106
ENSCSAG00000019657	ZNF581	zinc finger protein 581	60.5623	0.106812	0.10957	0.976398	0.328868	0.99969	0.148015	0.919491	63.5815	71.9777	64.4589	42.2312
ENSCSAG00000005898	SMAGP	small cell adhesion glycoprotein	93.078	0.106656	0.116006	0.920414	0.357356	0.99969	0.172682	0.930188	117.626	86.7201	84.4633	83.5026
ENSCSAG00000002324	FBXO21	F-box protein 21	177.606	0.106584	0.119205	0.894352	0.371134	0.99969	0.185164	0.934586	196.043	184.714	172.261	157.407
ENSCSAG00000004031	MAP4K1	mitogen-activated protein kinase kinase kinase kinase 1	16.606	0.106449	0.0797686	1.34653	0.17813	0.99969	0.0460482	0.78037	20.1342	22.5472	12.225	11.5176
ENSCSAG00000011515	COMMD2	COMM domain containing 2	308.248	0.106442	0.117326	0.907134	0.364336	0.99969	0.178961	0.932472	332.743	322.599	273.394	304.257
ENSCSAG00000002394	PGS1	phosphatidylglycerophosphate synthase 1	73.9674	0.106437	0.114429	0.930401	0.352164	0.99969	0.16807	0.92841	81.5963	81.5169	65.5702	67.186
ENSCSAG00000015971	TRMT44		52.1669	0.106383	0.108412	0.981742	0.326227	0.99969	0.145809	0.918372	60.4025	57.2353	41.1203	49.9096
ENSCSAG00000011204	ZNF189		33.8335	0.10638	0.0990455	1.07568	0.282072	0.99969	0.111012	0.89546	38.1489	40.7585	26.6726	29.7538
ENSCSAG00000005474	LDB1	LIM domain binding 1	164.494	0.106241	0.119242	0.891132	0.372858	0.99969	0.186751	0.935106	176.969	176.042	160.036	144.93
ENSCSAG00000003203	MMP10	matrix metallopeptidase 10	109.204	0.106216	0.11695	0.907771	0.363999	0.99969	0.178656	0.932365	120.805	117.939	80.0179	118.055
ENSCSAG00000005424	EHF	ETS homologous factor	305.326	0.106212	0.117477	0.904004	0.365993	0.99969	0.180466	0.932998	305.191	343.412	293.399	279.302
ENSCSAG00000009485		60S ribosomal protein L32	18.8597	0.106147	0.0831426	1.28645	0.198284	0.99969	0.0566578	0.813841	22.2535	25.1488	15.559	12.4774
ENSCSAG00000016409	ZDHHC3	zinc finger DHHC-type palmitoyltransferase 3	78.5662	0.106046	0.114602	0.925334	0.354792	0.99969	0.170399	0.929319	90.0738	83.2513	62.2361	78.7036
ENSCSAG00000010132	LPCAT3	lysophosphatidylcholine acyltransferase 3	206.151	0.106019	0.119031	0.890359	0.373273	0.99969	0.187133	0.93523	206.64	234.144	182.263	201.558
ENSCSAG00000007363	PKP2	plakophilin 2	208.984	0.10599	0.11908	0.889767	0.373591	0.99969	0.187426	0.935325	201.342	245.418	193.377	195.799
ENSCSAG00000015694	NUBPL		59.1268	0.105976	0.110723	0.957047	0.338544	0.99969	0.156217	0.923394	63.5815	68.5089	47.7885	56.6282
ENSCSAG00000014651	DLGAP5		182.671	0.105911	0.11919	0.888787	0.374117	0.99969	0.187913	0.935482	196.043	195.12	181.152	158.367
ENSCSAG00000006153	TUBA1A	tubulin alpha-1A chain	443.914	0.105899	0.115985	0.913233	0.36112	0.99969	0.176057	0.931435	489.578	450.945	451.212	383.92
ENSCSAG00000003305	FHDC1		8.84294	0.105894	0.0609226	1.81519	0.0694949	0.99969	0.00716053	0.369375	13.776	13.008	6.66816	1.9196
ENSCSAG00000010270	PARD3B	par-3 family cell polarity regulator beta	69.56	0.10589	0.113479	0.933126	0.350755	0.99969	0.166828	0.927915	73.1188	80.6497	61.1248	63.3468
ENSCSAG00000016773	HMGCS1	3-hydroxy-3-methylglutaryl-CoA synthase 1	169.177	0.105831	0.119222	0.88719	0.374977	0.99969	0.188708	0.935736	168.491	195.12	142.254	170.844
ENSCSAG00000006478	OCA2	OCA2 melanosomal transmembrane protein	42.3489	0.105754	0.103153	1.02556	0.3051	0.99969	0.128659	0.908487	48.7458	48.5633	28.8953	43.191
ENSCSAG00000012127	MRPS18A	mitochondrial ribosomal protein S18A	113.622	0.105734	0.118194	0.894988	0.370794	0.99969	0.184851	0.934483	123.984	122.275	112.247	95.98
ENSCSAG00000000925	ASAP3	ArfGAP with SH3 domain, ankyrin repeat and PH domain 3	32.3805	0.105671	0.0978822	1.08282	0.278887	0.99969	0.108659	0.893438	40.2683	35.5553	27.784	25.9146
ENSCSAG00000010559	TEDC2	tubulin epsilon and delta complex 2	29.8261	0.105575	0.0937024	1.13331	0.257084	0.99969	0.0931424	0.877854	37.0892	33.8208	31.1181	17.2764
ENSCSAG00000015131			46.1346	0.105513	0.105912	0.99662	0.318949	0.99969	0.139799	0.915161	51.9249	52.8993	35.5635	44.1508
ENSCSAG00000012508	MTERF1	mitochondrial transcription termination factor 1	51.1989	0.105416	0.107999	0.976274	0.328929	0.99969	0.148067	0.919517	51.9249	63.3057	44.4544	45.1106
ENSCSAG00000017617	DIS3	DIS3 homolog, exosome endoribonuclease and 3'-5' exoribonuclease	67.7694	0.105397	0.112769	0.934818	0.349882	0.99969	0.16606	0.927606	78.4172	71.9777	54.4566	66.2262
ENSCSAG00000014657	TOR1A	torsin family 1 member A	82.9803	0.105356	0.114715	0.91879	0.358205	0.99969	0.173441	0.930473	81.5963	100.595	84.4633	65.2664
ENSCSAG00000014055	IFT52		115.541	0.105315	0.118308	0.890647	0.373119	0.99969	0.186991	0.935184	132.462	117.939	110.025	101.739
ENSCSAG00000014825	GMFB		265.803	0.105153	0.118332	0.888316	0.374371	0.99969	0.188147	0.935557	265.983	300.052	232.274	264.905
ENSCSAG00000010385	TSPAN6	tetraspanin 6	49.9787	0.105108	0.107827	0.975403	0.32936	0.99969	0.148429	0.919697	57.2234	55.5009	41.1203	46.0704
ENSCSAG00000015408	TRAPPC6B	trafficking protein particle complex 6B	22.075	0.105103	0.0875287	1.20739	0.227282	0.99969	0.0736466	0.850358	25.4326	28.6176	18.8931	15.3568
ENSCSAG00000015274	CEP57L1	centrosomal protein 57 like 1	27.4995	0.105089	0.091485	1.15062	0.24989	0.99969	0.0882519	0.871952	24.3729	41.6257	20.0045	23.995
ENSCSAG00000013015	CPNE3	copine 3	756.073	0.105025	0.113107	0.928407	0.353196	0.99969	0.168983	0.928769	743.904	851.592	680.152	748.644
ENSCSAG00000017623	BORA		32.1468	0.104922	0.0971312	1.08132	0.279557	0.99969	0.109151	0.893868	32.8505	42.4929	24.4499	28.794
ENSCSAG00000007978	NMRK1	nicotinamide riboside kinase 1	26.8531	0.104827	0.0931416	1.12963	0.258632	0.99969	0.0942093	0.87907	32.8505	31.2192	22.2272	21.1156
ENSCSAG00000014559	FBXL4	F-box and leucine rich repeat protein 4	44.6215	0.1048	0.104174	1.00721	0.313835	0.99969	0.13564	0.912786	43.4474	58.1025	43.343	33.593
ENSCSAG00000005675	AMBRA1	autophagy and beclin 1 regulator 1	167.493	0.104711	0.11924	0.878033	0.379926	0.99969	0.193311	0.93717	185.446	174.307	142.254	167.965
ENSCSAG00000005042	CEP135	centrosomal protein 135	145.382	0.104651	0.118699	0.880956	0.378341	0.99969	0.191833	0.936717	138.82	175.175	117.804	149.729
ENSCSAG00000012983	ARHGDIG	Rho GDP dissociation inhibitor gamma	33.5172	0.104589	0.0969409	1.08257	0.278997	0.99969	0.10874	0.893509	47.6861	31.2192	24.4499	30.7136
ENSCSAG00000012524	FAM171B	family with sequence similarity 171 member B	407.033	0.104553	0.118319	0.883275	0.377088	0.99969	0.190666	0.936354	377.25	489.102	335.631	426.151
ENSCSAG00000013784	ZBTB1	zinc finger and BTB domain containing 1	141.437	0.104516	0.118971	0.878082	0.379899	0.99969	0.193286	0.937163	146.238	158.698	117.804	143.01
ENSCSAG00000010048			26.7809	0.104498	0.0901052	1.16138	0.245488	0.99969	0.085317	0.868128	27.552	37.2897	14.4477	27.8342
ENSCSAG00000004118	ADH5		96.7781	0.104488	0.116927	0.893417	0.371634	0.99969	0.185623	0.934738	95.3723	115.338	90.0201	86.382
ENSCSAG00000001098	THRAP3	thyroid hormone receptor associated protein 3	296.443	0.104424	0.117327	0.889915	0.373511	0.99969	0.187353	0.935301	308.37	320.864	273.394	283.141
ENSCSAG00000007562	REXO5	RNA exonuclease 5	35.5239	0.104306	0.09997	1.04491	0.296066	0.99969	0.121604	0.903689	37.0892	45.0945	31.1181	28.794
ENSCSAG00000007749	WDFY1		143.428	0.104298	0.119143	0.875552	0.381274	0.99969	0.194573	0.937552	155.775	152.627	136.697	128.613
ENSCSAG00000012232	CYP1B1	cytochrome P450 family 1 subfamily B member 1	11.1646	0.104279	0.0684558	1.555	0.119947	0.99969	0.021234	0.620987	13.776	17.344	7.77952	5.7588
ENSCSAG00000013458	KIN		84.2183	0.104271	0.115879	0.89989	0.368179	0.99969	0.182457	0.93368	87.9544	96.2593	77.7952	74.8644
ENSCSAG00000001484	ABCD3	ATP binding cassette subfamily D member 3	237.731	0.104238	0.119039	0.875193	0.381469	0.99969	0.194755	0.937607	226.774	280.973	202.267	240.91
ENSCSAG00000015874	NOTCH1	notch receptor 1	806.61	0.104153	0.112641	0.924738	0.355102	0.99969	0.170674	0.929425	863.649	836.849	822.406	703.534
ENSCSAG00000003395	RND2	Rho family GTPase 2	28.688	0.104145	0.0944051	1.10785	0.267925	0.99969	0.100728	0.886004	34.9698	32.9536	26.6726	20.1558
ENSCSAG00000017478		ERCC excision repair 5, endonuclease	134.466	0.104138	0.118482	0.878325	0.379767	0.99969	0.193163	0.937125	123.984	166.503	117.804	129.573
ENSCSAG00000014510	PHAX		139.735	0.104093	0.119096	0.87391	0.382167	0.99969	0.195411	0.937803	146.238	154.362	127.806	130.533
ENSCSAG00000016401	CC2D2A	coiled-coil and C2 domain containing 2A	63.8122	0.104072	0.110342	0.942318	0.34603	0.99969	0.162688	0.926216	63.5815	78.9153	45.5657	67.186
ENSCSAG00000004628	FDXR	ferredoxin reductase	65.7482	0.104048	0.105397	0.991729	0.32133	0.99969	0.141754	0.916232	96.432	52.8993	73.3497	40.3116
ENSCSAG00000013338	PBRM1	polybromo 1	168.639	0.104036	0.119176	0.872398	0.382991	0.99969	0.196185	0.938033	161.073	201.191	143.365	168.925
ENSCSAG00000004726		Rho guanine nucleotide exchange factor 25	110.058	0.104034	0.117786	0.883891	0.376755	0.99969	0.190357	0.936257	132.462	106.666	102.245	98.8594
ENSCSAG00000005918	LETMD1	LETM1 domain containing 1	218.968	0.104029	0.118805	0.875378	0.381368	0.99969	0.194661	0.937579	221.476	245.418	197.822	211.156
ENSCSAG00000013572	STAU2		248.864	0.104001	0.118923	0.874083	0.382073	0.99969	0.195322	0.937777	240.55	290.512	210.047	254.347
ENSCSAG00000005109	MT1A		97.1401	0.103998	0.116692	0.890745	0.373066	0.99969	0.186942	0.935168	102.79	109.267	76.6838	99.8192
ENSCSAG00000004452	SCD5	stearoyl-CoA desaturase 5	129.87	0.103936	0.118749	0.875084	0.381528	0.99969	0.194811	0.937624	128.223	151.76	123.361	116.136
ENSCSAG00000017366	ITPRIPL1	ITPRIP like 1	46.0055	0.103903	0.104117	1.00139	0.316637	0.99969	0.137912	0.9141	62.5218	42.4929	44.4544	34.5528
ENSCSAG00000003600	DBF4B		44.9295	0.103887	0.105195	0.989761	0.322291	0.99969	0.142546	0.916659	56.1637	45.9617	41.1203	36.4724
ENSCSAG00000006118	DNAJC22	DnaJ heat shock protein family (Hsp40) member C22	88.8318	0.103828	0.116208	0.894187	0.371222	0.99969	0.185245	0.934613	104.91	89.3217	83.352	77.7438
ENSCSAG00000007120	TCAF1	TRPM8 channel associated factor 1	81.6167	0.103752	0.11538	0.89902	0.368642	0.99969	0.18288	0.933824	87.9544	91.0561	67.7929	79.6634
ENSCSAG00000017708	EBPL	EBP like	60.8261	0.10369	0.109977	0.944636	0.344845	0.99969	0.161657	0.92578	68.88	66.7745	64.4589	43.191
ENSCSAG00000012772	RAB11FIP3		76.0958	0.103583	0.113532	0.913796	0.360824	0.99969	0.175791	0.931338	87.9544	79.7825	80.0179	56.6282
ENSCSAG00000011829	PCYOX1L	prenylcysteine oxidase 1 like	20.5184	0.103521	0.0813026	1.28165	0.199966	0.99969	0.0575879	0.816295	29.6714	22.5472	7.77952	22.0754
ENSCSAG00000009239	CLDN2		519.575	0.103476	0.114142	0.906539	0.364651	0.99969	0.179246	0.932573	564.816	532.462	472.328	508.694
ENSCSAG00000006845			72.9843	0.103462	0.113717	0.909364	0.363158	0.99969	0.177895	0.932095	74.1785	86.7201	60.0134	71.0252
ENSCSAG00000013548	LMBRD1	LMBR1 domain containing 1	105.34	0.10301	0.114796	0.89637	0.370055	0.99969	0.184174	0.934258	104.91	126.611	68.9043	120.935
ENSCSAG00000012623		pleckstrin homology domain containing O2	47.2692	0.102964	0.105857	0.975111	0.329505	0.99969	0.14855	0.919757	59.3428	47.6961	45.5657	36.4724
ENSCSAG00000013212	DCUN1D1	defective in cullin neddylation 1 domain containing 1	87.6426	0.102929	0.116142	0.885938	0.375651	0.99969	0.189332	0.935934	89.0141	102.33	76.6838	82.5428
ENSCSAG00000010779	CNOT8	CCR4-NOT transcription complex subunit 8	189.715	0.10284	0.119201	0.8624	0.388468	0.99969	0.201361	0.93953	196.043	209.863	160.036	192.92
ENSCSAG00000016219	GID8	GID complex subunit 8 homolog	245.76	0.10282	0.118572	0.866934	0.385978	0.99969	0.199001	0.938857	260.684	262.762	210.047	249.548
ENSCSAG00000003230	CEP126	centrosomal protein 126	11.5558	0.10281	0.0685815	1.52405	0.127497	0.99969	0.0239492	0.648868	14.8357	17.344	4.44544	9.598
ENSCSAG00000002899	FRG1	FSHD region gene 1	42.3973	0.102809	0.104488	0.985189	0.324531	0.99969	0.144399	0.917641	48.7458	47.6961	36.6749	36.4724
ENSCSAG00000008186			40.4021	0.102724	0.102647	1.00172	0.316478	0.99969	0.137783	0.914026	40.2683	52.0321	36.6749	32.6332
ENSCSAG00000010860	SAMD12	sterile alpha motif domain containing 12	65.3388	0.102635	0.11161	0.919417	0.357878	0.99969	0.173148	0.930363	61.4621	83.2513	60.0134	56.6282
ENSCSAG00000018355	STEEP1		35.7844	0.102455	0.100395	1.02163	0.306957	0.99969	0.13013	0.909428	39.2086	43.3601	28.8953	31.6734
ENSCSAG00000016908	MTMR9	myotubularin related protein 9	17.6298	0.102434	0.0802637	1.28531	0.198684	0.99969	0.056878	0.814428	16.9551	27.7504	13.3363	12.4774
ENSCSAG00000001044	TMEM39B	transmembrane protein 39B	37.8763	0.10243	0.101366	1.01095	0.31204	0.99969	0.134193	0.911929	40.2683	46.8289	28.8953	35.5126
ENSCSAG00000009211	BACH1	BTB domain and CNC homolog 1	163.07	0.102416	0.119203	0.858722	0.390494	0.99969	0.203289	0.940069	158.954	190.784	142.254	160.287
ENSCSAG00000007797	GDE1	glycerophosphodiester phosphodiesterase 1	126.161	0.102386	0.118582	0.86298	0.388149	0.99969	0.201058	0.939444	129.282	143.088	105.579	126.694
ENSCSAG00000007294	ECI2	enoyl-CoA delta isomerase 2	148.052	0.102373	0.119191	0.859003	0.390339	0.99969	0.203141	0.940028	158.954	158.698	141.143	133.412
ENSCSAG00000018178	VPS37D	VPS37D subunit of ESCRT-I	42.7215	0.102335	0.102545	1.0017	0.316487	0.99969	0.13779	0.91403	56.1637	41.6257	43.343	29.7538
ENSCSAG00000002139	JOSD2	Josephin domain containing 2	19.6936	0.102194	0.0830353	1.23874	0.21544	0.99969	0.0664678	0.836833	28.6117	20.8128	11.1136	18.2362
ENSCSAG00000012615	ASXL1		340.657	0.102115	0.11802	0.864925	0.38708	0.99969	0.200044	0.939156	346.519	377.233	278.951	359.925
ENSCSAG00000012850	CCDC66		76.4615	0.102105	0.114265	0.893286	0.371704	0.99969	0.185688	0.934759	74.1785	93.6577	68.9043	69.1056
ENSCSAG00000008589			40.0606	0.102041	0.101466	1.00659	0.314133	0.99969	0.135881	0.912927	49.8055	42.4929	26.6726	41.2714
ENSCSAG00000003334	ZNF225		18.8252	0.102002	0.0826613	1.24524	0.213043	0.99969	0.0650544	0.833877	25.4326	21.68	16.6704	11.5176
ENSCSAG00000014621	ADGRG2		86.1987	0.101991	0.114324	0.891333	0.372751	0.99969	0.186651	0.935074	89.0141	100.595	61.1248	94.0604
ENSCSAG00000006797	UBFD1		246.548	0.101893	0.1183	0.861171	0.389144	0.99969	0.202003	0.939711	259.625	264.496	221.161	240.91
ENSCSAG00000014939	EIF2D	eukaryotic translation initiation factor 2D	138.737	0.101803	0.119037	0.855187	0.392448	0.99969	0.205156	0.940582	153.655	144.823	121.138	135.332
ENSCSAG00000008456	NT5M	5',3'-nucleotidase, mitochondrial	17.9598	0.101749	0.0803027	1.28234	0.199724	0.99969	0.0574535	0.815945	26.4923	19.0784	16.6704	9.598
ENSCSAG00000015916	FBXO16		17.3956	0.101674	0.0801266	1.27636	0.201828	0.99969	0.0586261	0.818959	19.0745	25.1488	10.0022	15.3568
ENSCSAG00000014028	SYNE1	spectrin repeat containing nuclear envelope protein 1	171.89	0.101599	0.119241	0.851741	0.394358	0.99969	0.206987	0.941077	178.028	189.917	147.811	171.804
ENSCSAG00000011390	PLSCR1	phospholipid scramblase 1	23.8182	0.101584	0.0861148	1.18874	0.234544	0.99969	0.0782103	0.857849	24.3729	33.8208	25.5613	11.5176
ENSCSAG00000011882	FEZ2		152.23	0.101584	0.11882	0.855772	0.392124	0.99969	0.204846	0.940498	187.566	140.487	152.256	128.613
ENSCSAG00000018184	RELCH	RAB11 binding and LisH domain, coiled-coil and HEAT repeat containing	98.1225	0.101563	0.117164	0.866584	0.38617	0.99969	0.199183	0.938909	104.91	108.4	82.2406	96.9398
ENSCSAG00000003111	MFAP3L	microfibril associated protein 3 like	24.9978	0.10156	0.0912031	1.11722	0.263902	0.99969	0.0978828	0.883078	28.6117	31.2192	20.0045	20.1558
ENSCSAG00000005436		heterogeneous nuclear ribonucleoprotein A1	57.2939	0.101554	0.109061	0.933291	0.35067	0.99969	0.166753	0.927885	69.9397	58.1025	58.9021	42.2312
ENSCSAG00000017488	FAM210A	family with sequence similarity 210 member A	204.946	0.101484	0.11924	0.850576	0.395005	0.99969	0.207609	0.941243	187.566	250.621	180.04	201.558
ENSCSAG00000014707	RCN2		181.017	0.101458	0.119239	0.851433	0.394529	0.99969	0.207152	0.941121	216.177	171.706	177.818	158.367
ENSCSAG00000017225	KATNA1		65.3557	0.1014	0.112322	0.903313	0.36636	0.99969	0.180799	0.933113	68.88	75.4465	63.3475	53.7488
ENSCSAG00000007440		poly(rC) binding protein 3	36.2032	0.101359	0.100429	1.00995	0.312518	0.99969	0.134578	0.912158	39.2086	44.2273	27.784	33.593
ENSCSAG00000006699	ZNF440		16.8183	0.101356	0.0797623	1.27966	0.200666	0.99969	0.0579771	0.817303	21.1938	21.68	10.0022	14.397
ENSCSAG00000004703	SLC38A7		56.3749	0.101336	0.110034	0.921789	0.356639	0.99969	0.172042	0.929947	66.7606	58.9697	48.8998	50.8694
ENSCSAG00000003092	FBXO8	F-box protein 8	70.5721	0.101224	0.113125	0.894366	0.371126	0.99969	0.185157	0.934584	74.1785	81.5169	55.568	71.0252
ENSCSAG00000014379	ATP2B4	ATPase plasma membrane Ca2+ transporting 4	149.868	0.10121	0.118998	0.849968	0.395343	0.99969	0.207934	0.941329	145.178	176.909	126.695	150.689
ENSCSAG00000013004	CCDC120	coiled-coil domain containing 120	22.751	0.101174	0.0870652	1.16497	0.244031	0.99969	0.0843551	0.866825	24.3729	31.2192	13.3363	22.0754
ENSCSAG00000003866	MED29	mediator complex subunit 29	58.1675	0.101142	0.109435	0.923689	0.355648	0.99969	0.17116	0.929611	61.4621	68.5089	42.2317	60.4674
ENSCSAG00000010614	SH3BGRL	SH3 domain binding glutamate rich protein like	149.146	0.101134	0.118786	0.850746	0.394911	0.99969	0.207518	0.941219	145.178	176.042	118.915	156.447
ENSCSAG00000005311	CHD9	chromodomain helicase DNA binding protein 9	192.494	0.101106	0.119208	0.847577	0.396674	0.99969	0.209216	0.941668	173.79	238.48	166.704	191
ENSCSAG00000010110	ANKRD28	ankyrin repeat domain 28	500.439	0.101084	0.115837	0.872421	0.382979	0.99969	0.196173	0.93803	483.22	574.087	443.432	501.016
ENSCSAG00000011571	GORAB	golgin, RAB6 interacting	41.6408	0.101073	0.102927	0.983048	0.325584	0.99969	0.145274	0.918096	51.9249	43.3601	30.0067	41.2714
ENSCSAG00000005209	LGR4	leucine rich repeat containing G protein-coupled receptor 4	865.876	0.101053	0.114873	0.879533	0.379112	0.99969	0.192551	0.936938	800.068	1026.77	775.729	860.941
ENSCSAG00000016197	ZEB2		68.9195	0.101035	0.112553	0.897308	0.369554	0.99969	0.183715	0.934105	75.2381	77.1809	52.2339	71.0252
ENSCSAG00000017919	ELP2	elongator acetyltransferase complex subunit 2	68.8417	0.100996	0.113428	0.890786	0.373044	0.99969	0.186922	0.935162	75.2381	76.3137	63.3475	60.4674
ENSCSAG00000006259	SGF29		14.8605	0.100971	0.076217	1.34162	0.179718	0.99969	0.0468475	0.783305	22.2535	16.4768	11.1136	9.598
ENSCSAG00000018182	ABHD11	abhydrolase domain containing 11	63.4105	0.10091	0.112195	0.899888	0.36818	0.99969	0.182458	0.933681	69.9397	70.2433	57.7907	55.6684
ENSCSAG00000010084	TFIP11	tuftelin interacting protein 11	123.592	0.100894	0.118235	0.853667	0.393289	0.99969	0.205962	0.940801	126.103	140.487	128.918	98.8594
ENSCSAG00000001410	ADGRL2	adhesion G protein-coupled receptor L2	360.385	0.100784	0.11759	0.856793	0.391559	0.99969	0.204306	0.94035	363.474	400.647	301.178	376.242
ENSCSAG00000012933	ACTR8	actin related protein 8	66.5012	0.100645	0.111563	0.902639	0.366718	0.99969	0.181125	0.933225	82.656	65.0401	51.1225	67.186
ENSCSAG00000005174	TMC6	transmembrane channel like 6	54.4478	0.100639	0.108363	0.930321	0.352205	0.99969	0.168107	0.928424	70.9994	51.1649	46.6771	48.9498
ENSCSAG00000015576	BRD3	bromodomain containing 3	61.8795	0.100631	0.11096	0.908445	0.363643	0.99969	0.178334	0.932251	73.1188	64.1729	62.2361	47.99
ENSCSAG00000019084	ZNF391	zinc finger protein 391	17.8902	0.100569	0.0810622	1.24731	0.212285	0.99969	0.0646109	0.832927	19.0745	26.016	11.1136	15.3568
ENSCSAG00000007030	TRIP12	thyroid hormone receptor interactor 12	466.7	0.100564	0.116257	0.864852	0.38712	0.99969	0.200082	0.939167	492.757	494.305	391.199	488.538
ENSCSAG00000011326	SPATS2L	spermatogenesis associated serine rich 2 like	312.473	0.100561	0.118904	0.845271	0.39796	0.99969	0.210458	0.941992	292.475	372.897	253.39	331.131
ENSCSAG00000003869	ACE		96.0165	0.100554	0.116958	0.8598	0.3899	0.99969	0.202723	0.939912	109.148	99.7281	81.1293	94.0604
ENSCSAG00000016071	IRF9	interferon regulatory factor 9	26.6923	0.100369	0.0910859	1.10915	0.267366	0.99969	0.100331	0.885604	36.0295	27.7504	26.6726	16.3166
ENSCSAG00000011105	C12orf4	chromosome unknown C12orf4 homolog	146.484	0.10029	0.118958	0.842535	0.399489	0.99969	0.211938	0.942374	143.058	171.706	123.361	147.809
ENSCSAG00000014913			26.461	0.100278	0.0916612	1.09561	0.273251	0.99969	0.104549	0.889711	27.552	35.5553	17.7818	24.9548
ENSCSAG00000007543	C1QTNF6	C1q and TNF related 6	82.8529	0.0999507	0.115213	0.867047	0.385916	0.99969	0.198942	0.93884	85.8351	95.3921	66.6816	83.5026
ENSCSAG00000000652	AHDC1	AT-hook DNA binding motif containing 1	47.1549	0.0999493	0.106741	0.937453	0.348526	0.99969	0.164869	0.927121	54.0443	52.0321	42.2317	40.3116
ENSCSAG00000008097	PLEKHA5	pleckstrin homology domain containing A5	404.432	0.0999202	0.118018	0.846317	0.397376	0.99969	0.209894	0.941845	393.146	464.82	327.851	431.91
ENSCSAG00000005057	AASDH	aminoadipate-semialdehyde dehydrogenase	274.868	0.0998066	0.11914	0.837213	0.402473	0.99969	0.214839	0.943108	252.207	333.872	224.495	288.9
ENSCSAG00000003779	KANSL1	KAT8 regulatory NSL complex subunit 1	496.831	0.0997687	0.118288	0.843141	0.399149	0.99969	0.211609	0.94229	484.279	570.618	383.419	549.006
ENSCSAG00000003427	PLCG2	phospholipase C gamma 2	17.4747	0.0997131	0.0810879	1.24008	0.214947	0.99969	0.0661758	0.836231	22.2535	21.68	14.4477	11.5176
ENSCSAG00000004436	MGMT		41.6377	0.0997032	0.104084	0.959011	0.337553	0.99969	0.15537	0.923008	47.6861	46.8289	35.5635	36.4724
ENSCSAG00000012320	DHX57	DExH-box helicase 57	129.199	0.099682	0.11624	0.856519	0.391711	0.99969	0.204451	0.94039	111.268	169.971	94.4656	141.091
ENSCSAG00000011889	MAGI1		64.4312	0.0996672	0.109172	0.911824	0.361861	0.99969	0.176724	0.931676	55.104	88.4545	48.8998	65.2664
ENSCSAG00000013372	UPF2	UPF2 regulator of nonsense mediated mRNA decay	147.386	0.0996599	0.119086	0.836492	0.402878	0.99969	0.215234	0.943206	151.536	164.768	124.472	148.769
ENSCSAG00000010552			76.7632	0.0996377	0.114784	0.868039	0.385373	0.99969	0.198429	0.938691	79.4769	88.4545	70.0157	69.1056
ENSCSAG00000013932		ST6 N-acetylgalactosaminide alpha-2,6-sialyltransferase 6	36.7217	0.0995812	0.100883	0.988589	0.322864	0.99969	0.143019	0.916912	44.5071	39.8913	28.8953	33.593
ENSCSAG00000002675	CACNB1		18.9996	0.0995226	0.0832087	1.20422	0.228505	0.99969	0.0744064	0.851659	26.4923	20.8128	13.3363	15.3568
ENSCSAG00000010026	SEC13	SEC13 homolog, nuclear pore and COPII coat complex component	154.335	0.0995144	0.119188	0.835316	0.40354	0.99969	0.21588	0.943367	172.73	157.831	153.368	133.412
ENSCSAG00000008605	ZC3HAV1		66.3071	0.0994656	0.112491	0.884667	0.376337	0.99969	0.189968	0.936135	68.88	77.1809	64.4589	54.7086
ENSCSAG00000003653	EED	embryonic ectoderm development	79.1738	0.0993605	0.111561	0.889544	0.373711	0.99969	0.187537	0.935361	77.3575	97.9937	51.1225	90.2212
ENSCSAG00000011293	USP49	ubiquitin specific peptidase 49	15.135	0.0993524	0.0771873	1.29873	0.194038	0.99969	0.0543394	0.807428	19.0745	19.9456	10.0022	11.5176
ENSCSAG00000006379	ZNF207	zinc finger protein 207	320.101	0.0993472	0.117296	0.846794	0.39711	0.99969	0.209637	0.941778	331.684	346.013	281.174	321.533
ENSCSAG00000006917	SSH2	slingshot protein phosphatase 2	91.932	0.0993169	0.115089	0.862071	0.388649	0.99969	0.201533	0.939578	90.0738	111.002	67.7929	98.8594
ENSCSAG00000012381	SLC31A2	solute carrier family 31 member 2	20.0643	0.09931	0.0829632	1.20324	0.228882	0.99969	0.0746417	0.852058	27.552	22.5472	10.0022	20.1558
ENSCSAG00000002169	RAC3	Rac family small GTPase 3	38.0687	0.0992624	0.0936512	1.06849	0.285299	0.99969	0.113417	0.89745	60.4025	29.4848	42.2317	20.1558
ENSCSAG00000007295	LGALS1	galectin 1	1072.2	0.09926	0.111723	0.888549	0.374246	0.99969	0.188031	0.93552	1202.75	1051.05	1071.35	963.64
ENSCSAG00000017439	CCDC127	coiled-coil domain containing 127	98.5345	0.0991742	0.117296	0.845379	0.397899	0.99969	0.2104	0.941977	107.029	106.666	84.4633	95.98
ENSCSAG00000014179	CTDSPL	CTD small phosphatase like	311.355	0.0991535	0.117633	0.84267	0.399413	0.99969	0.211865	0.942355	317.908	341.677	270.06	315.774
ENSCSAG00000005747	TSPOAP1		74.8371	0.0991489	0.113803	0.872421	0.382979	0.99969	0.196173	0.93803	87.9544	76.3137	75.5725	59.5076
ENSCSAG00000007237	NRXN2	neurexin 2	54.5338	0.0991244	0.106768	0.927383	0.353728	0.99969	0.169454	0.928953	48.7458	73.7121	40.0089	55.6684
ENSCSAG00000006859	ATL3	atlastin GTPase 3	365.657	0.0991104	0.11702	0.84685	0.397079	0.99969	0.209607	0.94177	398.444	375.498	313.403	375.282
ENSCSAG00000015428	STK17A		114.538	0.0990705	0.117841	0.841543	0.400044	0.99969	0.212477	0.942512	136.7	111.002	114.47	95.98
ENSCSAG00000007152	PCNT		144.345	0.0988548	0.119039	0.830905	0.406027	0.99969	0.218314	0.943963	168.491	141.354	138.92	128.613
ENSCSAG00000001600	MOV10	Mov10 RISC complex RNA helicase	146.484	0.0988189	0.119181	0.8292	0.406991	0.99969	0.21926	0.944191	155.775	157.831	138.92	133.412
ENSCSAG00000002257	SRSF9	serine and arginine rich splicing factor 9	223.671	0.0988152	0.118828	0.831326	0.40579	0.99969	0.218081	0.943906	232.073	243.684	193.377	225.553
ENSCSAG00000015919	ZNF395	zinc finger protein 395	193.102	0.0987784	0.119192	0.829138	0.407026	0.99969	0.219295	0.944199	219.356	192.519	194.488	166.045
ENSCSAG00000000934	HMGCL	3-hydroxy-3-methylglutaryl-CoA lyase	43.1745	0.098756	0.101494	0.977103	0.328518	0.99969	0.147723	0.919344	62.5218	36.4225	41.1203	32.6332
ENSCSAG00000015335	MICAL1		98.7483	0.0987528	0.117391	0.841137	0.400271	0.99969	0.212697	0.942568	102.79	111.002	90.0201	91.181
ENSCSAG00000012164	ZDHHC8	zinc finger DHHC-type palmitoyltransferase 8	85.5574	0.0987263	0.116078	0.850902	0.394824	0.99969	0.207435	0.941197	94.3126	91.9233	81.1293	74.8644
ENSCSAG00000010391	CCNJL		36.3379	0.0987098	0.0986214	1.00095	0.31685	0.99969	0.138086	0.914198	31.7908	52.0321	28.8953	32.6332
ENSCSAG00000005006	ZNF430		35.6917	0.0986538	0.0970484	1.01606	0.309599	0.99969	0.132235	0.910741	31.7908	51.1649	23.3386	36.4724
ENSCSAG00000004228	SNCA	synuclein alpha	28.6661	0.0986277	0.0941096	1.05125	0.293142	0.99969	0.119357	0.902053	38.1489	29.4848	21.1158	25.9146
ENSCSAG00000013883	SERPINF1		31.965	0.0984889	0.0959588	1.03139	0.302356	0.99969	0.126498	0.907069	43.4474	31.2192	31.1181	22.0754
ENSCSAG00000013136	PLPP2	phospholipid phosphatase 2	95.5924	0.0984559	0.115951	0.850307	0.395155	0.99969	0.207753	0.941281	120.805	87.5873	93.3542	80.6232
ENSCSAG00000013598	TERF1	telomeric repeat binding factor 1	83.4442	0.098434	0.114614	0.858043	0.390869	0.99969	0.203647	0.940168	78.4172	104.064	67.7929	83.5026
ENSCSAG00000018909		securin-like	23.3869	0.0984297	0.0885165	1.11599	0.264426	0.99969	0.0982514	0.883465	23.3132	32.9536	20.0045	17.2764
ENSCSAG00000005816	TEF	TEF transcription factor, PAR bZIP family member	114.249	0.0983809	0.118076	0.833817	0.404384	0.99969	0.216705	0.94357	130.342	116.205	114.47	95.98
ENSCSAG00000012098	VEPH1	ventricular zone expressed PH domain containing 1	80.8393	0.0982965	0.114317	0.860142	0.389711	0.99969	0.202543	0.939862	98.5514	78.9153	63.3475	82.5428
ENSCSAG00000001096	TRAPPC3	trafficking protein particle complex 3	137.91	0.0979972	0.118702	0.82619	0.408696	0.99969	0.220938	0.944591	168.491	128.346	130.029	124.774
ENSCSAG00000003346	TAF1C		25.5682	0.097983	0.0914245	1.07587	0.281987	0.99969	0.110948	0.895407	28.6117	32.0864	23.3386	18.2362
ENSCSAG00000013275	SMAD3	SMAD family member 3	210.416	0.0979806	0.118812	0.824703	0.40954	0.99969	0.22177	0.944788	227.834	219.402	196.711	197.719
ENSCSAG00000008178	AGK		39.9206	0.0979529	0.101576	0.96752	0.333284	0.99969	0.151736	0.92131	54.0443	37.2897	36.6749	31.6734
ENSCSAG00000011931	POLR2M	RNA polymerase II subunit M	170.075	0.0979523	0.119118	0.82181	0.411185	0.99969	0.223395	0.945167	173.79	190.784	133.363	182.362
ENSCSAG00000008390	SF3B6	splicing factor 3b subunit 6	149.227	0.0979059	0.118784	0.823616	0.410158	0.99969	0.22238	0.944931	147.297	173.44	117.804	158.367
ENSCSAG00000010641	RHOU	ras homolog family member U	97.0869	0.0978555	0.116929	0.836969	0.40261	0.99969	0.214973	0.943141	97.4917	112.736	95.5769	82.5428
ENSCSAG00000002920	ARHGAP20	Rho GTPase activating protein 20	13.1874	0.0978368	0.0724538	1.37256	0.16989	0.99969	0.0420014	0.764198	21.1938	13.8752	10.0022	7.6784
ENSCSAG00000009824	ACO1		138.094	0.0977814	0.119036	0.821594	0.411308	0.99969	0.223517	0.945196	155.775	140.487	125.584	130.533
ENSCSAG00000005647	MKS1	MKS transition zone complex subunit 1	28.1786	0.0977307	0.094294	1.04004	0.298321	0.99969	0.123349	0.904922	34.9698	31.2192	24.4499	22.0754
ENSCSAG00000010151	PRRT4	proline rich transmembrane protein 4	19.6488	0.0976835	0.0827832	1.18935	0.234303	0.99969	0.0780569	0.857609	30.7311	18.2112	13.3363	16.3166
ENSCSAG00000003575	CMC2	C-X9-C motif containing 2	72.4792	0.097667	0.114088	0.856614	0.391658	0.99969	0.204401	0.940376	81.5963	77.1809	67.7929	63.3468
ENSCSAG00000015989	CHMP4A		31.4902	0.0976627	0.0969184	1.01101	0.312013	0.99969	0.134171	0.911916	40.2683	32.9536	27.784	24.9548
ENSCSAG00000018115	IFT88	intraflagellar transport 88	24.7431	0.0975943	0.0908947	1.07675	0.281594	0.99969	0.110657	0.89516	28.6117	30.352	18.8931	21.1156
ENSCSAG00000011330	TLE2		223.472	0.0974928	0.118891	0.81978	0.412341	0.99969	0.224541	0.945432	216.177	258.426	210.047	209.236
ENSCSAG00000012106	APBB1IP	amyloid beta precursor protein binding family B member 1 interacting protein	6.5366	0.0974855	0.0541089	1.89352	0.058289	0.99969	0.00502645	0.299269	11.6566	9.53921	1.11136	3.8392
ENSCSAG00000019745	EID1	EP300 interacting inhibitor of differentiation 1	136.383	0.0974825	0.117616	0.830028	0.406523	0.99969	0.2188	0.94408	166.372	128.346	150.034	100.779
ENSCSAG00000010155	METTL6	methyltransferase like 6	74.042	0.0974247	0.114289	0.853027	0.393644	0.99969	0.206302	0.940893	85.8351	76.3137	67.7929	66.2262
ENSCSAG00000019572	PNMA1	PNMA family member 1	41.0604	0.0973788	0.103578	0.941733	0.34633	0.99969	0.16295	0.926326	49.8055	43.3601	35.5635	35.5126
ENSCSAG00000017642	GREB1L		56.3811	0.0973546	0.109795	0.886476	0.375361	0.99969	0.189064	0.935849	59.3428	65.9073	45.5657	54.7086
ENSCSAG00000006131	TROAP	trophinin associated protein	40.5074	0.0973433	0.103404	0.942854	0.345756	0.99969	0.162449	0.926116	47.6861	44.2273	35.5635	34.5528
ENSCSAG00000011078	ALG2	ALG2 alpha-1,3/1,6-mannosyltransferase	78.4386	0.0973328	0.114709	0.84808	0.396393	0.99969	0.208946	0.941597	79.4769	91.9233	65.5702	76.784
ENSCSAG00000000909	CDC42	cell division cycle 42	29.5076	0.0973202	0.0949997	1.02548	0.305135	0.99969	0.128686	0.908505	31.7908	37.2897	21.1158	27.8342
ENSCSAG00000012556	OAZ2	ornithine decarboxylase antizyme 2	41.321	0.097212	0.101118	0.960862	0.336622	0.99969	0.154574	0.922643	43.4474	51.1649	25.5613	45.1106
ENSCSAG00000008490	PTRHD1	peptidyl-tRNA hydrolase domain containing 1	34.3441	0.0971769	0.0983894	0.988666	0.322827	0.99969	0.142988	0.916896	41.328	38.1569	23.3386	34.5528
ENSCSAG00000011553	RRP36		110.33	0.0971364	0.117445	0.82799	0.407676	0.99969	0.219933	0.944352	129.282	109.267	114.47	88.3016
ENSCSAG00000009091	RHPN1	rhophilin Rho GTPase binding protein 1	20.5022	0.0971028	0.0808156	1.21758	0.223382	0.99969	0.0712461	0.846092	34.9698	16.4768	20.0045	10.5578
ENSCSAG00000001453	LRRC8B	leucine rich repeat containing 8 VRAC subunit B	53.8222	0.0970631	0.109281	0.888379	0.374337	0.99969	0.188115	0.935547	57.2234	62.4385	46.6771	48.9498
ENSCSAG00000005403	SFXN2	sideroflexin 2	49.3731	0.0970117	0.10732	0.904097	0.365944	0.99969	0.180421	0.932982	55.104	55.5009	38.8976	47.99
ENSCSAG00000008771	DRC1		13.9911	0.0969852	0.0743873	1.31619	0.188112	0.99969	0.0511774	0.797934	14.8357	21.68	8.89088	10.5578
ENSCSAG00000010940	SERPINA6	serpin family A member 6	36.2721	0.0969661	0.100711	0.964737	0.334676	0.99969	0.152917	0.92187	41.328	41.6257	33.3408	28.794
ENSCSAG00000000931	PITHD1	PITH domain containing 1	14.496	0.0969567	0.07545	1.296	0.194977	0.99969	0.0548483	0.808873	15.8954	21.68	8.89088	11.5176
ENSCSAG00000004119	LGR5		26.111	0.0969563	0.0918889	1.05935	0.289441	0.99969	0.116537	0.899921	29.6714	32.0864	24.4499	18.2362
ENSCSAG00000009222	ADPRM	ADP-ribose/CDP-alcohol diphosphatase, manganese dependent	28.6115	0.0969538	0.0944415	1.02865	0.303646	0.99969	0.127512	0.90774	29.6714	37.2897	24.4499	23.0352
ENSCSAG00000004088	TMEM19		102.011	0.0969009	0.117279	0.825758	0.408941	0.99969	0.221179	0.944648	102.79	117.939	85.5747	101.739
ENSCSAG00000001147	SMAP2	small ArfGAP2	42.2942	0.0968717	0.104163	0.931677	0.351503	0.99969	0.167487	0.928179	48.7458	46.8289	40.0089	33.593
ENSCSAG00000006366	CIP2A		76.1708	0.0968573	0.114316	0.847012	0.396989	0.99969	0.20952	0.941748	82.656	84.1185	61.1248	76.784
ENSCSAG00000011952	ARHGEF26	Rho guanine nucleotide exchange factor 26	23.592	0.096855	0.0879532	1.10366	0.269741	0.99969	0.102023	0.887288	27.552	29.4848	13.3363	23.995
ENSCSAG00000004324	ARFIP2	ADP ribosylation factor interacting protein 2	93.1446	0.0968521	0.116859	0.828947	0.407135	0.99969	0.219401	0.944225	104.91	97.1265	82.2406	88.3016
ENSCSAG00000009028	COX10	COX10, heme A:farnesyltransferase cytochrome c oxidase assembly factor	98.1764	0.0968515	0.116893	0.828304	0.407498	0.99969	0.219759	0.944311	108.089	104.931	78.9065	100.779
ENSCSAG00000003032	CWF19L2	CWF19 like cell cycle control factor 2	105.728	0.0967004	0.117273	0.823951	0.409968	0.99969	0.222192	0.944887	103.85	124.877	86.686	107.498
ENSCSAG00000011461	HPS3	HPS3 biogenesis of lysosomal organelles complex 2 subunit 1	81.8293	0.0966882	0.115648	0.836097	0.4031	0.99969	0.215451	0.94326	87.9544	90.1889	73.3497	75.8242
ENSCSAG00000014063	WDR37	WD repeat domain 37	59.5824	0.096625	0.110763	0.872482	0.382945	0.99969	0.196142	0.938021	67.8203	64.1729	47.7885	58.5478
ENSCSAG00000004075	ARHGEF17	Rho guanine nucleotide exchange factor 17	237.867	0.096582	0.118736	0.813704	0.415815	0.99969	0.227995	0.946214	262.804	241.949	242.276	204.437
ENSCSAG00000005717	SLC25A28	solute carrier family 25 member 28	21.7699	0.0965326	0.084569	1.15117	0.249662	0.99969	0.088099	0.871758	25.4326	27.7504	23.3386	10.5578
ENSCSAG00000002110	NARF	nuclear prelamin A recognition factor	98.5024	0.0965216	0.116925	0.826172	0.408707	0.99969	0.220948	0.944594	109.148	104.064	101.134	79.6634
ENSCSAG00000005636	ARFGAP3	ADP ribosylation factor GTPase activating protein 3	263.149	0.0964348	0.118519	0.813336	0.416025	0.99969	0.228205	0.946261	259.625	298.317	227.829	266.825
ENSCSAG00000014023	IGF2BP3		109.922	0.096401	0.118173	0.815857	0.414582	0.99969	0.226767	0.945939	119.745	117.072	101.134	101.739
ENSCSAG00000009944	C1RL	complement C1r subcomponent like	38.5453	0.0963821	0.101007	0.954135	0.340015	0.99969	0.157481	0.923962	41.328	46.8289	26.6726	39.3518
ENSCSAG00000013380	C15orf61		23.8053	0.0963623	0.0892572	1.08502	0.277912	0.99969	0.107943	0.892807	32.8505	24.2816	18.8931	19.196
ENSCSAG00000015538	AMD1		173.757	0.0963584	0.119226	0.808363	0.418882	0.99969	0.231062	0.94689	185.446	184.714	172.261	152.608
ENSCSAG00000010680	GLIPR2	GLI pathogenesis related 2	39.4915	0.0961483	0.100932	0.956205	0.338969	0.99969	0.156582	0.923559	52.9846	37.2897	38.8976	28.794
ENSCSAG00000011444	SCYL3	SCY1 like pseudokinase 3	39.075	0.0959764	0.101523	0.94802	0.343119	0.99969	0.16016	0.925139	51.9249	37.2897	34.4521	32.6332
ENSCSAG00000008145	RAB1B	RAB1B, member RAS oncogene family	253.874	0.0959752	0.118276	0.811588	0.417028	0.99969	0.229207	0.946483	271.281	266.231	253.39	224.593
ENSCSAG00000008008	TRIM52		12.318	0.0958286	0.071126	1.36427	0.172482	0.99969	0.043256	0.769461	13.776	19.0784	7.77952	8.6382
ENSCSAG00000017830	ZSCAN21	zinc finger with KRAB and SCAN domains 1	47.8814	0.0958239	0.104864	0.916069	0.359631	0.99969	0.174718	0.930946	52.9846	54.6337	52.2339	31.6734
ENSCSAG00000012046	GPATCH11	G-patch domain containing 11	11.2082	0.0958119	0.0685467	1.41964	0.155714	0.99969	0.0354435	0.732251	15.8954	14.7424	5.5568	8.6382
ENSCSAG00000011753	PTPN3		242.407	0.0957775	0.118466	0.808261	0.418941	0.99969	0.231121	0.946903	244.789	268.832	218.938	237.071
ENSCSAG00000017474	ARGLU1		39.7257	0.0957159	0.100531	0.955963	0.339091	0.99969	0.156687	0.923606	50.8652	39.8913	42.2317	25.9146
ENSCSAG00000013327	TTLL11		12.4007	0.0956747	0.0700523	1.38277	0.166736	0.99969	0.0404979	0.757567	11.6566	21.68	6.66816	9.598
ENSCSAG00000001494	PTBP2	polypyrimidine tract binding protein 2	423.563	0.0956346	0.11899	0.803332	0.421783	0.99969	0.233978	0.947517	384.668	515.118	328.962	465.503
ENSCSAG00000004224	TXNL4B	thioredoxin like 4B	33.7604	0.0956299	0.0987994	0.968685	0.332703	0.99969	0.151244	0.921074	36.0295	41.6257	26.6726	30.7136
ENSCSAG00000018897	ZBTB39	zinc finger and BTB domain containing 39	28.4531	0.0956109	0.0946722	1.01199	0.311544	0.99969	0.133795	0.911689	31.7908	34.6881	23.3386	23.995
ENSCSAG00000016225	EVC2		63.1928	0.0955978	0.111472	0.85716	0.391357	0.99969	0.204113	0.940297	65.7009	73.7121	50.0112	63.3468
ENSCSAG00000006776	IFIT2	interferon induced protein with tetratricopeptide repeats 2	24.609	0.0955686	0.0903317	1.06012	0.289092	0.99969	0.116273	0.899716	26.4923	32.0864	17.7818	22.0754
ENSCSAG00000018220	CBLN2	cerebellin 2 precursor	24.6469	0.095554	0.0905576	1.05761	0.290233	0.99969	0.117138	0.900383	26.4923	32.0864	18.8931	21.1156
ENSCSAG00000012676	ARPC5		125.267	0.0955151	0.117923	0.810935	0.417403	0.99969	0.229582	0.946566	149.417	120.541	132.252	98.8594
ENSCSAG00000003329	ZNF226		19.8032	0.0955148	0.0834403	1.14842	0.250794	0.99969	0.0888605	0.872717	20.1342	28.6176	12.225	18.2362
ENSCSAG00000017237	ZSCAN2	zinc finger and SCAN domain containing 2	32.4878	0.0954815	0.0956185	1.00196	0.316365	0.99969	0.137691	0.913974	32.8505	42.4929	34.4521	20.1558
ENSCSAG00000009277	C3orf20	chromosome unknown C3orf20 homolog	11.2427	0.0952871	0.0675313	1.43192	0.152166	0.99969	0.033883	0.723332	12.7163	18.2112	4.44544	9.598
ENSCSAG00000011704	SUCLG2	succinate-CoA ligase GDP-forming subunit beta	226.707	0.0952737	0.118975	0.800451	0.42345	0.99969	0.23566	0.947872	231.013	250.621	190.042	235.151
ENSCSAG00000003876	PPFIA2		105.783	0.0952124	0.117393	0.81051	0.417647	0.99969	0.229826	0.94662	101.73	126.611	91.1315	103.658
ENSCSAG00000000554	PIGW	phosphatidylinositol glycan anchor biosynthesis class W	78.6957	0.0951945	0.114074	0.833782	0.404404	0.99969	0.216724	0.943575	78.4172	93.6577	61.1248	81.583
ENSCSAG00000017634	PCDH9		82.2759	0.0951876	0.11569	0.822775	0.410636	0.99969	0.222852	0.945041	86.8948	91.9233	74.4611	75.8242
ENSCSAG00000007274	IPMK	inositol polyphosphate multikinase	212.041	0.0951778	0.119214	0.797992	0.424875	0.99969	0.237102	0.948173	219.356	232.41	168.927	227.473
ENSCSAG00000005277		RAB5B, member RAS oncogene family	135.472	0.0950111	0.118726	0.799806	0.423823	0.99969	0.236038	0.947951	139.879	150.893	110.025	141.091
ENSCSAG00000010650	TMEM8B		53.0972	0.0949746	0.108548	0.874677	0.38175	0.99969	0.195019	0.937686	52.9846	65.0401	44.4544	49.9096
ENSCSAG00000012661	ZNF410	zinc finger protein 410	132.39	0.0949497	0.11865	0.800095	0.423656	0.99969	0.235869	0.947916	148.357	136.151	107.802	137.251
ENSCSAG00000002350	CBX2	chromobox 2	144.346	0.094914	0.119134	0.796868	0.425528	0.99969	0.237763	0.94831	162.133	146.557	133.363	135.332
ENSCSAG00000008565	SLC51A	solute carrier family 51 subunit alpha	15.4576	0.0948579	0.0769632	1.24069	0.214722	0.99969	0.0660427	0.835955	16.9551	22.5472	8.89088	13.4372
ENSCSAG00000009823	SON		289.041	0.09475	0.118413	0.799825	0.423812	0.99969	0.236026	0.947949	274.46	337.341	254.501	289.86
ENSCSAG00000008071	LAPTM4A	lysosomal protein transmembrane 4 alpha	383.372	0.0947238	0.117078	0.808814	0.418622	0.99969	0.230802	0.946833	365.594	443.14	345.633	379.121
ENSCSAG00000016874	TNKS	tankyrase	63.1413	0.09462	0.110571	0.854921	0.392595	0.99969	0.205297	0.94062	61.4621	78.0481	47.7885	65.2664
ENSCSAG00000018877	EPM2AIP1	EPM2A interacting protein 1	51.8975	0.094603	0.107761	0.878044	0.37992	0.99969	0.193306	0.937168	60.4025	55.5009	38.8976	52.789
ENSCSAG00000008788	PPP3CB		102.557	0.0945682	0.117094	0.807062	0.419631	0.99969	0.231814	0.947053	97.4917	124.01	88.9088	99.8192
ENSCSAG00000014729	CDKL5		40.8029	0.0944458	0.101811	0.92724	0.353802	0.99969	0.16952	0.928979	37.0892	55.5009	32.2294	38.392
ENSCSAG00000009433	NADSYN1	NAD synthetase 1	139.843	0.094431	0.119106	0.792864	0.427857	0.99969	0.240129	0.948793	151.536	147.424	128.918	131.493
ENSCSAG00000009939	ZNRF3	zinc and ring finger 3	365.661	0.0944221	0.116324	0.81158	0.417033	0.99969	0.229211	0.946484	375.131	395.444	331.185	360.885
ENSCSAG00000018324		serine/threonine-protein kinase TAO1-like	41.2008	0.0944012	0.103624	0.911333	0.36212	0.99969	0.176958	0.93176	44.5071	48.5633	33.3408	38.392
ENSCSAG00000005838	SKA2	spindle and kinetochore associated complex subunit 2	108.043	0.0943698	0.117984	0.799678	0.423898	0.99969	0.236113	0.947967	110.208	122.275	98.911	100.779
ENSCSAG00000013167	HMCN1	hemicentin 1	772.276	0.0943657	0.114838	0.821566	0.411324	0.99969	0.223533	0.945199	722.71	901.022	687.932	777.438
ENSCSAG00000019097	H2BC3		669.725	0.0943008	0.113247	0.832801	0.404957	0.99969	0.217265	0.943707	748.143	658.206	653.479	619.071
ENSCSAG00000011823	RC3H1		231.888	0.0942606	0.119028	0.791273	0.428784	0.99969	0.241073	0.948983	209.819	286.176	173.372	258.186
ENSCSAG00000014267	HOXA3	homeobox A3	33.7415	0.0941527	0.0961332	0.984428	0.324905	0.99969	0.14471	0.917803	43.4474	34.6881	36.6749	20.1558
ENSCSAG00000017029	GCC2	GRIP and coiled-coil domain containing 2	190.298	0.0940181	0.119131	0.789267	0.429956	0.99969	0.242269	0.949222	212.998	191.651	172.261	184.282
ENSCSAG00000007346	TMEM199		72.317	0.0940122	0.113285	0.830779	0.406098	0.99969	0.218384	0.94398	90.0738	68.5089	64.4589	66.2262
ENSCSAG00000010937	ZNF487		9.66927	0.0940047	0.0642545	1.49922	0.133816	0.99969	0.0263399	0.670228	16.9551	10.4064	5.5568	5.7588
ENSCSAG00000010659	BRWD3	bromodomain and WD repeat domain containing 3	100.568	0.0940028	0.117548	0.799668	0.423903	0.99969	0.236119	0.947968	104.91	111.869	93.3542	92.1408
ENSCSAG00000011412	MRPS10	mitochondrial ribosomal protein S10	137.122	0.0940025	0.119065	0.789539	0.429797	0.99969	0.242107	0.94919	148.357	144.823	126.695	128.613
ENSCSAG00000017798	IMPACT	impact RWD domain protein	274.083	0.0939592	0.118578	0.792145	0.428276	0.99969	0.240556	0.948879	290.356	290.512	225.606	289.86
ENSCSAG00000012903	CAMTA2	calmodulin binding transcription activator 2	42.8229	0.093937	0.103711	0.908081	0.363835	0.99969	0.178508	0.932312	55.104	41.6257	40.0089	34.5528
ENSCSAG00000013209	CDC23	cell division cycle 23	128.856	0.0939337	0.118872	0.790178	0.429424	0.99969	0.241726	0.949114	139.879	136.151	115.581	123.814
ENSCSAG00000005654	POLDIP3	DNA polymerase delta interacting protein 3	262.35	0.0939022	0.11848	0.792641	0.427987	0.99969	0.240261	0.94882	300.953	254.957	233.386	260.106
ENSCSAG00000007277	CISD1	CDGSH iron sulfur domain 1	33.2831	0.0938608	0.0983126	0.955778	0.339184	0.99969	0.156767	0.923642	33.9101	42.4929	28.8953	27.8342
ENSCSAG00000007845			11.1877	0.0938336	0.0687563	1.38663	0.165553	0.99969	0.0399406	0.755012	13.776	16.4768	7.77952	6.7186
ENSCSAG00000008052	ZFP62	ZFP62 zinc finger protein	41.7679	0.093808	0.103464	0.906638	0.364598	0.99969	0.179199	0.932556	41.328	52.8993	34.4521	38.392
ENSCSAG00000017924	PCOLCE	procollagen C-endopeptidase enhancer	12.8846	0.0937651	0.072187	1.31749	0.187674	0.99969	0.0509474	0.797207	20.1342	13.8752	8.89088	8.6382
ENSCSAG00000007938	SMG1		339.109	0.0937349	0.117528	0.797302	0.425276	0.99969	0.237508	0.948257	342.281	373.764	290.065	350.327
ENSCSAG00000012944	SESTD1	SEC14 and spectrin domain containing 1	360.782	0.0937298	0.118915	0.787791	0.430819	0.99969	0.24315	0.949397	320.027	444.874	300.067	378.161
ENSCSAG00000004722	PDE3B	phosphodiesterase 3B	135.435	0.0936993	0.118427	0.790541	0.429212	0.99969	0.241509	0.949071	130.342	160.432	108.913	142.05
ENSCSAG00000011126	ZNF277	zinc finger protein 277	69.2682	0.0936554	0.111962	0.836309	0.402981	0.99969	0.215335	0.943231	62.5218	89.3217	66.6816	58.5478
ENSCSAG00000002365	VRK3	VRK serine/threonine kinase 3	163.066	0.0936448	0.119213	0.785969	0.431885	0.99969	0.244242	0.949612	186.506	161.299	163.37	141.091
ENSCSAG00000010119		BRICK1 subunit of SCAR/WAVE actin nucleating complex	123.801	0.0936133	0.118462	0.79078	0.429072	0.99969	0.241367	0.949042	146.238	119.674	118.915	110.377
ENSCSAG00000008532	PIGP	phosphatidylinositol glycan anchor biosynthesis class P	23.1837	0.0935581	0.0888486	1.05794	0.290081	0.99969	0.117023	0.900295	27.552	27.7504	21.1158	16.3166
ENSCSAG00000005274	DEPDC7		25.1794	0.0935362	0.0911102	1.0292	0.303383	0.99969	0.127305	0.907604	26.4923	32.9536	21.1158	20.1558
ENSCSAG00000015114	IHO1		15.3852	0.0934779	0.0771846	1.22007	0.222439	0.99969	0.0706711	0.845034	20.1342	19.0784	8.89088	13.4372
ENSCSAG00000015957			265.108	0.0934662	0.11924	0.783353	0.43342	0.99969	0.245815	0.949918	222.535	341.677	232.274	263.945
ENSCSAG00000006300	SLFN5	schlafen family member 5	26.1203	0.0934375	0.0901892	1.03677	0.299843	0.99969	0.124533	0.905741	26.4923	35.5553	15.559	26.8744
ENSCSAG00000004186	SMARCAD1		111.048	0.0934246	0.11762	0.794305	0.427018	0.99969	0.239276	0.94862	107.029	131.815	112.247	93.1006
ENSCSAG00000008774	BCS1L	BCS1 homolog, ubiquinol-cytochrome c reductase complex chaperone	31.8302	0.0934149	0.0972787	0.962755	0.335671	0.99969	0.153763	0.922266	36.0295	37.2897	30.0067	23.995
ENSCSAG00000015904	NME6	NME/NM23 nucleoside diphosphate kinase 6	75.5109	0.093359	0.114249	0.817259	0.41378	0.99969	0.225969	0.945758	86.8948	78.0481	62.2361	74.8644
ENSCSAG00000013027	DNAJC18	DnaJ heat shock protein family (Hsp40) member C18	107.243	0.0933579	0.117738	0.792531	0.428051	0.99969	0.240327	0.948833	105.969	124.877	94.4656	103.658
ENSCSAG00000011707	CEP128		51.7958	0.0933544	0.108315	0.862638	0.388337	0.99969	0.201236	0.939495	55.104	59.8369	50.0112	42.2312
ENSCSAG00000005291			61.3637	0.0933318	0.110783	0.84344	0.398982	0.99969	0.211447	0.942248	65.7009	69.3761	63.3475	47.0302
ENSCSAG00000011667	TMF1	TATA element modulatory factor 1	208.236	0.093136	0.118894	0.783312	0.433444	0.99969	0.24584	0.949923	225.714	215.933	187.82	203.478
ENSCSAG00000013269	SLC4A11		32.5062	0.0931336	0.0976693	0.954172	0.339997	0.99969	0.157465	0.923955	34.9698	39.8913	24.4499	30.7136
ENSCSAG00000016173	EVC	EvC ciliary complex subunit 1	262.894	0.0931305	0.11867	0.785147	0.432367	0.99969	0.244735	0.949708	306.251	250.621	263.392	231.312
ENSCSAG00000007370	IFT20		77.767	0.0930998	0.114167	0.816481	0.414225	0.99969	0.226412	0.945858	87.9544	81.5169	81.1293	60.4674
ENSCSAG00000011796	EFNB1	ephrin B1	213.141	0.0929499	0.119203	0.780479	0.435109	0.99969	0.247552	0.950252	263.863	190.784	222.272	175.643
ENSCSAG00000016967	ARRDC4		9.70716	0.0929316	0.0641813	1.4858	0.137333	0.99969	0.0277166	0.68139	16.9551	10.4064	6.66816	4.799
ENSCSAG00000012194	TRO	trophinin	28.82	0.0929232	0.0940573	0.990109	0.322121	0.99969	0.142405	0.916584	37.0892	30.352	20.0045	27.8342
ENSCSAG00000013584	JADE2	jade family PHD finger 2	124.341	0.0928999	0.118232	0.7865	0.431574	0.99969	0.243923	0.949549	148.357	118.807	125.584	104.618
ENSCSAG00000003115	SYMPK	symplekin	129.179	0.092886	0.118865	0.781315	0.434617	0.99969	0.247046	0.950155	137.76	138.752	114.47	125.734
ENSCSAG00000002202	PRDM10	PR/SET domain 10	23.365	0.0928778	0.0882579	1.05439	0.291705	0.99969	0.118259	0.901234	26.4923	29.4848	14.4477	23.0352
ENSCSAG00000000580			21.4332	0.0926301	0.0821165	1.14142	0.253693	0.99969	0.090823	0.875124	32.8505	19.9456	23.3386	9.598
ENSCSAG00000015234	NAGK		35.376	0.0926227	0.0988913	0.93934	0.347556	0.99969	0.164021	0.926772	39.2086	41.6257	36.6749	23.995
ENSCSAG00000001389	SLC44A5		11.7578	0.0926132	0.0674904	1.39143	0.164096	0.99969	0.039259	0.751815	14.8357	17.344	3.33408	11.5176
ENSCSAG00000014613	SNX24	sorting nexin 24	54.7833	0.0926124	0.109033	0.850359	0.395126	0.99969	0.207725	0.941274	67.8203	53.7665	46.6771	50.8694
ENSCSAG00000010531		glyceraldehyde-3-phosphate dehydrogenase	620.699	0.0925267	0.116068	0.796968	0.42547	0.99969	0.237704	0.948297	592.368	713.707	527.896	648.825
ENSCSAG00000006088	SCLY	selenocysteine lyase	14.2792	0.0924872	0.0751496	1.24043	0.214817	0.99969	0.066099	0.836072	15.8954	20.8128	8.89088	11.5176
ENSCSAG00000008576	TTC19		68.6175	0.0924175	0.112232	0.822832	0.410604	0.99969	0.22282	0.945034	63.5815	86.7201	58.9021	65.2664
ENSCSAG00000001915	CACNG7	calcium voltage-gated channel auxiliary subunit gamma 7	44.5886	0.0923396	0.104011	0.88758	0.374767	0.99969	0.188513	0.935674	40.2683	59.8369	38.8976	39.3518
ENSCSAG00000002305	TAOK3	TAO kinase 3	38.3183	0.0923352	0.101161	0.91263	0.361437	0.99969	0.176342	0.931538	40.2683	46.8289	27.784	38.392
ENSCSAG00000005441		single-strand-selective monofunctional uracil-DNA glycosylase 1	92.0312	0.092275	0.116178	0.793676	0.427384	0.99969	0.239648	0.948695	89.0141	110.135	77.7952	91.181
ENSCSAG00000007593	HACD2		119.742	0.0922515	0.118367	0.779046	0.435953	0.99969	0.248421	0.950417	126.103	130.947	100.022	121.895
ENSCSAG00000012206	PRKD3	protein kinase D3	156.876	0.0922281	0.119213	0.773517	0.439217	0.99969	0.251795	0.951049	170.61	163.901	135.586	157.407
ENSCSAG00000001319	PRKAA2	protein kinase AMP-activated catalytic subunit alpha 2	73.6663	0.0922164	0.113561	0.811455	0.417105	0.99969	0.229283	0.9465	74.1785	86.7201	58.9021	74.8644
ENSCSAG00000008444	VSIR	V-set immunoregulatory receptor	55.9971	0.0921952	0.109434	0.842677	0.399409	0.99969	0.211861	0.942354	55.104	68.5089	53.3453	47.0302
ENSCSAG00000004029	CEP95	centrosomal protein 95	48.5306	0.0921658	0.104681	0.88034	0.378675	0.99969	0.192144	0.936813	57.2234	52.0321	31.1181	53.7488
ENSCSAG00000002299	BAIAP2		74.7542	0.0920952	0.113691	0.810462	0.417675	0.99969	0.229853	0.946626	75.2381	87.5873	76.6838	59.5076
ENSCSAG00000011310	ZNF300		43.1719	0.0920739	0.10151	0.906686	0.364573	0.99969	0.179176	0.932548	48.7458	49.4305	25.5613	48.9498
ENSCSAG00000011103	YPEL5	yippee like 5	47.3662	0.0919905	0.10499	0.875677	0.381205	0.99969	0.194509	0.937533	50.8652	55.5009	32.2294	50.8694
ENSCSAG00000017734	FNDC3A	fibronectin type III domain containing 3A	172.242	0.0919871	0.118535	0.775304	0.43816	0.99969	0.250701	0.950846	161.073	208.128	127.806	191.96
ENSCSAG00000015992	RNF180		76.071	0.0919868	0.114684	0.802297	0.422381	0.99969	0.234581	0.947645	85.8351	79.7825	66.6816	71.985
ENSCSAG00000013328	MRPS26	mitochondrial ribosomal protein S26	127.555	0.0918679	0.116786	0.787739	0.430849	0.99969	0.243181	0.949403	144.118	130.947	147.811	87.3418
ENSCSAG00000006119	CCNJ	cyclin J	114.663	0.0918583	0.117277	0.782504	0.433919	0.99969	0.246328	0.950017	103.85	143.088	95.5769	116.136
ENSCSAG00000001080	TMEM35B	transmembrane protein 35B	37.4956	0.0918535	0.100148	0.919285	0.357946	0.99969	0.173209	0.930386	39.2086	45.9617	38.8976	25.9146
ENSCSAG00000011886	ELP5	elongator acetyltransferase complex subunit 5	35.2342	0.0918317	0.0981177	0.939488	0.34748	0.99969	0.163955	0.926744	49.8055	31.2192	31.1181	28.794
ENSCSAG00000014906	NTNG2		14.355	0.0917681	0.0754159	1.22797	0.219459	0.99969	0.0688673	0.841618	15.8954	20.8128	11.1136	9.598
ENSCSAG00000014041		eukaryotic translation elongation factor 1 alpha 1	5604.31	0.0917193	0.106407	0.861964	0.388707	0.99969	0.201589	0.939594	5695.85	6003.63	5057.8	5659.94
ENSCSAG00000010679	GATD1	glutamine amidotransferase like class 1 domain containing 1	429.994	0.091711	0.116038	0.790531	0.429218	0.99969	0.241516	0.949072	476.861	427.53	434.542	381.041
ENSCSAG00000009483	TMEM214	transmembrane protein 214	57.4733	0.0917027	0.110341	0.831932	0.405447	0.99969	0.217745	0.943825	67.8203	58.9697	52.2339	50.8694
ENSCSAG00000011042	CHIC1	cysteine rich hydrophobic domain 1	29.8676	0.0916312	0.0948295	0.968472	0.332809	0.99969	0.151334	0.921117	39.2086	30.352	21.1158	28.794
ENSCSAG00000017663	GATA6	GATA binding protein 6	35.9591	0.0916003	0.100449	0.913374	0.361046	0.99969	0.17599	0.931411	39.2086	42.4929	33.3408	28.794
ENSCSAG00000011609	GALC	galactosylceramidase	37.8547	0.091575	0.101817	0.90015	0.368041	0.99969	0.182331	0.933638	42.3877	43.3601	31.1181	34.5528
ENSCSAG00000011425	MPDU1	mannose-P-dolichol utilization defect 1	91.0891	0.0915628	0.11599	0.789663	0.429725	0.99969	0.242033	0.949175	109.148	88.4545	75.5725	91.181
ENSCSAG00000003315	AMOTL1		70.6234	0.0914769	0.113079	0.80995	0.417969	0.99969	0.230148	0.94669	86.8948	67.6417	65.5702	62.387
ENSCSAG00000018055	GOLPH3L	golgi phosphoprotein 3 like	110.973	0.0914549	0.117391	0.778437	0.436312	0.99969	0.248792	0.950487	101.73	137.018	96.6883	108.457
ENSCSAG00000003222	BIRC2		162.758	0.0914468	0.119241	0.76669	0.443266	0.99969	0.256004	0.951815	168.491	177.776	144.477	160.287
ENSCSAG00000016955	UGDH	UDP-glucose 6-dehydrogenase	1449.34	0.0912976	0.113583	0.803712	0.421563	0.99969	0.233757	0.94747	1407.27	1632.07	1221.38	1536.64
ENSCSAG00000009868	RANBP17		154.734	0.0912823	0.119039	0.766311	0.443491	0.99969	0.256239	0.951857	146.238	183.847	133.363	155.488
ENSCSAG00000012919	PPP1R9A		307.56	0.0911438	0.11877	0.767005	0.443078	0.99969	0.255809	0.95178	293.535	357.287	251.167	328.252
ENSCSAG00000003960	NEU3		36.2399	0.0911227	0.100579	0.907157	0.364324	0.99969	0.17895	0.932469	43.4474	39.0241	28.8953	33.593
ENSCSAG00000004966	HERPUD1	homocysteine inducible ER protein with ubiquitin like domain 1	80.2466	0.091067	0.114082	0.797869	0.424946	0.99969	0.237174	0.948188	72.0591	102.33	75.5725	71.0252
ENSCSAG00000011724	LRIG1	leucine rich repeats and immunoglobulin like domains 1	38.3974	0.0910621	0.102203	0.89185	0.372473	0.99969	0.186396	0.934991	43.4474	43.3601	32.2294	34.5528
ENSCSAG00000015974	SREK1IP1	SREK1 interacting protein 1	48.4118	0.0910495	0.107045	0.851537	0.394471	0.99969	0.207096	0.941106	52.9846	54.6337	46.6771	39.3518
ENSCSAG00000009613	B2M	beta-2-microglobulin	407.95	0.0909211	0.115487	0.787207	0.431161	0.99969	0.2435	0.949466	427.056	430.132	373.417	401.197
ENSCSAG00000015144	UBR3		275.115	0.0909005	0.118084	0.769619	0.441526	0.99969	0.254193	0.951488	268.102	312.192	260.058	260.106
ENSCSAG00000008846	STARD9	StAR related lipid transfer domain containing 9	22.7396	0.0908551	0.0877878	1.03754	0.299486	0.99969	0.124255	0.90555	27.552	26.8832	14.4477	22.0754
ENSCSAG00000017422	LCA5	lebercilin LCA5	27.8763	0.0908397	0.0922076	0.986301	0.323985	0.99969	0.143947	0.917403	24.3729	40.7585	23.3386	23.0352
ENSCSAG00000017534	PDGFA		112.173	0.0908017	0.117667	0.771216	0.440579	0.99969	0.253208	0.951309	103.85	137.018	102.245	105.578
ENSCSAG00000018754	BLCAP	BLCAP apoptosis inducing factor	10.4384	0.0908009	0.0668484	1.37979	0.167652	0.99969	0.0409318	0.759519	13.776	14.7424	5.5568	7.6784
ENSCSAG00000009618	CABP7	calcium binding protein 7	14.4371	0.0907695	0.0747311	1.22916	0.219013	0.99969	0.0685987	0.841096	23.3132	13.8752	10.0022	10.5578
ENSCSAG00000003674	NUMBL		33.5295	0.0907513	0.0984169	0.923528	0.355732	0.99969	0.171234	0.92964	41.328	35.5553	25.5613	31.6734
ENSCSAG00000014542	UBXN2B	UBX domain protein 2B	31.2622	0.0906716	0.0960622	0.94438	0.344976	0.99969	0.16177	0.925829	34.9698	37.2897	21.1158	31.6734
ENSCSAG00000005130	POLR2B	RNA polymerase II subunit B	892.962	0.0906595	0.111364	0.814117	0.415578	0.99969	0.227759	0.946161	927.231	940.913	901.313	802.393
ENSCSAG00000016647	ZBTB46	zinc finger and BTB domain containing 46	59.5968	0.0906097	0.110921	0.81718	0.413826	0.99969	0.226015	0.945768	61.4621	69.3761	56.6793	50.8694
ENSCSAG00000015276	RPS29	ribosomal protein S29	137.438	0.0905699	0.115785	0.781212	0.434678	0.99969	0.247109	0.950167	114.447	182.979	97.7996	154.528
ENSCSAG00000013129	UMAD1		16.876	0.0905387	0.0786481	1.15623	0.247587	0.99969	0.0867114	0.869973	18.0148	24.2816	8.89088	16.3166
ENSCSAG00000012239	TOR1AIP2	torsin-1A-interacting protein 2	245.947	0.0905158	0.119174	0.759047	0.447825	0.99969	0.260775	0.952655	232.073	289.645	200.045	262.026
ENSCSAG00000016067	CEP85L	centrosomal protein 85 like	88.7609	0.0905063	0.116077	0.779281	0.435814	0.99969	0.248278	0.95039	86.8948	104.931	77.7952	85.4222
ENSCSAG00000014388	FANCL	FA complementation group L	62.0148	0.0905037	0.109752	0.823721	0.410098	0.99969	0.222321	0.944917	55.104	81.5169	50.0112	61.4272
ENSCSAG00000003792	ARSJ	arylsulfatase family member J	30.5936	0.0904914	0.0931099	0.971977	0.331062	0.99969	0.149859	0.920403	24.3729	46.8289	23.3386	27.8342
ENSCSAG00000007781	VPS13A		286.769	0.0904861	0.118595	0.762685	0.445651	0.99969	0.258496	0.952258	292.475	313.927	234.497	306.176
ENSCSAG00000004583	ZNF792		10.0021	0.0904609	0.0643137	1.43382	0.151624	0.99969	0.0336476	0.721934	15.8954	12.1408	3.33408	8.6382
ENSCSAG00000003489	INPP4B		68.1572	0.0904508	0.113008	0.800463	0.423443	0.99969	0.235653	0.947871	68.88	79.7825	64.4589	59.5076
ENSCSAG00000009703	MMRN2	multimerin 2	5.67056	0.0904187	0.0510522	1.86987	0.0615017	0.99969	0.00560047	0.319353	7.41785	11.2736	1.11136	2.8794
ENSCSAG00000005468		ATP synthase membrane subunit c locus 2	519.06	0.0904087	0.114788	0.787727	0.430856	0.99969	0.243189	0.949404	584.95	504.711	499	487.579
ENSCSAG00000010699	SRPRB	SRP receptor subunit beta	115.068	0.0903528	0.118293	0.76416	0.444772	0.99969	0.257576	0.952095	131.402	115.338	108.913	104.618
ENSCSAG00000007101	GXYLT1	glucoside xylosyltransferase 1	119.448	0.0902043	0.117726	0.765569	0.443933	0.99969	0.2567	0.95194	108.089	148.291	103.356	118.055
ENSCSAG00000002636	TCTN1		57.5608	0.0901935	0.109279	0.826693	0.408411	0.99969	0.220657	0.944525	63.5815	63.3057	61.1248	42.2312
ENSCSAG00000009391	SLC6A6	solute carrier family 6 member 6	319.829	0.0901897	0.117409	0.768043	0.442462	0.99969	0.255166	0.951665	340.161	333.872	278.951	326.332
ENSCSAG00000015814	NOVA1	NOVA alternative splicing regulator 1	36.5797	0.0901889	0.0990287	0.910571	0.362521	0.99969	0.17732	0.93189	40.2683	43.3601	23.3386	39.3518
ENSCSAG00000005974	CRYBG3	crystallin beta-gamma domain containing 3	39.6521	0.0901103	0.101095	0.891252	0.372794	0.99969	0.186691	0.935087	34.9698	54.6337	34.4521	34.5528
ENSCSAG00000017567	MICALL2	MICAL like 2	36.1933	0.0900367	0.0995516	0.90622	0.36482	0.99969	0.1794	0.932626	37.0892	45.0945	36.6749	25.9146
ENSCSAG00000009046	PTPRD		59.6679	0.0900089	0.107943	0.832692	0.405019	0.99969	0.217325	0.943722	55.104	77.1809	41.1203	65.2664
ENSCSAG00000012298	AREL1		66.5323	0.0899627	0.112748	0.798118	0.424802	0.99969	0.237028	0.948158	68.88	76.3137	63.3475	57.588
ENSCSAG00000002074	RIT1		31.8579	0.0899529	0.0966011	0.933901	0.350355	0.99969	0.166476	0.927774	34.9698	38.1569	32.2294	22.0754
ENSCSAG00000015625	BAZ1A		191.656	0.0899505	0.119231	0.75484	0.450345	0.99969	0.263426	0.953109	226.774	180.378	186.708	172.764
ENSCSAG00000013152	GLCCI1		29.6649	0.0899424	0.0955048	0.942922	0.345721	0.99969	0.162419	0.926103	33.9101	34.6881	22.2272	27.8342
ENSCSAG00000014728	PEAK1	pseudopodium enriched atypical kinase 1	28.7242	0.089902	0.0924614	0.972359	0.330872	0.99969	0.149699	0.920324	25.4326	41.6257	20.0045	27.8342
ENSCSAG00000001656	NRAS	NRAS proto-oncogene, GTPase	79.5006	0.0897919	0.114577	0.783465	0.433354	0.99969	0.245748	0.949905	75.2381	97.1265	75.5725	70.0654
ENSCSAG00000008723	SLC1A1	solute carrier family 1 member 1	22.3246	0.0897903	0.087068	1.03377	0.301241	0.99969	0.125625	0.906483	21.1938	32.0864	17.7818	18.2362
ENSCSAG00000009834		DExD/H-box helicase 58	19.1919	0.0897475	0.0813557	1.10682	0.26837	0.99969	0.101045	0.886321	15.8954	31.2192	13.3363	16.3166
ENSCSAG00000006444	C19orf53	chromosome unknown C19orf53 homolog	86.812	0.0896952	0.114738	0.782202	0.434096	0.99969	0.24651	0.950052	109.148	79.7825	70.0157	88.3016
ENSCSAG00000008754	CFAP92		24.1692	0.0896371	0.0892348	1.00996	0.312514	0.99969	0.134574	0.912156	33.9101	23.4144	21.1158	18.2362
ENSCSAG00000015594	UVSSA	UV stimulated scaffold protein A	24.4436	0.0895646	0.0905215	0.992918	0.32075	0.99969	0.141276	0.915973	30.7311	26.8832	20.0045	20.1558
ENSCSAG00000003612	USP44	ubiquitin specific peptidase 44	98.5362	0.089542	0.116739	0.766498	0.44338	0.99969	0.256123	0.951837	100.671	111.869	78.9065	102.699
ENSCSAG00000015278	SYT14		39.7367	0.0894198	0.101543	0.8802	0.378751	0.99969	0.192214	0.936834	41.328	48.5633	27.784	41.2714
ENSCSAG00000009478	CRTAP		402.333	0.0894005	0.115507	0.774018	0.43892	0.99969	0.251488	0.950992	423.877	420.593	393.421	371.443
ENSCSAG00000016198	RNF181	ring finger protein 181	81.1467	0.0893714	0.113281	0.790516	0.429226	0.99969	0.241524	0.949074	105.969	71.1105	82.2406	65.2664
ENSCSAG00000017487	RNMT	RNA guanine-7 methyltransferase	258.586	0.0893591	0.11851	0.753736	0.451008	0.99969	0.264125	0.953227	250.087	295.716	232.274	256.267
ENSCSAG00000005039			60.1774	0.0892968	0.110973	0.805125	0.420748	0.99969	0.232936	0.947295	62.5218	69.3761	58.9021	49.9096
ENSCSAG00000015164	CDKL1	cyclin dependent kinase like 1	83.3583	0.0892512	0.115522	0.772754	0.439668	0.99969	0.252263	0.951136	84.7754	95.3921	82.2406	71.0252
ENSCSAG00000004214	FRS2	fibroblast growth factor receptor substrate 2	242.656	0.0892272	0.118827	0.750553	0.452922	0.99969	0.266147	0.953566	236.311	276.637	210.047	247.628
ENSCSAG00000018448	MARVELD1	MARVEL domain containing 1	21.8854	0.089201	0.0845352	1.06464	0.287037	0.99969	0.114722	0.898498	33.9101	19.0784	21.1158	13.4372
ENSCSAG00000009416	SUSD5		73.1507	0.0891958	0.112294	0.795618	0.426254	0.99969	0.2385	0.948461	81.5963	78.0481	81.1293	51.8292
ENSCSAG00000014307	VPS53	VPS53 subunit of GARP complex	99.2034	0.0891073	0.117163	0.760933	0.446697	0.99969	0.259592	0.952449	116.566	97.1265	90.0201	93.1006
ENSCSAG00000015419	NSL1	NSL1 component of MIS12 kinetochore complex	115.215	0.0889581	0.117747	0.754881	0.450321	0.99969	0.2634	0.953105	110.208	137.018	95.5769	118.055
ENSCSAG00000011136	NAA38	N-alpha-acetyltransferase 38, NatC auxiliary subunit	136.418	0.0889517	0.11578	0.769799	0.441419	0.99969	0.254081	0.951468	176.969	117.939	156.702	94.0604
ENSCSAG00000012334	HSDL2		507.675	0.0888259	0.114462	0.775949	0.437779	0.99969	0.250307	0.950773	531.965	532.462	455.657	510.614
ENSCSAG00000002991	C12orf45		40.2118	0.088783	0.102903	0.864039	0.387567	0.99969	0.200506	0.939288	43.4474	46.8289	38.8976	31.6734
ENSCSAG00000016076	CDCA2	cell division cycle associated 2	70.3133	0.0887256	0.113559	0.781134	0.434724	0.99969	0.247156	0.950176	74.1785	78.9153	60.0134	68.1458
ENSCSAG00000014710	PELI1	pellino E3 ubiquitin protein ligase 1	316.436	0.0886771	0.118104	0.750563	0.452915	0.99969	0.266141	0.953565	294.594	372.029	290.065	309.056
ENSCSAG00000012692		diphosphoinositol polyphosphate phosphohydrolase 3-beta	27.576	0.0886443	0.0915118	0.970849	0.331624	0.99969	0.150333	0.920633	37.0892	27.7504	16.6704	28.794
ENSCSAG00000003196	STAT5A		31.5133	0.0884935	0.0968956	0.915947	0.359695	0.99969	0.174776	0.930967	40.2683	32.0864	27.784	25.9146
ENSCSAG00000017925	MOSPD3	motile sperm domain containing 3	49.7339	0.0884664	0.107638	0.822348	0.410879	0.99969	0.223092	0.945097	51.9249	58.1025	46.6771	42.2312
ENSCSAG00000005155	RBM20	RNA binding motif protein 20	45.7795	0.0883813	0.106141	0.833095	0.404791	0.99969	0.217103	0.943668	49.8055	52.0321	40.0089	41.2714
ENSCSAG00000014693	ZNF335	zinc finger protein 335	76.6351	0.0883656	0.114685	0.770594	0.440948	0.99969	0.253591	0.951379	78.4172	87.5873	73.3497	67.186
ENSCSAG00000002994	CENPU	centromere protein U	38.3762	0.0882335	0.0996757	0.8867	0.37524	0.99969	0.188952	0.935814	51.9249	35.5553	26.6726	39.3518
ENSCSAG00000009197	BPGM	bisphosphoglycerate mutase	43.9661	0.0881615	0.104746	0.843317	0.399051	0.99969	0.211514	0.942265	54.0443	44.2273	41.1203	36.4724
ENSCSAG00000011813	ZBTB37	zinc finger and BTB domain containing 37	15.2267	0.0881277	0.0758788	1.17047	0.24181	0.99969	0.0828984	0.864801	22.2535	16.4768	7.77952	14.397
ENSCSAG00000006462	EFHD1	EF-hand domain family member D1	37.6588	0.0880136	0.100134	0.878483	0.379682	0.99969	0.193083	0.937101	34.9698	50.2977	28.8953	36.4724
ENSCSAG00000007435	SLC35B3	solute carrier family 35 member B3	97.4579	0.0880065	0.116693	0.7536	0.451089	0.99969	0.264211	0.953242	95.3723	114.471	81.1293	98.8594
ENSCSAG00000007581	RUFY2	RUN and FYVE domain containing 2	46.057	0.0879802	0.105138	0.83659	0.402823	0.99969	0.21518	0.943193	50.8652	52.0321	33.3408	47.99
ENSCSAG00000002896	PRDM4	PR/SET domain 4	41.4548	0.0879372	0.102924	0.854111	0.393043	0.99969	0.205726	0.940737	39.2086	53.7665	34.4521	38.392
ENSCSAG00000013706	NET1	neuroepithelial cell transforming 1	107.042	0.0878814	0.117671	0.74643	0.455407	0.99969	0.268782	0.954001	109.148	120.541	90.0201	108.457
ENSCSAG00000009612	UBTD2	ubiquitin domain containing 2	94.9269	0.0878492	0.115407	0.762278	0.445894	0.99969	0.25875	0.952302	107.029	97.9937	105.579	69.1056
ENSCSAG00000016302	RNF217		73.7649	0.0878371	0.11256	0.779592	0.435631	0.99969	0.24809	0.950354	75.2381	85.8529	53.3453	80.6232
ENSCSAG00000005558	MRPL43	mitochondrial ribosomal protein L43	52.5487	0.0878262	0.10507	0.838846	0.401556	0.99969	0.213946	0.942884	73.1188	44.2273	54.4566	38.392
ENSCSAG00000007007	UPK1B	uroplakin 1B	173.034	0.0877939	0.119242	0.736648	0.461336	0.99969	0.275107	0.95501	198.162	169.104	172.261	152.608
ENSCSAG00000008872	C21orf91	chromosome unknown C21orf91 homolog	85.477	0.0877753	0.11543	0.759953	0.447282	0.99969	0.260205	0.952556	80.5366	104.064	76.6838	80.6232
ENSCSAG00000011735	SLC25A26	solute carrier family 25 member 26	65.3564	0.0877467	0.111761	0.786024	0.431854	0.99969	0.244209	0.949605	81.5963	61.5713	57.7907	60.4674
ENSCSAG00000010555	RPS6KA6	ribosomal protein S6 kinase A6	265.66	0.0877164	0.118838	0.737745	0.460669	0.99969	0.274393	0.954899	258.565	302.653	221.161	280.262
ENSCSAG00000006631	ECHS1		183.234	0.0877047	0.119068	0.737263	0.460962	0.99969	0.274706	0.954948	229.953	160.432	182.263	160.287
ENSCSAG00000017750	ESD	esterase D	130.228	0.0875751	0.118785	0.737383	0.46089	0.99969	0.274628	0.954936	133.521	143.955	131.14	112.297
ENSCSAG00000011529	ARPP19	cAMP regulated phosphoprotein 19	19.9431	0.0874981	0.0827718	1.06018	0.289064	0.99969	0.116252	0.8997	24.3729	24.2816	10.0022	21.1156
ENSCSAG00000009336	SDCCAG8	SHH signaling and ciliogenesis regulator SDCCAG8	251.748	0.0874728	0.11822	0.739783	0.459432	0.99969	0.273069	0.95469	261.744	268.832	227.829	248.588
ENSCSAG00000017433	DCUN1D2		18.8405	0.0874693	0.082943	1.05874	0.289716	0.99969	0.116746	0.900082	23.3132	22.5472	12.225	17.2764
ENSCSAG00000018225	CYB5A		78.6119	0.0874554	0.114504	0.763439	0.445202	0.99969	0.258026	0.952175	84.7754	85.8529	62.2361	81.583
ENSCSAG00000004252	TRIM21	tripartite motif containing 21	14.6194	0.0874273	0.0731633	1.21288	0.225175	0.99969	0.0723455	0.848076	26.4923	11.2736	11.1136	9.598
ENSCSAG00000014840	CYBRD1	cytochrome b reductase 1	438.187	0.0873887	0.118286	0.738481	0.460222	0.99969	0.273914	0.954823	415.399	508.18	351.19	477.981
ENSCSAG00000008797		aldehyde dehydrogenase 3 family member B1	63.4063	0.0873553	0.111811	0.782035	0.434194	0.99969	0.246611	0.950071	69.9397	68.5089	63.3475	51.8292
ENSCSAG00000012321	PPM1L		22.0729	0.0873498	0.0851494	1.02764	0.304118	0.99969	0.127884	0.907983	25.4326	27.7504	11.1136	23.995
ENSCSAG00000012848	C8orf88	chromosome unknown C8orf88 homolog	148.87	0.0873224	0.118889	0.734027	0.462932	0.99969	0.276818	0.955276	135.641	181.245	135.586	143.01
ENSCSAG00000003762	METTL14	methyltransferase like 14	39.0938	0.087258	0.100174	0.870879	0.38382	0.99969	0.196965	0.938264	44.5071	44.2273	24.4499	43.191
ENSCSAG00000007955		ribosomal protein S15a	561.997	0.0872532	0.114106	0.764641	0.444485	0.99969	0.257277	0.952042	608.263	568.884	504.557	566.282
ENSCSAG00000012135	EIF2AK2		212.783	0.0872409	0.11924	0.731151	0.464687	0.99969	0.278705	0.955565	201.342	249.754	174.483	225.553
ENSCSAG00000006470	NECTIN3	nectin cell adhesion molecule 3	152.162	0.0872397	0.118873	0.73339	0.46332	0.99969	0.277235	0.95534	153.655	170.839	120.027	164.126
ENSCSAG00000015713	RRP15	ribosomal RNA processing 15 homolog	27.6149	0.0871621	0.0911279	0.962145	0.335977	0.99969	0.154024	0.922388	41.328	23.4144	25.5613	20.1558
ENSCSAG00000014595	PNISR		68.9556	0.0871123	0.1126	0.773252	0.439373	0.99969	0.251957	0.951079	74.1785	76.3137	53.3453	71.985
ENSCSAG00000012652	VPS50	VPS50 subunit of EARP/GARPII complex	186.741	0.0870556	0.119163	0.730717	0.464952	0.99969	0.27899	0.955609	198.162	196.855	187.82	164.126
ENSCSAG00000000378	KCNS3	potassium voltage-gated channel modifier subfamily S member 3	84.7991	0.0868703	0.115859	0.749974	0.45327	0.99969	0.266516	0.953628	96.432	86.7201	74.4611	81.583
ENSCSAG00000000892	CAMK2N1	calcium/calmodulin dependent protein kinase II inhibitor 1	74.5118	0.0868677	0.112222	0.775453	0.438072	0.99969	0.25061	0.950829	99.6111	63.3057	68.9043	66.2262
ENSCSAG00000004367	MRPL17	mitochondrial ribosomal protein L17	121.961	0.0868664	0.11542	0.754124	0.450775	0.99969	0.263879	0.953186	156.834	106.666	138.92	85.4222
ENSCSAG00000000950	TMEM50A	transmembrane protein 50A	116.419	0.086797	0.117854	0.736669	0.461324	0.99969	0.275093	0.955008	138.82	111.002	97.7996	118.055
ENSCSAG00000007886	ENOX2	ecto-NOX disulfide-thiol exchanger 2	29.8024	0.0867237	0.0952578	0.913308	0.361081	0.99969	0.176022	0.931422	39.2086	29.4848	25.5613	24.9548
ENSCSAG00000006015	COL8A1		107.163	0.0866885	0.116899	0.740854	0.458782	0.99969	0.272376	0.95458	97.4917	132.682	90.0201	108.457
ENSCSAG00000017054	N4BP2	NEDD4 binding protein 2	128.858	0.0866824	0.118734	0.729752	0.465542	0.99969	0.279625	0.955705	133.521	141.354	110.025	130.533
ENSCSAG00000011100			137.637	0.0866504	0.11831	0.731854	0.464258	0.99969	0.278243	0.955495	140.939	153.495	104.468	151.648
ENSCSAG00000009782	NUDT3	nudix hydrolase 3	73.5572	0.0865946	0.114055	0.759806	0.44737	0.99969	0.260298	0.952572	80.5366	78.9153	73.3497	61.4272
ENSCSAG00000001490	TLCD4	TLC domain containing 4	63.1381	0.0865646	0.111892	0.773967	0.438951	0.99969	0.251519	0.950998	65.7009	71.9777	61.1248	53.7488
ENSCSAG00000007410	ARID5B		400.407	0.0865522	0.118086	0.732665	0.463763	0.99969	0.277711	0.955414	387.847	455.281	325.628	432.87
ENSCSAG00000008604	CORO1B	coronin 1B	246.187	0.0865192	0.119227	0.726235	0.467695	0.99969	0.281949	0.956054	292.475	228.941	265.615	197.719
ENSCSAG00000013139	FAM53C	family with sequence similarity 53 member C	43.8674	0.0865007	0.103468	0.838403	0.401805	0.99969	0.214188	0.942945	52.9846	45.0945	46.6771	30.7136
ENSCSAG00000013729	TOP3B	DNA topoisomerase III beta	71.8084	0.0864855	0.113859	0.76012	0.447183	0.99969	0.260101	0.952538	79.4769	76.3137	70.0157	61.4272
ENSCSAG00000016335	TRMT11	tRNA methyltransferase 11 homolog	20.9426	0.0864638	0.0843554	1.02747	0.304197	0.99969	0.127946	0.908024	25.4326	25.1488	11.1136	22.0754
ENSCSAG00000003874	MAP3K3	mitogen-activated protein kinase kinase kinase 3	51.7787	0.0864257	0.107496	0.805246	0.420678	0.99969	0.232866	0.94728	56.1637	58.1025	54.4566	38.392
ENSCSAG00000014753	MINDY4	MINDY lysine 48 deubiquitinase 4	26.4427	0.0863471	0.0926378	0.93486	0.349861	0.99969	0.166041	0.927598	32.8505	28.6176	22.2272	22.0754
ENSCSAG00000013286	NEK4		87.4947	0.0863321	0.114137	0.755671	0.449847	0.99969	0.262901	0.95302	91.1335	98.8609	61.1248	98.8594
ENSCSAG00000015205	ADNP	activity dependent neuroprotector homeobox	516.652	0.0863144	0.116793	0.738801	0.460028	0.99969	0.273706	0.954791	485.339	599.236	444.544	537.488
ENSCSAG00000011139	PARP11	poly(ADP-ribose) polymerase family member 11	37.7515	0.0863142	0.101786	0.849164	0.39579	0.99969	0.208365	0.941444	42.3877	42.4929	34.4521	31.6734
ENSCSAG00000017670	CKAP2	cytoskeleton associated protein 2	295.505	0.0863098	0.118235	0.729693	0.465578	0.99969	0.279664	0.955711	289.296	333.005	254.501	305.217
ENSCSAG00000014524	ALDH7A1		223.987	0.0862876	0.118733	0.726919	0.467276	0.99969	0.281497	0.955987	247.968	224.605	218.938	204.437
ENSCSAG00000001149	ZFP69		13.0181	0.0862307	0.0730142	1.19369	0.232601	0.99969	0.0769773	0.8559	16.9551	16.4768	10.0022	8.6382
ENSCSAG00000014975	PIGA	phosphatidylinositol glycan anchor biosynthesis class A	43.0486	0.0862281	0.104733	0.823812	0.410046	0.99969	0.22227	0.944905	45.5668	50.2977	38.8976	37.4322
ENSCSAG00000012458	UQCRB	cytochrome b-c1 complex subunit 7	98.4272	0.0862127	0.117398	0.734552	0.462612	0.99969	0.276475	0.955223	107.029	104.064	93.3542	89.2614
ENSCSAG00000010778	CLIP4	CAP-Gly domain containing linker protein family member 4	1251.32	0.0861911	0.112189	0.768181	0.44238	0.99969	0.255081	0.951649	1210.17	1404	1106.91	1284.21
ENSCSAG00000005347	FAM118A	family with sequence similarity 118 member A	33.5707	0.0861604	0.0980117	0.88157	0.378009	0.99969	0.191523	0.936621	44.5071	32.0864	28.8953	28.794
ENSCSAG00000017219	PPIL4	peptidylprolyl isomerase like 4	55.5966	0.0860962	0.109327	0.787099	0.431224	0.99969	0.243565	0.949479	57.2234	65.0401	44.4544	55.6684
ENSCSAG00000012784	DHX33		59.5924	0.0860927	0.109691	0.786236	0.431729	0.99969	0.244082	0.94958	77.3575	53.7665	54.4566	52.789
ENSCSAG00000005858			26.2571	0.0860483	0.0916276	0.939753	0.347344	0.99969	0.163836	0.926695	26.4923	34.6881	18.8931	24.9548
ENSCSAG00000011435	ATXN7L1	ataxin 7 like 1	28.9296	0.0859855	0.094048	0.914477	0.360466	0.99969	0.175469	0.931221	28.6117	38.1569	21.1158	27.8342
ENSCSAG00000010040	IFT172		42.4796	0.0859683	0.102781	0.837281	0.402435	0.99969	0.214802	0.943099	40.2683	54.6337	43.343	31.6734
ENSCSAG00000013170	GFRA4		16.9789	0.0859382	0.079031	1.09731	0.272504	0.99969	0.104009	0.889202	26.4923	15.6096	13.3363	12.4774
ENSCSAG00000019082	H2AC14	histone H2A type 1-J	178.152	0.0859137	0.119224	0.720938	0.470948	0.99969	0.285474	0.956573	187.566	189.917	191.154	143.97
ENSCSAG00000007747	KNOP1	lysine rich nucleolar protein 1	65.6498	0.0858934	0.112039	0.76742	0.442832	0.99969	0.255552	0.951734	70.9994	71.9777	67.7929	51.8292
ENSCSAG00000006190	MAPK3	mitogen-activated protein kinase 3	65.4861	0.0858779	0.110557	0.777237	0.437019	0.99969	0.249521	0.950625	61.4621	81.5169	70.0157	48.9498
ENSCSAG00000010945	TRMO	tRNA methyltransferase O	41.3857	0.0858709	0.103961	0.826663	0.408428	0.99969	0.220673	0.944529	45.5668	46.8289	36.6749	36.4724
ENSCSAG00000014099	PML	PML nuclear body scaffold	29.9365	0.0858639	0.0946634	0.910658	0.362476	0.99969	0.177279	0.931875	41.328	27.7504	26.6726	23.995
ENSCSAG00000012515	PCDHB8		21.4168	0.0858375	0.0863179	0.996433	0.31904	0.99969	0.139874	0.915202	23.3132	27.7504	14.4477	20.1558
ENSCSAG00000009567	TMSB15A	thymosin beta 15A	9.75462	0.0858207	0.0651969	1.33988	0.180283	0.99969	0.0471334	0.784336	12.7163	13.8752	6.66816	5.7588
ENSCSAG00000003255	BCAM	basal cell adhesion molecule (Lutheran blood group)	1498.94	0.085793	0.110489	0.776547	0.437426	0.99969	0.249942	0.950704	1678.55	1449.09	1493.67	1374.43
ENSCSAG00000001099	EVA1B	eva-1 homolog B	197.004	0.0857773	0.118594	0.724187	0.468951	0.99969	0.283309	0.956256	245.849	174.307	220.049	147.809
ENSCSAG00000012536	INTS8	integrator complex subunit 8	86.4333	0.085747	0.115288	0.743363	0.457262	0.99969	0.270755	0.95432	93.2529	93.6577	66.6816	92.1408
ENSCSAG00000006629	COPS7B	COP9 signalosome subunit 7B	20.7409	0.0856739	0.0853732	1.00908	0.312937	0.99969	0.134915	0.912359	24.3729	25.1488	20.0045	13.4372
ENSCSAG00000013290	ARG2	arginase 2	24.2852	0.0856536	0.0897518	0.957963	0.338081	0.99969	0.155821	0.923214	32.8505	24.2816	18.8931	21.1156
ENSCSAG00000000619			136.329	0.0856421	0.118759	0.72109	0.470854	0.99969	0.285373	0.956559	154.715	136.151	113.359	141.091
ENSCSAG00000019751	CHST14	carbohydrate sulfotransferase 14	20.3827	0.0856015	0.0853526	1.00649	0.314181	0.99969	0.13592	0.91295	25.4326	23.4144	14.4477	18.2362
ENSCSAG00000003655			19.8264	0.0855672	0.0834174	1.02787	0.304013	0.99969	0.127801	0.907929	20.1342	27.7504	12.225	19.196
ENSCSAG00000004087	ZFP90	ZFP90 zinc finger protein	69.5761	0.0855634	0.11174	0.765221	0.44414	0.99969	0.256916	0.951978	60.4025	91.0561	64.4589	62.387
ENSCSAG00000010255	GPR162	G protein-coupled receptor 162	30.5958	0.0855549	0.09635	0.888773	0.374125	0.99969	0.18792	0.935484	31.7908	38.1569	25.5613	26.8744
ENSCSAG00000011752	PRTG		76.651	0.085521	0.114868	0.744508	0.456569	0.99969	0.270018	0.954201	81.5963	84.1185	68.9043	71.985
ENSCSAG00000018289	ASL	argininosuccinate lyase	1361.1	0.0855192	0.0809612	1.06786	0.285585	0.99969	0.113631	0.897623	1896.85	1429.15	641.254	1477.13
ENSCSAG00000003868			18.3875	0.0854615	0.0814714	1.05292	0.292379	0.99969	0.118773	0.901619	16.9551	27.7504	14.4477	14.397
ENSCSAG00000003330	EZH1	enhancer of zeste 1 polycomb repressive complex 2 subunit	17.2432	0.0854125	0.0808745	1.06246	0.288028	0.99969	0.115469	0.899088	22.2535	19.9456	13.3363	13.4372
ENSCSAG00000005294			8.13657	0.0853883	0.0591842	1.47774	0.139478	0.99969	0.0285725	0.687955	10.5969	13.008	2.22272	6.7186
ENSCSAG00000008639	BCL2L14	BCL2 like 14	13.3991	0.0853809	0.0734808	1.17119	0.241521	0.99969	0.0827095	0.864534	16.9551	17.344	7.77952	11.5176
ENSCSAG00000006104	AKAP8		62.6027	0.0853682	0.110664	0.772877	0.439595	0.99969	0.252187	0.951122	76.2978	60.7041	64.4589	48.9498
ENSCSAG00000011160	RBP1		54.4941	0.0853067	0.108087	0.790464	0.429257	0.99969	0.241555	0.94908	70.9994	49.4305	46.6771	50.8694
ENSCSAG00000006374	LAT	linker for activation of T cells	20.3448	0.0852968	0.0849567	1.00725	0.313815	0.99969	0.135625	0.912777	25.4326	23.4144	13.3363	19.196
ENSCSAG00000009424	PRXL2A		188.081	0.0851988	0.119174	0.715118	0.474536	0.99969	0.289381	0.957135	214.058	183.847	177.818	176.603
ENSCSAG00000005691	ARFGAP2	ADP ribosylation factor GTPase activating protein 2	111.358	0.0851903	0.117904	0.72309	0.469624	0.99969	0.284039	0.956363	127.163	111.002	112.247	95.0202
ENSCSAG00000004240	PRKAR1A	protein kinase cAMP-dependent type I regulatory subunit alpha	191.723	0.085176	0.119054	0.7155	0.4743	0.99969	0.289124	0.957098	204.521	200.323	184.486	177.563
ENSCSAG00000000997	IFI6	interferon alpha inducible protein 6	17.6587	0.0851471	0.0802264	1.06468	0.287022	0.99969	0.114711	0.898489	19.0745	24.2816	10.0022	17.2764
ENSCSAG00000013242	RBM3	RNA binding motif protein 3	669.732	0.0851352	0.112176	0.758922	0.447899	0.99969	0.260853	0.952668	705.755	692.894	625.695	654.584
ENSCSAG00000000186	CITED2	Cbp/p300 interacting transactivator with Glu/Asp rich carboxy-terminal domain 2	103.048	0.085032	0.117278	0.72469	0.468642	0.99969	0.282974	0.956207	97.4917	123.143	95.5769	95.98
ENSCSAG00000018445	ZNF518A	zinc finger protein 518A	77.396	0.0850294	0.11368	0.747207	0.454939	0.99969	0.268285	0.953919	74.1785	93.6577	61.1248	80.6232
ENSCSAG00000002023	RUSC1	RUN and SH3 domain containing 1	47.2972	0.085018	0.102438	0.833016	0.404836	0.99969	0.217146	0.943678	57.2234	48.5633	55.568	27.8342
ENSCSAG00000006643			179.538	0.0849997	0.119042	0.714731	0.474775	0.99969	0.289642	0.957172	220.416	161.299	186.708	149.729
ENSCSAG00000015651	SPTSSA	serine palmitoyltransferase small subunit A	82.4258	0.084987	0.114866	0.739287	0.459732	0.99969	0.27339	0.954741	77.3575	100.595	71.127	80.6232
ENSCSAG00000011996	IFT43	intraflagellar transport 43	38.2462	0.0849276	0.102037	0.833442	0.404596	0.99969	0.216912	0.943621	42.3877	43.3601	35.5635	31.6734
ENSCSAG00000009498	MFAP1	microfibril associated protein 1	90.7438	0.0849018	0.11634	0.730077	0.465343	0.99969	0.279412	0.955673	94.3126	100.595	92.2428	75.8242
ENSCSAG00000008836	GRINA	glutamate ionotropic receptor NMDA type subunit associated protein 1	112.551	0.0848974	0.117794	0.720242	0.471376	0.99969	0.285939	0.956641	113.387	127.479	92.2428	117.096
ENSCSAG00000017545	NAPG	NSF attachment protein gamma	49.3072	0.0848857	0.107381	0.790458	0.42926	0.99969	0.241559	0.94908	49.8055	58.9697	43.343	45.1106
ENSCSAG00000010731	TOGARAM2		52.6324	0.0848143	0.108936	0.779132	0.435902	0.99969	0.248369	0.950407	59.3428	56.3681	47.7885	47.0302
ENSCSAG00000008527	ATF7IP2	activating transcription factor 7 interacting protein 2	62.9333	0.0847912	0.108189	0.782944	0.43366	0.99969	0.246062	0.949966	67.8203	71.1105	38.8976	73.9046
ENSCSAG00000010445	RPL26	ribosomal protein L26	515.251	0.0847617	0.115847	0.731574	0.464429	0.99969	0.278427	0.955523	551.04	528.993	436.764	544.207
ENSCSAG00000007671			44.2644	0.0846956	0.104614	0.81118	0.417262	0.99969	0.229441	0.946535	56.1637	42.4929	40.0089	38.392
ENSCSAG00000012565	ZNF618		67.9414	0.0846922	0.11217	0.755903	0.449708	0.99969	0.262755	0.952995	73.1188	74.5793	72.2384	51.8292
ENSCSAG00000011363	BCAP29	B cell receptor associated protein 29	109.045	0.0846845	0.117651	0.719301	0.471956	0.99969	0.28657	0.956732	104.91	128.346	94.4656	108.457
ENSCSAG00000001496	SNX7		179.291	0.0846223	0.119238	0.7099	0.477766	0.99969	0.292915	0.95763	183.327	195.987	190.042	147.809
ENSCSAG00000011745	NLGN2	neuroligin 2	71.8248	0.0846175	0.113894	0.742839	0.457579	0.99969	0.271092	0.954375	73.1188	82.3841	65.5702	66.2262
ENSCSAG00000007379	ANK3		92.7818	0.0846055	0.116074	0.728291	0.466436	0.99969	0.280589	0.955851	92.1932	107.533	74.4611	96.9398
ENSCSAG00000005783	RAB8A	RAB8A, member RAS oncogene family	139.026	0.0845569	0.118896	0.711578	0.476726	0.99969	0.291775	0.957471	151.536	143.955	144.477	116.136
ENSCSAG00000003614	EFTUD2	elongation factor Tu GTP binding domain containing 2	480.633	0.0845197	0.114377	0.738979	0.45992	0.99969	0.273591	0.954772	517.13	488.234	454.546	462.624
ENSCSAG00000003293	TMEM131L	transmembrane 131 like	27.8232	0.0844846	0.0937936	0.902414	0.366837	0.99969	0.181233	0.933262	33.9101	30.352	21.1158	25.9146
ENSCSAG00000011046	GPR161		44.9301	0.0842668	0.105085	0.802466	0.422283	0.99969	0.234483	0.947624	54.0443	45.9617	35.5635	44.1508
ENSCSAG00000014365	EFEMP1	EGF containing fibulin extracellular matrix protein 1	662.873	0.0841889	0.114706	0.733805	0.463068	0.99969	0.276964	0.955299	648.532	737.988	576.796	688.177
ENSCSAG00000001166	CCDC30		27.3669	0.084181	0.0919047	0.916237	0.359543	0.99969	0.174639	0.930917	24.3729	39.0241	21.1158	24.9548
ENSCSAG00000000244			541.522	0.0841599	0.115783	0.726822	0.467335	0.99969	0.281561	0.955996	594.487	540.266	461.214	570.121
ENSCSAG00000010875	MED30	mediator complex subunit 30	119.407	0.0841451	0.11832	0.71148	0.476787	0.99969	0.291842	0.957481	126.103	128.346	123.361	99.8192
ENSCSAG00000001324	OMA1	OMA1 zinc metallopeptidase	39.7127	0.08414	0.10302	0.817591	0.413591	0.99969	0.225781	0.945715	44.5071	44.2273	35.5635	34.5528
ENSCSAG00000001816	MRPL9	mitochondrial ribosomal protein L9	168.516	0.0841354	0.119242	0.70585	0.480281	0.99969	0.295677	0.958009	187.566	169.104	166.704	150.689
ENSCSAG00000005119	REST	RE1 silencing transcription factor	521.139	0.0840846	0.115027	0.73085	0.464871	0.99969	0.278903	0.955596	517.13	573.22	463.437	530.77
ENSCSAG00000017060	RBM47	RNA binding motif protein 47	221.201	0.0840846	0.119084	0.705765	0.480334	0.99969	0.295735	0.958017	222.535	244.551	184.486	233.231
ENSCSAG00000009830	EIF2B4	eukaryotic translation initiation factor 2B subunit delta	56.391	0.0840496	0.109535	0.767186	0.442971	0.99969	0.255697	0.95176	54.0443	69.3761	52.2339	49.9096
ENSCSAG00000001329			14.1517	0.0839941	0.0747386	1.13623	0.25586	0.99969	0.0923022	0.876879	20.1342	15.6096	12.225	8.6382
ENSCSAG00000019091	H2AC7	histone H2A type 1-D	342.397	0.0839695	0.11816	0.71094	0.477121	0.99969	0.292208	0.957532	381.489	338.208	366.749	283.141
ENSCSAG00000009986	CLUAP1		38.1461	0.0839644	0.101774	0.826406	0.408574	0.99969	0.220817	0.944563	46.6265	39.0241	33.3408	33.593
ENSCSAG00000009390	DENND4C	DENN domain containing 4C	217.125	0.0839483	0.118824	0.706298	0.480003	0.99969	0.29537	0.957967	217.237	240.215	198.933	212.116
ENSCSAG00000005975	LIMA1	LIM domain and actin binding 1	133.914	0.083926	0.118876	0.705752	0.480343	0.99969	0.295744	0.958018	140.939	143.955	114.47	136.292
ENSCSAG00000015788	OSBPL2	oxysterol binding protein like 2	88.7049	0.0838669	0.115908	0.724126	0.468988	0.99969	0.283349	0.956262	107.029	84.1185	81.1293	82.5428
ENSCSAG00000011965	PSMD6		224.038	0.0838611	0.118886	0.705228	0.480668	0.99969	0.296103	0.958067	238.431	234.144	192.265	231.312
ENSCSAG00000004587	CTR9	CTR9 homolog, Paf1/RNA polymerase II complex component	96.8527	0.0838427	0.117216	0.715353	0.474391	0.99969	0.289223	0.957112	107.029	100.595	86.686	93.1006
ENSCSAG00000007189	TMEM185A	transmembrane protein 185A	16.835	0.0838387	0.0779614	1.08067	0.279842	0.99969	0.109362	0.89405	13.776	27.7504	13.3363	12.4774
ENSCSAG00000008704	RFX3	regulatory factor X3	39.9835	0.0838228	0.0996123	0.840496	0.40063	0.99969	0.213046	0.942657	39.2086	51.1649	24.4499	45.1106
ENSCSAG00000007138	ADAM17	ADAM metallopeptidase domain 17	137.382	0.0838109	0.119062	0.703966	0.481454	0.99969	0.296968	0.958184	144.118	147.424	132.252	125.734
ENSCSAG00000006214	SLC35G1	solute carrier family 35 member G1	78.7585	0.0837973	0.113994	0.734931	0.462382	0.99969	0.276227	0.955185	72.0591	97.9937	77.7952	67.186
ENSCSAG00000011041	DCAF6	DDB1 and CUL4 associated factor 6	344.154	0.0837177	0.117168	0.714308	0.475037	0.99969	0.289928	0.957212	335.922	385.905	311.181	343.609
ENSCSAG00000019699	HS3ST1	heparan sulfate-glucosamine 3-sulfotransferase 1	18.2636	0.0837016	0.0804629	1.04306	0.296919	0.99969	0.122262	0.904158	15.8954	28.6176	12.225	16.3166
ENSCSAG00000002068	C12orf65	chromosome unknown C12orf65 homolog	14.1036	0.0836962	0.0748414	1.12996	0.258492	0.99969	0.094113	0.878961	19.0745	16.4768	12.225	8.6382
ENSCSAG00000016009			14.1625	0.0836852	0.0732486	1.15159	0.249488	0.99969	0.0879824	0.87161	11.6566	24.2816	11.1136	9.598
ENSCSAG00000011142	MRPS22	mitochondrial ribosomal protein S22	73.3366	0.0836256	0.113798	0.735664	0.461936	0.99969	0.275749	0.955111	86.8948	71.9777	71.127	63.3468
ENSCSAG00000013160	PHYH	phytanoyl-CoA 2-hydroxylase	91.4978	0.0835993	0.116649	0.71646	0.473708	0.99969	0.288477	0.957006	92.1932	104.064	83.352	86.382
ENSCSAG00000008446	MED9	mediator complex subunit 9	57.6685	0.0835801	0.110031	0.760652	0.446865	0.99969	0.259768	0.95248	69.9397	56.3681	54.4566	49.9096
ENSCSAG00000014426	PHEX		25.2673	0.0835426	0.0893253	0.938413	0.348032	0.99969	0.164437	0.926944	36.0295	23.4144	16.6704	24.9548
ENSCSAG00000003138			18.7199	0.0835364	0.0824262	1.01814	0.308613	0.99969	0.131448	0.910254	25.4326	19.9456	12.225	17.2764
ENSCSAG00000006959	KRBA1		19.1159	0.0835023	0.0827124	1.01683	0.309233	0.99969	0.131943	0.910561	24.3729	21.68	18.8931	11.5176
ENSCSAG00000015890	SUCLG1		357.327	0.0834952	0.116229	0.718335	0.472551	0.99969	0.287217	0.956826	378.31	370.295	332.297	348.408
ENSCSAG00000006323	USP40	ubiquitin specific peptidase 40	78.8416	0.08349	0.114616	0.728073	0.466569	0.99969	0.280733	0.955872	83.7157	86.7201	63.3475	81.583
ENSCSAG00000015941	CDC25A		77.706	0.0834528	0.114183	0.731769	0.46431	0.99969	0.278299	0.955504	95.3723	72.8449	74.4611	68.1458
ENSCSAG00000007079	KATNBL1	katanin regulatory subunit B1 like 1	39.1179	0.0834409	0.102061	0.818753	0.412927	0.99969	0.225122	0.945565	48.7458	39.0241	32.2294	36.4724
ENSCSAG00000006318	NDUFB7	NADH:ubiquinone oxidoreductase subunit B7	146.47	0.0834181	0.117654	0.709961	0.477728	0.99969	0.292873	0.957624	193.924	119.674	145.588	126.694
ENSCSAG00000014032			154.566	0.0832476	0.119192	0.698543	0.484838	0.99969	0.300705	0.958682	158.954	168.237	156.702	134.372
ENSCSAG00000015775	RAD17	RAD17 checkpoint clamp loader component	50.9734	0.0831091	0.108172	0.768616	0.442122	0.99969	0.254812	0.951601	52.9846	58.9697	47.7885	44.1508
ENSCSAG00000005909	TFCP2	transcription factor CP2	201.147	0.0830973	0.119044	0.697883	0.48525	0.99969	0.301161	0.958742	211.938	212.464	176.706	203.478
ENSCSAG00000001047	CCDC28B	coiled-coil domain containing 28B	25.3605	0.0830837	0.0909343	0.917432	0.358916	0.99969	0.174077	0.930709	33.9101	25.1488	22.2272	20.1558
ENSCSAG00000012220		mitochondrial ribosomal protein L14	43.7469	0.0830747	0.102984	0.809231	0.418383	0.99969	0.230562	0.946781	55.104	42.4929	46.6771	30.7136
ENSCSAG00000018280	KCTD7		46.6001	0.0830054	0.106534	0.779632	0.435607	0.99969	0.248066	0.95035	50.8652	52.0321	42.2317	41.2714
ENSCSAG00000012395	GNPDA1	glucosamine-6-phosphate deaminase 1	165.615	0.0829659	0.119219	0.696008	0.486424	0.99969	0.302462	0.958912	166.372	183.847	171.149	141.091
ENSCSAG00000005455		homeobox C10	28.2697	0.0829494	0.0944256	0.87978	0.378979	0.99969	0.192427	0.9369	32.8505	32.0864	22.2272	25.9146
ENSCSAG00000010824	PBDC1	polysaccharide biosynthesis domain containing 1	31.0423	0.0829333	0.0964495	0.860447	0.389543	0.99969	0.202383	0.939817	30.7311	39.8913	26.6726	26.8744
ENSCSAG00000016423	SNAP47	synaptosome associated protein 47	54.4546	0.0828921	0.108022	0.768826	0.441997	0.99969	0.254682	0.951577	61.4621	58.1025	58.9021	39.3518
ENSCSAG00000007549	RAD51	RAD51 recombinase	33.2174	0.0828916	0.0971106	0.856867	0.391518	0.99969	0.204267	0.940339	43.4474	32.0864	33.3408	23.995
ENSCSAG00000002741	MMAB	metabolism of cobalamin associated B	35.423	0.0828702	0.0987112	0.842466	0.399527	0.99969	0.211976	0.942384	44.5071	35.5553	36.6749	24.9548
ENSCSAG00000008214		ribosomal protein L8	490.231	0.0828469	0.114927	0.720775	0.471048	0.99969	0.285583	0.956589	511.831	513.383	435.653	500.056
ENSCSAG00000010740	TAF9B	TATA-box binding protein associated factor 9b	21.3167	0.0828449	0.0851369	0.975677	0.329224	0.99969	0.148315	0.91964	27.552	23.4144	12.225	22.0754
ENSCSAG00000013646	TCF7	transcription factor 7	9.05341	0.0828026	0.0629319	1.34042	0.18011	0.99969	0.0470457	0.784021	13.776	11.2736	4.44544	6.7186
ENSCSAG00000017371	CIAO1	cytosolic iron-sulfur assembly component 1	115.284	0.0827974	0.117624	0.704692	0.481002	0.99969	0.29647	0.958117	139.879	106.666	116.693	97.8996
ENSCSAG00000000265	TLR5	toll like receptor 5	14.5158	0.082742	0.0728351	1.14206	0.253431	0.99969	0.0906444	0.874909	12.7163	24.2816	6.66816	14.397
ENSCSAG00000012386		asparagine synthetase domain containing 1	110.433	0.0826814	0.118188	0.699645	0.484149	0.99969	0.299942	0.958581	116.566	118.807	105.579	100.779
ENSCSAG00000001660	SIKE1	suppressor of IKBKE 1	254.656	0.0826239	0.118272	0.698531	0.484845	0.99969	0.300713	0.958683	274.46	261.028	227.829	255.307
ENSCSAG00000006762	MTMR10	myotubularin related protein 10	588.775	0.0825902	0.116065	0.711391	0.476842	0.99969	0.291902	0.957489	553.159	679.019	513.448	609.473
ENSCSAG00000010341	CYP20A1	cytochrome P450 family 20 subfamily A member 1	45.4903	0.0825231	0.105908	0.779936	0.435428	0.99969	0.247881	0.950315	52.9846	47.6961	40.0089	41.2714
ENSCSAG00000013597	FBXO11	F-box protein 11	136.675	0.0825037	0.118187	0.697465	0.485512	0.99969	0.301451	0.95878	134.581	156.963	104.468	150.689
ENSCSAG00000001881	GATAD2B	GATA zinc finger domain containing 2B	77.0315	0.0825019	0.114434	0.7213	0.470725	0.99969	0.285232	0.956538	91.1335	75.4465	66.6816	74.8644
ENSCSAG00000004334		chromosome unknown C4orf36 homolog	29.4174	0.0824946	0.0953891	0.865877	0.386558	0.99969	0.199549	0.939015	30.7311	36.4225	25.5613	24.9548
ENSCSAG00000013922	EFHC2	EF-hand domain containing 2	80.8408	0.0824754	0.112999	0.728933	0.466043	0.99969	0.280166	0.955787	77.3575	97.9937	57.7907	90.2212
ENSCSAG00000001185	SZT2		53.9419	0.0824614	0.108908	0.757972	0.448467	0.99969	0.26145	0.952771	58.2831	59.8369	54.4566	43.191
ENSCSAG00000016682	PAX8	paired box 8	268.499	0.0824336	0.117849	0.699459	0.484265	0.99969	0.300071	0.958598	275.52	287.911	260.058	250.508
ENSCSAG00000005769	FAM32A	family with sequence similarity 32 member A	236.578	0.082383	0.11896	0.692887	0.488381	0.99969	0.304635	0.959193	271.281	227.207	243.388	204.437
ENSCSAG00000011525	KIFAP3		69.7043	0.082298	0.112625	0.730092	0.465334	0.99969	0.279401	0.955671	68.88	82.3841	55.568	71.985
ENSCSAG00000018503	RMI1	RecQ mediated genome instability 1	51.1444	0.0822837	0.107772	0.763088	0.445411	0.99969	0.258245	0.952213	50.8652	61.5713	42.2317	49.9096
ENSCSAG00000015165	EFL1	elongation factor like GTPase 1	172.966	0.0822692	0.119231	0.690132	0.490111	0.99969	0.306562	0.959439	193.924	171.706	161.147	165.086
ENSCSAG00000009194	TCN2	transcobalamin 2	213.2	0.0822434	0.118849	0.692152	0.488842	0.99969	0.305149	0.959259	232.073	216.8	210.047	193.88
ENSCSAG00000003881	LIMD2	LIM domain containing 2	49.2223	0.082217	0.104362	0.79043	0.429277	0.99969	0.241575	0.949084	67.8203	41.6257	50.0112	37.4322
ENSCSAG00000001398	ZZZ3	zinc finger ZZ-type containing 3	182.116	0.0821236	0.119236	0.688441	0.491175	0.99969	0.307749	0.95959	185.446	199.456	154.479	189.081
ENSCSAG00000018150	FECH	ferrochelatase	136.569	0.0820556	0.119013	0.689319	0.490622	0.99969	0.307132	0.959512	144.118	145.69	121.138	135.332
ENSCSAG00000009059	IFT122	intraflagellar transport 122	158.743	0.0820444	0.119223	0.68841	0.491195	0.99969	0.307771	0.959592	172.73	163.034	160.036	139.171
ENSCSAG00000010425	ERCC6	DNA excision repair protein ERCC-6	102.591	0.0819365	0.114307	0.71599	0.473998	0.99969	0.288794	0.957051	103.85	117.939	66.6816	121.895
ENSCSAG00000003288	SESN3	sestrin 3	20.2281	0.0819306	0.0850585	0.96567	0.334209	0.99969	0.152521	0.921683	21.1938	26.8832	15.559	17.2764
ENSCSAG00000001762	POLR3C	RNA polymerase III subunit C	71.7996	0.081911	0.113301	0.722443	0.470022	0.99969	0.28447	0.956427	73.1188	82.3841	57.7907	73.9046
ENSCSAG00000013314	STOM	stomatin	84.5711	0.0818658	0.115378	0.709237	0.478177	0.99969	0.293366	0.957692	91.1335	91.0561	67.7929	88.3016
ENSCSAG00000004968	RASL11B	RAS like family 11 member B	36.3394	0.081829	0.0998596	0.819352	0.412586	0.99969	0.224783	0.945487	33.9101	47.6961	31.1181	32.6332
ENSCSAG00000011226	NDUFB10	NADH:ubiquinone oxidoreductase subunit B10	147.183	0.0818195	0.118374	0.691983	0.488948	0.99969	0.305267	0.959274	172.73	140.487	162.259	113.256
ENSCSAG00000015996	CSPG5	chondroitin sulfate proteoglycan 5	22.6879	0.0818123	0.0875058	0.939937	0.34725	0.99969	0.163753	0.926661	31.7908	21.68	20.0045	17.2764
ENSCSAG00000010360	CSTF2	cleavage stimulation factor subunit 2	46.414	0.0818121	0.106194	0.7709	0.440766	0.99969	0.253403	0.951345	54.0443	48.5633	38.8976	44.1508
ENSCSAG00000004308	SPP1	secreted phosphoprotein 1	114.649	0.0818014	0.118029	0.693061	0.488272	0.99969	0.304514	0.959178	130.342	114.471	96.6883	117.096
ENSCSAG00000016196	NVL	nuclear VCP like	75.5198	0.0817857	0.114034	0.716732	0.473539	0.99969	0.288294	0.95698	77.3575	85.8529	61.1248	77.7438
ENSCSAG00000008802	EXOSC4	exosome component 4	100.259	0.0817766	0.11432	0.716742	0.473533	0.99969	0.288288	0.956979	120.805	95.3921	116.693	68.1458
ENSCSAG00000015135	TIA1	TIA1 cytotoxic granule associated RNA binding protein	245.35	0.0817575	0.118411	0.690286	0.490015	0.99969	0.306455	0.959426	251.147	264.496	220.049	245.709
ENSCSAG00000011831	RSBN1L		101.043	0.0817486	0.116356	0.702507	0.482363	0.99969	0.29797	0.958319	92.1932	124.01	104.468	83.5026
ENSCSAG00000000824	PRDM2	PR/SET domain 2	59.5908	0.0817239	0.110396	0.74023	0.459161	0.99969	0.272779	0.954644	67.8203	62.4385	46.6771	61.4272
ENSCSAG00000016867	BCLAF1		204.034	0.0816746	0.119233	0.684512	0.493652	0.99969	0.310518	0.959935	182.267	248.887	176.706	208.277
ENSCSAG00000011505	SF3B1	splicing factor 3b subunit 1	411.809	0.0816589	0.11524	0.708578	0.478586	0.99969	0.293814	0.957754	432.354	428.397	390.087	396.398
ENSCSAG00000018422		neuropeptide Y receptor Y4-2	7.41489	0.081649	0.0572608	1.46315	0.143427	0.99969	0.0301802	0.699584	9.53723	12.1408	2.22272	5.7588
ENSCSAG00000018893		zinc finger CCCH-type containing 10	15.5599	0.0815503	0.077818	1.05609	0.290927	0.99969	0.117666	0.900786	20.1342	18.2112	13.3363	10.5578
ENSCSAG00000009376	SLC35B4	solute carrier family 35 member B4	47.5136	0.0815434	0.106912	0.762969	0.445482	0.99969	0.258319	0.952226	50.8652	53.7665	42.2317	43.191
ENSCSAG00000009973	ATP6V1F	ATPase H+ transporting V1 subunit F	93.1611	0.0815193	0.116592	0.699753	0.484082	0.99969	0.299868	0.958572	105.969	93.6577	93.3542	79.6634
ENSCSAG00000012168	ZNF483	zinc finger protein 483	11.0846	0.0815122	0.0664969	1.24958	0.211452	0.99969	0.0641242	0.831872	13.776	15.6096	11.1136	3.8392
ENSCSAG00000010157	PTPN6	protein tyrosine phosphatase non-receptor type 6	56.6509	0.0815117	0.110123	0.740671	0.458893	0.99969	0.272494	0.954599	65.7009	58.1025	50.0112	52.789
ENSCSAG00000008290	ATAD2B	ATPase family AAA domain containing 2B	223.124	0.0814601	0.11895	0.684545	0.493631	0.99969	0.310495	0.959933	223.595	246.285	192.265	230.352
ENSCSAG00000012326	RAB8B	RAB8B, member RAS oncogene family	120.722	0.08143	0.118549	0.686915	0.492136	0.99969	0.308822	0.959724	122.924	133.549	118.915	107.498
ENSCSAG00000009577	CHRAC1	chromatin accessibility complex subunit 1	127.384	0.0813538	0.116883	0.695166	0.486951	0.99969	0.303048	0.958988	111.268	161.299	97.7996	139.171
ENSCSAG00000015160	LAMB2	laminin subunit beta 2	121.879	0.081334	0.118138	0.689095	0.490764	0.99969	0.30729	0.959532	146.238	113.603	121.138	106.538
ENSCSAG00000001265	TTC39A	tetratricopeptide repeat domain 39A	62.0378	0.0812555	0.111715	0.727392	0.466986	0.99969	0.281184	0.95594	63.5815	71.1105	57.7907	55.6684
ENSCSAG00000018035	FIS1	fission, mitochondrial 1	118.166	0.0812318	0.1168	0.696329	0.486223	0.99969	0.302239	0.958883	130.342	122.275	135.586	84.4624
ENSCSAG00000001120	SF3A3		170.765	0.081191	0.11918	0.681357	0.495646	0.99969	0.312753	0.96021	167.431	193.386	181.152	141.091
ENSCSAG00000014225	GLE1	GLE1 RNA export mediator	78.7866	0.081181	0.11497	0.705938	0.480227	0.99969	0.295617	0.958001	84.7754	84.9857	66.6816	78.7036
ENSCSAG00000008236	ATAT1	alpha tubulin acetyltransferase 1	16.7043	0.0811459	0.0783719	1.04078	0.29798	0.99969	0.123084	0.904737	14.8357	26.016	14.4477	11.5176
ENSCSAG00000007661	TM7SF3	transmembrane 7 superfamily member 3	315.826	0.0811036	0.117121	0.692361	0.488711	0.99969	0.305003	0.959241	324.266	337.341	287.842	313.855
ENSCSAG00000018020	PRUNE1	prune exopolyphosphatase 1	22.321	0.0810118	0.0866392	0.940267	0.347081	0.99969	0.163605	0.926599	26.4923	26.016	23.3386	13.4372
ENSCSAG00000015843	BAZ2B	bromodomain adjacent to zinc finger domain 2B	227.622	0.081006	0.119003	0.68037	0.49627	0.99969	0.313455	0.960296	217.237	261.895	200.045	231.312
ENSCSAG00000007848	ZNRD2	zinc ribbon domain containing 2	118.298	0.0808662	0.116029	0.698141	0.485089	0.99969	0.300983	0.958719	157.894	96.2593	121.138	97.8996
ENSCSAG00000013210	OPTN	optineurin	63.9965	0.0808291	0.111904	0.722748	0.469835	0.99969	0.284267	0.956397	66.7606	71.9777	64.4589	52.789
ENSCSAG00000017386	RWDD2A	RWD domain containing 2A	21.8766	0.0807269	0.082808	0.976834	0.328651	0.99969	0.147834	0.9194	27.552	25.1488	8.89088	25.9146
ENSCSAG00000017973	FLT3	fms related receptor tyrosine kinase 3	33.4287	0.0807047	0.0976532	0.827006	0.408234	0.99969	0.220482	0.944483	40.2683	35.5553	23.3386	34.5528
ENSCSAG00000016392		PDZ and LIM domain 2	90.4531	0.080659	0.116549	0.692386	0.488695	0.99969	0.304985	0.959238	102.79	91.0561	84.4633	83.5026
ENSCSAG00000003973		enoyl-CoA hydratase 1	84.1084	0.0805668	0.115697	0.696813	0.48592	0.99969	0.301903	0.958839	97.4917	83.2513	78.9065	76.784
ENSCSAG00000014837	CDKN3	cyclin dependent kinase inhibitor 3	73.1831	0.0805665	0.112062	0.71833	0.472554	0.99969	0.287221	0.956826	78.4172	80.6497	51.1225	82.5428
ENSCSAG00000001941	ATP8B2		272.61	0.080565	0.118321	0.681136	0.495786	0.99969	0.31291	0.96023	299.893	272.301	281.174	237.071
ENSCSAG00000011036	SETMAR	SET domain and mariner transposase fusion gene	48.7906	0.0805546	0.106514	0.755978	0.449662	0.99969	0.262707	0.952987	52.9846	54.6337	36.6749	50.8694
ENSCSAG00000001414	SAMD13	sterile alpha motif domain containing 13	5.81761	0.0805142	0.0521718	1.61391	0.106547	0.99969	0.0167989	0.5645	8.47754	9.53921	3.33408	1.9196
ENSCSAG00000003402	XRCC1	X-ray repair cross complementing 1	72.562	0.0804839	0.113419	0.709953	0.477733	0.99969	0.292878	0.957625	86.8948	70.2433	61.1248	71.985
ENSCSAG00000009521			73.6694	0.0804734	0.111898	0.718241	0.472608	0.99969	0.28728	0.956835	62.5218	97.1265	61.1248	73.9046
ENSCSAG00000001641	ZNF547		21.7325	0.0804172	0.0871541	0.924532	0.35521	0.99969	0.170769	0.929462	23.3132	27.7504	16.6704	19.196
ENSCSAG00000014835	EDIL3	EGF like repeats and discoidin domains 3	73.2002	0.0804086	0.110603	0.726202	0.467715	0.99969	0.281971	0.956058	77.3575	82.3841	46.6771	86.382
ENSCSAG00000018614	TRIM13	tripartite motif containing 13	35.5969	0.0803434	0.0979137	0.819688	0.412394	0.99969	0.224593	0.945444	31.7908	48.5633	25.5613	36.4724
ENSCSAG00000011870	CACNA1H	calcium voltage-gated channel subunit alpha1 H	167.258	0.0803223	0.119241	0.673873	0.500392	0.99969	0.318098	0.960853	182.267	170.839	170.038	145.89
ENSCSAG00000007284	UBE2D1	ubiquitin conjugating enzyme E2 D1	139.221	0.0802328	0.1183	0.677575	0.498041	0.99969	0.315447	0.960537	131.402	164.768	110.025	150.689
ENSCSAG00000015440	FLVCR1	FLVCR heme transporter 1	72.1994	0.080217	0.113018	0.709333	0.478118	0.99969	0.2933	0.957683	65.7009	90.1889	66.6816	66.2262
ENSCSAG00000011123	PIK3CB	phosphatidylinositol-4,5-bisphosphate 3-kinase catalytic subunit beta	369.505	0.0802033	0.116662	0.687348	0.491864	0.99969	0.308518	0.959686	380.429	392.842	325.628	379.121
ENSCSAG00000007447	TFAP2A		130.548	0.0801815	0.115503	0.693227	0.488167	0.99969	0.304398	0.959163	111.268	169.104	91.1315	150.689
ENSCSAG00000012726	CENPQ	centromere protein Q	19.8229	0.0801575	0.0844967	0.953681	0.340245	0.99969	0.157678	0.92405	25.4326	21.68	17.7818	14.397
ENSCSAG00000005661			18.1922	0.0801447	0.0797079	1.01494	0.310135	0.99969	0.132664	0.911004	23.3132	20.8128	20.0045	8.6382
ENSCSAG00000002133	LRRC4B		66.6867	0.0801298	0.111359	0.720938	0.470948	0.99969	0.285474	0.956573	81.5963	63.3057	70.0157	51.8292
ENSCSAG00000013625	VWA5B2		13.7629	0.0801093	0.074593	1.08243	0.279059	0.99969	0.108785	0.893549	18.0148	16.4768	10.0022	10.5578
ENSCSAG00000003018	ELMOD1	ELMO domain containing 1	20.0766	0.0801078	0.0831684	0.964474	0.334808	0.99969	0.153029	0.921923	21.1938	26.8832	11.1136	21.1156
ENSCSAG00000012695	IK	IK cytokine	222.739	0.0801051	0.118991	0.673411	0.500686	0.99969	0.31843	0.960892	234.192	234.144	234.497	188.121
ENSCSAG00000010837	DCAF10	DDB1 and CUL4 associated factor 10	62.0521	0.0801047	0.10833	0.738412	0.460264	0.99969	0.273959	0.95483	49.8055	85.8529	51.1225	61.4272
ENSCSAG00000006453	NPTXR		67.3714	0.0800991	0.110375	0.724674	0.468652	0.99969	0.282985	0.956208	63.5815	83.2513	47.7885	74.8644
ENSCSAG00000002514	NLRX1	NLR family member X1	108.366	0.0800925	0.11766	0.680993	0.495876	0.99969	0.313012	0.960242	115.506	115.338	113.359	89.2614
ENSCSAG00000000729	C1orf174	chromosome unknown C1orf174 homolog	23.838	0.0800016	0.0897077	0.893665	0.371501	0.99969	0.185501	0.934698	28.6117	26.8832	17.7818	22.0754
ENSCSAG00000011751		transmembrane protein 256	173.458	0.0799245	0.118225	0.676854	0.498498	0.99969	0.315962	0.960599	201.342	167.37	202.267	122.854
ENSCSAG00000004907	COQ9	coenzyme Q9	110.56	0.0798861	0.118075	0.676874	0.498486	0.99969	0.315948	0.960597	120.805	114.471	110.025	96.9398
ENSCSAG00000001755		G protein-coupled receptor 89A	49.1745	0.0798669	0.104983	0.760889	0.446723	0.99969	0.259619	0.952454	42.3877	65.9073	50.0112	38.392
ENSCSAG00000006785	USF3	upstream transcription factor family member 3	27.0913	0.0798594	0.0933964	0.856651	0.391638	0.99969	0.204381	0.94037	31.7908	30.352	22.2272	23.995
ENSCSAG00000003565	PGRMC2	progesterone receptor membrane component 2	147.121	0.0798042	0.118779	0.671352	0.501996	0.99969	0.319912	0.961066	143.058	169.104	118.915	157.407
ENSCSAG00000000665	KLHL17		9.16708	0.0797615	0.0627312	1.30052	0.193425	0.99969	0.054008	0.806475	13.776	11.2736	7.77952	3.8392
ENSCSAG00000003181	POLR1G	RNA polymerase I subunit G	24.1944	0.0797442	0.0845626	0.951593	0.341303	0.99969	0.15859	0.924454	33.9101	23.4144	28.8953	10.5578
ENSCSAG00000005765			316.198	0.0796769	0.117707	0.676684	0.498606	0.99969	0.316084	0.960613	304.132	358.154	286.731	315.774
ENSCSAG00000012058	PIGU	phosphatidylinositol glycan anchor biosynthesis class U	53.3262	0.0796708	0.107314	0.741679	0.458282	0.99969	0.271841	0.954495	46.6265	70.2433	45.5657	50.8694
ENSCSAG00000003197	NPY1R	neuropeptide Y receptor Y1	7.9922	0.0795741	0.0576945	1.41147	0.158108	0.99969	0.0365146	0.738048	7.41785	15.6096	2.22272	6.7186
ENSCSAG00000012610	DNAH12		11.0524	0.0795122	0.0683311	1.17744	0.23902	0.99969	0.0810837	0.862192	15.8954	13.008	6.66816	8.6382
ENSCSAG00000012438	ARAP3		70.0283	0.0793163	0.112737	0.704577	0.481074	0.99969	0.296549	0.958127	84.7754	66.7745	70.0157	58.5478
ENSCSAG00000001586	CTTNBP2NL	CTTNBP2 N-terminal like	259.652	0.0792165	0.119225	0.66396	0.506716	0.99969	0.32527	0.961683	245.849	302.653	194.488	295.619
ENSCSAG00000013434	TAF3	TATA-box binding protein associated factor 3	44.4931	0.0791973	0.104618	0.757029	0.449032	0.99969	0.262044	0.952873	50.8652	47.6961	33.3408	46.0704
ENSCSAG00000017876	GPC2	glypican 2	12.7911	0.0791356	0.0722384	1.10694	0.268321	0.99969	0.10101	0.886286	15.8954	16.4768	11.1136	7.6784
ENSCSAG00000012941	MMP16	matrix metallopeptidase 16	22.8045	0.0791355	0.0875863	0.904481	0.36574	0.99969	0.180235	0.932918	21.1938	32.0864	17.7818	20.1558
ENSCSAG00000006404	CYB561A3	cytochrome b ascorbate-dependent protein 3	35.0506	0.0791245	0.0997999	0.793113	0.427712	0.99969	0.239981	0.948763	36.0295	42.4929	30.0067	31.6734
ENSCSAG00000014370	SYS1	SYS1 golgi trafficking protein	47.6652	0.0791005	0.106712	0.741917	0.458138	0.99969	0.271688	0.95447	50.8652	53.7665	46.6771	39.3518
ENSCSAG00000015945	TRIM23	tripartite motif containing 23	36.749	0.0790523	0.0995643	0.795434	0.426361	0.99969	0.238609	0.948483	37.0892	45.0945	38.8976	25.9146
ENSCSAG00000009844	LANCL1	LanC like 1	41.8687	0.0790481	0.103136	0.766734	0.44324	0.99969	0.255977	0.95181	49.8055	43.3601	31.1181	43.191
ENSCSAG00000014163	TAB3	TGF-beta activated kinase 1 (MAP3K7) binding protein 3	36.991	0.0790029	0.0995285	0.793106	0.427716	0.99969	0.239985	0.948764	37.0892	45.9617	25.5613	39.3518
ENSCSAG00000005210	RFXANK	regulatory factor X associated ankyrin containing protein	35.0003	0.0789926	0.0961839	0.825274	0.409216	0.99969	0.22145	0.944712	50.8652	28.6176	35.5635	24.9548
ENSCSAG00000001597	ZNF584		59.8901	0.0789801	0.110413	0.71613	0.473911	0.99969	0.288699	0.957038	74.1785	56.3681	53.3453	55.6684
ENSCSAG00000018788	RBM15B	RNA binding motif protein 15B	189.446	0.0789781	0.119146	0.663427	0.507057	0.99969	0.325658	0.961727	235.252	165.635	188.931	167.965
ENSCSAG00000006605		F-box and WD repeat domain containing 9	14.1818	0.0789631	0.0751376	1.05737	0.290342	0.99969	0.117221	0.900447	18.0148	17.344	8.89088	12.4774
ENSCSAG00000011910	PHF23	PHD finger protein 23	154.657	0.0788596	0.118694	0.665088	0.505994	0.99969	0.324448	0.96159	182.267	145.69	167.815	122.854
ENSCSAG00000010167	GALT	galactose-1-phosphate uridylyltransferase	37.1995	0.0788125	0.0985127	0.803025	0.421961	0.99969	0.234157	0.947555	44.5071	39.0241	42.2317	23.0352
ENSCSAG00000002342			11.0422	0.078809	0.0685737	1.16297	0.244841	0.99969	0.0848891	0.867551	14.8357	13.8752	7.77952	7.6784
ENSCSAG00000011415	SYNPO		533.491	0.0787893	0.114493	0.688114	0.491381	0.99969	0.307979	0.959619	570.114	542.868	476.773	544.207
ENSCSAG00000010797	ATRX	ATRX chromatin remodeler	474.34	0.078783	0.117647	0.669424	0.503225	0.99969	0.321304	0.961228	460.966	532.462	385.642	518.292
ENSCSAG00000017500	CEP76	centrosomal protein 76	91.7748	0.0787756	0.115596	0.681669	0.495448	0.99969	0.312532	0.960183	87.9544	108.4	97.7996	72.9448
ENSCSAG00000012593	DPY19L4		360.517	0.0787707	0.116308	0.677334	0.498194	0.99969	0.315619	0.960557	384.668	368.561	356.746	332.091
ENSCSAG00000016052	HOMEZ		36.1678	0.0787245	0.0994821	0.793812	0.427305	0.99969	0.239567	0.948679	45.5668	35.5553	36.6749	26.8744
ENSCSAG00000011810	PROCR		45.1827	0.0787011	0.103535	0.762323	0.445867	0.99969	0.258722	0.952297	54.0443	45.9617	50.0112	30.7136
ENSCSAG00000001387	TYW3	tRNA-yW synthesizing protein 3 homolog	68.052	0.0786934	0.113053	0.695828	0.486537	0.99969	0.302587	0.958929	68.88	78.0481	60.0134	65.2664
ENSCSAG00000018219	RTTN	rotatin	73.1562	0.0786881	0.112573	0.698157	0.485079	0.99969	0.300972	0.958717	68.88	89.3217	56.6793	77.7438
ENSCSAG00000004146	CYB5B	cytochrome b5 type B	211.653	0.078649	0.118994	0.661176	0.508499	0.99969	0.327302	0.961912	240.55	204.659	205.602	195.799
ENSCSAG00000008431	UBN2	ubinuclein 2	38.2145	0.0786484	0.100704	0.780466	0.435116	0.99969	0.24756	0.950253	34.9698	50.2977	31.1181	36.4724
ENSCSAG00000008021	ALDH1L1	aldehyde dehydrogenase 1 family member L1	56.2874	0.0785973	0.109872	0.716147	0.4739	0.99969	0.288688	0.957036	63.5815	58.9697	55.568	47.0302
ENSCSAG00000013739	LRSAM1	leucine rich repeat and sterile alpha motif containing 1	29.8158	0.078561	0.0951734	0.82608	0.408759	0.99969	0.220999	0.944606	28.6117	39.0241	26.6726	24.9548
ENSCSAG00000015221	TENT2	terminal nucleotidyltransferase 2	238.889	0.0785008	0.118921	0.659784	0.509392	0.99969	0.328321	0.962026	227.834	274.036	208.936	244.749
ENSCSAG00000001318			52.123	0.0784632	0.108662	0.72246	0.470012	0.99969	0.284458	0.956425	59.3428	54.6337	45.5657	48.9498
ENSCSAG00000011919	DVL2	dishevelled segment polarity protein 2	130.322	0.0784371	0.117249	0.669974	0.502874	0.99969	0.320906	0.961182	160.014	117.939	144.477	98.8594
ENSCSAG00000011939	ANGEL1	angel homolog 1	95.9522	0.0784302	0.117161	0.669544	0.503148	0.99969	0.321217	0.961218	105.969	98.8609	87.7974	91.181
ENSCSAG00000001284	SCP2	sterol carrier protein 2	292.467	0.0783834	0.117965	0.664243	0.506535	0.99969	0.325063	0.961659	282.938	329.536	265.615	291.779
ENSCSAG00000003773	TENM4		80.5198	0.0782843	0.114964	0.681185	0.495755	0.99969	0.312876	0.960225	81.5963	91.0561	82.2406	67.186
ENSCSAG00000018217			9.44158	0.0782431	0.0641079	1.23944	0.215183	0.99969	0.0663155	0.83652	10.5969	14.7424	6.66816	5.7588
ENSCSAG00000016130	SETD2	SET domain containing 2, histone lysine methyltransferase	285.083	0.0782125	0.119104	0.656283	0.511642	0.99969	0.330894	0.96231	270.222	329.536	226.717	313.855
ENSCSAG00000016078	MCM9	minichromosome maintenance 9 homologous recombination repair factor	29.2828	0.0782106	0.0947932	0.827233	0.408105	0.99969	0.220355	0.944453	38.1489	28.6176	24.4499	25.9146
ENSCSAG00000015301	MIS18BP1		162.131	0.0781981	0.119242	0.655718	0.512005	0.99969	0.331311	0.962355	167.431	174.307	152.256	154.528
ENSCSAG00000010826	CEP63		81.7856	0.0781914	0.114955	0.679658	0.496721	0.99969	0.313961	0.960357	78.4172	97.1265	70.0157	81.583
ENSCSAG00000016974	NR2F2	nuclear receptor subfamily 2 group F member 2	149.208	0.0781834	0.118614	0.658569	0.510173	0.99969	0.329213	0.962125	131.402	184.714	130.029	150.689
ENSCSAG00000012966	TMEM268	transmembrane protein 268	42.148	0.0781581	0.104181	0.750808	0.452768	0.99969	0.265985	0.953539	44.5071	48.5633	40.0089	35.5126
ENSCSAG00000009283	SLC35F6	solute carrier family 35 member F6	71.71	0.0781462	0.113895	0.686059	0.492676	0.99969	0.309426	0.9598	77.3575	77.1809	62.2361	70.0654
ENSCSAG00000003250	CTSO	cathepsin O	52.0375	0.0780677	0.10774	0.724062	0.469028	0.99969	0.283392	0.956268	48.7458	65.0401	44.4544	49.9096
ENSCSAG00000010491			31.3968	0.0780631	0.0912125	0.861271	0.389089	0.99969	0.201951	0.939696	50.8652	21.68	30.0067	23.0352
ENSCSAG00000013571	MSH2	mutS homolog 2	207.132	0.0780484	0.118909	0.656268	0.511652	0.99969	0.330906	0.962311	207.7	227.207	197.822	195.799
ENSCSAG00000006141	TAOK2	TAO kinase 2	123.456	0.0780134	0.117705	0.663541	0.506984	0.99969	0.325575	0.961717	154.715	108.4	122.25	108.457
ENSCSAG00000015561		protein only RNase P catalytic subunit	104.849	0.0779318	0.117778	0.661479	0.508305	0.99969	0.327081	0.961887	105.969	117.072	95.5769	100.779
ENSCSAG00000016157	TP53BP2	tumor protein p53 binding protein 2	196.528	0.0779107	0.119146	0.653711	0.513298	0.99969	0.332793	0.962517	205.58	208.128	168.927	203.478
ENSCSAG00000001353	LEPROT	leptin receptor overlapping transcript	1705.27	0.0779078	0.113357	0.687211	0.49195	0.99969	0.308614	0.959698	1637.22	1913.91	1449.21	1820.74
ENSCSAG00000009518	PHC1	polyhomeotic homolog 1	114.395	0.0779066	0.118358	0.658105	0.51047	0.99969	0.329554	0.962162	119.745	123.143	103.356	111.337
ENSCSAG00000003440	LIPE	lipase E, hormone sensitive type	38.0429	0.0778917	0.101375	0.770099	0.441241	0.99969	0.253896	0.951435	46.6265	38.1569	36.6749	30.7136
ENSCSAG00000003014	STOX2	storkhead box 2	30.1117	0.0777424	0.0950629	0.819842	0.412306	0.99969	0.224506	0.945424	31.7908	36.4225	31.1181	21.1156
ENSCSAG00000001602	RHOC	ras homolog family member C	187.649	0.0777325	0.119215	0.652339	0.514182	0.99969	0.333809	0.962626	207.7	187.315	193.377	162.206
ENSCSAG00000013847	NCOA2	nuclear receptor coactivator 2	116.768	0.0777306	0.118259	0.657096	0.511119	0.99969	0.330296	0.962244	125.044	123.143	98.911	119.975
ENSCSAG00000007637	PIN1	peptidylprolyl cis/trans isomerase, NIMA-interacting 1	108.187	0.0777071	0.116887	0.665681	0.505615	0.99969	0.324017	0.96154	130.342	100.595	114.47	87.3418
ENSCSAG00000005842	PI4K2A	phosphatidylinositol 4-kinase type 2 alpha	54.9531	0.0776213	0.108304	0.715993	0.473996	0.99969	0.288792	0.957051	55.104	65.0401	41.1203	58.5478
ENSCSAG00000011053	SFT2D2	SFT2 domain containing 2	22.7282	0.0775851	0.0874052	0.890316	0.373296	0.99969	0.187154	0.935237	30.7311	22.5472	15.559	22.0754
ENSCSAG00000017970	HAUS1	HAUS augmin like complex subunit 1	42.6388	0.0775394	0.104356	0.744068	0.456835	0.99969	0.2703	0.954247	50.8652	43.3601	38.8976	37.4322
ENSCSAG00000006539	GCDH	glutaryl-CoA dehydrogenase	72.4019	0.0775025	0.113773	0.681762	0.495389	0.99969	0.312466	0.960175	79.4769	76.3137	73.3497	60.4674
ENSCSAG00000012809	PGAP6	post-glycosylphosphatidylinositol attachment to proteins 6	124.583	0.0774667	0.118575	0.653658	0.513332	0.99969	0.332833	0.962521	135.641	128.346	127.806	106.538
ENSCSAG00000010351	PIANP	PILR alpha associated neural protein	14.6488	0.0774321	0.0752267	1.03474	0.300792	0.99969	0.125274	0.906246	19.0745	17.344	7.77952	14.397
ENSCSAG00000005077	ZDHHC13		69.6186	0.0772614	0.113045	0.683062	0.494568	0.99969	0.311544	0.960062	66.7606	83.2513	62.2361	66.2262
ENSCSAG00000012838	MRPL28	mitochondrial ribosomal protein L28	92.6494	0.0771954	0.116118	0.665542	0.505704	0.99969	0.324118	0.961552	107.029	91.0561	96.6883	75.8242
ENSCSAG00000005090	DCLRE1A	DNA cross-link repair 1A	52.0646	0.0771932	0.108757	0.71006	0.477667	0.99969	0.292806	0.957615	57.2234	56.3681	46.6771	47.99
ENSCSAG00000005709	CUTC	cutC copper transporter	36.5409	0.0771845	0.100756	0.766841	0.443176	0.99969	0.255911	0.951798	43.4474	38.1569	30.0067	34.5528
ENSCSAG00000012431	THUMPD2		53.4287	0.0771363	0.108692	0.710633	0.477312	0.99969	0.292416	0.957561	64.6412	52.0321	50.0112	47.0302
ENSCSAG00000005534	HSD17B12	hydroxysteroid 17-beta dehydrogenase 12	251.957	0.077079	0.118851	0.648253	0.516821	0.99969	0.336845	0.962951	253.266	275.77	210.047	268.744
ENSCSAG00000001010	MED18	mediator complex subunit 18	33.5457	0.0770783	0.098138	0.787229	0.431148	0.99969	0.243487	0.949463	43.4474	32.0864	28.8953	29.7538
ENSCSAG00000005052	UEVLD	UEV and lactate/malate dehyrogenase domains	167.207	0.0769595	0.119024	0.646062	0.518239	0.99969	0.338481	0.963123	154.715	198.589	138.92	176.603
ENSCSAG00000018793			8.52423	0.0769322	0.0597585	1.32012	0.186796	0.99969	0.0504872	0.795736	16.9551	6.93761	4.44544	5.7588
ENSCSAG00000005301	RBL2	RB transcriptional corepressor like 2	186.476	0.0769289	0.119114	0.645881	0.518357	0.99969	0.338617	0.963138	194.983	196.855	182.263	171.804
ENSCSAG00000015122	NIN		389.699	0.0768812	0.116255	0.661238	0.50846	0.99969	0.327257	0.961907	412.22	401.514	346.744	398.317
ENSCSAG00000010674	CCNF		77.5343	0.0768791	0.114002	0.675304	0.499482	0.99969	0.317071	0.960731	92.1932	74.5793	80.0179	63.3468
ENSCSAG00000003414	SLC10A7		18.3485	0.076868	0.0825282	0.934269	0.350165	0.99969	0.166309	0.927706	21.1938	22.5472	13.3363	16.3166
ENSCSAG00000007058	RNF144A	ring finger protein 144A	110.485	0.0768629	0.117861	0.652162	0.514297	0.99969	0.33394	0.962641	125.044	110.135	94.4656	112.297
ENSCSAG00000004263	ZNF821	zinc finger protein 821	34.1784	0.0768343	0.099063	0.777203	0.437039	0.99969	0.249542	0.950629	39.2086	37.2897	33.3408	26.8744
ENSCSAG00000007570	DNAJC17	DnaJ heat shock protein family (Hsp40) member C17	18.7547	0.07683	0.08223	0.939721	0.347361	0.99969	0.16385	0.926701	21.1938	23.4144	18.8931	11.5176
ENSCSAG00000017265	FBXL7		92.9603	0.0768216	0.116068	0.661298	0.508421	0.99969	0.327213	0.961902	85.8351	112.736	81.1293	92.1408
ENSCSAG00000009794	TMEM50B	transmembrane protein 50B	114.871	0.0767683	0.117091	0.655336	0.512251	0.99969	0.331593	0.962386	128.223	117.072	85.5747	128.613
ENSCSAG00000017308			200.379	0.0767619	0.119242	0.643334	0.520008	0.99969	0.340525	0.963337	194.983	227.207	163.37	215.955
ENSCSAG00000017082		transmembrane protein 182	21.4881	0.0767307	0.0864165	0.889253	0.373867	0.99969	0.187682	0.935407	24.3729	26.016	14.4477	21.1156
ENSCSAG00000019058	OTUD1	OTU deubiquitinase 1	15.171	0.076659	0.0773156	0.996636	0.318941	0.99969	0.139793	0.915157	18.0148	19.0784	11.1136	12.4774
ENSCSAG00000010453	OGDHL	oxoglutarate dehydrogenase L	221.421	0.0766517	0.118695	0.645862	0.518369	0.99969	0.338631	0.963139	241.61	222.871	210.047	211.156
ENSCSAG00000015748	DOK1	docking protein 1	26.4658	0.0766444	0.0925936	0.829797	0.406654	0.99969	0.218929	0.944111	32.8505	27.7504	22.2272	23.0352
ENSCSAG00000012629	DUSP19	dual specificity phosphatase 19	116.353	0.0766342	0.118339	0.64756	0.51727	0.99969	0.337362	0.963006	128.223	118.807	102.245	116.136
ENSCSAG00000007022	ZNF169		19.4064	0.0766121	0.0837746	0.917306	0.358982	0.99969	0.174137	0.930731	24.3729	21.68	13.3363	18.2362
ENSCSAG00000018185	NANP		47.2346	0.0765984	0.106609	0.71906	0.472104	0.99969	0.286731	0.956756	55.104	48.5633	41.1203	44.1508
ENSCSAG00000001903	PRPF31	pre-mRNA processing factor 31	326.942	0.0765689	0.11832	0.647427	0.517356	0.99969	0.337462	0.963016	386.788	298.317	328.962	293.699
ENSCSAG00000006618	DIS3L2	DIS3 like 3'-5' exoribonuclease 2	54.3204	0.0765369	0.107106	0.714019	0.475215	0.99969	0.290123	0.957239	59.3428	59.8369	36.6749	61.4272
ENSCSAG00000013640		S-phase kinase associated protein 1	383.043	0.0765231	0.11601	0.659553	0.509541	0.99969	0.328491	0.962044	399.504	399.78	348.967	383.92
ENSCSAG00000013981	PITRM1		667.444	0.0764821	0.113348	0.674656	0.499894	0.99969	0.317536	0.960786	650.651	737.988	617.916	663.222
ENSCSAG00000016767	CKAP2L	cytoskeleton associated protein 2 like	104.786	0.0764667	0.115947	0.658686	0.510097	0.99969	0.329127	0.962115	97.4917	126.611	78.9065	116.136
ENSCSAG00000016628	ZGPAT		73.1941	0.0764367	0.11302	0.677061	0.498368	0.99969	0.315815	0.960581	92.1932	65.9073	65.5702	69.1056
ENSCSAG00000010371	SLC25A29	solute carrier family 25 member 29	54.8326	0.0764359	0.107197	0.714258	0.475068	0.99969	0.289962	0.957217	57.2234	62.4385	62.2361	37.4322
ENSCSAG00000009580	CTDSPL2	CTD small phosphatase like 2	118.729	0.0762821	0.118311	0.644554	0.519216	0.99969	0.33961	0.963241	127.163	124.877	100.022	122.854
ENSCSAG00000009482	IQSEC1		237.285	0.0762186	0.118603	0.642798	0.520355	0.99969	0.340927	0.963378	265.983	231.543	228.94	222.674
ENSCSAG00000002294	CHEK1	checkpoint kinase 1	65.5991	0.0761769	0.112084	0.680321	0.496301	0.99969	0.31349	0.9603	79.4769	62.4385	60.0134	60.4674
ENSCSAG00000006509	INSIG1	insulin induced gene 1	55.7746	0.0761295	0.110046	0.692035	0.488915	0.99969	0.30523	0.95927	60.4025	60.7041	51.1225	50.8694
ENSCSAG00000015946		coiled-coil domain containing 183	12.0796	0.0760867	0.0708376	1.08556	0.277673	0.99969	0.107767	0.892651	15.8954	14.7424	10.0022	7.6784
ENSCSAG00000002330	RNFT2		15.7138	0.0760831	0.0783532	0.976154	0.328988	0.99969	0.148117	0.919541	19.0745	19.0784	12.225	12.4774
ENSCSAG00000005169	SMNDC1	survival motor neuron domain containing 1	23.6796	0.0760811	0.0888583	0.858249	0.390755	0.99969	0.203539	0.940138	30.7311	24.2816	16.6704	23.0352
ENSCSAG00000017859		desmoglein 2	208.681	0.0760742	0.118982	0.639257	0.522656	0.99969	0.343594	0.963652	221.476	216.8	183.374	213.076
ENSCSAG00000014230	SKAP2		38.9347	0.0760707	0.0991618	0.766367	0.443458	0.99969	0.256205	0.951851	41.328	45.9617	23.3386	45.1106
ENSCSAG00000000420	UTP3	UTP3 small subunit processome component	51.2624	0.0760154	0.10693	0.71228	0.476292	0.99969	0.2913	0.957405	58.2831	53.7665	55.568	37.4322
ENSCSAG00000016270	ZBTB49	zinc finger and BTB domain containing 49	49.7249	0.0760065	0.10772	0.70564	0.480412	0.99969	0.295821	0.958029	54.0443	54.6337	42.2317	47.99
ENSCSAG00000009651	RIMKLB	ribosomal modification protein rimK like family member B	232.081	0.0759954	0.118765	0.639657	0.522396	0.99969	0.343292	0.963621	223.595	262.762	214.492	227.473
ENSCSAG00000013699	SRC		171.004	0.0759832	0.119229	0.637436	0.523841	0.99969	0.34497	0.963792	185.446	174.307	167.815	156.447
ENSCSAG00000017276	CASP8AP2	caspase 8 associated protein 2	88.4951	0.0759571	0.116314	0.653008	0.513751	0.99969	0.333313	0.962573	89.0141	99.7281	85.5747	79.6634
ENSCSAG00000002254	COQ5	coenzyme Q5, methyltransferase	130.097	0.0758446	0.118653	0.639482	0.522509	0.99969	0.343424	0.963635	152.596	123.143	118.915	125.734
ENSCSAG00000000988	SLC9A1	solute carrier family 9 member A1	29.3955	0.0757684	0.0944224	0.802758	0.422115	0.99969	0.234313	0.947588	33.9101	32.9536	20.0045	30.7136
ENSCSAG00000016229	NKX3-1	NK3 homeobox 1	19.2455	0.0757664	0.0826914	0.922482	0.356277	0.99969	0.171719	0.929824	27.552	18.2112	17.7818	13.4372
ENSCSAG00000011522	PEX6	peroxisomal biogenesis factor 6	41.6164	0.0757436	0.102179	0.743297	0.457302	0.99969	0.270797	0.954327	48.7458	43.3601	45.5657	28.794
ENSCSAG00000000981	ZDHHC18		59.0004	0.0757412	0.108528	0.699258	0.484391	0.99969	0.30021	0.958617	79.4769	49.4305	53.3453	53.7488
ENSCSAG00000018042	TNFRSF19	TNF receptor superfamily member 19	672.947	0.0756662	0.115587	0.654471	0.512808	0.99969	0.332232	0.962456	641.114	761.403	579.018	710.252
ENSCSAG00000006351	SAG	S-antigen visual arrestin	6.25005	0.0756283	0.0530997	1.48197	0.13835	0.99969	0.0281206	0.684523	12.7163	6.07041	3.33408	2.8794
ENSCSAG00000012747	BET1	Bet1 golgi vesicular membrane trafficking protein	131.228	0.0756074	0.118934	0.635844	0.524878	0.99969	0.346176	0.963913	141.999	135.283	126.695	120.935
ENSCSAG00000011498	GXYLT2		19.7023	0.0756074	0.0836806	0.908964	0.363369	0.99969	0.178086	0.932163	27.552	19.0784	17.7818	14.397
ENSCSAG00000016798	PARP2	poly(ADP-ribose) polymerase 2	77.5305	0.075533	0.113267	0.667998	0.504135	0.99969	0.322335	0.961348	98.5514	68.5089	77.7952	65.2664
ENSCSAG00000014138	TRANK1		34.9641	0.0755171	0.0991908	0.762666	0.445663	0.99969	0.258508	0.95226	44.5071	33.8208	28.8953	32.6332
ENSCSAG00000011859	ABLIM3	actin binding LIM protein family member 3	44.2763	0.0755161	0.104486	0.722763	0.469825	0.99969	0.284256	0.956395	50.8652	46.8289	33.3408	46.0704
ENSCSAG00000012365	TMEM243	transmembrane protein 243	24.9114	0.0755113	0.0875636	0.864973	0.387054	0.99969	0.200019	0.939149	21.1938	36.4225	26.6726	15.3568
ENSCSAG00000014513	EXOG		12.5364	0.0754402	0.0720032	1.05718	0.290432	0.99969	0.117289	0.900499	15.8954	15.6096	10.0022	8.6382
ENSCSAG00000002583	SLC17A7	solute carrier family 17 member 7	24.3667	0.0754145	0.088619	0.854082	0.393059	0.99969	0.205742	0.940741	34.9698	21.68	17.7818	23.0352
ENSCSAG00000010553			63.5479	0.0754019	0.112152	0.672262	0.501417	0.99969	0.319257	0.960989	67.8203	69.3761	55.568	61.4272
ENSCSAG00000017751	TECPR1	tectonin beta-propeller repeat containing 1	45.6933	0.0753696	0.104646	0.72201	0.470288	0.99969	0.284758	0.956469	57.2234	43.3601	46.6771	35.5126
ENSCSAG00000003945	GFOD2	glucose-fructose oxidoreductase domain containing 2	76.1199	0.0753147	0.111503	0.677068	0.498363	0.99969	0.315809	0.96058	99.6111	65.0401	82.2406	57.588
ENSCSAG00000002790	TOP2A	DNA topoisomerase II alpha	1022.81	0.0752205	0.109736	0.685463	0.493052	0.99969	0.309846	0.959852	1076.65	1045.84	965.771	1002.99
ENSCSAG00000018098	APH1A	aph-1 homolog A, gamma-secretase subunit	439.145	0.0751704	0.115797	0.649286	0.516154	0.99969	0.336076	0.962869	478.981	436.202	447.878	393.518
ENSCSAG00000005577	CD82	CD82 molecule	40.0322	0.0751291	0.102023	0.736868	0.461203	0.99969	0.274963	0.954988	38.1489	50.2977	40.0089	31.6734
ENSCSAG00000017848	PROSER1	proline and serine rich 1	71.6312	0.0750899	0.113907	0.659106	0.509827	0.99969	0.328819	0.962081	73.1188	80.6497	65.5702	67.186
ENSCSAG00000012925	CWC22	CWC22 spliceosome associated protein homolog	298.694	0.0750893	0.119037	0.630453	0.528398	0.99969	0.350281	0.964321	286.117	340.81	236.72	331.131
ENSCSAG00000015645	PAEP		5.2403	0.0750623	0.0487933	1.63158	0.102768	0.99969	0.0156378	0.546819	10.5969	6.07041	3.33408	0.9598
ENSCSAG00000001993	ZNF616		10.8221	0.0750285	0.0671114	1.12763	0.259477	0.99969	0.0947944	0.879727	11.6566	16.4768	5.5568	9.598
ENSCSAG00000002130	SYT3	synaptotagmin 3	72.208	0.0750093	0.114045	0.657923	0.510587	0.99969	0.329687	0.962177	80.5366	74.5793	65.5702	68.1458
ENSCSAG00000004605	WTIP		133.887	0.0750058	0.118423	0.633892	0.526151	0.99969	0.347659	0.964062	164.252	119.674	127.806	123.814
ENSCSAG00000000768	SLC25A33	solute carrier family 25 member 33	52.3353	0.0749892	0.108415	0.691905	0.488997	0.99969	0.305321	0.959281	60.4025	53.7665	43.343	51.8292
ENSCSAG00000017995	PIAS2	protein inhibitor of activated STAT 2	81.25	0.074983	0.114626	0.653648	0.513339	0.99969	0.33284	0.962522	74.1785	99.7281	73.3497	77.7438
ENSCSAG00000004323	NUDT9	nudix hydrolase 9	42.3817	0.074956	0.1033	0.727376	0.466996	0.99969	0.281194	0.955942	51.9249	41.6257	43.343	32.6332
ENSCSAG00000016063	LANCL2	LanC like 2	107.948	0.0749527	0.117843	0.635803	0.524905	0.99969	0.346207	0.963917	104.91	124.01	101.134	101.739
ENSCSAG00000017960	EPG5	ectopic P-granules autophagy protein 5 homolog	55.6784	0.0749156	0.109965	0.681356	0.495646	0.99969	0.312754	0.960211	58.2831	62.4385	51.1225	50.8694
ENSCSAG00000013094	USP13	ubiquitin specific peptidase 13	88.3367	0.0749023	0.116412	0.643439	0.519939	0.99969	0.340446	0.963328	91.1335	97.1265	84.4633	80.6232
ENSCSAG00000018972	TSPYL1		48.8486	0.0748786	0.102516	0.733275	0.463391	0.99969	0.277311	0.955352	64.6412	43.3601	56.6793	30.7136
ENSCSAG00000005633	MSI2	musashi RNA binding protein 2	231.053	0.0747761	0.118545	0.630676	0.528253	0.99969	0.350111	0.964305	232.073	251.488	218.938	221.714
ENSCSAG00000013746	STXBP1	syntaxin binding protein 1	59.8418	0.0747749	0.110805	0.674516	0.499983	0.99969	0.317637	0.960798	58.2831	71.1105	53.3453	56.6282
ENSCSAG00000016610	TUBB4B	tubulin beta 4B class IVb	305.386	0.0747707	0.118404	0.631781	0.52753	0.99969	0.349266	0.964221	353.937	285.309	314.515	267.784
ENSCSAG00000019435			106.354	0.0747384	0.117695	0.635438	0.525143	0.99969	0.346484	0.963944	121.865	104.064	104.468	95.0202
ENSCSAG00000014268	LNPEP	leucyl and cystinyl aminopeptidase	619.433	0.0747292	0.113096	0.660685	0.508814	0.99969	0.327662	0.961952	618.86	668.612	577.907	612.353
ENSCSAG00000004094	ATG16L2		31.5437	0.0747279	0.0965478	0.776208	0.437626	0.99969	0.250149	0.950743	37.0892	33.8208	32.2294	23.0352
ENSCSAG00000004590	WDR59	WD repeat domain 59	69.6695	0.0746668	0.113379	0.658996	0.509898	0.99969	0.328899	0.96209	80.5366	69.3761	64.4589	64.3066
ENSCSAG00000014864	TP53RK	TP53 regulating kinase	87.8299	0.0746662	0.115355	0.647219	0.51749	0.99969	0.337617	0.963032	81.5963	105.799	90.0201	73.9046
ENSCSAG00000006672	NEPRO	nucleolus and neural progenitor protein	53.6589	0.0746584	0.109045	0.684763	0.493493	0.99969	0.31034	0.959914	54.0443	62.4385	51.1225	47.0302
ENSCSAG00000009342	PDCD6IP	programmed cell death 6 interacting protein	453.987	0.0746566	0.117679	0.634169	0.525971	0.99969	0.347448	0.964041	428.116	520.321	378.974	488.538
ENSCSAG00000016151	LYPD6B	LY6/PLAUR domain containing 6B	6.62079	0.0746391	0.0546576	1.40651	0.159572	0.99969	0.0371774	0.741511	11.6566	7.80481	2.22272	4.799
ENSCSAG00000009943	TSPAN33		15.3328	0.0746267	0.0770797	0.975519	0.329303	0.99969	0.14838	0.919673	19.0745	18.2112	14.4477	9.598
ENSCSAG00000005323	WNT7B	Wnt family member 7B	14.532	0.0744614	0.0755445	0.989808	0.322268	0.99969	0.142527	0.916649	14.8357	20.8128	10.0022	12.4774
ENSCSAG00000016997	ARFGEF3		113.491	0.074415	0.118265	0.629014	0.52934	0.99969	0.351382	0.964429	115.506	124.877	102.245	111.337
ENSCSAG00000012291	YLPM1		188.82	0.074379	0.119157	0.624004	0.532625	0.99969	0.355231	0.964801	191.804	204.659	167.815	191
ENSCSAG00000014101	SWI5		96.9709	0.0743639	0.114306	0.651829	0.514512	0.99969	0.334187	0.962667	129.282	78.9153	100.022	79.6634
ENSCSAG00000016125	WFS1	wolframin ER transmembrane glycoprotein	181.359	0.0743608	0.119219	0.623756	0.532788	0.99969	0.355422	0.964819	181.207	199.456	184.486	160.287
ENSCSAG00000004767	CCDC113	coiled-coil domain containing 113	39.6183	0.0743448	0.101322	0.734593	0.462587	0.99969	0.276448	0.955219	50.8652	37.2897	30.0067	40.3116
ENSCSAG00000002140	IGSF9B	immunoglobulin superfamily member 9B	20.3199	0.0743059	0.0847935	0.878056	0.379914	0.99969	0.1933	0.937167	24.3729	23.4144	13.3363	20.1558
ENSCSAG00000012427	MSRB2		42.254	0.0742222	0.102356	0.727047	0.467197	0.99969	0.281412	0.955974	57.2234	36.4225	38.8976	36.4724
ENSCSAG00000002983			31.7283	0.0742152	0.0972208	0.764912	0.444324	0.99969	0.257109	0.952012	39.2086	32.0864	27.784	27.8342
ENSCSAG00000006782			37.1981	0.0742085	0.0955155	0.775615	0.437977	0.99969	0.250511	0.950811	26.4923	57.2353	26.6726	38.392
ENSCSAG00000013570	ABCF3	ATP binding cassette subfamily F member 3	82.2767	0.0741827	0.11564	0.641399	0.521263	0.99969	0.341979	0.963487	83.7157	91.9233	76.6838	76.784
ENSCSAG00000015756	SCFD1		111.325	0.0741789	0.118228	0.627543	0.530303	0.99969	0.352509	0.964539	118.686	117.072	107.802	101.739
ENSCSAG00000007023	ZNF786		9.35891	0.0740638	0.0637839	1.18114	0.237545	0.99969	0.0801323	0.860783	12.7163	12.1408	7.77952	4.799
ENSCSAG00000013395	USP6NL	USP6 N-terminal like	163.345	0.0740414	0.119223	0.620728	0.534779	0.99969	0.357763	0.965041	158.954	184.714	145.588	164.126
ENSCSAG00000005561	TNS2		48.1631	0.0740329	0.106416	0.696794	0.485932	0.99969	0.301917	0.958841	54.0443	51.1649	50.0112	37.4322
ENSCSAG00000010976	GM2A		27.874	0.0740305	0.0941322	0.787769	0.430832	0.99969	0.243163	0.949399	32.8505	30.352	23.3386	24.9548
ENSCSAG00000012004	SLTM	SAFB like transcription modulator	213.582	0.0740008	0.11886	0.622739	0.533456	0.99969	0.356207	0.964894	234.192	213.332	210.047	196.759
ENSCSAG00000005405	ZNF423	zinc finger protein 423	24.092	0.0739862	0.0894662	0.827433	0.407992	0.99969	0.220244	0.944426	23.3132	32.0864	18.8931	22.0754
ENSCSAG00000013211	LRRCC1	leucine rich repeat and coiled-coil centrosomal protein 1	150.851	0.0739774	0.119105	0.62079	0.534738	0.99969	0.357714	0.965037	151.536	166.503	128.918	156.447
ENSCSAG00000015912		dehydrogenase/reductase 4	56.8499	0.0739649	0.110313	0.670874	0.502301	0.99969	0.320257	0.961106	61.4621	61.5713	54.4566	49.9096
ENSCSAG00000011539	KAT14	lysine acetyltransferase 14	170.914	0.0739027	0.11922	0.619856	0.535353	0.99969	0.358438	0.965105	175.909	182.979	164.481	160.287
ENSCSAG00000016045	TADA2B	transcriptional adaptor 2B	33.0962	0.0738529	0.0977435	0.757723	0.448617	0.99969	0.261607	0.952798	40.2683	33.8208	33.3408	24.9548
ENSCSAG00000006419	MYOF		604.785	0.0738448	0.11508	0.64154	0.521172	0.99969	0.341873	0.963476	573.293	685.089	544.566	616.192
ENSCSAG00000004180			80.9949	0.0737762	0.115442	0.638905	0.522885	0.99969	0.34386	0.963679	83.7157	89.3217	72.2384	78.7036
ENSCSAG00000007086	ZCRB1	zinc finger CCHC-type and RNA binding motif containing 1	176.305	0.0737012	0.119189	0.618403	0.53631	0.99969	0.359566	0.965211	168.491	202.058	187.82	146.849
ENSCSAG00000000613	CREBZF	CREB/ATF bZIP transcription factor	20.0707	0.073635	0.0821931	0.903176	0.366432	0.99969	0.180865	0.933136	27.552	19.9456	22.2272	10.5578
ENSCSAG00000013215	C20orf194	chromosome unknown C20orf194 homolog	184.667	0.0736268	0.119181	0.617885	0.536651	0.99969	0.359968	0.965248	206.64	181.245	172.261	178.523
ENSCSAG00000017548	ADAP1	ArfGAP with dual PH domains 1	70.2502	0.0736185	0.113424	0.649588	0.515958	0.99969	0.335851	0.962845	81.5963	69.3761	66.6816	63.3468
ENSCSAG00000003677	SYTL2		213.613	0.0736004	0.118758	0.619756	0.535418	0.99969	0.358516	0.965112	222.535	224.605	206.713	200.598
ENSCSAG00000005453		homeobox C9	12.945	0.0735869	0.072865	1.01698	0.309164	0.99969	0.131888	0.910527	14.8357	17.344	10.0022	9.598
ENSCSAG00000012505	PCDHB14		6.51431	0.0734853	0.0550414	1.37178	0.170132	0.99969	0.0421176	0.764696	8.47754	10.4064	3.33408	3.8392
ENSCSAG00000004232	CPSF6	cleavage and polyadenylation specific factor 6	339.047	0.0734806	0.11703	0.627876	0.530085	0.99969	0.352253	0.964514	338.042	368.561	343.41	306.176
ENSCSAG00000013579	ZNF182	zinc finger protein 182	13.9719	0.0733826	0.0723072	1.01908	0.308163	0.99969	0.131089	0.910031	15.8954	19.0784	5.5568	15.3568
ENSCSAG00000008213	PRDM15	PR/SET domain 15	40.4394	0.0733456	0.102944	0.712274	0.476295	0.99969	0.291304	0.957405	42.3877	46.8289	32.2294	40.3116
ENSCSAG00000003823	PAK1	p21 (RAC1) activated kinase 1	140.322	0.0733286	0.11904	0.615782	0.538039	0.99969	0.361606	0.9654	144.118	151.76	123.361	142.05
ENSCSAG00000014174	SIX1	SIX homeobox 1	27.4527	0.0733015	0.0917052	0.80296	0.421998	0.99969	0.234195	0.947563	33.9101	28.6176	30.0067	17.2764
ENSCSAG00000014549	SNX21	sorting nexin family member 21	35.1717	0.0732693	0.0969747	0.758831	0.447954	0.99969	0.26091	0.952678	47.6861	31.2192	37.7862	23.995
ENSCSAG00000006851	SP100		144.548	0.0732689	0.119101	0.614976	0.538571	0.99969	0.362235	0.965458	149.417	155.229	126.695	146.849
ENSCSAG00000013149	PIM2		16.8372	0.0732668	0.0798793	0.922854	0.356083	0.99969	0.171547	0.929759	21.1938	19.0784	15.559	11.5176
ENSCSAG00000018104			86.4508	0.0732576	0.115922	0.632449	0.527094	0.99969	0.348758	0.964171	98.5514	85.8529	85.5747	75.8242
ENSCSAG00000006753	ZNF653	zinc finger protein 653	18.0497	0.07324	0.0799278	0.923115	0.355947	0.99969	0.171426	0.929713	28.6117	14.7424	14.4477	14.397
ENSCSAG00000007183	YBEY		45.7602	0.0732347	0.105699	0.692858	0.488399	0.99969	0.304655	0.959196	50.8652	49.4305	36.6749	46.0704
ENSCSAG00000000661			21.1052	0.073226	0.081947	0.897041	0.369697	0.99969	0.183846	0.934148	15.8954	33.8208	22.2272	12.4774
ENSCSAG00000007625	TST	thiosulfate sulfurtransferase	38.6896	0.0732214	0.1001	0.732586	0.463811	0.99969	0.277762	0.955421	37.0892	48.5633	42.2317	26.8744
ENSCSAG00000003844	PITX2	paired like homeodomain 2	32.0509	0.0731161	0.0977127	0.749069	0.453815	0.99969	0.267094	0.953723	37.0892	34.6881	26.6726	29.7538
ENSCSAG00000003764	NSF	N-ethylmaleimide sensitive factor, vesicle fusing ATPase	98.6479	0.0731105	0.117381	0.622915	0.53334	0.99969	0.356071	0.964881	108.089	101.463	90.0201	95.0202
ENSCSAG00000018066	ASMTL		48.8565	0.0731058	0.107237	0.682134	0.495154	0.99969	0.312202	0.960143	50.8652	55.5009	47.7885	41.2714
ENSCSAG00000003021	P3H4	prolyl 3-hydroxylase family member 4 (inactive)	83.1344	0.0730741	0.11545	0.633098	0.52667	0.99969	0.348263	0.964122	95.3723	82.3841	72.2384	82.5428
ENSCSAG00000013425	BAG2	BAG cochaperone 2	31.0791	0.0730724	0.0970428	0.754024	0.450835	0.99969	0.263943	0.953197	34.9698	34.6881	27.784	26.8744
ENSCSAG00000006603	COPRS	coordinator of PRMT5 and differentiation stimulator	150.196	0.0730432	0.118406	0.617614	0.53683	0.99969	0.360179	0.965268	183.327	134.416	161.147	121.895
ENSCSAG00000017802	ZKSCAN5	zinc finger with KRAB and SCAN domains 5	58.1551	0.0730402	0.109608	0.665807	0.505535	0.99969	0.323926	0.96153	52.9846	72.8449	51.1225	55.6684
ENSCSAG00000003521		branched chain keto acid dehydrogenase E1 subunit alpha	77.9523	0.0730399	0.111706	0.65513	0.512384	0.99969	0.331745	0.962403	87.9544	79.7825	92.2428	51.8292
ENSCSAG00000003174	MSMO1	methylsterol monooxygenase 1	195.087	0.0730359	0.119035	0.613466	0.539568	0.99969	0.363415	0.965566	197.103	211.597	184.486	187.161
ENSCSAG00000019211	CHST1	carbohydrate sulfotransferase 1	10.9114	0.0730228	0.06785	1.09025	0.275602	0.99969	0.106255	0.891289	15.8954	12.1408	8.89088	6.7186
ENSCSAG00000006795	STAMBPL1		64.3423	0.07296	0.112092	0.651009	0.515041	0.99969	0.334796	0.962733	64.6412	73.7121	63.3475	55.6684
ENSCSAG00000012259	SEMA3A		16.5792	0.0729162	0.0796103	0.918822	0.358189	0.99969	0.173426	0.930467	18.0148	21.68	12.225	14.397
ENSCSAG00000005395		BLOC-1 related complex subunit 7	10.7773	0.0729079	0.0679558	1.08411	0.278316	0.99969	0.108239	0.893068	13.776	13.8752	7.77952	7.6784
ENSCSAG00000001134	HEYL		28.3686	0.0728463	0.0946533	0.770852	0.440795	0.99969	0.253432	0.95135	32.8505	31.2192	24.4499	24.9548
ENSCSAG00000007670	FGFR1OP2	FGFR1 oncogene partner 2	133.206	0.0728434	0.118841	0.612677	0.54009	0.99969	0.364032	0.965623	128.223	152.627	123.361	128.613
ENSCSAG00000016048		golgi associated PDZ and coiled-coil motif containing	76.2785	0.0728188	0.114831	0.634182	0.525962	0.99969	0.347438	0.96404	81.5963	81.5169	70.0157	71.985
ENSCSAG00000001027	SDC3	uncharacterized LOC103225235	88.3162	0.0728019	0.116275	0.626139	0.531224	0.99969	0.353588	0.964643	89.0141	98.8609	86.686	78.7036
ENSCSAG00000014501	MTURN		24.5245	0.0727992	0.0905463	0.804962	0.420842	0.99969	0.233031	0.947315	27.552	28.6176	18.8931	23.0352
ENSCSAG00000019679	TOR4A	torsin family 4 member A	25.995	0.0727609	0.089978	0.811998	0.416793	0.99969	0.228972	0.946431	38.1489	21.68	21.1158	23.0352
ENSCSAG00000006702			37.0973	0.0727087	0.100153	0.727565	0.46688	0.99969	0.281069	0.955923	48.7458	33.8208	32.2294	33.593
ENSCSAG00000012590	KIF12	kinesin family member 12	29.5125	0.0726213	0.0952689	0.764006	0.444864	0.99969	0.257673	0.952112	37.0892	29.4848	25.5613	25.9146
ENSCSAG00000004645	CMTM3	CKLF like MARVEL transmembrane domain containing 3	38.0599	0.072593	0.0991553	0.731358	0.46456	0.99969	0.278569	0.955545	30.7311	53.7665	32.2294	35.5126
ENSCSAG00000014912	APLF	aprataxin and PNKP like factor	36.7207	0.0725881	0.0993453	0.731009	0.464773	0.99969	0.278798	0.95558	32.8505	48.5633	36.6749	28.794
ENSCSAG00000014886	BBS9	Bardet-Biedl syndrome 9	44.166	0.0725463	0.10368	0.699983	0.483938	0.99969	0.29971	0.958551	54.0443	43.3601	32.2294	47.0302
ENSCSAG00000017291	DNAH5	dynein axonemal heavy chain 5	50.9198	0.0725175	0.106431	0.68049	0.496194	0.99969	0.31337	0.960286	48.7458	62.4385	37.7862	54.7086
ENSCSAG00000014649	FBXO22	F-box protein 22	62.8856	0.072492	0.111589	0.650386	0.515443	0.99969	0.335258	0.962782	73.1188	62.4385	62.2361	53.7488
ENSCSAG00000011083	SEC61B	SEC61 translocon subunit beta	111.354	0.0724747	0.117034	0.618599	0.53618	0.99969	0.359414	0.965196	103.85	132.682	88.9088	119.975
ENSCSAG00000005184		coenzyme Q10A	19.4996	0.0724253	0.0838755	0.867309	0.385773	0.99969	0.198807	0.938801	22.2535	23.4144	18.8931	13.4372
ENSCSAG00000012570	MYNN	myoneurin	72.9018	0.0724221	0.113321	0.638528	0.52313	0.99969	0.344144	0.963708	67.8203	88.4545	63.3475	71.985
ENSCSAG00000016550			79.4726	0.0723973	0.11321	0.64062	0.52177	0.99969	0.342566	0.963547	93.2529	77.1809	88.9088	58.5478
ENSCSAG00000003848	FHOD1	formin homology 2 domain containing 1	38.7766	0.0723774	0.101889	0.710278	0.477532	0.99969	0.292658	0.957594	42.3877	43.3601	30.0067	39.3518
ENSCSAG00000004557	ACADSB	acyl-CoA dehydrogenase short/branched chain	101.03	0.0723131	0.117158	0.61701	0.537228	0.99969	0.360649	0.965311	95.3723	118.807	97.7996	92.1408
ENSCSAG00000013528			186.285	0.0722991	0.119172	0.606828	0.543965	0.99969	0.36863	0.966037	208.759	182.112	176.706	177.563
ENSCSAG00000003579	LTA4H	leukotriene A4 hydrolase	249.625	0.0722286	0.118169	0.611172	0.541086	0.99969	0.365212	0.96573	258.565	262.762	233.386	243.789
ENSCSAG00000011572	CUL7	cullin 7	160.583	0.0722216	0.119199	0.606079	0.544463	0.99969	0.369221	0.966089	185.446	152.627	147.811	156.447
ENSCSAG00000006490	STX10		69.7367	0.0721529	0.110818	0.652599	0.514015	0.99969	0.333616	0.962606	89.0141	61.5713	75.5725	52.789
ENSCSAG00000016193	VAMP5		26.8959	0.0721134	0.090406	0.802046	0.422526	0.99969	0.234728	0.947676	38.1489	23.4144	27.784	18.2362
ENSCSAG00000010760	ZCCHC7	zinc finger CCHC-type containing 7	183.803	0.072093	0.119241	0.604307	0.545639	0.99969	0.370622	0.966213	188.625	197.722	151.145	197.719
ENSCSAG00000004663	LSM14A		130.086	0.0720871	0.118508	0.607833	0.543298	0.99969	0.367837	0.965966	122.924	151.76	112.247	133.412
ENSCSAG00000003754	SYNPO2		25.4828	0.072072	0.0900612	0.79994	0.423746	0.99969	0.235959	0.947935	25.4326	32.9536	16.6704	26.8744
ENSCSAG00000008609	DGAT1	diacylglycerol O-acyltransferase 1	104.545	0.0720638	0.113607	0.635755	0.524936	0.99969	0.346244	0.96392	135.641	88.4545	121.138	72.9448
ENSCSAG00000002857	ZNF778		51.5038	0.0720413	0.108049	0.666405	0.505152	0.99969	0.323491	0.96148	52.9846	58.9697	42.2317	51.8292
ENSCSAG00000018887	GPR160	G protein-coupled receptor 160	48.759	0.0719978	0.103904	0.691767	0.489084	0.99969	0.305418	0.959294	45.5668	61.5713	32.2294	55.6684
ENSCSAG00000015853	RAB3GAP2	RAB3 GTPase activating non-catalytic protein subunit 2	227.437	0.0719934	0.118658	0.606584	0.544127	0.99969	0.368822	0.966054	231.013	244.551	206.713	227.473
ENSCSAG00000008187	ZNF16		59.02	0.0719082	0.110852	0.648515	0.516652	0.99969	0.33665	0.96293	61.4621	65.9073	51.1225	57.588
ENSCSAG00000016085	MRFAP1L1	MORF4 family-associated protein 1	33.7731	0.0718572	0.0971801	0.742129	0.458009	0.99969	0.271551	0.954448	43.4474	32.0864	35.5635	23.995
ENSCSAG00000016736	PCDH7		75.6468	0.0718424	0.1141	0.630306	0.528495	0.99969	0.350393	0.964332	90.0738	71.9777	73.3497	67.186
ENSCSAG00000000794	FBXO2	F-box protein 2	23.0337	0.0718372	0.0886371	0.81293	0.416258	0.99969	0.228438	0.946313	29.6714	23.4144	18.8931	20.1558
ENSCSAG00000013677	THAP10	THAP domain containing 10	11.2064	0.0718065	0.068137	1.06237	0.288069	0.99969	0.1155	0.899113	14.8357	13.8752	5.5568	10.5578
ENSCSAG00000008081	SART1	spliceosome associated factor 1, recruiter of U4/U6.U5 tri-snRNP	207.519	0.0718037	0.119226	0.602755	0.546672	0.99969	0.371852	0.966321	247.968	188.183	221.161	172.764
ENSCSAG00000019607			34.5412	0.071787	0.0993094	0.722807	0.469798	0.99969	0.284227	0.956391	36.0295	40.7585	27.784	33.593
ENSCSAG00000011128	MOCS1		34.2298	0.0717869	0.0978404	0.736176	0.461624	0.99969	0.275415	0.955059	43.4474	32.9536	35.5635	24.9548
ENSCSAG00000011960	PRICKLE2	prickle planar cell polarity protein 2	75.3917	0.0717789	0.114311	0.627578	0.53028	0.99969	0.352482	0.964536	76.2978	84.9857	64.4589	75.8242
ENSCSAG00000004358	TPP1		48.7526	0.0717718	0.106426	0.675366	0.499443	0.99969	0.317027	0.960726	61.4621	45.0945	43.343	45.1106
ENSCSAG00000008470	FXN	frataxin	26.9464	0.0717373	0.0914702	0.787072	0.43124	0.99969	0.243581	0.949482	38.1489	23.4144	22.2272	23.995
ENSCSAG00000013204	PHF19	PHD finger protein 19	45.2461	0.071705	0.105262	0.682391	0.494992	0.99969	0.31202	0.960121	52.9846	45.9617	45.5657	36.4724
ENSCSAG00000005573	SHCBP1		74.9247	0.0716865	0.114314	0.626791	0.530796	0.99969	0.353086	0.964595	75.2381	84.9857	65.5702	73.9046
ENSCSAG00000013317	PREPL	prolyl endopeptidase like	139.27	0.0716589	0.118535	0.604033	0.545822	0.99969	0.370839	0.966232	134.581	159.565	112.247	150.689
ENSCSAG00000010197	NTPCR	nucleoside-triphosphatase, cancer-related	11.5928	0.071646	0.0651837	1.12267	0.261577	0.99969	0.0962545	0.881335	18.0148	12.1408	13.3363	2.8794
ENSCSAG00000004772	CSNK2A2	casein kinase 2 alpha 2	355.569	0.071642	0.117675	0.608596	0.542792	0.99969	0.367236	0.965912	349.698	391.975	303.401	377.202
ENSCSAG00000009866	TAMM41	TAM41 mitochondrial translocator assembly and maintenance homolog	30.2749	0.0716377	0.0940838	0.760592	0.446901	0.99969	0.259805	0.952487	27.552	40.7585	21.1158	31.6734
ENSCSAG00000000449	RPP25L	ribonuclease P/MRP subunit p25 like	23.1276	0.0716375	0.086319	0.835379	0.403505	0.99969	0.215845	0.943358	32.8505	20.8128	24.4499	14.397
ENSCSAG00000005699	NR1H3	nuclear receptor subfamily 1 group H member 3	6.5829	0.0716164	0.0532744	1.38518	0.165997	0.99969	0.0401495	0.755976	11.6566	7.80481	1.11136	5.7588
ENSCSAG00000006082	DTX4	deltex E3 ubiquitin ligase 4	6.5829	0.0716164	0.0532744	1.38518	0.165997	0.99969	0.0401495	0.755976	11.6566	7.80481	1.11136	5.7588
ENSCSAG00000017896	PPP1R35	protein phosphatase 1 regulatory subunit 35	44.2025	0.0716077	0.102322	0.702205	0.482552	0.99969	0.298178	0.958347	59.3428	38.1569	46.6771	32.6332
ENSCSAG00000007897	HFE		75.9694	0.071603	0.114467	0.626	0.531315	0.99969	0.353694	0.964653	87.9544	74.5793	72.2384	69.1056
ENSCSAG00000010939	XPA	XPA, DNA damage recognition and repair factor	51.6175	0.0715087	0.108435	0.659344	0.509675	0.99969	0.328644	0.962061	52.9846	58.9697	45.5657	48.9498
ENSCSAG00000012301	PMS1	PMS1 homolog 1, mismatch repair system component	70.4668	0.071487	0.113192	0.631306	0.527841	0.99969	0.349629	0.964257	66.7606	84.1185	66.6816	64.3066
ENSCSAG00000006512	TEFM	transcription elongation factor, mitochondrial	35.6482	0.0714154	0.0994223	0.720254	0.471368	0.99969	0.285931	0.95664	44.5071	34.6881	35.5635	27.8342
ENSCSAG00000008908	CFB	complement factor B	32.4974	0.0714076	0.0981567	0.72807	0.466571	0.99969	0.280735	0.955873	36.0295	36.4225	27.784	29.7538
ENSCSAG00000011574	ARSI	arylsulfatase family member I	30.5096	0.0713866	0.0946654	0.757117	0.44898	0.99969	0.261989	0.952864	39.2086	29.4848	32.2294	21.1156
ENSCSAG00000005681	ZNF408	prothrombin	51.5064	0.0713742	0.104861	0.682852	0.494701	0.99969	0.311693	0.960081	66.7606	45.9617	57.7907	35.5126
ENSCSAG00000018192	LIMK1	LIM domain kinase 1	223.815	0.0713718	0.118737	0.601238	0.547682	0.99969	0.373057	0.966426	246.908	221.136	218.938	208.277
ENSCSAG00000004789	RAB11FIP2	RAB11 family interacting protein 2	319.44	0.0713674	0.118242	0.603306	0.546305	0.99969	0.371415	0.966283	299.893	366.826	278.951	332.091
ENSCSAG00000003320	WASHC3	WASH complex subunit 3	116.585	0.0713445	0.11808	0.603815	0.545967	0.99969	0.371012	0.966248	116.566	130.08	97.7996	121.895
ENSCSAG00000008139	APOL5		21.4471	0.0713381	0.086155	0.829376	0.406891	0.99969	0.219162	0.944167	20.1342	29.4848	18.8931	17.2764
ENSCSAG00000010107	METTL21A	methyltransferase like 21A	42.9085	0.0713353	0.102028	0.698881	0.484626	0.99969	0.300471	0.958651	49.8055	45.0945	27.784	48.9498
ENSCSAG00000016868	KLF3	Kruppel like factor 3	296.13	0.0712851	0.119147	0.597937	0.549882	0.99969	0.375687	0.966654	252.207	367.693	262.281	302.337
ENSCSAG00000012324	GNL3L		35.0952	0.0712001	0.0991975	0.719608	0.471767	0.99969	0.286364	0.956703	42.3877	35.5553	35.5635	26.8744
ENSCSAG00000007969	RDH14	retinol dehydrogenase 14	44.8413	0.071176	0.104597	0.681492	0.49556	0.99969	0.312658	0.960199	47.6861	50.2977	47.7885	33.593
ENSCSAG00000000090			7.05372	0.0711677	0.0551139	1.32092	0.186527	0.99969	0.0503464	0.795282	6.35815	13.8752	2.22272	5.7588
ENSCSAG00000015782	SH3BP2	SH3 domain binding protein 2	39.4709	0.0711625	0.102897	0.692079	0.488888	0.99969	0.305199	0.959266	43.4474	43.3601	35.5635	35.5126
ENSCSAG00000009437	EXOC4		79.5862	0.0711618	0.11311	0.628256	0.529836	0.99969	0.351962	0.964486	69.9397	100.595	63.3475	84.4624
ENSCSAG00000012462	GULP1		385.297	0.0711412	0.118196	0.601622	0.547425	0.99969	0.372752	0.9664	359.236	444.874	323.406	413.674
ENSCSAG00000001800	SELENBP1	selenium binding protein 1	7.84045	0.0711366	0.0574895	1.27358	0.202812	0.99969	0.0591778	0.820344	15.8954	6.07041	5.5568	3.8392
ENSCSAG00000000795		F-box protein 44	68.0997	0.0710988	0.10935	0.651746	0.514565	0.99969	0.334248	0.962674	79.4769	67.6417	81.1293	44.1508
ENSCSAG00000011066	TJP3		19.8009	0.0710698	0.0825832	0.863806	0.387694	0.99969	0.200627	0.939322	28.6117	18.2112	12.225	20.1558
ENSCSAG00000009917	LRRC6	leucine rich repeat containing 6	18.054	0.0710298	0.0783677	0.909399	0.36314	0.99969	0.177879	0.932089	12.7163	30.352	16.6704	12.4774
ENSCSAG00000004135	TSPAN8	tetraspanin 8	12.2817	0.071005	0.0714736	1.00109	0.316782	0.99969	0.138031	0.914167	15.8954	14.7424	8.89088	9.598
ENSCSAG00000018458	APC2		19.6842	0.0709711	0.0843599	0.843567	0.398911	0.99969	0.211379	0.94223	24.3729	21.68	14.4477	18.2362
ENSCSAG00000001352	DNAJC6	DnaJ heat shock protein family (Hsp40) member C6	630.9	0.070971	0.116174	0.610741	0.541371	0.99969	0.36555	0.965761	604.025	708.503	533.453	677.619
ENSCSAG00000004096	AXIN2	axin 2	86.4182	0.0709197	0.11581	0.611999	0.540539	0.99969	0.364563	0.965671	86.8948	97.1265	73.3497	88.3016
ENSCSAG00000004725	GGA3	golgi associated, gamma adaptin ear containing, ARF binding protein 3	56.072	0.0708246	0.108844	0.650153	0.515593	0.99969	0.335431	0.9628	58.2831	63.3057	42.2317	60.4674
ENSCSAG00000013980	FAM102A	family with sequence similarity 102 member A	79.1633	0.0708009	0.115185	0.614603	0.538817	0.99969	0.362526	0.965485	84.7754	84.1185	70.0157	77.7438
ENSCSAG00000011350	CCNY	cyclin Y	244.871	0.0707962	0.118717	0.596098	0.55111	0.99969	0.377158	0.966779	233.132	278.372	222.272	245.709
ENSCSAG00000003109	AADAT	aminoadipate aminotransferase	15.3833	0.0707792	0.0767935	0.924936	0.354999	0.99969	0.170583	0.92939	19.0745	18.2112	8.89088	15.3568
ENSCSAG00000013604			23.4423	0.070757	0.089351	0.793676	0.427384	0.99969	0.239648	0.948695	28.6117	25.1488	18.8931	21.1156
ENSCSAG00000012149	NDUFS7	NADH:ubiquinone oxidoreductase core subunit S7	161.947	0.0707299	0.1189	0.595444	0.551546	0.99969	0.377681	0.966824	192.864	148.291	172.261	134.372
ENSCSAG00000013850	ALAS1	5'-aminolevulinate synthase 1	116.323	0.0707059	0.118331	0.597424	0.550224	0.99969	0.376097	0.966689	114.447	130.947	113.359	106.538
ENSCSAG00000007827	SYT17	synaptotagmin 17	23.9953	0.0706791	0.0896442	0.790401	0.429293	0.99969	0.241592	0.949087	30.7311	24.2816	18.8931	22.0754
ENSCSAG00000011985	COP1		380.538	0.0706698	0.116232	0.607888	0.543262	0.99969	0.367794	0.965962	375.131	416.257	354.524	376.242
ENSCSAG00000004756	SFXN4	sideroflexin 4	45.1727	0.0706629	0.105567	0.669656	0.503077	0.99969	0.321136	0.961209	51.9249	46.8289	37.7862	44.1508
ENSCSAG00000001445	GTF2B	general transcription factor IIB	115.85	0.0706062	0.1184	0.596309	0.550969	0.99969	0.376988	0.966765	125.044	119.674	104.468	114.216
ENSCSAG00000010928	ZNF485		10.1004	0.0705791	0.065453	1.08786	0.276657	0.99969	0.107024	0.891986	10.5969	15.6096	5.5568	8.6382
ENSCSAG00000010607	NPHP3		55.1516	0.0705268	0.109457	0.644247	0.519415	0.99969	0.33984	0.963265	60.4025	58.9697	45.5657	55.6684
ENSCSAG00000012971	HACD3	3-hydroxyacyl-CoA dehydratase 3	134.398	0.0705259	0.118756	0.594266	0.552334	0.99969	0.378625	0.966904	156.834	126.611	132.252	121.895
ENSCSAG00000002832	SPHK2	sphingosine kinase 2	34.2677	0.0705205	0.0974745	0.726065	0.467799	0.99969	0.282062	0.956071	43.4474	32.9536	36.6749	23.995
ENSCSAG00000011604	KLC4	kinesin light chain 4	38.0399	0.0704222	0.10012	0.705161	0.48071	0.99969	0.296149	0.958073	42.3877	41.6257	42.2317	25.9146
ENSCSAG00000012557	RCAN2	regulator of calcineurin 2	30.6879	0.0704132	0.0960874	0.734412	0.462698	0.99969	0.276567	0.955237	33.9101	34.6881	31.1181	23.0352
ENSCSAG00000018063	AKAP17A		84.8535	0.0703996	0.115472	0.610278	0.541678	0.99969	0.365914	0.965793	97.4917	83.2513	86.686	71.985
ENSCSAG00000006690	FASTK	Fas activated serine/threonine kinase	54.896	0.0703873	0.108814	0.647404	0.517371	0.99969	0.337479	0.963018	56.1637	62.4385	57.7907	43.191
ENSCSAG00000016320	NCOA7	nuclear receptor coactivator 7	162.409	0.0703617	0.119042	0.590635	0.554765	0.99969	0.381545	0.967149	157.894	183.847	132.252	175.643
ENSCSAG00000016562	ADGRA3		289.005	0.0703573	0.1175	0.598707	0.549368	0.99969	0.375072	0.966601	297.773	304.388	267.838	286.021
ENSCSAG00000018294	VKORC1L1		43.0303	0.070329	0.104121	0.676724	0.498581	0.99969	0.316055	0.96061	50.8652	43.3601	43.343	34.5528
ENSCSAG00000005648	LARGE2	LARGE xylosyl- and glucuronyltransferase 2	11.6529	0.0703087	0.0695541	1.01741	0.308959	0.99969	0.131724	0.910426	13.776	15.6096	6.66816	10.5578
ENSCSAG00000008491	ZNF879		13.3395	0.0703084	0.07318	0.967585	0.333252	0.99969	0.151709	0.921297	19.0745	13.8752	8.89088	11.5176
ENSCSAG00000008189	LRRC8E	leucine rich repeat containing 8 VRAC subunit E	61.5327	0.0703021	0.110537	0.637017	0.524114	0.99969	0.345287	0.963824	70.9994	61.5713	65.5702	47.99
ENSCSAG00000007070			103.157	0.0702902	0.117116	0.599805	0.548636	0.99969	0.374198	0.966525	107.029	111.869	83.352	110.377
ENSCSAG00000001626	ZNF530		11.8147	0.0702886	0.0702723	1.00964	0.312668	0.99969	0.134699	0.91223	14.8357	14.7424	10.0022	7.6784
ENSCSAG00000018760	CENPB	centromere protein B	144.013	0.0702829	0.117685	0.598059	0.549801	0.99969	0.37559	0.966645	179.088	125.744	158.924	112.297
ENSCSAG00000013356	HIC2	HIC ZBTB transcriptional repressor 2	9.65722	0.0702755	0.0646614	1.10207	0.270433	0.99969	0.102519	0.887772	14.8357	10.4064	6.66816	6.7186
ENSCSAG00000014870	POMT1	protein O-mannosyltransferase 1	76.2503	0.070237	0.114016	0.616471	0.537584	0.99969	0.361069	0.96535	92.1932	71.1105	67.7929	73.9046
ENSCSAG00000002978	WASHC4		683.262	0.0701647	0.11427	0.613911	0.539274	0.99969	0.363067	0.965534	665.487	752.731	604.58	710.252
ENSCSAG00000006483	RAB3IL1	RAB3A interacting protein like 1	13.4256	0.0701595	0.0731657	0.966992	0.333548	0.99969	0.15196	0.921417	20.1342	13.008	10.0022	10.5578
ENSCSAG00000011346	TAF8		37.2172	0.0701467	0.101479	0.69166	0.489151	0.99969	0.305492	0.959303	41.328	40.7585	32.2294	34.5528
ENSCSAG00000005044	ZNF14		18.5403	0.0701095	0.0826169	0.85018	0.395225	0.99969	0.207821	0.941299	20.1342	23.4144	13.3363	17.2764
ENSCSAG00000003207	FNIP2	folliculin interacting protein 2	38.0282	0.0701012	0.101475	0.692123	0.48886	0.99969	0.305169	0.959262	46.6265	37.2897	35.5635	32.6332
ENSCSAG00000002668	NDUFS2	NADH:ubiquinone oxidoreductase core subunit S2	269.451	0.0700872	0.11877	0.590413	0.554914	0.99969	0.381724	0.967164	306.251	256.692	284.508	230.352
ENSCSAG00000017226	AKAP13		569.676	0.0700826	0.113668	0.616496	0.537567	0.99969	0.36105	0.965349	560.577	620.916	550.123	547.086
ENSCSAG00000001642	DCLRE1B	DNA cross-link repair 1B	31.704	0.0700666	0.0958445	0.733243	0.46341	0.99969	0.277332	0.955355	43.4474	27.7504	27.784	27.8342
ENSCSAG00000012196	NDUFAF7	NADH:ubiquinone oxidoreductase complex assembly factor 7	32.1229	0.0700589	0.0963038	0.729286	0.465826	0.99969	0.279932	0.955752	43.4474	28.6176	26.6726	29.7538
ENSCSAG00000010618	GUCD1		233.343	0.0700539	0.118812	0.589805	0.555322	0.99969	0.382215	0.967204	247.968	239.348	244.499	201.558
ENSCSAG00000014539	CHN1	chimerin 1	156.896	0.0700136	0.118817	0.588868	0.55595	0.99969	0.382971	0.967267	135.641	194.253	148.922	148.769
ENSCSAG00000014580	USP34	ubiquitin specific peptidase 34	680.77	0.0699582	0.113913	0.614027	0.539198	0.99969	0.362976	0.965526	657.009	755.332	616.805	693.936
ENSCSAG00000015260	ATP9A	ATPase phospholipid transporting 9A (putative)	375.222	0.0699033	0.117063	0.596959	0.550535	0.99969	0.376468	0.966721	365.594	415.389	331.185	388.719
ENSCSAG00000005252	YTHDC1	YTH domain containing 1	341.343	0.069882	0.116517	0.599694	0.54871	0.99969	0.374286	0.966533	346.519	363.357	323.406	332.091
ENSCSAG00000000447	MYORG	myogenesis regulating glycosidase (putative)	14.2025	0.0698766	0.0741362	0.951743	0.341227	0.99969	0.158525	0.924425	19.0745	15.6096	14.4477	7.6784
ENSCSAG00000017406		zinc finger protein 501-like	19.207	0.0698764	0.083967	0.834945	0.403749	0.99969	0.216084	0.943417	22.2535	22.5472	16.6704	15.3568
ENSCSAG00000011493	SGTA	small glutamine rich tetratricopeptide repeat containing alpha	135.162	0.0698694	0.118539	0.589958	0.555219	0.99969	0.382091	0.967194	155.775	129.213	143.365	112.297
ENSCSAG00000011741	SPTLC2		165.323	0.0698678	0.119197	0.586525	0.557523	0.99969	0.384867	0.967423	187.566	159.565	171.149	143.01
ENSCSAG00000008751	BDH1	3-hydroxybutyrate dehydrogenase 1	44.3626	0.0698658	0.105314	0.664189	0.506569	0.99969	0.325103	0.961664	50.8652	45.9617	42.2317	38.392
ENSCSAG00000013910	FAM83D		174.206	0.0698563	0.119231	0.585546	0.558181	0.99969	0.385661	0.967488	169.551	195.987	148.922	182.362
ENSCSAG00000006682	SLC35D2		69.5931	0.0698266	0.113555	0.614934	0.538598	0.99969	0.362267	0.965461	75.2381	73.7121	62.2361	67.186
ENSCSAG00000014247	MRM3		49.6233	0.0697739	0.106275	0.657134	0.511095	0.99969	0.330268	0.962241	48.7458	58.9697	53.3453	37.4322
ENSCSAG00000003853	PLEKHG2	pleckstrin homology and RhoGEF domain containing G2	79.1672	0.0697601	0.115062	0.606046	0.544484	0.99969	0.369247	0.966092	78.4172	90.1889	72.2384	75.8242
ENSCSAG00000006932	ANKRD13B		20.0802	0.0697404	0.0839656	0.834814	0.403823	0.99969	0.216156	0.943435	23.3132	23.4144	21.1158	12.4774
ENSCSAG00000014496	ACVR2B		39.5049	0.0697233	0.10206	0.68427	0.493805	0.99969	0.310689	0.959957	49.8055	37.2897	34.4521	36.4724
ENSCSAG00000006889	SP140L		13.2433	0.0695509	0.0733798	0.953322	0.340427	0.99969	0.157835	0.92412	16.9551	15.6096	8.89088	11.5176
ENSCSAG00000002553	ALDH16A1	aldehyde dehydrogenase 16 family member A1	53.9226	0.0695263	0.102072	0.68406	0.493937	0.99969	0.310837	0.959975	75.2381	43.3601	64.4589	32.6332
ENSCSAG00000014521			67.5431	0.0695244	0.112201	0.620473	0.534946	0.99969	0.35796	0.96506	82.656	62.4385	65.5702	59.5076
ENSCSAG00000014206			6.03325	0.0695094	0.0519686	1.38997	0.164538	0.99969	0.0394651	0.75279	12.7163	5.20321	3.33408	2.8794
ENSCSAG00000003060	AGA	aspartylglucosaminidase	107.67	0.0695056	0.116872	0.594786	0.551987	0.99969	0.378209	0.966869	128.223	100.595	86.686	115.176
ENSCSAG00000014803	TXLNG		51.2642	0.069496	0.10815	0.642793	0.520358	0.99969	0.340931	0.963379	51.9249	58.9697	50.0112	44.1508
ENSCSAG00000001476	CCDC18		77.4679	0.0694949	0.114329	0.607723	0.543371	0.99969	0.367923	0.965974	73.1188	91.9233	76.6838	68.1458
ENSCSAG00000003509	ELMOD2	ELMO domain containing 2	82.1066	0.0694928	0.115281	0.602697	0.546711	0.99969	0.371899	0.966325	90.0738	84.9857	68.9043	84.4624
ENSCSAG00000015424	TATDN3	TatD DNase domain containing 3	25.3929	0.0694735	0.0882467	0.787499	0.43099	0.99969	0.243325	0.949431	30.7311	27.7504	13.3363	29.7538
ENSCSAG00000005929	ZNF654	zinc finger protein 654	33.3502	0.0694728	0.0979588	0.710424	0.477441	0.99969	0.292558	0.95758	34.9698	39.0241	34.4521	24.9548
ENSCSAG00000015265	DNAAF2	dynein axonemal assembly factor 2	40.5705	0.0694526	0.103066	0.674109	0.500242	0.99969	0.317929	0.960833	40.2683	48.5633	38.8976	34.5528
ENSCSAG00000002552	CENATAC		20.7192	0.0694442	0.0842916	0.828822	0.407205	0.99969	0.21947	0.944241	26.4923	21.68	22.2272	12.4774
ENSCSAG00000012678		melanoma-associated antigen D4	98.985	0.0694053	0.117071	0.593306	0.552976	0.99969	0.379396	0.966969	114.447	95.3921	97.7996	88.3016
ENSCSAG00000017435	GRTP1	growth hormone regulated TBC protein 1	5.84076	0.0693929	0.0525522	1.36301	0.17288	0.99969	0.0434497	0.770253	8.47754	8.67201	3.33408	2.8794
ENSCSAG00000001472	DIPK1A	divergent protein kinase domain 1A	92.7045	0.0693845	0.116413	0.595592	0.551448	0.99969	0.377562	0.966814	90.0738	106.666	80.0179	94.0604
ENSCSAG00000011081	PKP3	plakophilin 3	39.4985	0.0693349	0.102779	0.675201	0.499548	0.99969	0.317146	0.96074	42.3877	44.2273	37.7862	33.593
ENSCSAG00000014874	SLC2A10		117.276	0.0692809	0.118151	0.586682	0.557417	0.99969	0.38474	0.967413	137.76	110.135	108.913	112.297
ENSCSAG00000017651	ESCO1	establishment of sister chromatid cohesion N-acetyltransferase 1	177.526	0.0692474	0.119199	0.580616	0.561499	0.99969	0.389673	0.967812	181.207	191.651	143.365	193.88
ENSCSAG00000008945		N-deacetylase and N-sulfotransferase 2	36.7881	0.0692366	0.101182	0.684962	0.493368	0.99969	0.3102	0.959896	40.2683	40.7585	34.4521	31.6734
ENSCSAG00000004014	ZDHHC17	zinc finger DHHC-type palmitoyltransferase 17	121.021	0.0692218	0.117447	0.588772	0.556014	0.99969	0.383049	0.967274	104.91	150.893	104.468	123.814
ENSCSAG00000005438	PSD	pleckstrin and Sec7 domain containing	6.34563	0.0692055	0.0544775	1.30411	0.192196	0.99969	0.0533475	0.804547	9.53723	8.67201	3.33408	3.8392
ENSCSAG00000004768			55.6131	0.0692011	0.109692	0.631248	0.527878	0.99969	0.349673	0.964261	58.2831	61.5713	55.568	47.0302
ENSCSAG00000005206	CCDC34		83.5659	0.0691987	0.114558	0.603901	0.54591	0.99969	0.370944	0.966242	95.3723	83.2513	64.4589	91.181
ENSCSAG00000011577	TIMM13	translocase of inner mitochondrial membrane 13	64.8784	0.0691884	0.110335	0.62842	0.529729	0.99969	0.351837	0.964473	82.656	57.2353	67.7929	51.8292
ENSCSAG00000013953	PLCG1		231.896	0.0691589	0.118452	0.583844	0.559325	0.99969	0.387043	0.9676	242.67	241.082	221.161	222.674
ENSCSAG00000015355	ARIH2	E3 ubiquitin-protein ligase ARIH2	140.407	0.0691569	0.118687	0.582414	0.560288	0.99969	0.388207	0.967694	126.103	169.104	137.809	128.613
ENSCSAG00000002821			48.0683	0.0691523	0.105719	0.653373	0.513516	0.99969	0.333043	0.962544	46.6265	58.1025	36.6749	50.8694
ENSCSAG00000012714	PDRG1	p53 and DNA damage regulated 1	91.2827	0.0691197	0.116153	0.595544	0.55148	0.99969	0.377601	0.966817	109.148	84.9857	85.5747	85.4222
ENSCSAG00000019434	KRCC1	lysine rich coiled-coil 1	67.7709	0.0690363	0.112357	0.615071	0.538508	0.99969	0.362161	0.965451	73.1188	71.9777	72.2384	53.7488
ENSCSAG00000016729			20.0516	0.069033	0.08273	0.83448	0.404011	0.99969	0.21634	0.94348	20.1342	26.8832	11.1136	22.0754
ENSCSAG00000016791	HBS1L		110.415	0.0690261	0.117516	0.586962	0.55723	0.99969	0.384513	0.967394	112.327	121.408	88.9088	119.015
ENSCSAG00000017771	SMURF1	SMAD specific E3 ubiquitin protein ligase 1	176.09	0.0690104	0.11924	0.5785	0.562926	0.99969	0.391404	0.96795	181.207	188.183	147.811	187.161
ENSCSAG00000016201	CNIH4	cornichon family AMPA receptor auxiliary protein 4	72.8857	0.0689863	0.113602	0.607497	0.543521	0.99969	0.368102	0.96599	73.1188	82.3841	75.5725	60.4674
ENSCSAG00000000052	ARMCX1		36.3756	0.068952	0.0996865	0.693241	0.488158	0.99969	0.304388	0.959162	47.6861	32.9536	32.2294	32.6332
ENSCSAG00000018716	WDR5B	WD repeat domain 5B	15.521	0.0689468	0.072075	0.95904	0.337539	0.99969	0.155357	0.923003	15.8954	22.5472	4.44544	19.196
ENSCSAG00000009980	AQP3		10.1519	0.0689346	0.066069	1.05659	0.2907	0.99969	0.117494	0.900654	14.8357	11.2736	7.77952	6.7186
ENSCSAG00000013159	PQBP1	polyglutamine binding protein 1	56.5724	0.0688958	0.10912	0.632164	0.52728	0.99969	0.348975	0.964192	60.4025	61.5713	61.1248	43.191
ENSCSAG00000019508		60S ribosomal protein L11-like	108.287	0.0688758	0.116467	0.591351	0.554286	0.99969	0.380969	0.967101	96.432	132.682	116.693	87.3418
ENSCSAG00000000960	STMN1	stathmin 1	283.445	0.0688737	0.117565	0.585848	0.557978	0.99969	0.385416	0.967468	292.475	297.45	278.951	264.905
ENSCSAG00000003780			10.6188	0.0688162	0.067036	1.03738	0.299557	0.99969	0.12431	0.905588	15.8954	11.2736	6.66816	8.6382
ENSCSAG00000010113	VHL	von Hippel-Lindau tumor suppressor	183.988	0.0687738	0.119217	0.576865	0.564031	0.99969	0.392744	0.968056	203.461	182.112	162.259	188.121
ENSCSAG00000003198	MMP1	matrix metallopeptidase 1	171.955	0.0687528	0.119237	0.576309	0.564407	0.99969	0.3932	0.968091	170.61	189.917	147.811	179.483
ENSCSAG00000007575	DTNBP1	dystrobrevin binding protein 1	60.467	0.068738	0.111107	0.619176	0.535801	0.99969	0.358966	0.965154	65.7009	64.1729	61.1248	50.8694
ENSCSAG00000002728	GRB7	growth factor receptor bound protein 7	280.905	0.0686866	0.118975	0.57764	0.563508	0.99969	0.392109	0.968005	323.206	263.629	304.513	232.272
ENSCSAG00000010064			75.3853	0.0686314	0.113735	0.602932	0.546554	0.99969	0.371712	0.966309	68.88	91.9233	67.7929	72.9448
ENSCSAG00000000933	GALE	UDP-galactose-4-epimerase	51.1981	0.0685764	0.107744	0.637262	0.523954	0.99969	0.345102	0.963805	62.5218	48.5633	46.6771	47.0302
ENSCSAG00000016518	LCORL		35.3308	0.0685157	0.0987619	0.693075	0.488262	0.99969	0.304504	0.959177	34.9698	43.3601	25.5613	37.4322
ENSCSAG00000002145	DIABLO		192.614	0.0685045	0.119203	0.574975	0.565308	0.99969	0.394296	0.968177	219.356	183.847	194.488	172.764
ENSCSAG00000004933	RSPRY1	ring finger and SPRY domain containing 1	135.087	0.0684288	0.118858	0.575405	0.565018	0.99969	0.393943	0.96815	131.402	152.627	120.027	136.292
ENSCSAG00000006558	MAST1	microtubule associated serine/threonine kinase 1	19.812	0.0684227	0.0838613	0.818117	0.41329	0.99969	0.225483	0.945647	19.0745	26.8832	18.8931	14.397
ENSCSAG00000019408	ARF6	ADP ribosylation factor 6	144.218	0.0683989	0.119161	0.574051	0.565933	0.99969	0.395057	0.968237	152.596	150.026	138.92	135.332
ENSCSAG00000007038	PRKG1		64.0142	0.0683789	0.11186	0.610885	0.541276	0.99969	0.365437	0.96575	63.5815	73.7121	54.4566	64.3066
ENSCSAG00000016621	ZNF197	zinc finger protein 197	26.3238	0.0683458	0.0909138	0.751556	0.452318	0.99969	0.265509	0.95346	28.6117	31.2192	16.6704	28.794
ENSCSAG00000001280	COA7	cytochrome c oxidase assembly factor 7	91.1763	0.0682813	0.116404	0.586978	0.557219	0.99969	0.3845	0.967393	105.969	87.5873	86.686	84.4624
ENSCSAG00000012162	GFM1	G elongation factor mitochondrial 1	221.287	0.0682488	0.118865	0.573983	0.565979	0.99969	0.395113	0.968241	223.595	238.48	195.599	227.473
ENSCSAG00000015407	CERT1	ceramide transporter 1	54.321	0.0682039	0.109476	0.623249	0.533121	0.99969	0.355813	0.964857	57.2234	59.8369	52.2339	47.99
ENSCSAG00000001482	ABCA4		183.295	0.0681922	0.119201	0.571863	0.567415	0.99969	0.396861	0.968376	182.267	201.191	164.481	185.241
ENSCSAG00000013653	USP11	ubiquitin specific peptidase 11	108.852	0.0681593	0.117565	0.57954	0.562225	0.99969	0.390553	0.967882	117.626	112.736	88.9088	116.136
ENSCSAG00000009578	TUBB4A	tubulin beta 4A class IVa	21.6832	0.0681216	0.0871048	0.78375	0.433187	0.99969	0.245576	0.949872	26.4923	23.4144	16.6704	20.1558
ENSCSAG00000001400	MIGA1	mitoguardin 1	139.26	0.068054	0.118981	0.571898	0.567391	0.99969	0.396831	0.968374	151.536	141.354	121.138	143.01
ENSCSAG00000019283	TOB2	transducer of ERBB2, 2	35.3114	0.0680323	0.0997009	0.683263	0.494441	0.99969	0.311402	0.960045	37.0892	40.7585	35.5635	27.8342
ENSCSAG00000007078	TPK1		16.2983	0.0680206	0.0766788	0.891653	0.372579	0.99969	0.186493	0.935022	13.776	25.1488	16.6704	9.598
ENSCSAG00000009996	UBE2R2	ubiquitin conjugating enzyme E2 R2	247.013	0.0679527	0.118268	0.574589	0.56557	0.99969	0.394614	0.968202	265.983	248.887	232.274	240.91
ENSCSAG00000015815	PURG	purine rich element binding protein G	27.9662	0.067934	0.0930635	0.729543	0.465669	0.99969	0.279763	0.955726	26.4923	36.4225	21.1158	27.8342
ENSCSAG00000016950	CTSB	cathepsin B	99.5812	0.0679234	0.116604	0.582961	0.559919	0.99969	0.387762	0.967658	104.91	105.799	108.913	78.7036
ENSCSAG00000013825	RTN4RL1	reticulon 4 receptor like 1	22.2741	0.0678734	0.0876666	0.776357	0.437538	0.99969	0.250058	0.950726	28.6117	22.5472	17.7818	20.1558
ENSCSAG00000001763	TNNT1	troponin T1, slow skeletal type	267.557	0.0678677	0.119233	0.569693	0.568886	0.99969	0.398654	0.968514	327.445	233.277	294.51	214.995
ENSCSAG00000005697	ACP2	acid phosphatase 2, lysosomal	25.7694	0.0678637	0.0888464	0.767918	0.442536	0.99969	0.255244	0.951679	31.7908	26.8832	30.0067	14.397
ENSCSAG00000000154	LRRC8D	leucine rich repeat containing 8 VRAC subunit D	184.555	0.0677787	0.119236	0.568214	0.56989	0.99969	0.39988	0.968608	171.67	214.199	176.706	175.643
ENSCSAG00000003597	MFSD8		24.4695	0.067777	0.0906244	0.749664	0.453457	0.99969	0.266714	0.95366	28.6117	26.8832	22.2272	20.1558
ENSCSAG00000001643	ZNF304		87.8404	0.067765	0.115512	0.586102	0.557807	0.99969	0.38521	0.967451	81.5963	104.931	75.5725	89.2614
ENSCSAG00000016416	BST1	bone marrow stromal cell antigen 1	145.042	0.0677615	0.118167	0.572825	0.566763	0.99969	0.396067	0.968315	126.103	179.511	120.027	154.528
ENSCSAG00000007962	XYLT1		11.9867	0.0676445	0.0692242	0.989702	0.32232	0.99969	0.14257	0.916672	16.9551	13.008	12.225	5.7588
ENSCSAG00000017121	IDH2	isocitrate dehydrogenase (NADP(+)) 2	96.8669	0.0676257	0.116826	0.578852	0.562689	0.99969	0.391116	0.967927	109.148	96.2593	82.2406	99.8192
ENSCSAG00000001743	SEC22B	SEC22 homolog B, vesicle trafficking protein	76.5602	0.0675305	0.114617	0.589063	0.555819	0.99969	0.382813	0.967254	75.2381	87.5873	73.3497	70.0654
ENSCSAG00000007634	KIF13A	kinesin family member 13A	257.843	0.067516	0.118246	0.570855	0.568098	0.99969	0.397693	0.968441	264.923	272.301	231.163	262.985
ENSCSAG00000015690	PPIA	peptidyl-prolyl cis-trans isomerase A	20.0239	0.067501	0.0810256	0.833097	0.40479	0.99969	0.217102	0.943667	21.1938	26.016	8.89088	23.995
ENSCSAG00000015261	ZNF638	zinc finger protein 638	288.999	0.0674902	0.117815	0.572715	0.566838	0.99969	0.396158	0.968322	294.594	306.989	257.835	296.578
ENSCSAG00000018290			17.9149	0.0674607	0.0818858	0.82602	0.408793	0.99969	0.221033	0.944614	21.1938	20.8128	13.3363	16.3166
ENSCSAG00000019309	FKBPL	FKBP prolyl isomerase like	11.22	0.0674573	0.0671906	1.01545	0.309892	0.99969	0.13247	0.910885	19.0745	9.53921	6.66816	9.598
ENSCSAG00000012493	GTPBP10	GTP binding protein 10	53.0771	0.0674333	0.109137	0.618071	0.536529	0.99969	0.359824	0.965235	57.2234	57.2353	48.8998	48.9498
ENSCSAG00000006339	PKN1	protein kinase N1	220.001	0.0674014	0.119023	0.56654	0.571027	0.99969	0.40127	0.968713	253.266	206.394	217.826	202.518
ENSCSAG00000008414	CLEC16A	C-type lectin domain containing 16A	118.41	0.067374	0.118563	0.568274	0.569849	0.99969	0.39983	0.968604	126.103	123.143	111.136	113.256
ENSCSAG00000011805	BTBD3	BTB domain containing 3	120.982	0.067341	0.118602	0.56784	0.570143	0.99969	0.40019	0.968631	132.462	122.275	111.136	118.055
ENSCSAG00000010808	SAP30L	SAP30 like	160.853	0.0673257	0.119229	0.564833	0.572187	0.99969	0.402691	0.96882	168.491	168.237	165.593	141.091
ENSCSAG00000018469	CMTR2	cap methyltransferase 2	33.3385	0.0673198	0.0985699	0.68363	0.494209	0.99969	0.311142	0.960013	39.2086	34.6881	27.784	31.6734
ENSCSAG00000011076	KIF6		23.7602	0.0673052	0.0855886	0.791331	0.428751	0.99969	0.241039	0.948976	28.6117	26.016	28.8953	11.5176
ENSCSAG00000015675	ARHGAP5	Rho GTPase activating protein 5	463.916	0.0672528	0.117649	0.571416	0.567718	0.99969	0.39723	0.968405	428.116	536.798	394.533	496.217
ENSCSAG00000012685	MAGED1	MAGE family member D1	63.0938	0.0672372	0.112104	0.599748	0.548675	0.99969	0.374243	0.966529	65.7009	69.3761	57.7907	59.5076
ENSCSAG00000011760	PALM2AKAP2	PALM2 and AKAP2 fusion	51.7676	0.067191	0.108122	0.621446	0.534306	0.99969	0.357207	0.964989	58.2831	53.7665	42.2317	52.789
ENSCSAG00000011155	RPS4X	40S ribosomal protein S4, X isoform-like	58.8931	0.067173	0.110458	0.607855	0.543284	0.99969	0.36782	0.965965	56.1637	70.2433	54.4566	54.7086
ENSCSAG00000017018	SLCO3A1		42.7265	0.067164	0.104232	0.644187	0.519454	0.99969	0.339885	0.96327	45.5668	47.6961	34.4521	43.191
ENSCSAG00000018731		ribosomal protein S10	20.8353	0.0671556	0.0858298	0.785545	0.432134	0.99969	0.244496	0.949661	25.4326	22.5472	20.0045	15.3568
ENSCSAG00000010327	ABI2		57.118	0.0671014	0.108953	0.615666	0.538115	0.99969	0.361697	0.965408	50.8652	71.9777	56.6793	48.9498
ENSCSAG00000008053			13.8137	0.0670575	0.0745765	0.905156	0.365383	0.99969	0.179911	0.932805	16.9551	16.4768	12.225	9.598
ENSCSAG00000005429	RSAD1	radical S-adenosyl methionine domain containing 1	11.53	0.0670488	0.0674905	1.00833	0.313295	0.99969	0.135204	0.91253	16.9551	12.1408	12.225	4.799
ENSCSAG00000003090	HPGD	15-hydroxyprostaglandin dehydrogenase	279.187	0.0670159	0.118995	0.562871	0.573523	0.99969	0.404326	0.968942	268.102	314.794	226.717	307.136
ENSCSAG00000003438	ANAPC10	anaphase promoting complex subunit 10	56.0208	0.0670012	0.109258	0.612701	0.540074	0.99969	0.364013	0.965621	52.9846	67.6417	47.7885	55.6684
ENSCSAG00000012435	ADAM22		20.4636	0.0669859	0.0847303	0.79108	0.428897	0.99969	0.241188	0.949006	22.2535	25.1488	13.3363	21.1156
ENSCSAG00000015484	MBIP	MAP3K12 binding inhibitory protein 1	54.7906	0.06695	0.105955	0.630698	0.528238	0.99969	0.350094	0.964303	48.7458	70.2433	37.7862	62.387
ENSCSAG00000013945	FAM126A	family with sequence similarity 126 member A	100.166	0.0668966	0.11742	0.569514	0.569007	0.99969	0.398803	0.968526	99.6111	111.869	92.2428	96.9398
ENSCSAG00000017909	PDS5B	PDS5 cohesin associated factor B	136.545	0.0668859	0.118314	0.564826	0.572192	0.99969	0.402696	0.96882	132.462	155.229	107.802	150.689
ENSCSAG00000006937	PAPSS2	3'-phosphoadenosine 5'-phosphosulfate synthase 2	39.0442	0.0668769	0.102357	0.653283	0.513574	0.99969	0.33311	0.962551	41.328	44.2273	32.2294	38.392
ENSCSAG00000006989			61.6828	0.0668365	0.110409	0.606401	0.544248	0.99969	0.368966	0.966067	76.2978	56.3681	62.2361	51.8292
ENSCSAG00000007954	ZNF184		86.6858	0.0667593	0.115915	0.575584	0.564896	0.99969	0.393796	0.968138	85.8351	97.9937	75.5725	87.3418
ENSCSAG00000000698			63.1658	0.0667343	0.111963	0.596365	0.550931	0.99969	0.376944	0.966761	72.0591	63.3057	57.7907	59.5076
ENSCSAG00000004857	DRC7	dynein regulatory complex subunit 7	14.219	0.0667032	0.074296	0.900377	0.36792	0.99969	0.18222	0.9336	12.7163	21.68	10.0022	12.4774
ENSCSAG00000010718			11.6703	0.0666935	0.0694349	0.967823	0.333133	0.99969	0.151608	0.921249	11.6566	17.344	10.0022	7.6784
ENSCSAG00000001165	PPCS	coiled-coil domain containing 30	77.0786	0.0666907	0.114921	0.580412	0.561637	0.99969	0.389841	0.967825	80.5366	83.2513	74.4611	70.0654
ENSCSAG00000012663	NCF2	neutrophil cytosolic factor 2	44.8699	0.0666027	0.105302	0.632599	0.526996	0.99969	0.348643	0.96416	50.8652	46.8289	36.6749	45.1106
ENSCSAG00000011521	TTC8	tetratricopeptide repeat domain 8	40.8071	0.0665958	0.102555	0.648991	0.516344	0.99969	0.336296	0.962893	37.0892	52.0321	36.6749	37.4322
ENSCSAG00000001506	TRMT13	tRNA methyltransferase 13 homolog	29.1892	0.0665606	0.0953407	0.699348	0.484334	0.99969	0.300148	0.958609	33.9101	31.2192	26.6726	24.9548
ENSCSAG00000003057	CYBA	cytochrome b-245 light chain	276.587	0.0665602	0.119088	0.55928	0.575971	0.99969	0.407331	0.969164	318.967	258.426	303.401	225.553
ENSCSAG00000010898	TDRD7	tudor domain containing 7	62.9461	0.0665364	0.111373	0.596959	0.550535	0.99969	0.376468	0.96672	59.3428	75.4465	55.568	61.4272
ENSCSAG00000010286	STK38	serine/threonine kinase 38	156.762	0.0665	0.118665	0.559865	0.575571	0.99969	0.406841	0.969128	143.058	186.448	126.695	170.844
ENSCSAG00000001041	SPOCD1		10.7087	0.0664975	0.0665704	1.00959	0.312693	0.99969	0.134719	0.912242	10.5969	16.4768	10.0022	5.7588
ENSCSAG00000005408	ARL3		53.2545	0.066412	0.107646	0.616922	0.537286	0.99969	0.360718	0.965318	62.5218	52.8993	40.0089	57.588
ENSCSAG00000015888	PIK3R1	phosphoinositide-3-kinase regulatory subunit 1	278.286	0.0663821	0.118192	0.561448	0.574492	0.99969	0.405516	0.969031	271.281	307.856	248.945	285.061
ENSCSAG00000015599	CAMK2B	calcium/calmodulin dependent protein kinase II beta	45.9278	0.0663365	0.105417	0.629485	0.529032	0.99969	0.351021	0.964394	54.0443	45.9617	36.6749	47.0302
ENSCSAG00000003426	MED17	mediator complex subunit 17	94.4071	0.0663189	0.116532	0.568798	0.569493	0.99969	0.399396	0.968571	98.5514	101.463	77.7952	99.8192
ENSCSAG00000004685	FGFR2	fibroblast growth factor receptor 2	30.752	0.0663026	0.0963225	0.689611	0.490439	0.99969	0.306927	0.959486	38.1489	30.352	26.6726	27.8342
ENSCSAG00000018968	TMEM200A	transmembrane protein 200A	105.33	0.0662716	0.113705	0.581952	0.560599	0.99969	0.388584	0.967725	78.4172	145.69	87.7974	109.417
ENSCSAG00000010658	RGS4	regulator of G protein signaling 4	8.39278	0.0662603	0.0611941	1.09967	0.271478	0.99969	0.10327	0.888497	12.7163	9.53921	5.5568	5.7588
ENSCSAG00000007292	GOLGB1	golgin B1	486.505	0.0661977	0.114168	0.57984	0.562023	0.99969	0.390308	0.967863	505.473	502.11	476.773	461.664
ENSCSAG00000014522	PLEKHA6		38.0582	0.0661792	0.101756	0.65088	0.515124	0.99969	0.334891	0.962743	44.5071	39.0241	32.2294	36.4724
ENSCSAG00000003989	NPNT	nephronectin	953.616	0.0661615	0.113593	0.582358	0.560326	0.99969	0.388253	0.967698	939.947	1034.57	823.517	1016.43
ENSCSAG00000000923	ZNF436	zinc finger protein 436	25.2834	0.0661471	0.0904565	0.731055	0.464745	0.99969	0.278768	0.955575	23.3132	33.8208	20.0045	23.995
ENSCSAG00000011744	PMPCB	peptidase, mitochondrial processing subunit beta	132.57	0.0661355	0.118938	0.556113	0.578134	0.99969	0.409992	0.969358	136.7	141.354	132.252	119.975
ENSCSAG00000004231	ARSG	arylsulfatase G	21.4733	0.0661252	0.0856957	0.772028	0.440098	0.99969	0.252709	0.951218	24.3729	25.1488	13.3363	23.0352
ENSCSAG00000008839			23.9229	0.0661012	0.088327	0.750983	0.452663	0.99969	0.265873	0.953521	33.9101	20.8128	18.8931	22.0754
ENSCSAG00000015683	DHRSX		52.2053	0.0660885	0.108159	0.611152	0.541099	0.99969	0.365227	0.965731	50.8652	61.5713	52.2339	44.1508
ENSCSAG00000019712	ZBTB26	zinc finger and BTB domain containing 26	10.4263	0.0660017	0.066801	0.995414	0.319535	0.99969	0.14028	0.915427	11.6566	14.7424	6.66816	8.6382
ENSCSAG00000005849	RBX1	ring-box 1	158.345	0.0659498	0.119212	0.553222	0.580112	0.99969	0.412431	0.969534	156.834	174.307	161.147	141.091
ENSCSAG00000019288	ZBED4	zinc finger BED-type containing 4	41.5614	0.0659215	0.101481	0.649514	0.516006	0.99969	0.335907	0.962851	49.8055	41.6257	27.784	47.0302
ENSCSAG00000001481	GCLM	glutamate-cysteine ligase modifier subunit	118.928	0.0659123	0.118521	0.556261	0.578033	0.99969	0.409868	0.969349	131.402	118.807	112.247	113.256
ENSCSAG00000012936	PANK2		169.475	0.0659048	0.119228	0.552467	0.580629	0.99969	0.413069	0.96958	167.431	187.315	145.588	177.563
ENSCSAG00000002796	VPS9D1	VPS9 domain containing 1	63.3266	0.0659026	0.111849	0.589104	0.555791	0.99969	0.38278	0.967251	68.88	66.7745	53.3453	64.3066
ENSCSAG00000012023	B4GALNT3	beta-1,4-N-acetylgalactosaminyltransferase 3	153.188	0.0659009	0.119153	0.553375	0.580006	0.99969	0.412301	0.969525	172.73	148.291	154.479	137.251
ENSCSAG00000004052	SLC39A8	solute carrier family 39 member 8	276.98	0.0658771	0.117918	0.558654	0.576398	0.99969	0.407856	0.969203	298.833	277.504	252.279	279.302
ENSCSAG00000012385	BCHE	butyrylcholinesterase	16.771	0.065868	0.0796203	0.828742	0.407251	0.99969	0.219515	0.944252	16.9551	22.5472	12.225	15.3568
ENSCSAG00000001675	ZSCAN5A	zinc finger and SCAN domain-containing protein 5A	33.9571	0.0658576	0.0990677	0.66582	0.505526	0.99969	0.323916	0.961529	40.2683	34.6881	31.1181	29.7538
ENSCSAG00000018210	SERPINB8	serpin B8	7.41373	0.0658561	0.0560724	1.19993	0.230166	0.99969	0.0754446	0.853402	13.776	6.93761	2.22272	6.7186
ENSCSAG00000005466		calcium binding and coiled-coil domain 1	116.86	0.0658318	0.118484	0.555727	0.578397	0.99969	0.410317	0.969382	126.103	119.674	112.247	109.417
ENSCSAG00000009351	NOTCH4		10.9998	0.0657996	0.0665246	0.99677	0.318876	0.99969	0.13974	0.915128	15.8954	12.1408	4.44544	11.5176
ENSCSAG00000007037	EZH2		95.5825	0.0657621	0.116875	0.562353	0.573875	0.99969	0.404759	0.968974	95.3723	106.666	83.352	96.9398
ENSCSAG00000019019	HEXIM1	HEXIM P-TEFb complex subunit 1	82.7878	0.0657592	0.114823	0.57337	0.566394	0.99969	0.395618	0.96828	100.671	75.4465	81.1293	73.9046
ENSCSAG00000002022			113.999	0.0657463	0.116626	0.564581	0.572359	0.99969	0.4029	0.968836	138.82	102.33	125.584	89.2614
ENSCSAG00000010080	EIF5	eukaryotic translation initiation factor 5	1110.32	0.0657367	0.111167	0.591277	0.554335	0.99969	0.381028	0.967106	1105.26	1189.8	1000.22	1146
ENSCSAG00000012412	CDC26	cell division cycle 26	59.4243	0.0657269	0.109086	0.603122	0.546427	0.99969	0.371561	0.966296	76.2978	52.0321	48.8998	60.4674
ENSCSAG00000002528	C2CD2L	C2CD2 like	17.4377	0.0657254	0.0811233	0.812934	0.416256	0.99969	0.228435	0.946312	19.0745	21.68	15.559	13.4372
ENSCSAG00000004286	LRFN3	leucine rich repeat and fibronectin type III domain containing 3	19.4193	0.0656904	0.0840418	0.783333	0.433432	0.99969	0.245828	0.94992	23.3132	21.68	14.4477	18.2362
ENSCSAG00000003928	PLA2G12A	phospholipase A2 group XIIA	15.9712	0.0656481	0.0780831	0.844865	0.398186	0.99969	0.210677	0.942049	16.9551	20.8128	15.559	10.5578
ENSCSAG00000012379	WNK3		10.2276	0.065606	0.0652671	1.02033	0.307573	0.99969	0.13062	0.909737	14.8357	11.2736	10.0022	4.799
ENSCSAG00000002019	CLK2		47.2844	0.0654983	0.105669	0.619381	0.535665	0.99969	0.358807	0.965139	49.8055	52.8993	35.5635	50.8694
ENSCSAG00000004285			39.8645	0.0654953	0.100914	0.648487	0.51667	0.99969	0.336671	0.962932	43.4474	44.2273	26.6726	45.1106
ENSCSAG00000017845	NHLRC3	NHL repeat containing 3	25.7296	0.0654946	0.0871933	0.749938	0.453292	0.99969	0.26654	0.953631	23.3132	35.5553	13.3363	30.7136
ENSCSAG00000002770	FANCA		191.473	0.0653998	0.119132	0.549115	0.582927	0.99969	0.415909	0.969781	203.461	195.987	195.599	170.844
ENSCSAG00000007770	UMPS	uridine monophosphate synthetase	73.1621	0.0653715	0.114299	0.572048	0.567289	0.99969	0.396708	0.968365	78.4172	77.1809	68.9043	68.1458
ENSCSAG00000009959	SAFB2	scaffold attachment factor B2	110.515	0.0653556	0.117545	0.556382	0.57795	0.99969	0.409766	0.969342	116.566	116.205	120.027	89.2614
ENSCSAG00000005570	HIF1AN	hypoxia inducible factor 1 subunit alpha inhibitor	23.6065	0.0653437	0.0889046	0.735853	0.46182	0.99969	0.275625	0.955091	28.6117	25.1488	16.6704	23.995
ENSCSAG00000013577			67.043	0.065316	0.110663	0.591419	0.55424	0.99969	0.380914	0.967096	79.4769	64.1729	75.5725	48.9498
ENSCSAG00000001470	EVI5		242.313	0.0653113	0.119202	0.547533	0.584013	0.99969	0.417254	0.969875	221.476	284.442	202.267	261.066
ENSCSAG00000014891	METTL8	methyltransferase like 8	45.7485	0.0652857	0.103009	0.633646	0.526312	0.99969	0.347846	0.964081	55.104	45.0945	30.0067	52.789
ENSCSAG00000014684	WDPCP	WD repeat containing planar cell polarity effector	85.8437	0.0652669	0.114377	0.569887	0.568755	0.99969	0.398495	0.968502	78.4172	104.064	67.7929	93.1006
ENSCSAG00000010990			26.9472	0.0652273	0.0912222	0.717094	0.473316	0.99969	0.288051	0.956945	27.552	32.9536	30.0067	17.2764
ENSCSAG00000006934	TRAPPC12	trafficking protein particle complex 12	125.352	0.0652017	0.118789	0.548923	0.583058	0.99969	0.416072	0.969793	130.342	132.682	122.25	116.136
ENSCSAG00000012311	SEMA3D	semaphorin 3D	27.2926	0.0651365	0.092765	0.701874	0.482758	0.99969	0.298406	0.958377	26.4923	34.6881	21.1158	26.8744
ENSCSAG00000012153	PDHB	pyruvate dehydrogenase E1 subunit beta	191.425	0.0651351	0.11913	0.546892	0.584453	0.99969	0.417799	0.969914	202.401	196.855	195.599	170.844
ENSCSAG00000013432	ZC2HC1A	zinc finger C2HC-type containing 1A	188.499	0.0651297	0.117792	0.552285	0.580753	0.99969	0.413223	0.969591	156.834	240.215	140.031	216.915
ENSCSAG00000017088		VPS33B late endosome and lysosome associated	22.9787	0.0651012	0.0878156	0.744606	0.45651	0.99969	0.269955	0.954191	30.7311	21.68	22.2272	17.2764
ENSCSAG00000001694	CD58	CD58 molecule	83.7518	0.0650861	0.11447	0.56791	0.570096	0.99969	0.400132	0.968627	77.3575	100.595	67.7929	89.2614
ENSCSAG00000006812	C2orf72		6.74403	0.0650662	0.0556682	1.1934	0.232712	0.99969	0.0770478	0.856013	7.41785	11.2736	4.44544	3.8392
ENSCSAG00000001375	SRSF11	serine and arginine rich splicing factor 11	351.276	0.0650643	0.11857	0.548472	0.583368	0.99969	0.416455	0.969819	330.624	400.647	288.953	384.88
ENSCSAG00000006468		eukaryotic translation initiation factor 4E family member 2	100.712	0.0650433	0.117584	0.553132	0.580173	0.99969	0.412507	0.969539	103.85	108.4	95.5769	95.0202
ENSCSAG00000015533	BRF2	BRF2 RNA polymerase III transcription initiation factor subunit	14.082	0.0650379	0.0731039	0.899134	0.368581	0.99969	0.182825	0.933805	21.1938	13.008	14.4477	7.6784
ENSCSAG00000014604	PCIF1	phosphorylated CTD interacting factor 1	77.9763	0.0650233	0.112946	0.575618	0.564873	0.99969	0.393768	0.968136	92.1932	74.5793	57.7907	87.3418
ENSCSAG00000019093	H2AC6	histone H2A type 1-C	513.973	0.0650127	0.115929	0.560946	0.574834	0.99969	0.405935	0.969062	576.473	489.102	533.453	456.865
ENSCSAG00000011442	UBR2	ubiquitin protein ligase E3 component n-recognin 2	194.91	0.0650093	0.119209	0.545067	0.585707	0.99969	0.419354	0.970022	181.207	225.472	180.04	192.92
ENSCSAG00000019660	TRAPPC2B	trafficking protein particle complex 2B	8.29653	0.0649807	0.061116	1.07769	0.281172	0.99969	0.110344	0.894894	10.5969	11.2736	5.5568	5.7588
ENSCSAG00000004858	RUFY3	RUN and FYVE domain containing 3	44.3991	0.064901	0.103969	0.624853	0.532068	0.99969	0.354577	0.964738	56.1637	40.7585	35.5635	45.1106
ENSCSAG00000006481	LCMT1	leucine carboxyl methyltransferase 1	53.2136	0.0648881	0.108832	0.59616	0.551069	0.99969	0.377108	0.966775	58.2831	56.3681	44.4544	53.7488
ENSCSAG00000018043	LIPG	lipase G, endothelial type	20.4393	0.0648591	0.0844196	0.769851	0.441388	0.99969	0.254049	0.951462	26.4923	20.8128	13.3363	21.1156
ENSCSAG00000011737	GNPTG		45.005	0.0648523	0.104173	0.624035	0.532605	0.99969	0.355207	0.964799	57.2234	40.7585	45.5657	36.4724
ENSCSAG00000019293			7.46905	0.0648344	0.0574168	1.15654	0.247462	0.99969	0.0866278	0.869864	11.6566	8.67201	6.66816	2.8794
ENSCSAG00000012128	CEP43	centrosomal protein 43	24.7401	0.0648195	0.0901646	0.720324	0.471326	0.99969	0.285885	0.956633	31.7908	24.2816	18.8931	23.995
ENSCSAG00000013740	RAP1GAP2	RAP1 GTPase activating protein 2	183.283	0.0647576	0.119234	0.54294	0.587171	0.99969	0.421172	0.970147	171.67	210.73	178.929	171.804
ENSCSAG00000007651	STOX1		29.3879	0.0647474	0.0952085	0.680046	0.496475	0.99969	0.313685	0.960324	30.7311	34.6881	23.3386	28.794
ENSCSAG00000006093	TFG	trafficking from ER to golgi regulator	82.2162	0.0647335	0.115218	0.561447	0.574493	0.99969	0.405517	0.969031	81.5963	92.7905	70.0157	84.4624
ENSCSAG00000014220	HYAL1	hyaluronidase 1	398.152	0.0647103	0.115456	0.560458	0.575167	0.99969	0.406344	0.969092	411.161	413.655	386.753	381.041
ENSCSAG00000008981	PSMD10	proteasome 26S subunit, non-ATPase 10	40.813	0.0646938	0.101642	0.637517	0.523788	0.99969	0.344909	0.963786	54.0443	35.5553	33.3408	40.3116
ENSCSAG00000012603	BBOF1	basal body orientation factor 1	13.0956	0.0646926	0.070236	0.923413	0.355792	0.99969	0.171287	0.92966	10.5969	21.68	6.66816	13.4372
ENSCSAG00000018811	H1-10	H1 histone family member X	102.542	0.0646848	0.113859	0.56931	0.569146	0.99969	0.398972	0.968539	137.76	80.6497	111.136	80.6232
ENSCSAG00000011618	FRMD4B	FERM domain containing 4B	552.618	0.0646832	0.114917	0.56277	0.573591	0.99969	0.404411	0.968949	520.309	623.518	530.119	536.528
ENSCSAG00000010564	SH3GL1		69.8986	0.064655	0.11368	0.568823	0.569476	0.99969	0.399376	0.968569	74.1785	74.5793	65.5702	65.2664
ENSCSAG00000014465	PEX13	peroxisomal biogenesis factor 13	141.148	0.0646443	0.118515	0.544964	0.585778	0.99969	0.419442	0.970028	133.521	163.034	114.47	153.568
ENSCSAG00000007569	ARL2	ADP ribosylation factor like GTPase 2	47.9103	0.0646213	0.105372	0.614386	0.53896	0.99969	0.362696	0.9655	62.5218	41.6257	43.343	44.1508
ENSCSAG00000013282	NUDT5		72.8633	0.0645823	0.113713	0.568468	0.569717	0.99969	0.399669	0.968592	85.8351	69.3761	70.0157	66.2262
ENSCSAG00000012163		RNA polymerase II, I and III subunit K	473.88	0.0645756	0.114604	0.563444	0.573133	0.99969	0.403848	0.968907	499.115	482.164	440.098	474.141
ENSCSAG00000013716	CTNNBL1	catenin beta like 1	155.146	0.0645445	0.119225	0.541357	0.588261	0.99969	0.422526	0.97024	156.834	167.37	153.368	143.01
ENSCSAG00000007744	ITPKA		11.732	0.0645421	0.0692364	0.942691	0.345839	0.99969	0.162522	0.926146	16.9551	12.1408	11.1136	6.7186
ENSCSAG00000014396		zinc finger CCCH-type containing 11A	446.743	0.0645269	0.116948	0.55159	0.581229	0.99969	0.413811	0.969632	439.772	487.367	378.974	480.86
ENSCSAG00000012773	PSEN1	presenilin 1	50.8889	0.0645204	0.10826	0.596253	0.551006	0.99969	0.377033	0.966769	54.0443	55.5009	48.8998	45.1106
ENSCSAG00000007798	VPS26A	VPS26, retromer complex component A	275.984	0.0644684	0.11884	0.542266	0.587635	0.99969	0.421748	0.970187	282.938	292.247	224.495	304.257
ENSCSAG00000005187	KAT7	lysine acetyltransferase 7	96.5339	0.0644236	0.116932	0.550622	0.581893	0.99969	0.414631	0.969691	95.3723	108.4	84.4633	97.8996
ENSCSAG00000012281	CBFA2T2	CBFA2/RUNX1 partner transcriptional co-repressor 2	88.1646	0.0643599	0.113682	0.565459	0.571762	0.99969	0.402169	0.968781	89.0141	98.8609	61.1248	103.658
ENSCSAG00000017230	CRACDL		59.2721	0.064269	0.108975	0.591009	0.554514	0.99969	0.381243	0.967124	70.9994	56.3681	65.5702	44.1508
ENSCSAG00000011725	PSMC2	proteasome 26S subunit, ATPase 2	102.488	0.0642628	0.117625	0.54635	0.584825	0.99969	0.418261	0.969946	103.85	111.869	101.134	93.1006
ENSCSAG00000007341	MAP4K2		83.2405	0.0642505	0.115769	0.5552	0.578758	0.99969	0.410762	0.969414	92.1932	84.1185	78.9065	77.7438
ENSCSAG00000011406	ZNF462	zinc finger protein 462	150.653	0.0642285	0.118653	0.540894	0.588581	0.99969	0.422924	0.970267	129.282	186.448	140.031	146.849
ENSCSAG00000007218	NQO2	N-ribosyldihydronicotinamide:quinone reductase 2	96.9255	0.06416	0.117055	0.548308	0.58348	0.99969	0.416594	0.969829	110.208	94.5249	88.9088	94.0604
ENSCSAG00000011532	ZNF133	zinc finger protein 133	22.7245	0.0641467	0.087752	0.731845	0.464263	0.99969	0.278249	0.955496	21.1938	30.352	21.1158	18.2362
ENSCSAG00000007971	OSTF1	osteoclast stimulating factor 1	66.5224	0.064143	0.112648	0.569893	0.56875	0.99969	0.398489	0.968502	74.1785	67.6417	66.6816	57.588
ENSCSAG00000015685	ZNF703	zinc finger protein 703	4.71734	0.0640929	0.0454384	1.47922	0.139081	0.99969	0.0284132	0.686754	6.35815	8.67201	0	3.8392
ENSCSAG00000016674	UCKL1	uridine-cytidine kinase 1 like 1	103.645	0.064075	0.117781	0.543947	0.586478	0.99969	0.42031	0.970088	108.089	110.135	95.5769	100.779
ENSCSAG00000007380	MEN1	menin 1	231.541	0.064069	0.119234	0.537735	0.59076	0.99969	0.425637	0.970451	280.818	202.925	238.942	203.478
ENSCSAG00000013892	BBS4		16.3176	0.0639867	0.0792881	0.810745	0.417512	0.99969	0.229691	0.94659	20.1342	18.2112	14.4477	12.4774
ENSCSAG00000003342	ZNF224		76.0474	0.0639501	0.114259	0.559324	0.575941	0.99969	0.407294	0.969162	72.0591	89.3217	68.9043	73.9046
ENSCSAG00000006902	OTUB1		195.1	0.0639433	0.119187	0.53663	0.591524	0.99969	0.42659	0.970515	223.595	183.847	180.04	192.92
ENSCSAG00000002901	LAYN	layilin	56.2192	0.0639363	0.105096	0.61041	0.541591	0.99969	0.36581	0.965784	74.1785	47.6961	65.5702	37.4322
ENSCSAG00000001804			39.7244	0.0638944	0.102636	0.623425	0.533006	0.99969	0.355678	0.964844	47.6861	39.0241	36.6749	35.5126
ENSCSAG00000008287	DPP3		32.1475	0.0638759	0.0965523	0.6635	0.50701	0.99969	0.325605	0.961721	38.1489	32.9536	34.4521	23.0352
ENSCSAG00000015349	KLHL28	kelch like family member 28	80.2605	0.0638471	0.113293	0.562964	0.573459	0.99969	0.404249	0.968936	82.656	88.4545	57.7907	92.1408
ENSCSAG00000012203	PWWP3A	PWWP domain containing 3A, DNA repair factor	153.48	0.0637865	0.119183	0.535427	0.592354	0.99969	0.427626	0.970585	167.431	153.495	156.702	136.292
ENSCSAG00000011098	STX17	syntaxin 17	50.4195	0.0637749	0.106674	0.598744	0.549344	0.99969	0.375043	0.966598	54.0443	54.6337	55.568	37.4322
ENSCSAG00000002116	HEXD	hexosaminidase D	19.9897	0.06369	0.0850789	0.750716	0.452823	0.99969	0.266043	0.953549	23.3132	22.5472	17.7818	16.3166
ENSCSAG00000001974	ZNF808		16.6812	0.0636736	0.0779358	0.819173	0.412687	0.99969	0.224884	0.945511	22.2535	17.344	8.89088	18.2362
ENSCSAG00000000609		60S ribosomal protein L37a-like	203.712	0.063654	0.119216	0.53427	0.593155	0.99969	0.428626	0.970651	235.252	189.917	211.158	178.523
ENSCSAG00000001187	KDM4A		257.569	0.0634898	0.118413	0.536309	0.591745	0.99969	0.426866	0.970534	290.356	245.418	247.833	246.669
ENSCSAG00000001294	YIPF1	Yip1 domain family member 1	43.6055	0.0634745	0.104694	0.606315	0.544306	0.99969	0.369035	0.966073	48.7458	45.9617	35.5635	44.1508
ENSCSAG00000002987	KRT15	keratin 15	14.0844	0.0634646	0.0742048	0.859754	0.389925	0.99969	0.202747	0.939919	20.1342	13.8752	8.89088	13.4372
ENSCSAG00000007912	CMAS	cytidine monophosphate N-acetylneuraminic acid synthetase	207.962	0.0634471	0.118877	0.53371	0.593542	0.99969	0.42911	0.970683	221.476	211.597	193.377	205.397
ENSCSAG00000018742		small nuclear ribonucleoprotein E	75.9975	0.0634127	0.11221	0.564451	0.572447	0.99969	0.403009	0.968844	77.3575	84.9857	53.3453	88.3016
ENSCSAG00000019595	FIGNL1	fidgetin like 1	53.1931	0.0634032	0.109065	0.581263	0.561063	0.99969	0.389146	0.96777	56.1637	58.1025	46.6771	51.8292
ENSCSAG00000019524			9.29605	0.0633583	0.0640588	0.999409	0.317597	0.99969	0.138695	0.914543	11.6566	12.1408	6.66816	6.7186
ENSCSAG00000018270	KLHL13	kelch like family member 13	35.7157	0.0633568	0.0965778	0.654708	0.512656	0.99969	0.332057	0.962437	28.6117	50.2977	25.5613	38.392
ENSCSAG00000007495	TMEM170B	transmembrane protein 170B	14.631	0.0633361	0.0760019	0.836302	0.402985	0.99969	0.215338	0.943232	14.8357	19.9456	12.225	11.5176
ENSCSAG00000019619	ZNF526	zinc finger protein 526	17.8322	0.0633266	0.0815685	0.779349	0.435774	0.99969	0.248238	0.950382	23.3132	18.2112	14.4477	15.3568
ENSCSAG00000002549			475.675	0.063283	0.11679	0.542032	0.587796	0.99969	0.421949	0.970201	540.443	445.741	499	417.513
ENSCSAG00000004361	WDFY3		320.451	0.0632712	0.118255	0.534801	0.592788	0.99969	0.428167	0.970621	298.833	366.826	281.174	334.97
ENSCSAG00000019131	GPR85	G protein-coupled receptor 85	14.6276	0.0632488	0.0741688	0.854212	0.392988	0.99969	0.205673	0.940723	11.6566	23.4144	10.0022	13.4372
ENSCSAG00000004729	MRPS7	mitochondrial ribosomal protein S7	143.238	0.0632307	0.118727	0.532948	0.594069	0.99969	0.429769	0.970727	157.894	142.221	156.702	116.136
ENSCSAG00000019491	FAM200A	family with sequence similarity 200 member A	16.3455	0.0630276	0.0740079	0.851932	0.394252	0.99969	0.206886	0.94105	10.5969	28.6176	8.89088	17.2764
ENSCSAG00000015273	MID1	midline 1	183.958	0.0630218	0.119122	0.528674	0.597032	0.99969	0.433477	0.97097	181.207	203.792	144.477	206.357
[truncated: 10,472 more rows]

## Sheet: TE_up
No genes had significantly higher TE in KO2 than WT with log2FC threshold of 0.75

## Sheet: TE_down
No genes had significantly lower TE in KO2 than WT with log2FC threshold of 0.75

## Sheet: TE_full
gene_ID	external_gene_name	wikigene_description	log2FC_TE_final	pvalue_final	pvalue.adjust	log2FC_TE_v1	pvalue_v1	KO2_log2TE	WT_log2TE	log2FC_TE_v2	pvalue_v2	noCHX_Ribo_12hpi_KO2_1	noCHX_Ribo_12hpi_KO2_2	noCHX_Ribo_12hpi_WT_1	noCHX_Ribo_12hpi_WT_2	noCHX_RNA_12hpi_KO2_1	noCHX_RNA_12hpi_KO2_2	noCHX_RNA_12hpi_WT_1	noCHX_RNA_12hpi_WT_2
ENSCSAG00000008860	SLC11A1		6.56954	0.00171011	0.999983	6.63033	0.00149593	6.08641	-0.485422	6.56954	0.00171011	1.92008	2.982	3.25277	2.36685	0	0	4.32527	2.9225
ENSCSAG00000006819	BAIAP2L2		6.5644	0.042408	0.999983	6.61747	0.0358446	5.34945	-1.80734	6.5644	0.042408	0.640028	1.988	1.95166	0	0	0	3.24395	3.89666
ENSCSAG00000013786	COL9A1	collagen type IX alpha 1 chain	6.21876	0.0327829	0.999983	6.24943	0.0327114	5.76447	-0.999991	6.21876	0.0327829	2.56011	0.993999	0	2.36685	0	0	2.16263	1.94833
ENSCSAG00000012293	BPIFB1		5.75788	0.0681932	0.999983	5.82432	0.0627151	5.34944	-0.999991	5.75788	0.0681932	0.640028	1.988	1.95166	0	0	0	2.16263	1.94833
ENSCSAG00000004389	SOX9	SRY-box transcription factor 9	5.43838	0.0009297	0.999983	5.51242	0.000743514	6.08642	0.584964	5.43838	0.0009297	3.84017	0.993999	6.50555	4.73369	0	0	4.32527	3.89666
ENSCSAG00000006460	COL2A1	collagen type II alpha 1 chain	5.34531	0.0411717	0.999983	5.34531	0.0411717	2.6147	-3.70042	5.58778	0.039058	2.56011	45.724	1.30111	0	4.16898	3.55656	9.73185	2.9225
ENSCSAG00000018540			4.83919	0.0170248	0.999983	4.94866	0.0106156	5.34945	0.415039	4.83919	0.0170248	1.92008	0.993999	3.25277	4.73369	0	0	4.32527	1.94833
ENSCSAG00000012625	ADGRF1		4.24352	0.138418	0.999983	4.24352	0.138418	2.58494	-6.34949	4.34747	0.13419	0.640028	4.97	0	0	0	0.88914	2.16263	3.89666
ENSCSAG00000005790	PYROXD2	pyridine nucleotide-disulphide oxidoreductase domain 2	3.78367	0.00130902	0.999983	3.78367	0.00130902	2.45943	-1.2801	3.78709	0.00110377	10.8805	10.934	5.20444	2.36685	2.08449	1.77828	10.8132	5.845
ENSCSAG00000001333			3.71683	0.0280026	0.999983	3.71683	0.0280026	3.16991	-0.485423	3.70426	0.0221785	4.4802	4.97	2.60222	2.36685	0	0.88914	2.16263	4.87083
ENSCSAG00000010995	RAB26	RAB26, member RAS oncogene family	3.42329	0.0556671	0.999983	3.39979	0.0514175	1.58496	-1.73696	3.42329	0.0556671	3.20014	5.964	1.30111	2.36685	2.08449	0.88914	3.24395	6.81916
ENSCSAG00000004820	ENO4		3.41628	0.1037	0.999983	3.41628	0.1037	2.58495	-0.73696	3.40607	0.0963837	4.4802	1.988	0.650555	2.36685	1.04225	0	4.32527	0.974166
ENSCSAG00000005973	SLC43A1		3.21457	0.0159018	0.999983	3.21457	0.0159018	3.32191	0.125533	3.18747	0.0137831	2.56011	6.958	6.50555	4.73369	1.04225	0	7.56922	2.9225
ENSCSAG00000001541	ELAPOR1		3.12455	0.0268506	0.999983	3.14926	0.0244738	2.99999	-0.137501	3.12455	0.0268506	2.56011	4.97	4.55388	4.73369	1.04225	0	5.40658	5.845
ENSCSAG00000018328	TENM1		3.05391	0.105906	0.999983	3.38366	0.0965579	1.87446	-1.99999	3.05391	0.105906	2.56011	7.952	0.650555	0	1.04225	1.77828	4.32527	0
ENSCSAG00000014150		MAPK activated protein kinase 3	3.03751	0.091471	0.999983	3.00077	0.0705203	0.847996	-2.45943	3.03751	0.091471	5.12023	3.976	3.90333	0	1.04225	3.55656	10.8132	10.7158
ENSCSAG00000011503			2.95788	0.339156	0.999983	2.95788	0.339156	2.32191	-5.3495	3.07923	0.306791	2.56011	1.988	0	0	0	0.88914	2.16263	0.974166
ENSCSAG00000017066	ERICH1	glutamate rich 1	2.92794	0.126466	0.999983	2.92794	0.126466	3.16991	2.56947e-06	2.93613	0.102801	7.04031	1.988	4.55388	0	1.04225	0	1.08132	3.89666
ENSCSAG00000012249	FBXL16	F-box and leucine rich repeat protein 16	2.88045	0.101124	0.999983	2.76157	0.0966819	0.241009	-3.45942	2.88045	0.101124	4.4802	8.94599	1.30111	0	6.25347	5.33484	5.40658	5.845
ENSCSAG00000005961	MCHR1	melanin concentrating hormone receptor 1	2.84544	0.182398	0.999983	2.84544	0.182398	2.80734	-0.415033	2.87239	0.156365	3.84017	2.982	2.60222	0	1.04225	0	3.24395	0.974166
ENSCSAG00000016759	TMEM267	transmembrane protein 267	2.83461	0.124593	0.999983	2.77799	0.111833	1.16992	-1.99999	2.83461	0.124593	4.4802	4.97	2.60222	0	2.08449	1.77828	5.40658	6.81916
ENSCSAG00000010499	NEK11	NIMA related kinase 11	2.82905	0.141047	0.999983	2.72102	0.135793	0.321929	-3.32191	2.82905	0.141047	5.12023	4.97	1.30111	0	4.16898	4.4457	3.24395	6.81916
ENSCSAG00000013360	LHX6		2.79339	0.188605	0.999983	2.79138	0.17486	1.58496	-1.58495	2.79339	0.188605	3.20014	2.982	3.25277	0	0	1.77828	1.08132	7.79333
ENSCSAG00000006997			2.79288	0.081457	0.999983	2.79288	0.081457	1	-2.32192	2.86294	0.0811492	4.4802	9.93999	1.95166	0	3.12674	4.4457	4.32527	5.845
ENSCSAG00000019131	GPR85	G protein-coupled receptor 85	2.76565	0.0824782	0.999983	2.62956	0.0681545	-0.866732	-4.45942	2.76565	0.0824782	5.12023	11.928	1.30111	0	10.4225	21.3394	9.73185	11.69
ENSCSAG00000010803	FRMPD1	FERM and PDZ domain containing 1	2.76315	0.248541	0.999983	2.65727	0.245663	0.584962	-2.99998	2.76315	0.248541	4.4802	1.988	0.650555	0	3.12674	0.88914	2.16263	5.845
ENSCSAG00000009245	MRGPRF	MAS related GPR family member F	2.74778	0.260764	0.999983	2.62392	0.253021	1.29552e-06	-3.58494	2.74778	0.260764	0.640028	4.97	0.650555	0	3.12674	2.66742	5.40658	6.81916
ENSCSAG00000009958	KCNIP1	potassium voltage-gated channel interacting protein 1	2.74524	0.177361	0.999983	2.66777	0.16017	0.415038	-2.80735	2.74524	0.177361	1.92008	5.964	0	2.36685	2.08449	4.4457	9.73185	3.89666
ENSCSAG00000014395		BAF chromatin remodeling complex subunit BCL11A	2.70516	0.292559	0.999983	2.58177	0.281055	-0.263032	-3.80734	2.70516	0.292559	2.56011	1.988	0.650555	0	2.08449	4.4457	5.40658	8.76749
ENSCSAG00000004166	ZNF875		2.69815	0.268703	0.999983	2.69815	0.268703	1.58496	-1.99999	2.74785	0.248538	1.92008	3.976	0.650555	0	2.08449	0	1.08132	2.9225
ENSCSAG00000017191	PDZD2	PDZ domain containing 2	2.6537	0.355246	0.999983	2.6537	0.355246	1.99998	-1.58495	2.70659	0.335456	1.92008	1.988	0.650555	0	0	0.88914	2.16263	0.974166
ENSCSAG00000018715		NADH dehydrogenase [ubiquinone] 1 beta subcomplex subunit 4-like	2.6426	0.165539	0.999983	2.6426	0.165539	3.32191	0.736964	2.63103	0.0858798	3.84017	5.964	3.25277	2.36685	0	0.88914	2.16263	0.974166
ENSCSAG00000007506	LYRM1	LYR motif containing 1	2.63945	0.0784925	0.999983	2.60171	0.0656353	1	-1.84799	2.63945	0.0784925	7.68034	5.964	5.20444	0	3.12674	3.55656	6.4879	11.69
ENSCSAG00000018504			2.61975	0.271419	0.999983	2.47406	0.25449	-0.874466	-4.32191	2.61975	0.271419	4.4802	1.988	1.30111	0	6.25347	5.33484	11.8945	7.79333
ENSCSAG00000007181	CATSPERZ	catsper channel auxiliary subunit zeta	2.60788	0.105045	0.999983	2.60788	0.105045	1.58496	-0.777597	2.39604	0.0789877	5.76025	5.964	4.55388	2.36685	1.04225	2.66742	11.8945	0
ENSCSAG00000006096	QPRT	quinolinate phosphoribosyltransferase	2.60307	0.222454	0.999983	2.60307	0.222454	1.80735	-1.32192	2.64102	0.207729	3.20014	3.976	1.95166	0	1.04225	0.88914	4.32527	0.974166
ENSCSAG00000015353	F2RL2	coagulation factor II thrombin receptor like 2	2.59101	0.304033	0.999983	3.07953	0.202261	1.58494	-0.999982	2.59101	0.304033	0.640028	1.988	1.30111	2.36685	0	0.88914	0	5.845
ENSCSAG00000010094	CNBD2	cyclic nucleotide binding domain containing 2	2.58527	0.124453	0.999983	2.56733	0.101395	0.736965	-2.07038	2.58527	0.124453	5.76025	3.976	5.20444	0	6.25347	0	9.73185	10.7158
ENSCSAG00000017193	AFF3		2.57697	0.122496	0.999983	2.60371	0.12	2.58495	2.526e-06	2.57697	0.122496	3.20014	2.982	1.95166	4.73369	0	0.88914	3.24395	3.89666
ENSCSAG00000019210	CHRM4	cholinergic receptor muscarinic 4	2.56375	0.242493	0.999983	2.56375	0.242493	1.87446	-5.34951	2.64952	0.179742	5.76025	4.97	0	0	1.04225	1.77828	2.16263	0.974166
ENSCSAG00000009943	TSPAN33		2.55818	0.136319	0.999983	2.41837	0.135333	-0.0874613	-7.22397	2.55818	0.136319	3.84017	11.928	0	0	7.29572	9.78054	7.56922	2.9225
ENSCSAG00000000835	AGMAT	agmatinase	2.54396	0.181477	0.999983	2.49979	0.179722	1.22239	-1.22239	2.54396	0.181477	2.56011	3.976	1.30111	2.36685	1.04225	1.77828	4.32527	2.9225
ENSCSAG00000016552	LGI3		2.53865	0.144294	0.999983	2.53865	0.144294	0.874469	-2.16992	2.5838	0.141993	5.76025	4.97	1.95166	0	1.04225	5.33484	7.56922	0.974166
ENSCSAG00000001629	ZNF550		2.51212	0.177717	0.999983	2.51212	0.177717	1.41503	-0.999995	2.52112	0.165372	3.84017	3.976	0.650555	2.36685	0	2.66742	2.16263	3.89666
ENSCSAG00000003874	MAP3K3	mitogen-activated protein kinase kinase kinase 3	2.49672	0.0412712	0.999983	2.42546	0.0253525	-1.37439	-4.19639	2.49672	0.0412712	10.8805	15.904	3.25277	0	31.2674	39.1221	31.3582	24.3542
ENSCSAG00000005259		erb-b2 receptor tyrosine kinase 3	2.48174	0.188076	0.999983	2.48174	0.188076	1.37851	-1.99999	2.56116	0.139477	5.12023	7.952	0.650555	0	3.12674	1.77828	3.24395	0.974166
ENSCSAG00000002763			2.46274	0.287104	0.999983	2.47691	0.285245	1.99998	-0.415033	2.46274	0.287104	2.56011	0.993999	0.650555	2.36685	0	0.88914	2.16263	1.94833
ENSCSAG00000017964	MTUS2	microtubule associated scaffold protein 2	2.45946	0.167008	0.999983	2.46887	0.140219	1.58496	-0.874465	2.45946	0.167008	1.92008	3.976	1.30111	4.73369	1.04225	0.88914	5.40658	5.845
ENSCSAG00000007173	MAMLD1		2.45593	0.100579	0.999983	2.42388	0.0866699	0.736966	-1.92599	2.45593	0.100579	4.4802	10.934	5.20444	0	1.04225	8.00226	7.56922	10.7158
ENSCSAG00000010451	KRBA2	KRAB-A domain containing 2	2.45161	0.280943	0.999983	2.45161	0.280943	0.584962	-2.80734	2.55766	0.277808	3.20014	2.982	0.650555	0	2.08449	1.77828	3.24395	3.89666
ENSCSAG00000007652	ZNF846	zinc finger protein 846	2.44701	0.153629	0.999983	2.40736	0.126557	0.321929	-2.39231	2.44701	0.153629	6.40028	3.976	3.90333	0	4.16898	3.55656	8.65053	11.69
ENSCSAG00000012914	RNF24	ring finger protein 24	2.44181	0.0904184	0.999983	2.44181	0.0904184	3.90687	1.48543	2.42559	0.0255856	5.76025	8.94599	6.50555	7.10054	1.04225	0	2.16263	2.9225
ENSCSAG00000009927			2.43035	0.00334095	0.999983	2.43035	0.00334095	2.27799	-0.137499	2.41744	3.95931e-05	46.7221	49.7	55.9477	14.2011	13.5492	6.22398	67.0416	9.74166
ENSCSAG00000015294	INHBA	inhibin subunit beta A	2.42833	0.0147504	0.999983	2.42833	0.0147504	4.45941	2.03242	2.41535	0.00121836	12.8006	8.94599	18.8661	26.0353	1.04225	0	5.40658	5.845
ENSCSAG00000018388	PRKAB2	protein kinase AMP-activated non-catalytic subunit beta 2	2.4265	0.00378832	0.999983	2.4265	0.00378832	2.078	-0.337033	2.42846	0.00221323	20.4809	17.892	11.71	7.10054	5.21123	4.4457	15.1384	8.76749
ENSCSAG00000004277			2.40348	0.337264	0.999983	2.40348	0.337264	0.736964	-2.58495	2.48356	0.331566	2.56011	1.988	0.650555	0	0	2.66742	4.32527	1.94833
ENSCSAG00000007413	BMP6		2.35879	0.370103	0.999983	2.35879	0.370103	1.58495	-0.73696	2.78432	0.298152	3.20014	0	0.650555	2.36685	0	0.88914	4.32527	0.974166
ENSCSAG00000019103	KAAG1		2.35427	0.391774	0.999983	2.35427	0.391774	1.17748e-06	-3.32191	2.44557	0.388157	2.56011	0.993999	0.650555	0	2.08449	1.77828	7.56922	1.94833
ENSCSAG00000000614	FAM181B	family with sequence similarity 181 member B	2.35068	0.275485	0.999983	2.35068	0.275485	0.485427	-2.80734	2.46927	0.26902	5.12023	1.988	1.30111	0	3.12674	1.77828	3.24395	3.89666
ENSCSAG00000013771	MNT	MAX network transcriptional repressor	2.34471	0.0203626	0.999983	2.34471	0.0203626	4.45942	2.11548	2.34593	0.000314307	24.9611	18.886	20.1672	18.9348	1.04225	0.88914	3.24395	5.845
ENSCSAG00000006972	SGMS1	sphingomyelin synthase 1	2.33563	0.0417687	0.999983	2.28979	0.0285533	-0.389945	-2.926	2.33563	0.0417687	15.3607	13.916	5.20444	0	20.8449	16.8937	12.9758	25.3283
ENSCSAG00000005421			2.33168	0.0229205	0.999983	2.33168	0.0229205	2.19264	-0.115475	2.33383	0.00951464	15.3607	16.898	7.1561	4.73369	3.12674	4.4457	9.73185	2.9225
ENSCSAG00000014744	PRDM1	PR/SET domain 1	2.32383	0.423401	0.999983	2.33643	0.41234	1.58495	-1.32192	2.32383	0.423401	0.640028	1.988	0	2.36685	0	0.88914	1.08132	3.89666
ENSCSAG00000014971	SPACA9	sperm acrosome associated 9	2.32159	0.00317424	0.999983	2.30988	0.00234162	0.747234	-1.5502	2.32159	0.00317424	24.9611	21.868	9.10777	4.73369	13.5492	14.2262	18.3824	23.38
ENSCSAG00000010131	CNTFR	ciliary neurotrophic factor receptor	2.32008	0.271133	0.999983	2.36139	0.255704	1.99999	-0.321924	2.32008	0.271133	1.92008	1.988	1.95166	2.36685	0	0.88914	3.24395	1.94833
ENSCSAG00000017045	CAPSL	calcyphosine like	2.31853	0.232715	0.999983	2.31853	0.232715	2.99998	0.736964	2.29849	0.157473	4.4802	3.976	2.60222	2.36685	1.04225	0	2.16263	0.974166
ENSCSAG00000013237	LCTL		2.31659	0.353733	0.999983	2.3589	0.322685	1.58495	-0.73696	2.31659	0.353733	1.92008	0.993999	0.650555	2.36685	1.04225	0	3.24395	1.94833
ENSCSAG00000006501	EN2		2.3087	0.288331	0.999983	2.3087	0.288331	2.80734	0.58496	2.35237	0.157297	1.28006	12.922	1.30111	2.36685	2.08449	0	1.08132	0.974166
ENSCSAG00000004001	PECAM1	platelet and endothelial cell adhesion molecule 1	2.30063	0.269588	0.999983	2.16847	0.261796	-0.459429	-3.58495	2.30063	0.269588	2.56011	4.97	0.650555	0	6.25347	5.33484	6.4879	5.845
ENSCSAG00000012626	KCNG3	potassium voltage-gated channel modifier subfamily G member 3	2.28047	0.161057	0.999983	2.22642	0.154972	0.289508	-1.87446	2.28047	0.161057	5.12023	5.964	1.30111	2.36685	3.12674	6.22398	8.65053	1.94833
ENSCSAG00000007669	NATD1	N-acetyltransferase domain containing 1	2.25494	0.0264604	0.999983	2.25494	0.0264604	2.52356	0.280109	2.25243	0.0142202	12.1605	10.934	7.80666	9.46738	2.08449	1.77828	5.40658	8.76749
ENSCSAG00000011509	FOXN3		2.25232	0.0758525	0.999983	2.20594	0.0567653	-0.353636	-2.53605	2.25232	0.0758525	7.04031	10.934	2.60222	2.36685	6.25347	16.8937	14.0571	14.6125
ENSCSAG00000014360	CREB5	cAMP responsive element binding protein 5	2.23868	0.0334805	0.999983	2.23868	0.0334805	3.05889	0.823123	2.23769	0.0145901	5.12023	19.88	11.0594	11.8342	3.12674	0	7.56922	4.87083
ENSCSAG00000006990	IGSF11	immunoglobulin superfamily member 11	2.23055	0.16454	0.999983	2.23055	0.16454	2.80734	0.584964	2.20677	0.145669	4.4802	2.982	1.95166	7.10054	1.04225	0	3.24395	2.9225
ENSCSAG00000016823	NSMF	NMDA receptor synaptonuclear signaling and neuronal migration factor	2.22713	0.0839536	0.999983	2.14187	0.0495463	-3.2115	-5.34872	2.22713	0.0839536	8.32037	10.934	1.95166	2.36685	101.098	74.6877	85.424	77.9333
ENSCSAG00000018648	B3GALT1	beta-1,3-galactosyltransferase 1	2.20209	0.131913	0.999983	2.15054	0.126093	0.530515	-1.58496	2.20209	0.131913	5.12023	7.952	1.95166	2.36685	4.16898	5.33484	5.40658	6.81916
ENSCSAG00000012152	GPR158		2.20095	0.498419	0.999983	2.20095	0.498419	1.58495	-1.58495	2.27603	0.478394	1.28006	1.988	1.30111	0	1.04225	0	1.08132	1.94833
ENSCSAG00000008367	MUC22		2.19626	0.261987	0.999983	2.19626	0.261987	2.16992	-0.415034	2.24073	0.217476	3.84017	4.97	3.25277	0	1.04225	0.88914	1.08132	2.9225
ENSCSAG00000011954	ONECUT3		2.19097	0.072278	0.999983	2.19097	0.072278	1.58496	-0.58496	2.18741	0.0714738	7.04031	7.952	7.80666	2.36685	4.16898	0.88914	11.8945	2.9225
ENSCSAG00000017421	TPPP	tubulin polymerization promoting protein	2.17991	0.175695	0.999983	2.14853	0.165752	1.1375	-1.26303	2.17991	0.175695	5.76025	4.97	4.55388	0	1.04225	3.55656	6.4879	5.845
ENSCSAG00000004681	ARNTL	aryl hydrocarbon receptor nuclear translocator like	2.17863	0.121143	0.999983	2.14725	0.108215	0.530515	-1.58496	2.17863	0.121143	8.32037	4.97	2.60222	2.36685	3.12674	6.22398	7.56922	6.81916
ENSCSAG00000000644	PNRC2	proline rich nuclear receptor coactivator 2	2.17755	0.160597	0.999983	2.09429	0.13078	-1.20645	-3.27301	2.17755	0.160597	8.9604	3.976	1.30111	2.36685	10.4225	20.4502	8.65053	20.4575
ENSCSAG00000001302	CDCP2		2.17495	0.29623	0.999983	2.10624	0.290843	0.485427	-2.16992	2.17495	0.29623	3.20014	3.976	1.95166	0	1.04225	4.4457	5.40658	3.89666
ENSCSAG00000006844	AOC1	amine oxidase copper containing 1	2.1698	0.330962	0.999983	2.55881	0.233606	1.99997	-0.485412	2.1698	0.330962	2.56011	0.993999	4.55388	0	0	0.88914	0	6.81916
ENSCSAG00000014474	MARCHF3	membrane associated ring-CH-type finger 3	2.16891	0.205028	0.999983	2.16891	0.205028	1.1375	-1.41503	2.21881	0.197207	7.68034	2.982	3.25277	0	1.04225	3.55656	5.40658	2.9225
ENSCSAG00000010027	ZNF597	zinc finger protein 597	2.15875	0.377575	0.999983	2.15875	0.377575	0.321928	-2.80734	2.28635	0.368295	2.56011	1.988	1.30111	0	2.08449	1.77828	4.32527	2.9225
ENSCSAG00000009730	TMEM179		2.15552	0.0803673	0.999983	2.15552	0.0803673	1.848	-0.289504	2.16573	0.0647156	7.04031	10.934	6.50555	2.36685	1.04225	3.55656	6.4879	4.87083
ENSCSAG00000018924	LRRC3B	leucine rich repeat containing 3B	2.14557	0.449792	0.999983	2.40564	0.392114	0.999994	-1.99998	2.14557	0.449792	1.28006	2.982	1.30111	0	1.04225	0.88914	0	3.89666
ENSCSAG00000003864	KCNH6	potassium voltage-gated channel subfamily H member 6	2.13787	0.0857042	0.999983	2.08401	0.0826025	0.144391	-1.90689	2.13787	0.0857042	8.9604	11.928	1.95166	2.36685	10.4225	8.8914	6.4879	8.76749
ENSCSAG00000014319	RFLNB	refilin B	2.13617	0.328719	0.999983	1.97803	0.311509	-1.89308	-4.85796	2.13617	0.328719	3.84017	2.982	1.30111	0	13.5492	12.448	15.1384	13.6383
ENSCSAG00000003861	MYO7A		2.12533	0.313098	0.999983	2.129	0.312551	1.32192	-0.73696	2.12533	0.313098	2.56011	1.988	1.30111	2.36685	0	1.77828	1.08132	3.89666
ENSCSAG00000014906	NTNG2		2.11726	0.246788	0.999983	1.95509	0.230618	-1.24101	-4.16991	2.11726	0.246788	5.76025	4.97	0.650555	0	10.4225	16.0045	9.73185	7.79333
ENSCSAG00000011426	EME2	essential meiotic structure-specific endonuclease subunit 2	2.11357	0.402475	0.999983	2.11357	0.402475	0.736964	-2.32191	2.22237	0.382399	2.56011	1.988	0.650555	0	1.04225	1.77828	3.24395	1.94833
ENSCSAG00000000157			2.10895	0.426588	0.999983	2.10895	0.426588	-1.99999	-5.08744	2.22041	0.425911	1.92008	1.988	1.30111	0	7.29572	8.8914	18.3824	15.5867
ENSCSAG00000005828	PPM1E		2.10428	0.273591	0.999983	2.07878	0.262396	1.22239	-1.16992	2.10428	0.273591	4.4802	2.982	3.90333	0	1.04225	1.77828	6.4879	2.9225
ENSCSAG00000010985	SYNDIG1	synapse differentiation inducing 1	2.08866	0.149416	0.999983	2.02061	0.138816	0.087464	-2.32192	2.08866	0.149416	10.8805	5.964	3.25277	0	8.33796	8.00226	7.56922	6.81916
ENSCSAG00000008807			2.08009	0.190235	0.999983	1.9708	0.139221	-6.22721	-8.1931	2.08009	0.190235	3.84017	7.952	1.30111	2.36685	467.968	431.233	430.364	448.116
ENSCSAG00000001950	GLT1D1		2.07863	0.337499	0.999983	1.89338	0.332045	-1.87446	-8.51941	2.07863	0.337499	6.40028	2.982	0	0	14.5914	17.7828	11.8945	14.6125
ENSCSAG00000015062			2.06914	0.18601	0.999983	2.06914	0.18601	2.58495	0.362572	2.08341	0.158002	7.04031	4.97	9.10777	0	2.08449	0	4.32527	2.9225
ENSCSAG00000018047	XK	X-linked Kx blood group	2.05737	0.162128	0.999983	2.02036	0.133016	1.15998e-06	-2	2.05737	0.162128	5.76025	4.97	2.60222	2.36685	7.29572	4.4457	7.56922	11.69
ENSCSAG00000013410	HEY1	hes related family bHLH transcription factor with YRPW motif 1	2.0432	0.0854029	0.999983	2.05729	0.0588806	1	-1.05062	2.0432	0.0854029	2.56011	8.94599	4.55388	9.46738	5.21123	0.88914	9.73185	19.4833
ENSCSAG00000012029	TMEFF2	transmembrane protein with EGF like and two follistatin like domains 2	2.04026	0.365691	0.999983	2.55638	0.269815	1.99998	1.90331e-06	2.04026	0.365691	1.92008	1.988	0.650555	2.36685	1.04225	0	3.24395	0
ENSCSAG00000008045	BTNL8	butyrophilin like 8	2.0383	0.417225	0.999983	2.0383	0.417225	1.46061e-06	-2.99998	2.16034	0.404381	4.4802	0.993999	0.650555	0	1.04225	3.55656	3.24395	4.87083
ENSCSAG00000011059	RET		2.03019	0.390075	0.999983	1.98557	0.389369	0.736964	-1.80735	2.03019	0.390075	2.56011	1.988	1.95166	0	1.04225	1.77828	6.4879	0.974166
ENSCSAG00000005593		PR/SET domain 11	2.01291	0.202138	0.999983	1.96497	0.164207	-0.765533	-2.70043	2.01291	0.202138	5.12023	4.97	1.95166	2.36685	12.5069	4.4457	14.0571	11.69
ENSCSAG00000002671	PLXDC1	plexin domain containing 1	2.0075	0.451279	0.999983	2.0075	0.451279	1.99998	-0.584957	2.0463	0.433051	3.20014	0.993999	1.95166	0	1.04225	0	1.08132	1.94833
ENSCSAG00000004898		zinc finger protein 91-like	2.00396	0.243732	0.999983	2.0133	0.227684	1.58496	-0.415034	2.00396	0.243732	1.92008	3.976	3.90333	2.36685	1.04225	0.88914	2.16263	5.845
ENSCSAG00000009446			2.0036	0.257285	0.999983	2.0048	0.240764	1.58496	-0.415034	2.0036	0.257285	1.28006	4.97	3.90333	2.36685	1.04225	0.88914	3.24395	4.87083
ENSCSAG00000019653	CDC42EP5	CDC42 effector protein 5	1.99444	0.154806	0.999983	1.95389	0.126921	-0.20645	-2.1375	1.99444	0.154806	7.68034	4.97	3.25277	2.36685	10.4225	5.33484	9.73185	11.69
ENSCSAG00000017664	CTAGE1		1.99088	0.422076	0.999983	2.42226	0.31293	1.58495	-0.415033	1.99088	0.422076	0.640028	1.988	1.30111	2.36685	1.04225	0	4.32527	0
ENSCSAG00000011761	BAIAP3	BAI1 associated protein 3	1.98505	0.273808	0.999983	1.91967	0.267417	0.584963	-1.73696	1.98505	0.273808	3.84017	4.97	2.60222	0	3.12674	2.66742	4.32527	5.845
ENSCSAG00000013628	ANKEF1	ankyrin repeat and EF-hand domain containing 1	1.98344	0.10671	0.999983	1.98344	0.10671	1.66296	-0.289504	1.98398	0.0827296	8.9604	9.93999	7.1561	2.36685	3.12674	2.66742	1.08132	9.74166
ENSCSAG00000004785	MAPK8IP2	mitogen-activated protein kinase 8 interacting protein 2	1.98075	0.369972	0.999983	1.91628	0.358698	-0.222391	-2.70043	1.98075	0.369972	1.92008	3.976	1.95166	0	5.21123	1.77828	6.4879	6.81916
ENSCSAG00000002657	RAD9B	RAD9 checkpoint clamp component B	1.9792	0.405036	0.999983	1.9792	0.405036	-0.847993	-3.80734	2.11263	0.402993	1.92008	2.982	0.650555	0	4.16898	5.33484	6.4879	7.79333
ENSCSAG00000016581	DMTN		1.97419	0.363579	0.999983	2.24227	0.312261	0.807354	-1.99999	1.97419	0.363579	2.56011	3.976	1.30111	0	1.04225	2.66742	0	3.89666
ENSCSAG00000016247	SLC7A7	solute carrier family 7 member 7	1.969	0.179583	0.999983	1.94994	0.170168	0.652077	-1.26303	1.969	0.179583	5.12023	5.964	3.25277	2.36685	3.12674	3.55656	3.24395	8.76749
ENSCSAG00000008381	FKBP1B	FKBP prolyl isomerase 1B	1.96277	0.0487449	0.999983	1.96277	0.0487449	2.05063	0.0995372	1.96679	0.0279953	14.0806	14.91	9.75832	4.73369	5.21123	1.77828	8.65053	4.87083
ENSCSAG00000000904	RAP1GAP		1.96112	0.138134	0.999983	1.96112	0.138134	0.736966	-1.16992	1.99654	0.114903	12.1605	7.952	1.95166	2.36685	4.16898	8.00226	2.16263	6.81916
ENSCSAG00000007259	ATP6V1C2	ATPase H+ transporting V1 subunit C2	1.95826	0.457813	0.999983	1.95826	0.457813	1.32192	-1.58495	2.06935	0.414105	1.92008	2.982	1.30111	0	1.04225	0.88914	1.08132	1.94833
ENSCSAG00000010074	DRP2		1.95568	0.0729794	0.999983	1.93815	0.0402324	-0.965233	-2.89812	1.95568	0.0729794	12.1605	8.94599	9.10777	2.36685	15.6337	24.8959	40.0087	41.8891
ENSCSAG00000015305	RCOR3	REST corepressor 3	1.95256	0.0340674	0.999983	1.93739	0.0316811	0.866734	-1.05889	1.95256	0.0340674	10.8805	19.88	5.20444	7.10054	9.38021	8.00226	14.0571	10.7158
ENSCSAG00000016427	TGM4	transglutaminase 4	1.95195	0.157019	0.999983	1.95195	0.157019	2.58496	0.652078	1.93678	0.108882	7.04031	4.97	5.85499	4.73369	0	1.77828	2.16263	4.87083
ENSCSAG00000012005	BRINP2	BMP/retinoic acid inducible neural specific 2	1.94606	0.41818	0.999983	1.94606	0.41818	0.584962	-2.32191	2.08866	0.388523	1.28006	4.97	0.650555	0	2.08449	1.77828	2.16263	2.9225
ENSCSAG00000008059	DES		1.94501	0.280648	0.999983	1.94501	0.280648	0.678072	-1.22239	2.00571	0.274576	5.76025	1.988	0.650555	2.36685	4.16898	0.88914	4.32527	2.9225
ENSCSAG00000001811			1.94455	0.219363	0.999983	1.88207	0.197274	-0.387021	-2.66296	1.94455	0.219363	8.32037	4.97	3.25277	0	7.29572	9.78054	5.40658	13.6383
ENSCSAG00000012119	RSPH9	radial spoke head component 9	1.94077	0.027595	0.999983	1.94077	0.027595	2.14684	0.211505	1.943	0.0168769	11.5205	18.886	13.0111	9.46738	3.12674	4.4457	7.56922	10.7158
ENSCSAG00000000534	KCNJ16	potassium inwardly rectifying channel subfamily J member 16	1.93666	0.165685	0.999983	1.93666	0.165685	1.90689	1.93642e-06	1.94804	0.12407	7.04031	7.952	5.20444	2.36685	2.08449	1.77828	2.16263	4.87083
ENSCSAG00000019280	MGAT3	beta-1,4-mannosyl-glycoprotein 4-beta-N-acetylglucosaminyltransferase	1.93512	0.228476	0.999983	1.86683	0.213745	-0.502498	-2.32192	1.93512	0.228476	2.56011	8.94599	1.30111	2.36685	7.29572	9.78054	12.9758	1.94833
ENSCSAG00000018321	ZFY		1.9238	0.168797	0.999983	1.86277	0.147215	-0.485425	-2.32192	1.9238	0.168797	9.60042	4.97	1.95166	2.36685	11.4647	9.78054	15.1384	4.87083
ENSCSAG00000017682	ZNF12		1.92072	0.0248387	0.999983	1.92072	0.0248387	1.41504	-0.497498	1.92602	0.0215165	17.2808	14.91	9.75832	7.10054	7.29572	5.33484	8.65053	14.6125
ENSCSAG00000008088	SLC37A1	solute carrier family 37 member 1	1.91926	0.264279	0.999983	1.82666	0.237544	-0.925997	-2.73696	1.91926	0.264279	1.92008	7.952	1.30111	2.36685	10.4225	8.8914	11.8945	7.79333
ENSCSAG00000010974	EBF4		1.91327	0.353944	0.999983	1.75977	0.341401	-1.90689	-4.64384	1.91327	0.353944	5.12023	2.982	1.30111	0	13.5492	16.0045	15.1384	9.74166
ENSCSAG00000002426	RITA1	RBPJ interacting and tubulin associated 1	1.91253	0.187951	0.999983	1.89134	0.160107	0.289507	-1.58496	1.91253	0.187951	2.56011	7.952	3.90333	2.36685	5.21123	4.4457	10.8132	6.81916
ENSCSAG00000012207	PCLO		1.9081	0.361697	0.999983	2.34559	0.293283	1.80735	-0.584958	1.9081	0.361697	1.92008	4.97	1.95166	0	0	1.77828	0	2.9225
ENSCSAG00000002114	GLB1L3	galactosidase beta 1 like 3	1.90748	0.257826	0.999983	1.89066	0.249952	0.678072	-1.16992	1.90748	0.257826	3.84017	3.976	1.95166	2.36685	4.16898	0.88914	6.4879	2.9225
ENSCSAG00000015065	SNAI1	snail family transcriptional repressor 1	1.90558	0.413703	0.999983	1.90558	0.413703	2.32191	1.68157e-06	1.93366	0.387198	3.20014	1.988	2.60222	0	0	0.88914	2.16263	0.974166
ENSCSAG00000005409	SHISAL1	shisa like 1	1.87842	0.446558	0.999983	1.87842	0.446558	-0.847993	-3.70042	2.00706	0.435529	1.28006	3.976	1.30111	0	7.29572	1.77828	6.4879	6.81916
ENSCSAG00000017135	GABRA2	gamma-aminobutyric acid type A receptor subunit alpha2	1.87663	0.232457	0.999983	1.83115	0.212096	0.415038	-1.67807	1.87663	0.232457	4.4802	7.952	4.55388	0	4.16898	5.33484	7.56922	7.79333
ENSCSAG00000001314	TMEM61		1.86829	0.3567	0.999983	2.31078	0.279341	2.58494	0.415037	1.86829	0.3567	3.84017	1.988	3.90333	0	1.04225	0	3.24395	0
ENSCSAG00000018090	ELAC1		1.85919	0.0435609	0.999983	1.8571	0.0410756	1.35364	-0.497498	1.85919	0.0435609	8.9604	13.916	7.80666	9.46738	5.21123	4.4457	9.73185	13.6383
ENSCSAG00000010395	FAM89A	family with sequence similarity 89 member A	1.84848	0.314167	0.999983	1.80633	0.278839	-0.45943	-2.58496	1.84848	0.314167	3.20014	4.97	3.90333	0	7.29572	4.4457	10.8132	12.6642
ENSCSAG00000006451	KDM8	lysine demethylase 8	1.84829	0.193016	0.999983	1.84829	0.193016	0.502501	-1.73696	1.91369	0.184165	6.40028	10.934	2.60222	0	4.16898	8.00226	4.32527	5.845
ENSCSAG00000018778	GPBAR1	G protein-coupled bile acid receptor 1	1.84658	0.375225	0.999983	1.84658	0.375225	-0.192643	-2.99999	1.99108	0.363581	4.4802	2.982	1.30111	0	4.16898	3.55656	4.32527	3.89666
ENSCSAG00000000774	NMNAT1		1.84124	0.318605	0.999983	1.84124	0.318605	0.584963	-1.80735	1.91553	0.305382	4.4802	4.97	1.95166	0	2.08449	4.4457	2.16263	4.87083
ENSCSAG00000006677	BOC	BOC cell adhesion associated, oncogene regulated	1.84101	0.201365	0.999983	1.82584	0.173887	0.652077	-1.16992	1.84101	0.201365	3.20014	7.952	0.650555	7.10054	2.08449	5.33484	6.4879	11.69
ENSCSAG00000012972	PDK4	pyruvate dehydrogenase kinase 4	1.83757	0.172345	0.999983	1.83757	0.172345	2.39231	0.584963	1.83853	0.0881095	12.8006	7.952	3.90333	4.73369	0	4.4457	3.24395	2.9225
ENSCSAG00000004017			1.83747	0.314071	0.999983	1.77349	0.305676	1.46445e-06	-1.73696	1.83747	0.314071	1.92008	5.964	1.30111	2.36685	3.12674	5.33484	5.40658	4.87083
ENSCSAG00000004441	LMO1		1.83338	0.11262	0.999983	1.83338	0.11262	2.5025	0.678073	1.82642	0.069173	8.9604	7.952	7.1561	9.46738	3.12674	0	5.40658	4.87083
ENSCSAG00000013399	PITX1	paired like homeodomain 1	1.82988	0.048136	0.999983	1.80584	0.0285557	-0.452511	-2.25375	1.82988	0.048136	13.4406	24.85	11.0594	2.36685	27.0984	24.8959	27.0329	35.07
ENSCSAG00000013206	FAM83B		1.82975	0.274751	0.999983	1.78803	0.272264	0.584963	-1.16992	1.82975	0.274751	7.04031	1.988	1.95166	2.36685	2.08449	4.4457	2.16263	6.81916
ENSCSAG00000007663	RASEF	RAS and EF-hand domain containing	1.82696	0.347628	0.999983	1.80386	0.32941	0.807354	-1.26303	1.82696	0.347628	5.76025	0.993999	5.20444	0	4.16898	0	6.4879	5.845
ENSCSAG00000008213	PRDM15	PR/SET domain 15	1.8268	0.0227033	0.999983	1.80632	0.0178076	0.423808	-1.37851	1.8268	0.0227033	12.8006	41.748	8.45721	7.10054	20.8449	19.5611	16.2197	23.38
ENSCSAG00000002465	PHOSPHO1	phosphoethanolamine/phosphocholine phosphatase 1	1.82399	0.403818	0.999983	1.76319	0.400658	1.47049e-06	-2.32192	1.82399	0.403818	3.20014	2.982	1.95166	0	5.21123	0.88914	6.4879	3.89666
ENSCSAG00000007249	TUBB2B	tubulin beta-2B chain	1.82328	0.514456	0.999983	1.82328	0.514456	1.324e-06	-2.80734	1.93217	0.489617	2.56011	0.993999	1.30111	0	3.12674	0.88914	2.16263	4.87083
ENSCSAG00000010863	ALOX12B	arachidonate 12-lipoxygenase, 12R type	1.82288	0.357976	0.999983	1.82288	0.357976	1.22239	-0.999995	1.86889	0.346053	3.84017	2.982	3.25277	0	2.08449	0.88914	4.32527	1.94833
ENSCSAG00000014885	EYA2	EYA transcriptional coactivator and phosphatase 2	1.82232	0.328059	0.999983	1.82232	0.328059	0.999999	-1.22239	1.87681	0.319695	3.84017	3.976	3.25277	0	3.12674	0.88914	3.24395	3.89666
ENSCSAG00000018507	S1PR3	sphingosine-1-phosphate receptor 3	1.81793	0.193626	0.999983	1.81793	0.193626	1.09954	-0.678069	1.84351	0.167074	8.9604	5.964	2.60222	2.36685	2.08449	5.33484	5.40658	2.9225
ENSCSAG00000012648	WSCD1	WSC domain containing 1	1.8164	0.21624	0.999983	1.73629	0.179844	-1.52356	-3.66296	1.8164	0.21624	9.60042	5.964	3.25277	0	26.0561	19.5611	22.7076	14.6125
ENSCSAG00000006614	CYP2E1		1.81498	0.287549	0.999983	1.81498	0.287549	2.80734	0.999999	1.79486	0.234562	3.20014	3.976	2.60222	4.73369	1.04225	0	2.16263	1.94833
ENSCSAG00000013006	DCLRE1C		1.81246	0.0919698	0.999983	1.81246	0.0919698	1.58496	-0.206449	1.80606	0.0711678	12.1605	8.94599	7.80666	4.73369	0	7.11312	7.56922	6.81916
ENSCSAG00000018579	MC5R	melanocortin 5 receptor	1.80566	0.323592	0.999983	1.80566	0.323592	1.32193	-0.415035	1.84721	0.266562	5.12023	4.97	0.650555	2.36685	1.04225	2.66742	2.16263	1.94833
ENSCSAG00000005214	BORCS8		1.80449	0.114159	0.999983	1.80449	0.114159	1	-0.777605	1.82869	0.0958478	9.60042	13.916	1.95166	4.73369	8.33796	3.55656	7.56922	3.89666
ENSCSAG00000009397	CATSPER2	cation channel sperm-associated protein 2	1.80027	0.248153	0.999983	1.77877	0.219818	0.169926	-1.58496	1.80027	0.248153	3.84017	4.97	3.25277	2.36685	4.16898	4.4457	9.73185	4.87083
ENSCSAG00000009039	TESMIN	testis expressed metallothionein like protein	1.79766	0.366449	0.999983	1.79766	0.366449	0.999998	-0.736961	1.82639	0.355242	2.56011	2.982	0.650555	2.36685	0	2.66742	2.16263	2.9225
ENSCSAG00000002895	ZSWIM9		1.79586	0.109868	0.999983	1.79288	0.106205	1.28011	-0.502498	1.79586	0.109868	4.4802	12.922	6.50555	4.73369	3.12674	4.4457	11.8945	4.87083
ENSCSAG00000004347			1.79097	0.395951	0.999983	1.79097	0.395951	1.58495	-0.222389	2.18152	0.326058	2.56011	0	1.30111	4.73369	0	0.88914	4.32527	2.9225
ENSCSAG00000009977	TEAD3	TEA domain transcription factor 3	1.78753	0.0270673	0.999983	1.78753	0.0270673	1.22239	-0.559426	1.79575	0.0263646	14.7207	19.88	12.3605	7.10054	8.33796	7.11312	16.2197	11.69
ENSCSAG00000010369			1.7859	0.00725629	0.999983	1.7859	0.00725629	1.66742	-0.115476	1.78751	0.00542999	26.8812	26.838	24.0705	11.8342	7.29572	9.78054	15.1384	24.3542
ENSCSAG00000017698	FAM124A		1.78532	0.5202	0.999983	1.78532	0.5202	0.415037	-2.32191	1.86571	0.498683	1.92008	1.988	1.30111	0	0	2.66742	1.08132	3.89666
ENSCSAG00000012738	MYLK2	myosin light chain kinase 2	1.78446	0.238975	0.999983	1.7942	0.204949	0.678072	-1.09953	1.78446	0.238975	4.4802	3.976	5.20444	2.36685	4.16898	0.88914	7.56922	6.81916
ENSCSAG00000009925	DNASE1	deoxyribonuclease 1	1.78047	0.487304	0.999983	1.78047	0.487304	0.736964	-1.99999	1.88462	0.451558	1.92008	2.982	1.30111	0	1.04225	1.77828	3.24395	0.974166
ENSCSAG00000008906		PRELI domain containing 1	1.77319	0.435137	0.999983	1.79292	0.423693	0.999996	-0.73696	1.77319	0.435137	1.28006	2.982	0.650555	2.36685	2.08449	0	1.08132	3.89666
ENSCSAG00000001997	ZNF614		1.77129	0.20716	0.999983	1.77129	0.20716	0.893085	-0.847994	1.80224	0.194475	5.76025	6.958	3.25277	2.36685	4.16898	2.66742	6.4879	2.9225
ENSCSAG00000006261	ZNF333		1.76381	0.204454	0.999983	1.72233	0.17637	-0.299559	-2	1.76381	0.204454	7.04031	5.964	3.25277	2.36685	6.25347	9.78054	10.8132	8.76749
ENSCSAG00000004193	LRTOMT	leucine-rich repeat-containing protein 51	1.76299	0.482952	0.999983	1.76299	0.482952	-0.263032	-2.99998	1.90203	0.460936	3.84017	0.993999	1.30111	0	1.04225	5.33484	4.32527	3.89666
ENSCSAG00000009477	TSNARE1		1.76059	0.206746	0.999983	1.71909	0.178863	-0.299559	-2	1.76059	0.206746	7.68034	4.97	2.60222	2.36685	6.25347	9.78054	7.56922	11.69
ENSCSAG00000008792	PLCD4	phospholipase C delta 4	1.75838	0.101097	0.999983	1.75838	0.101097	1.87447	0.125532	1.78193	0.0611987	5.76025	37.772	5.20444	7.10054	8.33796	3.55656	2.16263	8.76749
ENSCSAG00000001982	ZNF610	zinc finger protein 610	1.75648	0.272049	0.999983	1.75648	0.272049	1.73696	2.02927e-06	1.76842	0.240626	4.4802	5.964	0.650555	4.73369	2.08449	0.88914	4.32527	1.94833
ENSCSAG00000018850	TMEM186		1.74687	0.0104698	0.999983	1.74687	0.0104698	1.23133	-0.509012	1.75156	0.0081363	28.8013	24.85	14.3122	11.8342	14.5914	8.00226	22.7076	13.6383
ENSCSAG00000012089	RRAGB	Ras related GTP binding B	1.7448	0.0797002	0.999983	1.7448	0.0797002	0.807356	-0.917536	1.76005	0.0719752	13.4406	14.91	3.90333	4.73369	11.4647	5.33484	7.56922	8.76749
ENSCSAG00000014241	LRRC9	leucine rich repeat containing 9	1.73801	0.354581	0.999983	1.67097	0.352335	0.222393	-1.41503	1.73801	0.354581	4.4802	2.982	0.650555	2.36685	3.12674	2.66742	3.24395	4.87083
ENSCSAG00000012513			1.73326	0.495799	0.999983	1.73326	0.495799	0.999995	-1.32192	1.77952	0.485677	1.92008	1.988	1.95166	0	1.04225	0.88914	4.32527	0.974166
ENSCSAG00000006592	C3orf52		1.73095	0.231462	0.999983	1.73095	0.231462	2.45942	0.736966	1.7265	0.177027	6.40028	4.97	3.25277	7.10054	1.04225	0.88914	1.08132	4.87083
ENSCSAG00000019504	TSHZ1		1.7228	0.0353943	0.999983	1.70404	0.0183464	-0.678071	-2.37851	1.7228	0.0353943	17.2808	22.862	9.75832	4.73369	32.3096	32.009	41.09	37.0183
ENSCSAG00000014681	ARRDC3	arrestin domain containing 3	1.7213	0.0407427	0.999983	1.68667	0.0184376	-2.63227	-4.31469	1.7213	0.0407427	24.3211	25.844	7.80666	2.36685	140.703	168.937	97.3185	102.287
ENSCSAG00000011869	TMEM63C		1.71924	0.0262616	0.999983	1.7165	0.0206615	1.09311	-0.621487	1.71924	0.0262616	19.8409	11.928	14.3122	11.8342	6.25347	8.8914	20.545	18.5092
ENSCSAG00000014456	ULBP3		1.71217	0.412197	0.999983	1.71217	0.412197	2.32191	0.321929	1.71629	0.402579	2.56011	1.988	4.55388	0	1.04225	0	2.16263	1.94833
ENSCSAG00000006893	PLXNB3	plexin B3	1.71085	0.211314	0.999983	1.65505	0.185464	-0.289505	-2.20163	1.71085	0.211314	5.76025	11.928	5.20444	0	10.4225	11.5588	11.8945	10.7158
ENSCSAG00000009667	FGF18	fibroblast growth factor 18	1.70437	0.287221	0.999983	1.71126	0.228054	-0.192644	-1.89308	1.70437	0.287221	1.92008	4.97	4.55388	2.36685	1.04225	7.11312	12.9758	12.6642
ENSCSAG00000018258			1.70171	0.246268	0.999983	1.71325	0.243225	1.16992	-0.51457	1.70171	0.246268	3.84017	4.97	4.55388	2.36685	0	4.4457	2.16263	7.79333
ENSCSAG00000015213	PLXNA2	plexin A2	1.70149	0.396065	0.999983	1.64775	0.379244	-0.362568	-2.41503	1.70149	0.396065	1.92008	4.97	2.60222	0	5.21123	4.4457	5.40658	10.7158
ENSCSAG00000011183			1.70029	0.362146	0.999983	1.62988	0.334817	-0.893082	-2.50249	1.70029	0.362146	4.4802	2.982	0.650555	2.36685	7.29572	6.22398	9.73185	6.81916
ENSCSAG00000005449		homeobox C6	1.69974	0.296095	0.999983	1.64961	0.261742	-0.788494	-2.75488	1.69974	0.296095	5.12023	5.964	3.90333	0	5.21123	14.2262	10.8132	15.5867
ENSCSAG00000011890	SOX8		1.69796	0.246265	0.999983	1.6946	0.216109	0.584963	-1.09953	1.69796	0.246265	4.4802	4.97	4.55388	2.36685	4.16898	1.77828	7.56922	6.81916
ENSCSAG00000017838	SLC25A15	solute carrier family 25 member 15	1.69466	0.134329	0.999983	1.69466	0.134329	1.58496	-0.106913	1.70148	0.126628	10.2405	7.952	11.0594	2.36685	3.12674	2.66742	8.65053	4.87083
ENSCSAG00000001301	TCEANC2	transcription elongation factor A N-terminal and central domain containing 2	1.68923	0.0301636	0.999983	1.68923	0.0301636	1.30485	-0.37851	1.69589	0.0238377	19.8409	21.868	7.80666	11.8342	8.33796	8.8914	9.73185	15.5867
ENSCSAG00000002829	CA11	carbonic anhydrase 11	1.68598	0.0145398	0.999983	1.68598	0.0145398	1.15754	-0.520831	1.69088	0.0105266	27.5212	29.82	11.0594	11.8342	14.5914	10.6697	20.545	11.69
ENSCSAG00000002209	TMEM45B	transmembrane protein 45B	1.6844	0.265705	0.999983	1.6844	0.265705	1.37851	-0.263032	1.70247	0.219565	5.76025	6.958	3.25277	2.36685	1.04225	3.55656	4.32527	1.94833
ENSCSAG00000012131	SHOX2	short stature homeobox 2	1.68016	0.119586	0.999983	1.67026	0.110183	0.926	-0.736964	1.68016	0.119586	5.12023	13.916	4.55388	7.10054	7.29572	2.66742	10.8132	8.76749
ENSCSAG00000012500	PCDHGA1	protocadherin gamma-A1	1.67834	0.218264	0.999983	1.67834	0.218264	5.12927	3.87446	1.25965	0.0377371	21.1209	48.706	17.565	26.0353	0	1.77828	0	2.9225
ENSCSAG00000009974	MAP2	microtubule associated protein 2	1.67546	0.10552	0.999983	1.67546	0.10552	2.1375	0.469487	1.67223	0.0721488	8.32037	13.916	11.0594	7.10054	1.04225	3.55656	7.56922	4.87083
ENSCSAG00000019435			1.66894	0.452803	0.999983	1.64814	0.443392	0.321928	-1.73696	1.66894	0.452803	1.92008	2.982	2.60222	0	2.08449	1.77828	4.32527	5.845
ENSCSAG00000003365	DNAAF1		1.66802	0.590264	0.999983	1.66802	0.590264	0.321928	-6.08646	1.81594	0.53343	2.56011	1.988	0	0	0	3.55656	3.24395	1.94833
ENSCSAG00000014354	SCAMP5		1.66792	0.384855	0.999983	1.66792	0.384855	0.415038	-1.80735	1.73784	0.37128	3.84017	3.976	1.95166	0	1.04225	5.33484	2.16263	4.87083
ENSCSAG00000006141	TAOK2	TAO kinase 2	1.66517	0.00487462	0.999983	1.6537	0.00168825	-0.751179	-2.4021	1.66517	0.00487462	51.8423	48.706	21.4683	7.10054	100.056	70.242	71.3669	76.9591
ENSCSAG00000017915	N4BP2L1		1.66136	0.497022	0.999983	1.66136	0.497022	0.999997	-1.58495	1.76305	0.448012	2.56011	2.982	0.650555	0	0	2.66742	2.16263	0.974166
ENSCSAG00000006793	PLA2G6		1.65907	0.0728064	0.999983	1.65907	0.0728064	1.20645	-0.440571	1.6658	0.0621752	13.4406	16.898	9.10777	4.73369	6.25347	7.11312	6.4879	12.6642
ENSCSAG00000004066	FAM168A	family with sequence similarity 168 member A	1.65749	0.0904419	0.999983	1.65749	0.0904419	3.61471	1.95936	1.65933	0.0101044	28.8013	19.88	18.2155	16.5679	2.08449	1.77828	4.32527	4.87083
ENSCSAG00000014905	CA5B	carbonic anhydrase 5B	1.65677	0.406534	0.999983	1.65677	0.406534	0.222393	-1.99999	1.73202	0.398633	2.56011	3.976	1.95166	0	2.08449	3.55656	5.40658	2.9225
ENSCSAG00000005872	ZNF688		1.65665	0.311503	0.999983	1.61255	0.295745	1.45239e-06	-1.58496	1.65665	0.311503	2.56011	5.964	1.95166	2.36685	5.21123	3.55656	3.24395	8.76749
ENSCSAG00000008146	GLB1L	galactosidase beta 1 like	1.64661	0.358034	0.999983	1.54496	0.353417	-0.58496	-2.70043	1.64661	0.358034	6.40028	3.976	1.95166	0	9.38021	6.22398	6.4879	6.81916
ENSCSAG00000003746	C19orf47		1.64576	0.212822	0.999983	1.59584	0.169118	-1.30256	-2.88752	1.64576	0.212822	7.68034	6.958	3.25277	2.36685	18.7604	17.7828	18.3824	19.4833
ENSCSAG00000011003	AKAP3	A-kinase anchoring protein 3	1.64157	0.31473	0.999983	1.58174	0.290104	-0.347922	-2.24792	1.64157	0.31473	5.76025	4.97	3.90333	0	10.4225	4.4457	8.65053	9.74166
ENSCSAG00000003970	LEF1		1.64085	0.107306	0.999983	1.64085	0.107306	1.8365	0.206452	1.64573	0.0741829	15.3607	9.93999	8.45721	7.10054	3.12674	4.4457	4.32527	8.76749
ENSCSAG00000006402	APOBEC3C		1.63812	0.0071428	0.999983	1.63812	0.0071428	3.74416	2.10692	1.63855	4.20058e-05	74.2433	59.64	59.8511	52.0706	3.12674	7.11312	14.0571	11.69
ENSCSAG00000015126	C2orf42	chromosome unknown C2orf42 homolog	1.63707	0.518694	0.999983	1.63707	0.518694	-0.527245	-2.32192	1.70459	0.467218	17.9208	15.904	9.75832	0	25.0139	24.0068	23.789	26.3025
ENSCSAG00000016426			1.63524	0.494114	0.999983	1.63524	0.494114	0.584962	-1.99999	1.75615	0.450934	1.92008	3.976	1.30111	0	3.12674	0.88914	3.24395	0.974166
ENSCSAG00000006722	ACP5	acid phosphatase 5, tartrate resistant	1.63083	0.467455	0.999983	1.63083	0.467455	0.999998	-1.58495	1.76643	0.397785	1.92008	5.964	1.30111	0	1.04225	2.66742	1.08132	1.94833
ENSCSAG00000001766	NUDT17		1.62358	0.38958	0.999983	1.62358	0.38958	1.16992	-0.415035	1.69249	0.336993	7.04031	1.988	1.30111	2.36685	2.08449	1.77828	2.16263	1.94833
ENSCSAG00000008233	LARGE1	LARGE xylosyl- and glucuronyltransferase 1	1.6228	0.128999	0.999983	1.56687	0.0924688	-1.63559	-3.19639	1.6228	0.128999	10.8805	16.898	3.90333	2.36685	45.8588	40.9004	27.0329	28.2508
ENSCSAG00000002975	SNX25	sorting nexin 25	1.62076	0.407667	0.999983	1.51747	0.388761	-1.85798	-3.95419	1.62076	0.407667	5.12023	2.982	1.95166	0	17.7182	10.6697	10.8132	20.4575
ENSCSAG00000013196	GFRA3	GDNF family receptor alpha 3	1.61992	0.245694	0.999983	1.61992	0.245694	2.20163	0.415039	1.65418	0.170795	12.8006	9.93999	8.45721	0	4.16898	0.88914	4.32527	1.94833
ENSCSAG00000012999	PSD2	pleckstrin and Sec7 domain containing 2	1.61591	0.173824	0.999983	1.6008	0.167567	0.678072	-0.906888	1.61591	0.173824	8.32037	7.952	3.25277	4.73369	5.21123	5.33484	7.56922	6.81916
ENSCSAG00000007119	CNTN1	contactin 1	1.61587	0.188262	0.999983	1.60739	0.188175	1.22239	-0.378509	1.61587	0.188262	7.68034	5.964	8.45721	2.36685	3.12674	2.66742	4.32527	8.76749
ENSCSAG00000018447	FRAT1	FRAT regulator of WNT signaling pathway 1	1.6148	0.479457	0.999983	1.6148	0.479457	1.74031e-06	-2.58495	1.74765	0.450946	1.92008	3.976	0.650555	0	3.12674	2.66742	1.08132	4.87083
ENSCSAG00000008250	KLHL29		1.61009	0.317305	0.999983	1.59028	0.290872	0.192646	-1.37851	1.61009	0.317305	3.84017	3.976	2.60222	2.36685	2.08449	5.33484	5.40658	7.79333
ENSCSAG00000000277	LRRC3	leucine rich repeat containing 3	1.60841	0.407945	0.999983	1.50698	0.398592	-0.999997	-3.08745	1.60841	0.407945	3.84017	3.976	1.95166	0	8.33796	8.00226	8.65053	7.79333
ENSCSAG00000008098	APOL4		1.60821	0.508787	0.999983	1.60821	0.508787	0.584962	-1.99999	1.75157	0.462081	0.640028	4.97	1.30111	0	3.12674	0.88914	1.08132	2.9225
ENSCSAG00000017864		beta-1,4-galactosyltransferase 6	1.60471	0.0552988	0.999983	1.58998	0.0406765	-0.211503	-1.79141	1.60471	0.0552988	18.5608	18.886	8.45721	4.73369	20.8449	23.1176	15.1384	30.1991
ENSCSAG00000017348		cilia and flagella associated protein 206	1.60436	0.269713	0.999983	1.60436	0.269713	1.58496	1.98988e-06	1.61463	0.235494	3.84017	7.952	4.55388	2.36685	1.04225	2.66742	5.40658	1.94833
ENSCSAG00000014224	HYAL3	hyaluronidase 3	1.6034	0.284935	0.999983	1.6034	0.284935	2.16992	0.584964	1.58205	0.24425	4.4802	4.97	3.90333	4.73369	2.08449	0	5.40658	0.974166
ENSCSAG00000016838	C4orf19	chromosome unknown C4orf19 homolog	1.5957	0.210388	0.999983	1.5718	0.1821	-0.0931082	-1.65207	1.5957	0.210388	5.12023	9.93999	5.20444	2.36685	7.29572	8.8914	15.1384	6.81916
ENSCSAG00000002018	SIGLEC10		1.59522	0.575172	0.999983	1.59522	0.575172	1.38388e-06	-2.58495	1.72863	0.538205	2.56011	0.993999	1.30111	0	1.04225	2.66742	4.32527	1.94833
ENSCSAG00000017553	RAB31	RAB31, member RAS oncogene family	1.59238	0.112223	0.999983	1.55795	0.0701638	-1.80023	-3.35363	1.59238	0.112223	13.4406	15.904	7.1561	2.36685	50.0278	50.681	55.1471	37.0183
ENSCSAG00000001775	ITGA10		1.58984	0.400714	0.999983	1.58984	0.400714	0.999999	-0.999995	1.65117	0.380665	3.20014	4.97	2.60222	0	3.12674	0.88914	4.32527	1.94833
ENSCSAG00000017872	SMAD9	SMAD family member 9	1.58915	0.185484	0.999983	1.55033	0.166384	-0.275633	-1.80735	1.58915	0.185484	8.32037	10.934	3.90333	2.36685	12.5069	9.78054	6.4879	14.6125
ENSCSAG00000002603	CUX2		1.58549	0.361155	0.999983	1.50819	0.344294	-0.58496	-2.50249	1.58549	0.361155	6.40028	3.976	3.25277	0	7.29572	8.00226	9.73185	6.81916
ENSCSAG00000018253	HSBP1L1	heat shock factor binding protein 1 like 1	1.58171	0.0967405	0.999983	1.56245	0.0804104	0.0931103	-1.45943	1.58171	0.0967405	16.6407	14.91	9.75832	2.36685	17.7182	12.448	22.7076	9.74166
ENSCSAG00000006265	NXPE3	neurexophilin and PC-esterase domain family member 3	1.58033	0.209836	0.999983	1.53305	0.154596	-1.93074	-3.45943	1.58033	0.209836	8.32037	7.952	3.90333	2.36685	26.0561	34.6764	33.5208	32.1475
ENSCSAG00000005270		IKAROS family zinc finger 4	1.57875	0.396843	0.999983	1.50848	0.38243	-0.514571	-1.99999	1.57875	0.396843	3.20014	3.976	1.30111	2.36685	5.21123	5.33484	7.56922	3.89666
ENSCSAG00000005165	DUSP5		1.57609	0.18277	0.999983	1.57048	0.143238	0.347924	-1.22239	1.57609	0.18277	3.20014	10.934	7.1561	4.73369	5.21123	6.22398	12.9758	14.6125
ENSCSAG00000015215	ATP6V1B1	ATPase H+ transporting V1 subunit B1	1.57584	0.328212	0.999983	1.56429	0.309842	0.678072	-0.874466	1.57584	0.328212	2.56011	4.97	1.30111	4.73369	3.12674	1.77828	7.56922	2.9225
ENSCSAG00000013511	MTRF1L		1.57542	0.305793	0.999983	1.49959	0.285944	-0.836499	-2.73696	1.57542	0.305793	5.12023	8.94599	3.25277	0	17.7182	7.11312	10.8132	8.76749
ENSCSAG00000017893	NOL4	nucleolar protein 4	1.57485	0.316016	0.999983	1.51466	0.277168	-1.20163	-2.70043	1.57485	0.316016	5.76025	3.976	1.95166	2.36685	9.38021	14.2262	7.56922	17.535
ENSCSAG00000014530			1.57211	0.588757	0.999983	1.57211	0.588757	1.58495	-0.584957	1.58979	0.579986	1.92008	0.993999	1.95166	0	1.04225	0	2.16263	0.974166
ENSCSAG00000017311		stabilizer of axonemal microtubules 2	1.57211	0.588757	0.999983	1.57211	0.588757	1.58495	-0.584957	1.58979	0.579986	1.28006	1.988	1.95166	0	0	0.88914	2.16263	0.974166
ENSCSAG00000002447	TECTA		1.56976	0.57378	0.999983	1.56976	0.57378	-2.39231	-4.95417	1.70535	0.543442	1.28006	2.982	1.30111	0	10.4225	10.6697	16.2197	14.6125
ENSCSAG00000000600		peptidyl-prolyl cis-trans isomerase FKBP3	1.56283	0.646074	0.999983	1.56283	0.646074	1.35171e-06	-2.58494	2.07046	0.50273	0	3.976	1.30111	0	2.08449	1.77828	2.16263	3.89666
ENSCSAG00000014433	PLEKHG1	pleckstrin homology and RhoGEF domain containing G1	1.55918	0.162842	0.999983	1.55918	0.162842	1.16992	-0.37851	1.57103	0.150082	8.32037	9.93999	5.20444	4.73369	4.16898	3.55656	5.40658	7.79333
ENSCSAG00000011186	SLC2A11	solute carrier family 2 member 11	1.55763	0.175287	0.999983	1.52382	0.13142	-1.20163	-2.7162	1.55763	0.175287	10.2405	9.93999	5.20444	2.36685	26.0561	20.4502	25.9516	20.4575
ENSCSAG00000014780	NHS	NHS actin remodeling regulator	1.55354	0.380969	0.999983	1.53366	0.36301	0.415038	-1.37851	1.55354	0.380969	3.20014	4.97	5.20444	0	5.21123	0.88914	3.24395	9.74166
ENSCSAG00000010921	ZNF32	zinc finger protein 32	1.55303	0.0998794	0.999983	1.52994	0.0658971	-0.843274	-2.36923	1.55303	0.0998794	12.8006	20.874	9.75832	2.36685	33.3518	27.5633	30.2769	32.1475
ENSCSAG00000008417	UNC5B		1.54777	0.577196	0.999983	2.16095	0.388765	0.415038	-1.99997	1.54777	0.577196	2.56011	0.993999	1.30111	0	3.12674	0	4.32527	0
ENSCSAG00000016604	ZNF35	zinc finger protein 35	1.54615	0.0561295	0.999983	1.5433	0.0542869	0.830076	-0.706267	1.54615	0.0561295	16.0007	15.904	9.75832	9.46738	6.25347	11.5588	20.545	9.74166
ENSCSAG00000012720	RAB40C	RAB40C, member RAS oncogene family	1.54378	0.192525	0.999983	1.53215	0.137997	-0.736964	-2.26303	1.54378	0.192525	3.84017	10.934	4.55388	4.73369	14.5914	9.78054	23.789	24.3542
ENSCSAG00000012143			1.54324	0.40049	0.999983	1.52604	0.361337	-0.58496	-2.08746	1.54324	0.40049	2.56011	2.982	1.95166	2.36685	6.25347	2.66742	11.8945	4.87083
ENSCSAG00000015494	VASH2	vasohibin 2	1.5426	0.180565	0.999983	1.51128	0.176698	0.304856	-1.19264	1.5426	0.180565	7.04031	13.916	1.95166	4.73369	8.33796	8.8914	6.4879	9.74166
ENSCSAG00000001042	PTP4A2	protein tyrosine phosphatase 4A2	1.53863	0.0419936	0.999983	1.52431	0.016685	-2.14048	-3.66073	1.53863	0.0419936	21.761	21.868	8.45721	9.46738	86.5063	106.697	105.969	109.107
ENSCSAG00000000132	C1orf216	chromosome unknown C1orf216 homolog	1.53858	0.0623127	0.999983	1.53858	0.0623127	0.917538	-0.612975	1.54475	0.0600016	19.2008	14.91	9.75832	7.10054	10.4225	8.00226	8.65053	16.5608
ENSCSAG00000004377	PWWP2B	PWWP domain containing 2B	1.53735	0.176776	0.999983	1.50432	0.13905	-0.75002	-2.24792	1.53735	0.176776	5.76025	15.904	5.85499	2.36685	21.8871	15.1154	21.6263	15.5867
ENSCSAG00000018186	TNFRSF11A		1.53705	0.128578	0.999983	1.51641	0.114874	0.452513	-1.05889	1.53705	0.128578	14.0806	11.928	9.75832	2.36685	12.5069	6.22398	11.8945	12.6642
ENSCSAG00000013132	CILK1	ciliogenesis associated kinase 1	1.53401	0.346955	0.999983	1.4562	0.32756	-0.874467	-2.73696	1.53401	0.346955	4.4802	7.952	3.25277	0	10.4225	12.448	11.8945	7.79333
ENSCSAG00000010844			1.53294	0.40867	0.999983	1.46727	0.39073	-0.777605	-2.22239	1.53294	0.40867	3.84017	2.982	1.30111	2.36685	4.16898	8.00226	8.65053	4.87083
ENSCSAG00000015421	HECW1		1.52966	0.208639	0.999983	1.47202	0.193394	-0.273017	-2	1.52966	0.208639	13.4406	10.934	4.55388	0	16.6759	12.448	8.65053	10.7158
ENSCSAG00000013014	DLX6		1.52512	0.103193	0.999983	1.52512	0.103193	2.05063	0.523563	1.53246	0.0759036	13.4406	15.904	17.565	4.73369	3.12674	3.55656	7.56922	7.79333
ENSCSAG00000017119	EPM2A	EPM2A glucan phosphatase, laforin	1.52325	0.177115	0.999983	1.51279	0.176152	0.917538	-0.58496	1.52325	0.177115	7.68034	8.94599	3.25277	7.10054	5.21123	3.55656	8.65053	5.845
ENSCSAG00000008716	METTL22	methyltransferase like 22	1.51676	0.119661	0.999983	1.49139	0.077048	-1.4021	-2.88752	1.51676	0.119661	13.4406	14.91	2.60222	7.10054	37.5208	36.4547	40.0087	34.0958
ENSCSAG00000006881	RCOR2	REST corepressor 2	1.51602	0.0862362	0.999983	1.49859	0.0649484	-0.129282	-1.62149	1.51602	0.0862362	14.0806	17.892	7.80666	4.73369	17.7182	16.8937	18.3824	22.4058
ENSCSAG00000013518	CORO2B	coronin 2B	1.51197	0.393781	0.999983	1.44063	0.390433	-0.321926	-1.73696	1.51197	0.393781	3.84017	3.976	1.30111	2.36685	4.16898	6.22398	5.40658	4.87083
ENSCSAG00000006082	DTX4	deltex E3 ubiquitin ligase 4	1.50792	0.406333	0.999983	1.50792	0.406333	-0.125529	-2.58495	1.63642	0.369256	2.56011	7.952	1.30111	0	8.33796	4.4457	1.08132	4.87083
ENSCSAG00000008775	RNF185	ring finger protein 185	1.50456	0.0515392	0.999983	1.50456	0.0515392	2.39232	0.887526	1.50703	0.0216956	23.041	18.886	19.5166	16.5679	4.16898	3.55656	8.65053	10.7158
ENSCSAG00000013464	PHF7	PHD finger protein 7	1.50444	0.721118	0.999983	1.50444	0.721118	-2.08745	-8.34947	1.65305	0.622683	1.28006	2.982	0	0	7.29572	9.78054	10.8132	12.6642
ENSCSAG00000003691	DLG2		1.5004	0.229756	0.999983	1.44902	0.213995	-0.295455	-2	1.5004	0.229756	11.5205	9.93999	5.20444	0	15.6337	10.6697	6.4879	13.6383
ENSCSAG00000019176	LRRN4CL	LRRN4 C-terminal like	1.4994	0.481195	0.999983	1.58001	0.421752	1.58495	2.52428e-06	1.4994	0.481195	1.28006	1.988	1.30111	4.73369	0	0.88914	3.24395	2.9225
ENSCSAG00000014635	CDK18	cyclin dependent kinase 18	1.49919	0.186677	0.999983	1.49919	0.186677	1.20163	-0.289505	1.52429	0.157921	8.9604	13.916	7.1561	2.36685	5.21123	5.33484	5.40658	5.845
ENSCSAG00000018685	DNAJC28	DnaJ heat shock protein family (Hsp40) member C28	1.49547	0.0606743	0.999983	1.49547	0.0606743	1.32193	-0.169924	1.49551	0.0563734	14.0806	15.904	11.71	11.8342	7.29572	5.33484	9.73185	16.5608
ENSCSAG00000005891	SNED1	sushi, nidogen and EGF like domains 1	1.49411	0.170968	0.999983	1.47106	0.14086	0.0703902	-1.39855	1.49411	0.170968	7.68034	12.922	9.10777	2.36685	10.4225	9.78054	14.0571	14.6125
ENSCSAG00000005230	METTL15	methyltransferase like 15	1.48986	0.136596	0.999983	1.48986	0.136596	1.28951	-0.192643	1.49394	0.123626	12.1605	9.93999	9.10777	4.73369	4.16898	5.33484	6.4879	9.74166
ENSCSAG00000006459			1.48922	0.139612	0.999983	1.48922	0.139612	0.559428	-0.917536	1.51428	0.133621	14.0806	13.916	6.50555	2.36685	6.25347	13.3371	7.56922	8.76749
ENSCSAG00000007001	ZNF783		1.4864	0.528132	0.999983	1.65004	0.487505	2.0767e-06	-2.32191	1.4864	0.528132	0.640028	4.97	1.30111	0	4.16898	1.77828	0	4.87083
ENSCSAG00000000216	GGACT	gamma-glutamylamine cyclotransferase	1.48149	0.132669	0.999983	1.47736	0.115037	0.736966	-0.736964	1.48149	0.132669	10.2405	9.93999	9.75832	4.73369	6.25347	6.22398	12.9758	11.69
ENSCSAG00000004572	FA2H	fatty acid 2-hydroxylase	1.48038	0.0918533	0.999983	1.48038	0.0918533	1.25376	-0.222391	1.48944	0.0830338	16.0007	14.91	13.0111	4.73369	6.25347	7.11312	11.8945	8.76749
ENSCSAG00000009214	VAV1		1.47703	0.380126	0.999983	1.43348	0.362969	-0.169923	-1.58496	1.47703	0.380126	3.20014	4.97	1.95166	2.36685	6.25347	2.66742	7.56922	3.89666
ENSCSAG00000019040	EPOP	elongin BC and polycomb repressive complex 2 associated protein	1.47159	0.161972	0.999983	1.46716	0.118921	-0.160464	-1.62149	1.47159	0.161972	9.60042	6.958	5.85499	7.10054	11.4647	8.00226	27.0329	12.6642
ENSCSAG00000005317	TOX3	TOX high mobility group box family member 3	1.47145	0.314029	0.999983	1.47145	0.314029	1.45943	1.98988e-06	1.49029	0.28436	4.4802	6.958	5.20444	2.36685	1.04225	2.66742	2.16263	4.87083
ENSCSAG00000013294	UBOX5		1.4703	0.706048	0.999983	1.4703	0.706048	1.20945	-0.378509	1.53307	0.587763	20.4809	16.898	19.5166	0	8.33796	8.00226	7.56922	17.535
ENSCSAG00000017044	HECA		1.46623	0.335076	0.999983	1.38751	0.306354	-1.47804	-3.27301	1.46623	0.335076	7.68034	5.964	3.25277	0	20.8449	17.7828	15.1384	13.6383
ENSCSAG00000013493	PTP4A1		1.46332	0.0491379	0.999983	1.45311	0.0192583	-2.23405	-3.68523	1.46332	0.0491379	16.6407	26.838	7.80666	14.2011	94.8443	112.032	116.782	165.608
ENSCSAG00000009559	FRMD5		1.4623	0.334564	0.999983	1.44396	0.33283	0.847997	-0.58496	1.4623	0.334564	3.20014	5.964	3.90333	2.36685	3.12674	1.77828	5.40658	3.89666
ENSCSAG00000015918	DHRS2		1.45919	0.4901	0.999983	1.4716	0.451765	1.10174e-06	-1.45943	1.45919	0.4901	2.56011	0.993999	1.95166	2.36685	1.04225	2.66742	6.4879	4.87083
ENSCSAG00000015029	SLC9A8		1.45766	0.183591	0.999983	1.44359	0.155947	1.05466e-06	-1.43296	1.45766	0.183591	8.32037	10.934	3.25277	7.10054	5.21123	14.2262	14.0571	12.6642
ENSCSAG00000009842	ZNF513	zinc finger protein 513	1.45693	0.118191	0.999983	1.44421	0.080729	-0.509013	-1.94753	1.45693	0.118191	8.9604	16.898	6.50555	7.10054	22.9294	14.2262	28.1142	26.3025
ENSCSAG00000001193	B4GALT2		1.45046	0.259465	0.999983	1.39896	0.202597	-2.27009	-3.66296	1.45046	0.259465	3.84017	12.922	3.90333	2.36685	37.5208	44.457	37.8461	37.9925
ENSCSAG00000011202	NHSL2		1.44672	0.218446	0.999983	1.44672	0.218446	0.906891	-0.530512	1.4603	0.216173	8.9604	5.964	3.90333	4.73369	5.21123	2.66742	6.4879	6.81916
ENSCSAG00000018667	FOXS1	forkhead box S1	1.44612	0.0761996	0.999983	1.44612	0.0761996	1.58496	0.144391	1.4565	0.0450774	23.681	32.802	15.6133	4.73369	7.29572	11.5588	5.40658	13.6383
ENSCSAG00000008776			1.44242	0.42422	0.999983	1.40829	0.420492	0.678072	-0.999996	1.44242	0.42422	5.76025	1.988	5.20444	0	1.04225	4.4457	4.32527	5.845
ENSCSAG00000002674	TOMM40L	translocase of outer mitochondrial membrane 40 like	1.43933	0.303438	0.999983	1.38506	0.260559	-1.42626	-3.07038	1.43933	0.303438	7.68034	7.952	5.20444	0	23.9716	18.6719	22.7076	19.4833
ENSCSAG00000010909			1.43681	0.465446	0.999983	1.43681	0.465446	2.16992	0.415037	1.48248	0.398847	6.40028	2.982	3.90333	0	0	1.77828	1.08132	1.94833
ENSCSAG00000000807	MIIP	migration and invasion inhibitory protein	1.43593	0.299642	0.999983	1.39415	0.28735	-0.106914	-1.48542	1.43593	0.299642	8.32037	4.97	2.60222	2.36685	8.33796	6.22398	7.56922	5.845
ENSCSAG00000008524			1.43401	0.434689	0.999983	1.36893	0.428298	-0.637427	-2.41503	1.43401	0.434689	1.92008	6.958	3.25277	0	9.38021	5.33484	10.8132	4.87083
ENSCSAG00000009553	FMN2		1.43381	0.4375	0.999983	1.44437	0.429194	0.584962	-0.80735	1.43381	0.4375	1.92008	3.976	1.95166	2.36685	0	3.55656	6.4879	0.974166
ENSCSAG00000000926	E2F2	E2F transcription factor 2	1.43289	0.120242	0.999983	1.43289	0.120242	1.12553	-0.304853	1.43914	0.119345	12.1605	11.928	5.20444	11.8342	7.29572	4.4457	10.8132	9.74166
ENSCSAG00000011671	PDGFRB	platelet derived growth factor receptor beta	1.4321	0.488323	0.999983	1.4321	0.488323	-0.58496	-2.99999	1.59461	0.455453	1.28006	6.958	0.650555	0	4.16898	8.00226	4.32527	3.89666
ENSCSAG00000012497	PCDHGB7		1.42957	0.683026	0.999983	1.42957	0.683026	2.152	0.540568	1.55718	0.569295	14.7207	24.85	15.6133	0	5.21123	3.55656	5.40658	5.845
ENSCSAG00000014613	SNX24	sorting nexin 24	1.42807	0.282334	0.999983	1.41747	0.236913	1.09689e-06	-1.41503	1.42807	0.282334	6.40028	4.97	6.50555	2.36685	6.25347	5.33484	15.1384	8.76749
ENSCSAG00000005365	PGPEP1		1.42721	0.199196	0.999983	1.40741	0.176606	0.341038	-1.06413	1.42721	0.199196	8.9604	9.93999	9.10777	2.36685	10.4225	5.33484	11.8945	10.7158
ENSCSAG00000013439	PCBD2	pterin-4 alpha-carbinolamine dehydratase 2	1.42469	0.035543	0.999983	1.42469	0.035543	1.04731	-0.374395	1.43289	0.0315509	23.041	38.766	17.565	9.46738	17.7182	11.5588	16.2197	18.5092
ENSCSAG00000006579	CPEB3	cytoplasmic polyadenylation element binding protein 3	1.4234	0.395717	0.999983	1.40949	0.360578	-0.192643	-1.58496	1.4234	0.395717	3.20014	3.976	2.60222	2.36685	5.21123	2.66742	6.4879	8.76749
ENSCSAG00000009395	UBP1	upstream binding protein 1	1.42186	0.0196591	0.999983	1.41034	0.00798941	-0.912052	-2.32193	1.42186	0.0196591	46.082	46.718	24.7211	7.10054	93.8021	80.9117	70.2856	89.6233
ENSCSAG00000012453	FCHSD1	FCH and double SH3 domains 1	1.41977	0.248683	0.999983	1.39836	0.220252	1.11501e-06	-1.39231	1.41977	0.248683	7.68034	6.958	5.85499	2.36685	9.38021	6.22398	9.73185	10.7158
ENSCSAG00000001587	WNT2B		1.41959	0.449606	0.999983	1.41959	0.449606	0.415038	-1.41503	1.48561	0.437337	1.92008	5.964	2.60222	0	2.08449	4.4457	2.16263	5.845
ENSCSAG00000011170	TSPO2	translocator protein 2	1.4129	0.373939	0.999983	1.42175	0.365338	1.22239	-0.192643	1.4129	0.373939	5.12023	1.988	4.55388	2.36685	2.08449	0.88914	4.32527	3.89666
ENSCSAG00000014653	TMEM17	transmembrane protein 17	1.41152	0.176901	0.999983	1.41152	0.176901	2.16992	0.765536	1.41655	0.103782	12.1605	14.91	8.45721	9.46738	3.12674	2.66742	3.24395	6.81916
ENSCSAG00000007881	SLC17A3	solute carrier family 17 member 3	1.41069	0.200228	0.999983	1.41069	0.200228	1.52356	0.115479	1.42596	0.170399	12.8006	9.93999	11.0594	2.36685	5.21123	2.66742	5.40658	6.81916
ENSCSAG00000008511	PIP5K1B		1.41045	0.533119	0.999983	1.41045	0.533119	-0.415035	-2.80734	1.56266	0.499501	3.84017	1.988	1.30111	0	2.08449	6.22398	3.24395	3.89666
ENSCSAG00000012011	ADAMTSL5	ADAMTS like 5	1.40957	0.445724	0.999983	1.34576	0.430467	-0.999997	-2.32192	1.40957	0.445724	3.84017	2.982	1.30111	2.36685	7.29572	7.11312	5.40658	9.74166
ENSCSAG00000015777	RSPH4A	radial spoke head component 4A	1.40799	0.429129	0.999983	1.40799	0.429129	2.80734	1.41503	1.38611	0.364654	1.92008	4.97	2.60222	4.73369	0	0.88914	2.16263	0.974166
ENSCSAG00000009115	ZNF696	zinc finger protein 696	1.40376	0.236792	0.999983	1.38388	0.220923	-0.152002	-1.51457	1.40376	0.236792	7.68034	9.93999	4.55388	2.36685	14.5914	5.33484	15.1384	4.87083
ENSCSAG00000000258	LRRN2	leucine rich repeat neuronal 2	1.40261	0.112615	0.999983	1.40261	0.112615	1.47805	0.0824634	1.4106	0.080885	16.6407	21.868	13.0111	4.73369	4.16898	9.78054	8.65053	7.79333
ENSCSAG00000001036	TINAGL1	tubulointerstitial nephritis antigen like 1	1.39775	0.31826	0.999983	1.40263	0.290208	0.584963	-0.807352	1.39775	0.31826	4.4802	4.97	3.25277	4.73369	4.16898	1.77828	5.40658	8.76749
ENSCSAG00000016841	PNPLA7		1.39774	0.300838	0.999983	1.34977	0.277862	-0.234464	-1.80735	1.39774	0.300838	8.32037	8.94599	5.85499	0	8.33796	12.448	9.73185	10.7158
ENSCSAG00000001163	RIMKLA		1.39624	0.503478	0.999983	1.86102	0.387833	1.32192	1.66231e-06	1.39624	0.503478	2.56011	1.988	1.30111	2.36685	2.08449	0	3.24395	0
ENSCSAG00000006478	OCA2	OCA2 melanosomal transmembrane protein	1.39298	0.137075	0.999983	1.37706	0.116692	9.1418e-07	-1.36923	1.39298	0.137075	15.3607	11.928	7.1561	4.73369	10.4225	16.8937	11.8945	19.4833
ENSCSAG00000009640	CLBA1	clathrin binding box of aftiphilin containing 1	1.39022	0.278811	0.999983	1.36449	0.245387	-0.362569	-1.7162	1.39022	0.278811	5.76025	7.952	4.55388	2.36685	10.4225	8.00226	16.2197	6.81916
ENSCSAG00000014633	LOX	lysyl oxidase	1.3856	0.169913	0.999983	1.3856	0.169913	3.16992	1.78427	1.38891	0.051548	21.1209	14.91	16.9144	14.2011	1.04225	2.66742	3.24395	5.845
ENSCSAG00000007167	CYS1	cystin 1	1.3855	0.382534	0.999983	1.3855	0.382534	0.362571	-0.999996	1.43035	0.375035	4.4802	4.97	1.95166	2.36685	3.12674	3.55656	5.40658	2.9225
ENSCSAG00000008542	RAD9A	RAD9 checkpoint clamp component A	1.38441	0.0687348	0.999983	1.37119	0.0488717	-0.274174	-1.64046	1.38441	0.0687348	21.761	20.874	7.80666	9.46738	27.0984	24.8959	28.1142	25.3283
ENSCSAG00000010703	DTWD1	tRNA-uridine aminocarboxypropyltransferase 1	1.38248	0.107748	0.999983	1.37571	0.086112	0.44746	-0.925998	1.38248	0.107748	16.0007	13.916	14.9628	4.73369	9.38021	13.3371	19.4637	19.4833
ENSCSAG00000002692	SIDT2	SID1 transmembrane family member 2	1.37865	0.0103583	0.999983	1.37407	0.00650183	0.448985	-0.924448	1.37865	0.0103583	39.6818	45.724	31.8772	16.5679	28.1406	34.6764	52.9845	39.9408
ENSCSAG00000016234	ATOH8		1.37822	0.32975	0.999983	1.33192	0.291739	-1.05889	-2.37851	1.37822	0.32975	6.40028	5.964	3.25277	2.36685	17.7182	7.11312	14.0571	11.69
ENSCSAG00000009896	SMKR1		1.37675	0.752595	0.999983	1.37675	0.752595	-1.32192	-7.46496	1.533	0.646816	1.28006	2.982	0	0	6.25347	3.55656	7.56922	4.87083
ENSCSAG00000002334		SREBF pathway regulator in golgi 1	1.37492	0.409645	0.999983	1.29543	0.373673	-3.21299	-4.92282	1.37492	0.409645	4.4802	6.958	3.25277	0	57.3235	45.3461	49.7406	40.915
ENSCSAG00000011934	KLF10	Kruppel like factor 10	1.37222	1.03506e-05	0.123596	1.37212	5.51704e-07	-0.481652	-1.8531	1.37222	1.03506e-05	167.687	160.034	121.003	82.8396	212.618	245.403	362.241	375.054
ENSCSAG00000000028	MT-ND4		1.36827	0.0864536	0.999983	1.36827	0.0864536	1.92349	0.558734	1.36729	0.0332328	200.329	259.434	154.182	63.9048	35.4363	86.2466	29.1955	118.848
ENSCSAG00000007469	ARHGEF6	Rac/Cdc42 guanine nucleotide exchange factor 6	1.36393	0.625614	0.999983	1.36393	0.625614	-0.80735	-3.16991	1.48672	0.584279	1.92008	1.988	1.30111	0	5.21123	1.77828	6.4879	2.9225
ENSCSAG00000000981	ZDHHC18		1.36327	0.16699	0.999983	1.34431	0.140899	-0.15754	-1.49476	1.36327	0.16699	8.32037	17.892	5.85499	4.73369	17.7182	10.6697	14.0571	16.5608
ENSCSAG00000008420			1.35718	0.324291	0.999983	1.30573	0.278816	-1.50901	-2.80735	1.35718	0.324291	7.04031	5.964	2.60222	2.36685	16.6759	19.5611	17.3011	17.535
ENSCSAG00000009366	ADGRB1		1.35437	0.263196	0.999983	1.33038	0.222527	-0.485425	-1.80735	1.35437	0.263196	7.04031	7.952	3.25277	4.73369	9.38021	12.448	18.3824	9.74166
ENSCSAG00000019557	MID1IP1	MID1 interacting protein 1	1.35363	0.0771459	0.999983	1.34511	0.0731532	0.499572	-0.839534	1.35363	0.0771459	22.401	18.886	12.3605	7.10054	19.8027	8.8914	16.2197	17.535
ENSCSAG00000016149	LYPD6	LY6/PLAUR domain containing 6	1.35082	0.510175	0.999983	1.35082	0.510175	1.81717e-06	-2.32192	1.49516	0.461659	2.56011	4.97	1.30111	0	3.12674	5.33484	3.24395	1.94833
ENSCSAG00000003108	MYPOP		1.35077	0.612746	0.999983	1.35077	0.612746	0.736963	-1.58495	1.47805	0.55962	1.28006	3.976	1.30111	0	0	2.66742	2.16263	0.974166
ENSCSAG00000002966	C12orf75		1.35065	0.400595	0.999983	1.3012	0.364269	-1.41503	-2.70043	1.35065	0.400595	5.12023	3.976	1.95166	2.36685	12.5069	10.6697	12.9758	12.6642
ENSCSAG00000012916	MAGIX		1.34998	0.565587	0.999983	1.34998	0.565587	1.76106e-06	-2.32192	1.48423	0.517961	4.4802	1.988	1.30111	0	4.16898	1.77828	3.24395	1.94833
ENSCSAG00000009360	TMEM254	transmembrane protein 254	1.34754	0.0512043	0.999983	1.34754	0.0512043	2.23704	0.888969	1.35055	0.0237473	31.3614	34.79	35.7805	14.2011	4.16898	9.78054	10.8132	15.5867
ENSCSAG00000014423	SOX13	SRY-box transcription factor 13	1.34746	0.221212	0.999983	1.33968	0.185859	0.0931103	-1.24101	1.34746	0.221212	8.32037	7.952	5.85499	4.73369	8.33796	7.11312	12.9758	12.6642
ENSCSAG00000005308		growth differentiation factor 11	1.34681	0.13835	0.999983	1.32932	0.112926	-0.302562	-1.62449	1.34681	0.13835	16.6407	12.922	7.1561	4.73369	23.9716	13.3371	16.2197	21.4317
ENSCSAG00000019598	PURB	purine rich element binding protein B	1.34193	0.0378613	0.999983	1.34193	0.0378613	1.83289	0.490987	1.34276	0.0252061	27.5212	28.826	16.2639	35.5027	9.38021	7.11312	24.8703	11.69
ENSCSAG00000005379	PRR5	proline rich 5	1.34176	0.0355646	0.999983	1.33346	0.0251678	-0.0234584	-1.35364	1.34176	0.0355646	25.6011	34.79	14.9628	11.8342	29.1829	32.8982	44.334	25.3283
ENSCSAG00000019423			1.33911	0.419153	0.999983	1.33911	0.419153	-0.415035	-1.73696	1.43511	0.414417	1.92008	6.958	1.30111	2.36685	7.29572	5.33484	4.32527	5.845
ENSCSAG00000015145	FAM151B	family with sequence similarity 151 member B	1.33828	0.137147	0.999983	1.32309	0.109686	7.99007e-07	-1.32193	1.33828	0.137147	15.3607	22.862	15.6133	2.36685	11.4647	26.6742	19.4637	26.3025
ENSCSAG00000013025			1.336	0.364922	0.999983	1.336	0.364922	0.485428	-1.16992	1.4053	0.347138	7.68034	5.964	3.90333	0	5.21123	5.33484	3.24395	5.845
ENSCSAG00000011314	LYSMD2	LysM domain containing 2	1.33564	0.325724	0.999983	1.32946	0.302353	0.514574	-0.807352	1.33564	0.325724	5.12023	4.97	3.25277	4.73369	4.16898	2.66742	7.56922	5.845
ENSCSAG00000010323	GABRG2	gamma-aminobutyric acid type A receptor subunit gamma2	1.33193	0.705686	0.999983	1.33193	0.705686	1.04054e-06	-2.32191	1.42664	0.650828	1.92008	0.993999	1.30111	0	1.04225	1.77828	4.32527	0.974166
ENSCSAG00000004285			1.33107	0.271709	0.999983	1.33107	0.271709	1	-0.321926	1.36019	0.244444	8.9604	8.94599	5.85499	2.36685	5.21123	3.55656	5.40658	4.87083
ENSCSAG00000004458	ST3GAL2	ST3 beta-galactoside alpha-2,3-sialyltransferase 2	1.32906	0.212361	0.999983	1.30304	0.153828	-1.60572	-2.90689	1.32906	0.212361	14.0806	8.94599	7.80666	2.36685	34.3941	36.4547	37.8461	37.0183
ENSCSAG00000005205	NR2C2AP		1.32587	0.0667905	0.999983	1.32587	0.0667905	2.13245	0.807356	1.32777	0.031389	32.0014	24.85	27.9739	14.2011	3.12674	9.78054	11.8945	11.69
ENSCSAG00000009139	NUP62CL	nucleoporin 62 C-terminal like	1.32535	0.373258	0.999983	1.32535	0.373258	2.32192	1	1.32139	0.310946	2.56011	6.958	4.55388	4.73369	0	1.77828	2.16263	2.9225
ENSCSAG00000002032	VSIG10L		1.32122	0.265396	0.999983	1.29374	0.239919	1.06054e-06	-1.2895	1.32122	0.265396	12.8006	4.97	6.50555	2.36685	10.4225	8.00226	11.8945	9.74166
ENSCSAG00000002193	TMEM120B		1.32012	0.134482	0.999983	1.31453	0.107408	-0.0962144	-1.40439	1.32012	0.134482	17.2808	11.928	12.3605	4.73369	17.7182	13.3371	33.5208	10.7158
ENSCSAG00000001961	CHRNB2		1.31958	0.638132	0.999983	1.43959	0.582479	0.999989	-0.415033	1.31958	0.638132	1.28006	0.993999	0.650555	2.36685	0	0.88914	1.08132	2.9225
ENSCSAG00000010264	SHF		1.31841	0.462895	0.999983	1.24721	0.454555	-0.999997	-2.66296	1.31841	0.462895	5.76025	2.982	3.25277	0	10.4225	8.00226	11.8945	6.81916
ENSCSAG00000009330			1.31818	0.269228	0.999983	1.31818	0.269228	2.53605	1.22239	1.33284	0.134137	12.1605	16.898	6.50555	7.10054	3.12674	1.77828	2.16263	3.89666
ENSCSAG00000017122	ZNF710	zinc finger protein 710	1.3171	0.19691	0.999983	1.30426	0.164175	-0.0703883	-1.36923	1.3171	0.19691	10.8805	8.94599	6.50555	4.73369	11.4647	9.78054	9.73185	21.4317
ENSCSAG00000013329	KLHL3	kelch like family member 3	1.31637	0.524639	0.999983	1.26663	0.518057	-0.485424	-1.73696	1.31637	0.524639	1.92008	2.982	1.30111	2.36685	4.16898	2.66742	4.32527	5.845
ENSCSAG00000016070	GATA5		1.31475	0.0422704	0.999983	1.31194	0.0335472	0.231326	-1.07529	1.31475	0.0422704	24.9611	28.826	14.3122	14.2011	31.2674	15.1154	30.2769	29.225
ENSCSAG00000004653	CDR2L	cerebellar degeneration related protein 2 like	1.31279	0.139858	0.999983	1.30267	0.0989215	-0.550196	-1.848	1.31279	0.139858	11.5205	15.904	5.85499	9.46738	18.7604	22.2285	27.0329	27.2766
ENSCSAG00000007908	BTN3A2	butyrophilin subfamily 3 member A3	1.31274	0.595068	0.999983	1.31274	0.595068	1.32192	-0.584958	1.38544	0.549719	3.20014	1.988	1.95166	0	1.04225	0.88914	1.08132	1.94833
ENSCSAG00000007310	SECISBP2	SECIS binding protein 2	1.31202	0.746342	0.999983	1.31202	0.746342	-0.736963	-2.14135	1.34016	0.622311	15.3607	20.874	16.9144	0	33.3518	26.6742	37.8461	37.0183
ENSCSAG00000000451	HRCT1		1.31136	0.181844	0.999983	1.31136	0.181844	1.77761	0.469486	1.31671	0.136629	12.1605	11.928	9.10777	9.46738	3.12674	3.55656	6.4879	6.81916
ENSCSAG00000010029	ZNF174	zinc finger protein 174	1.30994	0.155038	0.999983	1.30994	0.155038	1	-0.304853	1.31425	0.151714	8.32037	15.904	7.80666	9.46738	8.33796	4.4457	14.0571	6.81916
ENSCSAG00000005540	KAZALD1	Kazal type serine peptidase inhibitor domain 1	1.30985	0.477177	0.999983	1.23611	0.458643	-1.65207	-2.87446	1.30985	0.477177	2.56011	3.976	0.650555	2.36685	10.4225	11.5588	10.8132	10.7158
ENSCSAG00000015067	TCTA	T cell leukemia translocation altered	1.30714	0.219392	0.999983	1.30254	0.190214	0.415038	-0.884521	1.30714	0.219392	8.9604	6.958	5.85499	7.10054	6.25347	6.22398	15.1384	8.76749
ENSCSAG00000003393	ZNF576	zinc finger protein 576	1.30656	0.367154	0.999983	1.30656	0.367154	1.67807	0.192647	1.34365	0.322053	9.60042	5.964	8.45721	0	1.04225	4.4457	2.16263	4.87083
ENSCSAG00000000378	KCNS3	potassium voltage-gated channel modifier subfamily S member 3	1.30485	0.286765	0.999983	1.26609	0.224825	-2.96683	-4.42146	1.30485	0.286765	10.2405	11.928	7.1561	0	91.7176	80.0226	70.2856	79.8816
ENSCSAG00000009012	C16orf71		1.30461	0.479282	0.999983	1.25577	0.478972	1.38276e-06	-1.58496	1.30461	0.479282	5.76025	1.988	3.90333	0	3.12674	5.33484	5.40658	6.81916
ENSCSAG00000011907	ABHD17A	abhydrolase domain containing 17A, depalmitoylase	1.30257	0.154868	0.999983	1.28095	0.0963108	-2.38543	-3.66533	1.30257	0.154868	28.1612	11.928	13.6617	2.36685	118.816	89.8031	118.945	83.7783
ENSCSAG00000008764			1.30194	0.310603	0.999983	1.29362	0.27204	0.137505	-1.152	1.30194	0.310603	5.12023	5.964	3.90333	4.73369	6.25347	3.55656	11.8945	7.79333
ENSCSAG00000013470	HNF4G	hepatocyte nuclear factor 4 gamma	1.30061	0.344312	0.999983	1.28291	0.30844	-0.241007	-1.51457	1.30061	0.344312	5.76025	4.97	4.55388	2.36685	7.29572	6.22398	10.8132	8.76749
ENSCSAG00000003734			1.30029	0.386429	0.999983	1.25571	0.322963	-3.33628	-4.58496	1.30029	0.386429	4.4802	5.964	2.60222	2.36685	47.9433	53.3484	51.9032	68.1916
ENSCSAG00000011007	LMNTD2	lamin tail domain containing 2	1.29852	0.621697	0.999983	1.29852	0.621697	-0.807351	-2.70043	1.36299	0.598695	1.28006	2.982	1.95166	0	2.08449	5.33484	6.4879	6.81916
ENSCSAG00000002070			1.29575	0.482375	0.999983	1.2088	0.450463	-3.70043	-4.90688	1.29575	0.482375	3.20014	3.976	1.30111	2.36685	46.901	43.5678	60.5537	29.225
ENSCSAG00000017884			1.29545	0.667794	0.999983	1.29545	0.667794	0.584959	-1.32192	1.31225	0.642968	0.640028	1.988	1.95166	0	1.04225	0.88914	3.24395	1.94833
ENSCSAG00000012624	LAMC2	laminin subunit gamma 2	1.29545	0.664417	0.999983	1.29545	0.664417	0.584959	-1.32192	1.31225	0.642968	1.28006	1.988	1.95166	0	1.04225	0.88914	1.08132	3.89666
ENSCSAG00000013370	RGS2		1.29134	0.219772	0.999983	1.29134	0.219772	1	-0.280106	1.29853	0.203472	10.8805	12.922	11.71	2.36685	2.08449	9.78054	3.24395	13.6383
ENSCSAG00000017203	UST		1.28806	0.295051	0.999983	1.25074	0.256484	-0.754886	-2	1.28806	0.295051	8.32037	7.952	5.20444	2.36685	14.5914	11.5588	16.2197	11.69
ENSCSAG00000002487	IGF2BP1	insulin like growth factor 2 mRNA binding protein 1	1.28631	0.0885606	0.999983	1.28631	0.0885606	1.3388	0.0544488	1.2929	0.0716781	19.2008	23.856	18.2155	9.46738	8.33796	8.8914	8.65053	16.5608
ENSCSAG00000010452	CCDC85C	coiled-coil domain containing 85C	1.28503	0.064867	0.999983	1.2784	0.0400841	-0.273018	-1.5502	1.28503	0.064867	26.8812	20.874	18.8661	9.46738	33.3518	24.8959	47.5779	34.0958
ENSCSAG00000008513			1.28466	0.206436	0.999983	1.28466	0.206436	2.41504	1.1375	1.28518	0.107006	11.5205	19.88	10.4089	11.8342	2.08449	4.4457	2.16263	7.79333
ENSCSAG00000007616	DLL4		1.28246	0.522009	0.999983	1.28246	0.522009	0.263035	-0.999995	1.34994	0.503543	0.640028	4.97	0.650555	2.36685	2.08449	2.66742	2.16263	3.89666
ENSCSAG00000018451	ITPRIP		1.28096	0.0858776	0.999983	1.28096	0.0858776	1.48543	0.206452	1.28513	0.0649264	26.2412	15.904	16.2639	14.2011	9.38021	6.22398	8.65053	16.5608
ENSCSAG00000019663	ZNF329	zinc finger protein 329	1.27858	0.422252	0.999983	1.23283	0.394489	-0.932884	-2.43295	1.27858	0.422252	7.04031	3.976	4.55388	0	11.4647	9.78054	12.9758	13.6383
ENSCSAG00000015919	ZNF395	zinc finger protein 395	1.27437	0.0354336	0.999983	1.26743	0.0202073	-0.543142	-1.80735	1.27437	0.0354336	37.1216	32.802	16.2639	11.8342	58.3657	44.457	49.7406	47.7341
ENSCSAG00000008033	TRIM7		1.27405	0.27468	0.999983	1.27405	0.27468	0.263035	-0.999997	1.30929	0.27336	7.04031	10.934	5.20444	2.36685	8.33796	7.11312	9.73185	3.89666
ENSCSAG00000008147	CNIH2	cornichon family AMPA receptor auxiliary protein 2	1.27328	0.403959	0.999983	1.27328	0.403959	2.58495	1.32193	1.27095	0.305313	6.40028	5.964	2.60222	7.10054	0	1.77828	2.16263	1.94833
ENSCSAG00000007213	HPCAL1	hippocalcin like 1	1.27304	0.00884793	0.999983	1.27304	0.00884793	0.976917	-0.296392	1.27798	0.00843306	56.9625	66.598	37.7322	18.9348	34.3941	29.3416	37.8461	32.1475
ENSCSAG00000000632	B3GALT6	beta-1,3-galactosyltransferase 6	1.26932	0.0977684	0.999983	1.26477	0.0739397	0.0848896	-1.17688	1.26932	0.0977684	16.0007	18.886	14.3122	9.46738	14.5914	17.7828	33.5208	17.535
ENSCSAG00000008780	PRR7	proline rich 7, synaptic	1.26925	0.178398	0.999983	1.25578	0.135009	-0.60407	-1.85415	1.26925	0.178398	12.8006	11.928	7.80666	4.73369	18.7604	18.6719	28.1142	19.4833
ENSCSAG00000003469	SLC36A4	solute carrier family 36 member 4	1.26847	0.472344	0.999983	1.26847	0.472344	1.84984e-06	-1.22239	1.32636	0.456333	2.56011	4.97	0.650555	2.36685	2.08449	6.22398	6.4879	0.974166
ENSCSAG00000018893		zinc finger CCCH-type containing 10	1.26763	0.435916	0.999983	1.26763	0.435916	3.82353	2.50635	1.32172	0.413799	46.082	492.03	33.1783	92.307	18.7604	18.6719	10.8132	10.7158
ENSCSAG00000015226	HOMER1	homer scaffold protein 1	1.2672	0.0160105	0.999983	1.26051	0.00519901	-1.53817	-2.79647	1.2672	0.0160105	44.162	49.7	18.8661	18.9348	121.943	151.154	121.107	143.202
ENSCSAG00000017034	CRTC3	CREB regulated transcription coactivator 3	1.26467	0.0523648	0.999983	1.25584	0.0322187	-0.421463	-1.6746	1.26467	0.0523648	26.2412	29.82	13.6617	11.8342	35.4363	40.0113	36.7648	45.7858
ENSCSAG00000006962	SP140		1.26266	0.587032	0.999983	1.26266	0.587032	6.56367e-12	-1.26303	1.78446	0.464406	1.92008	0	2.60222	2.36685	1.04225	0.88914	3.24395	8.76749
ENSCSAG00000003528	B9D2	B9 domain containing 2	1.25971	0.0260172	0.999983	1.2556	0.0149369	0.0558537	-1.19878	1.25971	0.0260172	39.6818	38.766	29.9255	14.2011	38.5631	37.3439	56.2285	44.8116
ENSCSAG00000000006	ND1	NADH dehydrogenase subunit 1	1.2568	0.00990948	0.999983	1.2568	0.00990948	0.989029	-0.266279	1.2582	0.00789936	49.9222	80.514	48.1411	26.0353	23.9716	41.7896	25.9516	63.3208
ENSCSAG00000003148	GINS2	GINS complex subunit 2	1.25455	0.114236	0.999983	1.25162	0.0961071	0.245113	-0.999999	1.25455	0.114236	16.0007	15.904	12.3605	9.46738	7.29572	20.4502	19.4637	23.38
ENSCSAG00000016424	TMEM163		1.25408	0.264471	0.999983	1.25408	0.264471	1.24793	1.58901e-06	1.26756	0.232469	10.8805	7.952	3.90333	7.10054	3.12674	5.33484	6.4879	4.87083
ENSCSAG00000010062	MARK3	microtubule affinity regulating kinase 3	1.25392	0.00511111	0.999983	1.25121	0.00120718	-0.887525	-2.1383	1.25392	0.00511111	63.3628	76.538	53.9961	28.4021	128.196	130.704	153.547	207.497
ENSCSAG00000003254	TRPC6		1.25216	0.684773	0.999983	1.65071	0.613529	0.584959	-1.58495	1.25216	0.684773	1.28006	1.988	1.30111	0	1.04225	0.88914	0	2.9225
ENSCSAG00000010387	C1QTNF2	C1q and TNF related 2	1.25212	0.453333	0.999983	1.23748	0.438155	0.222393	-0.999996	1.25212	0.453333	2.56011	3.976	3.25277	2.36685	2.08449	4.4457	3.24395	6.81916
ENSCSAG00000000035	CYTB	cytochrome b	1.24916	0.130454	0.999983	1.24916	0.130454	1.93391	0.691054	1.24465	0.00232245	81.9236	173.95	81.9699	52.0706	15.6337	50.681	8.65053	74.0366
ENSCSAG00000001258		periphilin-1-like	1.24904	0.515666	0.999983	1.24904	0.515666	1.58077e-06	-1.22239	1.31253	0.505265	3.84017	1.988	0.650555	2.36685	2.08449	4.4457	3.24395	3.89666
ENSCSAG00000002927	CRY1	cryptochrome circadian regulator 1	1.24714	0.00579994	0.999983	1.24714	0.00579994	0.797812	-0.447458	1.24869	0.00564964	58.2426	54.67	32.5277	33.1358	26.0561	39.1221	37.8461	51.6308
ENSCSAG00000009372	MAP1LC3C	microtubule associated protein 1 light chain 3 gamma	1.24655	0.170048	0.999983	1.24655	0.170048	1.58496	0.341038	1.25442	0.123964	14.0806	18.886	7.1561	11.8342	6.25347	5.33484	9.73185	4.87083
ENSCSAG00000007220			1.24292	0.0389302	0.999983	1.23962	0.0127538	-1.84461	-3.08377	1.24292	0.0389302	34.5615	35.784	34.4794	11.8342	127.154	128.036	193.556	195.807
ENSCSAG00000014738	SCML2		1.24127	0.228643	0.999983	1.24818	0.221085	1.48543	0.234467	1.24127	0.228643	8.9604	4.97	5.85499	14.2011	2.08449	2.66742	7.56922	8.76749
ENSCSAG00000012674	ADGRF4	adhesion G protein-coupled receptor F4	1.24091	0.673462	0.999983	1.24091	0.673462	-1.58496	-3.80733	1.35458	0.623092	0.640028	2.982	0.650555	0	6.25347	6.22398	2.16263	11.69
ENSCSAG00000015244	LAMB3	laminin subunit beta 3	1.24064	0.409852	0.999983	1.17576	0.384169	-1.29545	-2.45943	1.24064	0.409852	6.40028	4.97	1.95166	2.36685	14.5914	12.448	9.73185	11.69
ENSCSAG00000005486	TRAF6		1.23931	0.138091	0.999983	1.22422	0.113333	0.257158	-0.96829	1.23931	0.138091	24.3211	24.85	20.8178	2.36685	15.6337	24.8959	17.3011	28.2508
ENSCSAG00000003279	TUBG1	tubulin gamma-1 chain	1.23895	0.221696	0.999983	1.22864	0.183379	-0.115476	-1.34104	1.23895	0.221696	10.8805	12.922	13.0111	2.36685	9.38021	16.8937	14.0571	24.3542
ENSCSAG00000000010	MT-ND2		1.23747	0.209446	0.999983	1.23747	0.209446	1.99159	0.752911	1.2403	0.165865	188.808	324.044	209.479	63.9048	34.3941	95.1379	25.9516	136.383
ENSCSAG00000015988	HTRA3		1.2355	0.0828697	0.999983	1.2355	0.0828697	1.23447	1.02908e-06	1.23823	0.0742103	19.8409	19.88	19.5166	11.8342	11.4647	6.22398	12.9758	18.5092
ENSCSAG00000000938	IFNLR1	interferon lambda receptor 1	1.23521	0.372808	0.999983	1.19809	0.336768	-0.807353	-2	1.23521	0.372808	3.84017	7.952	3.90333	2.36685	9.38021	12.448	14.0571	9.74166
ENSCSAG00000000419			1.23404	0.338564	0.999983	1.19445	0.281131	-2.47999	-3.86507	1.23404	0.338564	8.32037	10.934	6.50555	0	58.3657	48.0135	47.5779	53.5791
ENSCSAG00000008951	ROGDI	rogdi atypical leucine zipper	1.23397	0.0692817	0.999983	1.23397	0.0692817	1.63472	0.402099	1.23724	0.0411167	24.3211	34.79	18.2155	18.9348	12.5069	6.22398	16.2197	11.69
ENSCSAG00000019729	TLNRD1	talin rod domain containing 1	1.23299	0.526376	0.999983	1.16137	0.506869	-2.54432	-3.70043	1.23299	0.526376	3.84017	1.988	0.650555	2.36685	20.8449	14.2262	20.545	17.535
ENSCSAG00000000768	SLC25A33	solute carrier family 25 member 33	1.23187	0.151404	0.999983	1.21039	0.103708	-1.41504	-2.62149	1.23187	0.151404	14.0806	21.868	8.45721	4.73369	52.1123	44.457	33.5208	45.7858
ENSCSAG00000009593	GLIS2	GLIS family zinc finger 2	1.22994	0.157844	0.999983	1.22386	0.118961	-0.054447	-1.27563	1.22994	0.157844	10.8805	14.91	7.1561	11.8342	12.5069	14.2262	24.8703	21.4317
ENSCSAG00000014739			1.22936	0.248533	0.999983	1.21094	0.196996	-0.62449	-1.8365	1.22936	0.248533	17.9208	5.964	12.3605	2.36685	19.8027	16.8937	24.8703	25.3283
ENSCSAG00000014339	RPH3AL		1.22743	0.20076	0.999983	1.21905	0.174401	0.0641313	-1.14684	1.22743	0.20076	13.4406	9.93999	9.10777	4.73369	15.6337	6.22398	12.9758	17.535
ENSCSAG00000013895	ENG		1.22622	0.00434068	0.999983	1.22622	0.00434068	1.66297	0.437687	1.22818	0.00100388	97.9243	111.328	64.4049	42.6032	21.8871	43.5678	28.1142	50.6566
ENSCSAG00000016249	SLC17A9	solute carrier family 17 member 9	1.22616	0.201346	0.999983	1.21322	0.175155	9.38562e-07	-1.20645	1.22616	0.201346	14.7207	8.94599	5.85499	7.10054	10.4225	14.2262	10.8132	18.5092
ENSCSAG00000009166	DUSP18		1.22529	0.532367	0.999983	1.1467	0.520203	-1.73696	-2.87446	1.22529	0.532367	3.84017	1.988	1.30111	2.36685	10.4225	9.78054	7.56922	13.6383
ENSCSAG00000014187	VILL	villin like	1.22468	0.540682	0.999983	1.22468	0.540682	-0.192643	-1.99999	1.32279	0.516224	2.56011	3.976	1.95166	0	4.16898	3.55656	5.40658	2.9225
ENSCSAG00000019631			1.2231	0.539454	0.999983	1.20981	0.523936	-1.22239	-2.75488	1.2231	0.539454	4.4802	1.988	3.90333	0	6.25347	8.00226	8.65053	17.535
ENSCSAG00000008320	SH3BGR		1.2229	0.321934	0.999983	1.2229	0.321934	2.58496	1.36257	1.22259	0.226159	8.32037	9.93999	3.90333	14.2011	3.12674	0	4.32527	2.9225
ENSCSAG00000013603			1.22213	0.446569	0.999983	1.1955	0.404268	-1.24792	-2.43295	1.22213	0.446569	5.12023	2.982	2.60222	2.36685	12.5069	6.22398	16.2197	10.7158
ENSCSAG00000015052	PTGER2	prostaglandin E receptor 2	1.22113	0.330956	0.999983	1.20193	0.312408	0.106916	-1.08746	1.22113	0.330956	7.68034	5.964	5.85499	2.36685	4.16898	8.8914	9.73185	6.81916
ENSCSAG00000001809	ZNF268		1.22093	0.51378	0.999983	1.15542	0.501416	-2.16992	-3.73696	1.22093	0.51378	2.56011	4.97	3.25277	0	14.5914	21.3394	18.3824	22.4058
ENSCSAG00000001539	TMEM167B		1.22027	0.360158	0.999983	1.22027	0.360158	2.70044	1.48543	1.2317	0.217375	10.8805	14.91	11.71	2.36685	0	3.55656	4.32527	0.974166
ENSCSAG00000015814	NOVA1	NOVA alternative splicing regulator 1	1.21907	0.45164	0.999983	1.21907	0.45164	1.22239	-0.321926	1.28735	0.38886	5.12023	8.94599	3.90333	0	2.08449	4.4457	2.16263	2.9225
ENSCSAG00000001465	BTBD8		1.21709	0.0791564	0.999983	1.21709	0.0791564	0.570316	-0.641545	1.22222	0.0776659	24.3211	24.85	16.2639	9.46738	11.4647	22.2285	11.8945	27.2766
ENSCSAG00000003700			1.21462	0.249666	0.999983	1.21462	0.249666	1.51457	0.299562	1.22009	0.221988	12.1605	7.952	3.90333	11.8342	3.12674	3.55656	7.56922	4.87083
ENSCSAG00000005151	ADGRL3		1.21423	0.435742	0.999983	1.21423	0.435742	0.514574	-0.678069	1.24611	0.421877	1.92008	7.952	2.60222	2.36685	1.04225	6.22398	5.40658	2.9225
ENSCSAG00000013199	SNAPC5	small nuclear RNA activating complex polypeptide 5	1.21304	0.0905105	0.999983	1.21304	0.0905105	1.8365	0.624492	1.21658	0.0532821	21.1209	28.826	18.2155	18.9348	9.38021	5.33484	10.8132	12.6642
ENSCSAG00000015793	FUT10	fucosyltransferase 10	1.20933	0.253051	0.999983	1.18947	0.226072	-0.137502	-1.32193	1.20933	0.253051	11.5205	7.952	5.20444	4.73369	9.38021	13.3371	10.8132	13.6383
ENSCSAG00000015054	AP3M2	adaptor related protein complex 3 subunit mu 2	1.20848	0.136248	0.999983	1.20146	0.114801	0.383329	-0.817135	1.20848	0.136248	16.6407	12.922	11.71	9.46738	11.4647	12.448	18.3824	18.5092
ENSCSAG00000007453	ZIC3	Zic family member 3	1.20762	0.506768	0.999983	1.68748	0.388522	1.58496	0.415037	1.20762	0.506768	2.56011	2.982	1.95166	2.36685	0	1.77828	3.24395	0
ENSCSAG00000004931	MAPK11	mitogen-activated protein kinase 11	1.20694	0.43684	0.999983	1.16016	0.412205	-0.847995	-2	1.20694	0.43684	1.92008	7.952	3.25277	2.36685	12.5069	5.33484	11.8945	7.79333
ENSCSAG00000003078	C17orf113		1.2024	0.518129	0.999983	1.2024	0.518129	0.192646	-0.999996	1.29462	0.485963	1.28006	6.958	1.30111	2.36685	3.12674	4.4457	2.16263	3.89666
ENSCSAG00000001112	C1orf109	chromosome unknown C1orf109 homolog	1.20096	0.12273	0.999983	1.19502	0.107682	0.374396	-0.817135	1.20096	0.12273	15.3607	19.88	12.3605	9.46738	15.6337	10.6697	20.545	15.5867
ENSCSAG00000002116	HEXD	hexosaminidase D	1.19893	0.333587	0.999983	1.16503	0.319525	-0.436098	-1.58496	1.19893	0.333587	6.40028	10.934	3.90333	2.36685	12.5069	9.78054	12.9758	4.87083
ENSCSAG00000008826	HAUS2	HAUS augmin like complex subunit 2	1.19879	0.0212122	0.999983	1.19879	0.0212122	0.984233	-0.214124	1.20299	0.0184215	50.5622	39.76	22.1189	28.4021	19.8027	25.7851	27.0329	31.1733
ENSCSAG00000004301		ATP binding cassette subfamily G member 2 (Junior blood group)	1.19763	0.45346	0.999983	1.19763	0.45346	1.41503	0.222394	1.1982	0.434943	5.76025	1.988	5.20444	2.36685	1.04225	1.77828	4.32527	1.94833
ENSCSAG00000003472	MPP2	membrane palmitoylated protein 2	1.19688	0.495132	0.999983	1.19688	0.495132	0.874469	-0.736962	1.28162	0.44279	3.84017	6.958	2.60222	0	3.12674	2.66742	2.16263	2.9225
ENSCSAG00000008544	ADORA2B		1.19536	0.175124	0.999983	1.18953	0.12354	-0.526068	-1.71272	1.19536	0.175124	11.5205	12.922	11.0594	7.10054	17.7182	17.7828	29.1955	30.1991
ENSCSAG00000017325	SRSF12		1.19514	0.297072	0.999983	1.18806	0.256267	1.04007e-06	-1.18442	1.19514	0.297072	8.32037	5.964	5.85499	4.73369	7.29572	7.11312	10.8132	13.6383
ENSCSAG00000002935	CYP4V2	cytochrome P450 family 4 subfamily V member 2	1.19465	0.269007	0.999983	1.19332	0.263537	1.09954	-0.0931078	1.19465	0.269007	3.84017	10.934	7.80666	7.10054	3.12674	3.55656	6.4879	9.74166
ENSCSAG00000016302	RNF217		1.19419	0.26283	0.999983	1.16504	0.223385	-0.798365	-1.95936	1.19419	0.26283	12.1605	10.934	7.1561	2.36685	17.7182	22.2285	17.3011	17.535
ENSCSAG00000019719	SMIM3	small integral membrane protein 3	1.19092	0.493356	0.999983	1.13167	0.48006	-0.999997	-2.45943	1.19092	0.493356	4.4802	4.97	3.90333	0	8.33796	9.78054	11.8945	9.74166
ENSCSAG00000008095		popy class I histocompatibility antigen, alpha chain E	1.18956	0.210526	0.999983	1.18956	0.210526	1.35364	0.169926	1.1898	0.184008	12.8006	9.93999	9.10777	9.46738	3.12674	6.22398	9.73185	5.845
ENSCSAG00000017247	LRP11	LDL receptor related protein 11	1.18956	0.0286452	0.999983	1.18464	0.0206696	0.200698	-0.982721	1.18956	0.0286452	40.9618	35.784	20.8178	21.3016	31.2674	35.5656	47.5779	35.07
ENSCSAG00000000879	SLC66A1	solute carrier family 66 member 1	1.18935	0.123624	0.999983	1.18935	0.123624	1.12928	-0.0565824	1.19143	0.108772	17.9208	16.898	13.0111	11.8342	10.4225	6.22398	17.3011	8.76749
ENSCSAG00000009735	IFNAR2	interferon alpha and beta receptor subunit 2	1.18792	0.0862849	0.999983	1.18287	0.0501045	-0.7625	-1.94429	1.18792	0.0862849	26.8812	28.826	26.0222	7.10054	34.3941	61.3506	71.3669	55.5275
ENSCSAG00000000298	CCDC160		1.18224	0.550376	0.999983	1.21781	0.517155	0.999996	-0.22239	1.18224	0.550376	1.28006	2.982	1.30111	4.73369	1.04225	0.88914	3.24395	3.89666
ENSCSAG00000006940	CCNQ	cyclin Q	1.18004	0.124418	0.999983	1.16896	0.0885114	-0.8365	-2	1.18004	0.124418	17.9208	23.856	8.45721	9.46738	45.8588	29.3416	37.8461	30.1991
ENSCSAG00000014065	DGKG	diacylglycerol kinase gamma	1.17943	0.259583	0.999983	1.15959	0.254196	0.304856	-0.847995	1.17943	0.259583	8.32037	12.922	5.20444	4.73369	10.4225	7.11312	7.56922	9.74166
ENSCSAG00000004409	SLC39A11	solute carrier family 39 member 11	1.17938	0.0259283	0.999983	1.17938	0.0259283	0.822002	-0.355094	1.18398	0.0222722	44.802	53.676	26.0222	16.5679	34.3941	22.2285	29.1955	26.3025
ENSCSAG00000015033	SPATA2	spermatogenesis associated 2	1.17915	0.0838629	0.999983	1.17561	0.0684841	0.330149	-0.842458	1.17915	0.0838629	19.2008	24.85	14.9628	14.2011	18.7604	16.0045	32.4395	20.4575
ENSCSAG00000009655	RBMS3		1.17862	0.309983	0.999983	1.17862	0.309983	1.76553	0.584964	1.18642	0.270301	4.4802	12.922	10.4089	4.73369	2.08449	2.66742	6.4879	3.89666
ENSCSAG00000004276	THAP8	THAP domain containing 8	1.17791	0.206276	0.999983	1.17791	0.206276	1.24793	0.0703907	1.17505	0.20608	8.32037	10.934	7.1561	14.2011	5.21123	2.66742	12.9758	6.81916
ENSCSAG00000014795	MEIS1	Meis homeobox 1	1.17644	0.377957	0.999983	1.17644	0.377957	1.58496	0.415038	1.20424	0.300256	8.9604	8.94599	5.85499	2.36685	3.12674	2.66742	3.24395	2.9225
ENSCSAG00000012265	E2F1	E2F transcription factor 1	1.1764	0.104585	0.999983	1.16714	0.0527242	-2.50611	-3.66985	1.1764	0.104585	19.2008	27.832	7.80666	14.2011	142.788	124.48	165.441	114.952
ENSCSAG00000015445	WASF1	WASP family member 1	1.17508	0.136662	0.999983	1.17508	0.136662	1.46949	0.295457	1.18001	0.110107	17.9208	17.892	10.4089	16.5679	7.29572	6.22398	9.73185	11.69
ENSCSAG00000001039			1.17449	0.580026	0.999983	1.10066	0.57777	-1.48542	-2.58495	1.17449	0.580026	1.28006	3.976	1.30111	2.36685	8.33796	6.22398	10.8132	6.81916
ENSCSAG00000001915	CACNG7	calcium voltage-gated channel auxiliary subunit gamma 7	1.17438	0.0954728	0.999983	1.17438	0.0954728	0.518468	-0.652076	1.18663	0.0927223	27.5212	24.85	13.6617	7.10054	12.5069	24.0068	17.3011	15.5867
ENSCSAG00000001194	CCDC24		1.17231	0.604929	0.999983	1.17231	0.604929	-0.415035	-2.16992	1.26268	0.572489	5.12023	0.993999	1.95166	0	3.12674	5.33484	3.24395	5.845
ENSCSAG00000003322	FAM160A1	family with sequence similarity 160 member A1	1.17215	0.384663	0.999983	1.15525	0.347502	-0.241007	-1.39231	1.17215	0.384663	6.40028	4.97	5.85499	2.36685	9.38021	4.4457	9.73185	10.7158
ENSCSAG00000002265	MSI1		1.17044	0.152065	0.999983	1.17044	0.152065	0.825971	-0.337034	1.17602	0.13421	15.3607	23.856	6.50555	11.8342	11.4647	10.6697	5.40658	18.5092
ENSCSAG00000009539	PTP4A3	protein tyrosine phosphatase 4A3	1.16813	0.42865	0.999983	1.16813	0.42865	1.58496	0.415039	1.19422	0.382475	5.12023	6.958	1.30111	7.10054	2.08449	1.77828	2.16263	3.89666
ENSCSAG00000012891	PRICKLE3	prickle planar cell polarity protein 3	1.16405	0.177955	0.999983	1.15179	0.165661	0.430635	-0.719891	1.16405	0.177955	12.8006	17.892	5.20444	11.8342	12.5069	9.78054	12.9758	14.6125
ENSCSAG00000005223	SLC25A42	solute carrier family 25 member 42	1.16274	0.445157	0.999983	1.16274	0.445157	0.584963	-0.847994	1.2146	0.428263	6.40028	5.964	4.55388	0	4.16898	4.4457	5.40658	3.89666
ENSCSAG00000007412	AMN1	antagonist of mitotic exit network 1 homolog	1.16234	0.281607	0.999983	1.16234	0.281607	1.152	1.67999e-06	1.16731	0.252415	12.8006	6.958	7.80666	4.73369	4.16898	5.33484	2.16263	10.7158
ENSCSAG00000012182	CEBPZOS		1.16191	0.0630841	0.999983	1.16191	0.0630841	2.20945	1.04731	1.16417	0.0234088	35.8416	37.772	36.4311	26.0353	5.21123	10.6697	11.8945	17.535
ENSCSAG00000000032	ND5	NADH dehydrogenase subunit 5	1.16168	0.181215	0.999983	1.16168	0.181215	1.72844	0.566612	1.16158	0.158075	549.144	855.833	556.875	184.614	131.323	293.416	113.538	386.744
ENSCSAG00000003606	PLK4	polo like kinase 4	1.15931	0.120614	0.999983	1.14836	0.0773526	-1.0473	-2.19264	1.15931	0.120614	17.9208	26.838	14.3122	7.10054	47.9433	45.3461	37.8461	58.45
ENSCSAG00000000504			1.15884	0.471896	0.999983	1.15884	0.471896	0.847996	-0.51457	1.17465	0.471513	2.56011	5.964	7.1561	0	3.12674	1.77828	3.24395	6.81916
ENSCSAG00000010209	SIPA1L2	signal induced proliferation associated 1 like 2	1.15594	0.551794	0.999983	1.08819	0.545861	-1.58496	-2.66296	1.15594	0.551794	3.84017	1.988	1.30111	2.36685	9.38021	8.8914	10.8132	7.79333
ENSCSAG00000008825	F12	coagulation factor XII	1.15455	0.237002	0.999983	1.14058	0.213175	0.137504	-0.999998	1.15455	0.237002	8.9604	12.922	5.85499	7.10054	11.4647	8.8914	12.9758	12.6642
ENSCSAG00000002598	TBKBP1	TBK1 binding protein 1	1.15443	0.59784	0.999983	1.15443	0.59784	-0.584959	-1.73696	1.48221	0.498623	5.76025	0	0.650555	2.36685	6.25347	2.66742	5.40658	4.87083
ENSCSAG00000009597	NEURL1B	neuralized E3 ubiquitin protein ligase 1B	1.15175	0.10732	0.999983	1.13952	0.0713454	-0.222392	-1.365	1.15175	0.10732	39.6818	25.844	27.9739	4.73369	39.6053	37.3439	42.1713	42.8633
ENSCSAG00000008915	ZNF692	zinc finger protein 692	1.1511	0.168194	0.999983	1.14384	0.127122	-0.311943	-1.45251	1.1511	0.168194	11.5205	16.898	10.4089	9.46738	15.6337	20.4502	31.3582	21.4317
ENSCSAG00000012224	ZNF74		1.15071	0.166358	0.999983	1.15404	0.139435	0.473932	-0.678071	1.15071	0.166358	10.2405	14.91	15.6133	9.46738	12.5069	5.33484	24.8703	14.6125
ENSCSAG00000014809	AIF1L	allograft inflammatory factor 1 like	1.14958	0.138099	0.999983	1.14958	0.138099	1.80735	0.658964	1.15496	0.0810837	23.041	25.844	18.2155	11.8342	8.33796	6.22398	12.9758	5.845
ENSCSAG00000017308			1.14852	0.144758	0.999983	1.13865	0.10742	-0.0671135	-1.20645	1.14852	0.144758	16.6407	24.85	21.4683	4.73369	23.9716	19.5611	27.0329	33.1216
ENSCSAG00000017874	RFXAP		1.14742	0.188407	0.999983	1.14742	0.188407	1.36923	0.222394	1.15474	0.159414	17.9208	12.922	14.3122	7.10054	6.25347	6.22398	7.56922	9.74166
ENSCSAG00000009450	RNF215		1.14717	0.0622704	0.999983	1.14496	0.0530214	0.545435	-0.597901	1.14717	0.0622704	31.3614	22.862	17.565	18.9348	16.6759	19.5611	32.4395	24.3542
ENSCSAG00000008562	ZNF454		1.14689	0.60311	0.999983	1.14689	0.60311	-0.192643	-2.32192	1.31477	0.544651	1.92008	4.97	1.30111	0	5.21123	2.66742	2.16263	2.9225
ENSCSAG00000000827	TMEM51	transmembrane protein 51	1.14668	0.0319816	0.999983	1.14668	0.0319816	0.883187	-0.263034	1.15054	0.0301057	38.4017	44.73	31.2266	18.9348	17.7182	26.6742	23.789	36.0441
ENSCSAG00000012957	CCDC141	coiled-coil domain containing 141	1.14551	0.674019	0.999983	1.48815	0.599611	0.415037	-1.58495	1.14551	0.674019	1.92008	1.988	1.30111	0	2.08449	0.88914	0	2.9225
ENSCSAG00000008429	PEMT		1.14517	0.268877	0.999983	1.13268	0.233457	-0.144389	-1.27302	1.14517	0.268877	7.68034	10.934	4.55388	7.10054	8.33796	13.3371	11.8945	16.5608
ENSCSAG00000016237	ST3GAL5	ST3 beta-galactoside alpha-2,3-sialyltransferase 5	1.14174	0.44823	0.999983	1.13595	0.399816	-0.584961	-1.7162	1.14174	0.44823	4.4802	3.976	5.20444	2.36685	6.25347	6.22398	11.8945	10.7158
ENSCSAG00000007689	ZNF449	zinc finger protein 449	1.14089	0.374501	0.999983	1.14089	0.374501	1.1375	1.7955e-06	1.14099	0.368319	5.76025	4.97	3.25277	7.10054	2.08449	2.66742	6.4879	3.89666
ENSCSAG00000002707	ANKRD13A		1.1399	0.0605849	0.999983	1.13327	0.0336483	-0.544805	-1.67807	1.1399	0.0605849	37.7617	46.718	30.5761	9.46738	69.8304	54.2375	61.635	66.2433
ENSCSAG00000010021	CCDC136		1.13964	0.192968	0.999983	1.14238	0.17285	0.807355	-0.334418	1.13964	0.192968	11.5205	8.94599	13.6617	9.46738	8.33796	4.4457	16.2197	12.6642
ENSCSAG00000017305	SH3GL3	SH3 domain containing GRB2 like 3, endophilin A3	1.13957	0.462498	0.999983	1.09158	0.43806	-1.32193	-2.67807	1.13957	0.462498	4.4802	7.952	4.55388	0	15.6337	14.2262	12.9758	19.4833
ENSCSAG00000009772	UBE2E2		1.13723	0.142237	0.999983	1.13723	0.142237	1.07039	-0.0641293	1.14481	0.1195	23.681	17.892	13.0111	9.46738	9.38021	10.6697	8.65053	13.6383
ENSCSAG00000007633	TET1	tet methylcytosine dioxygenase 1	1.1371	0.238493	0.999983	1.10499	0.196425	-1.2854	-2.38466	1.1371	0.238493	16.6407	14.91	7.1561	2.36685	35.4363	42.6787	23.789	23.38
ENSCSAG00000013658	SLX4IP		1.13708	0.208821	0.999983	1.1186	0.183337	-0.229481	-1.34395	1.13708	0.208821	12.8006	15.904	8.45721	4.73369	13.5492	20.4502	20.545	11.69
ENSCSAG00000008044	ZSCAN23	zinc finger and SCAN domain containing 23	1.1361	0.478464	0.999983	1.09785	0.464561	-0.169923	-1.26303	1.1361	0.478464	4.4802	3.976	2.60222	2.36685	5.21123	4.4457	6.4879	5.845
ENSCSAG00000016214	CNIH3	cornichon family AMPA receptor auxiliary protein 3	1.13349	0.517847	0.999983	1.10149	0.514192	1.33823e-06	-1.37851	1.13349	0.517847	2.56011	4.97	4.55388	0	4.16898	4.4457	5.40658	7.79333
[truncated: 11,431 more rows]

[truncated: 4 more sheets: GO_TS_up, GO_TS_down, GO_TE_up, GO_TE_down]
